# Supplementary material for: High-quality carnivoran genomes from roadkill samples enable comparative species delineation in aardwolf and bat-eared fox
Source: eLife. 2021 Feb 18;10:e63167. doi: 10.7554/eLife.63167 (PMC7963486; doi:10.7554/eLife.63167)
Supplement: Supplementary file 1. [file elife-63167-supp1.xlsx]

## Sheet: mitochondrial_genetic_distances
Species 1	Species 2	Mitochondrial genetic distance (substitution per site)
Acinonyx_jubatus	Ailuropoda_melanoleuca	0.23977690953504
Acinonyx_jubatus	Ailurus_fulgens	0.231539252415341
Acinonyx_jubatus	Aonyx_cinereus	0.240060980582738
Acinonyx_jubatus	Arctocephalus_forsteri	0.238382260513751
Acinonyx_jubatus	Arctocephalus_pusillus	0.229983370411641
Acinonyx_jubatus	Arctocephalus_townsendi	0.235337827600393
Acinonyx_jubatus	Arctodus_simus	0.225908176593236
Acinonyx_jubatus	Arctonyx_collaris	0.228430194933086
Acinonyx_jubatus	Arctotherium_sp_	0.23420424346352
Acinonyx_jubatus	Bdeogale_nigripes_FMNH167685_SRR6053065	0.194930813426156
Acinonyx_jubatus	Callorhinus_ursinus	0.22631498047223
Acinonyx_jubatus	Canis_anthus	0.24145785830046
Acinonyx_jubatus	Canis_latrans	0.237796921820336
Acinonyx_jubatus	Canis_lupus	0.234276505586901
Acinonyx_jubatus	Caracal_caracal	0.117833840620456
Acinonyx_jubatus	Catopuma_badia	0.104009476538531
Acinonyx_jubatus	Catopuma_temminckii	0.107868989398182
Acinonyx_jubatus	Chrysocyon_brachyurus	0.230998578614542
Acinonyx_jubatus	Civettictis_civetta	0.17116373666409
Acinonyx_jubatus	Conepatus_chinga	0.23923193902576
Acinonyx_jubatus	Crocuta_crocuta	0.199213643673961
Acinonyx_jubatus	Cuon_alpinus	0.240297705907397
Acinonyx_jubatus	Cystophora_cristata	0.216283630460222
Acinonyx_jubatus	Enhydra_lutris	0.229261360810057
Acinonyx_jubatus	Erignathus_barbatus	0.215943586223516
Acinonyx_jubatus	Eumetopias_jubatus	0.227199567677153
Acinonyx_jubatus	Felis_catus	0.116890392002287
Acinonyx_jubatus	Felis_chaus	0.115965887532984
Acinonyx_jubatus	Felis_margarita	0.117943689865935
Acinonyx_jubatus	Felis_nigripes	0.117198262510035
Acinonyx_jubatus	Felis_silvestris	0.116787117768395
Acinonyx_jubatus	Fossa_fossana_FMNH156648_SRR6053060	0.182558137529981
Acinonyx_jubatus	Genetta_servalina	0.173173547105571
Acinonyx_jubatus	Gulo_gulo	0.236500479257428
Acinonyx_jubatus	Halichoerus_grypus	0.216370698840397
Acinonyx_jubatus	Helarctos_malayanus	0.235914052474836
Acinonyx_jubatus	Hyaena_hyaena	0.197077921305915
Acinonyx_jubatus	Hydrurga_leptonyx	0.208237883874568
Acinonyx_jubatus	Leopardus_colocolo	0.120168531290351
Acinonyx_jubatus	Leopardus_geoffroyi	0.12228306490072
Acinonyx_jubatus	Leopardus_guigna	0.122776934475837
Acinonyx_jubatus	Leopardus_jacobita	0.116385177407212
Acinonyx_jubatus	Leopardus_pardalis	0.116564592437902
Acinonyx_jubatus	Leopardus_tigrinus	0.120882775767795
Acinonyx_jubatus	Leopardus_wiedii	0.116941382207051
Acinonyx_jubatus	Leptailurus_serval	0.111798551698206
Acinonyx_jubatus	Leptonychotes_weddellii	0.209045727071242
Acinonyx_jubatus	Lobodon_carcinophaga	0.210718000676245
Acinonyx_jubatus	Lutra_lutra	0.232137189707761
Acinonyx_jubatus	Lutra_sumatrana	0.232630650001991
Acinonyx_jubatus	Lutrogale_perspicillata	0.24515010615481
Acinonyx_jubatus	Lycaon_pictus	0.233540351895116
Acinonyx_jubatus	Lynx_canadensis	0.106437786574005
Acinonyx_jubatus	Lynx_lynx	0.107823739916211
Acinonyx_jubatus	Lynx_pardinus	0.107299750060536
Acinonyx_jubatus	Lynx_rufus	0.107152109934135
Acinonyx_jubatus	Manis_javanica	0.2859691581718
Acinonyx_jubatus	Martes_americana	0.232179554881041
Acinonyx_jubatus	Martes_flavigula	0.234626420287232
Acinonyx_jubatus	Martes_foina	0.233092742851829
Acinonyx_jubatus	Martes_martes	0.231282330793169
Acinonyx_jubatus	Martes_melampus	0.229494739816668
Acinonyx_jubatus	Martes_pennanti	0.2353046464812
Acinonyx_jubatus	Martes_zibellina	0.233345143883257
Acinonyx_jubatus	Meles_anakuma	0.231406901686067
Acinonyx_jubatus	Meles_leucurus	0.224595093350034
Acinonyx_jubatus	Meles_meles	0.225960138321445
Acinonyx_jubatus	Melogale_moschata	0.235208474941846
Acinonyx_jubatus	Melursus_ursinus	0.241403688618916
Acinonyx_jubatus	Mephitis_mephitis	0.239156080733751
Acinonyx_jubatus	Mirounga_leonina	0.218861110535861
Acinonyx_jubatus	Mungotictis_decemlineata	0.185637276541506
Acinonyx_jubatus	Mustela_altaica	0.230167012482636
Acinonyx_jubatus	Mustela_erminea	0.224666904023612
Acinonyx_jubatus	Mustela_eversmannii	0.228512750880255
Acinonyx_jubatus	Mustela_frenata	0.224973532515469
Acinonyx_jubatus	Mustela_itatsi	0.230610439702013
Acinonyx_jubatus	Mustela_kathiah	0.226563079181231
Acinonyx_jubatus	Mustela_nigripes	0.225657569943898
Acinonyx_jubatus	Mustela_nivalis	0.230053973506493
Acinonyx_jubatus	Mustela_putorius	0.22678039962364
Acinonyx_jubatus	Mustela_sibirica	0.228532007112152
Acinonyx_jubatus	Nandinia_binotata	0.170968183851628
Acinonyx_jubatus	Nasua_nasua	0.24769135723093
Acinonyx_jubatus	Neofelis_nebulosa	0.150073514244868
Acinonyx_jubatus	Neomonachus_schauinslandi	0.215641011428203
Acinonyx_jubatus	Neophoca_cinerea	0.233113503565574
Acinonyx_jubatus	Neovison_vison	0.228725224137654
Acinonyx_jubatus	Nyctereutes_procyonoides	0.237374626096488
Acinonyx_jubatus	Odobenus_rosmarus_rosmarus	0.252256975157905
Acinonyx_jubatus	Otocolobus_manul	0.114486022617344
Acinonyx_jubatus	Otocyon_megalotis_megalotis_TS305	0.246574791037441
Acinonyx_jubatus	Otocyon_megalotis_virgatus_FMNH158128	0.243939417105553
Acinonyx_jubatus	Paguma_larvata	0.177281692748496
Acinonyx_jubatus	Panthera_leo	0.139361527019643
Acinonyx_jubatus	Panthera_onca	0.140664399614199
Acinonyx_jubatus	Panthera_pardus	0.141481651491483
Acinonyx_jubatus	Panthera_tigris	0.138932170296036
Acinonyx_jubatus	Panthera_uncia	0.146015346381987
Acinonyx_jubatus	Paradoxurus_hermaphroditus	0.181193800214311
Acinonyx_jubatus	Parahyaena_brunnea_FD126_Fecal	0.193699696938982
Acinonyx_jubatus	Pardofelis_marmorata	0.114735538058673
Acinonyx_jubatus	Phoca_fasciata	0.216646710653187
Acinonyx_jubatus	Phoca_groenlandica	0.217012753503262
Acinonyx_jubatus	Phoca_largha	0.217833648833497
Acinonyx_jubatus	Phoca_vitulina	0.217485005801878
Acinonyx_jubatus	Phocarctos_hookeri	0.232064652855975
Acinonyx_jubatus	Prionailurus_bengalensis	0.107945871077883
Acinonyx_jubatus	Prionailurus_bengalensis_euptilurus	0.110671307137767
Acinonyx_jubatus	Prionailurus_planiceps	0.111356666478108
Acinonyx_jubatus	Prionailurus_rubiginosus	0.110834710397032
Acinonyx_jubatus	Prionailurus_viverrinus	0.113346296017142
Acinonyx_jubatus	Prionodon_pardicolor	0.180696359596869
Acinonyx_jubatus	Procyon_lotor	0.231533684648182
Acinonyx_jubatus	Profelis_aurata	0.116668380530676
Acinonyx_jubatus	Proteles_cristatus_cristatus_TS307	0.203028546485901
Acinonyx_jubatus	Proteles_cristatus_septentrionalis_NMS_Z_2018_54	0.20132460447473
Acinonyx_jubatus	Puma_concolor	0.094404735547944
Acinonyx_jubatus	Puma_yagouaroundi	0.0967657393086093
Acinonyx_jubatus	Pusa_caspica	0.219252407293145
Acinonyx_jubatus	Pusa_hispida	0.214822272375614
Acinonyx_jubatus	Pusa_sibirica	0.21542792375869
Acinonyx_jubatus	Speothos_venaticus_T1624	0.241791526539076
Acinonyx_jubatus	Spilogale_putorius	0.243462624692334
Acinonyx_jubatus	Taxidea_taxus	0.221968223807158
Acinonyx_jubatus	Tremarctos_ornatus	0.235452035720581
Acinonyx_jubatus	Urocyon_cinereoargenteus	0.245086946433205
Acinonyx_jubatus	Ursus_americanus	0.23304765434824
Acinonyx_jubatus	Ursus_arctos	0.239687525468056
Acinonyx_jubatus	Ursus_maritimus	0.237769793021466
Acinonyx_jubatus	Ursus_spelaeus	0.232272632049575
Acinonyx_jubatus	Ursus_thibetanus	0.233959155787868
Acinonyx_jubatus	Urva_javanica	0.191776515806415
Acinonyx_jubatus	Viverra_tangalunga_FMNH146957_SRR6053069	0.170091327334037
Acinonyx_jubatus	Viverricula_indica	0.17006284633793
Acinonyx_jubatus	Vulpes_corsac	0.2371849473692
Acinonyx_jubatus	Vulpes_ferrilata	0.236420628000453
Acinonyx_jubatus	Vulpes_lagopus	0.239833772974317
Acinonyx_jubatus	Vulpes_vulpes_T3611	0.23150826401804
Acinonyx_jubatus	Vulpes_zerda	0.231496405493461
Acinonyx_jubatus	Zalophus_californianus	0.22974547352249
Ailuropoda_melanoleuca	Ailurus_fulgens	0.232263278615956
Ailuropoda_melanoleuca	Aonyx_cinereus	0.248833793553744
Ailuropoda_melanoleuca	Arctocephalus_forsteri	0.242221345251571
Ailuropoda_melanoleuca	Arctocephalus_pusillus	0.239379459688018
Ailuropoda_melanoleuca	Arctocephalus_townsendi	0.242354459296652
Ailuropoda_melanoleuca	Arctodus_simus	0.191101689538088
Ailuropoda_melanoleuca	Arctonyx_collaris	0.243835781159635
Ailuropoda_melanoleuca	Arctotherium_sp_	0.192065689872458
Ailuropoda_melanoleuca	Bdeogale_nigripes_FMNH167685_SRR6053065	0.249494456583247
Ailuropoda_melanoleuca	Callorhinus_ursinus	0.23371846549306
Ailuropoda_melanoleuca	Canis_anthus	0.248782567232256
Ailuropoda_melanoleuca	Canis_latrans	0.243431317645097
Ailuropoda_melanoleuca	Canis_lupus	0.250039713500152
Ailuropoda_melanoleuca	Caracal_caracal	0.238931495696184
Ailuropoda_melanoleuca	Catopuma_badia	0.236435097967748
Ailuropoda_melanoleuca	Catopuma_temminckii	0.241818373364514
Ailuropoda_melanoleuca	Chrysocyon_brachyurus	0.243009333508702
Ailuropoda_melanoleuca	Civettictis_civetta	0.235503789002343
Ailuropoda_melanoleuca	Conepatus_chinga	0.240485469225531
Ailuropoda_melanoleuca	Crocuta_crocuta	0.256739442963942
Ailuropoda_melanoleuca	Cuon_alpinus	0.250750113886205
Ailuropoda_melanoleuca	Cystophora_cristata	0.218111360471178
Ailuropoda_melanoleuca	Enhydra_lutris	0.238999907474521
Ailuropoda_melanoleuca	Erignathus_barbatus	0.224503609464742
Ailuropoda_melanoleuca	Eumetopias_jubatus	0.241149412362349
Ailuropoda_melanoleuca	Felis_catus	0.240810788864521
Ailuropoda_melanoleuca	Felis_chaus	0.238807699760246
Ailuropoda_melanoleuca	Felis_margarita	0.241645817880483
Ailuropoda_melanoleuca	Felis_nigripes	0.246903684029237
Ailuropoda_melanoleuca	Felis_silvestris	0.239286262939754
Ailuropoda_melanoleuca	Fossa_fossana_FMNH156648_SRR6053060	0.248956902973566
Ailuropoda_melanoleuca	Genetta_servalina	0.231487199740776
Ailuropoda_melanoleuca	Gulo_gulo	0.244492701667125
Ailuropoda_melanoleuca	Halichoerus_grypus	0.226862502497547
Ailuropoda_melanoleuca	Helarctos_malayanus	0.196275571485914
Ailuropoda_melanoleuca	Hyaena_hyaena	0.254412755130234
Ailuropoda_melanoleuca	Hydrurga_leptonyx	0.221143141166593
Ailuropoda_melanoleuca	Leopardus_colocolo	0.243075856819195
Ailuropoda_melanoleuca	Leopardus_geoffroyi	0.240994269256331
Ailuropoda_melanoleuca	Leopardus_guigna	0.240680615145148
Ailuropoda_melanoleuca	Leopardus_jacobita	0.243261467795497
Ailuropoda_melanoleuca	Leopardus_pardalis	0.24112589230978
Ailuropoda_melanoleuca	Leopardus_tigrinus	0.241396826631388
Ailuropoda_melanoleuca	Leopardus_wiedii	0.241013267013662
Ailuropoda_melanoleuca	Leptailurus_serval	0.233492272128156
Ailuropoda_melanoleuca	Leptonychotes_weddellii	0.21632319025665
Ailuropoda_melanoleuca	Lobodon_carcinophaga	0.216517675389875
Ailuropoda_melanoleuca	Lutra_lutra	0.247779671932659
Ailuropoda_melanoleuca	Lutra_sumatrana	0.242984149592209
Ailuropoda_melanoleuca	Lutrogale_perspicillata	0.25364319455647
Ailuropoda_melanoleuca	Lycaon_pictus	0.250354455073444
Ailuropoda_melanoleuca	Lynx_canadensis	0.246650525561469
Ailuropoda_melanoleuca	Lynx_lynx	0.244477852058704
Ailuropoda_melanoleuca	Lynx_pardinus	0.240611054340491
Ailuropoda_melanoleuca	Lynx_rufus	0.242629026001701
Ailuropoda_melanoleuca	Manis_javanica	0.314931370564602
Ailuropoda_melanoleuca	Martes_americana	0.244895517364148
Ailuropoda_melanoleuca	Martes_flavigula	0.245807680356008
Ailuropoda_melanoleuca	Martes_foina	0.244336811939874
Ailuropoda_melanoleuca	Martes_martes	0.247319400144277
Ailuropoda_melanoleuca	Martes_melampus	0.245010091150167
Ailuropoda_melanoleuca	Martes_pennanti	0.246426392012765
Ailuropoda_melanoleuca	Martes_zibellina	0.246701298166529
Ailuropoda_melanoleuca	Meles_anakuma	0.241885372289886
Ailuropoda_melanoleuca	Meles_leucurus	0.240254364222382
Ailuropoda_melanoleuca	Meles_meles	0.240521649699895
Ailuropoda_melanoleuca	Melogale_moschata	0.24753459895044
Ailuropoda_melanoleuca	Melursus_ursinus	0.198484745186704
Ailuropoda_melanoleuca	Mephitis_mephitis	0.241444974282113
Ailuropoda_melanoleuca	Mirounga_leonina	0.221750110228656
Ailuropoda_melanoleuca	Mungotictis_decemlineata	0.253837201374806
Ailuropoda_melanoleuca	Mustela_altaica	0.243601134520161
Ailuropoda_melanoleuca	Mustela_erminea	0.241335862379377
Ailuropoda_melanoleuca	Mustela_eversmannii	0.242798998681817
Ailuropoda_melanoleuca	Mustela_frenata	0.235685272405733
Ailuropoda_melanoleuca	Mustela_itatsi	0.24191274509629
Ailuropoda_melanoleuca	Mustela_kathiah	0.237607874029091
Ailuropoda_melanoleuca	Mustela_nigripes	0.242314890645653
Ailuropoda_melanoleuca	Mustela_nivalis	0.246255704919345
Ailuropoda_melanoleuca	Mustela_putorius	0.240568540071868
Ailuropoda_melanoleuca	Mustela_sibirica	0.244876793421007
Ailuropoda_melanoleuca	Nandinia_binotata	0.236657193690522
Ailuropoda_melanoleuca	Nasua_nasua	0.256023484461948
Ailuropoda_melanoleuca	Neofelis_nebulosa	0.254101926653267
Ailuropoda_melanoleuca	Neomonachus_schauinslandi	0.219245091042183
Ailuropoda_melanoleuca	Neophoca_cinerea	0.243120488112879
Ailuropoda_melanoleuca	Neovison_vison	0.241977595498175
Ailuropoda_melanoleuca	Nyctereutes_procyonoides	0.250258562443175
Ailuropoda_melanoleuca	Odobenus_rosmarus_rosmarus	0.253981116713936
Ailuropoda_melanoleuca	Otocolobus_manul	0.237977551279592
Ailuropoda_melanoleuca	Otocyon_megalotis_megalotis_TS305	0.251411615609621
Ailuropoda_melanoleuca	Otocyon_megalotis_virgatus_FMNH158128	0.252111871850559
Ailuropoda_melanoleuca	Paguma_larvata	0.237146778903835
Ailuropoda_melanoleuca	Panthera_leo	0.245487390263668
Ailuropoda_melanoleuca	Panthera_onca	0.247930261326098
Ailuropoda_melanoleuca	Panthera_pardus	0.245891799022661
Ailuropoda_melanoleuca	Panthera_tigris	0.251203698095122
Ailuropoda_melanoleuca	Panthera_uncia	0.248212439189137
Ailuropoda_melanoleuca	Paradoxurus_hermaphroditus	0.234229415142809
Ailuropoda_melanoleuca	Parahyaena_brunnea_FD126_Fecal	0.252167264921004
Ailuropoda_melanoleuca	Pardofelis_marmorata	0.24356149999499
Ailuropoda_melanoleuca	Phoca_fasciata	0.22152491516908
Ailuropoda_melanoleuca	Phoca_groenlandica	0.21935769563476
Ailuropoda_melanoleuca	Phoca_largha	0.225786394957653
Ailuropoda_melanoleuca	Phoca_vitulina	0.22574717825794
Ailuropoda_melanoleuca	Phocarctos_hookeri	0.247560806992175
Ailuropoda_melanoleuca	Prionailurus_bengalensis	0.238789657662244
Ailuropoda_melanoleuca	Prionailurus_bengalensis_euptilurus	0.241488112604143
Ailuropoda_melanoleuca	Prionailurus_planiceps	0.242156630227116
Ailuropoda_melanoleuca	Prionailurus_rubiginosus	0.24419822808357
Ailuropoda_melanoleuca	Prionailurus_viverrinus	0.241463920491668
Ailuropoda_melanoleuca	Prionodon_pardicolor	0.243194282352688
Ailuropoda_melanoleuca	Procyon_lotor	0.245549050597116
Ailuropoda_melanoleuca	Profelis_aurata	0.244314575755537
Ailuropoda_melanoleuca	Proteles_cristatus_cristatus_TS307	0.256085850326363
Ailuropoda_melanoleuca	Proteles_cristatus_septentrionalis_NMS_Z_2018_54	0.256867571544404
Ailuropoda_melanoleuca	Puma_concolor	0.241461925733242
Ailuropoda_melanoleuca	Puma_yagouaroundi	0.243936111798392
Ailuropoda_melanoleuca	Pusa_caspica	0.230799877000653
Ailuropoda_melanoleuca	Pusa_hispida	0.223632250553136
Ailuropoda_melanoleuca	Pusa_sibirica	0.228274479778495
Ailuropoda_melanoleuca	Speothos_venaticus_T1624	0.247749665046275
Ailuropoda_melanoleuca	Spilogale_putorius	0.244054592832145
Ailuropoda_melanoleuca	Taxidea_taxus	0.23613582536361
Ailuropoda_melanoleuca	Tremarctos_ornatus	0.193587643643118
Ailuropoda_melanoleuca	Urocyon_cinereoargenteus	0.255017214174943
Ailuropoda_melanoleuca	Ursus_americanus	0.199687720395171
Ailuropoda_melanoleuca	Ursus_arctos	0.199325095084287
Ailuropoda_melanoleuca	Ursus_maritimus	0.199151397449409
Ailuropoda_melanoleuca	Ursus_spelaeus	0.197850378023712
Ailuropoda_melanoleuca	Ursus_thibetanus	0.194909833717334
Ailuropoda_melanoleuca	Urva_javanica	0.247575963064872
Ailuropoda_melanoleuca	Viverra_tangalunga_FMNH146957_SRR6053069	0.234277204979536
Ailuropoda_melanoleuca	Viverricula_indica	0.233088139945995
Ailuropoda_melanoleuca	Vulpes_corsac	0.247963564646517
Ailuropoda_melanoleuca	Vulpes_ferrilata	0.249990202098951
Ailuropoda_melanoleuca	Vulpes_lagopus	0.256368926798153
Ailuropoda_melanoleuca	Vulpes_vulpes_T3611	0.249712872572395
Ailuropoda_melanoleuca	Vulpes_zerda	0.253438395379207
Ailuropoda_melanoleuca	Zalophus_californianus	0.237300627227397
Ailurus_fulgens	Aonyx_cinereus	0.230652205658395
Ailurus_fulgens	Arctocephalus_forsteri	0.232849390610146
Ailurus_fulgens	Arctocephalus_pusillus	0.230012051606305
Ailurus_fulgens	Arctocephalus_townsendi	0.234302254819627
Ailurus_fulgens	Arctodus_simus	0.231236092266674
Ailurus_fulgens	Arctonyx_collaris	0.217766812898886
Ailurus_fulgens	Arctotherium_sp_	0.229893261345921
Ailurus_fulgens	Bdeogale_nigripes_FMNH167685_SRR6053065	0.24493016208697
Ailurus_fulgens	Callorhinus_ursinus	0.231066658916549
Ailurus_fulgens	Canis_anthus	0.249848735901223
Ailurus_fulgens	Canis_latrans	0.246553823406005
Ailurus_fulgens	Canis_lupus	0.243354671535355
Ailurus_fulgens	Caracal_caracal	0.237147572463336
Ailurus_fulgens	Catopuma_badia	0.234689393722043
Ailurus_fulgens	Catopuma_temminckii	0.233713645432943
Ailurus_fulgens	Chrysocyon_brachyurus	0.240279604479558
Ailurus_fulgens	Civettictis_civetta	0.234969189794133
Ailurus_fulgens	Conepatus_chinga	0.234209343331612
Ailurus_fulgens	Crocuta_crocuta	0.252915115851182
Ailurus_fulgens	Cuon_alpinus	0.245224556971083
Ailurus_fulgens	Cystophora_cristata	0.220717185172626
Ailurus_fulgens	Enhydra_lutris	0.221653131772315
Ailurus_fulgens	Erignathus_barbatus	0.216263325582035
Ailurus_fulgens	Eumetopias_jubatus	0.224786652601139
Ailurus_fulgens	Felis_catus	0.232663971583998
Ailurus_fulgens	Felis_chaus	0.232033638889217
Ailurus_fulgens	Felis_margarita	0.231073219289615
Ailurus_fulgens	Felis_nigripes	0.233735515145842
Ailurus_fulgens	Felis_silvestris	0.231845079625939
Ailurus_fulgens	Fossa_fossana_FMNH156648_SRR6053060	0.240530137474573
Ailurus_fulgens	Genetta_servalina	0.2340679619666
Ailurus_fulgens	Gulo_gulo	0.222879899114054
Ailurus_fulgens	Halichoerus_grypus	0.221203555376435
Ailurus_fulgens	Helarctos_malayanus	0.234996752708677
Ailurus_fulgens	Hyaena_hyaena	0.248960470198965
Ailurus_fulgens	Hydrurga_leptonyx	0.210891834555134
Ailurus_fulgens	Leopardus_colocolo	0.234490977325743
Ailurus_fulgens	Leopardus_geoffroyi	0.235411381513984
Ailurus_fulgens	Leopardus_guigna	0.237169128526589
Ailurus_fulgens	Leopardus_jacobita	0.233648373269666
Ailurus_fulgens	Leopardus_pardalis	0.236691963866762
Ailurus_fulgens	Leopardus_tigrinus	0.233815653991127
Ailurus_fulgens	Leopardus_wiedii	0.235333425794588
Ailurus_fulgens	Leptailurus_serval	0.22998980651688
Ailurus_fulgens	Leptonychotes_weddellii	0.211072529585694
Ailurus_fulgens	Lobodon_carcinophaga	0.210169199355087
Ailurus_fulgens	Lutra_lutra	0.230493287351274
Ailurus_fulgens	Lutra_sumatrana	0.22677343131084
Ailurus_fulgens	Lutrogale_perspicillata	0.238629148062772
Ailurus_fulgens	Lycaon_pictus	0.242726268972241
Ailurus_fulgens	Lynx_canadensis	0.238590983128999
Ailurus_fulgens	Lynx_lynx	0.239012362367425
Ailurus_fulgens	Lynx_pardinus	0.239908319601229
Ailurus_fulgens	Lynx_rufus	0.237102527140662
Ailurus_fulgens	Manis_javanica	0.304640193113998
Ailurus_fulgens	Martes_americana	0.227946981917736
Ailurus_fulgens	Martes_flavigula	0.226552829052738
Ailurus_fulgens	Martes_foina	0.223981864588202
Ailurus_fulgens	Martes_martes	0.230905556969352
Ailurus_fulgens	Martes_melampus	0.226245226253714
Ailurus_fulgens	Martes_pennanti	0.231852700253445
Ailurus_fulgens	Martes_zibellina	0.229794694616574
Ailurus_fulgens	Meles_anakuma	0.221238961973733
Ailurus_fulgens	Meles_leucurus	0.217632831721645
Ailurus_fulgens	Meles_meles	0.217093682006107
Ailurus_fulgens	Melogale_moschata	0.229534137213971
Ailurus_fulgens	Melursus_ursinus	0.239627950319028
Ailurus_fulgens	Mephitis_mephitis	0.233022786293018
Ailurus_fulgens	Mirounga_leonina	0.211233269953164
Ailurus_fulgens	Mungotictis_decemlineata	0.244661055377943
Ailurus_fulgens	Mustela_altaica	0.223029478786132
Ailurus_fulgens	Mustela_erminea	0.21690428644236
Ailurus_fulgens	Mustela_eversmannii	0.225726454050963
Ailurus_fulgens	Mustela_frenata	0.220691316793025
Ailurus_fulgens	Mustela_itatsi	0.223358534408407
Ailurus_fulgens	Mustela_kathiah	0.225659161024507
Ailurus_fulgens	Mustela_nigripes	0.224590023109803
Ailurus_fulgens	Mustela_nivalis	0.221681814597339
Ailurus_fulgens	Mustela_putorius	0.224219494441957
Ailurus_fulgens	Mustela_sibirica	0.225970605595031
Ailurus_fulgens	Nandinia_binotata	0.227700098196426
Ailurus_fulgens	Nasua_nasua	0.248523110732208
Ailurus_fulgens	Neofelis_nebulosa	0.248542351117833
Ailurus_fulgens	Neomonachus_schauinslandi	0.211523894315403
Ailurus_fulgens	Neophoca_cinerea	0.232338803840724
Ailurus_fulgens	Neovison_vison	0.220659199302519
Ailurus_fulgens	Nyctereutes_procyonoides	0.25083272013193
Ailurus_fulgens	Odobenus_rosmarus_rosmarus	0.2420621731372
Ailurus_fulgens	Otocolobus_manul	0.233030876270038
Ailurus_fulgens	Otocyon_megalotis_megalotis_TS305	0.257265226046281
Ailurus_fulgens	Otocyon_megalotis_virgatus_FMNH158128	0.256649538358509
Ailurus_fulgens	Paguma_larvata	0.231346235097548
Ailurus_fulgens	Panthera_leo	0.240026935228721
Ailurus_fulgens	Panthera_onca	0.245143131491488
Ailurus_fulgens	Panthera_pardus	0.240720210146084
Ailurus_fulgens	Panthera_tigris	0.244417333640413
Ailurus_fulgens	Panthera_uncia	0.246918869497689
Ailurus_fulgens	Paradoxurus_hermaphroditus	0.23319356914037
Ailurus_fulgens	Parahyaena_brunnea_FD126_Fecal	0.250363064027515
Ailurus_fulgens	Pardofelis_marmorata	0.241878881276906
Ailurus_fulgens	Phoca_fasciata	0.215622704916077
Ailurus_fulgens	Phoca_groenlandica	0.217278948339794
Ailurus_fulgens	Phoca_largha	0.21979387529157
Ailurus_fulgens	Phoca_vitulina	0.219626448904736
Ailurus_fulgens	Phocarctos_hookeri	0.236595955536631
Ailurus_fulgens	Prionailurus_bengalensis	0.231041356314369
Ailurus_fulgens	Prionailurus_bengalensis_euptilurus	0.229590669274212
Ailurus_fulgens	Prionailurus_planiceps	0.236935155062588
Ailurus_fulgens	Prionailurus_rubiginosus	0.233893988850468
Ailurus_fulgens	Prionailurus_viverrinus	0.231020184213207
Ailurus_fulgens	Prionodon_pardicolor	0.245469430624016
Ailurus_fulgens	Procyon_lotor	0.234769127460683
Ailurus_fulgens	Profelis_aurata	0.235067114184851
Ailurus_fulgens	Proteles_cristatus_cristatus_TS307	0.256314770774091
Ailurus_fulgens	Proteles_cristatus_septentrionalis_NMS_Z_2018_54	0.258964546560961
Ailurus_fulgens	Puma_concolor	0.235433448034273
Ailurus_fulgens	Puma_yagouaroundi	0.229724144650564
Ailurus_fulgens	Pusa_caspica	0.218949376746173
Ailurus_fulgens	Pusa_hispida	0.21630876843134
Ailurus_fulgens	Pusa_sibirica	0.220287151523975
Ailurus_fulgens	Speothos_venaticus_T1624	0.245390332819439
Ailurus_fulgens	Spilogale_putorius	0.229767527782166
Ailurus_fulgens	Taxidea_taxus	0.215863936375449
Ailurus_fulgens	Tremarctos_ornatus	0.237234169957692
Ailurus_fulgens	Urocyon_cinereoargenteus	0.258305759068051
Ailurus_fulgens	Ursus_americanus	0.231213445842017
Ailurus_fulgens	Ursus_arctos	0.235999695410885
Ailurus_fulgens	Ursus_maritimus	0.237831812161089
Ailurus_fulgens	Ursus_spelaeus	0.233948652548405
Ailurus_fulgens	Ursus_thibetanus	0.234113819782412
Ailurus_fulgens	Urva_javanica	0.245909331165258
Ailurus_fulgens	Viverra_tangalunga_FMNH146957_SRR6053069	0.231208746729626
Ailurus_fulgens	Viverricula_indica	0.230936055124238
Ailurus_fulgens	Vulpes_corsac	0.254196500098939
Ailurus_fulgens	Vulpes_ferrilata	0.256027429699717
Ailurus_fulgens	Vulpes_lagopus	0.257729989059454
Ailurus_fulgens	Vulpes_vulpes_T3611	0.255264393232293
Ailurus_fulgens	Vulpes_zerda	0.25533801214823
Ailurus_fulgens	Zalophus_californianus	0.22719479425592
Aonyx_cinereus	Arctocephalus_forsteri	0.237834505573667
Aonyx_cinereus	Arctocephalus_pusillus	0.231709025242604
Aonyx_cinereus	Arctocephalus_townsendi	0.235294418626602
Aonyx_cinereus	Arctodus_simus	0.23254550179107
Aonyx_cinereus	Arctonyx_collaris	0.181365921830473
Aonyx_cinereus	Arctotherium_sp_	0.238452794449654
Aonyx_cinereus	Bdeogale_nigripes_FMNH167685_SRR6053065	0.245112314603442
Aonyx_cinereus	Callorhinus_ursinus	0.229302782357131
Aonyx_cinereus	Canis_anthus	0.253305441303959
Aonyx_cinereus	Canis_latrans	0.253066979671233
Aonyx_cinereus	Canis_lupus	0.246106647785009
Aonyx_cinereus	Caracal_caracal	0.234490977325743
Aonyx_cinereus	Catopuma_badia	0.234261485584984
Aonyx_cinereus	Catopuma_temminckii	0.238641176922012
Aonyx_cinereus	Chrysocyon_brachyurus	0.252466042245563
Aonyx_cinereus	Civettictis_civetta	0.234804368648929
Aonyx_cinereus	Conepatus_chinga	0.245803977303309
Aonyx_cinereus	Crocuta_crocuta	0.241638578072702
Aonyx_cinereus	Cuon_alpinus	0.258023239327359
Aonyx_cinereus	Cystophora_cristata	0.214838420346331
Aonyx_cinereus	Enhydra_lutris	0.141807496382441
Aonyx_cinereus	Erignathus_barbatus	0.219761546408901
Aonyx_cinereus	Eumetopias_jubatus	0.230583464552691
Aonyx_cinereus	Felis_catus	0.232861616410153
Aonyx_cinereus	Felis_chaus	0.239825754004412
Aonyx_cinereus	Felis_margarita	0.23200083983456
Aonyx_cinereus	Felis_nigripes	0.236456631788638
Aonyx_cinereus	Felis_silvestris	0.231251246179058
Aonyx_cinereus	Fossa_fossana_FMNH156648_SRR6053060	0.232993609477282
Aonyx_cinereus	Genetta_servalina	0.236793545741667
Aonyx_cinereus	Gulo_gulo	0.178098811215985
Aonyx_cinereus	Halichoerus_grypus	0.216873193342062
Aonyx_cinereus	Helarctos_malayanus	0.243193434992212
Aonyx_cinereus	Hyaena_hyaena	0.23803862451977
Aonyx_cinereus	Hydrurga_leptonyx	0.212934704118024
Aonyx_cinereus	Leopardus_colocolo	0.231303123951947
Aonyx_cinereus	Leopardus_geoffroyi	0.23173926866657
Aonyx_cinereus	Leopardus_guigna	0.233129832797078
Aonyx_cinereus	Leopardus_jacobita	0.231591663025078
Aonyx_cinereus	Leopardus_pardalis	0.227308354985242
Aonyx_cinereus	Leopardus_tigrinus	0.234897595106942
Aonyx_cinereus	Leopardus_wiedii	0.229895243758958
Aonyx_cinereus	Leptailurus_serval	0.233559381544956
Aonyx_cinereus	Leptonychotes_weddellii	0.210225569346893
Aonyx_cinereus	Lobodon_carcinophaga	0.208141427762798
Aonyx_cinereus	Lutra_lutra	0.122405163679129
Aonyx_cinereus	Lutra_sumatrana	0.11968163285306
Aonyx_cinereus	Lutrogale_perspicillata	0.0676202558717779
Aonyx_cinereus	Lycaon_pictus	0.248395507701558
Aonyx_cinereus	Lynx_canadensis	0.231806465409516
Aonyx_cinereus	Lynx_lynx	0.233644802088657
Aonyx_cinereus	Lynx_pardinus	0.235437050382124
Aonyx_cinereus	Lynx_rufus	0.236757225369924
Aonyx_cinereus	Manis_javanica	0.29227508623858
Aonyx_cinereus	Martes_americana	0.172925244058687
Aonyx_cinereus	Martes_flavigula	0.174001008152506
Aonyx_cinereus	Martes_foina	0.170837912776295
Aonyx_cinereus	Martes_martes	0.17394002286992
Aonyx_cinereus	Martes_melampus	0.173697062017651
Aonyx_cinereus	Martes_pennanti	0.178713787892323
Aonyx_cinereus	Martes_zibellina	0.175301890440439
Aonyx_cinereus	Meles_anakuma	0.184385955147595
Aonyx_cinereus	Meles_leucurus	0.180854194909167
Aonyx_cinereus	Meles_meles	0.180049664265676
Aonyx_cinereus	Melogale_moschata	0.170554639950877
Aonyx_cinereus	Melursus_ursinus	0.23976589971758
Aonyx_cinereus	Mephitis_mephitis	0.245324778414503
Aonyx_cinereus	Mirounga_leonina	0.220425352941973
Aonyx_cinereus	Mungotictis_decemlineata	0.236585600566486
Aonyx_cinereus	Mustela_altaica	0.172131440350322
Aonyx_cinereus	Mustela_erminea	0.157848212977013
Aonyx_cinereus	Mustela_eversmannii	0.171300208854939
Aonyx_cinereus	Mustela_frenata	0.170998699909481
Aonyx_cinereus	Mustela_itatsi	0.174024869234759
Aonyx_cinereus	Mustela_kathiah	0.174657225245821
Aonyx_cinereus	Mustela_nigripes	0.173038435720038
Aonyx_cinereus	Mustela_nivalis	0.172042250713556
Aonyx_cinereus	Mustela_putorius	0.171597364212966
Aonyx_cinereus	Mustela_sibirica	0.171116990862799
Aonyx_cinereus	Nandinia_binotata	0.224469293232412
Aonyx_cinereus	Nasua_nasua	0.239810999801982
Aonyx_cinereus	Neofelis_nebulosa	0.242883367409512
Aonyx_cinereus	Neomonachus_schauinslandi	0.22109016934242
Aonyx_cinereus	Neophoca_cinerea	0.235117662101343
Aonyx_cinereus	Neovison_vison	0.176074984520443
Aonyx_cinereus	Nyctereutes_procyonoides	0.250218623638802
Aonyx_cinereus	Odobenus_rosmarus_rosmarus	0.250032613889804
Aonyx_cinereus	Otocolobus_manul	0.236324952946199
Aonyx_cinereus	Otocyon_megalotis_megalotis_TS305	0.252258143219789
Aonyx_cinereus	Otocyon_megalotis_virgatus_FMNH158128	0.252899238536227
Aonyx_cinereus	Paguma_larvata	0.247087630511177
Aonyx_cinereus	Panthera_leo	0.2386298445545
Aonyx_cinereus	Panthera_onca	0.235666852083877
Aonyx_cinereus	Panthera_pardus	0.240663884216326
Aonyx_cinereus	Panthera_tigris	0.24311267184833
Aonyx_cinereus	Panthera_uncia	0.238630951765334
Aonyx_cinereus	Paradoxurus_hermaphroditus	0.252489474807817
Aonyx_cinereus	Parahyaena_brunnea_FD126_Fecal	0.238616089994326
Aonyx_cinereus	Pardofelis_marmorata	0.23957940778779
Aonyx_cinereus	Phoca_fasciata	0.213866353446847
Aonyx_cinereus	Phoca_groenlandica	0.217092070261481
Aonyx_cinereus	Phoca_largha	0.215338930329933
Aonyx_cinereus	Phoca_vitulina	0.216712006459752
Aonyx_cinereus	Phocarctos_hookeri	0.234948807146014
Aonyx_cinereus	Prionailurus_bengalensis	0.233619219413519
Aonyx_cinereus	Prionailurus_bengalensis_euptilurus	0.234326006820866
Aonyx_cinereus	Prionailurus_planiceps	0.2310565696254
Aonyx_cinereus	Prionailurus_rubiginosus	0.232747338794275
Aonyx_cinereus	Prionailurus_viverrinus	0.237147176169791
Aonyx_cinereus	Prionodon_pardicolor	0.247295040722384
Aonyx_cinereus	Procyon_lotor	0.224084717575246
Aonyx_cinereus	Profelis_aurata	0.240032006478527
Aonyx_cinereus	Proteles_cristatus_cristatus_TS307	0.242095943456831
Aonyx_cinereus	Proteles_cristatus_septentrionalis_NMS_Z_2018_54	0.245009443408288
Aonyx_cinereus	Puma_concolor	0.234804368648929
Aonyx_cinereus	Puma_yagouaroundi	0.237002885755315
Aonyx_cinereus	Pusa_caspica	0.216568338819747
Aonyx_cinereus	Pusa_hispida	0.213718584515162
Aonyx_cinereus	Pusa_sibirica	0.214991073938477
Aonyx_cinereus	Speothos_venaticus_T1624	0.262075395278812
Aonyx_cinereus	Spilogale_putorius	0.248716067345673
Aonyx_cinereus	Taxidea_taxus	0.181661019990774
Aonyx_cinereus	Tremarctos_ornatus	0.23856643081378
Aonyx_cinereus	Urocyon_cinereoargenteus	0.25980803133657
Aonyx_cinereus	Ursus_americanus	0.24190283612445
Aonyx_cinereus	Ursus_arctos	0.242033167205761
Aonyx_cinereus	Ursus_maritimus	0.243191743883846
Aonyx_cinereus	Ursus_spelaeus	0.236842592756277
Aonyx_cinereus	Ursus_thibetanus	0.241187220770341
Aonyx_cinereus	Urva_javanica	0.245101714520134
Aonyx_cinereus	Viverra_tangalunga_FMNH146957_SRR6053069	0.237739983715789
Aonyx_cinereus	Viverricula_indica	0.236195311175556
Aonyx_cinereus	Vulpes_corsac	0.250261367925842
Aonyx_cinereus	Vulpes_ferrilata	0.252291973155621
Aonyx_cinereus	Vulpes_lagopus	0.253955320812408
Aonyx_cinereus	Vulpes_vulpes_T3611	0.248483789212883
Aonyx_cinereus	Vulpes_zerda	0.248641393866553
Aonyx_cinereus	Zalophus_californianus	0.231576004182548
Arctocephalus_forsteri	Arctocephalus_pusillus	0.075282829749243
Arctocephalus_forsteri	Arctocephalus_townsendi	0.0585238972905729
Arctocephalus_forsteri	Arctodus_simus	0.22998106461803
Arctocephalus_forsteri	Arctonyx_collaris	0.229649104514212
Arctocephalus_forsteri	Arctotherium_sp_	0.231832652379089
Arctocephalus_forsteri	Bdeogale_nigripes_FMNH167685_SRR6053065	0.239059333081604
Arctocephalus_forsteri	Callorhinus_ursinus	0.11994573688442
Arctocephalus_forsteri	Canis_anthus	0.251746613594979
Arctocephalus_forsteri	Canis_latrans	0.252145760697421
Arctocephalus_forsteri	Canis_lupus	0.252780966904772
Arctocephalus_forsteri	Caracal_caracal	0.238070067993772
Arctocephalus_forsteri	Catopuma_badia	0.238752661084428
Arctocephalus_forsteri	Catopuma_temminckii	0.239775890689084
Arctocephalus_forsteri	Chrysocyon_brachyurus	0.250907494076302
Arctocephalus_forsteri	Civettictis_civetta	0.238540896101673
Arctocephalus_forsteri	Conepatus_chinga	0.241925394101626
Arctocephalus_forsteri	Crocuta_crocuta	0.246186661919678
Arctocephalus_forsteri	Cuon_alpinus	0.255153329588481
Arctocephalus_forsteri	Cystophora_cristata	0.188930046307461
Arctocephalus_forsteri	Enhydra_lutris	0.237441331859527
Arctocephalus_forsteri	Erignathus_barbatus	0.181352694409384
Arctocephalus_forsteri	Eumetopias_jubatus	0.0857646053418883
Arctocephalus_forsteri	Felis_catus	0.240236802992497
Arctocephalus_forsteri	Felis_chaus	0.240805144207583
Arctocephalus_forsteri	Felis_margarita	0.238324706313287
Arctocephalus_forsteri	Felis_nigripes	0.241677032322216
Arctocephalus_forsteri	Felis_silvestris	0.238720930315952
Arctocephalus_forsteri	Fossa_fossana_FMNH156648_SRR6053060	0.232601501507952
Arctocephalus_forsteri	Genetta_servalina	0.239584917065133
Arctocephalus_forsteri	Gulo_gulo	0.231492177881856
Arctocephalus_forsteri	Halichoerus_grypus	0.191205887979883
Arctocephalus_forsteri	Helarctos_malayanus	0.232384048934041
Arctocephalus_forsteri	Hyaena_hyaena	0.246973975095512
Arctocephalus_forsteri	Hydrurga_leptonyx	0.180086460826262
Arctocephalus_forsteri	Leopardus_colocolo	0.240221871318497
Arctocephalus_forsteri	Leopardus_geoffroyi	0.233734152670872
Arctocephalus_forsteri	Leopardus_guigna	0.235962933900384
Arctocephalus_forsteri	Leopardus_jacobita	0.237879756497846
Arctocephalus_forsteri	Leopardus_pardalis	0.234688150067633
Arctocephalus_forsteri	Leopardus_tigrinus	0.234796021515742
Arctocephalus_forsteri	Leopardus_wiedii	0.233315826629821
Arctocephalus_forsteri	Leptailurus_serval	0.239358974396438
Arctocephalus_forsteri	Leptonychotes_weddellii	0.17896277614654
Arctocephalus_forsteri	Lobodon_carcinophaga	0.178300304431157
Arctocephalus_forsteri	Lutra_lutra	0.235710055684387
Arctocephalus_forsteri	Lutra_sumatrana	0.232387473961735
Arctocephalus_forsteri	Lutrogale_perspicillata	0.24131847268946
Arctocephalus_forsteri	Lycaon_pictus	0.250398929731599
Arctocephalus_forsteri	Lynx_canadensis	0.235745965070948
Arctocephalus_forsteri	Lynx_lynx	0.234881795306332
Arctocephalus_forsteri	Lynx_pardinus	0.232936756420691
Arctocephalus_forsteri	Lynx_rufus	0.236025628717343
Arctocephalus_forsteri	Manis_javanica	0.286855776048252
Arctocephalus_forsteri	Martes_americana	0.233690593586072
Arctocephalus_forsteri	Martes_flavigula	0.231274346822713
Arctocephalus_forsteri	Martes_foina	0.232701354829643
Arctocephalus_forsteri	Martes_martes	0.231660392164191
Arctocephalus_forsteri	Martes_melampus	0.23315755079929
Arctocephalus_forsteri	Martes_pennanti	0.236350039567666
Arctocephalus_forsteri	Martes_zibellina	0.233872106010338
Arctocephalus_forsteri	Meles_anakuma	0.23774240760337
Arctocephalus_forsteri	Meles_leucurus	0.233569471546458
Arctocephalus_forsteri	Meles_meles	0.231553641357977
Arctocephalus_forsteri	Melogale_moschata	0.239679079594717
Arctocephalus_forsteri	Melursus_ursinus	0.237320549455458
Arctocephalus_forsteri	Mephitis_mephitis	0.24326832632573
Arctocephalus_forsteri	Mirounga_leonina	0.182550555069499
Arctocephalus_forsteri	Mungotictis_decemlineata	0.242897058908415
Arctocephalus_forsteri	Mustela_altaica	0.239989584496938
Arctocephalus_forsteri	Mustela_erminea	0.231113236525694
Arctocephalus_forsteri	Mustela_eversmannii	0.242766194896679
Arctocephalus_forsteri	Mustela_frenata	0.23024213709183
Arctocephalus_forsteri	Mustela_itatsi	0.239765268656477
Arctocephalus_forsteri	Mustela_kathiah	0.237705421455711
Arctocephalus_forsteri	Mustela_nigripes	0.240883239586471
Arctocephalus_forsteri	Mustela_nivalis	0.240621141967789
Arctocephalus_forsteri	Mustela_putorius	0.239606777063122
Arctocephalus_forsteri	Mustela_sibirica	0.239693163417387
Arctocephalus_forsteri	Nandinia_binotata	0.22837022099111
Arctocephalus_forsteri	Nasua_nasua	0.243846820676561
Arctocephalus_forsteri	Neofelis_nebulosa	0.251214545992476
Arctocephalus_forsteri	Neomonachus_schauinslandi	0.184718762653607
Arctocephalus_forsteri	Neophoca_cinerea	0.0731676040288147
Arctocephalus_forsteri	Neovison_vison	0.232960664426236
Arctocephalus_forsteri	Nyctereutes_procyonoides	0.242855609667584
Arctocephalus_forsteri	Odobenus_rosmarus_rosmarus	0.197109973756599
Arctocephalus_forsteri	Otocolobus_manul	0.234965831118517
Arctocephalus_forsteri	Otocyon_megalotis_megalotis_TS305	0.248392140445258
Arctocephalus_forsteri	Otocyon_megalotis_virgatus_FMNH158128	0.249704952163157
Arctocephalus_forsteri	Paguma_larvata	0.24342768878181
Arctocephalus_forsteri	Panthera_leo	0.246835190760218
Arctocephalus_forsteri	Panthera_onca	0.245853318642676
Arctocephalus_forsteri	Panthera_pardus	0.249441428955758
Arctocephalus_forsteri	Panthera_tigris	0.245664472288459
Arctocephalus_forsteri	Panthera_uncia	0.24876022994031
Arctocephalus_forsteri	Paradoxurus_hermaphroditus	0.243533241018101
Arctocephalus_forsteri	Parahyaena_brunnea_FD126_Fecal	0.242984535546528
Arctocephalus_forsteri	Pardofelis_marmorata	0.242861902689016
Arctocephalus_forsteri	Phoca_fasciata	0.183625968728622
Arctocephalus_forsteri	Phoca_groenlandica	0.188707028971742
Arctocephalus_forsteri	Phoca_largha	0.190173655407983
Arctocephalus_forsteri	Phoca_vitulina	0.191302249889837
Arctocephalus_forsteri	Phocarctos_hookeri	0.0782294239287658
Arctocephalus_forsteri	Prionailurus_bengalensis	0.238234657234004
Arctocephalus_forsteri	Prionailurus_bengalensis_euptilurus	0.237303282946862
Arctocephalus_forsteri	Prionailurus_planiceps	0.234234439753299
Arctocephalus_forsteri	Prionailurus_rubiginosus	0.235579366999005
Arctocephalus_forsteri	Prionailurus_viverrinus	0.240777346241023
Arctocephalus_forsteri	Prionodon_pardicolor	0.247824541133215
Arctocephalus_forsteri	Procyon_lotor	0.240403567218753
Arctocephalus_forsteri	Profelis_aurata	0.24436681762997
Arctocephalus_forsteri	Proteles_cristatus_cristatus_TS307	0.248028186974438
Arctocephalus_forsteri	Proteles_cristatus_septentrionalis_NMS_Z_2018_54	0.249177569357676
Arctocephalus_forsteri	Puma_concolor	0.238292389029005
Arctocephalus_forsteri	Puma_yagouaroundi	0.241511421024629
Arctocephalus_forsteri	Pusa_caspica	0.190020418131331
Arctocephalus_forsteri	Pusa_hispida	0.187969953972515
Arctocephalus_forsteri	Pusa_sibirica	0.188835793828858
Arctocephalus_forsteri	Speothos_venaticus_T1624	0.257452721199566
Arctocephalus_forsteri	Spilogale_putorius	0.246405897332844
Arctocephalus_forsteri	Taxidea_taxus	0.223706905683243
Arctocephalus_forsteri	Tremarctos_ornatus	0.23557460144274
Arctocephalus_forsteri	Urocyon_cinereoargenteus	0.253320284636788
Arctocephalus_forsteri	Ursus_americanus	0.233178193346933
Arctocephalus_forsteri	Ursus_arctos	0.24367992581801
Arctocephalus_forsteri	Ursus_maritimus	0.242663260816803
Arctocephalus_forsteri	Ursus_spelaeus	0.2362042966547
Arctocephalus_forsteri	Ursus_thibetanus	0.235752319222793
Arctocephalus_forsteri	Urva_javanica	0.240599995830182
Arctocephalus_forsteri	Viverra_tangalunga_FMNH146957_SRR6053069	0.236301958556644
Arctocephalus_forsteri	Viverricula_indica	0.240629405435598
Arctocephalus_forsteri	Vulpes_corsac	0.249756866438811
Arctocephalus_forsteri	Vulpes_ferrilata	0.253213252596682
Arctocephalus_forsteri	Vulpes_lagopus	0.251874077574962
Arctocephalus_forsteri	Vulpes_vulpes_T3611	0.247711953877617
Arctocephalus_forsteri	Vulpes_zerda	0.249400789384897
Arctocephalus_forsteri	Zalophus_californianus	0.0816899532945693
Arctocephalus_pusillus	Arctocephalus_townsendi	0.0758766917298973
Arctocephalus_pusillus	Arctodus_simus	0.22680010375149
Arctocephalus_pusillus	Arctonyx_collaris	0.228352136288586
Arctocephalus_pusillus	Arctotherium_sp_	0.231884975530894
Arctocephalus_pusillus	Bdeogale_nigripes_FMNH167685_SRR6053065	0.236302378588888
Arctocephalus_pusillus	Callorhinus_ursinus	0.118278926137065
Arctocephalus_pusillus	Canis_anthus	0.247229739002938
Arctocephalus_pusillus	Canis_latrans	0.245299105250385
Arctocephalus_pusillus	Canis_lupus	0.245087580028085
Arctocephalus_pusillus	Caracal_caracal	0.23193509821737
Arctocephalus_pusillus	Catopuma_badia	0.232834201568839
Arctocephalus_pusillus	Catopuma_temminckii	0.236713707099199
Arctocephalus_pusillus	Chrysocyon_brachyurus	0.252679634401514
Arctocephalus_pusillus	Civettictis_civetta	0.234284445543932
Arctocephalus_pusillus	Conepatus_chinga	0.233251895170753
Arctocephalus_pusillus	Crocuta_crocuta	0.240306167699748
Arctocephalus_pusillus	Cuon_alpinus	0.25100964855941
Arctocephalus_pusillus	Cystophora_cristata	0.185861599787296
Arctocephalus_pusillus	Enhydra_lutris	0.232620867422667
Arctocephalus_pusillus	Erignathus_barbatus	0.180636729108402
Arctocephalus_pusillus	Eumetopias_jubatus	0.0816390246622461
Arctocephalus_pusillus	Felis_catus	0.235246188199005
Arctocephalus_pusillus	Felis_chaus	0.23766944101316
Arctocephalus_pusillus	Felis_margarita	0.233773952213167
Arctocephalus_pusillus	Felis_nigripes	0.234354145410135
Arctocephalus_pusillus	Felis_silvestris	0.233943700991801
Arctocephalus_pusillus	Fossa_fossana_FMNH156648_SRR6053060	0.230396921440147
Arctocephalus_pusillus	Genetta_servalina	0.235647160548463
Arctocephalus_pusillus	Gulo_gulo	0.23193573524073
Arctocephalus_pusillus	Halichoerus_grypus	0.185353699874781
Arctocephalus_pusillus	Helarctos_malayanus	0.228191798203351
Arctocephalus_pusillus	Hyaena_hyaena	0.241084551043873
Arctocephalus_pusillus	Hydrurga_leptonyx	0.17789608643734
Arctocephalus_pusillus	Leopardus_colocolo	0.23366355862655
Arctocephalus_pusillus	Leopardus_geoffroyi	0.232064652855975
Arctocephalus_pusillus	Leopardus_guigna	0.232064652855975
Arctocephalus_pusillus	Leopardus_jacobita	0.234536564953351
Arctocephalus_pusillus	Leopardus_pardalis	0.228195289553435
Arctocephalus_pusillus	Leopardus_tigrinus	0.230381949903953
Arctocephalus_pusillus	Leopardus_wiedii	0.227163652589839
Arctocephalus_pusillus	Leptailurus_serval	0.229874068848194
Arctocephalus_pusillus	Leptonychotes_weddellii	0.172389139964522
Arctocephalus_pusillus	Lobodon_carcinophaga	0.176219387183703
Arctocephalus_pusillus	Lutra_lutra	0.230836569871257
Arctocephalus_pusillus	Lutra_sumatrana	0.23017336650222
Arctocephalus_pusillus	Lutrogale_perspicillata	0.23628591206685
Arctocephalus_pusillus	Lycaon_pictus	0.245696924657954
Arctocephalus_pusillus	Lynx_canadensis	0.232614480614995
Arctocephalus_pusillus	Lynx_lynx	0.232044680973746
Arctocephalus_pusillus	Lynx_pardinus	0.229821802721719
Arctocephalus_pusillus	Lynx_rufus	0.231884877567329
Arctocephalus_pusillus	Manis_javanica	0.283793918246429
Arctocephalus_pusillus	Martes_americana	0.232888949555598
Arctocephalus_pusillus	Martes_flavigula	0.229302663386898
Arctocephalus_pusillus	Martes_foina	0.230904254366668
Arctocephalus_pusillus	Martes_martes	0.229424278344033
Arctocephalus_pusillus	Martes_melampus	0.22784776638556
Arctocephalus_pusillus	Martes_pennanti	0.234536244475112
Arctocephalus_pusillus	Martes_zibellina	0.230739604798136
Arctocephalus_pusillus	Meles_anakuma	0.231853450639448
Arctocephalus_pusillus	Meles_leucurus	0.227700269869262
Arctocephalus_pusillus	Meles_meles	0.228709702782675
Arctocephalus_pusillus	Melogale_moschata	0.236398245110533
Arctocephalus_pusillus	Melursus_ursinus	0.234717577148485
Arctocephalus_pusillus	Mephitis_mephitis	0.239992668095835
Arctocephalus_pusillus	Mirounga_leonina	0.178925849882857
Arctocephalus_pusillus	Mungotictis_decemlineata	0.236842645439472
Arctocephalus_pusillus	Mustela_altaica	0.238332633452024
Arctocephalus_pusillus	Mustela_erminea	0.226152489140326
Arctocephalus_pusillus	Mustela_eversmannii	0.235088851973937
Arctocephalus_pusillus	Mustela_frenata	0.229624496101107
Arctocephalus_pusillus	Mustela_itatsi	0.231799281955352
Arctocephalus_pusillus	Mustela_kathiah	0.23694716471306
Arctocephalus_pusillus	Mustela_nigripes	0.233503089324732
Arctocephalus_pusillus	Mustela_nivalis	0.235911770666649
Arctocephalus_pusillus	Mustela_putorius	0.233968102266018
Arctocephalus_pusillus	Mustela_sibirica	0.234267978894543
Arctocephalus_pusillus	Nandinia_binotata	0.221035104926346
Arctocephalus_pusillus	Nasua_nasua	0.239594468729615
Arctocephalus_pusillus	Neofelis_nebulosa	0.245931116987921
Arctocephalus_pusillus	Neomonachus_schauinslandi	0.177000553529774
Arctocephalus_pusillus	Neophoca_cinerea	0.0782488798342201
Arctocephalus_pusillus	Neovison_vison	0.234046018589432
Arctocephalus_pusillus	Nyctereutes_procyonoides	0.240025541713931
Arctocephalus_pusillus	Odobenus_rosmarus_rosmarus	0.197327537690182
Arctocephalus_pusillus	Otocolobus_manul	0.230751778567479
Arctocephalus_pusillus	Otocyon_megalotis_megalotis_TS305	0.246789849947891
Arctocephalus_pusillus	Otocyon_megalotis_virgatus_FMNH158128	0.246858342297476
Arctocephalus_pusillus	Paguma_larvata	0.238118808494364
Arctocephalus_pusillus	Panthera_leo	0.238964489809424
Arctocephalus_pusillus	Panthera_onca	0.238203292918984
Arctocephalus_pusillus	Panthera_pardus	0.240679095269961
Arctocephalus_pusillus	Panthera_tigris	0.238467907107806
Arctocephalus_pusillus	Panthera_uncia	0.24287294075523
Arctocephalus_pusillus	Paradoxurus_hermaphroditus	0.242380105244979
Arctocephalus_pusillus	Parahyaena_brunnea_FD126_Fecal	0.240551321181662
Arctocephalus_pusillus	Pardofelis_marmorata	0.235898548182429
Arctocephalus_pusillus	Phoca_fasciata	0.180315053424778
Arctocephalus_pusillus	Phoca_groenlandica	0.185802002823548
Arctocephalus_pusillus	Phoca_largha	0.182989134247085
Arctocephalus_pusillus	Phoca_vitulina	0.184857141732459
Arctocephalus_pusillus	Phocarctos_hookeri	0.081111273711675
Arctocephalus_pusillus	Prionailurus_bengalensis	0.232814250167005
Arctocephalus_pusillus	Prionailurus_bengalensis_euptilurus	0.229704017724613
Arctocephalus_pusillus	Prionailurus_planiceps	0.235468845336309
Arctocephalus_pusillus	Prionailurus_rubiginosus	0.234324424456871
Arctocephalus_pusillus	Prionailurus_viverrinus	0.235399559385392
Arctocephalus_pusillus	Prionodon_pardicolor	0.243634415580215
Arctocephalus_pusillus	Procyon_lotor	0.234441942285165
Arctocephalus_pusillus	Profelis_aurata	0.235669319325242
Arctocephalus_pusillus	Proteles_cristatus_cristatus_TS307	0.239620285301158
Arctocephalus_pusillus	Proteles_cristatus_septentrionalis_NMS_Z_2018_54	0.243982269297119
Arctocephalus_pusillus	Puma_concolor	0.235016772071204
Arctocephalus_pusillus	Puma_yagouaroundi	0.235496567349685
Arctocephalus_pusillus	Pusa_caspica	0.18611623767206
Arctocephalus_pusillus	Pusa_hispida	0.184271546955667
Arctocephalus_pusillus	Pusa_sibirica	0.184882898892577
Arctocephalus_pusillus	Speothos_venaticus_T1624	0.251680598584436
Arctocephalus_pusillus	Spilogale_putorius	0.245887393421638
Arctocephalus_pusillus	Taxidea_taxus	0.220995696350693
Arctocephalus_pusillus	Tremarctos_ornatus	0.232386754050553
Arctocephalus_pusillus	Urocyon_cinereoargenteus	0.2484394253611
Arctocephalus_pusillus	Ursus_americanus	0.232047839126461
Arctocephalus_pusillus	Ursus_arctos	0.238969902278595
Arctocephalus_pusillus	Ursus_maritimus	0.235360379776555
Arctocephalus_pusillus	Ursus_spelaeus	0.234763403608741
Arctocephalus_pusillus	Ursus_thibetanus	0.234392301044217
Arctocephalus_pusillus	Urva_javanica	0.237964344902317
Arctocephalus_pusillus	Viverra_tangalunga_FMNH146957_SRR6053069	0.233934662365976
Arctocephalus_pusillus	Viverricula_indica	0.235477418048275
Arctocephalus_pusillus	Vulpes_corsac	0.248473153640649
Arctocephalus_pusillus	Vulpes_ferrilata	0.250672228474313
Arctocephalus_pusillus	Vulpes_lagopus	0.245808956923715
Arctocephalus_pusillus	Vulpes_vulpes_T3611	0.244884581693837
Arctocephalus_pusillus	Vulpes_zerda	0.246426906818943
Arctocephalus_pusillus	Zalophus_californianus	0.0821369129108798
Arctocephalus_townsendi	Arctodus_simus	0.230389618409102
Arctocephalus_townsendi	Arctonyx_collaris	0.232108947851035
Arctocephalus_townsendi	Arctotherium_sp_	0.233365705575991
Arctocephalus_townsendi	Bdeogale_nigripes_FMNH167685_SRR6053065	0.239934954721275
Arctocephalus_townsendi	Callorhinus_ursinus	0.117806694116463
Arctocephalus_townsendi	Canis_anthus	0.252667351187887
Arctocephalus_townsendi	Canis_latrans	0.250452990051263
Arctocephalus_townsendi	Canis_lupus	0.254272770139112
Arctocephalus_townsendi	Caracal_caracal	0.238705248752981
Arctocephalus_townsendi	Catopuma_badia	0.239876604821226
Arctocephalus_townsendi	Catopuma_temminckii	0.239898106602863
Arctocephalus_townsendi	Chrysocyon_brachyurus	0.255654932672022
Arctocephalus_townsendi	Civettictis_civetta	0.240715062232012
Arctocephalus_townsendi	Conepatus_chinga	0.239893993091109
Arctocephalus_townsendi	Crocuta_crocuta	0.246293197328591
Arctocephalus_townsendi	Cuon_alpinus	0.25771087012621
Arctocephalus_townsendi	Cystophora_cristata	0.189422167806268
Arctocephalus_townsendi	Enhydra_lutris	0.23528054979783
Arctocephalus_townsendi	Erignathus_barbatus	0.181111695436735
Arctocephalus_townsendi	Eumetopias_jubatus	0.0875124563346057
Arctocephalus_townsendi	Felis_catus	0.241097012737713
Arctocephalus_townsendi	Felis_chaus	0.240884533829979
Arctocephalus_townsendi	Felis_margarita	0.2395156952079
Arctocephalus_townsendi	Felis_nigripes	0.24330153258098
Arctocephalus_townsendi	Felis_silvestris	0.240136024000664
Arctocephalus_townsendi	Fossa_fossana_FMNH156648_SRR6053060	0.23390806171203
Arctocephalus_townsendi	Genetta_servalina	0.236490493684712
Arctocephalus_townsendi	Gulo_gulo	0.235574587444363
Arctocephalus_townsendi	Halichoerus_grypus	0.188556403427421
Arctocephalus_townsendi	Helarctos_malayanus	0.23041860490029
Arctocephalus_townsendi	Hyaena_hyaena	0.246988957237839
Arctocephalus_townsendi	Hydrurga_leptonyx	0.181029917210402
Arctocephalus_townsendi	Leopardus_colocolo	0.240905997828059
Arctocephalus_townsendi	Leopardus_geoffroyi	0.238885121051414
Arctocephalus_townsendi	Leopardus_guigna	0.237773886012393
Arctocephalus_townsendi	Leopardus_jacobita	0.243051666899444
Arctocephalus_townsendi	Leopardus_pardalis	0.238181216154728
Arctocephalus_townsendi	Leopardus_tigrinus	0.236845116992168
Arctocephalus_townsendi	Leopardus_wiedii	0.236136382954145
Arctocephalus_townsendi	Leptailurus_serval	0.236769754931966
Arctocephalus_townsendi	Leptonychotes_weddellii	0.179697835421269
Arctocephalus_townsendi	Lobodon_carcinophaga	0.18120977249475
Arctocephalus_townsendi	Lutra_lutra	0.233556061062166
Arctocephalus_townsendi	Lutra_sumatrana	0.233908515081245
Arctocephalus_townsendi	Lutrogale_perspicillata	0.236626901021875
Arctocephalus_townsendi	Lycaon_pictus	0.253156345808094
Arctocephalus_townsendi	Lynx_canadensis	0.237933225817369
Arctocephalus_townsendi	Lynx_lynx	0.236178512376875
Arctocephalus_townsendi	Lynx_pardinus	0.235556122374644
Arctocephalus_townsendi	Lynx_rufus	0.235683065275412
Arctocephalus_townsendi	Manis_javanica	0.287785983431861
Arctocephalus_townsendi	Martes_americana	0.234945877763916
Arctocephalus_townsendi	Martes_flavigula	0.230640286018342
Arctocephalus_townsendi	Martes_foina	0.233820354981592
Arctocephalus_townsendi	Martes_martes	0.230804903001264
Arctocephalus_townsendi	Martes_melampus	0.232077507998899
Arctocephalus_townsendi	Martes_pennanti	0.238084768068046
Arctocephalus_townsendi	Martes_zibellina	0.230351156965135
Arctocephalus_townsendi	Meles_anakuma	0.236926390260693
Arctocephalus_townsendi	Meles_leucurus	0.232184050243351
Arctocephalus_townsendi	Meles_meles	0.232870522111621
Arctocephalus_townsendi	Melogale_moschata	0.23728635528659
Arctocephalus_townsendi	Melursus_ursinus	0.235673771842899
Arctocephalus_townsendi	Mephitis_mephitis	0.243144261681552
Arctocephalus_townsendi	Mirounga_leonina	0.181272776240519
Arctocephalus_townsendi	Mungotictis_decemlineata	0.243648873345979
Arctocephalus_townsendi	Mustela_altaica	0.235755741074271
Arctocephalus_townsendi	Mustela_erminea	0.229517942485615
Arctocephalus_townsendi	Mustela_eversmannii	0.239514715314529
Arctocephalus_townsendi	Mustela_frenata	0.230476238184483
Arctocephalus_townsendi	Mustela_itatsi	0.235000304732401
Arctocephalus_townsendi	Mustela_kathiah	0.23865397681142
Arctocephalus_townsendi	Mustela_nigripes	0.238652433882032
Arctocephalus_townsendi	Mustela_nivalis	0.23792694685251
Arctocephalus_townsendi	Mustela_putorius	0.237046538444649
Arctocephalus_townsendi	Mustela_sibirica	0.237573274612976
Arctocephalus_townsendi	Nandinia_binotata	0.22969240897601
Arctocephalus_townsendi	Nasua_nasua	0.243582343017436
Arctocephalus_townsendi	Neofelis_nebulosa	0.250723197339094
Arctocephalus_townsendi	Neomonachus_schauinslandi	0.183976373906375
Arctocephalus_townsendi	Neophoca_cinerea	0.0721106288170296
Arctocephalus_townsendi	Neovison_vison	0.234391034925633
Arctocephalus_townsendi	Nyctereutes_procyonoides	0.243644753222642
Arctocephalus_townsendi	Odobenus_rosmarus_rosmarus	0.197852899976415
Arctocephalus_townsendi	Otocolobus_manul	0.235970136843327
Arctocephalus_townsendi	Otocyon_megalotis_megalotis_TS305	0.251418936840076
Arctocephalus_townsendi	Otocyon_megalotis_virgatus_FMNH158128	0.251941331982656
Arctocephalus_townsendi	Paguma_larvata	0.24312841536325
Arctocephalus_townsendi	Panthera_leo	0.247931797411507
Arctocephalus_townsendi	Panthera_onca	0.242356761534676
Arctocephalus_townsendi	Panthera_pardus	0.247479052615434
Arctocephalus_townsendi	Panthera_tigris	0.24520146742177
Arctocephalus_townsendi	Panthera_uncia	0.248951974596077
Arctocephalus_townsendi	Paradoxurus_hermaphroditus	0.247275960027673
Arctocephalus_townsendi	Parahyaena_brunnea_FD126_Fecal	0.24613932382583
Arctocephalus_townsendi	Pardofelis_marmorata	0.243053039817498
Arctocephalus_townsendi	Phoca_fasciata	0.184554734106757
Arctocephalus_townsendi	Phoca_groenlandica	0.191018743847245
Arctocephalus_townsendi	Phoca_largha	0.187419996635006
Arctocephalus_townsendi	Phoca_vitulina	0.189175644963111
Arctocephalus_townsendi	Phocarctos_hookeri	0.0776116197987364
Arctocephalus_townsendi	Prionailurus_bengalensis	0.23467782636793
Arctocephalus_townsendi	Prionailurus_bengalensis_euptilurus	0.234726544660565
Arctocephalus_townsendi	Prionailurus_planiceps	0.236855484573544
Arctocephalus_townsendi	Prionailurus_rubiginosus	0.234224322529321
Arctocephalus_townsendi	Prionailurus_viverrinus	0.237292721918264
Arctocephalus_townsendi	Prionodon_pardicolor	0.24918852088172
Arctocephalus_townsendi	Procyon_lotor	0.240455060920738
Arctocephalus_townsendi	Profelis_aurata	0.245233835042519
Arctocephalus_townsendi	Proteles_cristatus_cristatus_TS307	0.248333765489616
Arctocephalus_townsendi	Proteles_cristatus_septentrionalis_NMS_Z_2018_54	0.249010203022326
Arctocephalus_townsendi	Puma_concolor	0.241136832238077
Arctocephalus_townsendi	Puma_yagouaroundi	0.239717166664588
Arctocephalus_townsendi	Pusa_caspica	0.187245481510229
Arctocephalus_townsendi	Pusa_hispida	0.186569695602297
Arctocephalus_townsendi	Pusa_sibirica	0.187245481510229
Arctocephalus_townsendi	Speothos_venaticus_T1624	0.255816215041425
Arctocephalus_townsendi	Spilogale_putorius	0.246257148032477
Arctocephalus_townsendi	Taxidea_taxus	0.228482926920779
Arctocephalus_townsendi	Tremarctos_ornatus	0.238366713705066
Arctocephalus_townsendi	Urocyon_cinereoargenteus	0.254908361115931
Arctocephalus_townsendi	Ursus_americanus	0.233277523307477
Arctocephalus_townsendi	Ursus_arctos	0.240552908161087
Arctocephalus_townsendi	Ursus_maritimus	0.237613782464678
Arctocephalus_townsendi	Ursus_spelaeus	0.236250348831826
Arctocephalus_townsendi	Ursus_thibetanus	0.23579852456071
Arctocephalus_townsendi	Urva_javanica	0.24240810504353
Arctocephalus_townsendi	Viverra_tangalunga_FMNH146957_SRR6053069	0.237489244591267
Arctocephalus_townsendi	Viverricula_indica	0.238172138799788
Arctocephalus_townsendi	Vulpes_corsac	0.254124404391842
Arctocephalus_townsendi	Vulpes_ferrilata	0.255093581119635
Arctocephalus_townsendi	Vulpes_lagopus	0.25274852767849
Arctocephalus_townsendi	Vulpes_vulpes_T3611	0.249957503744342
Arctocephalus_townsendi	Vulpes_zerda	0.25095233225241
Arctocephalus_townsendi	Zalophus_californianus	0.0851097526984944
Arctodus_simus	Arctonyx_collaris	0.232327408335888
Arctodus_simus	Arctotherium_sp_	0.107877315464513
Arctodus_simus	Bdeogale_nigripes_FMNH167685_SRR6053065	0.235611494868114
Arctodus_simus	Callorhinus_ursinus	0.227973029790585
Arctodus_simus	Canis_anthus	0.248426029155959
Arctodus_simus	Canis_latrans	0.242802056756656
Arctodus_simus	Canis_lupus	0.244950166335442
Arctodus_simus	Caracal_caracal	0.228255327383799
Arctodus_simus	Catopuma_badia	0.226618790199666
Arctodus_simus	Catopuma_temminckii	0.227628325381731
Arctodus_simus	Chrysocyon_brachyurus	0.24277334119063
Arctodus_simus	Civettictis_civetta	0.231916904555018
Arctodus_simus	Conepatus_chinga	0.234899518943436
Arctodus_simus	Crocuta_crocuta	0.24278387977926
Arctodus_simus	Cuon_alpinus	0.245882072647729
Arctodus_simus	Cystophora_cristata	0.208081104695904
Arctodus_simus	Enhydra_lutris	0.227920641893543
Arctodus_simus	Erignathus_barbatus	0.206272591252728
Arctodus_simus	Eumetopias_jubatus	0.223418273369412
Arctodus_simus	Felis_catus	0.23127718377831
Arctodus_simus	Felis_chaus	0.235868256395128
Arctodus_simus	Felis_margarita	0.229467258516269
Arctodus_simus	Felis_nigripes	0.233107421919977
Arctodus_simus	Felis_silvestris	0.227268727987131
Arctodus_simus	Fossa_fossana_FMNH156648_SRR6053060	0.231779071186441
Arctodus_simus	Genetta_servalina	0.226814843281276
Arctodus_simus	Gulo_gulo	0.232995091570715
Arctodus_simus	Halichoerus_grypus	0.206258589012011
Arctodus_simus	Helarctos_malayanus	0.166437521572924
Arctodus_simus	Hyaena_hyaena	0.239437149940887
Arctodus_simus	Hydrurga_leptonyx	0.201502462789301
Arctodus_simus	Leopardus_colocolo	0.228972640384094
Arctodus_simus	Leopardus_geoffroyi	0.231454235410899
Arctodus_simus	Leopardus_guigna	0.229819795635394
Arctodus_simus	Leopardus_jacobita	0.231709025242604
Arctodus_simus	Leopardus_pardalis	0.226268577162332
Arctodus_simus	Leopardus_tigrinus	0.228631966542845
Arctodus_simus	Leopardus_wiedii	0.229257318750088
Arctodus_simus	Leptailurus_serval	0.224853575467349
Arctodus_simus	Leptonychotes_weddellii	0.198726685243374
Arctodus_simus	Lobodon_carcinophaga	0.206563786671997
Arctodus_simus	Lutra_lutra	0.234816653473749
Arctodus_simus	Lutra_sumatrana	0.232248033005806
Arctodus_simus	Lutrogale_perspicillata	0.239469819304267
Arctodus_simus	Lycaon_pictus	0.238224467505097
Arctodus_simus	Lynx_canadensis	0.232330593442773
Arctodus_simus	Lynx_lynx	0.231221971177308
Arctodus_simus	Lynx_pardinus	0.232107122990687
Arctodus_simus	Lynx_rufus	0.229467258516269
Arctodus_simus	Manis_javanica	0.303647838410552
Arctodus_simus	Martes_americana	0.229624386154636
Arctodus_simus	Martes_flavigula	0.23185369663864
Arctodus_simus	Martes_foina	0.228692569552976
Arctodus_simus	Martes_martes	0.229629531973824
Arctodus_simus	Martes_melampus	0.228199076382383
Arctodus_simus	Martes_pennanti	0.235601627400291
Arctodus_simus	Martes_zibellina	0.230960424636925
Arctodus_simus	Meles_anakuma	0.238439455051213
Arctodus_simus	Meles_leucurus	0.231124596469978
Arctodus_simus	Meles_meles	0.227389879466989
Arctodus_simus	Melogale_moschata	0.23324655748369
Arctodus_simus	Melursus_ursinus	0.171586808479576
Arctodus_simus	Mephitis_mephitis	0.235786216409766
Arctodus_simus	Mirounga_leonina	0.203971485059191
Arctodus_simus	Mungotictis_decemlineata	0.235744921793757
Arctodus_simus	Mustela_altaica	0.235037780762957
Arctodus_simus	Mustela_erminea	0.225048561410094
Arctodus_simus	Mustela_eversmannii	0.22960026464837
Arctodus_simus	Mustela_frenata	0.2261009547356
Arctodus_simus	Mustela_itatsi	0.230195805471298
Arctodus_simus	Mustela_kathiah	0.231209498664567
Arctodus_simus	Mustela_nigripes	0.227359762309717
Arctodus_simus	Mustela_nivalis	0.233768974141147
Arctodus_simus	Mustela_putorius	0.228192671360816
Arctodus_simus	Mustela_sibirica	0.231296502322242
Arctodus_simus	Nandinia_binotata	0.21820952725463
Arctodus_simus	Nasua_nasua	0.248711555486315
Arctodus_simus	Neofelis_nebulosa	0.24595564967918
Arctodus_simus	Neomonachus_schauinslandi	0.210658739078072
Arctodus_simus	Neophoca_cinerea	0.228243772056497
Arctodus_simus	Neovison_vison	0.228961852539245
Arctodus_simus	Nyctereutes_procyonoides	0.239400916035451
Arctodus_simus	Odobenus_rosmarus_rosmarus	0.23867463567648
Arctodus_simus	Otocolobus_manul	0.23702716508438
Arctodus_simus	Otocyon_megalotis_megalotis_TS305	0.247473428780776
Arctodus_simus	Otocyon_megalotis_virgatus_FMNH158128	0.245702451031661
Arctodus_simus	Paguma_larvata	0.230760816692788
Arctodus_simus	Panthera_leo	0.238688197180389
Arctodus_simus	Panthera_onca	0.239566581000475
Arctodus_simus	Panthera_pardus	0.242021467537038
Arctodus_simus	Panthera_tigris	0.244655375059352
Arctodus_simus	Panthera_uncia	0.242739005587416
Arctodus_simus	Paradoxurus_hermaphroditus	0.237828437339276
Arctodus_simus	Parahyaena_brunnea_FD126_Fecal	0.239676419255276
Arctodus_simus	Pardofelis_marmorata	0.236351893863162
Arctodus_simus	Phoca_fasciata	0.204381214217953
Arctodus_simus	Phoca_groenlandica	0.207172034622362
Arctodus_simus	Phoca_largha	0.207444957126843
Arctodus_simus	Phoca_vitulina	0.207433079000891
Arctodus_simus	Phocarctos_hookeri	0.231728663484342
Arctodus_simus	Prionailurus_bengalensis	0.226859685722288
Arctodus_simus	Prionailurus_bengalensis_euptilurus	0.232285339735145
Arctodus_simus	Prionailurus_planiceps	0.229213322304584
Arctodus_simus	Prionailurus_rubiginosus	0.2275417851275
Arctodus_simus	Prionailurus_viverrinus	0.231112296240177
Arctodus_simus	Prionodon_pardicolor	0.238901803003076
Arctodus_simus	Procyon_lotor	0.233467384247784
Arctodus_simus	Profelis_aurata	0.233778629505636
Arctodus_simus	Proteles_cristatus_cristatus_TS307	0.243729582634851
Arctodus_simus	Proteles_cristatus_septentrionalis_NMS_Z_2018_54	0.243996225625198
Arctodus_simus	Puma_concolor	0.231233069864885
Arctodus_simus	Puma_yagouaroundi	0.232518386342593
Arctodus_simus	Pusa_caspica	0.205669809195751
Arctodus_simus	Pusa_hispida	0.203902612360595
Arctodus_simus	Pusa_sibirica	0.20461723545366
Arctodus_simus	Speothos_venaticus_T1624	0.249898475663568
Arctodus_simus	Spilogale_putorius	0.239791603506524
Arctodus_simus	Taxidea_taxus	0.224793415425225
Arctodus_simus	Tremarctos_ornatus	0.104123842585008
Arctodus_simus	Urocyon_cinereoargenteus	0.254272037980765
Arctodus_simus	Ursus_americanus	0.164904256834109
Arctodus_simus	Ursus_arctos	0.174186537006755
Arctodus_simus	Ursus_maritimus	0.174123915914674
Arctodus_simus	Ursus_spelaeus	0.171565967085526
Arctodus_simus	Ursus_thibetanus	0.164468467678562
Arctodus_simus	Urva_javanica	0.242844742913156
Arctodus_simus	Viverra_tangalunga_FMNH146957_SRR6053069	0.225970336325855
Arctodus_simus	Viverricula_indica	0.227146847220936
Arctodus_simus	Vulpes_corsac	0.242619644428769
Arctodus_simus	Vulpes_ferrilata	0.246253270084108
Arctodus_simus	Vulpes_lagopus	0.243650570985511
Arctodus_simus	Vulpes_vulpes_T3611	0.239830942052306
Arctodus_simus	Vulpes_zerda	0.238444477765207
Arctodus_simus	Zalophus_californianus	0.224447562784566
Arctonyx_collaris	Arctotherium_sp_	0.23391740885146
Arctonyx_collaris	Bdeogale_nigripes_FMNH167685_SRR6053065	0.242135005334988
Arctonyx_collaris	Callorhinus_ursinus	0.222679554445671
Arctonyx_collaris	Canis_anthus	0.241337205293932
Arctonyx_collaris	Canis_latrans	0.236412365390915
Arctonyx_collaris	Canis_lupus	0.237369898347434
Arctonyx_collaris	Caracal_caracal	0.232824861765389
Arctonyx_collaris	Catopuma_badia	0.228132310986806
Arctonyx_collaris	Catopuma_temminckii	0.230303491640771
Arctonyx_collaris	Chrysocyon_brachyurus	0.240659599431818
Arctonyx_collaris	Civettictis_civetta	0.227665083842702
Arctonyx_collaris	Conepatus_chinga	0.232055085752038
Arctonyx_collaris	Crocuta_crocuta	0.245620857134351
Arctonyx_collaris	Cuon_alpinus	0.242266780312128
Arctonyx_collaris	Cystophora_cristata	0.214154537504438
Arctonyx_collaris	Enhydra_lutris	0.173561219299169
Arctonyx_collaris	Erignathus_barbatus	0.212370639981085
Arctonyx_collaris	Eumetopias_jubatus	0.229653409506242
Arctonyx_collaris	Felis_catus	0.233865796567393
Arctonyx_collaris	Felis_chaus	0.234276225355715
Arctonyx_collaris	Felis_margarita	0.230499987988932
Arctonyx_collaris	Felis_nigripes	0.23323471985454
Arctonyx_collaris	Felis_silvestris	0.231110361400396
Arctonyx_collaris	Fossa_fossana_FMNH156648_SRR6053060	0.229929681011993
Arctonyx_collaris	Genetta_servalina	0.222328627260376
Arctonyx_collaris	Gulo_gulo	0.171595157221552
Arctonyx_collaris	Halichoerus_grypus	0.216478298517905
Arctonyx_collaris	Helarctos_malayanus	0.240033389308155
Arctonyx_collaris	Hyaena_hyaena	0.243245658050171
Arctonyx_collaris	Hydrurga_leptonyx	0.208194704273137
Arctonyx_collaris	Leopardus_colocolo	0.228132310986806
Arctonyx_collaris	Leopardus_geoffroyi	0.230430910422248
Arctonyx_collaris	Leopardus_guigna	0.230939065953482
Arctonyx_collaris	Leopardus_jacobita	0.230633017136003
Arctonyx_collaris	Leopardus_pardalis	0.23080517593849
Arctonyx_collaris	Leopardus_tigrinus	0.228568710876757
Arctonyx_collaris	Leopardus_wiedii	0.232415227576261
Arctonyx_collaris	Leptailurus_serval	0.224802630163764
Arctonyx_collaris	Leptonychotes_weddellii	0.208129861910002
Arctonyx_collaris	Lobodon_carcinophaga	0.206472635974124
Arctonyx_collaris	Lutra_lutra	0.175772149443916
Arctonyx_collaris	Lutra_sumatrana	0.175058461334092
Arctonyx_collaris	Lutrogale_perspicillata	0.184253848197172
Arctonyx_collaris	Lycaon_pictus	0.238464091760049
Arctonyx_collaris	Lynx_canadensis	0.22909708614214
Arctonyx_collaris	Lynx_lynx	0.228846916207623
Arctonyx_collaris	Lynx_pardinus	0.22952351087247
Arctonyx_collaris	Lynx_rufus	0.228916894403762
Arctonyx_collaris	Manis_javanica	0.296963133427027
Arctonyx_collaris	Martes_americana	0.171844996962337
Arctonyx_collaris	Martes_flavigula	0.170999567321824
Arctonyx_collaris	Martes_foina	0.164072329815196
Arctonyx_collaris	Martes_martes	0.169445793468122
Arctonyx_collaris	Martes_melampus	0.170313454614591
Arctonyx_collaris	Martes_pennanti	0.178747079252808
Arctonyx_collaris	Martes_zibellina	0.171512930411686
Arctonyx_collaris	Meles_anakuma	0.104596944488525
Arctonyx_collaris	Meles_leucurus	0.0980919744506725
Arctonyx_collaris	Meles_meles	0.104174365670318
Arctonyx_collaris	Melogale_moschata	0.174820704112348
Arctonyx_collaris	Melursus_ursinus	0.242700406384488
Arctonyx_collaris	Mephitis_mephitis	0.226511185949526
Arctonyx_collaris	Mirounga_leonina	0.211147508460373
Arctonyx_collaris	Mungotictis_decemlineata	0.2373522568232
Arctonyx_collaris	Mustela_altaica	0.178298000930741
Arctonyx_collaris	Mustela_erminea	0.165884580417402
Arctonyx_collaris	Mustela_eversmannii	0.1752449755261
Arctonyx_collaris	Mustela_frenata	0.169116055464446
Arctonyx_collaris	Mustela_itatsi	0.173170565645986
Arctonyx_collaris	Mustela_kathiah	0.170798738199939
Arctonyx_collaris	Mustela_nigripes	0.173723631452434
Arctonyx_collaris	Mustela_nivalis	0.173974929323802
Arctonyx_collaris	Mustela_putorius	0.175542287630834
Arctonyx_collaris	Mustela_sibirica	0.174937724389845
Arctonyx_collaris	Nandinia_binotata	0.215712665979983
Arctonyx_collaris	Nasua_nasua	0.236223126933071
Arctonyx_collaris	Neofelis_nebulosa	0.250063608608277
Arctonyx_collaris	Neomonachus_schauinslandi	0.21054395255206
Arctonyx_collaris	Neophoca_cinerea	0.235589491068492
Arctonyx_collaris	Neovison_vison	0.161808480100257
Arctonyx_collaris	Nyctereutes_procyonoides	0.241281518035909
Arctonyx_collaris	Odobenus_rosmarus_rosmarus	0.247461544922482
Arctonyx_collaris	Otocolobus_manul	0.226952553738214
Arctonyx_collaris	Otocyon_megalotis_megalotis_TS305	0.250521427532801
Arctonyx_collaris	Otocyon_megalotis_virgatus_FMNH158128	0.251655729289697
Arctonyx_collaris	Paguma_larvata	0.227286235879052
Arctonyx_collaris	Panthera_leo	0.238419019532889
Arctonyx_collaris	Panthera_onca	0.23770020715895
Arctonyx_collaris	Panthera_pardus	0.238399751036655
Arctonyx_collaris	Panthera_tigris	0.242311687361657
Arctonyx_collaris	Panthera_uncia	0.244221581252687
Arctonyx_collaris	Paradoxurus_hermaphroditus	0.228654246550725
Arctonyx_collaris	Parahyaena_brunnea_FD126_Fecal	0.24280355644171
Arctonyx_collaris	Pardofelis_marmorata	0.235869972561955
Arctonyx_collaris	Phoca_fasciata	0.215852497610798
Arctonyx_collaris	Phoca_groenlandica	0.216591002606063
Arctonyx_collaris	Phoca_largha	0.213912875015436
Arctonyx_collaris	Phoca_vitulina	0.214487112345254
Arctonyx_collaris	Phocarctos_hookeri	0.236469023276735
Arctonyx_collaris	Prionailurus_bengalensis	0.230201312933504
Arctonyx_collaris	Prionailurus_bengalensis_euptilurus	0.232415227576261
Arctonyx_collaris	Prionailurus_planiceps	0.235491176146476
Arctonyx_collaris	Prionailurus_rubiginosus	0.23287524944524
Arctonyx_collaris	Prionailurus_viverrinus	0.232882577084998
Arctonyx_collaris	Prionodon_pardicolor	0.231067892729335
Arctonyx_collaris	Procyon_lotor	0.214957462120387
Arctonyx_collaris	Profelis_aurata	0.23644558080906
Arctonyx_collaris	Proteles_cristatus_cristatus_TS307	0.241087211841275
Arctonyx_collaris	Proteles_cristatus_septentrionalis_NMS_Z_2018_54	0.24372505508218
Arctonyx_collaris	Puma_concolor	0.227655341366311
Arctonyx_collaris	Puma_yagouaroundi	0.229971873820807
Arctonyx_collaris	Pusa_caspica	0.215826433893886
Arctonyx_collaris	Pusa_hispida	0.212343192067207
Arctonyx_collaris	Pusa_sibirica	0.215656186066606
Arctonyx_collaris	Speothos_venaticus_T1624	0.248945310910416
Arctonyx_collaris	Spilogale_putorius	0.225849673677687
Arctonyx_collaris	Taxidea_taxus	0.175849362377692
Arctonyx_collaris	Tremarctos_ornatus	0.239993849397068
Arctonyx_collaris	Urocyon_cinereoargenteus	0.257587789325522
Arctonyx_collaris	Ursus_americanus	0.232963457472828
Arctonyx_collaris	Ursus_arctos	0.242517628259509
Arctonyx_collaris	Ursus_maritimus	0.242704852741252
Arctonyx_collaris	Ursus_spelaeus	0.239913211928191
Arctonyx_collaris	Ursus_thibetanus	0.232627323006387
Arctonyx_collaris	Urva_javanica	0.239785097617416
Arctonyx_collaris	Viverra_tangalunga_FMNH146957_SRR6053069	0.22905569789544
Arctonyx_collaris	Viverricula_indica	0.225666619233656
Arctonyx_collaris	Vulpes_corsac	0.252701283205579
Arctonyx_collaris	Vulpes_ferrilata	0.252644486372819
Arctonyx_collaris	Vulpes_lagopus	0.24976445887352
Arctonyx_collaris	Vulpes_vulpes_T3611	0.247846153654299
Arctonyx_collaris	Vulpes_zerda	0.247460739340957
Arctonyx_collaris	Zalophus_californianus	0.228681372472563
Arctotherium_sp_	Bdeogale_nigripes_FMNH167685_SRR6053065	0.243353958670655
Arctotherium_sp_	Callorhinus_ursinus	0.231582357715214
Arctotherium_sp_	Canis_anthus	0.250659735987674
Arctotherium_sp_	Canis_latrans	0.244448611993991
Arctotherium_sp_	Canis_lupus	0.245694789142986
Arctotherium_sp_	Caracal_caracal	0.236679989005785
Arctotherium_sp_	Catopuma_badia	0.232151993156406
Arctotherium_sp_	Catopuma_temminckii	0.234795018520038
Arctotherium_sp_	Chrysocyon_brachyurus	0.240609601997332
Arctotherium_sp_	Civettictis_civetta	0.232958752420309
Arctotherium_sp_	Conepatus_chinga	0.241066571068733
Arctotherium_sp_	Crocuta_crocuta	0.248490287505388
Arctotherium_sp_	Cuon_alpinus	0.249159998919307
Arctotherium_sp_	Cystophora_cristata	0.209910396427472
Arctotherium_sp_	Enhydra_lutris	0.237182189780878
Arctotherium_sp_	Erignathus_barbatus	0.20943029424252
Arctotherium_sp_	Eumetopias_jubatus	0.227167207328022
Arctotherium_sp_	Felis_catus	0.239380077087717
Arctotherium_sp_	Felis_chaus	0.240321592221929
Arctotherium_sp_	Felis_margarita	0.237657911168236
Arctotherium_sp_	Felis_nigripes	0.237787103885656
Arctotherium_sp_	Felis_silvestris	0.236540467413373
Arctotherium_sp_	Fossa_fossana_FMNH156648_SRR6053060	0.235315811262932
Arctotherium_sp_	Genetta_servalina	0.234588373632727
Arctotherium_sp_	Gulo_gulo	0.229033856201772
Arctotherium_sp_	Halichoerus_grypus	0.211744376461521
Arctotherium_sp_	Helarctos_malayanus	0.168698372863198
Arctotherium_sp_	Hyaena_hyaena	0.246744072466476
Arctotherium_sp_	Hydrurga_leptonyx	0.206268201400843
Arctotherium_sp_	Leopardus_colocolo	0.238518428527693
Arctotherium_sp_	Leopardus_geoffroyi	0.23768127394468
Arctotherium_sp_	Leopardus_guigna	0.237480904346078
Arctotherium_sp_	Leopardus_jacobita	0.238164352165062
Arctotherium_sp_	Leopardus_pardalis	0.234883365548079
Arctotherium_sp_	Leopardus_tigrinus	0.235714031070437
Arctotherium_sp_	Leopardus_wiedii	0.237362848212128
Arctotherium_sp_	Leptailurus_serval	0.23392006396874
Arctotherium_sp_	Leptonychotes_weddellii	0.202336897065885
Arctotherium_sp_	Lobodon_carcinophaga	0.208063858132323
Arctotherium_sp_	Lutra_lutra	0.234537975291126
Arctotherium_sp_	Lutra_sumatrana	0.231160157321423
Arctotherium_sp_	Lutrogale_perspicillata	0.245244554896876
Arctotherium_sp_	Lycaon_pictus	0.241296165973174
Arctotherium_sp_	Lynx_canadensis	0.237227381449504
Arctotherium_sp_	Lynx_lynx	0.235259965088731
Arctotherium_sp_	Lynx_pardinus	0.236017184489958
Arctotherium_sp_	Lynx_rufus	0.232937579371022
Arctotherium_sp_	Manis_javanica	0.300180677473062
Arctotherium_sp_	Martes_americana	0.234067558357812
Arctotherium_sp_	Martes_flavigula	0.238488396255057
Arctotherium_sp_	Martes_foina	0.230187880718728
Arctotherium_sp_	Martes_martes	0.236788091578226
Arctotherium_sp_	Martes_melampus	0.233756256647509
Arctotherium_sp_	Martes_pennanti	0.238866110515853
Arctotherium_sp_	Martes_zibellina	0.236547759493473
Arctotherium_sp_	Meles_anakuma	0.238586617750457
Arctotherium_sp_	Meles_leucurus	0.233149371992832
Arctotherium_sp_	Meles_meles	0.233407051708956
Arctotherium_sp_	Melogale_moschata	0.234896099047832
Arctotherium_sp_	Melursus_ursinus	0.175163174241398
Arctotherium_sp_	Mephitis_mephitis	0.241055647053571
Arctotherium_sp_	Mirounga_leonina	0.210721926331189
Arctotherium_sp_	Mungotictis_decemlineata	0.241420985335527
Arctotherium_sp_	Mustela_altaica	0.241571608180465
Arctotherium_sp_	Mustela_erminea	0.231755347785004
Arctotherium_sp_	Mustela_eversmannii	0.237726061344629
Arctotherium_sp_	Mustela_frenata	0.231531833943686
Arctotherium_sp_	Mustela_itatsi	0.239504601397638
Arctotherium_sp_	Mustela_kathiah	0.235798750778953
Arctotherium_sp_	Mustela_nigripes	0.238600339819645
Arctotherium_sp_	Mustela_nivalis	0.239822193725921
Arctotherium_sp_	Mustela_putorius	0.237426302384213
Arctotherium_sp_	Mustela_sibirica	0.23981397791681
Arctotherium_sp_	Nandinia_binotata	0.221581280523554
Arctotherium_sp_	Nasua_nasua	0.251486036080698
Arctotherium_sp_	Neofelis_nebulosa	0.253998090973661
Arctotherium_sp_	Neomonachus_schauinslandi	0.213945181099846
Arctotherium_sp_	Neophoca_cinerea	0.230561750268901
Arctotherium_sp_	Neovison_vison	0.235186466719802
Arctotherium_sp_	Nyctereutes_procyonoides	0.242472342330595
Arctotherium_sp_	Odobenus_rosmarus_rosmarus	0.23972899859314
Arctotherium_sp_	Otocolobus_manul	0.241335448601755
Arctotherium_sp_	Otocyon_megalotis_megalotis_TS305	0.250686251770296
Arctotherium_sp_	Otocyon_megalotis_virgatus_FMNH158128	0.248223063336872
Arctotherium_sp_	Paguma_larvata	0.237017988677135
Arctotherium_sp_	Panthera_leo	0.243078387692164
Arctotherium_sp_	Panthera_onca	0.247285354230984
Arctotherium_sp_	Panthera_pardus	0.247147538331434
Arctotherium_sp_	Panthera_tigris	0.245463129891682
Arctotherium_sp_	Panthera_uncia	0.245452097285748
Arctotherium_sp_	Paradoxurus_hermaphroditus	0.247981070419649
Arctotherium_sp_	Parahyaena_brunnea_FD126_Fecal	0.243818432036052
Arctotherium_sp_	Pardofelis_marmorata	0.239728605683955
Arctotherium_sp_	Phoca_fasciata	0.207986187777562
Arctotherium_sp_	Phoca_groenlandica	0.210574115230263
Arctotherium_sp_	Phoca_largha	0.209464737254261
Arctotherium_sp_	Phoca_vitulina	0.209994551259055
Arctotherium_sp_	Phocarctos_hookeri	0.235386964318794
Arctotherium_sp_	Prionailurus_bengalensis	0.237074328344797
Arctotherium_sp_	Prionailurus_bengalensis_euptilurus	0.235194510574832
Arctotherium_sp_	Prionailurus_planiceps	0.232993844570905
Arctotherium_sp_	Prionailurus_rubiginosus	0.231089306109085
Arctotherium_sp_	Prionailurus_viverrinus	0.237139034421462
Arctotherium_sp_	Prionodon_pardicolor	0.24675233619735
Arctotherium_sp_	Procyon_lotor	0.234798955744883
Arctotherium_sp_	Profelis_aurata	0.233931626819149
Arctotherium_sp_	Proteles_cristatus_cristatus_TS307	0.247057806797605
Arctotherium_sp_	Proteles_cristatus_septentrionalis_NMS_Z_2018_54	0.247552265775045
Arctotherium_sp_	Puma_concolor	0.23958710584854
Arctotherium_sp_	Puma_yagouaroundi	0.23620981718318
Arctotherium_sp_	Pusa_caspica	0.209826171715145
Arctotherium_sp_	Pusa_hispida	0.20696597612129
Arctotherium_sp_	Pusa_sibirica	0.20854995052993
Arctotherium_sp_	Speothos_venaticus_T1624	0.245982810591223
Arctotherium_sp_	Spilogale_putorius	0.242213868113627
Arctotherium_sp_	Taxidea_taxus	0.229132423062049
Arctotherium_sp_	Tremarctos_ornatus	0.107259946326475
Arctotherium_sp_	Urocyon_cinereoargenteus	0.252749519900611
Arctotherium_sp_	Ursus_americanus	0.169007324783263
Arctotherium_sp_	Ursus_arctos	0.173832676339985
Arctotherium_sp_	Ursus_maritimus	0.173031713863919
Arctotherium_sp_	Ursus_spelaeus	0.170062569127418
Arctotherium_sp_	Ursus_thibetanus	0.165683435723708
Arctotherium_sp_	Urva_javanica	0.246979047129644
Arctotherium_sp_	Viverra_tangalunga_FMNH146957_SRR6053069	0.228413266569683
Arctotherium_sp_	Viverricula_indica	0.231969165248992
Arctotherium_sp_	Vulpes_corsac	0.245393002976572
Arctotherium_sp_	Vulpes_ferrilata	0.248299657660984
Arctotherium_sp_	Vulpes_lagopus	0.24770570018186
Arctotherium_sp_	Vulpes_vulpes_T3611	0.245508202060626
Arctotherium_sp_	Vulpes_zerda	0.246148715638076
Arctotherium_sp_	Zalophus_californianus	0.226760985825056
Bdeogale_nigripes_FMNH167685_SRR6053065	Callorhinus_ursinus	0.231978143109546
Bdeogale_nigripes_FMNH167685_SRR6053065	Canis_anthus	0.246418282854776
Bdeogale_nigripes_FMNH167685_SRR6053065	Canis_latrans	0.242993830287979
Bdeogale_nigripes_FMNH167685_SRR6053065	Canis_lupus	0.244426737912035
Bdeogale_nigripes_FMNH167685_SRR6053065	Caracal_caracal	0.191105506685969
Bdeogale_nigripes_FMNH167685_SRR6053065	Catopuma_badia	0.189104634655914
Bdeogale_nigripes_FMNH167685_SRR6053065	Catopuma_temminckii	0.197671091654524
Bdeogale_nigripes_FMNH167685_SRR6053065	Chrysocyon_brachyurus	0.243971185761292
Bdeogale_nigripes_FMNH167685_SRR6053065	Civettictis_civetta	0.187818036076885
Bdeogale_nigripes_FMNH167685_SRR6053065	Conepatus_chinga	0.249418783010842
Bdeogale_nigripes_FMNH167685_SRR6053065	Crocuta_crocuta	0.19454224068299
Bdeogale_nigripes_FMNH167685_SRR6053065	Cuon_alpinus	0.24889797927512
Bdeogale_nigripes_FMNH167685_SRR6053065	Cystophora_cristata	0.221712082928222
Bdeogale_nigripes_FMNH167685_SRR6053065	Enhydra_lutris	0.241225107437254
Bdeogale_nigripes_FMNH167685_SRR6053065	Erignathus_barbatus	0.226548808366202
Bdeogale_nigripes_FMNH167685_SRR6053065	Eumetopias_jubatus	0.236555791579116
Bdeogale_nigripes_FMNH167685_SRR6053065	Felis_catus	0.195460997235349
Bdeogale_nigripes_FMNH167685_SRR6053065	Felis_chaus	0.197969697755713
Bdeogale_nigripes_FMNH167685_SRR6053065	Felis_margarita	0.193786304440934
Bdeogale_nigripes_FMNH167685_SRR6053065	Felis_nigripes	0.194586867006732
Bdeogale_nigripes_FMNH167685_SRR6053065	Felis_silvestris	0.193825107284353
Bdeogale_nigripes_FMNH167685_SRR6053065	Fossa_fossana_FMNH156648_SRR6053060	0.172155095579022
Bdeogale_nigripes_FMNH167685_SRR6053065	Genetta_servalina	0.190306216870581
Bdeogale_nigripes_FMNH167685_SRR6053065	Gulo_gulo	0.243839162804944
Bdeogale_nigripes_FMNH167685_SRR6053065	Halichoerus_grypus	0.224979335559311
Bdeogale_nigripes_FMNH167685_SRR6053065	Helarctos_malayanus	0.241596443243929
Bdeogale_nigripes_FMNH167685_SRR6053065	Hyaena_hyaena	0.192632025732202
Bdeogale_nigripes_FMNH167685_SRR6053065	Hydrurga_leptonyx	0.217247356172231
Bdeogale_nigripes_FMNH167685_SRR6053065	Leopardus_colocolo	0.190028564303053
Bdeogale_nigripes_FMNH167685_SRR6053065	Leopardus_geoffroyi	0.192278658189748
Bdeogale_nigripes_FMNH167685_SRR6053065	Leopardus_guigna	0.192553070192119
Bdeogale_nigripes_FMNH167685_SRR6053065	Leopardus_jacobita	0.196055142838988
Bdeogale_nigripes_FMNH167685_SRR6053065	Leopardus_pardalis	0.192052572352557
Bdeogale_nigripes_FMNH167685_SRR6053065	Leopardus_tigrinus	0.193415296360248
Bdeogale_nigripes_FMNH167685_SRR6053065	Leopardus_wiedii	0.19342949777322
Bdeogale_nigripes_FMNH167685_SRR6053065	Leptailurus_serval	0.19088932630281
Bdeogale_nigripes_FMNH167685_SRR6053065	Leptonychotes_weddellii	0.213814037595973
Bdeogale_nigripes_FMNH167685_SRR6053065	Lobodon_carcinophaga	0.219743734321551
Bdeogale_nigripes_FMNH167685_SRR6053065	Lutra_lutra	0.241376407233214
Bdeogale_nigripes_FMNH167685_SRR6053065	Lutra_sumatrana	0.242023671555859
Bdeogale_nigripes_FMNH167685_SRR6053065	Lutrogale_perspicillata	0.253236630933223
Bdeogale_nigripes_FMNH167685_SRR6053065	Lycaon_pictus	0.242299807031428
Bdeogale_nigripes_FMNH167685_SRR6053065	Lynx_canadensis	0.192065130837271
Bdeogale_nigripes_FMNH167685_SRR6053065	Lynx_lynx	0.188520090126885
Bdeogale_nigripes_FMNH167685_SRR6053065	Lynx_pardinus	0.190718050936551
Bdeogale_nigripes_FMNH167685_SRR6053065	Lynx_rufus	0.190878383830778
Bdeogale_nigripes_FMNH167685_SRR6053065	Manis_javanica	0.284456677271915
Bdeogale_nigripes_FMNH167685_SRR6053065	Martes_americana	0.2399026547343
Bdeogale_nigripes_FMNH167685_SRR6053065	Martes_flavigula	0.240397978025344
Bdeogale_nigripes_FMNH167685_SRR6053065	Martes_foina	0.237907556489402
Bdeogale_nigripes_FMNH167685_SRR6053065	Martes_martes	0.236911980939234
Bdeogale_nigripes_FMNH167685_SRR6053065	Martes_melampus	0.239923108068027
Bdeogale_nigripes_FMNH167685_SRR6053065	Martes_pennanti	0.244471933067347
Bdeogale_nigripes_FMNH167685_SRR6053065	Martes_zibellina	0.238783952250143
Bdeogale_nigripes_FMNH167685_SRR6053065	Meles_anakuma	0.245156278227923
Bdeogale_nigripes_FMNH167685_SRR6053065	Meles_leucurus	0.242115069657954
Bdeogale_nigripes_FMNH167685_SRR6053065	Meles_meles	0.239236727887805
Bdeogale_nigripes_FMNH167685_SRR6053065	Melogale_moschata	0.243720289205708
Bdeogale_nigripes_FMNH167685_SRR6053065	Melursus_ursinus	0.251615295963004
Bdeogale_nigripes_FMNH167685_SRR6053065	Mephitis_mephitis	0.24974323488184
Bdeogale_nigripes_FMNH167685_SRR6053065	Mirounga_leonina	0.225458656635242
Bdeogale_nigripes_FMNH167685_SRR6053065	Mungotictis_decemlineata	0.174741822789151
Bdeogale_nigripes_FMNH167685_SRR6053065	Mustela_altaica	0.244613446872403
Bdeogale_nigripes_FMNH167685_SRR6053065	Mustela_erminea	0.236217264015557
Bdeogale_nigripes_FMNH167685_SRR6053065	Mustela_eversmannii	0.242217088010153
Bdeogale_nigripes_FMNH167685_SRR6053065	Mustela_frenata	0.238051558452752
Bdeogale_nigripes_FMNH167685_SRR6053065	Mustela_itatsi	0.24242932805727
Bdeogale_nigripes_FMNH167685_SRR6053065	Mustela_kathiah	0.245054680118064
Bdeogale_nigripes_FMNH167685_SRR6053065	Mustela_nigripes	0.24104393893104
Bdeogale_nigripes_FMNH167685_SRR6053065	Mustela_nivalis	0.243889455173767
Bdeogale_nigripes_FMNH167685_SRR6053065	Mustela_putorius	0.240824874585644
Bdeogale_nigripes_FMNH167685_SRR6053065	Mustela_sibirica	0.241036686060114
Bdeogale_nigripes_FMNH167685_SRR6053065	Nandinia_binotata	0.181393379514722
Bdeogale_nigripes_FMNH167685_SRR6053065	Nasua_nasua	0.253717938358095
Bdeogale_nigripes_FMNH167685_SRR6053065	Neofelis_nebulosa	0.202940393754396
Bdeogale_nigripes_FMNH167685_SRR6053065	Neomonachus_schauinslandi	0.229861227852126
Bdeogale_nigripes_FMNH167685_SRR6053065	Neophoca_cinerea	0.239140756385924
Bdeogale_nigripes_FMNH167685_SRR6053065	Neovison_vison	0.240486983594023
Bdeogale_nigripes_FMNH167685_SRR6053065	Nyctereutes_procyonoides	0.239747978336439
Bdeogale_nigripes_FMNH167685_SRR6053065	Odobenus_rosmarus_rosmarus	0.259899197350891
Bdeogale_nigripes_FMNH167685_SRR6053065	Otocolobus_manul	0.19563519530774
Bdeogale_nigripes_FMNH167685_SRR6053065	Otocyon_megalotis_megalotis_TS305	0.248599480352935
Bdeogale_nigripes_FMNH167685_SRR6053065	Otocyon_megalotis_virgatus_FMNH158128	0.250008866162515
Bdeogale_nigripes_FMNH167685_SRR6053065	Paguma_larvata	0.196250918013017
Bdeogale_nigripes_FMNH167685_SRR6053065	Panthera_leo	0.199546175684588
Bdeogale_nigripes_FMNH167685_SRR6053065	Panthera_onca	0.199982587817508
Bdeogale_nigripes_FMNH167685_SRR6053065	Panthera_pardus	0.200348768851358
Bdeogale_nigripes_FMNH167685_SRR6053065	Panthera_tigris	0.20500885469376
Bdeogale_nigripes_FMNH167685_SRR6053065	Panthera_uncia	0.204858592850127
Bdeogale_nigripes_FMNH167685_SRR6053065	Paradoxurus_hermaphroditus	0.19982227405882
Bdeogale_nigripes_FMNH167685_SRR6053065	Parahyaena_brunnea_FD126_Fecal	0.188032459557014
Bdeogale_nigripes_FMNH167685_SRR6053065	Pardofelis_marmorata	0.19314973257782
Bdeogale_nigripes_FMNH167685_SRR6053065	Phoca_fasciata	0.225511120151994
Bdeogale_nigripes_FMNH167685_SRR6053065	Phoca_groenlandica	0.229135915627221
Bdeogale_nigripes_FMNH167685_SRR6053065	Phoca_largha	0.227996938561487
Bdeogale_nigripes_FMNH167685_SRR6053065	Phoca_vitulina	0.228929736687013
Bdeogale_nigripes_FMNH167685_SRR6053065	Phocarctos_hookeri	0.240883391700344
Bdeogale_nigripes_FMNH167685_SRR6053065	Prionailurus_bengalensis	0.18702461907528
Bdeogale_nigripes_FMNH167685_SRR6053065	Prionailurus_bengalensis_euptilurus	0.188368983897586
Bdeogale_nigripes_FMNH167685_SRR6053065	Prionailurus_planiceps	0.190756366469403
Bdeogale_nigripes_FMNH167685_SRR6053065	Prionailurus_rubiginosus	0.183632765054126
Bdeogale_nigripes_FMNH167685_SRR6053065	Prionailurus_viverrinus	0.190047646365319
Bdeogale_nigripes_FMNH167685_SRR6053065	Prionodon_pardicolor	0.201618119804448
Bdeogale_nigripes_FMNH167685_SRR6053065	Procyon_lotor	0.243496675606275
Bdeogale_nigripes_FMNH167685_SRR6053065	Profelis_aurata	0.195585843007348
Bdeogale_nigripes_FMNH167685_SRR6053065	Proteles_cristatus_cristatus_TS307	0.199446356417948
Bdeogale_nigripes_FMNH167685_SRR6053065	Proteles_cristatus_septentrionalis_NMS_Z_2018_54	0.201485017400759
Bdeogale_nigripes_FMNH167685_SRR6053065	Puma_concolor	0.191048379587434
Bdeogale_nigripes_FMNH167685_SRR6053065	Puma_yagouaroundi	0.196215323668562
Bdeogale_nigripes_FMNH167685_SRR6053065	Pusa_caspica	0.225701388892827
Bdeogale_nigripes_FMNH167685_SRR6053065	Pusa_hispida	0.224096923333676
Bdeogale_nigripes_FMNH167685_SRR6053065	Pusa_sibirica	0.223862952734888
Bdeogale_nigripes_FMNH167685_SRR6053065	Speothos_venaticus_T1624	0.250590558072342
Bdeogale_nigripes_FMNH167685_SRR6053065	Spilogale_putorius	0.254862080341055
Bdeogale_nigripes_FMNH167685_SRR6053065	Taxidea_taxus	0.232822713931466
Bdeogale_nigripes_FMNH167685_SRR6053065	Tremarctos_ornatus	0.242185451037147
Bdeogale_nigripes_FMNH167685_SRR6053065	Urocyon_cinereoargenteus	0.2528426938781
Bdeogale_nigripes_FMNH167685_SRR6053065	Ursus_americanus	0.243555909064313
Bdeogale_nigripes_FMNH167685_SRR6053065	Ursus_arctos	0.249670139091499
Bdeogale_nigripes_FMNH167685_SRR6053065	Ursus_maritimus	0.247583185951604
Bdeogale_nigripes_FMNH167685_SRR6053065	Ursus_spelaeus	0.245541903914749
Bdeogale_nigripes_FMNH167685_SRR6053065	Ursus_thibetanus	0.242022702012523
Bdeogale_nigripes_FMNH167685_SRR6053065	Urva_javanica	0.1168216855764
Bdeogale_nigripes_FMNH167685_SRR6053065	Viverra_tangalunga_FMNH146957_SRR6053069	0.188204272034283
Bdeogale_nigripes_FMNH167685_SRR6053065	Viverricula_indica	0.186548235940873
Bdeogale_nigripes_FMNH167685_SRR6053065	Vulpes_corsac	0.245908287491292
Bdeogale_nigripes_FMNH167685_SRR6053065	Vulpes_ferrilata	0.250235922835687
Bdeogale_nigripes_FMNH167685_SRR6053065	Vulpes_lagopus	0.246692899749973
Bdeogale_nigripes_FMNH167685_SRR6053065	Vulpes_vulpes_T3611	0.240622381933046
Bdeogale_nigripes_FMNH167685_SRR6053065	Vulpes_zerda	0.24171212831372
Bdeogale_nigripes_FMNH167685_SRR6053065	Zalophus_californianus	0.234362957665786
Callorhinus_ursinus	Canis_anthus	0.248671869864046
Callorhinus_ursinus	Canis_latrans	0.244583915150682
Callorhinus_ursinus	Canis_lupus	0.247604895547815
Callorhinus_ursinus	Caracal_caracal	0.225955041599652
Callorhinus_ursinus	Catopuma_badia	0.232853961421477
Callorhinus_ursinus	Catopuma_temminckii	0.233793765493199
Callorhinus_ursinus	Chrysocyon_brachyurus	0.247749358030255
Callorhinus_ursinus	Civettictis_civetta	0.234955685501634
Callorhinus_ursinus	Conepatus_chinga	0.231439645216304
Callorhinus_ursinus	Crocuta_crocuta	0.235570457748426
Callorhinus_ursinus	Cuon_alpinus	0.253919271323568
Callorhinus_ursinus	Cystophora_cristata	0.176856187367282
Callorhinus_ursinus	Enhydra_lutris	0.230316345032968
Callorhinus_ursinus	Erignathus_barbatus	0.176283860267156
Callorhinus_ursinus	Eumetopias_jubatus	0.113540140601364
Callorhinus_ursinus	Felis_catus	0.233255809421345
Callorhinus_ursinus	Felis_chaus	0.232497509119274
Callorhinus_ursinus	Felis_margarita	0.233146027886159
Callorhinus_ursinus	Felis_nigripes	0.23517570876999
Callorhinus_ursinus	Felis_silvestris	0.23329489052055
Callorhinus_ursinus	Fossa_fossana_FMNH156648_SRR6053060	0.229108418858615
Callorhinus_ursinus	Genetta_servalina	0.231459904088546
Callorhinus_ursinus	Gulo_gulo	0.224670061027408
Callorhinus_ursinus	Halichoerus_grypus	0.180093997489923
Callorhinus_ursinus	Helarctos_malayanus	0.231299653778228
Callorhinus_ursinus	Hyaena_hyaena	0.238128816953664
Callorhinus_ursinus	Hydrurga_leptonyx	0.171422030708966
Callorhinus_ursinus	Leopardus_colocolo	0.22690389269419
Callorhinus_ursinus	Leopardus_geoffroyi	0.230202045245654
Callorhinus_ursinus	Leopardus_guigna	0.230839087256812
Callorhinus_ursinus	Leopardus_jacobita	0.229267002510515
Callorhinus_ursinus	Leopardus_pardalis	0.226581936806962
Callorhinus_ursinus	Leopardus_tigrinus	0.227636610600721
Callorhinus_ursinus	Leopardus_wiedii	0.229364538368165
Callorhinus_ursinus	Leptailurus_serval	0.227603136504211
Callorhinus_ursinus	Leptonychotes_weddellii	0.168483338572331
Callorhinus_ursinus	Lobodon_carcinophaga	0.171797248951218
Callorhinus_ursinus	Lutra_lutra	0.226060175136558
Callorhinus_ursinus	Lutra_sumatrana	0.226696267112201
Callorhinus_ursinus	Lutrogale_perspicillata	0.236344793462505
Callorhinus_ursinus	Lycaon_pictus	0.24654498016307
Callorhinus_ursinus	Lynx_canadensis	0.225803200615523
Callorhinus_ursinus	Lynx_lynx	0.224682910765874
Callorhinus_ursinus	Lynx_pardinus	0.224107349887105
Callorhinus_ursinus	Lynx_rufus	0.227257973933042
Callorhinus_ursinus	Manis_javanica	0.288148829548972
Callorhinus_ursinus	Martes_americana	0.230603319351927
Callorhinus_ursinus	Martes_flavigula	0.224691185802613
Callorhinus_ursinus	Martes_foina	0.2280586490705
Callorhinus_ursinus	Martes_martes	0.226169704162187
Callorhinus_ursinus	Martes_melampus	0.224674396126535
Callorhinus_ursinus	Martes_pennanti	0.23265972627434
Callorhinus_ursinus	Martes_zibellina	0.22782638766888
Callorhinus_ursinus	Meles_anakuma	0.227631943579924
Callorhinus_ursinus	Meles_leucurus	0.225163552472235
Callorhinus_ursinus	Meles_meles	0.22510215554756
Callorhinus_ursinus	Melogale_moschata	0.234192840790745
Callorhinus_ursinus	Melursus_ursinus	0.236363600894264
Callorhinus_ursinus	Mephitis_mephitis	0.234829445151033
Callorhinus_ursinus	Mirounga_leonina	0.176476792742406
Callorhinus_ursinus	Mungotictis_decemlineata	0.235217152419794
Callorhinus_ursinus	Mustela_altaica	0.229162013160324
Callorhinus_ursinus	Mustela_erminea	0.224170364766514
Callorhinus_ursinus	Mustela_eversmannii	0.230668889723445
Callorhinus_ursinus	Mustela_frenata	0.228529582840264
Callorhinus_ursinus	Mustela_itatsi	0.229799896777656
Callorhinus_ursinus	Mustela_kathiah	0.227834552455046
Callorhinus_ursinus	Mustela_nigripes	0.229408397602286
Callorhinus_ursinus	Mustela_nivalis	0.231141283565903
Callorhinus_ursinus	Mustela_putorius	0.227587530418295
Callorhinus_ursinus	Mustela_sibirica	0.228179708753026
Callorhinus_ursinus	Nandinia_binotata	0.220730405401971
Callorhinus_ursinus	Nasua_nasua	0.240077777263767
Callorhinus_ursinus	Neofelis_nebulosa	0.244423615637185
Callorhinus_ursinus	Neomonachus_schauinslandi	0.173451264314785
Callorhinus_ursinus	Neophoca_cinerea	0.121098769183702
Callorhinus_ursinus	Neovison_vison	0.2290486695761
Callorhinus_ursinus	Nyctereutes_procyonoides	0.2436547482295
Callorhinus_ursinus	Odobenus_rosmarus_rosmarus	0.188227176876366
Callorhinus_ursinus	Otocolobus_manul	0.230533079821511
Callorhinus_ursinus	Otocyon_megalotis_megalotis_TS305	0.245819005087137
Callorhinus_ursinus	Otocyon_megalotis_virgatus_FMNH158128	0.245549543562425
Callorhinus_ursinus	Paguma_larvata	0.234758182562948
Callorhinus_ursinus	Panthera_leo	0.235777917505071
Callorhinus_ursinus	Panthera_onca	0.234815055925909
Callorhinus_ursinus	Panthera_pardus	0.241485991299516
Callorhinus_ursinus	Panthera_tigris	0.233203849534657
Callorhinus_ursinus	Panthera_uncia	0.241197911315761
Callorhinus_ursinus	Paradoxurus_hermaphroditus	0.237244252370897
Callorhinus_ursinus	Parahyaena_brunnea_FD126_Fecal	0.236731132753393
Callorhinus_ursinus	Pardofelis_marmorata	0.235677626937257
Callorhinus_ursinus	Phoca_fasciata	0.173318491759481
Callorhinus_ursinus	Phoca_groenlandica	0.176815580695619
Callorhinus_ursinus	Phoca_largha	0.17979059090517
Callorhinus_ursinus	Phoca_vitulina	0.178560060830183
Callorhinus_ursinus	Phocarctos_hookeri	0.127423156496385
Callorhinus_ursinus	Prionailurus_bengalensis	0.225007586101957
Callorhinus_ursinus	Prionailurus_bengalensis_euptilurus	0.228990933030987
Callorhinus_ursinus	Prionailurus_planiceps	0.231517978367152
Callorhinus_ursinus	Prionailurus_rubiginosus	0.228843716286858
Callorhinus_ursinus	Prionailurus_viverrinus	0.231048316029943
Callorhinus_ursinus	Prionodon_pardicolor	0.24102278154192
Callorhinus_ursinus	Procyon_lotor	0.230934774451901
Callorhinus_ursinus	Profelis_aurata	0.234896180227083
Callorhinus_ursinus	Proteles_cristatus_cristatus_TS307	0.240255327323549
Callorhinus_ursinus	Proteles_cristatus_septentrionalis_NMS_Z_2018_54	0.24265543426042
Callorhinus_ursinus	Puma_concolor	0.232703737876813
Callorhinus_ursinus	Puma_yagouaroundi	0.232017252997244
Callorhinus_ursinus	Pusa_caspica	0.179312180550059
Callorhinus_ursinus	Pusa_hispida	0.176075293679016
Callorhinus_ursinus	Pusa_sibirica	0.17685730198659
Callorhinus_ursinus	Speothos_venaticus_T1624	0.254774173332309
Callorhinus_ursinus	Spilogale_putorius	0.234229415142809
Callorhinus_ursinus	Taxidea_taxus	0.217420515765296
Callorhinus_ursinus	Tremarctos_ornatus	0.2305143985771
Callorhinus_ursinus	Urocyon_cinereoargenteus	0.247355629889499
Callorhinus_ursinus	Ursus_americanus	0.231360735274906
Callorhinus_ursinus	Ursus_arctos	0.237473766841705
Callorhinus_ursinus	Ursus_maritimus	0.234639032682539
Callorhinus_ursinus	Ursus_spelaeus	0.234319765596931
Callorhinus_ursinus	Ursus_thibetanus	0.234485047501521
Callorhinus_ursinus	Urva_javanica	0.234992722613077
Callorhinus_ursinus	Viverra_tangalunga_FMNH146957_SRR6053069	0.231579040874541
Callorhinus_ursinus	Viverricula_indica	0.234714928371641
Callorhinus_ursinus	Vulpes_corsac	0.247797934091713
Callorhinus_ursinus	Vulpes_ferrilata	0.248258651134202
Callorhinus_ursinus	Vulpes_lagopus	0.248730641829966
Callorhinus_ursinus	Vulpes_vulpes_T3611	0.247127995440633
Callorhinus_ursinus	Vulpes_zerda	0.246673160420242
Callorhinus_ursinus	Zalophus_californianus	0.112471076771718
Canis_anthus	Canis_latrans	0.0500092141412824
Canis_anthus	Canis_lupus	0.0326830310659574
Canis_anthus	Caracal_caracal	0.241338180184938
Canis_anthus	Catopuma_badia	0.234962721350201
Canis_anthus	Catopuma_temminckii	0.239812033981155
Canis_anthus	Chrysocyon_brachyurus	0.130845684654164
Canis_anthus	Civettictis_civetta	0.238944504666666
Canis_anthus	Conepatus_chinga	0.254353474699112
Canis_anthus	Crocuta_crocuta	0.256258823034714
Canis_anthus	Cuon_alpinus	0.105774264824254
Canis_anthus	Cystophora_cristata	0.236693096136528
Canis_anthus	Enhydra_lutris	0.247851187364077
Canis_anthus	Erignathus_barbatus	0.229036669503957
Canis_anthus	Eumetopias_jubatus	0.245868978525793
Canis_anthus	Felis_catus	0.240720114123427
Canis_anthus	Felis_chaus	0.246095909581808
Canis_anthus	Felis_margarita	0.240831299358486
Canis_anthus	Felis_nigripes	0.241125828923769
Canis_anthus	Felis_silvestris	0.239276951487424
Canis_anthus	Fossa_fossana_FMNH156648_SRR6053060	0.243786008051646
Canis_anthus	Genetta_servalina	0.2430766111654
Canis_anthus	Gulo_gulo	0.246664057124575
Canis_anthus	Halichoerus_grypus	0.23521988100195
Canis_anthus	Helarctos_malayanus	0.247985482116967
Canis_anthus	Hyaena_hyaena	0.250469142751097
Canis_anthus	Hydrurga_leptonyx	0.227071170993585
Canis_anthus	Leopardus_colocolo	0.240719723096643
Canis_anthus	Leopardus_geoffroyi	0.241730461689579
Canis_anthus	Leopardus_guigna	0.245732030041852
Canis_anthus	Leopardus_jacobita	0.247138689197689
Canis_anthus	Leopardus_pardalis	0.241497760377121
Canis_anthus	Leopardus_tigrinus	0.241751711443297
Canis_anthus	Leopardus_wiedii	0.240204847146355
Canis_anthus	Leptailurus_serval	0.235412091254814
Canis_anthus	Leptonychotes_weddellii	0.22413440422511
Canis_anthus	Lobodon_carcinophaga	0.221004143401333
Canis_anthus	Lutra_lutra	0.252663625555813
Canis_anthus	Lutra_sumatrana	0.251387674037336
Canis_anthus	Lutrogale_perspicillata	0.257679005234588
Canis_anthus	Lycaon_pictus	0.121485317385954
Canis_anthus	Lynx_canadensis	0.242826434219049
Canis_anthus	Lynx_lynx	0.238863805665453
Canis_anthus	Lynx_pardinus	0.239750920557734
Canis_anthus	Lynx_rufus	0.24137973025486
Canis_anthus	Manis_javanica	0.308251198239911
Canis_anthus	Martes_americana	0.243583208752462
Canis_anthus	Martes_flavigula	0.237336920495473
Canis_anthus	Martes_foina	0.24312841536325
Canis_anthus	Martes_martes	0.241043551243197
Canis_anthus	Martes_melampus	0.239112924138756
Canis_anthus	Martes_pennanti	0.2412193926437
Canis_anthus	Martes_zibellina	0.241187192195811
Canis_anthus	Meles_anakuma	0.243603676016944
Canis_anthus	Meles_leucurus	0.243006555974247
Canis_anthus	Meles_meles	0.240525379085049
Canis_anthus	Melogale_moschata	0.249290487154
Canis_anthus	Melursus_ursinus	0.250291377489183
Canis_anthus	Mephitis_mephitis	0.250140715486893
Canis_anthus	Mirounga_leonina	0.229713755934175
Canis_anthus	Mungotictis_decemlineata	0.248457243461336
Canis_anthus	Mustela_altaica	0.243623724871294
Canis_anthus	Mustela_erminea	0.235732746105167
Canis_anthus	Mustela_eversmannii	0.242134889665083
Canis_anthus	Mustela_frenata	0.2343228201378
Canis_anthus	Mustela_itatsi	0.242404909198193
Canis_anthus	Mustela_kathiah	0.238114525341214
Canis_anthus	Mustela_nigripes	0.238901792407129
Canis_anthus	Mustela_nivalis	0.240622583110973
Canis_anthus	Mustela_putorius	0.240392009942631
Canis_anthus	Mustela_sibirica	0.240512000339318
Canis_anthus	Nandinia_binotata	0.232897849316906
Canis_anthus	Nasua_nasua	0.258756434671469
Canis_anthus	Neofelis_nebulosa	0.255769322972223
Canis_anthus	Neomonachus_schauinslandi	0.232585873976126
Canis_anthus	Neophoca_cinerea	0.250307896503465
Canis_anthus	Neovison_vison	0.240972674107501
Canis_anthus	Nyctereutes_procyonoides	0.175857369959711
Canis_anthus	Odobenus_rosmarus_rosmarus	0.270276112747476
Canis_anthus	Otocolobus_manul	0.237749506531347
Canis_anthus	Otocyon_megalotis_megalotis_TS305	0.178883656552334
Canis_anthus	Otocyon_megalotis_virgatus_FMNH158128	0.181498992558463
Canis_anthus	Paguma_larvata	0.24154649038345
Canis_anthus	Panthera_leo	0.246812167334036
Canis_anthus	Panthera_onca	0.249374867140224
Canis_anthus	Panthera_pardus	0.247915574361349
Canis_anthus	Panthera_tigris	0.247551640169156
Canis_anthus	Panthera_uncia	0.250310956950693
Canis_anthus	Paradoxurus_hermaphroditus	0.24228018680999
Canis_anthus	Parahyaena_brunnea_FD126_Fecal	0.251269213675505
Canis_anthus	Pardofelis_marmorata	0.245245678576376
Canis_anthus	Phoca_fasciata	0.233539850187311
Canis_anthus	Phoca_groenlandica	0.235635247621425
Canis_anthus	Phoca_largha	0.235894714870153
Canis_anthus	Phoca_vitulina	0.236263452009317
Canis_anthus	Phocarctos_hookeri	0.2600183903888
Canis_anthus	Prionailurus_bengalensis	0.23703545154253
Canis_anthus	Prionailurus_bengalensis_euptilurus	0.238582414102505
Canis_anthus	Prionailurus_planiceps	0.241143969842413
Canis_anthus	Prionailurus_rubiginosus	0.236497918714023
Canis_anthus	Prionailurus_viverrinus	0.243433897451666
Canis_anthus	Prionodon_pardicolor	0.241559328798252
Canis_anthus	Procyon_lotor	0.247723994733117
Canis_anthus	Profelis_aurata	0.241641281977687
Canis_anthus	Proteles_cristatus_cristatus_TS307	0.258961430742302
Canis_anthus	Proteles_cristatus_septentrionalis_NMS_Z_2018_54	0.258481338439491
Canis_anthus	Puma_concolor	0.241012869952032
Canis_anthus	Puma_yagouaroundi	0.238916348271257
Canis_anthus	Pusa_caspica	0.233556852497245
Canis_anthus	Pusa_hispida	0.233805439918918
Canis_anthus	Pusa_sibirica	0.237414270738661
Canis_anthus	Speothos_venaticus_T1624	0.136156311003246
Canis_anthus	Spilogale_putorius	0.246874924098869
Canis_anthus	Taxidea_taxus	0.243710227991591
Canis_anthus	Tremarctos_ornatus	0.252634603788867
Canis_anthus	Urocyon_cinereoargenteus	0.185289183847499
Canis_anthus	Ursus_americanus	0.24613642044535
Canis_anthus	Ursus_arctos	0.251627017590636
Canis_anthus	Ursus_maritimus	0.252353472289664
Canis_anthus	Ursus_spelaeus	0.249377613671185
Canis_anthus	Ursus_thibetanus	0.243888278214526
Canis_anthus	Urva_javanica	0.243212111769169
Canis_anthus	Viverra_tangalunga_FMNH146957_SRR6053069	0.234494881052361
Canis_anthus	Viverricula_indica	0.231695268656282
Canis_anthus	Vulpes_corsac	0.177888670522871
Canis_anthus	Vulpes_ferrilata	0.176725179322134
Canis_anthus	Vulpes_lagopus	0.17877136450713
Canis_anthus	Vulpes_vulpes_T3611	0.178002955726656
Canis_anthus	Vulpes_zerda	0.178106379038639
Canis_anthus	Zalophus_californianus	0.248893681868382
Canis_latrans	Canis_lupus	0.0492600041258489
Canis_latrans	Caracal_caracal	0.239268998198813
Canis_latrans	Catopuma_badia	0.23334528518842
Canis_latrans	Catopuma_temminckii	0.236178890594316
Canis_latrans	Chrysocyon_brachyurus	0.125185606836687
Canis_latrans	Civettictis_civetta	0.233883934878109
Canis_latrans	Conepatus_chinga	0.246428263197356
Canis_latrans	Crocuta_crocuta	0.253970201546472
Canis_latrans	Cuon_alpinus	0.10093056423654
Canis_latrans	Cystophora_cristata	0.22916748689699
Canis_latrans	Enhydra_lutris	0.242256564872033
Canis_latrans	Erignathus_barbatus	0.226386730542888
Canis_latrans	Eumetopias_jubatus	0.244122482488669
Canis_latrans	Felis_catus	0.237655874673781
Canis_latrans	Felis_chaus	0.242356479179331
Canis_latrans	Felis_margarita	0.236219568305473
Canis_latrans	Felis_nigripes	0.23675127935862
Canis_latrans	Felis_silvestris	0.236219568305473
Canis_latrans	Fossa_fossana_FMNH156648_SRR6053060	0.241710111361286
Canis_latrans	Genetta_servalina	0.238987762121918
Canis_latrans	Gulo_gulo	0.240412636081848
Canis_latrans	Halichoerus_grypus	0.230449053474839
Canis_latrans	Helarctos_malayanus	0.243520261878002
Canis_latrans	Hyaena_hyaena	0.249887275012006
Canis_latrans	Hydrurga_leptonyx	0.219853451176773
Canis_latrans	Leopardus_colocolo	0.23915738661555
Canis_latrans	Leopardus_geoffroyi	0.240396887105624
Canis_latrans	Leopardus_guigna	0.241802143225513
Canis_latrans	Leopardus_jacobita	0.243332617364762
Canis_latrans	Leopardus_pardalis	0.237857752532161
Canis_latrans	Leopardus_tigrinus	0.237873261924718
Canis_latrans	Leopardus_wiedii	0.23776704958332
Canis_latrans	Leptailurus_serval	0.234877898388371
Canis_latrans	Leptonychotes_weddellii	0.216628841209122
Canis_latrans	Lobodon_carcinophaga	0.216967669260549
Canis_latrans	Lutra_lutra	0.244140953982867
Canis_latrans	Lutra_sumatrana	0.246531034862856
Canis_latrans	Lutrogale_perspicillata	0.255059163991127
Canis_latrans	Lycaon_pictus	0.116410647162374
Canis_latrans	Lynx_canadensis	0.240753136105015
Canis_latrans	Lynx_lynx	0.236470138427327
Canis_latrans	Lynx_pardinus	0.237575477663823
Canis_latrans	Lynx_rufus	0.236540330744296
Canis_latrans	Manis_javanica	0.305631657577595
Canis_latrans	Martes_americana	0.239123464745811
Canis_latrans	Martes_flavigula	0.233273577502511
Canis_latrans	Martes_foina	0.237566423055614
Canis_latrans	Martes_martes	0.234194055882594
Canis_latrans	Martes_melampus	0.234775651287355
Canis_latrans	Martes_pennanti	0.240131918992259
Canis_latrans	Martes_zibellina	0.234093962034052
Canis_latrans	Meles_anakuma	0.240154727371763
Canis_latrans	Meles_leucurus	0.238276211631908
Canis_latrans	Meles_meles	0.234975143303294
Canis_latrans	Melogale_moschata	0.24432225354838
Canis_latrans	Melursus_ursinus	0.249820504527851
Canis_latrans	Mephitis_mephitis	0.245272233454671
Canis_latrans	Mirounga_leonina	0.227586868321412
Canis_latrans	Mungotictis_decemlineata	0.242136405076402
Canis_latrans	Mustela_altaica	0.238215336991927
Canis_latrans	Mustela_erminea	0.232826679000508
Canis_latrans	Mustela_eversmannii	0.240006586758604
Canis_latrans	Mustela_frenata	0.234347419677758
Canis_latrans	Mustela_itatsi	0.23815928014907
Canis_latrans	Mustela_kathiah	0.235120642200516
Canis_latrans	Mustela_nigripes	0.235815768623946
Canis_latrans	Mustela_nivalis	0.236941068467296
Canis_latrans	Mustela_putorius	0.237498923460523
Canis_latrans	Mustela_sibirica	0.237306671001272
Canis_latrans	Nandinia_binotata	0.228854539034724
Canis_latrans	Nasua_nasua	0.256636111922792
Canis_latrans	Neofelis_nebulosa	0.25286172428809
Canis_latrans	Neomonachus_schauinslandi	0.225881570108342
Canis_latrans	Neophoca_cinerea	0.24947887241946
Canis_latrans	Neovison_vison	0.236374714771524
Canis_latrans	Nyctereutes_procyonoides	0.167652058551223
Canis_latrans	Odobenus_rosmarus_rosmarus	0.266250768135261
Canis_latrans	Otocolobus_manul	0.235780949653104
Canis_latrans	Otocyon_megalotis_megalotis_TS305	0.172864866835507
Canis_latrans	Otocyon_megalotis_virgatus_FMNH158128	0.177120422312505
Canis_latrans	Paguma_larvata	0.236978372870911
Canis_latrans	Panthera_leo	0.243454765535636
Canis_latrans	Panthera_onca	0.243452315963678
Canis_latrans	Panthera_pardus	0.246234397659647
Canis_latrans	Panthera_tigris	0.246454931604951
Canis_latrans	Panthera_uncia	0.246170260354343
Canis_latrans	Paradoxurus_hermaphroditus	0.237355764216485
Canis_latrans	Parahyaena_brunnea_FD126_Fecal	0.249109669403075
Canis_latrans	Pardofelis_marmorata	0.242258223069575
Canis_latrans	Phoca_fasciata	0.228201433469825
Canis_latrans	Phoca_groenlandica	0.229992121451569
Canis_latrans	Phoca_largha	0.231199718920782
Canis_latrans	Phoca_vitulina	0.230380155827655
Canis_latrans	Phocarctos_hookeri	0.256132413565616
Canis_latrans	Prionailurus_bengalensis	0.234409048644422
Canis_latrans	Prionailurus_bengalensis_euptilurus	0.235398930181993
Canis_latrans	Prionailurus_planiceps	0.240608953607184
Canis_latrans	Prionailurus_rubiginosus	0.233984146523292
Canis_latrans	Prionailurus_viverrinus	0.239892449640314
Canis_latrans	Prionodon_pardicolor	0.237811253335819
Canis_latrans	Procyon_lotor	0.243248695558433
Canis_latrans	Profelis_aurata	0.239550653736254
Canis_latrans	Proteles_cristatus_cristatus_TS307	0.254975768381563
Canis_latrans	Proteles_cristatus_septentrionalis_NMS_Z_2018_54	0.254385897110943
Canis_latrans	Puma_concolor	0.235939904882512
Canis_latrans	Puma_yagouaroundi	0.235512474016909
Canis_latrans	Pusa_caspica	0.228559139332894
Canis_latrans	Pusa_hispida	0.228480977459102
Canis_latrans	Pusa_sibirica	0.228757950916965
Canis_latrans	Speothos_venaticus_T1624	0.131163068917726
Canis_latrans	Spilogale_putorius	0.240616845289307
Canis_latrans	Taxidea_taxus	0.241596975155988
Canis_latrans	Tremarctos_ornatus	0.251539309933083
Canis_latrans	Urocyon_cinereoargenteus	0.181971759211421
Canis_latrans	Ursus_americanus	0.24551699555384
Canis_latrans	Ursus_arctos	0.24946475103355
Canis_latrans	Ursus_maritimus	0.248677908052559
Canis_latrans	Ursus_spelaeus	0.248995131158662
Canis_latrans	Ursus_thibetanus	0.24316467465475
Canis_latrans	Urva_javanica	0.240345067316752
Canis_latrans	Viverra_tangalunga_FMNH146957_SRR6053069	0.230005696467937
Canis_latrans	Viverricula_indica	0.229289463494028
Canis_latrans	Vulpes_corsac	0.17177673152066
Canis_latrans	Vulpes_ferrilata	0.171440778629868
Canis_latrans	Vulpes_lagopus	0.173160632069307
Canis_latrans	Vulpes_vulpes_T3611	0.172708336465431
Canis_latrans	Vulpes_zerda	0.173631224340243
Canis_latrans	Zalophus_californianus	0.246690878203642
Canis_lupus	Caracal_caracal	0.233546299869036
Canis_lupus	Catopuma_badia	0.22887269598104
Canis_lupus	Catopuma_temminckii	0.234765617620384
Canis_lupus	Chrysocyon_brachyurus	0.124422393561232
Canis_lupus	Civettictis_civetta	0.233139928125205
Canis_lupus	Conepatus_chinga	0.248802004613542
Canis_lupus	Crocuta_crocuta	0.253651507721581
Canis_lupus	Cuon_alpinus	0.10106355340069
Canis_lupus	Cystophora_cristata	0.230518965128351
Canis_lupus	Enhydra_lutris	0.242702297016551
Canis_lupus	Erignathus_barbatus	0.229206341316065
Canis_lupus	Eumetopias_jubatus	0.24309795529891
Canis_lupus	Felis_catus	0.236972488597419
Canis_lupus	Felis_chaus	0.242558684199063
Canis_lupus	Felis_margarita	0.235318136145185
Canis_lupus	Felis_nigripes	0.236550415297254
Canis_lupus	Felis_silvestris	0.235208040361409
Canis_lupus	Fossa_fossana_FMNH156648_SRR6053060	0.239256880131326
Canis_lupus	Genetta_servalina	0.237000785227287
Canis_lupus	Gulo_gulo	0.239007039314231
Canis_lupus	Halichoerus_grypus	0.228817135229517
Canis_lupus	Helarctos_malayanus	0.245216904157492
Canis_lupus	Hyaena_hyaena	0.245979668711975
Canis_lupus	Hydrurga_leptonyx	0.222478233122159
Canis_lupus	Leopardus_colocolo	0.23382173488896
Canis_lupus	Leopardus_geoffroyi	0.23625098419302
Canis_lupus	Leopardus_guigna	0.238108814375538
Canis_lupus	Leopardus_jacobita	0.240942509323357
Canis_lupus	Leopardus_pardalis	0.236020748878816
Canis_lupus	Leopardus_tigrinus	0.23495877941597
Canis_lupus	Leopardus_wiedii	0.234738791456988
Canis_lupus	Leptailurus_serval	0.231060923050874
Canis_lupus	Leptonychotes_weddellii	0.222374999165645
Canis_lupus	Lobodon_carcinophaga	0.218091875731245
Canis_lupus	Lutra_lutra	0.244973312342892
Canis_lupus	Lutra_sumatrana	0.243705040791205
Canis_lupus	Lutrogale_perspicillata	0.25401197998215
Canis_lupus	Lycaon_pictus	0.11771229763962
Canis_lupus	Lynx_canadensis	0.239217542464772
Canis_lupus	Lynx_lynx	0.237727420640177
Canis_lupus	Lynx_pardinus	0.23820947854704
Canis_lupus	Lynx_rufus	0.239680580557875
Canis_lupus	Manis_javanica	0.30502508222721
Canis_lupus	Martes_americana	0.239791170164424
Canis_lupus	Martes_flavigula	0.235086116308195
Canis_lupus	Martes_foina	0.237898796212103
Canis_lupus	Martes_martes	0.23640229619493
Canis_lupus	Martes_melampus	0.233913992621078
Canis_lupus	Martes_pennanti	0.241234736530673
Canis_lupus	Martes_zibellina	0.235528050165543
Canis_lupus	Meles_anakuma	0.241046275368794
Canis_lupus	Meles_leucurus	0.237614252135397
Canis_lupus	Meles_meles	0.236475288532213
Canis_lupus	Melogale_moschata	0.243475691591441
Canis_lupus	Melursus_ursinus	0.249109325517957
Canis_lupus	Mephitis_mephitis	0.245121700270227
Canis_lupus	Mirounga_leonina	0.224506213504948
Canis_lupus	Mungotictis_decemlineata	0.243762531112228
Canis_lupus	Mustela_altaica	0.235577388468058
Canis_lupus	Mustela_erminea	0.228420590766989
Canis_lupus	Mustela_eversmannii	0.2351300393518
Canis_lupus	Mustela_frenata	0.227877340026608
Canis_lupus	Mustela_itatsi	0.235376359366351
Canis_lupus	Mustela_kathiah	0.231642512354083
Canis_lupus	Mustela_nigripes	0.231411635060501
Canis_lupus	Mustela_nivalis	0.231655052975863
Canis_lupus	Mustela_putorius	0.232752829079593
Canis_lupus	Mustela_sibirica	0.232779335636598
Canis_lupus	Nandinia_binotata	0.227732372116886
Canis_lupus	Nasua_nasua	0.257550273285124
Canis_lupus	Neofelis_nebulosa	0.251633315031653
Canis_lupus	Neomonachus_schauinslandi	0.226795453848892
Canis_lupus	Neophoca_cinerea	0.250570080844645
Canis_lupus	Neovison_vison	0.233780642015868
Canis_lupus	Nyctereutes_procyonoides	0.171236342360026
Canis_lupus	Odobenus_rosmarus_rosmarus	0.264763161591024
Canis_lupus	Otocolobus_manul	0.232378829415805
Canis_lupus	Otocyon_megalotis_megalotis_TS305	0.178439492071846
Canis_lupus	Otocyon_megalotis_virgatus_FMNH158128	0.178207481288034
Canis_lupus	Paguma_larvata	0.234107838036534
Canis_lupus	Panthera_leo	0.243182409630352
Canis_lupus	Panthera_onca	0.244835470348529
Canis_lupus	Panthera_pardus	0.243720289205708
Canis_lupus	Panthera_tigris	0.244722787741587
Canis_lupus	Panthera_uncia	0.246908858193572
Canis_lupus	Paradoxurus_hermaphroditus	0.238218670279836
Canis_lupus	Parahyaena_brunnea_FD126_Fecal	0.248568243569293
Canis_lupus	Pardofelis_marmorata	0.241714103874098
Canis_lupus	Phoca_fasciata	0.231087593703835
Canis_lupus	Phoca_groenlandica	0.232514616996478
Canis_lupus	Phoca_largha	0.230719478773844
Canis_lupus	Phoca_vitulina	0.230888290688046
Canis_lupus	Phocarctos_hookeri	0.257138973454682
Canis_lupus	Prionailurus_bengalensis	0.232054096154391
Canis_lupus	Prionailurus_bengalensis_euptilurus	0.234227938430941
Canis_lupus	Prionailurus_planiceps	0.236883364386988
Canis_lupus	Prionailurus_rubiginosus	0.233655199143006
Canis_lupus	Prionailurus_viverrinus	0.240448005253025
Canis_lupus	Prionodon_pardicolor	0.241133892653488
Canis_lupus	Procyon_lotor	0.239583234290907
Canis_lupus	Profelis_aurata	0.235127314039385
Canis_lupus	Proteles_cristatus_cristatus_TS307	0.255225151886443
Canis_lupus	Proteles_cristatus_septentrionalis_NMS_Z_2018_54	0.255544596656794
Canis_lupus	Puma_concolor	0.236219568305473
Canis_lupus	Puma_yagouaroundi	0.234891151793951
Canis_lupus	Pusa_caspica	0.226604500581174
Canis_lupus	Pusa_hispida	0.22794339101416
Canis_lupus	Pusa_sibirica	0.230021032057179
Canis_lupus	Speothos_venaticus_T1624	0.137471861144668
Canis_lupus	Spilogale_putorius	0.241672777257357
Canis_lupus	Taxidea_taxus	0.238214107658694
Canis_lupus	Tremarctos_ornatus	0.250278275216728
Canis_lupus	Urocyon_cinereoargenteus	0.183887426593
Canis_lupus	Ursus_americanus	0.245211283918499
Canis_lupus	Ursus_arctos	0.247475665310199
Canis_lupus	Ursus_maritimus	0.248563791881803
[truncated: 8,012 more rows]
