# Supplementary material for: High-quality carnivoran genomes from roadkill samples enable comparative species delineation in aardwolf and bat-eared fox
Source: eLife. 2021 Feb 18;10:e63167. doi: 10.7554/eLife.63167 (PMC7963486; doi:10.7554/eLife.63167)
Supplement: Supplementary file 2. — Divergence time estimates based on UGAM and LN models are reported with associated 95% credibility intervals for each MCMC chain. [file elife-63167-supp2.xlsx]

## Sheet: Feuille1
Species pair	LN			UGAM
	Chain 1	Chain 2	Chain 3	Chain 1	Chain 2	Chain 3
Proteles cristata/ Proteles septentrionalis	1.228 [IC 95%: 5.34 – 0.58]	1.014 [IC 95%: 3.01 – 0.56]	0.841 [IC 95%: 1.26 – 0.55]	1.327 [IC 95%: 1.86 – 0.93]	1.335 [IC 95%: 1.86 – 0.94]	1.34 [IC 95%: 1.88 – 0.94]
Otocyon megalotis megalotis/ Otocyon megalotis virgatus	1.295 [IC 95%: 6.72 – 0.43]	1.007 [IC 95%: 2.61 – 0.52]	0.865 [IC 95%: 1.45– 0.48]	0.569 [IC 95%: 0.81 – 0.39]	0.573 [IC 95%: 0.83 – 0.39]	0.57 [IC 95%: 0.82 – 0.40]
