# Supplementary material for: High-quality carnivoran genomes from roadkill samples enable comparative species delineation in aardwolf and bat-eared fox
Source: eLife. 2021 Feb 18;10:e63167. doi: 10.7554/eLife.63167 (PMC7963486; doi:10.7554/eLife.63167)
Supplement: Supplementary file 3. — (Number of contigs/scaffolds and associated N50 values) for the 503 mammalian assemblies retrieved from NCBI (https://www.ncbi.nlm.nih.gov/assembly) on August 13th, 2019 with filters: ‘Exclude derived from surveillance project’, ‘Exclude anomalous’, ‘Exclude partial’, and using only the RefSeq assembly for Homo sapiens. [file elife-63167-supp3.xlsx]

## Sheet: 503_assemblies
Accession	Name	Species	Clade	Order	Status	ReleaseDate	LastUpdateDate	ScaffoldN50	ContigN50	ScaffoldCount	ContigCount	Total length	Submitter
GCF_000296735.1	ChrAsi1.0	Chrysochloris asiatica	Afrotheria	Afrosoricida	Scaffold	2012-09-20	2014-02-19	13470186	19631	20500	391344	4210110458	Broad Institute
GCA_004027935.1	ChrAsi_v1_BIUU	Chrysochloris asiatica	Afrotheria	Afrosoricida	Scaffold	2019-01-16	2019-01-16	6492	6444	3428078	3432954	4750461421	Broad Institute
GCA_000313985.2	ASM31398v2	Echinops telfairi	Afrotheria	Afrosoricida	Scaffold	2019-07-16	2019-07-17	54422506	20425	7489	277895	2947103070	Broad Institute
GCA_004026705.1	MicTal_v1_BIUU	Microgale talazaci	Afrotheria	Afrosoricida	Scaffold	2019-01-16	2019-01-16	65143	56946	788895	795514	3236147583	Broad Institute
GCA_004026845.1	HetBruBak_v1_BIUU	Heterohyrax brucei	Afrotheria	Hyracoidea	Scaffold	2019-01-16	2019-01-16	67904	62841	967933	971748	3618151652	Broad Institute
GCA_004026925.2	ProCapCap_v2_BIUU_UCD	Procavia capensis	Afrotheria	Hyracoidea	Scaffold	2019-07-15	2019-07-17	9071062	38095	826553	1044315	3897621025	Broad Institute
GCA_000152225.2	Pcap_2.0	Procavia capensis	Afrotheria	Hyracoidea	Scaffold	2014-12-16	2014-12-16	905827	35792	65694	325568	3602182911	Baylor College of Medicine
GCF_000299155.1	EleEdw1.0	Elephantulus edwardii	Afrotheria	Macroscelidea	Scaffold	2012-10-12	2014-02-19	15011382	24219	8768	288162	3843982861	Broad Institute
GCA_004027355.1	EleEdw_v1_BIUU	Elephantulus edwardii	Afrotheria	Macroscelidea	Scaffold	2019-01-16	2019-01-16	17713	16488	2475866	2486023	4288896762	Broad Institute
GCF_000001905.1	Loxafr3.0	Loxodonta africana	Afrotheria	Proboscidea	Scaffold	2009-08-12	2013-12-16	46401353	69023	2352	95866	3196738102	Broad Institute
GCF_000243295.1	TriManLat1.0	Trichechus manatus	Afrotheria	Sirenia	Scaffold	2012-01-23	2015-05-26	14442683	37750	6323	166490	3103808406	Broad Institute
GCF_000298275.1	OryAfe1.0	Orycteropus afer	Afrotheria	Tubulidentata	Scaffold	2012-09-20	2014-05-14	7875832	17683	22509	433653	4444080527	Broad Institute
GCA_004365145.1	OryAfe_v1_BIUU	Orycteropus afer	Afrotheria	Tubulidentata	Scaffold	2019-03-22	2019-03-25	22965	20354	2675444	2690873	4687958587	Broad Institute
GCA_004027255.2	GalVar_v2_BIUU_UCD	Galeopterus variegatus	Euarchontoglires	Dermoptera	Scaffold	2019-07-15	2019-07-17	7885395	34666	1523781	1653516	3349451543	Broad Institute
GCF_000696425.1	G_variegatus-3.0.2	Galeopterus variegatus	Euarchontoglires	Dermoptera	Scaffold	2014-06-06	2017-11-30	245189	20752	179514	511878	3187660572	Washington University (WashU)
GCA_004026855.1	LepAme_v1_BIUU	Lepus americanus	Euarchontoglires	Lagomorpha	Scaffold	2019-01-16	2019-01-16	16725	15057	1592829	1602982	3123271264	Broad Institute
GCF_000292845.1	OchPri3.0	Ochotona princeps	Euarchontoglires	Lagomorpha	Scaffold	2012-08-27	2018-11-07	26863993	42347	10421	132963	2229840584	Broad Institute
GCA_000164825.1	ASM16482v1	Ochotona princeps	Euarchontoglires	Lagomorpha	Scaffold	2010-10-16	2016-11-29	88760	3265	187558	717779	3445784354	Broad Institute
GCF_000260255.1	OctDeg1.0	Octodon degus	Euarchontoglires	Lagomorpha	Scaffold	2012-05-01	2013-05-29	12091372	19847	7135	259905	2995889303	Broad Institute
GCF_000003625.3	OryCun2.0	Oryctolagus cuniculus	Euarchontoglires	Lagomorpha	Chromosome	2009-10-29	2014-06-05	35972871	64648	3241	84024	2737462810	The Genome Sequencing Platform, The Assembly Computation and Development Core Team
GCA_004027835.1	AloPal_v1_BIUU	Alouatta palliata	Euarchontoglires	Primates	Scaffold	2019-01-16	2019-01-16	72427	51304	1136565	1152695	3033617595	Broad Institute
GCF_000952055.2	Anan_2.0	Aotus nancymaae	Euarchontoglires	Primates	Scaffold	2017-06-12	2017-06-28	8268663	126456	28922	112851	2861684817	Baylor College of Medicine
GCA_004024785.1	AteGeo_v1_BIUU	Ateles geoffroyi	Euarchontoglires	Primates	Scaffold	2019-01-15	2019-01-15	73111	59033	869075	878490	2897033911	Broad Institute
GCA_002754865.1	ASM275486v1	Callithrix jacchus	Euarchontoglires	Primates	Scaffold	2017-11-06	2017-11-06	129239660	155284	39944	88439	2845375248	Broad Institute
GCF_000004665.1	Callithrix jacchus-3.2	Callithrix jacchus	Euarchontoglires	Primates	Chromosome	2010-01-25	2016-08-29	5167444	29273	14205	201371	2914958544	Washington University (WashU)
GCA_001269965.1	CIEA01	Callithrix jacchus	Euarchontoglires	Primates	Contig	2015-08-18	2015-08-18	61041	61041	109198	109198	2620625188	Department of Biosciences and Informatics, Keio University
GCA_000832365.1	ASM83236v1	Callithrix jacchus	Euarchontoglires	Primates	Contig	2015-02-05	2015-02-05	859	859	1992178	1992178	1504610980	UN-NHPGC
GCF_000164805.1	Tarsius_syrichta-2.0.1	Carlito syrichta	Euarchontoglires	Primates	Scaffold	2013-09-18	2017-07-15	401181	38165	337189	492903	3453864774	Washington University (WashU)
GCA_004027755.1	CebAlb_v1_BIUU	Cebus albifrons	Euarchontoglires	Primates	Scaffold	2019-01-16	2019-01-16	31156	25652	1539166	1552889	3058667321	Broad Institute
GCF_001604975.1	Cebus_imitator-1.0	Cebus capucinus	Euarchontoglires	Primates	Scaffold	2016-04-05	2016-07-18	5274112	41196	7156	140597	2717703182	McDonnell Genome Institute - Washington University School of Medicine
GCF_000955945.1	Caty_1.0	Cercocebus atys	Euarchontoglires	Primates	Scaffold	2015-03-19	2015-03-30	12849131	112942	11433	76752	2848246356	Human Genome Sequencing Center - BCM
GCA_004027615.1	CertNeg_v1_BIUU	Cercopithecus neglectus	Euarchontoglires	Primates	Scaffold	2019-01-16	2019-01-16	10270	9789	2119200	2126734	3278860052	Broad Institute
GCA_004024725.1	CheMed_v1_BIUU	Cheirogaleus medius	Euarchontoglires	Primates	Scaffold	2019-01-15	2019-01-15	118572	90923	547751	555280	2393092913	Broad Institute
GCF_000409795.2	Chlorocebus_sabeus 1.1	Chlorocebus sabaeus	Euarchontoglires	Primates	Chromosome	2014-03-25	2017-12-08	81825804	90449	2004	162724	2789656328	Vervet Genomics Consortium
GCF_000951035.1	Cang.pa_1.0	Colobus angolensis	Euarchontoglires	Primates	Scaffold	2015-03-12	2015-03-30	7840981	38363	13124	197124	2970124662	Baylor College of Medicine
GCA_004027145.1	DauMad_v1_BIUU	Daubentonia madagascariensis	Euarchontoglires	Primates	Scaffold	2019-01-16	2019-01-16	379919	298834	342451	344978	2498418007	Broad Institute
GCA_000241425.1	DauMad_1.0	Daubentonia madagascariensis	Euarchontoglires	Primates	Scaffold	2012-01-05	2016-11-30	3653	3358	3231305	3527892	2855365987	Weill Cornell Medical College
GCA_004027335.1	EryPat_v1_BIUU	Erythrocebus patas	Euarchontoglires	Primates	Scaffold	2019-01-16	2019-01-16	34535	28523	2563960	2577035	3490485286	Broad Institute
GCA_001262665.1	Eflavifronsk33QCA	Eulemur flavifrons	Euarchontoglires	Primates	Scaffold	2015-08-06	2015-08-06	413352	27331	38367	170563	2115568035	University of Chicago
GCA_004027275.1	EulFul_v1_BIUU	Eulemur fulvus	Euarchontoglires	Primates	Scaffold	2019-01-16	2019-01-16	22561	21310	1693913	1697619	2748885701	Broad Institute
GCA_001262655.1	Emacaco_refEf_BWA_oneround	Eulemur macaco	Euarchontoglires	Primates	Scaffold	2015-08-06	2015-08-06	405987	20038	26772	259238	2119875225	University of Chicago
GCF_000151905.2	gorGor4	Gorilla gorilla	Euarchontoglires	Primates	Chromosome	2015-10-15	2017-12-27	81227029	52934	40711	170105	3063362794	Wellcome Trust Sanger Institute
GCA_900006655.3	Susie3	Gorilla gorilla	Euarchontoglires	Primates	Chromosome	2017-10-02	2017-10-02	20634945	9406846	15297	16065	3084595669	UNIVERSITY OF WASHINGTON
GCF_000001405.39	GRCh38.p13	Homo sapiens	Euarchontoglires	Primates	Chromosome	2019-03-01	2019-06-14	59364414	56413054	639	1580	3272089205	Genome Reference Consortium
GCA_004363605.1	IndInd_v1_BIUU	Indri indri	Euarchontoglires	Primates	Scaffold	2019-03-22	2019-03-22	28620	26447	1243540	1248425	2701849413	Broad Institute
GCA_004024665.1	LemCat_v1_BIUU	Lemur catta	Euarchontoglires	Primates	Scaffold	2019-01-15	2019-01-15	215715	158439	575427	580026	2298449872	Broad Institute
GCA_000222185.1	MacFas_Jun2011	Macaca fascicularis	Euarchontoglires	Primates	Chromosome	2011-08-09	2016-11-30	155658674	3658	21	1628360	2878471044	F. Hoffmann-La Roche Ltd
GCF_000364345.1	Macaca_fascicularis_5.0	Macaca fascicularis	Euarchontoglires	Primates	Chromosome	2013-06-12	2017-12-08	88649475	86040	7601	87764	2946843737	Washington University (WashU)
GCA_000230815.1	CE_1.0	Macaca fascicularis	Euarchontoglires	Primates	Chromosome	2011-10-20	2016-11-30	1141162	13209	39921	439237	3126563191	Beijing Genomics Institute
GCA_003118495.1	macFus_1.0	Macaca fuscata	Euarchontoglires	Primates	Contig	2018-05-11	2018-05-11	94905	94905	90905	90905	2930706173	National Institutes of Natural Sciences
GCF_003339765.1	Mmul_10	Macaca mulatta	Euarchontoglires	Primates	Chromosome	2019-03-13	2019-04-26	82346004	46608966	2939	3182	2971331530	The Genome Institute at Washington University School of Medicine
GCA_005453305.1	ASM545330v1	Macaca mulatta	Euarchontoglires	Primates	Contig	2019-05-17	2019-05-17	8424208	8424208	1633	1633	2832421508	None
GCF_000002255.3	Mmul_051212	Macaca mulatta	Euarchontoglires	Primates	Chromosome	2015-06-24	2015-12-28	6094595	25707	122145	301015	3097387291	Macaca mulatta Genome Sequencing Consortium
GCF_000772875.2	Mmul_8.0.1	Macaca mulatta	Euarchontoglires	Primates	Chromosome	2015-12-01	2019-04-29	4193270	107156	284728	348494	3236224332	Baylor College of Medicine Genome Sequencing Center
GCA_000230795.1	CR_1.0	Macaca mulatta	Euarchontoglires	Primates	Chromosome	2011-10-20	2016-11-30	1660975	12841	34102	448689	2969971616	Beijing Genomics Institute
GCA_005453525.2	ASM545352v2	Macaca mulatta	Euarchontoglires	Primates	Contig	2019-07-25	2019-07-26	451490	451490	10217	10217	2179644428	None
GCF_000956065.1	Mnem_1.0	Macaca nemestrina	Euarchontoglires	Primates	Scaffold	2015-03-19	2015-03-30	15219753	106897	9733	94057	2948703511	Baylor College of Medicine
GCF_000951045.1	Mleu.le_1.0	Mandrillus leucophaeus	Euarchontoglires	Primates	Scaffold	2015-03-12	2015-03-30	3186748	31346	12821	246054	3061992840	Baylor College of Medicine
GCA_004802615.1	BGI_mandrill_1.0	Mandrillus sphinx	Euarchontoglires	Primates	Scaffold	2019-04-22	2019-04-22	3577924	21683	53550	282778	2860576561	BGI
GCF_000165445.2	Mmur_3.0	Microcebus murinus	Euarchontoglires	Primates	Chromosome	2017-02-06	2017-05-10	108171978	210702	7678	50984	2487409138	Baylor College of Medicine
GCA_004024645.1	MizCoq_v1_BIUU	Mirza coquereli	Euarchontoglires	Primates	Scaffold	2019-01-15	2019-01-15	79947	60596	440879	451546	2340865962	Broad Institute
GCA_000772465.1	Charlie1.0	Nasalis larvatus	Euarchontoglires	Primates	Chromosome	2014-11-12	2017-12-01	137426304	13295	319549	553412	3011966170	Proboscis Monkey Functional Genome Consortium
GCA_004027105.1	NasLar_v1_BIUU	Nasalis larvatus	Euarchontoglires	Primates	Scaffold	2019-01-16	2019-01-16	44943	34532	923815	942104	3050434315	Broad Institute
GCF_000146795.2	Nleu_3.0	Nomascus leucogenys	Euarchontoglires	Primates	Chromosome	2012-12-10	2013-12-05	52956880	35148	17484	197900	2962060179	Gibbon Genome Sequencing Consortium
GCA_006542625.1	Asia_NLE_v1	Nomascus leucogenys	Euarchontoglires	Primates	Chromosome	2019-07-02	2019-07-02	35886894	12782853	2251	2760	2843966406	University of Washington
GCA_004027815.1	NycCou_v1_BIUU	Nycticebus coucang	Euarchontoglires	Primates	Scaffold	2019-01-16	2019-01-16	19724	17693	1937143	1946791	3294558825	Broad Institute
GCF_000181295.1	OtoGar3	Otolemur garnettii	Euarchontoglires	Primates	Scaffold	2011-03-16	2013-11-26	13852661	27100	7793	200240	2519724550	Broad Institute of MIT and Harvard, USA, Cambridge
GCF_000258655.2	panpan1.1	Pan paniscus	Euarchontoglires	Primates	Chromosome	2015-08-18	2018-01-12	8197324	66676	10274	121356	3286643896	Max-Planck Institute for Evolutionary Anthropology
GCF_002880755.1	Clint_PTRv2	Pan troglodytes	Euarchontoglires	Primates	Chromosome	2018-01-19	2018-04-03	53103722	12268567	4346	5061	3050398082	University of Washington
GCF_000001515.7	Pan_tro 3.0	Pan troglodytes	Euarchontoglires	Primates	Chromosome	2016-05-03	2018-03-27	26972556	384816	44449	72226	3231170666	Chimpanzee Sequencing and Analysis Consortium
GCA_000325845.1	ASM32584v1	Pan troglodytes	Euarchontoglires	Primates	Contig	2012-12-19	2012-12-19	15702	15702	361864	361864	2733948177	Chimpanzee Sequencing and Analysis Consortium
GCF_000264685.3	Panu_3.0	Papio anubis	Euarchontoglires	Primates	Chromosome	2017-04-27	2017-07-26	585721	149817	63235	118811	2959373024	Human Genome Sequencing Center
GCF_002776525.2	ASM277652v2	Piliocolobus tephrosceles	Euarchontoglires	Primates	Scaffold	2018-09-11	2018-09-25	13534873	98446	47449	111069	3038007327	University of Oregon
GCA_004026645.1	PitPit_v1_BIUU	Pithecia pithecia	Euarchontoglires	Primates	Scaffold	2019-01-16	2019-01-16	83104	63292	892330	903646	2933562501	Broad Institute
GCA_004027715.1	CalDon_v1_BIUU	Plecturocebus donacophilus	Euarchontoglires	Primates	Scaffold	2019-01-16	2019-01-16	46445	41149	1033983	1041365	2959764160	Broad Institute
GCF_002880775.1	Susie_PABv2	Pongo abelii	Euarchontoglires	Primates	Chromosome	2018-01-19	2018-12-05	98475126	11074009	5261	5814	3065052215	University of Washington
GCA_000001545.3	P_pygmaeus_2.0.2	Pongo abelii	Euarchontoglires	Primates	Chromosome	2013-11-18	2013-11-19	747460	15648	61538	408559	3441240245	Orangutan Genome Sequencing Consortium
GCA_003258685.1	Prosim_1.0	Prolemur simus	Euarchontoglires	Primates	Scaffold	2018-06-20	2018-06-20	2710671	47757	128596	208899	2411593676	Henry Doorly Zoo &amp; Aquarium
GCF_000956105.1	Pcoq_1.0	Propithecus coquereli	Euarchontoglires	Primates	Scaffold	2015-03-23	2015-06-01	5604909	28129	22539	299070	2798152141	Baylor College of Medicine
GCA_004024825.1	PygNem_v1_BIUU	Pygathrix nemaeus	Euarchontoglires	Primates	Scaffold	2019-01-15	2019-01-15	68569	51434	1431093	1445731	3217150031	Broad Institute
GCF_001698545.1	ASM169854v1	Rhinopithecus bieti	Euarchontoglires	Primates	Scaffold	2016-08-03	2016-08-25	2225337	36417	105032	226509	2977074946	Laboratory for conservation and utilization of Bio-resource
GCA_007565055.1	ASM756505v1	Rhinopithecus roxellana	Euarchontoglires	Primates	Chromosome	2019-07-29	2019-07-29	144559847	5723610	3256	6088	3038460517	Northwest University
GCF_000769185.1	Rrox_v1	Rhinopithecus roxellana	Euarchontoglires	Primates	Scaffold	2014-10-29	2017-12-08	1549224	77151	135512	196797	2899552139	Novogene
GCA_004024885.1	SagImp_v1_BIUU	Saguinus imperator	Euarchontoglires	Primates	Scaffold	2019-01-15	2019-01-15	65636	53787	1666189	1675070	3493717886	Broad Institute
GCF_000235385.1	SaiBol1.0	Saimiri boliviensis	Euarchontoglires	Primates	Scaffold	2011-11-18	2013-12-16	18744880	38823	2686	151414	2608588537	Broad Institute
GCA_004025065.1	SemEnt_v1_BIUU	Semnopithecus entellus	Euarchontoglires	Primates	Scaffold	2019-01-15	2019-01-15	29955	25064	1063749	1077535	3033044217	Broad Institute
GCF_003255815.1	Tgel_1.0	Theropithecus gelada	Euarchontoglires	Primates	Chromosome	2018-06-19	2018-06-29	130230028	310061	15308	35108	2889630685	Kenneth Chiou's shared submissions
GCA_004027535.1	AcoCah_v1_BIUU	Acomys cahirinus	Euarchontoglires	Rodentia	Scaffold	2019-01-16	2019-01-16	65411	42476	371342	391811	2306070819	Broad Institute
GCA_004027895.1	AllBul_v1_BIUU	Allactaga bullata	Euarchontoglires	Rodentia	Scaffold	2019-01-16	2019-01-16	36308	30651	1284382	1295369	3093575781	Broad Institute
GCA_004027875.1	AplRuf_v1_BIUU	Aplodontia rufa	Euarchontoglires	Rodentia	Scaffold	2019-01-16	2019-01-16	37811	33245	1279526	1286779	3005535537	Broad Institute
GCA_002335545.1	Aspe_assembly01	Apodemus speciosus	Euarchontoglires	Rodentia	Scaffold	2017-09-21	2019-08-06	49031	4003	336124	609619	3494287372	University of the Ryukyus
GCA_001305905.1	ASM130590v1	Apodemus sylvaticus	Euarchontoglires	Rodentia	Scaffold	2015-10-02	2015-10-02	245982	1208	559629	3342720	3758143898	University of Liverpool
GCA_004027915.1	CapPil_v1_BIUU	Capromys pilorides	Euarchontoglires	Rodentia	Scaffold	2019-01-16	2019-01-16	4081	4080	2352358	2355850	3023850356	Broad Institute
GCF_001984765.1	C.can genome v1.0	Castor canadensis	Euarchontoglires	Rodentia	Scaffold	2017-02-04	2017-02-17	317708	273954	21157	24477	2518306565	Hospital for Sick Children
GCA_900168385.1	bgp_v1	Castor canadensis	Euarchontoglires	Rodentia	Scaffold	2017-05-03	2019-08-06	295259	2701	629174	1785190	4167116470	OREGON STATE UNIVERSITY
GCA_004027675.1	CasCan_v1_BIUU	Castor canadensis	Euarchontoglires	Rodentia	Scaffold	2019-01-16	2019-01-16	55723	49369	832147	837916	2761481163	Broad Institute
GCA_000688575.1	CavAp1.0	Cavia aperea	Euarchontoglires	Rodentia	Scaffold	2014-05-09	2014-05-09	27928671	1039	3131	2319938	2716396567	Leibniz Institute for Zoo and Wildlife research
GCF_000151735.1	Cavpor3.0	Cavia porcellus	Euarchontoglires	Rodentia	Scaffold	2010-10-09	2018-01-12	27942054	80583	3144	61604	2723219641	The Genome Sequencing Platform, The Genome Assembly Team
GCA_004027695.1	CavTsc_v1_BIUU	Cavia tschudii	Euarchontoglires	Rodentia	Scaffold	2019-01-16	2019-01-16	91436	64807	1368179	1379500	3077352510	Broad Institute
GCF_000276665.1	ChiLan1.0	Chinchilla lanigera	Euarchontoglires	Rodentia	Scaffold	2012-07-09	2013-08-27	21893125	61105	2839	81656	2390868971	Broad Institute
GCA_004027575.1	CriGam_v1_BIUU	Cricetomys gambianus	Euarchontoglires	Rodentia	Scaffold	2019-01-16	2019-01-16	110049	80761	1102952	1110425	2397721602	Broad Institute
GCA_900186095.1	CHOK1S_HZDv1	Cricetulus griseus	Euarchontoglires	Rodentia	Scaffold	2017-10-31	2017-10-31	62039716	97133	8264	71598	2358151106	Eagle Genomics Ltd
GCF_003668045.1	CriGri-PICR	Cricetulus griseus	Euarchontoglires	Rodentia	Scaffold	2018-10-23	2018-12-18	19581774	2098530	1831	4826	2368923191	CHO Genome Community
GCF_000419365.1	C_griseus_v1.0	Cricetulus griseus	Euarchontoglires	Rodentia	Scaffold	2013-07-12	2018-12-26	1558295	27129	52710	218862	2360130144	Beijing Genomics Institution-shenzhen
GCA_000448345.1	Cgr1.0	Cricetulus griseus	Euarchontoglires	Rodentia	Scaffold	2013-08-30	2013-09-03	1236516	11899	28749	319219	2332774290	CeBiTec, Bielefeld University
GCF_000223135.1	CriGri_1.0	Cricetulus griseus	Euarchontoglires	Rodentia	Scaffold	2011-08-26	2017-12-27	1147233	39361	109152	265787	2399786748	Beijing Genomics Institute
GCA_004027205.1	CteGun_v1_BIUU	Ctenodactylus gundi	Euarchontoglires	Rodentia	Scaffold	2019-01-16	2019-01-16	354548	218543	860073	865110	2322471743	Broad Institute
GCA_004027165.1	CteSoc_v1_BIUU	Ctenomys sociabilis	Euarchontoglires	Rodentia	Scaffold	2019-01-16	2019-01-16	49073	37562	807571	823762	2834814551	Broad Institute
GCA_004365215.1	CunPac_v1_BIUU	Cuniculus paca	Euarchontoglires	Rodentia	Scaffold	2019-03-22	2019-03-25	3892	3890	3768450	3771510	3399583187	Broad Institute
GCA_004363535.1	DasPun_v1_BIUU	Dasyprocta punctata	Euarchontoglires	Rodentia	Scaffold	2019-03-22	2019-03-22	43703	38650	986664	993123	3012098298	Broad Institute
GCA_004027595.1	DinBra_v1_BIUU	Dinomys branickii	Euarchontoglires	Rodentia	Scaffold	2019-01-16	2019-01-16	77918	64805	1158438	1164830	2688563719	Broad Institute
GCF_000151885.1	Dord_2.0	Dipodomys ordii	Euarchontoglires	Rodentia	Scaffold	2014-12-12	2015-07-07	11931245	48087	65193	148226	2236368823	Baylor College of Medicine
GCA_004024685.1	DipSte_v1_BIUU	Dipodomys stephensi	Euarchontoglires	Rodentia	Scaffold	2019-01-15	2019-01-15	36811	30710	1269643	1278525	2346418196	Broad Institute
GCA_004027295.1	DolPat_v1_BIUU	Dolichotis patagonum	Euarchontoglires	Rodentia	Scaffold	2019-01-16	2019-01-16	31026	27983	1905764	1911987	3289614431	Broad Institute
GCA_001685075.1	ASM168507v1	Ellobius lutescens	Euarchontoglires	Rodentia	Scaffold	2016-07-14	2019-08-06	242123	11648	58423	355225	2353188398	Erasmus medical center (ErasmusMC)
GCA_001685115.1	ASM168511v1	Ellobius lutescens	Euarchontoglires	Rodentia	Scaffold	2016-07-14	2019-08-06	13224	6461	413500	822944	2191766689	Erasmus medical center (ErasmusMC)
GCA_001685095.1	ETalpinus_0.1	Ellobius talpinus	Euarchontoglires	Rodentia	Scaffold	2016-07-14	2019-08-06	15246	8259	350460	644647	2265966243	Erasmus medical center (ErasmusMC)
GCA_006547115.1	GSC_porc_1.0	Erethizon dorsatum	Euarchontoglires	Rodentia	Scaffold	2019-07-09	2019-07-09	16680019	118744	15915	54415	2436547097	Canada's Genomic Enterprise
GCF_000743615.1	DMR_v1.0	Fukomys damarensis	Euarchontoglires	Rodentia	Scaffold	2014-09-04	2014-12-10	5314287	44830	74730	162545	2333892479	BGI
GCA_004027185.1	GliGli_v1_BIUU	Glis glis	Euarchontoglires	Rodentia	Scaffold	2019-01-16	2019-01-16	30338	26062	433430	444115	2462087207	Broad Institute
GCF_004785775.1	NIH_TR_1.0	Grammomys surdaster	Euarchontoglires	Rodentia	Scaffold	2019-04-12	2019-04-21	8094907	51731	23656	100279	2412664998	NIH Sequencing Center
GCA_004027655.1	GraMur_v1_BIUU	Graphiurus murinus	Euarchontoglires	Rodentia	Scaffold	2019-01-16	2019-01-16	28463	22138	1267939	1283630	2815014629	Broad Institute
GCF_000247695.1	HetGla_female_1.0	Heterocephalus glaber	Euarchontoglires	Rodentia	Scaffold	2012-03-09	2015-07-02	20532749	47778	4229	114653	2618204639	Broad Institute
GCF_000230445.1	HetGla_1.0	Heterocephalus glaber	Euarchontoglires	Rodentia	Scaffold	2011-10-16	2015-07-09	1603177	21750	39266	273990	2643961837	Beijing Genomics Institute
GCA_004027455.1	HydHyd_v1_BIUU	Hydrochoerus hydrochaeris	Euarchontoglires	Rodentia	Scaffold	2019-01-16	2019-01-16	202224	148451	655342	661089	2734590088	Broad Institute
GCA_004026905.1	HysCri_v1_BIUU	Hystrix cristata	Euarchontoglires	Rodentia	Scaffold	2019-01-16	2019-01-16	64768	57102	1136598	1140949	2470917678	Broad Institute
GCA_004006685.1	ASM400668v1	Ictidomys tridecemlineatus	Euarchontoglires	Rodentia	Scaffold	2019-01-09	2019-01-09	22643357	44127	10007	153524	2478641729	13-lined ground squirrel genome sequencing consortium
GCF_000236235.1	SpeTri2.0	Ictidomys tridecemlineatus	Euarchontoglires	Rodentia	Scaffold	2011-11-29	2015-08-12	8192786	44137	12483	153488	2478393770	Broad Institute
GCA_000181315.1	ASM18131v1	Ictidomys tridecemlineatus	Euarchontoglires	Rodentia	Contig	2010-11-19	2016-11-29	2749	2749	797481	797481	1913367893	The Genome Sequencing Platform, The Genome Assembly Team
GCF_000280705.1	JacJac1.0	Jaculus jaculus	Euarchontoglires	Rodentia	Scaffold	2012-08-07	2013-05-29	22080993	15675	10898	337362	2835250225	Broad Institute
GCA_003676075.2	GSC_YBM_2.0	Marmota flaviventris	Euarchontoglires	Rodentia	Scaffold	2019-05-29	2019-05-29	11407078	143681	33623	68594	2581339348	Canada's Genomic Enterprise
GCA_005280165.1	ASM528016v1	Marmota himalayana	Euarchontoglires	Rodentia	Scaffold	2019-05-10	2019-05-11	1497034	102162	4363	46328	2471704417	Xian Jiaotong University Health Science Center
GCF_001458135.1	marMar2.1	Marmota marmota	Euarchontoglires	Rodentia	Scaffold	2015-12-04	2016-02-11	31340621	66492	14543	77915	2510587379	MRC NATIONAL INSTITUTE FOR MEDICAL RESEARCH
GCF_002204375.1	MunDraft-v1.0	Meriones unguiculatus	Euarchontoglires	Rodentia	Scaffold	2017-06-21	2017-06-27	374687	46546	68793	143857	2523124066	Lucigen Corp.
GCA_004026785.1	MerUng_v1_BIUU	Meriones unguiculatus	Euarchontoglires	Rodentia	Scaffold	2019-01-16	2019-01-16	100883	69839	785187	796326	2637041433	Broad Institute
GCF_000349665.1	MesAur1.0	Mesocricetus auratus	Euarchontoglires	Rodentia	Scaffold	2013-03-29	2013-07-18	12753307	22511	21484	237700	2504925039	Broad Institute
GCA_001305995.1	ASM130599v1	Microtus agrestis	Euarchontoglires	Rodentia	Scaffold	2015-10-02	2015-10-02	896668	1380	230202	2813495	3124140565	University of Liverpool
GCA_007455615.1	ASM745561v1	Microtus arvalis	Euarchontoglires	Rodentia	Scaffold	2019-07-25	2019-07-26	52876	34797	1081432	1099517	2620579938	Groningen Institute for Evolutionary Life Sciences
GCF_000317375.1	MicOch1.0	Microtus ochrogaster	Euarchontoglires	Rodentia	Chromosome	2012-12-07	2013-08-21	17270019	21250	6335	187012	2287340943	Broad Institute
GCA_007455595.1	ASM745559v1	Microtus oeconomus	Euarchontoglires	Rodentia	Scaffold	2019-07-25	2019-07-26	114768	51221	562436	589027	2306554743	Groningen Institute for Evolutionary Life Sciences
GCF_900094665.1	CAROLI_EIJ_v1.1	Mus caroli	Euarchontoglires	Rodentia	Chromosome	2017-05-02	2017-05-21	122627250	30916	3163	136968	2553128900	EBI
GCA_001624675.1	NOD_ShiLtJ_v1	Mus musculus	Euarchontoglires	Rodentia	Chromosome	2016-04-26	2016-04-26	147352698	9439	5544	539650	2982063250	Wellcome Trust Sanger Institute
GCA_001624475.1	CBA_J_v1	Mus musculus	Euarchontoglires	Rodentia	Chromosome	2016-04-26	2016-04-26	144777665	13074	5466	370463	2921727955	Wellcome Trust Sanger Institute
GCA_001632555.1	C57BL_6NJ_v1	Mus musculus	Euarchontoglires	Rodentia	Chromosome	2016-05-09	2016-05-09	139118349	12707	3894	376733	2806800287	Wellcome Trust Sanger Institute
GCA_001632615.1	LP_J_v1	Mus musculus	Euarchontoglires	Rodentia	Chromosome	2016-05-09	2016-05-09	135164694	12608	3499	364701	2730798503	Wellcome Trust Sanger Institute
GCA_001624185.1	129S1_SvImJ_v1	Mus musculus	Euarchontoglires	Rodentia	Chromosome	2016-04-26	2016-04-26	134541008	14243	7154	327878	2732673693	Wellcome Trust Sanger Institute
GCA_001624445.1	CAST_EiJ_v1	Mus musculus	Euarchontoglires	Rodentia	Chromosome	2016-04-26	2016-04-26	133752109	11642	2977	391250	2653990650	Wellcome Trust Sanger Institute
GCA_001624835.1	WSB_EiJ_v1	Mus musculus	Euarchontoglires	Rodentia	Chromosome	2016-04-26	2016-04-26	133184209	11777	2239	372890	2689657557	Wellcome Trust Sanger Institute
GCA_001632575.1	C3H_HeJ_v1	Mus musculus	Euarchontoglires	Rodentia	Chromosome	2016-05-09	2016-05-09	133067396	14540	4069	333188	2701131316	Wellcome Trust Sanger Institute
GCA_001624295.1	AKR_J_v1	Mus musculus	Euarchontoglires	Rodentia	Chromosome	2016-04-26	2016-04-26	132982296	23042	5953	242285	2712707555	Wellcome Trust Sanger Institute
GCA_001624745.1	NZO_HlLtJ_v1	Mus musculus	Euarchontoglires	Rodentia	Chromosome	2016-04-26	2016-04-26	132960827	16509	7022	294115	2699267296	Wellcome Trust Sanger Institute
GCA_001632525.1	BALB_cJ_v1	Mus musculus	Euarchontoglires	Rodentia	Chromosome	2016-05-09	2016-05-09	129642644	16196	3825	305391	2627344254	Wellcome Trust Sanger Institute
GCA_001624215.1	A_J_v1	Mus musculus	Euarchontoglires	Rodentia	Chromosome	2016-04-26	2016-04-26	129072804	19043	4688	306830	2629995394	Wellcome Trust Sanger Institute
GCA_001624775.1	PWK_PhJ_v1	Mus musculus	Euarchontoglires	Rodentia	Chromosome	2016-04-26	2016-04-26	128387505	5105	3140	832630	2559987392	Wellcome Trust Sanger Institute
GCA_001624505.1	DBA_2J_v1	Mus musculus	Euarchontoglires	Rodentia	Chromosome	2016-04-26	2016-04-26	128213663	13123	4105	368025	2606162158	Wellcome Trust Sanger Institute
GCA_001624535.1	FVB_NJ_v1	Mus musculus	Euarchontoglires	Rodentia	Chromosome	2016-04-26	2016-04-26	127063089	15797	5013	302598	2588619290	Wellcome Trust Sanger Institute
GCF_000001635.26	GRCm38.p6	Mus musculus	Euarchontoglires	Rodentia	Chromosome	2017-09-15	2017-10-02	52589046	32273079	239	885	2818974548	Genome Reference Consortium
GCA_000002165.1	Mm_Celera	Mus musculus	Euarchontoglires	Rodentia	Chromosome	2011-05-09	2016-11-29	23250767	21690	668009	837963	3251246261	Celera Genomics
GCA_000185105.2	MmusALLPATHS2	Mus musculus	Euarchontoglires	Rodentia	Scaffold	2012-08-29	2012-08-29	18924318	19501	2314	191581	2505015129	Broad Institute
GCA_000350445.1	mm129svJae1.0	Mus musculus	Euarchontoglires	Rodentia	Scaffold	2013-04-05	2013-07-03	6876427	15255	9129	240489	2578286128	Broad Institute
GCA_003774525.2	ASM377452v2	Mus musculus	Euarchontoglires	Rodentia	Scaffold	2018-11-19	2018-11-19	1291016	391273	12661	36193	2801301292	Jackson Laboratory
GCA_000185125.1	MmusSOAP1	Mus musculus	Euarchontoglires	Rodentia	Scaffold	2011-01-07	2016-11-29	357132	15782	41268	391273	2561486811	Broad Institute
GCA_000181195.1	ASM18119v1	Mus musculus	Euarchontoglires	Rodentia	Contig	2010-11-19	2016-11-29	24821	24821	224713	224713	2477636994	Mouse Genome Sequencing Consortium
GCA_000389885.1	MSM_WGSv1	Mus musculus	Euarchontoglires	Rodentia	Scaffold	2013-05-08	2013-05-08	1170	1170	1237600	1237642	1195475039	Research Organization of Information and Systems
GCF_900095145.1	PAHARI_EIJ_v1.1	Mus pahari	Euarchontoglires	Rodentia	Chromosome	2017-05-02	2017-05-19	111406228	29465	2581	133720	2475012951	EBI
GCA_003336285.1	MUSP714	Mus spicilegus	Euarchontoglires	Rodentia	Scaffold	2018-07-23	2018-08-10	2198966	30918	37536	161217	2496083520	Oklahoma State Universtiy
GCA_001624865.1	SPRET_EiJ_v1	Mus spretus	Euarchontoglires	Rodentia	Chromosome	2016-04-26	2016-04-26	131945496	17887	5404	280393	2625587472	Wellcome Trust Sanger Institute
GCA_004027005.1	MusAve_v1_BIUU	Muscardinus avellanarius	Euarchontoglires	Rodentia	Scaffold	2019-01-16	2019-01-16	59013	44294	466805	481881	2527147110	Broad Institute
GCA_004027025.1	MyoCoy_v1_BIUU	Myocastor coypus	Euarchontoglires	Rodentia	Scaffold	2019-01-16	2019-01-16	35982	28446	1669667	1684916	2903175784	Broad Institute
GCA_004368595.1	ASM436859v1	Myodes glareolus	Euarchontoglires	Rodentia	Scaffold	2019-03-26	2019-03-26	1590265	164884	50926	72709	2396225068	Lund University
GCA_001305785.1	ASM130578v1	Myodes glareolus	Euarchontoglires	Rodentia	Scaffold	2015-10-02	2015-10-02	364535	1591	367242	2834384	3443072068	University of Liverpool
GCF_000622305.1	S.galili_v1.0	Nannospalax galili	Euarchontoglires	Rodentia	Scaffold	2014-06-05	2014-08-22	3618479	30353	154976	356097	3061424619	BGI
GCA_001675575.1	ASM167557v1	Neotoma lepida	Euarchontoglires	Rodentia	Scaffold	2016-06-23	2016-06-23	151693	9584	119373	398063	2353855022	University of Utah
GCA_002564305.1	Oct_mimax_AO248_v1	Octomys mimax	Euarchontoglires	Rodentia	Scaffold	2017-10-17	2019-08-06	4874	4478	1257804	1326410	2591288717	McMaster University
GCA_004026605.1	OndZib_v1_BIUU	Ondatra zibethicus	Euarchontoglires	Rodentia	Scaffold	2019-01-16	2019-01-16	89093	73746	565356	571599	2562752769	Broad Institute
GCA_004026725.1	OnyTor_v1_BIUU	Onychomys torridus	Euarchontoglires	Rodentia	Scaffold	2019-01-16	2019-01-16	20878	18287	2261735	2272285	3202219269	Broad Institute
GCA_007922755.1	PedCap_v1_BIUU	Pedetes capensis	Euarchontoglires	Rodentia	Scaffold	2019-08-08	2019-08-08	74432	54009	673563	687430	2850076812	Broad Institute
GCA_004363475.1	PerLonPac_v1_BIUU	Perognathus longimembris	Euarchontoglires	Rodentia	Scaffold	2019-03-22	2019-03-22	24714	17686	2409818	2428619	2601695796	Broad Institute
GCA_007827085.1	PCal_1.0	Peromyscus californicus	Euarchontoglires	Rodentia	Chromosome	2019-08-02	2019-08-02	97435531	32479	34400	155723	2401349449	University of Maryland
GCF_004664715.1	Pero_0.1	Peromyscus leucopus	Euarchontoglires	Rodentia	Scaffold	2019-04-05	2019-04-22	4476954	4102727	1763	1834	2474071336	University of California Irvine
GCA_003704035.1	HU_Pman_2.1	Peromyscus maniculatus	Euarchontoglires	Rodentia	Chromosome	2018-11-01	2018-11-01	115033041	30111	8523	155965	2512423440	Harvard University / Howard Hughes Medical Institute
GCF_000500345.1	Pman_1.0	Peromyscus maniculatus	Euarchontoglires	Rodentia	Scaffold	2013-12-05	2014-03-05	3760915	36367	30921	212962	2630541020	Baylor College of Medicine
GCA_003704135.2	HU_Ppol_1.3.3	Peromyscus polionotus	Euarchontoglires	Rodentia	Chromosome	2019-04-29	2019-04-29	117603569	13217	5292	318482	2645110392	Harvard University / Howard Hughes Medical Institute
GCA_004026965.1	PetTyp_v1_BIUU	Petromus typicus	Euarchontoglires	Rodentia	Scaffold	2019-01-16	2019-01-16	35766	29916	910679	920324	2389366989	Broad Institute
GCA_001707965.1	Psun0.5	Phodopus sungorus	Euarchontoglires	Rodentia	Contig	2016-08-18	2019-08-06	2392	2392	1462128	1462128	2003225912	University of Chicago
GCA_002215935.1	ASM221593v1	Psammomys obesus	Euarchontoglires	Rodentia	Contig	2017-07-07	2017-07-20	76398	76398	96427	96427	2311471749	Department of Zoology, University of Oxford, UK
GCF_000002265.2	Rn_Celera	Rattus norvegicus	Euarchontoglires	Rodentia	Chromosome	2011-05-09	2019-01-08	27430032	39779	7041	118432	2616422528	Celera Genomics
GCF_000001895.5	Rnor_6.0	Rattus norvegicus	Euarchontoglires	Rodentia	Chromosome	2014-07-02	2014-10-09	14986627	100461	955	75697	2870184193	Rat Genome Sequencing Consortium
GCA_004026225.1	RhiPru_v1_BIUU	Rhizomys pruinosus	Euarchontoglires	Rodentia	Scaffold	2019-01-16	2019-01-16	2627	2627	4150536	4151498	3937265448	Broad Institute
GCA_004025045.1	SigHis_v1_BIUU	Sigmodon hispidus	Euarchontoglires	Rodentia	Scaffold	2019-01-15	2019-01-15	101373	67983	883546	897290	2730600022	Broad Institute
GCA_002406435.1	ASM240643v1	Spermophilus dauricus	Euarchontoglires	Rodentia	Scaffold	2017-10-04	2017-10-04	1761345	34849	360804	502654	3106271744	BGI-shenzhen
GCA_004025085.1	ThrSwi_v1_BIUU	Thryonomys swinderianus	Euarchontoglires	Rodentia	Scaffold	2019-01-15	2019-01-15	21523	18955	1889641	1898466	2662148533	Broad Institute
GCA_002564285.1	Tym_barrerae_AO245_v1	Tympanoctomys barrerae	Euarchontoglires	Rodentia	Scaffold	2017-10-17	2019-08-06	4698	4179	1558800	1647196	2651634209	McMaster University
GCF_003426925.1	ASM342692v1	Urocitellus parryii	Euarchontoglires	Rodentia	Scaffold	2018-08-24	2018-09-11	3964291	91013	15884	79883	2520505282	UAF
GCA_004024805.1	XerIna_v1_BIUU	Xerus inauris	Euarchontoglires	Rodentia	Scaffold	2019-01-15	2019-01-15	83865	64054	577370	587115	2601418404	Broad Institute
GCA_004024765.1	ZapHud_v1_BIUU	Zapus hudsonius	Euarchontoglires	Rodentia	Scaffold	2019-01-15	2019-01-15	26350	23350	1158100	1165710	2611189839	Broad Institute
GCA_000181375.1	ASM18137v1	Tupaia belangeri	Euarchontoglires	Scandentia	Contig	2010-11-19	2016-11-29	2974	2974	841006	841006	2137225476	Broad Institute
GCF_000334495.1	TupChi_1.0	Tupaia chinensis	Euarchontoglires	Scandentia	Scaffold	2013-01-31	2013-12-03	3670124	25938	50750	242445	2846580235	BGI
GCA_004365275.1	TupTan_v1_BIUU	Tupaia tana	Euarchontoglires	Scandentia	Scaffold	2019-03-22	2019-03-25	2973	2971	3883620	3890086	3648908809	Broad Institute
GCA_006408695.1	IMP	Aepyceros melampus	Laurasiatheria	Artiodactyla	Scaffold	2019-06-24	2019-06-24	344542	82459	24102	81980	2631303056	Northwestern Polytechnical University
GCA_006408545.1	HBT	Alcelaphus buselaphus	Laurasiatheria	Artiodactyla	Scaffold	2019-06-24	2019-06-24	12034	889	539659	1241948	3882338275	Northwestern Polytechnical University
GCA_007570765.1	GSC_moose_1.0	Alces alces	Laurasiatheria	Artiodactyla	Scaffold	2019-07-29	2019-07-29	4131188	45090	48219	131786	2743737413	Canada's Genomic Enterprise
GCA_002201775.1	ALER1.0	Ammotragus lervia	Laurasiatheria	Artiodactyla	Scaffold	2017-06-20	2018-05-03	1301762	52017	77320	160040	2650836958	Northwest A&amp;F University
GCA_006408585.1	SGB	Antidorcas marsupialis	Laurasiatheria	Artiodactyla	Scaffold	2019-06-24	2019-06-24	694905	42749	94522	199605	3024612899	Northwestern Polytechnical University
GCA_004027515.2	AntAmePen_v2_BIUU_UCD	Antilocapra americana	Laurasiatheria	Artiodactyla	Scaffold	2019-07-15	2019-07-17	18845065	61698	1585152	1647241	2955306661	Broad Institute
GCA_007570785.1	GSC_phorn_1.0	Antilocapra americana	Laurasiatheria	Artiodactyla	Scaffold	2019-07-29	2019-07-29	18739554	220431	22443	48446	2509063228	Canada's Genomic Enterprise
GCA_003798545.1	ASM379854v1	Axis porcinus	Laurasiatheria	Artiodactyla	Scaffold	2018-11-20	2018-11-20	20764858	172761	136093	168266	2676163295	Novogene Bioinformatics Technology Corporation
GCA_004027495.1	BeaHun_v1_BIUU	Beatragus hunteri	Laurasiatheria	Artiodactyla	Scaffold	2019-01-16	2019-01-16	69303	57444	535889	545176	2697255800	Broad Institute
GCF_000754665.1	Bison_UMD1.0	Bison bison	Laurasiatheria	Artiodactyla	Scaffold	2014-10-09	2017-12-08	7192658	19971	128431	470415	2828031685	University of Maryland
GCA_007844835.1	NRC_Mithun_1	Bos frontalis	Laurasiatheria	Artiodactyla	Scaffold	2019-08-05	2019-08-05	1003348	28709	5015	179865	3002445034	NRC on Mithun ICAR
GCA_005887515.1	LU_Bosgru_v3.0	Bos grunniens	Laurasiatheria	Artiodactyla	Chromosome	2019-06-10	2019-06-10	114386978	44716738	414	1060	2832776395	Lanzhou University
GCF_000247795.1	Bos_indicus_1.0	Bos indicus	Laurasiatheria	Artiodactyla	Chromosome	2014-12-16	2017-01-12	106310653	28375	32	253770	2673965444	Genoa Biotecnologia SA
GCA_002933975.1	ASM293397v1	Bos indicus	Laurasiatheria	Artiodactyla	Chromosome	2018-02-27	2018-02-27	104295553	64498	216409	337292	2740330345	Anand Agricultural University
GCF_003369695.1	UOA_Brahman_1	Bos indicus x Bos taurus	Laurasiatheria	Artiodactyla	Chromosome	2018-11-30	2018-12-27	104466507	26764281	1250	1552	2680953056	University of Adelaide
GCA_003369685.2	UOA_Angus_1	Bos indicus x Bos taurus	Laurasiatheria	Artiodactyla	Chromosome	2018-11-30	2018-12-11	102763607	37061043	1435	1712	2580764822	University of Adelaide
GCA_007646595.1	ASM764659v1	Bos mutus	Laurasiatheria	Artiodactyla	Scaffold	2019-07-30	2019-07-30	16589160	90625	158691	209207	2761379179	Lanzhou University
GCF_000298355.1	BosGru_v2.0	Bos mutus	Laurasiatheria	Artiodactyla	Scaffold	2013-01-09	2013-11-01	1407960	22822	41192	233198	2645161911	BGI-shenzhen
GCF_002263795.1	ARS-UCD1.2	Bos taurus	Laurasiatheria	Artiodactyla	Chromosome	2018-04-11	2018-05-17	103308737	25896116	2211	2597	2715853792	USDA ARS
GCF_000003205.7	Btau_5.0.1	Bos taurus	Laurasiatheria	Artiodactyla	Chromosome	2015-11-19	2018-05-11	6806220	276285	3143	42267	2724980740	Cattle Genome Sequencing International Consortium
GCF_000003055.6	Bos_taurus_UMD_3.1.1	Bos taurus	Laurasiatheria	Artiodactyla	Chromosome	2014-12-03	2018-05-11	6380747	96955	3144	75618	2670139648	Center for Bioinformatics and Computational Biology, University of Maryland
GCF_003121395.1	UOA_WB_1	Bubalus bubalis	Laurasiatheria	Artiodactyla	Chromosome	2018-05-14	2018-08-30	117219835	22441509	509	919	2655780776	University of Adelaide
GCA_004794615.1	Bubbub1.0	Bubalus bubalis	Laurasiatheria	Artiodactyla	Scaffold	2019-04-16	2019-04-16	6957949	25038	33821	235948	2770260352	BGI-Shenzhen
GCA_002993835.1	ASM299383v1	Bubalus bubalis	Laurasiatheria	Artiodactyla	Scaffold	2018-03-12	2018-03-12	3579700	14568	99165	447289	3005952034	Egyptian Water Buffalo Genome Consortium (Agriculture Genetic Engineering Research Institute and Nile University)
GCF_000471725.1	UMD_CASPUR_WB_2.0	Bubalus bubalis	Laurasiatheria	Artiodactyla	Scaffold	2013-10-18	2018-07-07	1412388	21938	366983	630368	2836166969	University of Maryland
GCA_000180995.3	Bubalus_bubalis_Jaffrabadi_v3.0	Bubalus bubalis	Laurasiatheria	Artiodactyla	Scaffold	2018-05-14	2018-05-14	102345	13977	117845	432941	3759980894	Anand Agricultural University, Anand, Gujarat, India
GCF_000767855.1	Ca_bactrianus_MBC_1.0	Camelus bactrianus	Laurasiatheria	Artiodactyla	Scaffold	2014-10-23	2015-01-06	8812066	139019	35455	67435	1992663268	Inner Mongolia Agricultural University, P.R.China
GCA_000604445.1	CB1	Camelus bactrianus	Laurasiatheria	Artiodactyla	Scaffold	2014-03-28	2017-09-07	2814	1717	781462	1358656	1568773545	VETMEDUNI_POPGEN
GCA_000803125.2	CamDro2	Camelus dromedarius	Laurasiatheria	Artiodactyla	Chromosome	2019-05-20	2019-05-20	75021453	204356	23439	59913	2154386959	Vetmeduni Vienna
GCF_000767585.1	PRJNA234474_Ca_dromedarius_V1.0	Camelus dromedarius	Laurasiatheria	Artiodactyla	Scaffold	2014-10-21	2015-01-07	4188677	69131	32573	105348	2004063690	King Abdulaziz City for Science and Technology
GCA_001640815.1	ASM164081v1	Camelus dromedarius	Laurasiatheria	Artiodactyla	Contig	2016-05-09	2016-05-09	31503	31503	207871	207871	2084536768	University of Bristol
GCF_000311805.1	CB1	Camelus ferus	Laurasiatheria	Artiodactyla	Scaffold	2013-08-05	2013-11-29	2005940	90263	13334	68872	2009194609	The Bactrian Camels Genome Sequencing and Analysis Consortium
GCA_000978405.1	CapAeg_1.0	Capra aegagrus	Laurasiatheria	Artiodactyla	Chromosome	2015-04-24	2015-04-24	91317560	19347	89498	368693	2828873048	BGI
GCA_000765075.1	Caeg1	Capra aegagrus	Laurasiatheria	Artiodactyla	Scaffold	2014-10-09	2014-10-16	1750063	51868	6616	103827	2583320943	EBI
GCA_004361675.1	CVASU_BBG_1.0	Capra hircus	Laurasiatheria	Artiodactyla	Chromosome	2019-03-25	2019-03-25	102339471	819	3972	3696314	3041623660	Bangladesh Goat Genome Consortium (BGGC)
GCF_001704415.1	ARS1	Capra hircus	Laurasiatheria	Artiodactyla	Chromosome	2016-08-24	2017-02-03	87277232	26244591	29907	30399	2922813246	USDA ARS
GCA_000317765.2	CHIR_2.0	Capra hircus	Laurasiatheria	Artiodactyla	Chromosome	2015-09-16	2015-09-16	9094169	73533	102895	173141	2809418462	Beijing Genomics Institute
GCA_006410555.1	IBX	Capra ibex	Laurasiatheria	Artiodactyla	Scaffold	2019-06-24	2019-06-24	61905114	380983	55914	75375	2701356656	Northwestern Polytechnical University
GCA_003182615.2	ASM318261v2	Capra sibirica	Laurasiatheria	Artiodactyla	Scaffold	2018-10-30	2018-10-30	15190720	376582	85609	113068	2733031394	Northwest A&amp;F University
GCA_000751575.1	kmer631	Capreolus capreolus	Laurasiatheria	Artiodactyla	Scaffold	2014-09-09	2014-09-09	10458	4167	3088511	3781281	2785377831	UNIMELB
GCA_004024745.2	CatWag_v2_BIUU_UCD	Catagonus wagneri	Laurasiatheria	Artiodactyla	Scaffold	2019-07-15	2019-07-17	19204659	65965	1183730	1240743	2640067814	Broad Institute
GCA_006410635.1	HVD	Cephalophus harveyi	Laurasiatheria	Artiodactyla	Scaffold	2019-06-24	2019-06-24	365466	61368	85160	157791	2816643069	Northwestern Polytechnical University
GCA_002197005.1	CerEla1.0	Cervus elaphus	Laurasiatheria	Artiodactyla	Chromosome	2017-06-19	2018-03-07	107358006	7944	11479	406637	3438623608	National Agricultural Research and Innovation Centre
GCA_006408615.1	BWD	Connochaetes taurinus	Laurasiatheria	Artiodactyla	Scaffold	2019-06-24	2019-06-24	366224	70608	78350	131840	2644042816	Northwestern Polytechnical University
GCA_006408505.1	CTB	Damaliscus lunatus	Laurasiatheria	Artiodactyla	Scaffold	2019-06-24	2019-06-24	1166796	38843	92109	208023	3127764384	Northwestern Polytechnical University
GCA_002443075.1	Milu1.0	Elaphurus davidianus	Laurasiatheria	Artiodactyla	Scaffold	2017-10-04	2019-08-06	2844142	59950	194812	276603	2584693296	Nanjing Normal University
GCA_006408755.1	TMG	Eudorcas thomsonii	Laurasiatheria	Artiodactyla	Scaffold	2019-06-24	2019-06-24	1581717	137476	123308	190522	2904272043	Northwestern Polytechnical University
GCA_006408565.1	GFE	Giraffa camelopardalis	Laurasiatheria	Artiodactyla	Scaffold	2019-06-24	2019-06-24	3153258	25056	78945	253969	2473180627	Northwestern Polytechnical University
GCA_001651235.1	ASM165123v1	Giraffa tippelskirchi	Laurasiatheria	Artiodactyla	Scaffold	2016-05-25	2016-05-25	212164	47894	513177	595021	2705072464	Pennsylvania State University
GCA_006547405.1	ASM654740v1	Globicephala melas	Laurasiatheria	Artiodactyla	Scaffold	2019-07-03	2019-07-03	18102937	332801	6637	21236	2333871032	Canada's Genomic Enterprise
GCA_004026825.1	HemHyl_v1_BIUU	Hemitragus hylocrius	Laurasiatheria	Artiodactyla	Scaffold	2019-01-16	2019-01-16	85340	66552	469163	479550	2715042536	Broad Institute
GCA_004027065.2	HipAmp_v2_BIUU_UCD	Hippopotamus amphibius	Laurasiatheria	Artiodactyla	Scaffold	2019-07-15	2019-07-17	4444377	76609	910835	971145	2733493772	Broad Institute
GCA_002995585.1	ASM299558v1	Hippopotamus amphibius	Laurasiatheria	Artiodactyla	Scaffold	2018-03-13	2019-08-09	110752	34064	128772	208977	2425746322	Senckenberg Gesellschaft fuer Naturforschung
GCA_006942125.1	SCBI_HNig_1.0	Hippotragus niger	Laurasiatheria	Artiodactyla	Scaffold	2019-07-12	2019-07-12	4586323	45501	15557	135158	2595326149	Saint-Petersburg State University
GCA_006459105.1	NPU_HINE_1.0	Hydropotes inermis	Laurasiatheria	Artiodactyla	Scaffold	2019-06-25	2019-06-25	13818975	131446	22246	56894	2530176423	Northwestern Polytechnical University
GCA_006410655.1	DFW	Kobus ellipsiprymnus	Laurasiatheria	Artiodactyla	Scaffold	2019-06-24	2019-06-24	779552	26169	88848	279061	2895340485	Northwestern Polytechnical University
GCA_006410535.1	GRK	Litocranius walleri	Laurasiatheria	Artiodactyla	Scaffold	2019-06-24	2019-06-24	3126223	62351	79667	178573	2979336167	Northwestern Polytechnical University
GCA_006408675.1	KDD	Madoqua kirkii	Laurasiatheria	Artiodactyla	Scaffold	2019-06-24	2019-06-24	27730	27722	216116	221029	2648126871	Northwestern Polytechnical University
GCA_006459085.1	FMD	Moschus berezovskii	Laurasiatheria	Artiodactyla	Scaffold	2019-06-25	2019-06-25	2509225	57706	77520	154049	2818010997	Northwestern Polytechnical University
GCA_006461545.1	NPU_MBRE_1.0	Moschus berezovskii	Laurasiatheria	Artiodactyla	Scaffold	2019-06-25	2019-06-25	213462	24701	125813	275601	3835628252	Northwestern Polytechnical University
GCA_006461725.1	NPU_MCHR_1.0	Moschus chrysogaster	Laurasiatheria	Artiodactyla	Scaffold	2019-06-25	2019-06-25	100428	3769	127198	844280	4972482505	Northwestern Polytechnical University
GCA_004024705.2	MosMos_v2_BIUU_UCD	Moschus moschiferus	Laurasiatheria	Artiodactyla	Scaffold	2019-07-15	2019-07-17	11728851	34785	1072499	1195517	3069608437	Broad Institute
GCA_006408485.1	BMJ	Muntiacus crinifrons	Laurasiatheria	Artiodactyla	Scaffold	2019-06-24	2019-06-24	1305444	8265	21054	549998	2681196170	Northwestern Polytechnical University
GCA_006409035.1	CMJ	Muntiacus muntjak	Laurasiatheria	Artiodactyla	Scaffold	2019-06-24	2019-06-24	1258210	23470	383561	556267	2703710594	Northwestern Polytechnical University
GCA_006408525.1	CIJ	Muntiacus reevesi	Laurasiatheria	Artiodactyla	Scaffold	2019-06-24	2019-06-24	1221377	72382	200261	269408	2601888952	Northwestern Polytechnical University
GCA_006408635.1	GTG	Nanger granti	Laurasiatheria	Artiodactyla	Scaffold	2019-06-24	2019-06-24	528456	7454	62189	671117	3032779593	Northwestern Polytechnical University
GCA_006410615.1	SUN	Neotragus moschatus	Laurasiatheria	Artiodactyla	Scaffold	2019-06-24	2019-06-24	952090	59277	218204	366475	2675729750	Northwestern Polytechnical University
GCA_006410875.1	RAL	Neotragus pygmaeus	Laurasiatheria	Artiodactyla	Scaffold	2019-06-24	2019-06-24	363895	30751	354089	471398	2895867692	Northwestern Polytechnical University
GCA_004115125.1	UofA_Ohem_1.0	Odocoileus hemionus	Laurasiatheria	Artiodactyla	Scaffold	2019-01-30	2019-02-02	838758	113295	16208	58896	2343701333	University of Alberta
GCA_003697985.1	ASM369798v1	Odocoileus hemionus	Laurasiatheria	Artiodactyla	Scaffold	2018-10-31	2018-10-31	9678	9488	358334	387819	2324921134	Canada's Genomic Enterprise
GCF_002102435.1	Ovir.te_1.0	Odocoileus virginianus	Laurasiatheria	Artiodactyla	Scaffold	2017-04-20	2017-04-28	850721	122019	17026	48653	2380505687	Baylor College of Medicine
GCA_000191625.1	RRL-RSL_1.0	Odocoileus virginianus	Laurasiatheria	Artiodactyla	Contig	2011-03-07	2016-11-29	451	451	93873	93873	37656191	Texas A&amp;M University
GCA_001660835.1	ASM166083v1	Okapia johnstoni	Laurasiatheria	Artiodactyla	Scaffold	2016-06-10	2016-06-10	111538	39571	837179	925548	2878133036	Pennsylvania State University
GCA_006410675.1	KSP	Oreotragus oreotragus	Laurasiatheria	Artiodactyla	Scaffold	2019-06-24	2019-06-24	339390	42127	24892	141857	3247632364	Northwestern Polytechnical University
GCA_003945745.1	UCDavis_Ogaz_1	Oryx gazella	Laurasiatheria	Artiodactyla	Scaffold	2018-12-14	2018-12-14	1579191	19498	31177	266309	2762920344	University of California Davis
GCA_006410575.1	GMB	Oryx gazella	Laurasiatheria	Artiodactyla	Scaffold	2019-06-24	2019-06-24	1566830	19456	56922	292054	2768889188	Northwestern Polytechnical University
GCA_006417275.1	ORB	Ourebia ourebi	Laurasiatheria	Artiodactyla	Scaffold	2019-06-24	2019-06-24	1259	1259	3508661	3508672	2524866914	Northwestern Polytechnical University
GCA_003121645.1	O_ammon_KGZ_v1.0	Ovis ammon	Laurasiatheria	Artiodactyla	Scaffold	2018-05-11	2018-05-17	72289505	151569	41955	75155	2643433589	Northwest A&amp;F University
GCA_006410595.1	AGL	Ovis ammon	Laurasiatheria	Artiodactyla	Scaffold	2019-06-24	2019-06-24	5620092	46562	240203	317544	2659657073	Northwestern Polytechnical University
GCF_002742125.1	Oar_rambouillet_v1.0	Ovis aries	Laurasiatheria	Artiodactyla	Chromosome	2017-11-02	2019-02-06	107697089	2572683	2641	7486	2869914396	Baylor College of Medicine Human Genome Sequencing Center
GCF_000298735.2	Oar_v4.0	Ovis aries	Laurasiatheria	Artiodactyla	Chromosome	2015-11-22	2019-02-25	100009711	150472	5466	48482	2615516299	International Sheep Genome Consortium
GCA_000005525.1	Ovis_aries_1.0	Ovis aries	Laurasiatheria	Artiodactyla	Chromosome	2010-02-26	2016-11-29	34092587	685	1217	2352347	2860496367	International Sheep Genomics Consortium
GCF_000765115.1	Oori1	Ovis aries	Laurasiatheria	Artiodactyla	Scaffold	2014-10-09	2019-02-25	2217029	39721	6173	128014	2589834840	EBI
GCA_004026945.1	OviCan_v1_BIUU	Ovis canadensis	Laurasiatheria	Artiodactyla	Scaffold	2019-01-16	2019-01-16	69397	55973	1048136	1057548	2863658823	Broad Institute
GCA_006410695.1	MXD	Philantomba maxwellii	Laurasiatheria	Artiodactyla	Scaffold	2019-06-24	2019-06-24	383899	11377	25633	334216	3145938691	Northwestern Polytechnical University
GCA_006410515.1	PLG	Procapra przewalskii	Laurasiatheria	Artiodactyla	Scaffold	2019-06-24	2019-06-24	5522907	10405	274130	738871	2692986855	Northwestern Polytechnical University
GCA_006408465.1	WLD	Przewalskium albirostris	Laurasiatheria	Artiodactyla	Scaffold	2019-06-24	2019-06-24	3769372	39627	171874	294078	2692225130	Northwestern Polytechnical University
GCA_003182575.1	ASM318257v1	Pseudois nayaur	Laurasiatheria	Artiodactyla	Scaffold	2018-05-31	2018-05-31	21385	20979	214772	220288	2584167189	Northwest A&amp;F University
GCA_004026565.1	RanTarSib_v1_BIUU	Rangifer tarandus	Laurasiatheria	Artiodactyla	Scaffold	2019-01-16	2019-01-16	89062	77671	1360739	1365508	2897299934	Broad Institute
GCA_006410735.1	SNB	Raphicerus campestris	Laurasiatheria	Artiodactyla	Scaffold	2019-06-24	2019-06-24	537161	25050	57517	222189	3137860433	Northwestern Polytechnical University
GCA_006410935.1	BHR	Redunca redunca	Laurasiatheria	Artiodactyla	Scaffold	2019-06-24	2019-06-24	423407	39282	534502	701851	2724978760	Northwestern Polytechnical University
GCA_004024985.1	SaiTat_v1_BIUU	Saiga tatarica	Laurasiatheria	Artiodactyla	Scaffold	2019-01-15	2019-01-15	6453	6406	1772199	1775066	2876186568	Broad Institute
GCA_001292865.1	ss10.2_mar2013	Sus scrofa	Laurasiatheria	Artiodactyla	Scaffold	2015-09-16	2015-09-16	153651326	17259	5206	726487	2611360562	F. Hoffmann - La Roche AG
GCA_007644095.1	ASM764409v1	Sus scrofa	Laurasiatheria	Artiodactyla	Chromosome	2019-08-01	2019-08-01	140438739	1009524	6610	13644	2491053062	Novogene
GCA_006511355.1	NSME_pig_1	Sus scrofa	Laurasiatheria	Artiodactyla	Chromosome	2019-07-03	2019-07-03	138999934	52150866	613	1170	2502318605	University of Messina
GCA_002844635.1	USMARCv1.0	Sus scrofa	Laurasiatheria	Artiodactyla	Chromosome	2017-12-20	2017-12-20	131458098	6372407	14157	14818	2755438182	USDA ARS
GCF_000003025.6	Sscrofa11.1	Sus scrofa	Laurasiatheria	Artiodactyla	Chromosome	2017-02-14	2017-12-08	88231837	48231277	613	1118	2501912388	The Swine Genome Sequencing Consortium (SGSC)
GCA_000325925.2	minipig_v1.0	Sus scrofa	Laurasiatheria	Artiodactyla	Scaffold	2015-03-18	2015-03-18	5853977	31939	137577	272163	2508912457	BGI-shenzhen
GCA_001700135.1	Large_White_v1	Sus scrofa	Laurasiatheria	Artiodactyla	Scaffold	2016-08-05	2019-08-06	2441555	88831	102342	150742	2457907103	Novogene
GCA_001700155.1	Rongchang_pig_v1	Sus scrofa	Laurasiatheria	Artiodactyla	Scaffold	2016-08-05	2019-08-06	2325000	79093	120246	173508	2459027728	Novogene
GCA_001700255.1	Pietrain_pig_v1	Sus scrofa	Laurasiatheria	Artiodactyla	Scaffold	2016-08-05	2019-08-06	1663542	80611	88436	139497	2438316299	Novogene
GCA_001700575.1	Berkshire_pig_v1	Sus scrofa	Laurasiatheria	Artiodactyla	Scaffold	2016-08-05	2019-08-06	1655397	94651	94468	137661	2434706773	Novogene
GCA_001700165.1	Hampshire_pig_v1	Sus scrofa	Laurasiatheria	Artiodactyla	Scaffold	2016-08-05	2019-08-06	1550023	102417	82206	122452	2437109612	Novogene
GCA_001700235.1	Bamei_pig_v1	Sus scrofa	Laurasiatheria	Artiodactyla	Scaffold	2016-08-05	2019-08-06	1529027	70893	129335	187466	2460755741	Novogene
GCA_001700295.1	Jinhua_pig_v1	Sus scrofa	Laurasiatheria	Artiodactyla	Scaffold	2016-08-05	2019-08-06	1478908	95227	115554	158796	2453702738	Novogene
GCA_001700215.1	Landrace_pig_v1	Sus scrofa	Laurasiatheria	Artiodactyla	Scaffold	2016-08-05	2019-08-06	1407841	88142	94659	141909	2440981886	Novogene
GCA_001700195.1	Meishan_pig_v1	Sus scrofa	Laurasiatheria	Artiodactyla	Scaffold	2016-08-05	2019-08-06	1248180	63263	133833	201146	2467495771	Novogene
GCA_000472085.2	Tibetan_Pig_v2	Sus scrofa	Laurasiatheria	Artiodactyla	Scaffold	2016-08-08	2016-08-08	861885	57199	72068	148234	2437742524	Novogene
GCA_000331475.1	SscrofaMinipig	Sus scrofa	Laurasiatheria	Artiodactyla	Contig	2013-01-10	2013-01-10	22008	22008	231585	231585	2358017222	GlaxoSmithKline
GCA_006408735.1	CMD	Sylvicapra grimmia	Laurasiatheria	Artiodactyla	Scaffold	2019-06-24	2019-06-24	583330	9720	22324	468651	3145094493	Northwestern Polytechnical University
GCA_006408785.1	ABF	Syncerus caffer	Laurasiatheria	Artiodactyla	Scaffold	2019-06-24	2019-06-24	2316376	52316	148371	248905	2929427825	Northwestern Polytechnical University
GCA_006411685.1	MTN	Tragelaphus buxtoni	Laurasiatheria	Artiodactyla	Scaffold	2019-06-24	2019-06-24	7367	1286	2910462	4301196	3267488234	Northwestern Polytechnical University
GCA_006410755.1	BNG	Tragelaphus eurycerus	Laurasiatheria	Artiodactyla	Scaffold	2019-06-24	2019-06-24	12574	1974	1539703	2829973	2962040965	Northwestern Polytechnical University
GCA_006410775.1	LEK	Tragelaphus imberbis	Laurasiatheria	Artiodactyla	Scaffold	2019-06-24	2019-06-24	1775046	12858	272415	584429	4038235010	Northwestern Polytechnical University
GCA_006416875.1	CME	Tragelaphus oryx	Laurasiatheria	Artiodactyla	Scaffold	2019-06-24	2019-06-24	1262	1262	4043025	4043033	2837493372	Northwestern Polytechnical University
GCA_006410495.1	BUB	Tragelaphus scriptus	Laurasiatheria	Artiodactyla	Scaffold	2019-06-24	2019-06-24	890554	28350	237860	373810	2873326854	Northwestern Polytechnical University
GCA_006411015.1	STG	Tragelaphus spekii	Laurasiatheria	Artiodactyla	Scaffold	2019-06-24	2019-06-24	46427	9477	1769205	2115196	3725951127	Northwestern Polytechnical University
GCA_006410795.1	GTK	Tragelaphus strepsiceros	Laurasiatheria	Artiodactyla	Scaffold	2019-06-24	2019-06-24	511483	33649	320432	525298	2867754166	Northwestern Polytechnical University
GCA_004024965.2	ASM402496v2	Tragulus javanicus	Laurasiatheria	Artiodactyla	Scaffold	2019-07-15	2019-07-17	14082842	80230	1082489	1158497	2589955488	Broad Institute
GCA_006408655.1	LMD	Tragulus kanchil	Laurasiatheria	Artiodactyla	Scaffold	2019-06-24	2019-06-24	243497	13850	185856	500458	3053423192	Northwestern Polytechnical University
GCA_000164845.4	VicPac3.1	Vicugna pacos	Laurasiatheria	Artiodactyla	Scaffold	2019-07-16	2019-07-17	24022313	29536	77389	243669	2119600897	Deakin University
GCA_000767525.1	Vi_pacos_V1.0	Vicugna pacos	Laurasiatheria	Artiodactyla	Scaffold	2015-02-11	2015-02-11	5303709	213649	52275	75733	2013701362	BGI-Shenzhen
GCF_003709585.1	Aci_jub_2	Acinonyx jubatus	Laurasiatheria	Carnivora	Scaffold	2018-11-02	2018-11-13	48500042	179924	3220	27393	2384851327	Felidae consortium
GCF_001443585.1	aciJub1	Acinonyx jubatus	Laurasiatheria	Carnivora	Scaffold	2015-11-13	2018-11-30	3122036	35120	14383	170171	2372553907	Saint Petersburg State University
GCA_002007445.1	ASM200744v1	Ailuropoda melanoleuca	Laurasiatheria	Carnivora	Scaffold	2017-02-28	2017-02-28	9947519	128604	57414	106175	2428263693	Institute of Zoology, Chinese Academy of Sciences
GCF_000004335.2	AilMel_1.0	Ailuropoda melanoleuca	Laurasiatheria	Carnivora	Scaffold	2010-01-13	2015-02-04	1281781	39886	81467	200593	2299509015	Beijing Genomics Institute, Shenzhen
GCA_002007465.1	ASM200746v1	Ailurus fulgens	Laurasiatheria	Carnivora	Scaffold	2017-02-28	2017-02-28	2983736	99577	11589	69825	2342939051	Institute of Zoology, Chinese Academy of Sciences
GCA_900642305.1	arcGaz3	Arctocephalus gazella	Laurasiatheria	Carnivora	Scaffold	2019-02-13	2019-02-13	139181869	537425	5180	13973	2313585684	LMU
GCA_900500725.1	ArcGazv1.4	Arctocephalus gazella	Laurasiatheria	Carnivora	Scaffold	2018-08-25	2018-08-31	6207322	538754	6169	13956	2313485084	LMU
GCF_003265705.1	ASM326570v1	Callorhinus ursinus	Laurasiatheria	Carnivora	Scaffold	2018-06-27	2018-07-21	31506801	133024	14230	52955	2706868872	Canada's Genomics Enterprise
GCA_005444595.1	UMICH_Zoey_3.1	Canis lupus	Laurasiatheria	Carnivora	Chromosome	2019-05-30	2019-05-30	64204256	4722218	794	1793	2343218756	University of Michigan
GCA_007922845.1	UniMelb_Wolf_Refassem_1	Canis lupus	Laurasiatheria	Carnivora	Scaffold	2019-08-08	2019-08-08	64175042	842	765	3050747	2342421267	The University of Melbourne
GCA_004886185.1	Basenji_breed-1.1	Canis lupus	Laurasiatheria	Carnivora	Chromosome	2019-04-26	2019-04-26	61087166	3131423	2243	3630	2410429933	University of Missouri
GCF_000002285.3	CanFam3.1	Canis lupus	Laurasiatheria	Carnivora	Chromosome	2011-11-03	2018-07-12	45876610	267478	3268	27106	2410976875	Dog Genome Sequencing Consortium
GCF_003254725.1	ASM325472v1	Canis lupus	Laurasiatheria	Carnivora	Scaffold	2018-06-19	2018-07-05	34446301	5390770	2444	3121	2439831507	James Cook University
GCA_004027395.1	CanFam_VD_v1_BIUU	Canis lupus	Laurasiatheria	Carnivora	Scaffold	2019-01-16	2019-01-16	157754	100144	656742	667170	2544127025	Broad Institute
GCA_000331495.1	Beagle	Canis lupus	Laurasiatheria	Carnivora	Contig	2013-01-10	2013-01-10	21834	21834	221474	221474	2254627151	GlaxoSmithKline
GCA_000181415.1	ASM18141v1	Canis lupus	Laurasiatheria	Carnivora	Contig	2010-11-19	2016-11-29	1516	1516	1089636	1089636	1517481071	TIGR
GCA_004023885.1	CryFer_v1_BIUU	Cryptoprocta ferox	Laurasiatheria	Carnivora	Scaffold	2019-01-15	2019-01-15	173473	128639	464036	470371	2458846334	Broad Institute
GCF_002288905.1	ASM228890v2	Enhydra lutris	Laurasiatheria	Carnivora	Scaffold	2017-09-15	2017-09-20	38751465	244529	6771	29592	2455276666	BC Cancer Agency
GCA_006410715.1	ASM641071v1	Enhydra lutris	Laurasiatheria	Carnivora	Scaffold	2019-06-24	2019-06-24	9763901	23473	55496	212165	2425597608	UCLA
GCF_004028035.1	ASM402803v1	Eumetopias jubatus	Laurasiatheria	Carnivora	Scaffold	2019-01-16	2019-02-11	14018600	242372	7472	24747	2418263165	Canada's Genomic Enterprise
GCF_000181335.3	Felis_catus_9.0	Felis catus	Laurasiatheria	Carnivora	Chromosome	2017-11-20	2017-12-12	83967707	41915695	4508	4909	2521863845	Genome Sequencing Center (GSC) at Washington University (WashU) School of Medicine
GCA_000003115.1	catChrV17e	Felis catus	Laurasiatheria	Carnivora	Chromosome	2009-08-12	2016-11-29	16304361	4577	104053	604920	3160286939	NHGRI/Genome Technology Branch
GCA_004023925.1	FelNig_v1_BIUU	Felis nigripes	Laurasiatheria	Carnivora	Scaffold	2019-01-15	2019-01-15	18631	16007	590124	603600	2428424918	Broad Institute
GCA_900006375.2	Gulo_2.2_annotated	Gulo gulo	Laurasiatheria	Carnivora	Scaffold	2018-12-07	2018-12-07	178272	3657	47417	1066768	2423180524	Uppsala University
GCA_004023845.1	HelPar_v1_BIUU	Helogale parvula	Laurasiatheria	Carnivora	Scaffold	2019-01-15	2019-01-15	179119	113567	189370	200185	2392471390	Broad Institute
GCA_003009895.1	ASM300989v1	Hyaena hyaena	Laurasiatheria	Carnivora	Scaffold	2018-03-19	2018-06-05	2001327	311202	5760	18422	2374716107	Potsdam University
GCA_004023945.1	HyaHya_v1_BIUU	Hyaena hyaena	Laurasiatheria	Carnivora	Scaffold	2019-01-15	2019-01-15	66490	51677	350223	362072	2445474026	Broad Institute
GCF_000349705.1	LepWed1.0	Leptonychotes weddellii	Laurasiatheria	Carnivora	Scaffold	2013-03-29	2014-02-14	904031	23664	16711	169547	3156902762	Broad Institute
GCA_001883655.1	LycPicKen1.0	Lycaon pictus	Laurasiatheria	Carnivora	Chromosome	2016-12-01	2016-12-01	64190785	2695	813	1430320	2356716622	Smithsonian Institution
GCA_001887905.1	LycPicSAfr1.0	Lycaon pictus	Laurasiatheria	Carnivora	Chromosome	2016-12-02	2016-12-02	63240551	5555	803	797755	2358143818	Smithsonian Institution
GCA_004216515.1	sis1-161031-pseudohap	Lycaon pictus	Laurasiatheria	Carnivora	Scaffold	2019-02-20	2019-02-20	7494581	61225	1127	61776	2137698293	Stanford University
GCA_007474595.1	mLynCan4_v1.p	Lynx canadensis	Laurasiatheria	Carnivora	Chromosome	2019-07-26	2019-08-06	146106016	7503561	67	902	2408900816	Vertebrate Genomes Project
GCA_007474575.1	mLynCan4_v1.alt	Lynx canadensis	Laurasiatheria	Carnivora	Scaffold	2019-07-25	2019-07-26	130153	130121	15033	15036	1415234291	Vertebrate Genomes Project
GCA_900661375.1	LYPA1.0	Lynx pardinus	Laurasiatheria	Carnivora	Scaffold	2019-04-10	2019-04-10	1519745	99542	41700	91104	2413208909	CNAG
GCA_004024625.1	MelCap_v1_BIUU	Mellivora capensis	Laurasiatheria	Carnivora	Scaffold	2019-01-15	2019-01-15	59143	50213	2068312	2074823	3091173380	Broad Institute
GCA_004023865.1	MirAng_v1_BIUU	Mirounga angustirostris	Laurasiatheria	Carnivora	Scaffold	2019-01-15	2019-01-15	64640	52833	321256	330739	2407319723	Broad Institute
GCA_004023785.1	MunMun_v1_BIUU	Mungos mungo	Laurasiatheria	Carnivora	Scaffold	2019-01-15	2019-01-15	236501	180702	312364	316874	2448211634	Broad Institute
GCF_000239315.1	MusPutFurMale1.0	Mustela putorius	Laurasiatheria	Carnivora	Scaffold	2011-12-21	2015-07-09	9567452	66755	4245	76915	2400181698	Broad Institute
GCF_000215625.1	MusPutFur1.0	Mustela putorius	Laurasiatheria	Carnivora	Scaffold	2011-06-02	2013-12-10	9335154	44823	7783	117483	2410879678	Ferret Genome Sequencing Consortium
GCF_002201575.1	ASM220157v1	Neomonachus schauinslandi	Laurasiatheria	Carnivora	Scaffold	2017-06-20	2017-06-28	29518589	112698	7873	46708	2400934290	Johns Hopkins University
GCA_900108605.1	NNQGG.v01	Neovison vison	Laurasiatheria	Carnivora	Scaffold	2018-01-03	2018-01-03	6814223	32336	7175	143887	2447189291	Center for Quantitative Genetics and Genomics
GCF_000321225.1	Oros_1.0	Odobenus rosmarus	Laurasiatheria	Carnivora	Scaffold	2013-01-16	2016-07-27	2616778	89951	3893	70656	2400150193	Marine mammals
GCA_004023805.1	PanOnc_v1_BIUU	Panthera onca	Laurasiatheria	Carnivora	Scaffold	2019-01-15	2019-01-15	116574	62836	438792	460121	2504534411	Broad Institute
GCF_001857705.1	PanPar1.0	Panthera pardus	Laurasiatheria	Carnivora	Scaffold	2016-11-16	2016-12-06	21701857	20993	50377	265330	2578019207	Ulsan National Institute of Science and Technology
GCF_000464555.1	PanTig1.0	Panthera tigris	Laurasiatheria	Carnivora	Scaffold	2013-09-06	2014-03-07	8860407	30032	1479	157032	2391082183	Personal Genomics Institute
GCA_004024585.1	ParHer_v1_BIUU	Paradoxurus hermaphroditus	Laurasiatheria	Carnivora	Scaffold	2019-01-15	2019-01-15	71823	62870	438125	442658	2477229103	Broad Institute
GCA_004348235.1	GSC_HSeal_1.0	Phoca vitulina	Laurasiatheria	Carnivora	Scaffold	2019-03-13	2019-03-13	41024070	283887	5542	21603	2363587482	Canada's Genome Enterprise (CGEN)
GCA_005406085.1	Prionailurus_bengalensis_euptilurus_v01	Prionailurus bengalensis	Laurasiatheria	Carnivora	Scaffold	2019-05-15	2019-05-15	152598	21454	65356	318468	2435348619	Kyoto City Zoo
GCA_004024605.1	PteBra_v1_BIUU	Pteronura brasiliensis	Laurasiatheria	Carnivora	Scaffold	2019-01-15	2019-01-15	119023	90879	644728	652159	2602275310	Broad Institute
GCF_003327715.1	PumCon1.0	Puma concolor	Laurasiatheria	Carnivora	Scaffold	2018-07-19	2018-07-26	100532876	27187	2175	181166	2432966684	Broad Institute
GCA_004123975.1	Pco_k61	Puma concolor	Laurasiatheria	Carnivora	Scaffold	2019-01-31	2019-01-31	193865	6267	152272	634810	2591702724	Duke University
GCA_004023965.1	SpiGra_v1_BIUU	Spilogale gracilis	Laurasiatheria	Carnivora	Scaffold	2019-01-15	2019-01-15	85970	63054	422009	433831	2463318012	Broad Institute
GCF_006229205.1	meerkat_22Aug2017_6uvM2_HiC	Suricata suricatta	Laurasiatheria	Carnivora	Chromosome	2019-07-03	2019-07-15	141453419	75409	63791	129036	2353578744	DNA Zoo
GCA_004023905.1	SurSur_v1_BIUU	Suricata suricatta	Laurasiatheria	Carnivora	Scaffold	2019-01-15	2019-01-15	186735	148487	349868	354021	2471813441	Broad Institute
GCA_003697995.1	ASM369799v1	Taxidea taxus	Laurasiatheria	Carnivora	Scaffold	2018-10-31	2018-10-31	54556	37750	145161	173916	2416005247	Canada's Genomic Enterprise
GCA_003344425.1	ASM334442v1	Ursus americanus	Laurasiatheria	Carnivora	Scaffold	2018-07-27	2018-07-27	189900	27247	111495	231673	2588393916	Jackson Laboratory
GCF_003584765.1	ASM358476v1	Ursus arctos	Laurasiatheria	Carnivora	Scaffold	2018-09-21	2018-09-30	36708181	314844	6673	22245	2328659882	Canada's Genomic Enterprise
GCF_000687225.1	UrsMar_1.0	Ursus maritimus	Laurasiatheria	Carnivora	Scaffold	2014-05-12	2014-08-04	15940661	46506	23819	134162	2301379344	BGI-Shenzhen
GCA_004023825.1	VulLag_v1_BIUU	Vulpes lagopus	Laurasiatheria	Carnivora	Scaffold	2019-01-15	2019-01-15	102053	73976	1263345	1272949	2688561625	Broad Institute
GCF_003160815.1	VulVul2.2	Vulpes vulpes	Laurasiatheria	Carnivora	Scaffold	2018-05-25	2018-07-31	12472085	55450	82424	183898	2421568072	University of Illinois at Urbana-Champaign
GCF_900631625.1	zalCal2.2	Zalophus californianus	Laurasiatheria	Carnivora	Scaffold	2018-12-19	2018-12-27	143424588	97662	10423	57871	2372369564	LMU
GCA_004024565.1	ZalCal_v1_BIUU	Zalophus californianus	Laurasiatheria	Carnivora	Scaffold	2019-01-15	2019-01-15	132377	90567	571996	582272	2519860747	Broad Institute
GCF_000493695.1	BalAcu1.0	Balaenoptera acutorostrata	Laurasiatheria	Cetacea	Scaffold	2013-10-31	2016-03-09	12843668	22690	10776	184072	2431687698	Korea Ocean Research &amp; Development Institute
GCA_000978805.1	ASM97880v1	Balaenoptera bonaerensis	Laurasiatheria	Cetacea	Scaffold	2015-04-23	2015-04-23	20082	8410	421444	720900	2234641557	Division of Biological Science, Graduate School of Science, Kyoto University
GCF_002288925.1	ASM228892v2	Delphinapterus leucas	Laurasiatheria	Cetacea	Scaffold	2017-09-15	2017-09-23	19885328	159142	6972	35370	2358522448	BC Cancer Agency
GCA_002189225.1	ASM218922v1	Eschrichtius robustus	Laurasiatheria	Cetacea	Scaffold	2017-06-09	2017-06-09	187455	10066	57203	375256	2849453582	Purdue University
GCA_004363415.1	EscRob_v1_BIUU	Eschrichtius robustus	Laurasiatheria	Cetacea	Scaffold	2019-03-22	2019-03-22	94414	68559	1036148	1046770	2617572198	Broad Institute
GCA_002738545.1	EschrichtiusRobustus1.0	Eschrichtius robustus	Laurasiatheria	Cetacea	Scaffold	2017-10-31	2019-08-06	10674	2656	1213011	1595257	2922979301	Laboratory of postgenomic studies, Engelhardt Institute of Molecular Biology, Russian Academy of Sciences
GCA_004363455.1	EubJap_v1_BIUU	Eubalaena japonica	Laurasiatheria	Cetacea	Scaffold	2019-03-22	2019-03-22	39813	34866	1353963	1361057	2693575300	Broad Institute
GCA_004363515.1	IniGeo_v1_BIUU	Inia geoffrensis	Laurasiatheria	Cetacea	Scaffold	2019-03-22	2019-03-22	26707	24570	1213610	1218682	2596281358	Broad Institute
GCA_004363705.1	KogBre_v1_BIUU	Kogia breviceps	Laurasiatheria	Cetacea	Scaffold	2019-03-22	2019-03-22	28812	26201	1252072	1258125	2759698159	Broad Institute
GCF_003676395.1	ASM367639v1	Lagenorhynchus obliquidens	Laurasiatheria	Cetacea	Scaffold	2018-10-31	2018-11-16	28371583	255779	5422	21793	2334467171	Canada's Genomic Enterprise
GCF_000442215.1	Lipotes_vexillifer_v1	Lipotes vexillifer	Laurasiatheria	Cetacea	Scaffold	2013-08-09	2014-04-01	2419148	31902	30713	155510	2429212129	BGI
GCA_004329385.1	megNov1	Megaptera novaeangliae	Laurasiatheria	Cetacea	Scaffold	2019-03-06	2019-03-06	9138802	12321	2558	387694	2265788366	Arizona Cancer Evolution Center (ACE)
GCA_004027085.1	MesBid_v1_BIUU	Mesoplodon bidens	Laurasiatheria	Cetacea	Scaffold	2019-01-16	2019-01-16	33532	28959	1801720	1810317	2797694783	Broad Institute
GCF_005190385.1	NGI_Narwhal_1	Monodon monoceros	Laurasiatheria	Cetacea	Scaffold	2019-05-07	2019-05-21	107566389	255327	6972	25295	2355574979	The Narwhal Genome Initiative
GCA_005125345.1	ASM512534v1	Monodon monoceros	Laurasiatheria	Cetacea	Scaffold	2019-05-03	2019-05-04	1483363	10044	21006	813468	2350881526	University of Copenhagen
GCA_004027045.1	MonMon_v1_BIUU	Monodon monoceros	Laurasiatheria	Cetacea	Scaffold	2019-01-16	2019-01-16	88921	70965	882704	890705	2546711041	Broad Institute
GCA_004026685.1	MonMon_M_v1_BIUU	Monodon monoceros	Laurasiatheria	Cetacea	Scaffold	2019-01-16	2019-01-16	86766	67024	644873	653473	2472545502	Broad Institute
GCF_003031525.1	Neophocaena_asiaeorientalis_V1	Neophocaena asiaeorientalis	Laurasiatheria	Cetacea	Scaffold	2018-04-03	2018-04-20	6341296	86003	13699	66346	2284628084	Nanjing normal university
GCF_000331955.2	Oorc_1.1	Orcinus orca	Laurasiatheria	Cetacea	Scaffold	2014-04-04	2016-07-27	12735091	70300	1668	80100	2372919875	Marine mammals
GCA_003071005.1	ASM307100v1	Phocoena phocoena	Laurasiatheria	Cetacea	Scaffold	2018-04-24	2018-04-24	27499337	2773	142029	2347235	2441140962	University of Potsdam
GCA_004363495.1	PhoPho_v1_BIUU	Phocoena phocoena	Laurasiatheria	Cetacea	Scaffold	2019-03-22	2019-03-22	115969	89111	1331158	1338272	2701010810	Broad Institute
GCA_900411695.1	PhyCat2.0	Physeter catodon	Laurasiatheria	Cetacea	Scaffold	2018-07-07	2018-07-07	122182240	43829	14676	140250	2512140680	CNGB
GCF_002837175.2	ASM283717v2	Physeter catodon	Laurasiatheria	Cetacea	Chromosome	2019-03-08	2019-03-21	122182240	42542	14677	143605	2512149402	BGI
GCF_000472045.1	Physeter_macrocephalus-2.0.2	Physeter catodon	Laurasiatheria	Cetacea	Scaffold	2013-09-30	2018-02-28	427290	35257	11711	110444	2280727784	Aquatic Genome Models
GCA_004363435.1	PlaMin_v1_BIUU	Platanista minor	Laurasiatheria	Cetacea	Scaffold	2019-03-22	2019-03-22	23933	20879	1098790	1110492	2671072510	Broad Institute
GCA_004363935.1	PonBla_v1_BIUU	Pontoporia blainvillei	Laurasiatheria	Cetacea	Scaffold	2019-03-22	2019-03-22	2541	2541	1885058	1885701	1685099017	Broad Institute
GCA_007760645.1	ASM776064v1	Sousa chinensis	Laurasiatheria	Cetacea	Scaffold	2019-07-31	2019-07-31	19436979	113766	23368	62803	2338882461	BGI-SZ
GCA_003521335.2	S_chinensis_fine_genome_map	Sousa chinensis	Laurasiatheria	Cetacea	Scaffold	2019-02-01	2019-02-01	9008636	182701	20903	46900	2339085850	Shantou university
GCA_003227395.1	ASM322739v1	Tursiops aduncus	Laurasiatheria	Cetacea	Scaffold	2018-06-14	2018-06-14	1235788	206065	16249	44281	2503928010	Ewha Womans University
GCA_003314715.1	Tur_tru_Illumina_hap_v1	Tursiops truncatus	Laurasiatheria	Cetacea	Scaffold	2018-07-11	2018-07-11	27166507	30985	481	139544	2404363272	Johns Hopkins University
GCF_001922835.1	NIST Tur_tru v1	Tursiops truncatus	Laurasiatheria	Cetacea	Scaffold	2016-12-28	2017-01-12	26555543	44299	2648	116651	2132516271	National Institute of Standards and Technology
GCA_003435595.3	Tur_tru_Illumina_phased_v1	Tursiops truncatus	Laurasiatheria	Cetacea	Scaffold	2018-11-02	2018-11-02	781592	26636	97787	348040	4816480726	Johns Hopkins University
GCF_000151865.2	Ttru_1.4	Tursiops truncatus	Laurasiatheria	Cetacea	Scaffold	2015-06-08	2018-12-05	116287	11821	240558	554228	2551418184	Baylor College of Medicine
GCA_004364475.1	ZipCav_v1_BIUU	Ziphius cavirostris	Laurasiatheria	Cetacea	Scaffold	2019-03-22	2019-03-25	3608	3606	3758276	3761505	3150417206	Broad Institute
GCA_004027475.1	AnoCau_v1_BIUU	Anoura caudifer	Laurasiatheria	Chiroptera	Scaffold	2019-01-16	2019-01-16	185021	143417	337255	341895	2206589520	Broad Institute
GCA_007922775.1	AntPal_v1_BIUU	Antrozous pallidus	Laurasiatheria	Chiroptera	Scaffold	2019-08-08	2019-08-08	13958	13442	902551	905784	2597469403	Broad Institute
GCA_004027435.1	ArtJam_v1_BIUU	Artibeus jamaicensis	Laurasiatheria	Chiroptera	Scaffold	2019-01-16	2019-01-16	35347	32365	794376	798700	2424784351	Broad Institute
GCA_004027735.1	CarPer_v1_BIUU	Carollia perspicillata	Laurasiatheria	Chiroptera	Scaffold	2019-01-16	2019-01-16	10739	10341	1925339	1929203	2689411905	Broad Institute
GCA_004027555.1	CraTho_v1_BIUU	Craseonycteris thonglongyai	Laurasiatheria	Chiroptera	Scaffold	2019-01-16	2019-01-16	25762	23218	1224256	1230480	2272093077	Broad Institute
GCF_002940915.1	ASM294091v2	Desmodus rotundus	Laurasiatheria	Chiroptera	Scaffold	2018-03-28	2018-04-20	26869735	80250	29801	84109	2063808397	University of Copenhagen
GCA_000465285.1	ASM46528v1	Eidolon helvum	Laurasiatheria	Chiroptera	Scaffold	2013-09-20	2013-09-20	27684	12668	133538	288446	1837754460	School of Biological &amp; Chemical Sciences, Queen Mary University of London
GCA_003508835.1	Espe.v1	Eonycteris spelaea	Laurasiatheria	Chiroptera	Contig	2018-09-07	2018-09-07	8002591	8002591	4469	4469	1966861576	Duke-NUS Medical School
GCF_000308155.1	EptFus1.0	Eptesicus fuscus	Laurasiatheria	Chiroptera	Scaffold	2012-11-08	2014-05-30	13454942	21392	6789	167058	2026629342	Broad Institute
GCF_001890085.1	ASM189008v1	Hipposideros armiger	Laurasiatheria	Chiroptera	Scaffold	2016-12-06	2016-12-20	2328177	39863	7571	128956	2236581172	SKLEC &amp; IECR
GCA_004027415.1	HipGal_v1_BIUU	Hipposideros galeritus	Laurasiatheria	Chiroptera	Scaffold	2019-01-16	2019-01-16	37985	33704	840200	846566	2440750851	Broad Institute
GCA_004026805.1	LasBor_v1_BIUU	Lasiurus borealis	Laurasiatheria	Chiroptera	Scaffold	2019-01-16	2019-01-16	38543	35165	518900	525280	2857590849	Broad Institute
GCA_004027375.1	MacSob_v1_BIUU	Macroglossus sobrinus	Laurasiatheria	Chiroptera	Scaffold	2019-01-16	2019-01-16	453401	338389	171985	174041	1897644983	Broad Institute
GCA_007922815.1	MacCal_v1_BIUU	Macrotus californicus	Laurasiatheria	Chiroptera	Scaffold	2019-08-08	2019-08-08	16925	16386	1128787	1130929	2161582626	Broad Institute
GCA_004026885.1	MegLyr_v1_BIUU	Megaderma lyra	Laurasiatheria	Chiroptera	Scaffold	2019-01-16	2019-01-16	96489	71674	1902801	1909067	2620948449	Broad Institute
GCA_000465345.1	ASM46534v1	Megaderma lyra	Laurasiatheria	Chiroptera	Scaffold	2013-09-19	2013-09-19	16881	7043	192872	518327	1735931796	School of Biological &amp; Chemical Sciences, Queen Mary University of London
GCA_004026765.1	MicHir_v1_BIUU	Micronycteris hirsuta	Laurasiatheria	Chiroptera	Scaffold	2019-01-16	2019-01-16	68868	62961	550090	553308	2314654405	Broad Institute
GCF_001595765.1	Mnat.v1	Miniopterus natalensis	Laurasiatheria	Chiroptera	Scaffold	2016-03-22	2016-04-11	4315193	29777	1269	114632	1803099001	University of California, San Francisco
GCA_004026525.1	MinSch_v1_BIUU	Miniopterus schreibersii	Laurasiatheria	Chiroptera	Scaffold	2019-01-16	2019-01-16	108707	82539	177620	184538	1775846775	Broad Institute
GCA_004026545.1	MorMeg_v1_BIUU	Mormoops blainvillei	Laurasiatheria	Chiroptera	Scaffold	2019-01-16	2019-01-16	156292	142682	205259	207094	2111750309	Broad Institute
GCA_004026665.1	MurFea_v1_BIUU	Murina aurata	Laurasiatheria	Chiroptera	Scaffold	2019-01-16	2019-01-16	26051	23400	880177	886972	2331551382	Broad Institute
GCF_000412655.1	ASM41265v1	Myotis brandtii	Laurasiatheria	Chiroptera	Scaffold	2013-07-05	2013-10-30	3225832	23289	169750	325414	2107242811	BGI
GCF_000327345.1	ASM32734v1	Myotis davidii	Laurasiatheria	Chiroptera	Scaffold	2012-12-20	2014-02-12	3454484	15182	101769	325280	2059799708	BGI
GCF_000147115.1	Myoluc2.0	Myotis lucifugus	Laurasiatheria	Chiroptera	Scaffold	2010-09-14	2013-11-26	4293315	64330	11654	72785	2034575300	Broad Institute
GCA_004026985.1	MyoMyo_v1_BIUU	Myotis myotis	Laurasiatheria	Chiroptera	Scaffold	2019-01-16	2019-01-16	21824	19322	1045197	1053330	2294472406	Broad Institute
GCA_004026585.1	NocLep_v1_BIUU	Noctilio leporinus	Laurasiatheria	Chiroptera	Scaffold	2019-01-16	2019-01-16	191494	135651	298222	304393	2098501394	Broad Institute
GCA_007922795.1	NycHum_v1_BIUU	Nycticeius humeralis	Laurasiatheria	Chiroptera	Scaffold	2019-08-08	2019-08-08	15095	14267	1676240	1680573	2779565143	Broad Institute
GCF_004126475.1	mPhyDis1_v1.p	Phyllostomus discolor	Laurasiatheria	Chiroptera	Chromosome	2019-05-17	2019-05-17	110241909	6892556	141	964	2117764065	Vertebrate Genomes Project
GCA_004115245.1	mPhyDis1_v1.h	Phyllostomus discolor	Laurasiatheria	Chiroptera	Scaffold	2019-01-28	2019-01-29	933674	933674	10835	10873	2050602545	Vertebrate Genomes Project
GCA_004026625.1	PipPip_v1_BIUU	Pipistrellus pipistrellus	Laurasiatheria	Chiroptera	Scaffold	2019-01-16	2019-01-16	33992	26707	726104	736974	2090670443	Broad Institute
GCA_000465405.1	ASM46540v1	Pteronotus parnellii	Laurasiatheria	Chiroptera	Scaffold	2013-09-19	2013-09-19	22675	9502	177401	443121	1960317893	School of Biological &amp; Chemical Sciences, Queen Mary University of London
GCF_000325575.1	ASM32557v1	Pteropus alecto	Laurasiatheria	Chiroptera	Scaffold	2012-12-20	2016-02-10	15954802	31841	65598	170164	1985975446	BGI
GCF_000151845.1	Pvam_2.0	Pteropus vampyrus	Laurasiatheria	Chiroptera	Scaffold	2014-12-05	2015-02-23	5954017	21866	36094	225433	2198284804	Baylor College of Medicine
GCA_004115265.2	mRhiFer1_v1.p	Rhinolophus ferrumequinum	Laurasiatheria	Chiroptera	Chromosome	2019-05-17	2019-05-17	88025743	31900497	135	290	2075785400	Vertebrate Genomes Project
GCA_004115295.1	mRhiFer1_v1.h	Rhinolophus ferrumequinum	Laurasiatheria	Chiroptera	Scaffold	2019-01-28	2019-01-29	301176	301176	13424	13426	1514615512	Vertebrate Genomes Project
GCA_007922735.1	RhiFer_v1_BIUU	Rhinolophus ferrumequinum	Laurasiatheria	Chiroptera	Scaffold	2019-08-08	2019-08-08	156956	127195	345321	349275	2183991669	Broad Institute
GCA_000465495.1	ASM46549v1	Rhinolophus ferrumequinum	Laurasiatheria	Chiroptera	Scaffold	2013-09-19	2013-09-19	21151	11659	160500	290685	1926439238	School of Biological &amp; Chemical Sciences, Queen Mary University of London
GCF_001466805.2	Raegyp2.0	Rousettus aegyptiacus	Laurasiatheria	Chiroptera	Scaffold	2016-03-17	2016-03-29	2007187	1488988	2490	3049	1910250568	Boston University School of Medicine
GCA_004024865.1	RouAeg_v1_BIUU	Rousettus aegyptiacus	Laurasiatheria	Chiroptera	Scaffold	2019-01-15	2019-01-15	125332	100260	221754	226086	1972131931	Broad Institute
GCA_004025005.1	TadBra_v1_BIUU	Tadarida brasiliensis	Laurasiatheria	Chiroptera	Scaffold	2019-01-15	2019-01-15	24311	22617	1067615	1071858	2709928648	Broad Institute
GCA_004024845.1	TonSau_v1_BIUU	Tonatia saurophila	Laurasiatheria	Chiroptera	Scaffold	2019-01-15	2019-01-15	165561	141649	249810	252670	2105886965	Broad Institute
GCF_000260355.1	ConCri1.0	Condylura cristata	Laurasiatheria	Eulipotyphla	Scaffold	2012-05-01	2013-05-30	55520359	46163	2040	84597	1769662895	Broad Institute
GCA_004027635.1	CroInd_v1_BIUU	Crocidura indochinensis	Laurasiatheria	Eulipotyphla	Scaffold	2019-01-16	2019-01-16	4929	4927	2415412	2420679	3082217326	Broad Institute
GCF_000296755.1	EriEur2.0	Erinaceus europaeus	Laurasiatheria	Eulipotyphla	Scaffold	2012-09-20	2016-03-09	3264618	21359	5803	225567	2715720925	Broad Institute
GCA_000181395.1	ASM18139v1	Erinaceus europaeus	Laurasiatheria	Eulipotyphla	Contig	2010-11-19	2016-11-29	2753	2753	847680	847680	2133117389	Broad Institute
GCA_004024925.1	ScaAqu_v1_BIUU	Scalopus aquaticus	Laurasiatheria	Eulipotyphla	Scaffold	2019-01-15	2019-01-15	94879	72421	640296	647535	2068871057	Broad Institute
GCA_004363575.1	SolPar_v1_BIUU	Solenodon paradoxus	Laurasiatheria	Eulipotyphla	Scaffold	2019-03-22	2019-03-22	407682	236847	176618	181804	2109877870	Broad Institute
GCA_002901085.1	ASM290108v1	Solenodon paradoxus	Laurasiatheria	Eulipotyphla	Scaffold	2018-01-26	2018-01-26	110915	89121	40482	48846	2049415269	University of Puerto Rico - Mayaguez Campus
GCF_000181275.1	SorAra2.0	Sorex araneus	Laurasiatheria	Eulipotyphla	Scaffold	2012-08-27	2016-03-10	22794405	22623	12845	201798	2423158183	Broad Institute
GCA_004024945.1	UroGra_v1_BIUU	Uropsilus gracilis	Laurasiatheria	Eulipotyphla	Scaffold	2019-01-15	2019-01-15	55035	43618	723835	732083	2112710047	Broad Institute
GCF_000283155.1	CerSimSim1.0	Ceratotherium simum	Laurasiatheria	Perissodactyla	Scaffold	2012-08-07	2013-12-02	26277727	92960	3087	57824	2464367180	Broad Institute
GCA_004027795.1	CerCot_v1_BIUU	Ceratotherium simum	Laurasiatheria	Perissodactyla	Scaffold	2019-01-16	2019-01-16	23005	21199	942426	949480	2666617437	Broad Institute
GCA_002844835.1	ASM284483v1	Dicerorhinus sumatrensis	Laurasiatheria	Perissodactyla	Scaffold	2017-12-19	2019-08-06	614498	89455	1061589	1110756	2949863658	Marshall University Genomic Core Facility
GCA_004027315.2	DicBicMic_v2_BIUU_UCD	Diceros bicornis	Laurasiatheria	Perissodactyla	Scaffold	2019-07-15	2019-07-17	14664201	91002	1981226	2027983	3060207893	Broad Institute
GCA_003033725.1	ASM303372v1	Equus asinus	Laurasiatheria	Perissodactyla	Scaffold	2018-04-04	2018-05-17	15144613	134070	9021	49709	2321045832	Centre for GeoGenetics
GCF_001305755.1	ASM130575v1	Equus asinus	Laurasiatheria	Perissodactyla	Scaffold	2015-10-02	2015-12-02	3776412	66737	2167	71760	2391051217	Inner Mongolian Agricultural University
GCF_002863925.1	EquCab3.0	Equus caballus	Laurasiatheria	Perissodactyla	Chromosome	2018-01-05	2018-02-14	87230776	1502753	4701	10987	2506966135	University of Louisville
GCF_000002305.2	EquCab2.0	Equus caballus	Laurasiatheria	Perissodactyla	Chromosome	2011-06-03	2018-01-30	46749900	112381	9637	55317	2474929062	The Genome Assembly Team
GCA_000696655.1	Ajinai1.0	Equus caballus	Laurasiatheria	Perissodactyla	Scaffold	2014-06-06	2014-06-06	56256	40738	119776	155158	2377506909	College of Animal Science, Inner Mongolian Agricultural University, China
GCF_000696695.1	Burgud	Equus przewalskii	Laurasiatheria	Perissodactyla	Scaffold	2014-06-06	2014-07-14	513800	57610	53097	134060	2395954271	College of Animal Science, Inner Mongolian Agricultural University, China
GCA_004024905.1	TapInd_v1_BIUU	Tapirus indicus	Laurasiatheria	Perissodactyla	Scaffold	2019-01-15	2019-01-15	308930	225792	280135	284468	2425203111	Broad Institute
GCA_004025025.1	TapTer_v1_BIUU	Tapirus terrestris	Laurasiatheria	Perissodactyla	Scaffold	2019-01-15	2019-01-15	186384	164193	803506	805779	2571458752	Broad Institute
GCF_001685135.1	ManJav1.0	Manis javanica	Laurasiatheria	Pholidota	Scaffold	2016-07-14	2016-08-08	204728	38922	80670	398998	2547395906	The International Pangolin Research Consortium
GCA_000738955.1	M_pentadactyla-1.1.1	Manis pentadactyla	Laurasiatheria	Pholidota	Scaffold	2014-08-12	2017-12-27	117920	28718	92772	230930	2204732179	Washington University (WashU)
GCA_004765945.1	ManTri_v1_BIUU	Manis tricuspis	Laurasiatheria	Pholidota	Scaffold	2019-04-09	2019-04-09	25241	23755	2116242	2120018	3013399831	Broad Institute
GCF_000189315.1	Devil_ref v7.0	Sarcophilus harrisii	Marsupialia	Dasyuromorphia	Scaffold	2012-01-20	2013-11-26	1847106	20139	35974	237291	3174693010	Wellcome Trust Sanger Institute
GCA_000219685.1	Devil_CABOG_asm.06	Sarcophilus harrisii	Marsupialia	Dasyuromorphia	Scaffold	2011-07-01	2016-11-30	151762	11025	148774	457735	3232424150	J. Craig Venter Institute
GCA_007646695.1	UniMelb_Thylacine_Refassem_1	Thylacinus cynocephalus	Marsupialia	Dasyuromorphia	Scaffold	2019-07-30	2019-07-31	1923833	461	19549	5628809	3095956865	The University of Melbourne
GCA_000002295.1	ASM229v1	Monodelphis domestica	Marsupialia	Didelphimorphia	Chromosome	2011-05-04	2016-11-29	527952102	107990	5137	72811	3600487649	The Genome Sequencing Platform, The Genome Assembly Team
GCF_000002295.2	MonDom5	Monodelphis domestica	Marsupialia	Didelphimorphia	Chromosome	2001-01-01	2014-06-13	59809810	108014	5016	72674	3598443077	The Genome Sequencing Platform, The Genome Assembly Team
GCA_000004035.1	Meug_1.1	Notamacropus eugenii	Marsupialia	Diprotodontia	Scaffold	2010-01-06	2016-11-29	36602	2602	277711	1174382	3075184024	Tammar Wallaby Genome Sequencing Consortium
GCF_002099425.1	phaCin_unsw_v4.1	Phascolarctos cinereus	Marsupialia	Diprotodontia	Contig	2017-04-18	2017-05-10	11587828	11587828	1907	1907	3192581492	The Earlham Institute
GCA_900166895.1	phaCin_tgac_v2.0	Phascolarctos cinereus	Marsupialia	Diprotodontia	Scaffold	2018-05-11	2018-05-11	798273	126882	796464	819636	3603908365	KOALA GENOME CONSORTIUM
GCF_900497805.2	bare-nosed wombat genome assembly	Vombatus ursinus	Marsupialia	Diprotodontia	Scaffold	2018-12-19	2019-01-24	28503419	113054	15416	81204	3486597218	MRC Institute of Genetics and Molecular Medicine, University of Edinburgh
GCF_004115215.1	mOrnAna1.p.v1	Ornithorhynchus anatinus	Monotremata	Monotremata	Chromosome	2019-05-17	2019-05-17	83338043	15146802	305	824	1858552590	Vertebrate Genomes Project
GCA_002966995.1	ASM296699v1	Ornithorhynchus anatinus	Monotremata	Monotremata	Scaffold	2018-03-02	2018-03-02	18718360	7578676	4568	5044	1990409179	BGI
GCA_000002275.2	ASM227v2	Ornithorhynchus anatinus	Monotremata	Monotremata	Chromosome	2012-12-26	2017-12-01	991605	11544	201524	445367	1996809494	Washington University (WashU)
GCA_004115175.1	mOrnAna1.h.v1	Ornithorhynchus anatinus	Monotremata	Monotremata	Scaffold	2019-01-28	2019-01-29	882175	882175	5850	5878	1575984168	Vertebrate Genomes Project
GCA_004027955.1	ChaVel_v1_BIUU	Chaetophractus vellerosus	Xenarthra	Cingulata	Scaffold	2019-01-16	2019-01-16	1606	1606	7677333	7680080	5335596729	Broad Institute
GCF_000208655.1	Dasnov3.0	Dasypus novemcinctus	Xenarthra	Cingulata	Scaffold	2012-01-06	2013-12-03	1687935	26277	46559	314972	3631522711	Baylor College of Medicine
GCA_004025125.1	TolMat_v1_BIUU	Tolypeutes matacus	Xenarthra	Cingulata	Scaffold	2019-01-15	2019-01-15	10217	9441	2925507	2941308	4115028163	Broad Institute
GCA_004027775.1	BraVar_v1_BIUU	Bradypus variegatus	Xenarthra	Pilosa	Scaffold	2019-01-16	2019-01-16	1900	1900	1771805	1772267	1502475299	Broad Institute
GCA_004027855.1	ChoDid_v1_BIUU	Choloepus didactylus	Xenarthra	Pilosa	Scaffold	2019-01-16	2019-01-16	7289	7167	2532333	2537432	3390661301	Broad Institute
GCA_000164785.2	C_hoffmanni-2.0.1	Choloepus hoffmanni	Xenarthra	Pilosa	Scaffold	2014-10-02	2015-01-14	366442	64490	269084	370041	3286013499	The Genome Institute, Washington University School of Medicine
GCA_004026745.1	MyrTri_v1_BIUU	Myrmecophaga tridactyla	Xenarthra	Pilosa	Scaffold	2019-01-16	2019-01-16	41255	36434	1621408	1629691	3547273050	Broad Institute
GCA_004025105.1	TamTet_v1_BIUU	Tamandua tetradactyla	Xenarthra	Pilosa	Scaffold	2019-01-15	2019-01-15	19789	18654	2144204	2150023	3849374830	Broad Institute
