# Supplementary material for: High-quality carnivoran genomes from roadkill samples enable comparative species delineation in aardwolf and bat-eared fox
Source: eLife. 2021 Feb 18;10:e63167. doi: 10.7554/eLife.63167 (PMC7963486; doi:10.7554/eLife.63167)
Supplement: Supplementary file 4. [file elife-63167-supp4.xlsx]

## Sheet: BUSCO_Carni_updated (noHIC)
NCBI Accession	Assembly_Name	Species	Order	Family	Assembly	Complete_All	Complete_Single	Complete_Duplicated	Fragmented	Missing
GCA_000181415.1	ASM18141v1	Canis lupus	Carnivora	Canidae	Canis lupus [ASM18141v1]	3.4	3.4	0	20.1	76.5
GCA_004023925.1	FelNig_v1_BIUU	Felis nigripes	Carnivora	Felidae	Felis nigripes [FelNig_v1_BIUU]	41.4	41.2	0.2	37.2	21.4
GCA_000331495.1	Beagle	Canis lupus	Carnivora	Canidae	Canis lupus [Beagle]	41.8	41.2	0.6	38.1	20.1
NMB12641_SOAPdenovo	NMB12641_SOAPdenovo	Proteles cristatus	Carnivora	Hyaenidae	Proteles cristatus [NMB12641_SOAPdenovo]	44.9	44.6	0.3	31.7	23.4
NMB12639_SOAPdenovo	NMB12639_SOAPdenovo	Otocyon megalotis	Carnivora	Canidae	Otocyon megalotis [NMB12639_SOAPdenovo]	49.2	48.9	0.3	30.8	20
GCA_003697995.1	ASM369799v1	Taxidea taxus	Carnivora	Mustelidae	Taxidea taxus [ASM369799v1]	62	61	1	25.6	12.4
GCA_000003115.1	catChrV17e	Felis catus	Carnivora	Felidae	Felis catus [catChrV17e]	68.7	68.3	0.4	13.8	17.5
GCA_004023945.1	HyaHya_v1_BIUU	Hyaena hyaena	Carnivora	Hyaenidae	Hyaena hyaena [HyaHya_v1_BIUU]	74.7	73.7	1	16.2	9.1
GCA_004023865.1	MirAng_v1_BIUU	Mirounga angustirostris	Carnivora	Phocidae	Mirounga angustirostris [MirAng_v1_BIUU]	75.4	74.7	0.7	16.5	8.1
GCA_004024585.1	ParHer_v1_BIUU	Paradoxurus hermaphroditus	Carnivora	Viverridae	Paradoxurus hermaphroditus [ParHer_v1_BIUU]	78.3	77.7	0.6	15.6	6.1
GCA_004023965.1	SpiGra_v1_BIUU	Spilogale gracilis	Carnivora	Mephitidae	Spilogale gracilis [SpiGra_v1_BIUU]	79.4	78.8	0.6	13.9	6.7
GCA_004024625.1	MelCap_v1_BIUU	Mellivora capensis	Carnivora	Mustelidae	Mellivora capensis [MelCap_v1_BIUU]	81.9	81.3	0.6	12.8	5.3
GCA_004023805.1	PanOnc_v1_BIUU	Panthera onca	Carnivora	Felidae	Panthera onca [PanOnc_v1_BIUU]	82.1	81.6	0.5	12.3	5.6
GCF_000349705.1	LepWed1.0	Leptonychotes weddellii	Carnivora	Phocidae	Leptonychotes weddellii [LepWed1.0]	82.4	81.4	1	11.9	5.7
GCA_005406085.1	Prionailurus_bengalensis_euptilurus_v01	Prionailurus bengalensis	Carnivora	Felidae	Prionailurus bengalensis [Prionailurus_bengalensis_euptilurus_v01]	84.2	83.7	0.5	11	4.8
GCA_004023825.1	VulLag_v1_BIUU	Vulpes lagopus	Carnivora	Canidae	Vulpes lagopus [VulLag_v1_BIUU]	85	83.7	1.3	11.1	3.9
GCA_004024605.1	PteBra_v1_BIUU	Pteronura brasiliensis	Carnivora	Mustelidae	Pteronura brasiliensis [PteBra_v1_BIUU]	85.2	84.6	0.6	10.3	4.5
GCA_004123975.1	Pco_k61	Puma concolor	Carnivora	Felidae	Puma concolor [Pco_k61]	86.2	85.6	0.6	8.8	5
GCA_003344425.1	ASM334442v1	Ursus americanus	Carnivora	Ursidae	Ursus americanus [ASM334442v1]	86.3	85.7	0.6	9	4.7
GCA_004023845.1	HelPar_v1_BIUU	Helogale parvula	Carnivora	Herpestidae	Helogale parvula [HelPar_v1_BIUU]	87	86.3	0.7	9	4
GCA_004216515.1	sis1-161031-pseudohap	Lycaon pictus	Carnivora	Canidae	Lycaon pictus [sis1-161031-pseudohap]	88	87.1	0.9	2.6	9.4
GCA_004024565.1	ZalCal_v1_BIUU	Zalophus californianus	Carnivora	Otariidae	Zalophus californianus [ZalCal_v1_BIUU]	88.1	86.4	1.7	7.7	4.2
GCA_004027395.1	CanFam_VD_v1_BIUU	Canis lupus	Carnivora	Canidae	Canis lupus [CanFam_VD_v1_BIUU]	88.4	87.4	1	7.9	3.7
GCA_900500725.1	ArcGazv1.4	Arctocephalus gazella	Carnivora	Otariidae	Arctocephalus gazella [ArcGazv1.4]	88.4	87.6	0.8	6.8	4.8
GCA_900642305.1	arcGaz3	Arctocephalus gazella	Carnivora	Otariidae	Arctocephalus gazella [arcGaz3]	88.6	87.9	0.7	6.7	4.7
GCA_900006375.2	Gulo_2.2_annotated	Gulo gulo	Carnivora	Mustelidae	Gulo gulo [Gulo_2.2]	88.7	88.3	0.4	7.7	3.6
GCA_004023905.1	SurSur_v1_BIUU	Suricata suricatta	Carnivora	Herpestidae	Suricata suricatta [SurSur_v1_BIUU]	88.9	87.8	1.1	7.4	3.7
GCA_004023885.1	CryFer_v1_BIUU	Cryptoprocta ferox	Carnivora	Eupleridae	Cryptoprocta ferox [CryFer_v1_BIUU]	89	88	1	7.7	3.3
GCA_004023785.1	MunMun_v1_BIUU	Mungos mungo	Carnivora	Herpestidae	Mungos mungo [MunMun_v1_BIUU]	90.1	89.3	0.8	6.7	3.2
GCA_007922845.1	UniMelb_Wolf_Refassem_1	Canis lupus	Carnivora	Canidae	Canis lupus [UniMelb_Wolf_Refassem_1]	90.4	89.4	1	5.5	4.1
NMB12641_MaSuRCA	NMB12641_MaSuRCA	Proteles cristatus	Carnivora	Hyaenidae	Proteles cristatus [NMB12641_MaSuRCA]	92.8	92.3	0.5	3.8	3.4
NMB12639_MaSuRCA	NMB12639_MaSuRCA	Otocyon megalotis	Carnivora	Canidae	Otocyon megalotis [NMB12639_MaSuRCA]	92.9	91.7	1.2	4.2	2.9
GCA_006410715.1	ASM641071v1	Enhydra lutris	Carnivora	Mustelidae	Enhydra lutris [ASM641071v1]	93.2	92.3	0.9	3.7	3.1
GCF_003327715.1	PumCon1.0	Puma concolor	Carnivora	Felidae	Puma concolor [PumCon1]	93.4	93	0.4	3.4	3.2
GCF_001443585.1	aciJub1	Acinonyx jubatus	Carnivora	Felidae	Acinonyx jubatus [aciJub1]	93.7	93.4	0.3	3.6	2.7
GCA_001883655.1	LycPicKen1.0	Lycaon pictus	Carnivora	Canidae	Lycaon pictus [LycPicKen1.0]	93.8	93.2	0.6	3.3	2.9
GCA_002007445.1	ASM200744v1	Ailuropoda melanoleuca	Carnivora	Ursidae	Ailuropoda melanoleuca [ASM200744v1]	94.4	93.1	1.3	2.6	3
GCA_900661375.1	LYPA1.0	Lynx pardinus	Carnivora	Felidae	Lynx pardinus [LYPA1.0]	94.4	93.9	0.5	3.1	2.5
GCF_000464555.1	PanTig1.0	Panthera tigris	Carnivora	Felidae	Panthera tigris [PanTig1.0]	94.4	94	0.4	3.2	2.4
GCF_002201575.1	ASM220157v1	Neomonachus schauinslandi	Carnivora	Phocidae	Neomonachus schauinslandi [ASM220157v1]	94.6	93.5	1.1	2.9	2.5
GCF_003265705.1	ASM326570v1	Callorhinus ursinus	Carnivora	Otariidae	Callorhinus ursinus [ASM326570v1]	94.7	82.7	12	2.3	3
GCF_000687225.1	UrsMar_1.0	Ursus maritimus	Carnivora	Ursidae	Ursus maritimus [UrsMar_1]	94.7	94.3	0.4	3	2.3
GCA_001887905.1	LycPicSAfr1.0	Lycaon pictus	Carnivora	Canidae	Lycaon pictus [LycPicSAfr1.0]	94.8	94.2	0.6	2.5	2.7
GCF_000321225.1	Oros_1.0	Odobenus rosmarus	Carnivora	Odobenidae	Odobenus rosmarus [Oros_1.0]	95.1	93.6	1.5	2.6	2.3
GCF_004028035.1	ASM402803v1	Eumetopias jubatus	Carnivora	Otariidae	Eumetopias jubatus [ASM402803v1]	95.2	92.9	2.3	2.4	2.4
GCF_003160815.1	VulVul2.2	Vulpes vulpes	Carnivora	Canidae	Vulpes vulpes [VulVul2]	95.2	93.8	0.6	2.8	2
GCA_005444595.1	UMICH_Zoey_3.1	Canis lupus	Carnivora	Canidae	Canis lupus [UMICH_Zoey_3.1]	95.2	93.9	1.3	2.6	2.2
GCA_002007465.1	ASM200746v1	Ailurus fulgens	Carnivora	Ailuridae	Ailurus fulgens [ASM200746v1]	95.2	94.3	0.9	2.6	2.2
GCF_000215625.1	MusPutFur1.0	Mustela putorius	Carnivora	Mustelidae	Mustela putorius [MusPutFur1.0]	95.2	94.6	0.6	2.5	2.3
GCF_000004335.2	AilMel_1.0	Ailuropoda melanoleuca	Carnivora	Ursidae	Ailuropoda melanoleuca [AilMel_1.0]	95.2	94.9	0.3	2.6	2.2
GCF_900631625.1	zalCal2.2	Zalophus californianus	Carnivora	Otariidae	Zalophus californianus [zalCal2.2]	95.3	93.8	1.5	2.2	2.5
GCF_000002285.3	CanFam3.1	Canis lupus	Carnivora	Canidae	Canis lupus [CanFam3.1]	95.3	94	1.3	2.4	2.3
GCF_000181335.3	Felis_catus_9.0	Felis catus	Carnivora	Felidae	Felis catus [Felis_catus_9]	95.3	94.9	0.4	2.4	2.3
GCA_004886185.1	Basenji_breed-1.1	Canis lupus	Carnivora	Canidae	Canis lupus [Basenji_breed-1.1]	95.5	94.1	1.4	2.1	2.4
GCA_008641055.1	ASM864105v1	Canis lupus	Carnivora	Canidae	Canis lupus [ASM864105v1]	95.5	94.2	1.3	2.1	2.4
GCF_001857705.1	PanPar1.0	Panthera pardus	Carnivora	Felidae	Panthera pardus [PanPar1.0]	95.5	94.7	0.8	2.3	2.2
GCA_008692635.1	BGI_CrCroc_1.0	Crocuta crocuta	Carnivora	Hyaenidae	Crocuta crocuta [BGI_CrCroc_1.0]	95.5	95	0.5	2.5	2
GCA_003009895.1	ASM300989v1	Hyaena hyaena	Carnivora	Hyaenidae	Hyaena hyaena [ASM300989v1]	95.6	94.9	0.7	2.4	2
GCA_004348235.1	GSC_HSeal_1.0	Phoca vitulina	Carnivora	Phocidae	Phoca vitulina [GSC_HSeal_1.0]	95.7	94.5	1.2	2	2.3
GCF_003254725.1	ASM325472v1	Canis lupus dingo	Carnivora	Canidae	Canis lupus [ASM325472v1]	95.8	94.4	1.4	1.9	2.3
GCA_009660055.1	ASM966005v1	Ursus thibetanus	Carnivora	Ursidae	Ursus thibetanus [ASM966005v1]	95.8	94.4	1.4	1.8	2.4
GCA_900108605.1	NNQGG.v01	Neovison vison	Carnivora	Mustelidae	Neovison vison [NNQGG.v01]	95.8	95.2	0.6	2.2	2
GCF_000239315.1	MusPutFurMale1.0	Mustela putorius	Carnivora	Mustelidae	Mustela putorius [MusPutFurMale1]	96	95.3	0.7	1.9	2.1
GCF_002288905.2	ASM228890v2	Enhydra lutris	Carnivora	Mustelidae	Enhydra lutris [ASM228890v2]	96.1	95.1	1	1.9	2
GCF_003584765.1	ASM358476v1	Ursus arctos	Carnivora	Ursidae	Ursus arctos [ASM358476v1]	96.1	95.2	0.9	1.9	2
GCA_008795835.1	PanLeo1.0	Panthera leo	Carnivora	Felidae	Panthera leo [PanLeo1.0]	96.2	95.6	0.6	1.9	1.9
GCF_003709585.1	Aci_jub_2	Acinonyx jubatus	Carnivora	Felidae	Acinonyx jubatus [Aci_jub_2]	96.3	95.8	0.5	1.8	1.9
																														OZYME		5011047776	DMFS5-005925	FA721157	2018-11-29	231	231
																														OZYME		5011552967	CPPUMR5554	FA735354	2019-06-21	278	278
																														OZYME		5011557751	CPPUMR5554	FA735706	2019-06-25	318	318
																														OZYME		5011557751	CPPUMR5554	FA735706	2019-06-25	305	305
																														PROMEGA FRANCE		5010672710	DMFS5-004724	214080521	2018-06-22	123.75	123.75
																														PROMEGA FRANCE		5010672710	DMFS5-004724	214080521	2018-06-22	25	25
																														QIAGEN FRANCE SAS		5010483389	DMFS5-004110	940397421	2018-03-22	203.68	203.68
																														QIAGEN FRANCE SAS		5010483389	DMFS5-004110	940397421	2018-03-22	432.44	432.44
																														QIAGEN FRANCE SAS		5010504434	DMFS5-004162	940398425	2018-04-04	241.2	241.2
																														QIAGEN FRANCE SAS		5010504434	DMFS5-004162	940398425	2018-04-04	495.03	495.03
																														QIAGEN FRANCE SAS		5010945256	DMFS5-005564	940411863	2018-10-11	1638.7	1638.7
																														QIAGEN FRANCE SAS		5011236883	DMFS5-006423	940419564	2019-02-08	4338.88	4338.88
																														QIAGEN FRANCE SAS		5011318871	DMFS5-006602	940421333	2019-03-06	178.39	178.39
																														QIAGEN FRANCE SAS		5011318871	DMFS5-006602	940421333	2019-03-06	162.87	162.87
																														ROCHE DIAGNOSTICS FRANCE		5010618982	DMFS5-004548	1723732994	2018-05-28	1066.42	1066.42
																														ROCHE DIAGNOSTICS FRANCE		5010813553	DMFS5-005168	1723761500	2018-08-20	1066.42	1066.42
																														ROCHE DIAGNOSTICS FRANCE		5011229908	DMFS5-006419	1723817939	2019-02-07	546.53	546.53
																														ROCHE DIAGNOSTICS FRANCE		5011332888	DMFS5-006675	1723831536	2019-03-22	1512.09	1512.09
																														ROCHE DIAGNOSTICS FRANCE		5011328326	DMFS5-006700	1723832137	2019-03-26	1008.06	1008.06
																														SIGMA ALDRICH CHIMIE		5010947760	CPPUMR5554	8052218423	2018-09-17	513.74	513.74
																														SIGMA ALDRICH CHIMIE		5010966538	CPPUMR5554	8052226131	2018-10-02	268	268
																														SIGMA ALDRICH CHIMIE		5011502448	CPPUMR5554	8052355921	2019-06-11	23	23
																														SIGMA ALDRICH CHIMIE		5011502448	CPPUMR5554	8052355921	2019-06-11	23	23
																														SIGMA ALDRICH CHIMIE		5011502448	CPPUMR5554	8052355921	2019-06-11	230	230
																														SIGMA ALDRICH CHIMIE		5011502448	CPPUMR5554	8052355921	2019-06-11	23	23
																														SOCIETY FOR MOLECULAR BIOLOGY		5011361498	CA13-1903-102160	G754141100	2019-03-31	26.56
																														SOCIETY FOR MOLECULAR BIOLOGY		5011523000	CA13-1905-104116	K1833920542	2019-05-31	26.75
																														SOCIETY FOR MOLECULAR BIOLOGY		5011523222	CA13-1905-104338	R4278570374	2019-05-31	8.96
																														THE ROYAL SOCIETY		5010597741	DMFS5-004328	738298	2018-04-25	2040
																														TRANSMITTING SCIENCE SL		5010515209	CA13-1803-90836	CARTE ACHAT	2018-03-31	561.75	561.75
																														UGAP - UNION DES GROUPEMENTS D'ACHA	482	5010388017	CPPUMR5554	0053303565	2018-02-22	30.79	30.79
																														UGAP - UNION DES GROUPEMENTS D'ACHA		5010460967	CPPUMR5554	0053419712	2018-03-27	143.25	143.25
																														UGAP - UNION DES GROUPEMENTS D'ACHA		5010460967	CPPUMR5554	0053419712	2018-03-27	207.14	207.14
																														UGAP - UNION DES GROUPEMENTS D'ACHA	482	5010388017	CPPUMR5554	0053303565	2018-02-22	30.79	30.79
																														UGAP - UNION DES GROUPEMENTS D'ACHA		5010479236	CPPUMR5554	0053462315	2018-04-05	403.63	403.63
																														UGAP - UNION DES GROUPEMENTS D'ACHA	482	5010512421	CPPUMR5554	0053493709	2018-04-17	34.22	34.22
																														UGAP - UNION DES GROUPEMENTS D'ACHA		5010498482	CPPUMR5554	0053480085	2018-04-11	37.27	37.27
																														UGAP - UNION DES GROUPEMENTS D'ACHA	482	5010512424	CPPUMR5554	0053493710	2018-04-17	68.43	68.43
																														UGAP - UNION DES GROUPEMENTS D'ACHA	482	5010572300	CPPUMR5554	0053569911	2018-05-14	76.65	76.65
																														UGAP - UNION DES GROUPEMENTS D'ACHA	482	5010645751	CPPUMR5554	0053694662	2018-06-14	342.17	342.17
																														UGAP - UNION DES GROUPEMENTS D'ACHA	482	5010645751	CPPUMR5554	0053694662	2018-06-14	342.17	342.17
																														UGAP - UNION DES GROUPEMENTS D'ACHA	482	5010645751	CPPUMR5554	0053694662	2018-06-14	171.08	171.08
																														UGAP - UNION DES GROUPEMENTS D'ACHA	482	5010645751	CPPUMR5554	0053694662	2018-06-14	171.08	171.08
																														UGAP - UNION DES GROUPEMENTS D'ACHA	482	5010600115	CPPUMR5554	0053605207	2018-05-24	111.27	111.27
																														Unité de logistique internationale		5010748772		90477008	2018-03-23	34
																														UNIVERSITE DE MONTPELLIER		5011597179	CPPUMR5554	210025707	2019-07-03	12.95	12.95
																														UPS - UNITED PARCEL SERVICE FRANCE		5010849286	CA13-1808-95793	CARTE ACHAT	2018-08-31	359	356
																														WIX		5011074360	CA13-1811-98732	25552012721	2018-11-30	192
