# Supplementary material for: High-quality carnivoran genomes from roadkill samples enable comparative species delineation in aardwolf and bat-eared fox
Source: eLife. 2021 Feb 18;10:e63167. doi: 10.7554/eLife.63167 (PMC7963486; doi:10.7554/eLife.63167)
Supplement: Supplementary file 5. [file elife-63167-supp5.xlsx]

## Sheet: Table S2 - Supermatrix composit
Species	Maker annotated genes	Number of orthologous genes after cleaning	Missing data
Acinonyx_jubatus	NA	12751	16.54
Ailuropoda_melanoleuca	NA	13411	9.57
Ailurus_fulgens	17619	11675	26.14
Arctocephalus_gazella	13714	8390	60.29
Bassariscus_sumichrasti	17573	11713	26.97
Callorhinus_ursinus	46164	7398	53.35
Canis_lupus_familiaris	NA	13808	6.04
Crocuta_Crocuta	16828	11525	29.17
Cryptoprocta_ferox	18199	12244	20.82
Enhydra_lutris	NA	13746	4.67
Eumetopias_jubatus	39926	8515	46.70
Felis_catus	NA	13047	11.98
Gulo_gulo	19696	8939	48.42
Helogale_parvula	18484	12005	23.92
Hyaena_hyaena	17663	12169	22.27
Leptonychotes_weddellii	NA	12439	22.57
Lutra_lutra	32278	12304	19.89
Lycaon_pictus	18068	11405	27.75
Lynx_canadensis	44864	7203	56.76
Lynx_pardinus	31025	9961	39.55
Manis_javanica	NA	12441	18.81
Mellivora_capensis	18194	12146	22.63
Mirounga_angustirostris	32777	12305	19.37
Mungos_mungo	18832	12241	21.30
Mustela_putorius	NA	13172	8.70
Nasua_narica	16858	11442	29.08
Neofelis_nebulosa	29785	12614	18.28
Neomonachus_schauinslandi	NA	13690	5.80
Neovison_vison	17294	11848	26.03
Odobenus_rosmarus	NA	13705	5.14
Otocyon_megalotis	18996	11981	22.02
Panthera_leo	17539	12162	22.91
Panthera_onca	16942	11758	27.22
Panthera_pardus	NA	13731	5.49
Panthera_tigris	NA	12841	15.37
Paradoxurus_hermaphroditus	17278	11387	30.18
Phoca_vitulina	18387	12057	22.73
Potos_flavus	27890	12234	22.80
Prionailurus_bengalensis	18057	12172	22.88
Procyon_lotor	16572	11165	32.46
Proteles_septentrionalis	NA	12050	22.43
Proteles_cristatus	17570	12062	22.96
Pteronura_brasiliensis	18445	12332	20.62
Puma_concolor	23358	10853	28.62
Spilogale_gracilis	17606	11744	26.61
Suricata_suricatta	17398	11707	26.32
Taxidea_taxus	15586	10141	42.19
Ursus_americanus	17694	11670	27.53
Ursus_arctos	18003	12145	22.21
Ursus_maritimus	NA	13111	13.56
Ursus_thibetanus	18365	12092	22.87
Vulpes_vulpes	18511	11688	26.02
Zalophus_californianus	NA	6305	64.65
