# Supplementary material for: High-quality carnivoran genomes from roadkill samples enable comparative species delineation in aardwolf and bat-eared fox
Source: eLife. 2021 Feb 18;10:e63167. doi: 10.7554/eLife.63167 (PMC7963486; doi:10.7554/eLife.63167)
Supplement: Supplementary file 6. [file elife-63167-supp6.xlsx]

## Sheet: Feuil1
Post-orbital breadth	P. c. cristatus	P. c. septentrionalis
N samples	16	8
Mean	30.97	35.14
95% conf.	(29.56 - 32.37)	(33.84 - 36.43)
Variance	6.96	2.40
t tests for equal means
Difference between means	4.17
95% conf. interval (parametric)	(2.06 - 6.28)
95% conf. interval (bootstrap)	(2.55 - 5.76)
t	4.1022	p (same mean) = 0.0004701	Critical t value (p=0.05) = 2.074
Unequal variance t	4.8639	p (same mean) = 8.0558E-05
Monte Carlo permutation p (same mean)	0.0009
Exact permutation p (same mean)	0.0006
F test for equal variances
F	2.9035	p (same variance) = 0.15928
Critical F value (p=0.05)	4.5678
Monte Carlo permutation p (same variance)	0.0638
Exact permutation p (same variance)	0.0610
Condylobasal length	P. c. cristatus	P. c. septentrionalis
N samples	14	7
Mean	136.19	136.71
95% conf.	(133.44 - 138.94)	(131.55 - 141.88)
Variance	22.66	31.24
t tests for equal means
Difference between means	0.52
95% conf. interval (parametric)	(-4.36 - 5.40)
95% conf. interval (bootstrap)	(-3.85 - 5.09)
t	0.2236	p (same mean) = 0.82543	Critical t value (p=0.05) = 2.093
Unequal variance t	0.2114	p (same mean) = 0.83659
Monte Carlo permutation p (same mean)	0.8265
Exact permutation p (same mean)	0.8266
F test for equal variances
F	1.3783	p (same variance) = 0.58781
Critical F value (p=0.05)	3.6043
Monte Carlo permutation p (same variance)	0.6635
Exact permutation p (same variance)	0.6617
Zygomatic width	P. c. cristatus	P. c. septentrionalis
N samples	10	8
Mean	80.33	80.75
95% conf.	(78.68 - 81.98)	(76.45 - 85.05)
Variance	5.31	26.50
t tests for equal means
Difference between means	0.42
95% conf. interval (parametric)	(-3.42 - 4.26)
95% conf. interval (bootstrap)	(-3.04 - 4.15)
t	0.2319	p (same mean) = 0.81956	Critical t value (p=0.05) = 2.120
Unequal variance t	0.2142	p (same mean) = 0.83501
Monte Carlo permutation p (same mean)	0.8188
Exact permutation p (same mean)	0.8230
F test for equal variances
F	4.9936	p (same variance) = 0.02921
Critical F value (p=0.05)	4.1970
Monte Carlo permutation p (same variance)	0.0832
Exact permutation p (same variance)	0.0796
Brain case width	P. c. cristatus	P. c. septentrionalis
N samples	16	4
Mean	47.28	45.95
95% conf.	(46.15 - 48.40)	(44.64 - 47.26)
Variance	4.46	0.68
t tests for equal means
Difference between means	1.33
95% conf. interval (parametric)	(-0.97 - 3.62)
95% conf. interval (bootstrap)	(0.06 - 2.52)
t	1.2111	p (same mean) = 0.24151	Critical t value (p=0.05) = 2.101
Unequal variance t	1.9797	p (same mean) = 0.06830
Monte Carlo permutation p (same mean)	0.2540
Exact permutation p (same mean)	0.2675
F test for equal variances
F	6.5921	p (same variance) = 0.14604
Critical F value (p=0.05)	14.253
Monte Carlo permutation p (same variance)	0.2578
Exact permutation p (same variance)	0.2497
Inter-orbital breadth	P. c. cristatus	P. c. septentrionalis
N samples	16	4
Mean	27.74	31.63
95% conf.	(26.33 - 29.14)	(24.83 - 38.42)
Variance	6.94	18.23
t tests for equal means
Difference between means	3.89
95% conf. interval (parametric)	(0.40 - 7.38)
95% conf. interval (bootstrap)	(0.29 - 7.80)
t	2.3411	p (same mean) = 0.030936	Critical t value (p=0.05) = 2.101
Unequal variance t	1.7401	p (same mean) = 0.16491
Monte Carlo permutation p (same mean)	0.0274
Exact permutation p (same mean)	0.0289
F test for equal variances
F	2.6257	p (same variance) = 0.17702
Critical F value (p=0.05)	4.1528
Monte Carlo permutation p (same variance)	0.3181
Exact permutation p (same variance)	0.3182
Mandible length	P. c. cristatus	P. c. septentrionalis
N samples	7	7
Mean	94.57	95.57
95% conf.	(93.01 - 96.14)	(91.76 - 99.38)
Variance	2.87	16.95
t tests for equal means
Difference between means	1
95% conf. interval (parametric)	(-2.67 - 4.67)
95% conf. interval (bootstrap)	(-2.00 - 4.07)
t	0.5943	p (same mean) = 0.56337	Critical t value (p=0.05) = 2.179
Unequal variance t	0.5942	p (same mean) = 0.56881
Monte Carlo permutation p (same mean)	0.5889
Exact permutation p (same mean)	0.5973
F test for equal variances
F	5.9087	p (same variance) = 0.048245
Critical F value (p=0.05)	5.8198
Monte Carlo permutation p (same variance)	0.1030
Exact permutation p (same variance)	0.1131
