# Supplementary material for: High-quality carnivoran genomes from roadkill samples enable comparative species delineation in aardwolf and bat-eared fox
Source: eLife. 2021 Feb 18;10:e63167. doi: 10.7554/eLife.63167 (PMC7963486; doi:10.7554/eLife.63167)
Supplement: Supplementary file 9. [file elife-63167-supp9.xlsx]

## Sheet: Table S3 - Node calibrations.cs
Node	upper limit (My)	lower limit (My)
Felis_catus,Lynx_lynx	NA	5.3
Felis_catus,Panthera_onca	16.4	NA
Felis_catus,Prionodon_pardicolor	NA	28.5
Proteles_cristatus_cristatus_TS307,Hyaena_hyaena	16.4	NA
Urva_javanica,Fossa_fossana_FMNH156648_SRR6053060	NA	16.4
Proteles_cristatus_cristatus_TS307,Urva_javanica	NA	16.4
Civettictis_civetta,Genetta_servalina	NA	11.2
Canis_lupus,Urocyon_cinereoargenteus	NA	5.3
Mephitis_mephitis,Spilogale_putorius	NA	1.8
Procyon_lotor,Nasua_nasua	NA	11.2
Nasua_nasua,Ailurus_fulgens	NA	16.4
Arctocephalus_pusillus,Zalophus_californianus	NA	1.8
Mirounga_leonina,Phoca_fasciata	NA	11.2
Arctocephalus_pusillus,Phoca_fasciata	NA	16.4
Arctocephalus_pusillus,Nasua_nasua	NA	28.5
Ursus_arctos,Ailuropoda_melanoleuca	NA	3.5
Canis_lupus,Ursus_arctos	NA	37
Felis_catus,Canis_lupus	65.8	50
