# Supplementary material for: High-quality carnivoran genomes from roadkill samples enable comparative species delineation in aardwolf and bat-eared fox
Source: eLife. 2021 Feb 18;10:e63167. doi: 10.7554/eLife.63167 (PMC7963486; doi:10.7554/eLife.63167)
Supplement: Supplementary file 10. [file elife-63167-supp10.xlsx]

## Sheet: Table S4 - Blobtools results Pr
Contigs name	length	GC	N	bam0	superkingdom.t.	superkingdom.s.	superkingdom.c.	phylum.t.	phylum.s.	phylum.c.	order.t.	order.s.	order.c.	family.t.	family.s.	family.c.	genus.t.	genus.s.	genus.c	species.t.	species.s.	species.c.
scf7180000019764	243696	0.549	0	26.627	Eukaryota	86243.0	0	Chordata	86243.0	0	Carnivora	63847.0	2	Felidae	40403.0	5	Myotis	14178.0	7	Myotis lucifugus	14178.0	7
scf7180000018798	577059	0.3806	0	51.8235	Eukaryota	36159.0	0	Chordata	36159.0	0	Carnivora	36159.0	0	Felidae	36159.0	0	Felis	32511.0	1	Felis catus	32511.0	1
scf7180000018868	2190210	0.4599	0	52.2105	Eukaryota	70011.0	0	Chordata	70011.0	0	Carnivora	70011.0	0	Felidae	70011.0	0	Panthera	35446.0	3	Panthera tigris	20908.0	4
scf7180000020080	191413	0.3863	0	50.2408	Eukaryota	22926.0	0	Chordata	22926.0	0	Carnivora	22926.0	0	Felidae	22926.0	0	Felis	20606.0	1	Felis catus	20606.0	1
scf7180000018202	1533268	0.4004	0	51.1355	Eukaryota	87671.0	0	Chordata	87671.0	0	Chiroptera	77540.0	1	Pteropodidae	64576.0	2	Pteropus	64576.0	2	Pteropus vampyrus	64576.0	2
scf7180000019289	1200804	0.4881	0	51.7095	Eukaryota	48033.0	0	Chordata	48033.0	0	Carnivora	48033.0	0	Felidae	48033.0	0	Felis	48033.0	0	Felis catus	48033.0	0
scf7180000018426	747129	0.3934	0	50.2791	Eukaryota	47238.0	0	Chordata	47238.0	0	Carnivora	47238.0	0	Felidae	47238.0	0	Felis	47238.0	0	Felis catus	47238.0	0
scf7180000018222	1146792	0.4271	0	51.3568	Eukaryota	47154.0	0	Chordata	47154.0	0	Carnivora	47154.0	0	Felidae	47154.0	0	Felis	47154.0	0	Felis catus	47154.0	0
scf7180000022685	19858	0.3658	0	24.0854	Eukaryota	16434.0	0	Chordata	16434.0	0	Carnivora	16434.0	0	Felidae	16434.0	0	Felis	13135.0	1	Felis catus	13135.0	1
scf7180000023524	16013	0.4635	0	264.7461	no-hit	0.0	0	no-hit	0.0	0	no-hit	0.0	0	no-hit	0.0	0	no-hit	0.0	0	no-hit	0.0	0
scf7180000018077	1220306	0.4075	0	51.7414	Eukaryota	45867.0	0	Chordata	45867.0	0	Carnivora	45867.0	0	Felidae	45867.0	0	Felis	45867.0	0	Felis catus	45867.0	0
scf7180000019404	26794	0.3691	0	40.6337	Eukaryota	45503.0	0	Chordata	45503.0	0	Carnivora	45503.0	0	Felidae	45503.0	0	Felis	45503.0	0	Felis catus	45503.0	0
scf7180000024076	270767	0.5343	0	48.3743	Eukaryota	39635.0	0	Chordata	39635.0	0	Carnivora	39635.0	0	Felidae	35683.0	1	Felis	12831.0	3	Felis catus	12831.0	4
scf7180000017716	1827474	0.4385	0	54.8365	Eukaryota	46722.0	0	Chordata	46722.0	0	Carnivora	46722.0	0	Felidae	41994.0	1	Felis	41994.0	1	Felis catus	41994.0	1
scf7180000021069	77262	0.5219	0	25.7213	Eukaryota	25577.0	0	Chordata	25577.0	0	Carnivora	25577.0	0	Felidae	23335.0	1	Felis	10880.0	3	Felis catus	10880.0	3
scf7180000020487	86335	0.3782	0	24.8687	Eukaryota	41644.0	0	Chordata	41644.0	0	Carnivora	41644.0	0	Felidae	41644.0	0	Felis	41644.0	0	Felis catus	41644.0	0
scf7180000019981	190780	0.502	0	48.4149	Eukaryota	30442.0	0	Chordata	30442.0	0	Carnivora	30442.0	0	Felidae	30442.0	0	Felis	27317.0	1	Felis catus	27317.0	1
scf7180000017734	2171113	0.4033	0	149.4	Eukaryota	47744.0	0	Chordata	47744.0	0	Carnivora	47744.0	0	Felidae	47744.0	0	Felis	47744.0	0	Felis catus	47744.0	0
scf7180000024217	40114	0.4147	0	25.8054	Eukaryota	13864.0	0	Chordata	13864.0	0	Carnivora	9364.0	1	Felidae	5014.0	2	Homo	4500.0	5	Homo sapiens	4500.0	5
scf7180000023617	36846	0.4314	0	219.0538	Eukaryota	25965.0	0	Chordata	25965.0	0	Carnivora	25965.0	0	Felidae	25965.0	0	Felis	23340.0	1	Felis catus	23340.0	1
scf7180000018291	49098	0.4353	0	23.0116	Eukaryota	8791.0	0	Chordata	8791.0	0	Carnivora	8791.0	0	Felidae	8791.0	0	Felis	8791.0	0	Felis catus	8791.0	0
scf7180000023401	21449	0.5084	0	444.7426	no-hit	0.0	0	no-hit	0.0	0	no-hit	0.0	0	no-hit	0.0	0	no-hit	0.0	0	no-hit	0.0	0
scf7180000022724	753140	0.381	0	49.9012	Eukaryota	77751.0	0	Chordata	77751.0	0	Carnivora	77751.0	0	Felidae	77751.0	0	Felis	31723.0	3	Felis catus	31723.0	3
scf7180000022010	17094	0.6245	0	43.4068	Eukaryota	3077.0	0	Chordata	3077.0	0	Carnivora	3077.0	0	Felidae	3077.0	0	Neofelis	1052.0	3	Neofelis nebulosa	1052.0	3
scf7180000019399	459695	0.525	0	50.6346	Eukaryota	15148.0	0	Chordata	15148.0	0	Carnivora	15148.0	0	Felidae	15148.0	0	Felis	15148.0	0	Felis catus	15148.0	0
scf7180000021504	34952	0.4437	0	24.1287	Eukaryota	3031.0	0	Chordata	3031.0	0	Carnivora	2029.0	2	Felidae	1775.0	3	Felis	1529.0	4	Felis catus	1529.0	4
scf7180000017553	3454165	0.4388	100	50.8685	Eukaryota	59366.0	0	Chordata	59366.0	0	Carnivora	59366.0	0	Otariidae	31099.0	2	Zalophus	19799.0	3	Zalophus californianus	19799.0	3
scf7180000020837	493940	0.4851	0	50.8566	Eukaryota	45361.0	0	Chordata	45361.0	0	Carnivora	45361.0	0	Felidae	45361.0	0	Felis	45361.0	0	Felis catus	45361.0	0
scf7180000023964	424273	0.4021	0	50.0544	Eukaryota	31409.0	0	Chordata	31409.0	0	Carnivora	31409.0	0	Felidae	31409.0	0	Felis	28212.0	1	Felis catus	28212.0	1
scf7180000017801	157278	0.4087	0	50.0343	Eukaryota	24293.0	0	Chordata	24293.0	0	Carnivora	24293.0	0	Ursidae	11785.0	3	Ursus	9428.0	4	Enhydra lutris	6972.0	5
scf7180000018883	1766658	0.355	0	49.6766	Eukaryota	45895.0	0	Chordata	45895.0	0	Carnivora	45895.0	0	Felidae	45895.0	0	Felis	45895.0	0	Felis catus	45895.0	0
scf7180000017950	6746	0.4363	0	31.0747	Eukaryota	6061.0	0	Chordata	6061.0	0	Carnivora	6061.0	0	Felidae	6061.0	0	Panthera	2630.0	3	Panthera pardus	2630.0	3
scf7180000019486	36037	0.4013	0	26.2249	Eukaryota	18183.0	0	Chordata	18183.0	0	Carnivora	18183.0	0	Felidae	18183.0	0	Felis	18183.0	0	Felis catus	18183.0	0
scf7180000022089	13796	0.3723	0	23.1244	Eukaryota	22813.0	0	Chordata	22813.0	0	Carnivora	22813.0	0	Felidae	22813.0	0	Felis	20478.0	1	Felis catus	20478.0	1
scf7180000021905	22830	0.378	0	139.4408	Eukaryota	7224.0	0	Chordata	7224.0	0	Artiodactyla	7224.0	0	Bovidae	7224.0	0	Ovis	7224.0	0	Ovis canadensis	7224.0	0
scf7180000020293	95889	0.5046	0	51.0563	Eukaryota	11552.0	0	Chordata	11552.0	0	Carnivora	11552.0	0	Felidae	3802.0	4	Panthera	2782.0	7	Panthera pardus	2782.0	8
scf7180000021729	18284	0.6844	0	37.1841	Eukaryota	4293.0	0	Chordata	4293.0	0	Carnivora	2328.0	2	Felidae	2328.0	2	Panthera	2328.0	3	Panthera pardus	2328.0	3
scf7180000018056	1248890	0.4313	0	52.3533	Eukaryota	110664.0	0	Chordata	110664.0	0	Carnivora	110664.0	0	Herpestidae	88648.0	1	Suricata	88648.0	1	Suricata suricatta	88648.0	1
scf7180000018589	8497	0.6368	0	23.2147	Eukaryota	2810.0	0	Chordata	2810.0	0	Carnivora	2810.0	0	Felidae	2810.0	0	Acinonyx	1686.0	2	Acinonyx jubatus	1686.0	2
scf7180000023405	49458	0.4252	0	447.1669	Eukaryota	257405.0	0	Chordata	257405.0	0	Carnivora	257405.0	0	Hyaenidae	257405.0	0	Proteles	155760.0	1	Proteles cristata	155760.0	1
scf7180000024056	403309	0.4882	0	50.0853	Eukaryota	49237.0	0	Chordata	49237.0	0	Carnivora	49237.0	0	Felidae	30317.0	1	Suricata	18920.0	4	Suricata suricatta	18920.0	4
scf7180000022064	494461	0.6029	0	56.5757	Eukaryota	37657.0	0	Chordata	37657.0	0	Carnivora	37657.0	0	Herpestidae	14379.0	3	Suricata	14379.0	3	Suricata suricatta	14379.0	3
scf7180000020286	179851	0.5497	0	48.9308	Eukaryota	29598.0	0	Chordata	29598.0	0	Carnivora	29598.0	0	Felidae	17720.0	3	Panthera	7754.0	7	Panthera pardus	7754.0	7
scf7180000017567	3007162	0.4136	0	51.7504	Eukaryota	68649.0	0	Chordata	68649.0	0	Carnivora	68649.0	0	Otariidae	48204.0	1	Zalophus	34316.0	2	Zalophus californianus	34316.0	2
scf7180000021066	89970	0.4061	0	27.0949	Eukaryota	25058.0	0	Chordata	25058.0	0	Carnivora	25058.0	0	Felidae	25058.0	0	Felis	22535.0	1	Felis catus	22535.0	1
scf7180000017564	2626601	0.3964	0	51.5511	Eukaryota	46831.0	0	Chordata	46831.0	0	Carnivora	46831.0	0	Felidae	46831.0	0	Felis	42367.0	1	Felis catus	42367.0	1
scf7180000018292	831567	0.3757	0	50.0144	Eukaryota	47588.0	0	Chordata	47588.0	0	Carnivora	47588.0	0	Felidae	33293.0	1	Panthera	19016.0	2	Suricata suricatta	14295.0	3
scf7180000022488	25035	0.4088	0	641.2338	no-hit	0.0	0	no-hit	0.0	0	no-hit	0.0	0	no-hit	0.0	0	no-hit	0.0	0	no-hit	0.0	0
scf7180000018584	633984	0.5653	0	60.3949	Eukaryota	24751.0	0	Chordata	24751.0	0	Carnivora	24751.0	0	Felidae	24751.0	0	Felis	22244.0	1	Felis catus	22244.0	1
scf7180000020950	121823	0.3504	0	25.1808	Eukaryota	35319.0	0	Chordata	35319.0	0	Carnivora	35319.0	0	Felidae	35319.0	0	Felis	35319.0	0	Felis catus	35319.0	0
scf7180000024095	99731	0.3798	0	45.0903	Eukaryota	27732.0	0	Chordata	27732.0	0	Carnivora	27732.0	0	Felidae	10855.0	4	Enhydra	5718.0	8	Enhydra lutris	5718.0	8
scf7180000022926	56260	0.3883	0	389.4935	Eukaryota	22508.0	0	Chordata	22508.0	0	Carnivora	22508.0	0	Felidae	22508.0	0	Felis	20232.0	1	Felis catus	20232.0	1
scf7180000018820	710686	0.4333	0	52.2269	Eukaryota	44836.0	0	Chordata	44836.0	0	Carnivora	44836.0	0	Felidae	44836.0	0	Felis	44836.0	0	Felis catus	44836.0	0
scf7180000024169	201225	0.583	0	49.4164	Eukaryota	15963.0	0	Chordata	15963.0	0	Carnivora	15963.0	0	Felidae	15963.0	0	Lynx	6291.0	2	Lynx canadensis	6291.0	2
scf7180000018857	615695	0.399	0	50.8342	Eukaryota	46871.0	0	Chordata	46871.0	0	Carnivora	46871.0	0	Felidae	46871.0	0	Felis	46871.0	0	Felis catus	46871.0	0
scf7180000017887	564532	0.4542	0	54.4798	Eukaryota	47046.0	0	Chordata	47046.0	0	Carnivora	47046.0	0	Felidae	47046.0	0	Felis	41866.0	1	Felis catus	41866.0	1
scf7180000020307	195061	0.4904	0	50.7788	Eukaryota	8314.0	0	Chordata	8314.0	0	Primates	4470.0	3	Hominidae	4470.0	3	Homo	3640.0	6	Homo sapiens	3640.0	6
scf7180000020748	27449	0.4235	0	236.79	Eukaryota	10456.0	0	Chordata	10456.0	0	Carnivora	10456.0	0	Felidae	10456.0	0	Felis	9408.0	1	Felis catus	9408.0	1
scf7180000021684	19970	0.3918	0	26.0572	Eukaryota	3333.0	0	Chordata	3333.0	0	Carnivora	2111.0	2	Felidae	2111.0	2	Felis	1602.0	3	Felis catus	1602.0	3
scf7180000020317	124926	0.5093	0	53.8853	Eukaryota	9791.0	0	Chordata	9791.0	0	Carnivora	9791.0	0	Otariidae	2888.0	4	Suricata	2025.0	7	Suricata suricatta	2025.0	7
scf7180000023341	32699	0.3971	0	298.9623	Eukaryota	6641.0	0	Chordata	6641.0	0	Carnivora	6641.0	0	Felidae	6641.0	0	Felis	6641.0	0	Felis catus	6641.0	0
scf7180000022500	12180	0.4664	0	26.355	Eukaryota	1999.0	0	Chordata	1999.0	0	Carnivora	1999.0	0	Felidae	1795.0	1	Felis	1373.0	2	Felis catus	1373.0	2
scf7180000023646	31873	0.4908	0	153.0658	no-hit	0.0	0	no-hit	0.0	0	no-hit	0.0	0	no-hit	0.0	0	no-hit	0.0	0	no-hit	0.0	0
scf7180000018442	324316	0.4153	0	47.0553	Eukaryota	32568.0	0	Chordata	32568.0	0	Carnivora	32568.0	0	Felidae	32568.0	0	Felis	29269.0	1	Felis catus	29269.0	1
scf7180000021325	15783	0.4609	0	108.8593	Eukaryota	1999.0	0	Chordata	1999.0	0	Carnivora	1999.0	0	Felidae	1999.0	0	Felis	1786.0	1	Felis catus	1786.0	1
scf7180000021446	38346	0.5913	0	53.303	Eukaryota	4919.0	0	Chordata	4919.0	0	Carnivora	4438.0	1	Felidae	1501.0	5	Eumetopias	1443.0	7	Eumetopias jubatus	1443.0	7
scf7180000017488	2918418	0.4262	0	50.2882	Eukaryota	46542.0	0	Chordata	46542.0	0	Carnivora	46542.0	0	Felidae	46542.0	0	Felis	46542.0	0	Felis catus	46542.0	0
scf7180000022444	8275	0.3768	0	46.359	Eukaryota	2838.0	0	Chordata	2838.0	0	Artiodactyla	2168.0	1	Suidae	2168.0	2	Sus	2168.0	3	Sus scrofa	2168.0	3
scf7180000023790	288043	0.4508	0	51.168	Eukaryota	23615.0	0	Chordata	23615.0	0	Carnivora	23615.0	0	Felidae	21040.0	1	Panthera	10309.0	3	Acinonyx jubatus	6405.0	4
scf7180000021443	17030	0.6402	0	100.8082	Eukaryota	2278.0	0	Chordata	2278.0	0	Carnivora	2278.0	0	Felidae	2061.0	1	Felis	1818.0	2	Felis catus	1818.0	2
scf7180000020030	143999	0.3678	0	26.8141	Eukaryota	29525.0	0	Chordata	29525.0	0	Carnivora	29525.0	0	Felidae	29525.0	0	Felis	26592.0	1	Felis catus	26592.0	1
scf7180000019700	282420	0.3532	0	25.5411	Eukaryota	13650.0	0	Chordata	13650.0	0	Carnivora	6797.0	2	Felidae	6797.0	2	Felis	5685.0	4	Felis catus	5685.0	4
scf7180000018297	697474	0.4384	0	49.2584	Eukaryota	25341.0	0	Chordata	25341.0	0	Carnivora	16561.0	2	Felidae	16561.0	2	Panthera	7093.0	6	Mus musculus	5583.0	7
scf7180000019929	41564	0.414	0	41.7716	Eukaryota	17263.0	0	Chordata	17263.0	0	Carnivora	17263.0	0	Felidae	17263.0	0	Felis	15532.0	1	Felis catus	15532.0	1
scf7180000018896	527229	0.3771	0	49.0611	Eukaryota	31042.0	0	Chordata	31042.0	0	Carnivora	31042.0	0	Felidae	31042.0	0	Felis	27850.0	1	Felis catus	27850.0	1
scf7180000020326	76052	0.4843	0	25.6879	Eukaryota	4194.0	0	Chordata	4194.0	0	Carnivora	3916.0	1	Felidae	3302.0	2	Lynx	1756.0	4	Lynx canadensis	1756.0	4
scf7180000018979	466745	0.4018	0	51.2276	Eukaryota	44735.0	0	Chordata	44735.0	0	Carnivora	44735.0	0	Felidae	44735.0	0	Felis	44735.0	0	Felis catus	44735.0	0
scf7180000017679	2648614	0.4787	0	51.6572	Eukaryota	56062.0	0	Chordata	56062.0	0	Carnivora	56062.0	0	Felidae	56062.0	0	Panthera	25255.0	2	Panthera pardus	25255.0	2
scf7180000021860	68107	0.3768	0	50.4065	Eukaryota	45811.0	0	Chordata	45811.0	0	Carnivora	45811.0	0	Felidae	45811.0	0	Felis	41321.0	1	Felis catus	41321.0	1
scf7180000019127	103679	0.3736	0	47.6642	Eukaryota	24996.0	0	Chordata	24996.0	0	Carnivora	24996.0	0	Felidae	24996.0	0	Felis	22477.0	1	Felis catus	22477.0	1
scf7180000020731	126174	0.4113	0	26.07	Eukaryota	16383.0	0	Chordata	16383.0	0	Carnivora	16383.0	0	Ursidae	4597.0	4	Enhydra	3085.0	7	Enhydra lutris	3085.0	8
scf7180000021171	57804	0.3913	100	23.3069	Eukaryota	35121.0	0	Chordata	35121.0	0	Carnivora	35121.0	0	Felidae	35121.0	0	Felis	35121.0	0	Felis catus	35121.0	0
scf7180000022458	36566	0.3755	100	25.3972	Eukaryota	30152.0	0	Chordata	30152.0	0	Carnivora	30152.0	0	Felidae	30152.0	0	Felis	27193.0	1	Felis catus	27193.0	1
scf7180000024208	60126	0.469	0	39.354	Eukaryota	28534.0	0	Chordata	28534.0	0	Carnivora	28534.0	0	Felidae	28534.0	0	Felis	25680.0	1	Felis catus	25680.0	1
scf7180000020295	129833	0.3967	0	25.789	Eukaryota	40911.0	0	Chordata	40911.0	0	Carnivora	40911.0	0	Otariidae	11619.0	4	Zalophus	11619.0	4	Zalophus californianus	11619.0	4
scf7180000020213	181269	0.4538	0	25.6701	Eukaryota	70658.0	0	Chordata	70658.0	0	Carnivora	70658.0	0	Otariidae	32275.0	2	Zalophus	19365.0	6	Zalophus californianus	19365.0	6
scf7180000023980	564333	0.4101	0	49.4376	Eukaryota	77180.0	0	Chordata	77180.0	0	Carnivora	77180.0	0	Felidae	77180.0	0	Felis	30944.0	2	Felis catus	30944.0	3
scf7180000019219	96989	0.4	0	46.8639	Eukaryota	19985.0	0	Chordata	19985.0	0	Carnivora	19985.0	0	Felidae	16822.0	1	Felis	11387.0	5	Felis catus	11387.0	5
scf7180000024164	162693	0.3931	0	26.3603	Eukaryota	44423.0	0	Chordata	44423.0	0	Carnivora	44423.0	0	Felidae	44423.0	0	Felis	44423.0	0	Felis catus	44423.0	0
scf7180000022321	12749	0.3629	0	20.607	Eukaryota	38815.0	0	Chordata	38815.0	0	Carnivora	38815.0	0	Felidae	38815.0	0	Felis	38815.0	0	Felis catus	38815.0	0
scf7180000018786	14867	0.3721	0	20.5679	Eukaryota	42283.0	0	Chordata	42283.0	0	Carnivora	42283.0	0	Felidae	42283.0	0	Felis	42283.0	0	Felis catus	42283.0	0
scf7180000021799	43634	0.4228	0	53.7462	Eukaryota	37191.0	0	Chordata	37191.0	0	Carnivora	37191.0	0	Felidae	28743.0	2	Felis	18015.0	3	Felis catus	18015.0	3
scf7180000021686	46452	0.4554	100	46.0453	Eukaryota	13718.0	0	Chordata	13718.0	0	Carnivora	13718.0	0	Felidae	13718.0	0	Felis	12340.0	1	Felis catus	12340.0	1
scf7180000021851	39131	0.4153	0	47.6608	Eukaryota	15941.0	0	Chordata	15941.0	0	Carnivora	15941.0	0	Felidae	15941.0	0	Felis	14319.0	1	Felis catus	14319.0	1
scf7180000022762	5910	0.3937	0	26.8017	Eukaryota	16253.0	0	Chordata	16253.0	0	Carnivora	16253.0	0	Felidae	11474.0	2	Panthera	4846.0	6	Panthera tigris	3246.0	8
scf7180000021173	67799	0.3986	0	24.9673	Eukaryota	10760.0	0	Chordata	10760.0	0	Carnivora	10760.0	0	Felidae	10760.0	0	Felis	9672.0	1	Felis catus	9672.0	1
scf7180000019226	356145	0.475	0	49.4477	Eukaryota	36737.0	0	Chordata	36737.0	0	Carnivora	36737.0	0	Felidae	36737.0	0	Felis	36737.0	0	Felis catus	36737.0	0
scf7180000018509	11053	0.4241	0	37.428	Eukaryota	4720.0	1	Chordata	4720.0	1	Primates	2409.0	6	Hominidae	2409.0	6	Homo	2409.0	7	Homo sapiens	2409.0	7
scf7180000023154	94934	0.4879	0	356.9305	Eukaryota	37454.0	0	Chordata	37454.0	0	Carnivora	37454.0	0	Felidae	25884.0	2	Acinonyx	11154.0	5	Acinonyx jubatus	11154.0	5
scf7180000020167	143775	0.3707	0	25.4125	Eukaryota	45638.0	0	Chordata	45638.0	0	Carnivora	45638.0	0	Felidae	45638.0	0	Felis	45638.0	0	Felis catus	45638.0	0
scf7180000020815	77625	0.394	0	24.7481	Eukaryota	32206.0	0	Chordata	32206.0	0	Carnivora	32206.0	0	Felidae	32206.0	0	Felis	32206.0	0	Felis catus	32206.0	0
scf7180000024015	519630	0.4481	0	50.5294	Eukaryota	28424.0	0	Chordata	28424.0	0	Carnivora	28424.0	0	Felidae	28424.0	0	Lynx	11382.0	3	Lynx canadensis	11382.0	3
scf7180000023979	868964	0.4264	0	49.7009	Eukaryota	27099.0	0	Chordata	27099.0	0	Carnivora	27099.0	0	Felidae	27099.0	0	Felis	21659.0	1	Felis catus	21659.0	1
scf7180000022027	13782	0.4307	0	166.4797	Eukaryota	2216.0	0	Chordata	2216.0	0	Carnivora	2216.0	0	Felidae	2216.0	0	Felis	1567.0	2	Felis catus	1567.0	2
scf7180000019391	278999	0.4232	0	50.121	Eukaryota	33587.0	0	Chordata	33587.0	0	Carnivora	33587.0	0	Felidae	33587.0	0	Felis	20191.0	3	Felis catus	20191.0	3
scf7180000021733	61142	0.3896	0	25.5646	Eukaryota	42721.0	0	Chordata	42721.0	0	Carnivora	42721.0	0	Felidae	42721.0	0	Felis	38473.0	1	Felis catus	38473.0	1
scf7180000023472	17012	0.4778	0	119.5587	no-hit	0.0	0	no-hit	0.0	0	no-hit	0.0	0	no-hit	0.0	0	no-hit	0.0	0	no-hit	0.0	0
scf7180000021972	31023	0.3955	0	25.7446	Eukaryota	22881.0	0	Chordata	22881.0	0	Carnivora	22881.0	0	Felidae	22881.0	0	Felis	20585.0	1	Felis catus	20585.0	1
scf7180000019042	16784	0.5807	0	32.6551	Eukaryota	7106.0	1	Chordata	7106.0	1	Carnivora	4579.0	2	Felidae	2313.0	5	Homo	1740.0	7	Homo sapiens	1740.0	7
scf7180000019589	282655	0.5226	0	52.5781	Eukaryota	27623.0	0	Chordata	27623.0	0	Carnivora	27623.0	0	Felidae	27623.0	0	Felis	22043.0	1	Felis catus	22043.0	1
scf7180000021690	40861	0.3794	0	24.946	Eukaryota	12781.0	0	Chordata	12781.0	0	Carnivora	12781.0	0	Felidae	12781.0	0	Lynx	5100.0	3	Lynx canadensis	5100.0	4
scf7180000022669	9649	0.396	0	22.0077	Eukaryota	3596.0	0	Chordata	3596.0	0	Carnivora	3596.0	0	Felidae	3596.0	0	Felis	3259.0	1	Felis catus	3259.0	1
scf7180000021097	90879	0.5595	0	46.33	Eukaryota	14438.0	0	Chordata	14438.0	0	Primates	4701.0	6	Hominidae	4701.0	6	Homo	4701.0	6	Homo sapiens	4701.0	6
scf7180000023333	28284	0.6988	0	226.6362	no-hit	0.0	0	no-hit	0.0	0	no-hit	0.0	0	no-hit	0.0	0	no-hit	0.0	0	no-hit	0.0	0
scf7180000020131	205951	0.4842	0	54.6258	Eukaryota	37342.0	0	Chordata	37342.0	0	Carnivora	37342.0	0	Felidae	37342.0	0	Felis	37342.0	0	Felis catus	37342.0	0
scf7180000017802	4531	0.4083	0	17.1243	Eukaryota	16627.0	0	Chordata	16627.0	0	Carnivora	16627.0	0	Felidae	16627.0	0	Felis	14983.0	1	Felis catus	14983.0	1
scf7180000019540	17359	0.3932	0	310.9078	Eukaryota	8155.0	0	Chordata	8155.0	0	Carnivora	8155.0	0	Felidae	8155.0	0	Felis	8155.0	0	Felis catus	8155.0	0
scf7180000019238	432620	0.3878	0	51.5375	Eukaryota	36402.0	0	Chordata	36402.0	0	Carnivora	36402.0	0	Felidae	36402.0	0	Lynx	32778.0	1	Lynx canadensis	32778.0	1
scf7180000021148	98883	0.4933	0	28.1855	Eukaryota	21948.0	0	Chordata	21948.0	0	Carnivora	21948.0	0	Felidae	21948.0	0	Felis	13176.0	2	Felis catus	13176.0	3
scf7180000018835	535201	0.3878	0	51.3609	Eukaryota	46848.0	0	Chordata	46848.0	0	Carnivora	46848.0	0	Felidae	46848.0	0	Felis	46848.0	0	Felis catus	46848.0	0
scf7180000017609	559565	0.4227	0	50.0026	Eukaryota	45253.0	0	Chordata	45253.0	0	Carnivora	45253.0	0	Felidae	45253.0	0	Felis	45253.0	0	Felis catus	45253.0	0
scf7180000021579	64327	0.3885	0	24.3103	Eukaryota	34248.0	0	Chordata	34248.0	0	Carnivora	34248.0	0	Felidae	34248.0	0	Felis	34248.0	0	Felis catus	34248.0	0
scf7180000021505	22591	0.4316	0	75.4181	Eukaryota	2218.0	0	Chordata	2218.0	0	Carnivora	2218.0	0	Felidae	2218.0	0	Felis	1358.0	2	Felis catus	1358.0	2
scf7180000020412	288925	0.4018	0	25.5592	Eukaryota	35187.0	0	Chordata	35187.0	0	Primates	25458.0	3	Hominidae	22524.0	4	Pan	11284.0	5	Pan troglodytes	11284.0	5
scf7180000021376	48471	0.3962	0	25.0607	Eukaryota	23765.0	0	Chordata	23765.0	0	Carnivora	23765.0	0	Felidae	23765.0	0	Felis	21367.0	1	Felis catus	21367.0	1
scf7180000024103	222960	0.4353	0	25.8775	Eukaryota	9372.0	0	Chordata	9372.0	0	Carnivora	6417.0	1	Felidae	6417.0	1	Felis	6417.0	2	Felis catus	6417.0	2
scf7180000017633	2030613	0.354	0	49.6539	Eukaryota	47360.0	0	Chordata	47360.0	0	Carnivora	47360.0	0	Felidae	47360.0	0	Felis	47360.0	0	Felis catus	47360.0	0
scf7180000023282	160462	0.4231	0	193.5061	Eukaryota	24366.0	0	Chordata	24366.0	0	Carnivora	24366.0	0	Felidae	24366.0	0	Felis	20226.0	1	Felis catus	20226.0	1
scf7180000023612	32879	0.4249	0	413.2004	Eukaryota	256605.0	0	Chordata	256605.0	0	Carnivora	256605.0	0	Hyaenidae	256605.0	0	Proteles	155086.0	1	Proteles cristata	155086.0	1
scf7180000023672	26493	0.5572	0	231.5131	Eukaryota	3702.0	0	Chordata	3702.0	0	Carnivora	3702.0	0	Felidae	3702.0	0	unresolved	1104.0	4	unresolved	1104.0	4
scf7180000021740	22993	0.5103	0	45.7094	Eukaryota	18785.0	0	Chordata	18785.0	0	Carnivora	18785.0	0	Felidae	18785.0	0	Felis	18785.0	0	Felis catus	18785.0	0
scf7180000017947	1458176	0.4748	0	52.7043	Eukaryota	65405.0	0	Chordata	65405.0	0	Carnivora	53172.0	1	Otariidae	13890.0	7	Zalophus	7304.0	9	Zalophus californianus	7304.0	9
scf7180000018116	443227	0.38	0	48.3902	Eukaryota	46490.0	0	Chordata	46490.0	0	Carnivora	46490.0	0	Felidae	46490.0	0	Felis	46490.0	0	Felis catus	46490.0	0
scf7180000018409	1439750	0.347	0	48.3084	Eukaryota	46843.0	0	Chordata	46843.0	0	Carnivora	46843.0	0	Felidae	46843.0	0	Felis	46843.0	0	Felis catus	46843.0	0
scf7180000019874	254373	0.4898	0	60.4681	Eukaryota	40372.0	0	Chordata	40372.0	0	Carnivora	40372.0	0	Felidae	40372.0	0	Felis	40372.0	0	Felis catus	40372.0	0
scf7180000020456	200900	0.4391	0	51.4508	Eukaryota	37449.0	0	Chordata	37449.0	0	Carnivora	37449.0	0	Felidae	37449.0	0	Felis	37449.0	0	Felis catus	37449.0	0
scf7180000019014	45606	0.4311	0	42.2237	Eukaryota	45638.0	0	Chordata	45638.0	0	Carnivora	45638.0	0	Felidae	45638.0	0	Felis	45638.0	0	Felis catus	45638.0	0
scf7180000021143	85587	0.5049	0	51.0859	Eukaryota	40704.0	0	Chordata	40704.0	0	Carnivora	40704.0	0	Herpestidae	29511.0	1	Suricata	29511.0	1	Suricata suricatta	29511.0	1
scf7180000018788	990746	0.4361	0	52.2592	Eukaryota	45141.0	0	Chordata	45141.0	0	Carnivora	45141.0	0	Felidae	45141.0	0	Felis	45141.0	0	Felis catus	45141.0	0
scf7180000020567	121068	0.4427	0	47.9773	Eukaryota	34626.0	0	Chordata	34626.0	0	Carnivora	34626.0	0	Felidae	34626.0	0	Felis	34626.0	0	Felis catus	34626.0	0
scf7180000022055	45088	0.3624	0	24.6026	Eukaryota	10523.0	0	Chordata	10523.0	0	Carnivora	9509.0	1	Felidae	8509.0	2	Felis	8509.0	2	Felis catus	8509.0	2
scf7180000022398	6922	0.4522	0	54.7948	Eukaryota	2043.0	0	Chordata	2043.0	0	Carnivora	2043.0	0	Felidae	2043.0	0	Felis	1633.0	1	Felis catus	1633.0	1
scf7180000018485	684302	0.358	0	51.9701	Eukaryota	46683.0	0	Chordata	46683.0	0	Carnivora	46683.0	0	Felidae	46683.0	0	Felis	46683.0	0	Felis catus	46683.0	0
scf7180000020867	191725	0.3589	0	24.8459	Eukaryota	45695.0	0	Chordata	45695.0	0	Carnivora	45695.0	0	Felidae	45695.0	0	Felis	45695.0	0	Felis catus	45695.0	0
scf7180000017869	1399245	0.4172	0	50.9823	Eukaryota	63277.0	0	Chordata	63277.0	0	Carnivora	63277.0	0	Felidae	35966.0	2	Felis	30160.0	3	Felis catus	30160.0	3
scf7180000017644	326107	0.4285	0	49.6858	Eukaryota	45521.0	0	Chordata	45521.0	0	Carnivora	45521.0	0	Felidae	45521.0	0	Felis	45521.0	0	Felis catus	45521.0	0
scf7180000018632	24872	0.3868	0	26.0662	Eukaryota	29226.0	0	Chordata	29226.0	0	Carnivora	29226.0	0	Felidae	29226.0	0	Felis	29226.0	0	Felis catus	29226.0	0
scf7180000018755	3538416	0.369	100	47.6326	Eukaryota	47476.0	0	Chordata	47476.0	0	Carnivora	47476.0	0	Felidae	47476.0	0	Felis	47476.0	0	Felis catus	47476.0	0
scf7180000018065	1150586	0.4496	0	52.1986	Eukaryota	39668.0	0	Chordata	39668.0	0	Carnivora	39668.0	0	Felidae	35625.0	1	Felis	18378.0	4	Felis catus	18378.0	5
scf7180000022596	13360	0.4793	0	26.4911	Eukaryota	5801.0	0	Chordata	5801.0	0	Primates	3248.0	3	Hominidae	3248.0	3	Homo	2451.0	4	Homo sapiens	2451.0	4
scf7180000021040	81077	0.4294	0	108.8076	Eukaryota	47722.0	0	Chordata	47722.0	0	Carnivora	47722.0	0	Felidae	47722.0	0	Felis	47722.0	0	Felis catus	47722.0	0
scf7180000022189	22380	0.3839	0	283.7979	Eukaryota	10083.0	0	Chordata	10083.0	0	Apterygiformes	9019.0	1	Apterygidae	9019.0	1	Apteryx	9019.0	1	Apteryx mantelli	9019.0	1
scf7180000019205	397960	0.3925	0	50.3888	Eukaryota	43024.0	0	Chordata	43024.0	0	Carnivora	43024.0	0	Felidae	43024.0	0	Acinonyx	16377.0	2	Acinonyx jubatus	16377.0	2
scf7180000017589	905364	0.38	0	49.4284	Eukaryota	47785.0	0	Chordata	47785.0	0	Carnivora	47785.0	0	Felidae	47785.0	0	Felis	47785.0	0	Felis catus	47785.0	0
scf7180000021843	43478	0.383	0	26.285	Eukaryota	5803.0	0	Chordata	5247.0	1	Carnivora	5247.0	1	Felidae	5247.0	1	Felis	4080.0	3	Felis catus	4080.0	3
scf7180000018088	307265	0.3718	0	49.8909	Eukaryota	44553.0	0	Chordata	44553.0	0	Carnivora	44553.0	0	Felidae	44553.0	0	Felis	40115.0	1	Felis catus	40115.0	1
scf7180000017702	1816899	0.3949	0	50.9003	Eukaryota	63437.0	0	Chordata	63437.0	0	Carnivora	63437.0	0	Felidae	37929.0	1	Suricata	25508.0	3	Suricata suricatta	25508.0	3
scf7180000020757	95670	0.3578	0	47.4221	Eukaryota	12593.0	0	Chordata	12593.0	0	Carnivora	12593.0	0	Felidae	12593.0	0	Felis	11337.0	1	Felis catus	11337.0	1
scf7180000022339	22602	0.4707	0	26.5324	Eukaryota	7001.0	0	Chordata	7001.0	0	Carnivora	7001.0	0	Felidae	7001.0	0	Felis	7001.0	0	Felis catus	7001.0	0
scf7180000019614	163139	0.4579	0	86.8506	Eukaryota	2580.0	0	Chordata	2580.0	0	Carnivora	2580.0	0	Felidae	2580.0	0	Felis	2341.0	1	Felis catus	2341.0	1
scf7180000023941	616232	0.3822	0	49.4469	Eukaryota	77537.0	0	Chordata	77537.0	0	Carnivora	77537.0	0	Felidae	62234.0	2	Acinonyx	15698.0	6	Acinonyx jubatus	15698.0	6
scf7180000019158	610481	0.3874	0	50.6785	Eukaryota	47177.0	0	Chordata	47177.0	0	Carnivora	47177.0	0	Felidae	47177.0	0	Felis	47177.0	0	Felis catus	47177.0	0
scf7180000021697	49515	0.4065	0	24.3224	Eukaryota	42428.0	0	Chordata	42428.0	0	Carnivora	42428.0	0	Felidae	42428.0	0	Felis	42428.0	0	Felis catus	42428.0	0
scf7180000023828	2085795	0.4054	0	51.341	Eukaryota	52144.0	0	Chordata	52144.0	0	Carnivora	52144.0	0	Felidae	52144.0	0	Panthera	30195.0	1	Panthera tigris	30195.0	1
scf7180000019140	7600	0.4036	0	23.1214	Eukaryota	38307.0	0	Chordata	38307.0	0	Carnivora	38307.0	0	Felidae	38307.0	0	Felis	38307.0	0	Felis catus	38307.0	0
scf7180000017467	2537210	0.3743	0	49.5808	Eukaryota	61891.0	0	Chordata	61891.0	0	Carnivora	61891.0	0	Felidae	35111.0	1	Suricata	26780.0	3	Suricata suricatta	26780.0	3
scf7180000021018	43325	0.4762	0	53.9124	Eukaryota	6829.0	0	Chordata	6829.0	0	Carnivora	5144.0	1	Felidae	3955.0	2	Apteryx	1685.0	4	Apteryx mantelli	1685.0	4
scf7180000020605	89527	0.4155	0	48.3013	Eukaryota	12936.0	0	Chordata	12936.0	0	Carnivora	12936.0	0	Felidae	10377.0	1	Felis	10377.0	1	Felis catus	10377.0	1
scf7180000018021	925919	0.352	0	49.7989	Eukaryota	47635.0	0	Chordata	47635.0	0	Carnivora	47635.0	0	Felidae	47635.0	0	Felis	47635.0	0	Felis catus	47635.0	0
scf7180000017530	134959	0.4555	0	43.9679	Eukaryota	5849.0	0	Chordata	5849.0	0	Carnivora	5849.0	0	Felidae	2972.0	2	Felis	2347.0	3	Felis catus	2347.0	4
scf7180000018909	423202	0.3577	0	48.257	Eukaryota	41373.0	0	Chordata	41373.0	0	Carnivora	41373.0	0	Felidae	41373.0	0	Felis	41373.0	0	Felis catus	41373.0	0
scf7180000022295	9598	0.5206	0	75.1543	no-hit	0.0	0	no-hit	0.0	0	no-hit	0.0	0	no-hit	0.0	0	no-hit	0.0	0	no-hit	0.0	0
scf7180000023871	1805027	0.4112	0	52.4478	Eukaryota	60390.0	0	Chordata	60390.0	0	Carnivora	60390.0	0	Felidae	60390.0	0	Felis	55675.0	1	Felis catus	55675.0	1
scf7180000024247	4903089	0.4449	100	51.3268	Eukaryota	65448.0	1	Chordata	65448.0	1	Carnivora	39441.0	2	Felidae	23627.0	5	Homo	18066.0	7	Homo sapiens	18066.0	7
scf7180000020045	31822	0.5043	0	341.4967	Eukaryota	5925.0	0	Chordata	5925.0	0	Carnivora	5925.0	0	Phocidae	2416.0	2	Leptonychotes	1812.0	4	Leptonychotes weddellii	1812.0	4
scf7180000022410	14010	0.6187	0	53.1033	Eukaryota	2880.0	0	Chordata	2880.0	0	Primates	1380.0	3	Hominidae	1380.0	4	Homo	1380.0	4	Homo sapiens	1380.0	4
scf7180000021932	50222	0.632	0	43.3177	Eukaryota	2338.0	0	Chordata	2338.0	0	Carnivora	2338.0	0	Felidae	2092.0	1	Felis	1386.0	3	Felis catus	1386.0	3
scf7180000022309	30289	0.4833	0	26.4175	Eukaryota	3075.0	0	Chordata	3075.0	0	Carnivora	1677.0	2	Felidae	1396.0	3	Felis	1396.0	3	Felis catus	1396.0	3
scf7180000023789	1204302	0.3591	0	49.7919	Eukaryota	45452.0	0	Chordata	45452.0	0	Carnivora	45452.0	0	Felidae	45452.0	0	Felis	45452.0	0	Felis catus	45452.0	0
scf7180000023682	81091	0.4402	0	250.18	Eukaryota	22446.0	0	Chordata	22446.0	0	Carnivora	22446.0	0	Felidae	22446.0	0	Felis	20250.0	1	Felis catus	20250.0	1
scf7180000019029	478818	0.405	0	51.3615	Eukaryota	26062.0	0	Chordata	26062.0	0	Carnivora	26062.0	0	Felidae	26062.0	0	Felis	23406.0	1	Felis catus	23406.0	1
scf7180000021147	51749	0.5904	0	27.1415	Eukaryota	13551.0	0	Chordata	13551.0	0	Primates	7223.0	1	Hominidae	7223.0	1	Homo	7223.0	3	Homo sapiens	7223.0	4
scf7180000022587	5130	0.6413	0	46.9907	Eukaryota	1765.0	0	Chordata	1765.0	0	Carnivora	1765.0	0	Felidae	1554.0	1	Felis	1374.0	2	Felis catus	1374.0	2
scf7180000024014	546622	0.3859	0	49.5061	Eukaryota	41149.0	0	Chordata	41149.0	0	Carnivora	41149.0	0	Felidae	41149.0	0	Felis	41149.0	0	Felis catus	41149.0	0
scf7180000018330	6996	0.3836	0	35.8015	Eukaryota	31896.0	0	Chordata	31896.0	0	Carnivora	31896.0	0	Felidae	31896.0	0	Felis	28621.0	1	Felis catus	28621.0	1
scf7180000021585	22492	0.4611	0	48.3066	Eukaryota	3374.0	0	Chordata	3374.0	0	Carnivora	2774.0	1	Felidae	1563.0	3	Ursus	915.0	5	Acinonyx jubatus	646.0	7
scf7180000023719	20262	0.5621	0	60.2803	Eukaryota	2760.0	0	Chordata	2760.0	0	Carnivora	2760.0	0	Felidae	2488.0	1	Felis	1366.0	2	Felis catus	1366.0	2
scf7180000020276	147945	0.4515	0	50.9858	Eukaryota	31090.0	0	Chordata	31090.0	0	Carnivora	31090.0	0	Felidae	18514.0	1	Suricata	12576.0	3	Suricata suricatta	12576.0	3
scf7180000024032	457909	0.3776	0	50.1927	Eukaryota	52986.0	0	Chordata	52986.0	0	Carnivora	52986.0	0	Felidae	47739.0	1	Acinonyx	31770.0	2	Acinonyx jubatus	31770.0	2
scf7180000020038	26310	0.5271	0	143.2775	Eukaryota	12702.0	0	Chordata	12702.0	0	Carnivora	12702.0	0	Felidae	12702.0	0	Felis	12702.0	0	Felis catus	12702.0	0
scf7180000021352	54820	0.5941	0	46.6552	Eukaryota	3310.0	1	Chordata	3310.0	1	Primates	1298.0	3	Hominidae	1298.0	4	Homo	1298.0	5	Homo sapiens	1298.0	5
scf7180000022317	30644	0.3883	0	26.1114	Eukaryota	10003.0	0	Chordata	10003.0	0	Carnivora	5680.0	2	Felidae	5680.0	3	Felis	4760.0	5	Felis catus	4760.0	5
scf7180000017834	1591862	0.3823	0	49.5783	Eukaryota	40178.0	0	Chordata	40178.0	0	Carnivora	40178.0	0	Felidae	40178.0	0	Felis	36207.0	1	Felis catus	36207.0	1
scf7180000024279	1139041	0.4538	100	50.3311	Eukaryota	38744.0	0	Chordata	38744.0	0	Carnivora	31422.0	1	Felidae	27222.0	2	Felis	17551.0	5	Felis catus	17551.0	5
scf7180000021189	158736	0.3977	0	51.3561	Eukaryota	14061.0	0	Chordata	14061.0	0	Carnivora	8526.0	1	Felidae	6385.0	2	Homo	5535.0	3	Homo sapiens	5535.0	3
scf7180000020063	177436	0.436	0	54.1775	Eukaryota	29165.0	0	Chordata	29165.0	0	Carnivora	29165.0	0	Felidae	29165.0	0	Felis	29165.0	0	Felis catus	29165.0	0
scf7180000019766	188734	0.4508	0	26.2068	Eukaryota	56803.0	0	Chordata	56803.0	0	Carnivora	56803.0	0	Felidae	45862.0	2	Felis	16800.0	6	Felis catus	16800.0	6
scf7180000021978	833325	0.3607	0	48.1858	Eukaryota	79009.0	0	Chordata	79009.0	0	Perissodactyla	43746.0	2	Equidae	43746.0	2	Equus	43746.0	2	Equus caballus	43746.0	2
scf7180000023193	26309	0.4202	0	180.0185	Eukaryota	12155.0	0	Chordata	12155.0	0	Carnivora	12155.0	0	Felidae	12155.0	0	Felis	10958.0	1	Felis catus	10958.0	1
scf7180000021583	63329	0.4266	0	28.6035	Eukaryota	45623.0	0	Chordata	45623.0	0	Carnivora	45623.0	0	Felidae	45623.0	0	Felis	45623.0	0	Felis catus	45623.0	0
scf7180000019351	402163	0.3717	0	50.649	Eukaryota	47873.0	0	Chordata	47873.0	0	Carnivora	47873.0	0	Felidae	47873.0	0	Felis	47873.0	0	Felis catus	47873.0	0
scf7180000023869	1418468	0.3515	0	49.0297	Eukaryota	44645.0	0	Chordata	44645.0	0	Carnivora	44645.0	0	Felidae	44645.0	0	Felis	44645.0	0	Felis catus	44645.0	0
scf7180000018178	1007144	0.4145	0	51.5457	Eukaryota	51756.0	0	Chordata	51756.0	0	Carnivora	46583.0	1	Herpestidae	28161.0	2	Suricata	28161.0	3	Suricata suricatta	28161.0	3
scf7180000022316	10964	0.4048	0	17.9799	Eukaryota	17470.0	0	Chordata	17470.0	0	Carnivora	17470.0	0	Felidae	17470.0	0	Felis	17470.0	0	Felis catus	17470.0	0
scf7180000018335	915963	0.3607	0	49.5363	Eukaryota	51299.0	0	Chordata	51299.0	0	Carnivora	37942.0	2	Felidae	32401.0	3	Panthera	14529.0	6	Panthera pardus	9688.0	7
scf7180000021991	17875	0.5604	0	238.7119	Eukaryota	3628.0	0	Chordata	3628.0	0	Carnivora	3628.0	0	Felidae	3628.0	0	Panthera	1474.0	4	Panthera pardus	1110.0	5
scf7180000023957	1143563	0.4201	0	50.9764	Eukaryota	47431.0	0	Chordata	47431.0	0	Carnivora	47431.0	0	Felidae	47431.0	0	Felis	47431.0	0	Felis catus	47431.0	0
scf7180000020497	117319	0.3731	0	25.5389	Eukaryota	46345.0	0	Chordata	46345.0	0	Carnivora	46345.0	0	Felidae	46345.0	0	Felis	46345.0	0	Felis catus	46345.0	0
scf7180000020471	20202	0.4385	0	35.3016	Eukaryota	45182.0	0	Chordata	45182.0	0	Carnivora	45182.0	0	Felidae	45182.0	0	Felis	45182.0	0	Felis catus	45182.0	0
scf7180000024188	62815	0.5152	0	50.321	Eukaryota	8188.0	1	Chordata	8188.0	1	Artiodactyla	2984.0	4	Bovidae	2984.0	5	Homo	1837.0	7	Homo sapiens	1837.0	7
scf7180000020998	107798	0.3597	0	23.2486	Eukaryota	30532.0	0	Chordata	30532.0	0	Carnivora	30532.0	0	Felidae	30532.0	0	Felis	30532.0	0	Felis catus	30532.0	0
scf7180000023878	1294451	0.3848	0	50.0066	Eukaryota	82753.0	0	Chordata	82753.0	0	Carnivora	82753.0	0	Felidae	82753.0	0	Panthera	57988.0	2	Panthera pardus	33124.0	3
scf7180000023186	45055	0.3912	0	457.1076	Eukaryota	45834.0	0	Chordata	45834.0	0	Carnivora	45834.0	0	Felidae	45834.0	0	Felis	45834.0	0	Felis catus	45834.0	0
scf7180000018674	1001290	0.5112	0	54.3116	Eukaryota	38767.0	0	Chordata	38767.0	0	Carnivora	38767.0	0	Felidae	38767.0	0	Felis	20819.0	1	Felis catus	20819.0	1
scf7180000020969	66899	0.3633	0	24.2469	Eukaryota	20287.0	0	Chordata	20287.0	0	Carnivora	20287.0	0	Felidae	20287.0	0	Felis	18281.0	1	Felis catus	18281.0	1
scf7180000020734	67512	0.6631	0	52.4711	Eukaryota	5524.0	0	Chordata	5524.0	0	Carnivora	3000.0	2	Ursidae	1564.0	4	Ailuropoda	1564.0	5	Ailuropoda melanoleuca	1564.0	5
scf7180000019556	29813	0.4628	0	252.6318	Eukaryota	16638.0	0	Chordata	16638.0	0	Carnivora	16638.0	0	Felidae	16638.0	0	Felis	14957.0	1	Felis catus	14957.0	1
scf7180000017569	2460404	0.389	0	50.8581	Eukaryota	47786.0	0	Chordata	47786.0	0	Carnivora	47786.0	0	Felidae	47786.0	0	Felis	47786.0	0	Felis catus	47786.0	0
scf7180000019946	470430	0.5389	0	49.9114	Eukaryota	16723.0	0	Chordata	16723.0	0	Carnivora	16723.0	0	Felidae	16723.0	0	Felis	16723.0	0	Felis catus	16723.0	0
scf7180000022663	21240	0.3462	0	23.6952	Eukaryota	7492.0	0	Chordata	7492.0	0	Carnivora	7492.0	0	Felidae	7492.0	0	Felis	4490.0	1	Felis catus	4490.0	1
scf7180000020785	62416	0.5356	0	50.2818	Eukaryota	9322.0	0	Chordata	9322.0	0	Carnivora	9322.0	0	Felidae	6585.0	2	Lynx	1890.0	7	Lynx canadensis	1890.0	8
scf7180000022241	20332	0.3917	0	31.6493	Eukaryota	34390.0	0	Chordata	34390.0	0	Carnivora	34390.0	0	Felidae	34390.0	0	Felis	34390.0	0	Felis catus	34390.0	0
scf7180000017953	1617104	0.3962	0	50.5772	Eukaryota	51055.0	0	Chordata	51055.0	0	Carnivora	42078.0	1	Felidae	42078.0	1	Felis	42078.0	1	Felis catus	42078.0	1
scf7180000021155	44387	0.4331	0	26.0255	Eukaryota	11585.0	0	Chordata	11585.0	0	Carnivora	5761.0	2	Felidae	5761.0	2	Felis	5761.0	3	Felis catus	5761.0	3
scf7180000022481	35953	0.4316	0	371.886	Eukaryota	47065.0	0	Chordata	47065.0	0	Carnivora	47065.0	0	Felidae	47065.0	0	Felis	47065.0	0	Felis catus	47065.0	0
scf7180000019529	336502	0.4849	0	51.9642	Eukaryota	21121.0	0	Chordata	21121.0	0	Carnivora	21121.0	0	Felidae	11805.0	1	Felis	9838.0	2	Felis catus	9838.0	2
scf7180000021467	47903	0.3833	0	24.4898	Eukaryota	42098.0	0	Chordata	42098.0	0	Carnivora	42098.0	0	Felidae	42098.0	0	Felis	37911.0	1	Felis catus	37911.0	1
scf7180000017743	144661	0.3793	0	53.4991	Eukaryota	49588.0	0	Chordata	49588.0	0	Carnivora	49588.0	0	Felidae	49588.0	0	Felis	44601.0	1	Felis catus	44601.0	1
scf7180000020563	703959	0.4224	0	49.0875	Eukaryota	46346.0	0	Chordata	46346.0	0	Carnivora	46346.0	0	Felidae	46346.0	0	Lynx	27986.0	1	Lynx canadensis	27986.0	1
scf7180000017500	3537076	0.3806	0	50.5448	Eukaryota	49002.0	0	Chordata	49002.0	0	Carnivora	49002.0	0	Felidae	49002.0	0	Panthera	34230.0	2	Panthera pardus	29310.0	3
scf7180000017608	51545	0.3736	0	22.6682	Eukaryota	45678.0	0	Chordata	45678.0	0	Carnivora	45678.0	0	Felidae	45678.0	0	Felis	45678.0	0	Felis catus	45678.0	0
scf7180000023932	928190	0.6257	0	50.6331	Eukaryota	34862.0	0	Chordata	34862.0	0	Carnivora	32427.0	1	Felidae	15544.0	3	Acinonyx	15544.0	3	Acinonyx jubatus	15544.0	3
scf7180000019624	288939	0.4357	0	52.4552	Eukaryota	19971.0	0	Chordata	19971.0	0	Carnivora	19971.0	0	Felidae	19971.0	0	Felis	17961.0	1	Felis catus	17961.0	1
scf7180000020669	103366	0.5378	0	49.5457	Eukaryota	9265.0	1	Chordata	9265.0	1	Carnivora	8345.0	2	Felidae	8345.0	2	Felis	7150.0	3	Felis catus	7150.0	3
scf7180000018093	400926	0.4516	0	52.1849	Eukaryota	58823.0	0	Chordata	58823.0	0	Carnivora	58823.0	0	Felidae	41977.0	3	Panthera	13270.0	6	Panthera pardus	13270.0	6
scf7180000018650	619964	0.4009	0	50.5578	Eukaryota	63887.0	0	Chordata	63887.0	0	Carnivora	63887.0	0	Felidae	52333.0	1	Lynx	29625.0	4	Lynx canadensis	29625.0	4
scf7180000019893	176759	0.5672	0	50.1956	Eukaryota	13500.0	0	Chordata	13500.0	0	Carnivora	13500.0	0	Felidae	13500.0	0	Felis	10800.0	1	Felis catus	10800.0	1
scf7180000020768	95493	0.4753	0	27.0621	Eukaryota	49118.0	0	Chordata	49118.0	0	Carnivora	49118.0	0	Herpestidae	29428.0	1	Suricata	29428.0	2	Suricata suricatta	29428.0	2
scf7180000018028	1132451	0.5161	0	52.4253	Eukaryota	182148.0	0	Chordata	182148.0	0	Carnivora	182148.0	0	Felidae	114954.0	2	Panthera	76756.0	3	Panthera pardus	76756.0	3
scf7180000018878	346506	0.3727	0	48.854	Eukaryota	42168.0	0	Chordata	42168.0	0	Carnivora	42168.0	0	Felidae	42168.0	0	Felis	42168.0	0	Felis catus	42168.0	0
scf7180000021386	17152	0.5209	0	49.3927	no-hit	0.0	0	no-hit	0.0	0	no-hit	0.0	0	no-hit	0.0	0	no-hit	0.0	0	no-hit	0.0	0
scf7180000017864	1476014	0.3623	0	49.7984	Eukaryota	47951.0	0	Chordata	47951.0	0	Carnivora	47951.0	0	Felidae	41788.0	1	Felis	37204.0	2	Felis catus	37204.0	2
scf7180000020532	132224	0.4857	0	26.0368	Eukaryota	13742.0	0	Chordata	13742.0	0	Rodentia	3126.0	4	Muridae	3126.0	4	Rousettus	3083.0	6	Rousettus aegyptiacus	3083.0	6
scf7180000018648	432020	0.3912	0	55.8115	Eukaryota	46722.0	0	Chordata	46722.0	0	Carnivora	46722.0	0	Felidae	46722.0	0	Felis	46722.0	0	Felis catus	46722.0	0
scf7180000021144	79320	0.4397	0	50.8957	Eukaryota	15927.0	0	Chordata	15927.0	0	Carnivora	15927.0	0	Felidae	15927.0	0	Felis	9093.0	1	Felis catus	9093.0	1
scf7180000023393	31028	0.5148	0	203.291	Eukaryota	4562.0	0	Chordata	4562.0	0	Carnivora	4562.0	0	Felidae	4562.0	0	Felis	4290.0	1	Felis catus	4290.0	1
scf7180000020957	64367	0.3917	0	25.1142	Eukaryota	43653.0	0	Chordata	43653.0	0	Carnivora	43653.0	0	Felidae	43653.0	0	Felis	43653.0	0	Felis catus	43653.0	0
scf7180000022301	17967	0.4996	0	49.0738	Eukaryota	11843.0	0	Chordata	11843.0	0	Carnivora	11843.0	0	Felidae	11843.0	0	Felis	11843.0	0	Felis catus	11843.0	0
scf7180000018984	403956	0.4215	0	50.9832	Eukaryota	38709.0	0	Chordata	38709.0	0	Carnivora	38709.0	0	Felidae	38709.0	0	Felis	38709.0	0	Felis catus	38709.0	0
scf7180000019928	164527	0.3705	0	24.7938	Eukaryota	45874.0	0	Chordata	45874.0	0	Carnivora	45874.0	0	Felidae	45874.0	0	Felis	45874.0	0	Felis catus	45874.0	0
scf7180000018981	670599	0.3987	0	49.5501	Eukaryota	46183.0	0	Chordata	46183.0	0	Carnivora	46183.0	0	Herpestidae	27750.0	1	Suricata	27750.0	3	Suricata suricatta	27750.0	3
scf7180000018623	599175	0.4025	0	49.9476	Eukaryota	33328.0	0	Chordata	33328.0	0	Carnivora	33328.0	0	Felidae	33328.0	0	Felis	29350.0	1	Felis catus	29350.0	1
scf7180000018600	1194294	0.5322	100	49.9799	Eukaryota	47486.0	0	Chordata	47486.0	0	Carnivora	47486.0	0	Canidae	21953.0	3	Canis	12899.0	6	Canis lupus	12899.0	6
scf7180000022552	17998	0.3652	0	25.7219	Eukaryota	43693.0	0	Chordata	43693.0	0	Carnivora	43693.0	0	Felidae	25873.0	2	Panthera	12497.0	4	Suricata suricatta	10118.0	5
scf7180000021496	36888	0.38	0	29.1021	Eukaryota	48747.0	0	Chordata	48747.0	0	Carnivora	48747.0	0	Felidae	48747.0	0	Felis	43930.0	1	Felis catus	43930.0	1
scf7180000019634	328923	0.4511	0	52.4448	Eukaryota	50410.0	0	Chordata	50410.0	0	Carnivora	50410.0	0	Canidae	18797.0	4	Vulpes	14054.0	5	Vulpes vulpes	14054.0	5
scf7180000022281	17864	0.4016	0	24.2385	Eukaryota	33550.0	0	Chordata	33550.0	0	Carnivora	33550.0	0	Felidae	33550.0	0	Felis	33550.0	0	Felis catus	33550.0	0
scf7180000021331	76041	0.6671	0	47.9414	Eukaryota	15843.0	0	Chordata	15843.0	0	Carnivora	15843.0	0	Felidae	14191.0	1	Acinonyx	12589.0	2	Acinonyx jubatus	12589.0	2
scf7180000018709	600526	0.4029	0	49.2752	Eukaryota	105192.0	0	Chordata	105192.0	0	Carnivora	105192.0	0	Felidae	105192.0	0	Lynx	36700.0	3	Lynx canadensis	36700.0	3
scf7180000022279	14519	0.4721	0	46.9203	Eukaryota	1922.0	0	Chordata	1922.0	0	Carnivora	1735.0	1	Felidae	1735.0	1	Felis	1735.0	1	Felis catus	1735.0	1
scf7180000023060	41136	0.3831	0	356.8752	Eukaryota	7148.0	0	Chordata	7148.0	0	Carnivora	7148.0	0	Felidae	7148.0	0	Felis	7148.0	0	Felis catus	7148.0	0
scf7180000020953	97541	0.3959	0	26.0562	Eukaryota	18360.0	0	Chordata	18360.0	0	Carnivora	18360.0	0	Felidae	18360.0	0	Felis	16520.0	1	Felis catus	16520.0	1
scf7180000023624	19589	0.5976	0	115.6815	Eukaryota	2486.0	0	Chordata	2486.0	0	Carnivora	2486.0	0	Felidae	2486.0	0	Felis	1983.0	1	Felis catus	1983.0	1
scf7180000021100	79348	0.6637	0	49.5506	Eukaryota	17343.0	0	Chordata	17343.0	0	Carnivora	17343.0	0	Felidae	6798.0	3	Suricata	5847.0	6	Suricata suricatta	5847.0	6
scf7180000022227	12617	0.3583	0	23.3236	Eukaryota	39003.0	0	Chordata	39003.0	0	Carnivora	39003.0	0	Felidae	39003.0	0	Felis	34980.0	1	Felis catus	34980.0	1
scf7180000019702	284347	0.423	0	49.4551	Eukaryota	15991.0	0	Chordata	15991.0	0	Carnivora	15991.0	0	Felidae	15991.0	0	Felis	11835.0	2	Felis catus	11835.0	2
scf7180000022574	19246	0.5275	0	52.9818	Eukaryota	6799.0	0	Chordata	6799.0	0	Carnivora	6799.0	0	Felidae	4578.0	3	Lynx	4578.0	3	Lynx canadensis	4578.0	3
scf7180000020414	138303	0.3845	0	24.3984	Eukaryota	25830.0	0	Chordata	25830.0	0	Carnivora	25830.0	0	Felidae	25830.0	0	Felis	23272.0	1	Felis catus	23272.0	1
scf7180000018089	7463	0.4104	0	21.5229	Eukaryota	5728.0	0	Chordata	5728.0	0	Carnivora	5728.0	0	Felidae	5728.0	0	Felis	4578.0	2	Felis catus	4578.0	2
scf7180000022003	20837	0.4452	0	25.0502	Eukaryota	13104.0	0	Chordata	13104.0	0	Primates	8790.0	2	Hominidae	8790.0	3	Homo	5250.0	5	Homo sapiens	5250.0	5
scf7180000020952	67783	0.5307	0	48.2923	Eukaryota	28194.0	0	Chordata	28194.0	0	Carnivora	28194.0	0	Felidae	28194.0	0	Lynx	11196.0	3	Lynx canadensis	11196.0	3
scf7180000020027	165652	0.425	0	46.6534	Eukaryota	38176.0	0	Chordata	38176.0	0	Carnivora	38176.0	0	Felidae	38176.0	0	Felis	38176.0	0	Felis catus	38176.0	0
scf7180000022348	27720	0.442	0	54.986	Eukaryota	14171.0	0	Chordata	14171.0	0	Carnivora	14171.0	0	Felidae	14171.0	0	Felis	12712.0	1	Felis catus	12712.0	1
scf7180000023943	883197	0.3731	0	50.0739	Eukaryota	45324.0	0	Chordata	45324.0	0	Carnivora	45324.0	0	Felidae	45324.0	0	Felis	40821.0	1	Felis catus	40821.0	1
scf7180000023905	1021069	0.5031	0	52.9214	Eukaryota	24407.0	0	Chordata	24407.0	0	Carnivora	14248.0	2	Felidae	7475.0	4	Homo	7353.0	6	Homo sapiens	7353.0	6
scf7180000020174	1164711	0.4277	0	51.388	Eukaryota	44970.0	0	Chordata	44970.0	0	Carnivora	44970.0	0	Felidae	44970.0	0	Felis	40484.0	1	Felis catus	40484.0	1
scf7180000021506	47254	0.4134	0	24.6114	Eukaryota	11568.0	0	Chordata	11568.0	0	Carnivora	11568.0	0	Felidae	11568.0	0	Felis	10432.0	1	Felis catus	10432.0	1
scf7180000019340	292500	0.4209	0	50.5567	Eukaryota	9505.0	1	Chordata	9505.0	1	Chiroptera	4210.0	4	Cercopithecidae	1962.0	8	undef	1230.0	9	eukaryotic synthetic construct	1230.0	9
scf7180000024058	286728	0.4877	0	50.5766	Eukaryota	24093.0	0	Chordata	24093.0	0	Carnivora	24093.0	0	Felidae	24093.0	0	Felis	21644.0	1	Felis catus	21644.0	1
scf7180000021473	31045	0.4105	0	45.4854	Eukaryota	16389.0	0	Chordata	16389.0	0	Carnivora	16389.0	0	Felidae	16389.0	0	Felis	16389.0	0	Felis catus	16389.0	0
scf7180000017922	1993201	0.3784	0	62.0798	Eukaryota	47488.0	0	Chordata	47488.0	0	Carnivora	47488.0	0	Felidae	47488.0	0	Felis	47488.0	0	Felis catus	47488.0	0
scf7180000019278	311002	0.3544	0	47.8442	Eukaryota	35820.0	0	Chordata	35820.0	0	Carnivora	35820.0	0	Felidae	35820.0	0	Felis	35820.0	0	Felis catus	35820.0	0
scf7180000019583	385347	0.3938	0	51.8753	Eukaryota	46718.0	0	Chordata	46718.0	0	Carnivora	46718.0	0	Felidae	46718.0	0	Felis	46718.0	0	Felis catus	46718.0	0
scf7180000019069	720692	0.3595	0	49.6398	Eukaryota	41100.0	0	Chordata	41100.0	0	Carnivora	41100.0	0	Felidae	41100.0	0	Felis	41100.0	0	Felis catus	41100.0	0
scf7180000021835	40836	0.4171	0	25.0491	Eukaryota	13532.0	0	Chordata	13532.0	0	Carnivora	13532.0	0	Felidae	13532.0	0	Felis	12189.0	1	Felis catus	12189.0	1
scf7180000023437	11577	0.5222	0	131.3165	no-hit	0.0	0	no-hit	0.0	0	no-hit	0.0	0	no-hit	0.0	0	no-hit	0.0	0	no-hit	0.0	0
scf7180000022770	6448	0.3766	0	23.8938	Eukaryota	8029.0	0	Chordata	8029.0	0	Carnivora	8029.0	0	Felidae	8029.0	0	Felis	8029.0	0	Felis catus	8029.0	0
scf7180000019628	326318	0.5053	0	62.3608	Eukaryota	14295.0	0	Chordata	14295.0	0	Carnivora	14295.0	0	Felidae	14295.0	0	Felis	14295.0	0	Felis catus	14295.0	0
scf7180000021559	66474	0.3572	0	24.8972	Eukaryota	15363.0	0	Chordata	15363.0	0	Carnivora	15363.0	0	Felidae	15363.0	0	Felis	12257.0	1	Felis catus	12257.0	1
scf7180000020120	153279	0.3785	0	24.2178	Eukaryota	37883.0	0	Chordata	37883.0	0	Carnivora	37883.0	0	Felidae	37883.0	0	Felis	37883.0	0	Felis catus	37883.0	0
scf7180000021297	44480	0.3897	0	24.7219	Eukaryota	44395.0	0	Chordata	44395.0	0	Carnivora	44395.0	0	Felidae	44395.0	0	Felis	44395.0	0	Felis catus	44395.0	0
scf7180000017539	1259026	0.3616	0	49.1649	Eukaryota	46264.0	0	Chordata	46264.0	0	Carnivora	46264.0	0	Felidae	46264.0	0	Felis	46264.0	0	Felis catus	46264.0	0
scf7180000020243	142752	0.4252	0	25.2158	Eukaryota	14697.0	0	Chordata	14697.0	0	Carnivora	14697.0	0	Felidae	14697.0	0	Felis	14697.0	0	Felis catus	14697.0	0
scf7180000021033	53784	0.4193	0	27.0395	Eukaryota	11485.0	0	Chordata	11485.0	0	Carnivora	11485.0	0	Felidae	11485.0	0	Felis	9190.0	1	Felis catus	9190.0	1
scf7180000021941	21502	0.3655	0	48.1251	Eukaryota	17697.0	0	Chordata	17697.0	0	Carnivora	17697.0	0	Felidae	17697.0	0	Felis	17697.0	0	Felis catus	17697.0	0
scf7180000023267	37141	0.4138	0	485.5319	Eukaryota	4585.0	0	Chordata	4585.0	0	Carnivora	4585.0	0	Felidae	4585.0	0	Felis	3694.0	1	Felis catus	3694.0	1
scf7180000022478	9969	0.3832	0	25.646	Eukaryota	29543.0	0	Chordata	29543.0	0	Carnivora	26881.0	1	Felidae	14497.0	3	Felis	6237.0	6	Felis catus	6237.0	6
scf7180000018919	63690	0.6122	0	49.6335	Eukaryota	6107.0	0	Chordata	6107.0	0	Carnivora	6107.0	0	Felidae	4277.0	1	Suricata	1830.0	5	Suricata suricatta	1830.0	5
scf7180000020397	137076	0.4659	0	48.1846	Eukaryota	39732.0	0	Chordata	39732.0	0	Carnivora	39732.0	0	Felidae	39732.0	0	Felis	35730.0	1	Felis catus	35730.0	1
scf7180000021420	46948	0.365	0	24.387	Eukaryota	21156.0	0	Chordata	21156.0	0	Carnivora	21156.0	0	Felidae	21156.0	0	Felis	19039.0	1	Felis catus	19039.0	1
scf7180000023191	35287	0.4174	0	196.959	Eukaryota	27132.0	0	Chordata	27132.0	0	Carnivora	27132.0	0	Felidae	27132.0	0	Felis	24374.0	1	Felis catus	24374.0	1
scf7180000021619	36491	0.4572	0	24.0471	Eukaryota	40492.0	0	Chordata	40492.0	0	Carnivora	13017.0	4	Otariidae	8562.0	6	Pteropus	7936.0	7	Neomonachus schauinslandi	4455.0	9
scf7180000020130	170169	0.3532	0	47.9151	Eukaryota	31820.0	0	Chordata	31820.0	0	Carnivora	31820.0	0	Felidae	31820.0	0	Felis	28628.0	1	Felis catus	28628.0	1
scf7180000024189	117547	0.3708	0	25.1936	Eukaryota	17528.0	0	Chordata	17528.0	0	Carnivora	17528.0	0	Felidae	17528.0	0	Felis	15762.0	1	Felis catus	15762.0	1
scf7180000023690	21237	0.4074	0	196.4	Eukaryota	6041.0	0	Chordata	6041.0	0	Carnivora	6041.0	0	Felidae	5246.0	1	Felis	5246.0	1	Felis catus	5246.0	1
scf7180000023698	1241007	0.4514	0	79.2593	Eukaryota	64587.0	0	Chordata	64587.0	0	Carnivora	64587.0	0	Felidae	64587.0	0	Panthera	45252.0	1	Panthera pardus	25848.0	2
scf7180000020580	128314	0.4686	0	25.4134	Eukaryota	14373.0	0	Chordata	14373.0	0	Carnivora	14373.0	0	Felidae	14373.0	0	Felis	12877.0	1	Felis catus	12877.0	1
scf7180000018036	273511	0.4876	0	77.1676	Eukaryota	41995.0	0	Chordata	41995.0	0	Carnivora	41995.0	0	Felidae	41995.0	0	Lynx	24616.0	2	Lynx canadensis	24616.0	3
scf7180000018927	175987	0.4189	0	51.9572	Eukaryota	8464.0	1	Chordata	8464.0	1	Carnivora	6509.0	2	Felidae	6509.0	3	Felis	6509.0	3	Felis catus	6509.0	3
scf7180000019318	329398	0.3713	0	50.5178	Eukaryota	47600.0	0	Chordata	47600.0	0	Carnivora	47600.0	0	Felidae	47600.0	0	Felis	47600.0	0	Felis catus	47600.0	0
scf7180000022859	38693	0.4388	0	170.7528	Eukaryota	5566.0	0	Chordata	5566.0	0	Artiodactyla	5566.0	0	Bovidae	5566.0	0	Ovis	5566.0	0	Ovis canadensis	5566.0	0
scf7180000018298	2783327	0.4479	0	51.4652	Eukaryota	45890.0	0	Chordata	45890.0	0	Carnivora	45890.0	0	Felidae	45890.0	0	Acinonyx	26094.0	3	Acinonyx jubatus	26094.0	3
scf7180000017517	393032	0.3761	0	49.7555	Eukaryota	45047.0	0	Chordata	45047.0	0	Carnivora	45047.0	0	Felidae	45047.0	0	Felis	45047.0	0	Felis catus	45047.0	0
scf7180000020435	98459	0.3786	0	24.8116	Eukaryota	25735.0	0	Chordata	25735.0	0	Primates	16674.0	2	Hominidae	16674.0	3	Homo	10014.0	4	Homo sapiens	10014.0	4
scf7180000019332	387799	0.4202	0	50.8191	Eukaryota	26729.0	0	Chordata	26729.0	0	Carnivora	26729.0	0	Felidae	26729.0	0	Acinonyx	8097.0	4	Acinonyx jubatus	8097.0	4
scf7180000018101	25304	0.4317	0	24.7898	Eukaryota	69432.0	0	Chordata	69432.0	0	Carnivora	69432.0	0	Felidae	69432.0	0	Felis	41700.0	1	Felis catus	41700.0	1
scf7180000018044	1330552	0.4113	0	50.6845	Eukaryota	46198.0	0	Chordata	46198.0	0	Carnivora	46198.0	0	Felidae	46198.0	0	Felis	46198.0	0	Felis catus	46198.0	0
scf7180000018151	942215	0.3707	0	50.4636	Eukaryota	51840.0	0	Chordata	51840.0	0	Carnivora	51840.0	0	Felidae	51840.0	0	Felis	46106.0	1	Felis catus	46106.0	1
scf7180000023751	38706	0.3779	0	417.4957	Eukaryota	7262.0	0	Chordata	7262.0	0	Carnivora	7262.0	0	Felidae	7262.0	0	Felis	7262.0	0	Felis catus	7262.0	0
scf7180000019862	307836	0.4261	0	51.3151	Eukaryota	16614.0	0	Chordata	16614.0	0	Carnivora	16614.0	0	Felidae	16614.0	0	Felis	14922.0	1	Felis catus	14922.0	1
scf7180000019193	418308	0.477	0	55.2864	Eukaryota	25323.0	0	Chordata	25323.0	0	Carnivora	25323.0	0	Felidae	25323.0	0	Felis	11028.0	3	Felis catus	11028.0	3
scf7180000018948	614785	0.3785	0	50.6202	Eukaryota	44905.0	0	Chordata	44905.0	0	Carnivora	44905.0	0	Felidae	44905.0	0	Felis	44905.0	0	Felis catus	44905.0	0
scf7180000018071	24260	0.375	0	29.3865	Eukaryota	45781.0	0	Chordata	45781.0	0	Carnivora	45781.0	0	Felidae	45781.0	0	Felis	45781.0	0	Felis catus	45781.0	0
scf7180000023861	388900	0.4868	0	50.1925	Eukaryota	41778.0	0	Chordata	41778.0	0	Carnivora	41778.0	0	Felidae	41778.0	0	Felis	37624.0	1	Felis catus	37624.0	1
scf7180000018855	57358	0.3938	0	24.66	Eukaryota	15104.0	0	Chordata	15104.0	0	Carnivora	15104.0	0	Felidae	15104.0	0	Felis	10550.0	1	Felis catus	10550.0	1
scf7180000021241	32837	0.6355	0	51.5352	Eukaryota	9718.0	0	Chordata	9718.0	0	Carnivora	9718.0	0	Felidae	9718.0	0	Lynx	4864.0	1	Lynx canadensis	4864.0	1
scf7180000021391	8633	0.5568	0	39.4768	Eukaryota	3364.0	0	Chordata	3364.0	0	Carnivora	3364.0	0	Felidae	3364.0	0	Felis	3064.0	1	Felis catus	3064.0	1
scf7180000020569	109553	0.49	0	45.5897	Eukaryota	21560.0	0	Chordata	21560.0	0	Carnivora	21560.0	0	Felidae	21560.0	0	Lynx	17288.0	1	Lynx canadensis	17288.0	1
scf7180000018846	504009	0.4661	0	48.9004	Eukaryota	47404.0	0	Chordata	47404.0	0	Carnivora	47404.0	0	Otariidae	37202.0	1	Eumetopias	18556.0	3	Eumetopias jubatus	18556.0	3
scf7180000018004	1237767	0.5336	0	50.5521	Eukaryota	23037.0	0	Chordata	23037.0	0	Carnivora	23037.0	0	Felidae	19295.0	1	Panthera	11539.0	5	Panthera pardus	7597.0	7
scf7180000020750	63692	0.4524	0	23.216	Eukaryota	35570.0	0	Chordata	35570.0	0	Carnivora	35570.0	0	Felidae	35570.0	0	Lynx	19465.0	1	Lynx canadensis	19465.0	1
scf7180000020486	58460	0.3681	0	26.8094	Eukaryota	45582.0	0	Chordata	45582.0	0	Carnivora	45582.0	0	Felidae	45582.0	0	Felis	45582.0	0	Felis catus	45582.0	0
scf7180000018068	263063	0.426	0	49.8112	Eukaryota	45315.0	0	Chordata	45315.0	0	Carnivora	45315.0	0	Felidae	45315.0	0	Felis	45315.0	0	Felis catus	45315.0	0
scf7180000018170	881460	0.4842	0	50.3565	Eukaryota	32152.0	0	Chordata	32152.0	0	Carnivora	32152.0	0	Felidae	32152.0	0	Felis	28879.0	1	Felis catus	28879.0	1
scf7180000018809	328649	0.4258	0	78.1981	Eukaryota	45290.0	0	Chordata	45290.0	0	Carnivora	45290.0	0	Felidae	45290.0	0	Felis	45290.0	0	Felis catus	45290.0	0
scf7180000021984	22676	0.419	0	27.8593	Eukaryota	5134.0	0	Chordata	5134.0	0	Carnivora	5134.0	0	Felidae	5134.0	0	Felis	4716.0	1	Felis catus	4716.0	1
scf7180000019026	441933	0.526	0	52.672	Eukaryota	11089.0	0	Chordata	11089.0	0	Carnivora	11089.0	0	Felidae	6351.0	2	Suricata	3853.0	6	Suricata suricatta	3853.0	6
scf7180000018227	949157	0.3751	0	49.7074	Eukaryota	47227.0	0	Chordata	47227.0	0	Carnivora	47227.0	0	Felidae	47227.0	0	Felis	47227.0	0	Felis catus	47227.0	0
scf7180000020374	90070	0.6237	0	47.9607	Eukaryota	12515.0	0	Chordata	12515.0	0	Carnivora	4524.0	2	Delphinidae	3729.0	4	Homo	3471.0	5	Homo sapiens	3471.0	5
scf7180000021816	51592	0.4578	0	25.4108	Eukaryota	66840.0	0	Chordata	66840.0	0	Carnivora	56370.0	1	Felidae	51160.0	2	Acinonyx	27456.0	5	Acinonyx jubatus	27456.0	5
scf7180000019224	348427	0.4221	0	50.8047	Eukaryota	77556.0	0	Chordata	77556.0	0	Carnivora	77556.0	0	Felidae	77556.0	0	Panthera	77556.0	0	Panthera pardus	69811.0	1
scf7180000020303	273767	0.4099	0	30.0029	Eukaryota	37106.0	0	Chordata	37106.0	0	Carnivora	37106.0	0	Felidae	37106.0	0	Felis	37106.0	0	Felis catus	37106.0	0
scf7180000018685	643493	0.3774	0	51.0513	Eukaryota	40665.0	0	Chordata	40665.0	0	Carnivora	40665.0	0	Felidae	24779.0	2	Panthera	24779.0	2	Panthera pardus	20683.0	3
scf7180000019362	364588	0.4304	0	51.6241	Eukaryota	17355.0	0	Chordata	17355.0	0	Carnivora	17355.0	0	Felidae	15644.0	1	Felis	13882.0	2	Felis catus	13882.0	2
scf7180000021644	52492	0.3648	0	24.8384	Eukaryota	14382.0	0	Chordata	14382.0	0	Carnivora	14382.0	0	Felidae	14382.0	0	Felis	14382.0	0	Felis catus	14382.0	0
scf7180000023831	1258344	0.4892	0	51.207	Eukaryota	23838.0	1	Chordata	23838.0	1	Artiodactyla	19709.0	3	Bovidae	19709.0	3	Ovis	19709.0	3	Ovis canadensis	19709.0	3
scf7180000019321	614852	0.6126	0	52.4772	Eukaryota	30602.0	0	Chordata	30602.0	0	Carnivora	30602.0	0	Felidae	30602.0	0	Acinonyx	21476.0	1	Acinonyx jubatus	21476.0	1
scf7180000018018	17350	0.527	0	584.7211	Eukaryota	1818.0	0	Chordata	1818.0	0	Carnivora	1818.0	0	Felidae	1818.0	0	Felis	1818.0	0	Felis catus	1818.0	0
scf7180000021146	43792	0.4384	0	24.4377	Eukaryota	16034.0	0	Chordata	16034.0	0	Carnivora	16034.0	0	Felidae	16034.0	0	Felis	16034.0	0	Felis catus	16034.0	0
scf7180000018561	592305	0.417	0	50.501	Eukaryota	36215.0	0	Chordata	36215.0	0	Carnivora	36215.0	0	Felidae	19972.0	2	Acinonyx	10027.0	4	Acinonyx jubatus	10027.0	5
scf7180000020162	105710	0.53	0	48.3569	Eukaryota	12708.0	0	Chordata	12708.0	0	Carnivora	5469.0	2	Hominidae	4784.0	4	Homo	3576.0	7	Homo sapiens	3576.0	7
scf7180000018527	667898	0.3935	0	51.0469	Eukaryota	103352.0	0	Chordata	103352.0	0	Carnivora	103352.0	0	Felidae	61956.0	1	Felis	61956.0	1	Felis catus	61956.0	1
scf7180000023456	123997	0.3576	0	630.1741	Eukaryota	43560.0	0	Chordata	43560.0	0	Carnivora	43560.0	0	Felidae	43560.0	0	Felis	39188.0	1	Felis catus	39188.0	1
scf7180000020061	706707	0.3944	100	52.2431	Eukaryota	47130.0	0	Chordata	47130.0	0	Carnivora	47130.0	0	Felidae	47130.0	0	Felis	47130.0	0	Felis catus	47130.0	0
scf7180000023819	2405975	0.4344	0	50.8595	Eukaryota	87691.0	0	Chordata	87691.0	0	Carnivora	87691.0	0	Felidae	87691.0	0	Panthera	26439.0	3	Panthera pardus	26439.0	3
scf7180000023786	1494169	0.3541	0	48.5629	Eukaryota	48152.0	0	Chordata	48152.0	0	Carnivora	48152.0	0	Felidae	48152.0	0	Felis	48152.0	0	Felis catus	48152.0	0
scf7180000022823	62200	0.4421	0	88.7548	Eukaryota	42292.0	0	Chordata	42292.0	0	Carnivora	42292.0	0	Felidae	42292.0	0	Felis	42292.0	0	Felis catus	42292.0	0
scf7180000018204	955527	0.4526	0	50.6004	Eukaryota	53607.0	0	Chordata	53607.0	0	Carnivora	53607.0	0	Felidae	33082.0	1	Felis	33082.0	3	Felis catus	33082.0	3
scf7180000024081	142864	0.3809	0	48.8883	Eukaryota	25619.0	0	Chordata	25619.0	0	Carnivora	25619.0	0	Felidae	25619.0	0	Felis	23018.0	1	Felis catus	23018.0	1
scf7180000022423	10249	0.4993	0	26.5633	Eukaryota	9458.0	0	Chordata	9458.0	0	Primates	5574.0	3	Hominidae	5574.0	3	Homo	4185.0	4	Homo sapiens	4185.0	4
scf7180000022660	6721	0.6341	0	42.6611	Eukaryota	2447.0	0	Chordata	2447.0	0	Carnivora	2447.0	0	Felidae	2447.0	0	Felis	1475.0	2	Felis catus	1475.0	3
scf7180000024150	102728	0.5096	0	48.6138	Eukaryota	8516.0	0	Chordata	8516.0	0	Carnivora	8516.0	0	Felidae	8516.0	0	Felis	8516.0	0	Felis catus	8516.0	0
scf7180000017718	1711656	0.4263	0	51.81	Eukaryota	46130.0	0	Chordata	46130.0	0	Carnivora	46130.0	0	Felidae	46130.0	0	Felis	46130.0	0	Felis catus	46130.0	0
scf7180000022183	21220	0.4366	0	26.3359	Eukaryota	3850.0	0	Chordata	3850.0	0	Carnivora	1495.0	3	Hominidae	1350.0	4	Felis	1001.0	6	Felis catus	1001.0	6
scf7180000023680	82468	0.3856	0	396.5678	Eukaryota	12367.0	0	Chordata	12367.0	0	Carnivora	12367.0	0	Felidae	12367.0	0	Felis	7458.0	1	Felis catus	7458.0	1
scf7180000022235	13579	0.3589	0	20.5595	Eukaryota	28429.0	0	Chordata	28429.0	0	Carnivora	28429.0	0	Felidae	28429.0	0	Felis	25627.0	1	Felis catus	25627.0	1
scf7180000018158	1278198	0.4058	0	51.9172	Eukaryota	55658.0	0	Chordata	55658.0	0	Carnivora	55658.0	0	Felidae	55658.0	0	Acinonyx	44504.0	2	Acinonyx jubatus	44504.0	2
scf7180000023885	1041764	0.4559	0	52.0323	Eukaryota	58930.0	0	Chordata	58930.0	0	Carnivora	58930.0	0	Felidae	34530.0	1	Felis	34530.0	1	Felis catus	34530.0	1
scf7180000020660	90524	0.4844	0	26.6023	Eukaryota	24876.0	0	Chordata	24876.0	0	Carnivora	24876.0	0	Felidae	24876.0	0	Felis	22368.0	1	Felis catus	22368.0	1
scf7180000022840	24385	0.4574	0	479.9629	no-hit	0.0	0	no-hit	0.0	0	no-hit	0.0	0	no-hit	0.0	0	no-hit	0.0	0	no-hit	0.0	0
scf7180000024168	154611	0.3725	0	25.4795	Eukaryota	20639.0	0	Chordata	20639.0	0	Carnivora	20639.0	0	Felidae	20639.0	0	Felis	16455.0	1	Felis catus	16455.0	1
scf7180000022659	5478	0.4356	0	204.8471	Eukaryota	2156.0	0	Chordata	2156.0	0	Carnivora	2156.0	0	Felidae	2156.0	0	Felis	1317.0	2	Felis catus	1317.0	3
scf7180000019386	291264	0.4258	0	49.4516	Eukaryota	9085.0	0	Chordata	9085.0	0	Carnivora	9085.0	0	Felidae	9085.0	0	Felis	8202.0	1	Felis catus	8202.0	1
scf7180000020882	74089	0.34	0	49.1143	Eukaryota	5711.0	1	Chordata	5711.0	1	Carnivora	1865.0	4	Bovidae	1836.0	5	Felis	1519.0	6	Felis catus	1519.0	6
scf7180000019092	61183	0.4277	0	55.2432	Eukaryota	32570.0	0	Chordata	32570.0	0	Carnivora	32570.0	0	Felidae	32570.0	0	Felis	29340.0	1	Felis catus	29340.0	1
scf7180000022448	19407	0.405	0	24.575	Eukaryota	44885.0	0	Chordata	44885.0	0	Carnivora	44885.0	0	Felidae	44885.0	0	Felis	44885.0	0	Felis catus	44885.0	0
scf7180000022341	20369	0.4038	0	23.6999	Eukaryota	40288.0	0	Chordata	40288.0	0	Carnivora	40288.0	0	Felidae	40288.0	0	Felis	40288.0	0	Felis catus	40288.0	0
scf7180000019878	155019	0.4631	0	52.1948	Eukaryota	19464.0	0	Chordata	19464.0	0	Carnivora	19464.0	0	Felidae	19464.0	0	Felis	17454.0	1	Felis catus	17454.0	1
scf7180000024159	114245	0.441	0	26.3777	Eukaryota	31697.0	0	Chordata	31697.0	0	Carnivora	28945.0	1	Felidae	18184.0	5	Panthera	7229.0	8	Suricata suricatta	3788.0	9
scf7180000020011	208976	0.5337	0	53.5532	Eukaryota	33977.0	0	Chordata	33977.0	0	Carnivora	33977.0	0	Felidae	10659.0	5	Panthera	3565.0	9	Panthera pardus	3565.0	9
scf7180000018035	44205	0.4561	0	37.2604	Eukaryota	7283.0	1	Chordata	7283.0	1	Carnivora	6214.0	3	Felidae	6214.0	3	Felis	6214.0	3	Felis catus	6214.0	3
scf7180000020733	168470	0.4331	0	54.0007	Eukaryota	37721.0	0	Chordata	37721.0	0	Carnivora	37721.0	0	Felidae	31651.0	2	Puma	11876.0	6	Puma concolor	11876.0	7
scf7180000022521	20637	0.4272	0	24.3396	Eukaryota	3525.0	0	Chordata	3183.0	1	Primates	2493.0	2	Hominidae	2493.0	2	Homo	2084.0	3	Homo sapiens	2084.0	3
scf7180000021212	52848	0.3872	0	24.9356	Eukaryota	20939.0	0	Chordata	20939.0	0	Carnivora	20939.0	0	Felidae	12809.0	2	Panthera	4274.0	6	Lynx canadensis	4248.0	7
scf7180000020223	107149	0.4029	0	44.8456	Eukaryota	25123.0	0	Chordata	25123.0	0	Carnivora	25123.0	0	Felidae	25123.0	0	Felis	22565.0	1	Felis catus	22565.0	1
scf7180000022409	14100	0.37	0	25.6274	Eukaryota	6454.0	0	Chordata	6454.0	0	Carnivora	4406.0	1	Felidae	4406.0	1	Felis	3851.0	2	Felis catus	3851.0	2
scf7180000021899	25482	0.4641	0	51.0933	Eukaryota	28891.0	0	Chordata	28891.0	0	Carnivora	28891.0	0	Felidae	28891.0	0	Felis	28891.0	0	Felis catus	28891.0	0
scf7180000018064	2135801	0.4205	0	51.6553	Eukaryota	59298.0	0	Chordata	59298.0	0	Carnivora	44780.0	1	Felidae	44780.0	2	Felis	26238.0	3	Felis catus	26238.0	3
scf7180000021058	178893	0.6064	0	49.0683	Eukaryota	18613.0	0	Chordata	18613.0	0	Carnivora	14077.0	1	Felidae	7099.0	4	Homo	4536.0	7	Homo sapiens	4536.0	8
scf7180000022714	25554	0.4025	0	25.8306	Eukaryota	23282.0	0	Chordata	23282.0	0	Carnivora	23282.0	0	Felidae	23282.0	0	Felis	16324.0	1	Felis catus	16324.0	1
scf7180000022371	7494	0.4029	0	28.0556	Eukaryota	10559.0	0	Chordata	10559.0	0	Carnivora	9517.0	1	Felidae	9517.0	2	Felis	9517.0	2	Felis catus	9517.0	2
scf7180000020320	219670	0.5769	0	48.8972	Eukaryota	10557.0	0	Chordata	10557.0	0	Carnivora	10557.0	0	Felidae	6139.0	4	Felis	2830.0	7	Felis catus	2830.0	8
scf7180000018746	672661	0.394	0	51.3784	Eukaryota	57804.0	0	Chordata	57804.0	0	Carnivora	57804.0	0	Felidae	57804.0	0	Felis	57804.0	0	Felis catus	57804.0	0
scf7180000019186	667083	0.3905	0	49.71	Eukaryota	45560.0	0	Chordata	45560.0	0	Carnivora	45560.0	0	Felidae	45560.0	0	Felis	45560.0	0	Felis catus	45560.0	0
scf7180000019891	166370	0.3831	0	25.594	Eukaryota	42903.0	0	Chordata	42903.0	0	Carnivora	42903.0	0	Felidae	37903.0	1	Felis	37903.0	1	Felis catus	37903.0	1
scf7180000021101	2388	0.3882	0	24.4077	Eukaryota	2198.0	0	Chordata	2198.0	0	Carnivora	2198.0	0	Felidae	1959.0	1	Felis	1519.0	3	Felis catus	1519.0	3
scf7180000021771	26872	0.3749	0	24.2689	Eukaryota	44266.0	0	Chordata	44266.0	0	Carnivora	44266.0	0	Felidae	44266.0	0	Felis	44266.0	0	Felis catus	44266.0	0
scf7180000023663	64175	0.3853	0	294.4416	Eukaryota	7127.0	0	Chordata	7127.0	0	Carnivora	7127.0	0	Felidae	7127.0	0	Felis	7127.0	0	Felis catus	7127.0	0
scf7180000023040	23186	0.3996	0	314.8848	Eukaryota	10163.0	0	Chordata	10163.0	0	Apterygiformes	9093.0	1	Apterygidae	9093.0	1	Apteryx	9093.0	1	Apteryx mantelli	9093.0	1
scf7180000018564	724430	0.3431	0	48.1411	Eukaryota	45211.0	0	Chordata	45211.0	0	Carnivora	45211.0	0	Felidae	45211.0	0	Felis	45211.0	0	Felis catus	45211.0	0
scf7180000022726	5425	0.3504	0	23.6092	Eukaryota	16371.0	0	Chordata	16371.0	0	Carnivora	16371.0	0	Felidae	16371.0	0	Felis	13117.0	1	Felis catus	13117.0	1
scf7180000019353	296864	0.5372	0	54.8674	Eukaryota	39228.0	0	Chordata	39228.0	0	Carnivora	39228.0	0	Felidae	39228.0	0	Felis	35348.0	1	Felis catus	35348.0	1
scf7180000018387	878651	0.4086	0	48.2331	Eukaryota	48048.0	0	Chordata	48048.0	0	Carnivora	48048.0	0	Felidae	48048.0	0	Felis	48048.0	0	Felis catus	48048.0	0
scf7180000020635	94935	0.5379	0	50.1629	Eukaryota	8268.0	0	Chordata	8268.0	0	Carnivora	8268.0	0	Felidae	8268.0	0	Felis	6623.0	1	Felis catus	6623.0	1
scf7180000024017	354819	0.5024	0	52.613	Eukaryota	34857.0	0	Chordata	34857.0	0	Carnivora	26946.0	1	Felidae	17304.0	4	Panthera	6913.0	7	Suricata suricatta	6820.0	8
scf7180000020794	102697	0.568	0	49.1273	Eukaryota	5945.0	1	Chordata	5945.0	1	Primates	2811.0	5	Hominidae	1419.0	6	Homo	1419.0	8	Homo sapiens	1419.0	8
scf7180000019046	73754	0.4515	0	47.8072	Eukaryota	6296.0	0	Chordata	6296.0	0	Carnivora	6296.0	0	Felidae	5727.0	1	Acinonyx	1900.0	5	Acinonyx jubatus	1900.0	5
scf7180000021333	64510	0.3639	0	24.7574	Eukaryota	40951.0	0	Chordata	40951.0	0	Carnivora	40951.0	0	Felidae	40951.0	0	Felis	36816.0	1	Felis catus	36816.0	1
scf7180000019068	106454	0.3823	0	52.3165	Eukaryota	38797.0	0	Chordata	38797.0	0	Carnivora	38797.0	0	Felidae	38797.0	0	Felis	38797.0	0	Felis catus	38797.0	0
scf7180000021747	28774	0.391	0	24.6646	Eukaryota	21501.0	0	Chordata	21501.0	0	Carnivora	21501.0	0	Felidae	21501.0	0	Felis	19384.0	1	Felis catus	19384.0	1
scf7180000020115	163963	0.4379	0	26.7342	Eukaryota	37680.0	0	Chordata	37680.0	0	Carnivora	37680.0	0	Felidae	37680.0	0	Felis	37680.0	0	Felis catus	37680.0	0
scf7180000018234	288630	0.443	0	51.6059	Eukaryota	45333.0	0	Chordata	45333.0	0	Carnivora	45333.0	0	Felidae	45333.0	0	Felis	45333.0	0	Felis catus	45333.0	0
scf7180000019742	248255	0.3871	0	50.2043	Eukaryota	36326.0	0	Chordata	36326.0	0	Carnivora	36326.0	0	Felidae	36326.0	0	Felis	24350.0	2	Felis catus	24350.0	2
scf7180000018817	47906	0.3888	0	26.2526	Eukaryota	30839.0	0	Chordata	30839.0	0	Carnivora	30839.0	0	Felidae	30839.0	0	Felis	30839.0	0	Felis catus	30839.0	0
scf7180000023960	1446515	0.4479	0	52.5921	Eukaryota	42277.0	0	Chordata	42277.0	0	Carnivora	42277.0	0	Felidae	42277.0	0	Felis	42277.0	0	Felis catus	42277.0	0
scf7180000021870	26839	0.4289	0	24.6123	Eukaryota	5027.0	0	Chordata	5027.0	0	Carnivora	4021.0	1	Felidae	4021.0	1	Felis	4021.0	2	Felis catus	4021.0	2
scf7180000020730	76684	0.5458	0	46.1177	Eukaryota	30771.0	0	Chordata	30771.0	0	Carnivora	30771.0	0	Felidae	15242.0	2	Eumetopias	12155.0	4	Eumetopias jubatus	12155.0	4
scf7180000020127	172160	0.4622	0	50.403	Eukaryota	46402.0	0	Chordata	46402.0	0	Carnivora	46402.0	0	Otariidae	17938.0	5	Zalophus	8980.0	8	Zalophus californianus	8980.0	8
scf7180000021430	47057	0.6212	0	47.6013	Eukaryota	8460.0	0	Chordata	8460.0	0	Carnivora	8460.0	0	Felidae	7588.0	1	Panthera	2577.0	4	Lynx canadensis	2512.0	5
scf7180000023856	1075279	0.4468	0	49.9878	Eukaryota	39825.0	1	Chordata	39825.0	1	Carnivora	35080.0	2	Felidae	35080.0	2	Felis	35080.0	2	Felis catus	35080.0	2
scf7180000021844	24272	0.5231	0	44.5754	Eukaryota	3206.0	1	Chordata	3206.0	1	Carnivora	2823.0	2	Felidae	2823.0	2	Felis	2823.0	2	Felis catus	2823.0	2
scf7180000022212	17677	0.3614	0	21.8207	Eukaryota	38640.0	0	Chordata	38640.0	0	Carnivora	38640.0	0	Felidae	38640.0	0	Felis	34734.0	1	Felis catus	34734.0	1
scf7180000022361	24802	0.3753	0	332.0037	Eukaryota	6530.0	0	Chordata	6530.0	0	Carnivora	6530.0	0	Felidae	6530.0	0	Felis	6530.0	0	Felis catus	6530.0	0
scf7180000018543	780209	0.3954	0	50.0925	Eukaryota	46205.0	0	Chordata	46205.0	0	Carnivora	46205.0	0	Felidae	46205.0	0	Felis	46205.0	0	Felis catus	46205.0	0
scf7180000018312	948950	0.5211	0	57.9553	Eukaryota	44410.0	0	Chordata	44410.0	0	Carnivora	44410.0	0	Felidae	22257.0	1	Suricata	22153.0	2	Suricata suricatta	22153.0	2
scf7180000018263	56685	0.391	0	24.8851	Eukaryota	18827.0	0	Chordata	18827.0	0	Carnivora	18827.0	0	Felidae	18827.0	0	Felis	16924.0	1	Felis catus	16924.0	1
scf7180000022846	38963	0.415	0	145.025	Eukaryota	17056.0	0	Chordata	17056.0	0	Carnivora	17056.0	0	Felidae	17056.0	0	Felis	13684.0	1	Felis catus	13684.0	1
scf7180000022401	15728	0.3843	0	25.28	Eukaryota	6748.0	0	Chordata	6748.0	0	Carnivora	3103.0	2	Felidae	2655.0	3	Homo	2254.0	4	Homo sapiens	2254.0	4
scf7180000018736	719089	0.3966	0	51.0994	Eukaryota	47015.0	0	Chordata	47015.0	0	Carnivora	47015.0	0	Felidae	47015.0	0	Felis	47015.0	0	Felis catus	47015.0	0
scf7180000022274	13315	0.3976	0	46.3953	Eukaryota	4543.0	0	Chordata	4543.0	0	Carnivora	3541.0	1	Canidae	2642.0	2	Canis	2642.0	2	Canis lupus	2642.0	2
scf7180000021720	27501	0.4277	0	146.729	Eukaryota	2197.0	0	Chordata	2197.0	0	Carnivora	2197.0	0	Felidae	2197.0	0	Felis	1548.0	1	Felis catus	1548.0	1
scf7180000018132	1124916	0.3844	0	49.9933	Eukaryota	46712.0	0	Chordata	46712.0	0	Carnivora	46712.0	0	Felidae	46712.0	0	Felis	46712.0	0	Felis catus	46712.0	0
scf7180000022399	10733	0.3916	0	25.2501	Eukaryota	3523.0	0	Chordata	3523.0	0	Primates	2010.0	3	Hominidae	2010.0	3	Homo	1503.0	5	Homo sapiens	1503.0	5
scf7180000019569	226609	0.5166	0	52.3175	Eukaryota	31946.0	0	Chordata	31946.0	0	Carnivora	18964.0	1	Felidae	13156.0	3	Lagenorhynchus	6532.0	5	Lagenorhynchus obliquidens	6532.0	5
scf7180000023112	37319	0.4428	0	179.9841	Eukaryota	7435.0	0	Chordata	7435.0	0	Carnivora	7435.0	0	Felidae	7435.0	0	Felis	7435.0	0	Felis catus	7435.0	0
scf7180000022102	17454	0.3789	0	22.9716	Eukaryota	7347.0	0	Chordata	7347.0	0	Carnivora	5889.0	1	Felidae	5889.0	1	Felis	5889.0	1	Felis catus	5889.0	1
scf7180000023232	26360	0.4388	0	237.9438	Eukaryota	4357.0	0	Chordata	4357.0	0	Carnivora	4357.0	0	Felidae	2708.0	1	Felis	2138.0	2	Felis catus	2138.0	2
scf7180000021185	60292	0.3765	0	23.9464	Eukaryota	39388.0	0	Chordata	39388.0	0	Carnivora	39388.0	0	Felidae	39388.0	0	Felis	39388.0	0	Felis catus	39388.0	0
scf7180000023652	42207	0.3931	0	280.1737	Eukaryota	11829.0	0	Chordata	11829.0	0	Carnivora	11829.0	0	Felidae	11829.0	0	Felis	11829.0	0	Felis catus	11829.0	0
scf7180000022232	16733	0.5478	0	39.6324	Eukaryota	2774.0	0	Chordata	2774.0	0	Carnivora	2774.0	0	Felidae	2774.0	0	Felis	2216.0	1	Felis catus	2216.0	1
scf7180000021553	40024	0.5431	0	47.9857	Eukaryota	8693.0	0	Chordata	8693.0	0	Carnivora	5953.0	2	Felidae	5164.0	3	Homo	1836.0	6	Homo sapiens	1836.0	6
scf7180000023494	17850	0.4899	0	85.8406	no-hit	0.0	0	no-hit	0.0	0	no-hit	0.0	0	no-hit	0.0	0	no-hit	0.0	0	no-hit	0.0	0
scf7180000018350	863866	0.3941	0	52.3022	Eukaryota	65510.0	0	Chordata	65510.0	0	Rodentia	39144.0	1	Bathyergidae	39144.0	2	Heterocephalus	39144.0	2	Heterocephalus glaber	39144.0	2
scf7180000024139	194261	0.4178	0	26.1982	Eukaryota	48141.0	0	Chordata	48141.0	0	Carnivora	48141.0	0	Felidae	30684.0	2	Lynx	15356.0	5	Lynx canadensis	15356.0	6
scf7180000022777	20921	0.4292	0	26.5999	Eukaryota	22501.0	0	Chordata	22501.0	0	Carnivora	22501.0	0	Felidae	20262.0	1	Lynx	15449.0	3	Lynx canadensis	15449.0	3
scf7180000023956	852521	0.4365	0	52.3489	Eukaryota	47917.0	0	Chordata	47917.0	0	Carnivora	47917.0	0	Felidae	47917.0	0	Felis	47917.0	0	Felis catus	47917.0	0
scf7180000024251	1428010	0.3614	0	50.1744	Eukaryota	47246.0	0	Chordata	47246.0	0	Carnivora	47246.0	0	Felidae	47246.0	0	Felis	47246.0	0	Felis catus	47246.0	0
scf7180000021498	12263	0.4844	0	23.6437	Eukaryota	5609.0	0	Chordata	5609.0	0	Carnivora	5609.0	0	Felidae	5609.0	0	Felis	4923.0	1	Felis catus	4923.0	1
scf7180000017593	4860826	0.4303	0	51.3708	Eukaryota	68986.0	0	Chordata	68986.0	0	Carnivora	68986.0	0	Mustelidae	20853.0	4	Mustela	13848.0	7	Mustela putorius	13848.0	7
scf7180000022084	15270	0.4993	0	27.4889	Eukaryota	3646.0	0	Chordata	3646.0	0	Carnivora	3646.0	0	Felidae	3646.0	0	Felis	3289.0	1	Felis catus	3289.0	1
scf7180000017558	2665743	0.4194	0	51.9503	Eukaryota	69707.0	0	Chordata	69707.0	0	Carnivora	69707.0	0	Ursidae	53023.0	1	Ursus	32773.0	2	Ursus arctos	26824.0	3
scf7180000017871	575418	0.3725	0	47.9284	Eukaryota	47456.0	0	Chordata	47456.0	0	Carnivora	47456.0	0	Felidae	47456.0	0	Felis	47456.0	0	Felis catus	47456.0	0
scf7180000019846	27237	0.4059	0	41.0769	Eukaryota	21211.0	0	Chordata	21211.0	0	Carnivora	21211.0	0	Felidae	21211.0	0	Felis	14886.0	1	Felis catus	14886.0	1
scf7180000020590	30007	0.4662	0	43.4669	Eukaryota	3045.0	0	Chordata	3045.0	0	Primates	1495.0	3	Equidae	632.0	8	Equus	632.0	8	unresolved	316.0	9
scf7180000018141	996707	0.4394	0	50.0418	Eukaryota	45898.0	0	Chordata	45898.0	0	Carnivora	45898.0	0	Felidae	45898.0	0	Felis	45898.0	0	Felis catus	45898.0	0
scf7180000021688	23578	0.3683	0	24.0118	Eukaryota	38934.0	0	Chordata	38934.0	0	Carnivora	38934.0	0	Felidae	38934.0	0	Felis	38934.0	0	Felis catus	38934.0	0
scf7180000019377	566883	0.4322	100	53.1432	Eukaryota	32058.0	0	Chordata	32058.0	0	Carnivora	32058.0	0	Felidae	29457.0	1	Felis	11766.0	5	Felis catus	11766.0	6
scf7180000022847	30120	0.4101	0	264.3668	Eukaryota	11946.0	0	Chordata	11946.0	0	Carnivora	11946.0	0	Felidae	11946.0	0	Felis	10771.0	1	Felis catus	10771.0	1
scf7180000024198	61663	0.3512	0	22.9303	Eukaryota	22516.0	0	Chordata	22516.0	0	Carnivora	22516.0	0	Felidae	22516.0	0	Felis	20259.0	1	Felis catus	20259.0	1
scf7180000020481	95946	0.4338	0	25.495	Eukaryota	5521.0	0	Chordata	5521.0	0	Primates	2479.0	2	Hominidae	2479.0	2	Felis	1822.0	3	Felis catus	1822.0	3
scf7180000022427	29331	0.3598	0	23.0444	Eukaryota	15561.0	0	Chordata	15561.0	0	Carnivora	15561.0	0	Felidae	15561.0	0	Felis	15561.0	0	Felis catus	15561.0	0
scf7180000022378	22283	0.4311	0	274.2317	Eukaryota	2343.0	0	Chordata	2343.0	0	Carnivora	2343.0	0	Felidae	2343.0	0	Felis	1702.0	2	Felis catus	1702.0	2
scf7180000023966	830641	0.3957	0	50.6041	Eukaryota	44688.0	0	Chordata	44688.0	0	Carnivora	44688.0	0	Felidae	44688.0	0	Felis	40248.0	1	Felis catus	40248.0	1
scf7180000018592	623261	0.4413	0	50.1633	Eukaryota	44903.0	0	Chordata	44903.0	0	Carnivora	44903.0	0	Felidae	44903.0	0	Felis	44903.0	0	Felis catus	44903.0	0
scf7180000020924	49020	0.4069	0	64.8229	Eukaryota	8004.0	0	Chordata	8004.0	0	Primates	4270.0	2	Hominidae	4270.0	2	Felis	2997.0	3	Felis catus	2997.0	3
scf7180000023036	27592	0.5566	0	116.1287	Eukaryota	6343.0	0	Chordata	6343.0	0	Carnivora	6343.0	0	Felidae	6113.0	1	Felis	2479.0	3	Felis catus	2479.0	3
scf7180000022735	10928	0.3944	0	25.864	Eukaryota	6277.0	0	Chordata	6277.0	0	Carnivora	6277.0	0	Felidae	6277.0	0	Felis	6277.0	0	Felis catus	6277.0	0
scf7180000019013	1090757	0.4581	0	50.8272	Eukaryota	69249.0	0	Chordata	69249.0	0	Carnivora	69249.0	0	Felidae	35176.0	4	Acinonyx	14054.0	8	Acinonyx jubatus	14054.0	8
scf7180000024092	229210	0.5199	0	52.22	Eukaryota	40991.0	0	Chordata	40991.0	0	Carnivora	40991.0	0	Felidae	40991.0	0	Felis	40991.0	0	Felis catus	40991.0	0
scf7180000024211	73246	0.3852	0	25.1532	Eukaryota	32042.0	0	Chordata	32042.0	0	Carnivora	32042.0	0	Felidae	32042.0	0	Felis	28871.0	1	Felis catus	28871.0	1
scf7180000020654	75086	0.6277	0	52.8938	Eukaryota	16578.0	0	Chordata	16578.0	0	Carnivora	16578.0	0	Felidae	16578.0	0	Panthera	11619.0	2	Panthera pardus	11619.0	2
scf7180000022612	7196	0.3883	0	20.7222	Eukaryota	2477.0	0	Chordata	2477.0	0	Carnivora	2477.0	0	Felidae	2477.0	0	Felis	2222.0	1	Felis catus	2222.0	1
scf7180000021798	35456	0.5241	0	49.7249	Eukaryota	4634.0	0	Chordata	4634.0	0	Carnivora	4634.0	0	Felidae	2238.0	2	Felis	2238.0	2	Felis catus	2238.0	2
scf7180000020232	6730	0.4955	0	26.6436	Eukaryota	12620.0	0	Chordata	12620.0	0	Carnivora	12620.0	0	Felidae	5742.0	2	Leptonychotes	2830.0	5	Leptonychotes weddellii	2830.0	5
scf7180000024136	124118	0.3934	0	26.478	Eukaryota	44766.0	0	Chordata	44766.0	0	Carnivora	44766.0	0	Felidae	44766.0	0	Felis	44766.0	0	Felis catus	44766.0	0
scf7180000019683	280855	0.3733	0	49.4439	Eukaryota	46561.0	0	Chordata	46561.0	0	Carnivora	46561.0	0	Felidae	46561.0	0	Felis	46561.0	0	Felis catus	46561.0	0
scf7180000023037	42261	0.3767	0	354.681	Eukaryota	10025.0	0	Chordata	10025.0	0	Apterygiformes	8966.0	1	Apterygidae	8966.0	1	Apteryx	8966.0	1	Apteryx mantelli	8966.0	1
scf7180000020648	73221	0.4055	0	28.9002	Eukaryota	29060.0	0	Chordata	29060.0	0	Carnivora	26360.0	1	Felidae	14888.0	4	Panthera	5900.0	7	Panthera pardus	5900.0	8
scf7180000020985	91110	0.3918	0	52.3612	Eukaryota	10932.0	0	Chordata	10932.0	0	Carnivora	10030.0	1	Felidae	5500.0	2	Canis	4530.0	4	Canis lupus	4530.0	5
scf7180000018941	823967	0.3523	0	47.9069	Eukaryota	47208.0	0	Chordata	47208.0	0	Carnivora	47208.0	0	Felidae	47208.0	0	Felis	47208.0	0	Felis catus	47208.0	0
scf7180000018199	2113116	0.4283	0	51.908	Eukaryota	46710.0	0	Chordata	46710.0	0	Carnivora	46710.0	0	Felidae	46710.0	0	Felis	46710.0	0	Felis catus	46710.0	0
scf7180000019114	451927	0.4015	0	46.8886	Eukaryota	46279.0	0	Chordata	46279.0	0	Carnivora	46279.0	0	Felidae	46279.0	0	Felis	46279.0	0	Felis catus	46279.0	0
scf7180000021091	16830	0.4926	0	365.3267	Eukaryota	6039.0	0	Chordata	6039.0	0	Carnivora	6039.0	0	Phocidae	2464.0	2	Leptonychotes	1848.0	4	Leptonychotes weddellii	1848.0	4
scf7180000020098	57460	0.4981	0	56.852	Eukaryota	23826.0	0	Chordata	23826.0	0	Carnivora	23826.0	0	Felidae	23826.0	0	Felis	23826.0	0	Felis catus	23826.0	0
scf7180000022695	17935	0.4146	0	24.7221	Eukaryota	8376.0	0	Chordata	8376.0	0	Primates	4644.0	2	Hominidae	4644.0	2	Homo	3495.0	3	Homo sapiens	3495.0	3
scf7180000019293	302324	0.4136	0	50.349	Eukaryota	96600.0	0	Chordata	96600.0	0	Carnivora	96600.0	0	Felidae	96600.0	0	Acinonyx	45577.0	2	Acinonyx jubatus	45577.0	2
scf7180000018062	1214253	0.349	0	48.2807	Eukaryota	46452.0	0	Chordata	46452.0	0	Carnivora	46452.0	0	Felidae	46452.0	0	Felis	46452.0	0	Felis catus	46452.0	0
scf7180000021859	16843	0.3723	0	48.4841	Eukaryota	3994.0	0	Chordata	3994.0	0	Carnivora	2517.0	2	Felidae	1156.0	4	Neofelis	867.0	7	Neofelis nebulosa	867.0	7
scf7180000018289	961982	0.3807	0	49.9722	Eukaryota	47126.0	0	Chordata	47126.0	0	Carnivora	47126.0	0	Felidae	47126.0	0	Felis	47126.0	0	Felis catus	47126.0	0
scf7180000018494	1818085	0.4605	100	51.8237	Eukaryota	43344.0	0	Chordata	43344.0	0	Carnivora	43344.0	0	Felidae	43344.0	0	Felis	43344.0	0	Felis catus	43344.0	0
scf7180000018338	858454	0.3456	0	49.0206	Eukaryota	46070.0	0	Chordata	46070.0	0	Carnivora	46070.0	0	Felidae	46070.0	0	Felis	46070.0	0	Felis catus	46070.0	0
scf7180000018458	24324	0.426	0	28.2815	Eukaryota	6115.0	0	Chordata	6115.0	0	Carnivora	6115.0	0	Felidae	3045.0	2	Suricata	2440.0	4	Suricata suricatta	2440.0	4
scf7180000023599	50528	0.4282	0	522.4636	Eukaryota	29775.0	0	Chordata	29775.0	0	Carnivora	29775.0	0	Felidae	29775.0	0	Felis	29775.0	0	Felis catus	29775.0	0
scf7180000020250	179941	0.4591	0	48.9627	Eukaryota	28262.0	0	Chordata	28262.0	0	Carnivora	28262.0	0	Felidae	28262.0	0	Felis	24033.0	1	Felis catus	24033.0	1
scf7180000021628	19102	0.7505	100	62.4018	no-hit	0.0	0	no-hit	0.0	0	no-hit	0.0	0	no-hit	0.0	0	no-hit	0.0	0	no-hit	0.0	0
scf7180000018464	605653	0.4218	0	51.1456	Eukaryota	46450.0	0	Chordata	46450.0	0	Carnivora	46450.0	0	Felidae	46450.0	0	Felis	46450.0	0	Felis catus	46450.0	0
scf7180000022988	33551	0.5538	0	110.2787	Eukaryota	6470.0	0	Chordata	6470.0	0	Carnivora	6470.0	0	Felidae	6220.0	1	Felis	2548.0	3	Felis catus	2548.0	3
scf7180000021673	23972	0.3971	0	26.6215	Eukaryota	33090.0	0	Chordata	33090.0	0	Carnivora	33090.0	0	Felidae	33090.0	0	Felis	33090.0	0	Felis catus	33090.0	0
scf7180000022491	5128	0.6673	0	111.0793	Eukaryota	374.0	0	Chordata	374.0	0	Carnivora	374.0	0	Felidae	374.0	0	Panthera	374.0	0	Panthera pardus	374.0	0
scf7180000021191	44164	0.3726	0	24.7671	Eukaryota	4324.0	0	Chordata	4324.0	0	Carnivora	2102.0	2	Hominidae	1560.0	4	Homo	1560.0	4	Homo sapiens	1560.0	4
scf7180000020626	11716	0.4007	0	16.5195	Eukaryota	34854.0	0	Chordata	34854.0	0	Carnivora	34854.0	0	Felidae	34854.0	0	Felis	34854.0	0	Felis catus	34854.0	0
scf7180000022201	9744	0.3659	0	40.5764	Eukaryota	44387.0	0	Chordata	44387.0	0	Carnivora	44387.0	0	Felidae	44387.0	0	Felis	39984.0	1	Felis catus	39984.0	1
scf7180000019315	25044	0.3848	0	19.8539	Eukaryota	33351.0	0	Chordata	33351.0	0	Carnivora	33351.0	0	Herpestidae	14935.0	2	Suricata	14935.0	4	Suricata suricatta	14935.0	5
scf7180000018854	547899	0.4589	0	50.8007	Eukaryota	47240.0	0	Chordata	47240.0	0	Carnivora	47240.0	0	Felidae	47240.0	0	Felis	47240.0	0	Felis catus	47240.0	0
scf7180000019863	83383	0.4132	0	26.831	Eukaryota	46752.0	0	Chordata	46752.0	0	Carnivora	46752.0	0	Felidae	46752.0	0	Felis	46752.0	0	Felis catus	46752.0	0
scf7180000020245	22767	0.3719	0	20.3557	Eukaryota	39723.0	0	Chordata	39723.0	0	Carnivora	39723.0	0	Felidae	39723.0	0	Felis	39723.0	0	Felis catus	39723.0	0
scf7180000017712	1803121	0.3756	0	50.3525	Eukaryota	47031.0	0	Chordata	47031.0	0	Carnivora	47031.0	0	Felidae	47031.0	0	Felis	47031.0	0	Felis catus	47031.0	0
scf7180000020630	115344	0.3817	0	25.3325	Eukaryota	45102.0	0	Chordata	45102.0	0	Carnivora	45102.0	0	Felidae	45102.0	0	Felis	45102.0	0	Felis catus	45102.0	0
scf7180000018261	946472	0.365	0	50.5049	Eukaryota	61700.0	0	Chordata	61700.0	0	Carnivora	61700.0	0	Felidae	33555.0	1	Acinonyx	33555.0	1	Acinonyx jubatus	33555.0	1
scf7180000019155	561616	0.4193	0	54.4388	Eukaryota	31059.0	0	Chordata	31059.0	0	Carnivora	31059.0	0	Felidae	31059.0	0	Felis	24825.0	1	Felis catus	24825.0	1
scf7180000019297	346974	0.4274	0	51.4858	Eukaryota	26873.0	0	Chordata	26873.0	0	Carnivora	26873.0	0	Felidae	21726.0	1	Panthera	8104.0	4	Panthera pardus	6536.0	5
scf7180000022384	12555	0.4951	0	34.7048	Eukaryota	2994.0	0	Chordata	2994.0	0	Carnivora	2994.0	0	Felidae	2994.0	0	Felis	1794.0	2	Felis catus	1794.0	2
scf7180000020575	71122	0.4191	0	51.064	Eukaryota	6480.0	0	Chordata	6480.0	0	Carnivora	6480.0	0	Felidae	4842.0	1	Felis	3618.0	2	Felis catus	3618.0	2
scf7180000019741	96979	0.3874	0	47.5387	Eukaryota	20450.0	0	Chordata	20450.0	0	Chiroptera	20450.0	0	Pteropodidae	20450.0	0	Rousettus	20450.0	0	Rousettus aegyptiacus	20450.0	0
scf7180000022681	15693	0.4763	0	81.2058	Eukaryota	11954.0	0	Chordata	11954.0	0	Carnivora	11954.0	0	Felidae	11954.0	0	Felis	10783.0	1	Felis catus	10783.0	1
scf7180000020053	16539	0.5233	0	193.3707	Eukaryota	12181.0	0	Chordata	12181.0	0	Carnivora	12181.0	0	Felidae	12181.0	0	Felis	10973.0	1	Felis catus	10973.0	1
scf7180000019059	227816	0.367	0	51.9664	Eukaryota	44687.0	0	Chordata	44687.0	0	Carnivora	44687.0	0	Felidae	44687.0	0	Felis	44687.0	0	Felis catus	44687.0	0
scf7180000019757	54070	0.3693	0	46.9064	Eukaryota	37680.0	0	Chordata	37680.0	0	Carnivora	37680.0	0	Felidae	37680.0	0	Felis	37680.0	0	Felis catus	37680.0	0
scf7180000022839	1315485	0.3959	0	52.8649	Eukaryota	46820.0	0	Chordata	46820.0	0	Carnivora	46820.0	0	Felidae	46820.0	0	Felis	46820.0	0	Felis catus	46820.0	0
scf7180000021092	69723	0.363	0	25.1746	Eukaryota	15448.0	0	Chordata	15448.0	0	Primates	10172.0	1	Hominidae	10172.0	1	Pan	6017.0	2	Pan troglodytes	6017.0	2
scf7180000023039	28427	0.3723	0	229.9668	Eukaryota	10148.0	0	Chordata	10148.0	0	Apterygiformes	9076.0	1	Apterygidae	9076.0	1	Apteryx	9076.0	1	Apteryx mantelli	9076.0	1
scf7180000021281	59546	0.3694	0	24.1134	Eukaryota	23689.0	0	Chordata	23689.0	0	Carnivora	23689.0	0	Felidae	23689.0	0	Felis	21269.0	1	Felis catus	21269.0	1
scf7180000019652	742445	0.3964	200	51.6665	Eukaryota	98794.0	0	Chordata	98794.0	0	Carnivora	98794.0	0	Felidae	98794.0	0	Panthera	79040.0	1	Panthera pardus	79040.0	1
scf7180000023803	1476319	0.4745	0	52.8584	Eukaryota	60260.0	0	Chordata	60260.0	0	Carnivora	60260.0	0	Felidae	44377.0	2	Acinonyx	38007.0	3	Acinonyx jubatus	38007.0	3
scf7180000020416	140770	0.3514	0	49.7702	Eukaryota	12924.0	0	Chordata	12924.0	0	Primates	6837.0	2	Hominidae	6837.0	3	Homo	3909.0	4	Homo sapiens	3909.0	4
scf7180000017643	2159564	0.4589	0	52.8911	Eukaryota	48534.0	0	Chordata	48534.0	0	Carnivora	48534.0	0	Felidae	48534.0	0	Felis	48534.0	0	Felis catus	48534.0	0
scf7180000019783	198359	0.5579	0	45.0778	Eukaryota	5123.0	0	Chordata	5123.0	0	Primates	3133.0	2	Hominidae	3133.0	3	Homo	2484.0	5	Homo sapiens	2484.0	5
scf7180000018590	736127	0.5606	0	54.2761	Eukaryota	24151.0	0	Chordata	24151.0	0	Carnivora	8291.0	5	Felidae	6010.0	6	Homo	5380.0	9	Homo sapiens	5380.0	9
scf7180000019531	92041	0.398	0	48.9033	Eukaryota	9884.0	0	Chordata	9884.0	0	Carnivora	9884.0	0	Felidae	7556.0	1	Felis	7556.0	1	Felis catus	7556.0	1
scf7180000023986	577970	0.4623	0	54.1565	Eukaryota	35524.0	0	Chordata	35524.0	0	Carnivora	27124.0	1	Herpestidae	20856.0	2	Suricata	20856.0	2	Suricata suricatta	20856.0	2
scf7180000022973	35201	0.5296	0	190.5006	Eukaryota	16413.0	0	Chordata	16413.0	0	Carnivora	16413.0	0	Felidae	16413.0	0	Felis	16413.0	0	Felis catus	16413.0	0
scf7180000023797	1731768	0.496	0	52.5237	Eukaryota	44062.0	0	Chordata	44062.0	0	Carnivora	44062.0	0	Felidae	44062.0	0	Felis	17645.0	3	Felis catus	17645.0	3
scf7180000020463	145267	0.5288	0	50.4188	Eukaryota	19463.0	1	Chordata	19463.0	1	Primates	12085.0	3	undef	6268.0	6	undef	6268.0	7	eukaryotic synthetic construct	6268.0	7
scf7180000017747	3028908	0.4086	0	51.3425	Eukaryota	76027.0	0	Chordata	76027.0	0	Carnivora	76027.0	0	Felidae	76027.0	0	Felis	31795.0	2	Felis catus	31795.0	2
scf7180000017820	307514	0.4571	100	52.9615	Eukaryota	45125.0	0	Chordata	45125.0	0	Carnivora	45125.0	0	Felidae	45125.0	0	Felis	45125.0	0	Felis catus	45125.0	0
scf7180000020401	146143	0.4099	0	52.1623	Eukaryota	26593.0	0	Chordata	26593.0	0	Artiodactyla	8458.0	3	Bovidae	8458.0	4	Crocidura	5866.0	5	Bos mutus	4362.0	7
scf7180000023900	786667	0.4564	0	52.67	Eukaryota	45597.0	0	Chordata	45597.0	0	Carnivora	45597.0	0	Felidae	45597.0	0	Felis	36457.0	1	Felis catus	36457.0	2
scf7180000018686	620127	0.4756	0	53.6508	Eukaryota	33036.0	0	Chordata	33036.0	0	Carnivora	25919.0	1	Felidae	14311.0	4	unresolved	5804.0	7	Canis lupus	5804.0	8
scf7180000020422	102316	0.3722	0	23.817	Eukaryota	32853.0	0	Chordata	32853.0	0	Carnivora	32853.0	0	Felidae	32853.0	0	Felis	32853.0	0	Felis catus	32853.0	0
scf7180000021371	4346	0.4257	0	19.6187	Eukaryota	9964.0	0	Chordata	9964.0	0	Carnivora	9964.0	0	Felidae	9964.0	0	Felis	7965.0	1	Felis catus	7965.0	1
scf7180000020705	109126	0.3807	0	23.95	Eukaryota	11279.0	0	Chordata	11279.0	0	Carnivora	11279.0	0	Felidae	11279.0	0	Felis	9059.0	1	Felis catus	9059.0	1
scf7180000022379	30263	0.5371	0	54.6713	Eukaryota	2744.0	0	Chordata	2744.0	0	Carnivora	2744.0	0	Felidae	1014.0	4	Zalophus	512.0	7	Zalophus californianus	512.0	7
scf7180000021678	44782	0.5032	0	49.2734	Eukaryota	16429.0	0	Chordata	16429.0	0	Carnivora	16429.0	0	Canidae	9135.0	3	Canis	7626.0	5	Canis lupus	7626.0	5
scf7180000019853	188035	0.4371	0	51.508	Eukaryota	45020.0	0	Chordata	45020.0	0	Carnivora	45020.0	0	Felidae	45020.0	0	Lynx	22499.0	2	Lynx canadensis	22499.0	2
scf7180000020857	57833	0.4331	0	25.4396	Eukaryota	5964.0	0	Chordata	5964.0	0	Carnivora	5964.0	0	Felidae	5964.0	0	Felis	5964.0	0	Felis catus	5964.0	0
scf7180000018224	279742	0.4617	0	51.3557	Eukaryota	43664.0	0	Chordata	43664.0	0	Carnivora	43664.0	0	Felidae	30856.0	4	Panthera	13334.0	7	Panthera tigris	6728.0	9
scf7180000022934	26777	0.3849	0	203.4363	Eukaryota	12513.0	0	Chordata	12513.0	0	Carnivora	12513.0	0	Felidae	12513.0	0	Felis	10030.0	1	Felis catus	10030.0	1
scf7180000018266	1956408	0.4037	100	50.6945	Eukaryota	46186.0	0	Chordata	46186.0	0	Carnivora	46186.0	0	Felidae	46186.0	0	Felis	46186.0	0	Felis catus	46186.0	0
scf7180000019852	177554	0.4112	0	47.6263	Eukaryota	38698.0	0	Chordata	38698.0	0	Carnivora	38698.0	0	Felidae	38698.0	0	Felis	38698.0	0	Felis catus	38698.0	0
scf7180000019358	3574	0.399	0	19.5283	Eukaryota	6956.0	0	Chordata	6956.0	0	Carnivora	6956.0	0	Felidae	6956.0	0	Felis	6248.0	1	Felis catus	6248.0	1
scf7180000022474	12728	0.368	0	47.5044	Eukaryota	3980.0	1	Chordata	3980.0	1	Primates	2476.0	3	Hominidae	2476.0	4	Homo	2476.0	4	Homo sapiens	2476.0	4
scf7180000018138	1077100	0.4522	0	52.8768	Eukaryota	21717.0	0	Chordata	21717.0	0	Carnivora	21717.0	0	Felidae	21717.0	0	Felis	19528.0	1	Felis catus	19528.0	1
scf7180000017806	1691299	0.3639	0	49.969	Eukaryota	47351.0	0	Chordata	47351.0	0	Carnivora	47351.0	0	Felidae	47351.0	0	Felis	47351.0	0	Felis catus	47351.0	0
scf7180000019497	278427	0.3874	0	51.7009	Eukaryota	17396.0	0	Chordata	17396.0	0	Carnivora	17396.0	0	Felidae	17396.0	0	Felis	15671.0	1	Felis catus	15671.0	1
scf7180000023906	1974075	0.3863	0	50.8275	Eukaryota	54459.0	0	Chordata	54459.0	0	Carnivora	37565.0	1	Felidae	37565.0	2	Felis	33073.0	3	Felis catus	33073.0	3
scf7180000018959	553087	0.3593	0	49.6778	Eukaryota	47531.0	0	Chordata	47531.0	0	Carnivora	47531.0	0	Felidae	47531.0	0	Felis	47531.0	0	Felis catus	47531.0	0
scf7180000021291	57964	0.3656	0	26.0781	Eukaryota	6885.0	0	Chordata	6885.0	0	Primates	3268.0	2	Hominidae	3268.0	3	Homo	2484.0	5	Homo sapiens	2484.0	5
scf7180000022147	9969	0.5213	0	37.5628	no-hit	0.0	0	no-hit	0.0	0	no-hit	0.0	0	no-hit	0.0	0	no-hit	0.0	0	no-hit	0.0	0
scf7180000023771	370805	0.3659	0	49.2708	Eukaryota	46628.0	0	Chordata	46628.0	0	Carnivora	46628.0	0	Felidae	46628.0	0	Felis	46628.0	0	Felis catus	46628.0	0
scf7180000024278	862044	0.3617	0	49.4032	Eukaryota	69047.0	0	Chordata	69047.0	0	Carnivora	69047.0	0	Felidae	24107.0	3	Suricata	18684.0	5	Suricata suricatta	18684.0	5
scf7180000021026	30562	0.4091	0	221.6801	Eukaryota	36917.0	0	Chordata	36917.0	0	Carnivora	36917.0	0	Felidae	36917.0	0	Felis	36917.0	0	Felis catus	36917.0	0
scf7180000018910	69269	0.4436	0	78.059	Eukaryota	9384.0	0	Chordata	9384.0	0	Carnivora	9384.0	0	Felidae	8903.0	1	Felis	7615.0	2	Felis catus	7615.0	2
scf7180000020325	85594	0.4314	0	51.6643	Eukaryota	28282.0	0	Chordata	28282.0	0	Carnivora	28282.0	0	Felidae	28282.0	0	Felis	11198.0	2	Felis catus	11198.0	2
scf7180000024192	77016	0.3749	0	22.5063	Eukaryota	38631.0	0	Chordata	38631.0	0	Carnivora	38631.0	0	Felidae	38631.0	0	Felis	38631.0	0	Felis catus	38631.0	0
scf7180000018577	86777	0.3783	0	48.5043	Eukaryota	45429.0	0	Chordata	45429.0	0	Carnivora	45429.0	0	Felidae	45429.0	0	Felis	45429.0	0	Felis catus	45429.0	0
scf7180000020824	106755	0.4164	0	26.5557	Eukaryota	13265.0	0	Chordata	13265.0	0	Carnivora	13265.0	0	Felidae	13265.0	0	Felis	10630.0	1	Felis catus	10630.0	1
scf7180000019965	212907	0.5206	0	51.4072	Eukaryota	45927.0	0	Chordata	45927.0	0	Carnivora	45927.0	0	Felidae	45927.0	0	Felis	45927.0	0	Felis catus	45927.0	0
scf7180000020197	183898	0.5652	0	52.9924	Eukaryota	37181.0	0	Chordata	37181.0	0	Carnivora	37181.0	0	Felidae	32446.0	1	Felis	28891.0	2	Felis catus	28891.0	2
scf7180000020033	133258	0.3828	0	49.5717	Eukaryota	28018.0	0	Chordata	28018.0	0	Carnivora	28018.0	0	Felidae	28018.0	0	Felis	25271.0	1	Felis catus	25271.0	1
scf7180000022490	12855	0.3924	0	23.1806	Eukaryota	23071.0	0	Chordata	23071.0	0	Carnivora	23071.0	0	Felidae	23071.0	0	Felis	23071.0	0	Felis catus	23071.0	0
scf7180000020638	71064	0.4795	0	25.2255	Eukaryota	13606.0	0	Chordata	13606.0	0	Carnivora	10578.0	1	Felidae	10578.0	1	Acinonyx	4156.0	4	Acinonyx jubatus	4156.0	4
scf7180000017458	3748321	0.3683	0	50.3636	Eukaryota	82196.0	0	Chordata	82196.0	0	Carnivora	82196.0	0	Felidae	82196.0	0	Felis	32942.0	2	Felis catus	32942.0	2
scf7180000018033	1374974	0.3817	0	49.8298	Eukaryota	51669.0	0	Chordata	51669.0	0	Carnivora	51669.0	0	Odobenidae	25933.0	1	Odobenus	25933.0	2	Odobenus rosmarus	25933.0	2
scf7180000023887	824885	0.3612	0	49.2204	Eukaryota	35425.0	0	Chordata	35425.0	0	Carnivora	35425.0	0	Felidae	35425.0	0	Felis	32555.0	1	Felis catus	32555.0	1
scf7180000021478	39147	0.5877	0	46.9079	Eukaryota	2441.0	0	Chordata	2441.0	0	Carnivora	2441.0	0	Felidae	2441.0	0	Felis	2202.0	1	Felis catus	2202.0	1
scf7180000022817	49991	0.4387	0	469.6461	no-hit	0.0	0	no-hit	0.0	0	no-hit	0.0	0	no-hit	0.0	0	no-hit	0.0	0	no-hit	0.0	0
scf7180000022689	6996	0.4182	0	24.4278	Eukaryota	10567.0	0	Chordata	10567.0	0	Carnivora	10567.0	0	Felidae	10567.0	0	Felis	10567.0	0	Felis catus	10567.0	0
scf7180000020613	107450	0.444	0	25.0411	Eukaryota	7380.0	0	Chordata	7380.0	0	Carnivora	7380.0	0	Ursidae	5912.0	1	Ursus	5912.0	1	Ursus arctos	5912.0	1
scf7180000017464	281370	0.4097	0	47.7415	Eukaryota	46166.0	0	Chordata	46166.0	0	Carnivora	46166.0	0	Felidae	46166.0	0	Felis	46166.0	0	Felis catus	46166.0	0
scf7180000020364	109540	0.4564	0	26.5143	Eukaryota	16038.0	0	Chordata	16038.0	0	Artiodactyla	5740.0	4	Suidae	5740.0	4	Sus	5740.0	5	Sus scrofa	5740.0	5
scf7180000021582	71121	0.4038	0	25.2627	Eukaryota	9816.0	0	Chordata	9816.0	0	Carnivora	5085.0	2	Felidae	5085.0	2	Felis	5085.0	3	Felis catus	5085.0	3
scf7180000022627	6348	0.5235	0	23.9193	no-hit	0.0	0	no-hit	0.0	0	no-hit	0.0	0	no-hit	0.0	0	no-hit	0.0	0	no-hit	0.0	0
scf7180000022550	20455	0.4089	0	24.2597	Eukaryota	21714.0	0	Chordata	21714.0	0	Carnivora	21714.0	0	Felidae	21714.0	0	Felis	19531.0	1	Felis catus	19531.0	1
scf7180000019608	144424	0.4386	0	46.6902	Eukaryota	10701.0	0	Chordata	10701.0	0	Carnivora	10701.0	0	Felidae	6469.0	3	Panthera	2197.0	6	Felis catus	2119.0	7
scf7180000023413	78274	0.3957	0	308.951	Eukaryota	6748.0	0	Chordata	6748.0	0	Carnivora	6748.0	0	Felidae	6748.0	0	Felis	6107.0	1	Felis catus	6107.0	1
scf7180000017583	37362	0.3596	0	40.2625	Eukaryota	4285.0	0	Chordata	4285.0	0	Carnivora	2544.0	2	Felidae	1464.0	3	Homo	1460.0	5	Homo sapiens	1460.0	5
scf7180000018902	1041954	0.3736	0	50.6425	Eukaryota	50320.0	0	Chordata	50320.0	0	Carnivora	50320.0	0	Felidae	19504.0	2	Panthera	19504.0	2	Panthera pardus	19504.0	2
scf7180000020922	80103	0.3984	0	25.1922	Eukaryota	30634.0	0	Chordata	30634.0	0	Carnivora	19897.0	1	Felidae	11732.0	3	Canis	8165.0	5	Canis lupus	8165.0	6
scf7180000022577	12993	0.5226	0	23.7725	Eukaryota	8402.0	0	Chordata	8402.0	0	Carnivora	8402.0	0	Felidae	8402.0	0	Panthera	7812.0	1	Panthera pardus	7812.0	1
scf7180000017595	278633	0.3553	0	48.2784	Eukaryota	45546.0	0	Chordata	45546.0	0	Carnivora	45546.0	0	Felidae	45546.0	0	Felis	45546.0	0	Felis catus	45546.0	0
scf7180000023166	30658	0.3899	0	173.8164	Eukaryota	10039.0	0	Chordata	10039.0	0	Apterygiformes	8975.0	1	Apterygidae	8975.0	1	Apteryx	8975.0	1	Apteryx mantelli	8975.0	1
scf7180000022583	6092	0.6906	0	154.5639	Eukaryota	337.0	0	Chordata	337.0	0	Carnivora	337.0	0	Felidae	337.0	0	Panthera	337.0	0	Panthera pardus	337.0	0
scf7180000019579	236421	0.4355	0	50.3074	Eukaryota	28843.0	0	Chordata	28843.0	0	Carnivora	28843.0	0	Felidae	28843.0	0	Felis	25908.0	1	Felis catus	25908.0	1
scf7180000023241	25959	0.379	0	287.0687	Eukaryota	10088.0	0	Chordata	10088.0	0	Apterygiformes	9022.0	1	Apterygidae	9022.0	1	Apteryx	9022.0	1	Apteryx mantelli	9022.0	1
scf7180000020490	12259	0.4324	0	28.0829	Eukaryota	21056.0	0	Chordata	21056.0	0	Carnivora	21056.0	0	Felidae	21056.0	0	Felis	21056.0	0	Felis catus	21056.0	0
scf7180000019490	220249	0.4699	0	52.7607	Eukaryota	29692.0	0	Chordata	29692.0	0	Carnivora	29692.0	0	Felidae	29692.0	0	Felis	23743.0	1	Felis catus	23743.0	1
scf7180000021448	64649	0.4658	0	25.5005	Eukaryota	11434.0	0	Chordata	11434.0	0	Primates	4834.0	2	Hominidae	4834.0	4	Homo	3860.0	5	Homo sapiens	3860.0	5
scf7180000017912	362338	0.3806	0	49.6838	Eukaryota	20752.0	0	Chordata	20752.0	0	Carnivora	20752.0	0	Felidae	20752.0	0	Felis	20752.0	0	Felis catus	20752.0	0
scf7180000022536	22736	0.364	0	24.7269	Eukaryota	12864.0	0	Chordata	12864.0	0	Carnivora	12864.0	0	Felidae	12864.0	0	Felis	11600.0	1	Felis catus	11600.0	1
scf7180000023213	95069	0.5176	0	486.5986	Eukaryota	15311.0	0	Chordata	15311.0	0	Carnivora	15311.0	0	Felidae	15311.0	0	Felis	15311.0	0	Felis catus	15311.0	0
scf7180000021248	65915	0.3577	0	25.572	Eukaryota	16652.0	0	Chordata	16652.0	0	Primates	13260.0	2	Hominidae	13260.0	2	Homo	8048.0	3	Homo sapiens	8048.0	3
scf7180000023868	1248250	0.435	0	51.8372	Eukaryota	42670.0	0	Chordata	42670.0	0	Carnivora	42670.0	0	Felidae	42670.0	0	Felis	42670.0	0	Felis catus	42670.0	0
scf7180000017937	4044	0.4881	0	22.5526	Eukaryota	2224.0	0	Chordata	2224.0	0	Carnivora	2224.0	0	Felidae	2224.0	0	Felis	1776.0	1	Felis catus	1776.0	1
scf7180000018428	313692	0.3848	0	51.115	Eukaryota	46940.0	0	Chordata	46940.0	0	Carnivora	46940.0	0	Felidae	46940.0	0	Felis	46940.0	0	Felis catus	46940.0	0
scf7180000024118	338819	0.3993	0	51.2038	Eukaryota	62966.0	0	Chordata	62966.0	0	Carnivora	62966.0	0	Felidae	62966.0	0	Felis	38254.0	1	Felis catus	38254.0	1
scf7180000022254	15412	0.5511	0	53.307	Eukaryota	2384.0	0	Chordata	2384.0	0	Carnivora	1311.0	1	Felidae	1311.0	2	Felis	1311.0	2	Felis catus	1311.0	2
scf7180000017528	6766	0.4005	0	22.4964	Eukaryota	33556.0	0	Chordata	33556.0	0	Carnivora	33556.0	0	Felidae	33556.0	0	Felis	33556.0	0	Felis catus	33556.0	0
scf7180000018339	708864	0.4854	0	51.416	Eukaryota	32676.0	0	Chordata	32676.0	0	Carnivora	32676.0	0	Felidae	22781.0	1	Suricata	9895.0	5	Suricata suricatta	9895.0	6
scf7180000018988	2074181	0.3815	100	50.8666	Eukaryota	46866.0	0	Chordata	46866.0	0	Carnivora	46866.0	0	Felidae	46866.0	0	Felis	46866.0	0	Felis catus	46866.0	0
scf7180000022273	6409	0.3862	0	27.1672	Eukaryota	17494.0	0	Chordata	17494.0	0	Carnivora	17494.0	0	Felidae	17494.0	0	Felis	15761.0	1	Felis catus	15761.0	1
scf7180000018867	532726	0.419	0	50.6246	Eukaryota	54343.0	0	Chordata	54343.0	0	Carnivora	50195.0	1	Felidae	46014.0	2	Panthera	14939.0	5	Lynx canadensis	10951.0	6
scf7180000022885	32818	0.3968	0	240.5251	Eukaryota	45640.0	0	Chordata	45640.0	0	Carnivora	45640.0	0	Felidae	45640.0	0	Felis	41139.0	1	Felis catus	41139.0	1
scf7180000018505	1548840	0.4059	0	51.4525	Eukaryota	54295.0	0	Chordata	54295.0	0	Carnivora	54295.0	0	Felidae	48721.0	1	Lynx	16245.0	4	Lynx canadensis	16245.0	5
scf7180000022732	21250	0.4544	0	25.2156	Eukaryota	3086.0	0	Chordata	3086.0	0	Artiodactyla	1579.0	3	Bovidae	786.0	5	Suricata	715.0	6	Suricata suricatta	715.0	6
scf7180000017735	1860029	0.3849	0	51.331	Eukaryota	49299.0	0	Chordata	49299.0	0	Carnivora	49299.0	0	Felidae	42898.0	1	Felis	42898.0	1	Felis catus	42898.0	1
scf7180000018087	325200	0.3661	0	45.9582	Eukaryota	46806.0	0	Chordata	46806.0	0	Carnivora	46806.0	0	Felidae	37025.0	2	Felis	37025.0	2	Felis catus	37025.0	2
scf7180000021939	14957	0.6375	0	51.131	Eukaryota	12190.0	0	Chordata	12190.0	0	Carnivora	11041.0	1	Felidae	11041.0	3	Acinonyx	5916.0	4	Acinonyx jubatus	5916.0	4
scf7180000018437	893995	0.4197	0	52.5993	Eukaryota	44585.0	0	Chordata	44585.0	0	Carnivora	44585.0	0	Felidae	44585.0	0	Felis	40121.0	1	Felis catus	40121.0	1
scf7180000018220	1010002	0.4458	0	50.4257	Eukaryota	18411.0	0	Chordata	18411.0	0	Carnivora	18411.0	0	Felidae	18411.0	0	Felis	14737.0	1	Felis catus	14737.0	1
scf7180000021412	61161	0.4909	0	52.2949	Eukaryota	37547.0	0	Chordata	37547.0	0	Carnivora	37547.0	0	Felidae	30508.0	2	Acinonyx	11489.0	4	Acinonyx jubatus	11489.0	4
scf7180000019352	772584	0.416	100	50.77	Eukaryota	48612.0	0	Chordata	48612.0	0	Carnivora	48612.0	0	Felidae	48612.0	0	Felis	41973.0	1	Felis catus	41973.0	1
scf7180000022852	882149	0.4944	0	66.2106	Eukaryota	44178.0	0	Chordata	44178.0	0	Carnivora	44178.0	0	Felidae	44178.0	0	Felis	44178.0	0	Felis catus	44178.0	0
scf7180000023247	23491	0.3904	0	269.5856	Eukaryota	4074.0	0	Chordata	4074.0	0	Primates	2577.0	2	Hominidae	2200.0	3	Homo	2200.0	4	Homo sapiens	2200.0	4
scf7180000020847	77900	0.3873	0	25.5091	Eukaryota	8650.0	0	Chordata	8650.0	0	Carnivora	4729.0	3	Felidae	2708.0	5	Vulpes	2021.0	8	Vulpes vulpes	2021.0	8
scf7180000020666	153422	0.3624	0	26.1101	Eukaryota	45310.0	0	Chordata	45310.0	0	Carnivora	45310.0	0	Felidae	45310.0	0	Felis	45310.0	0	Felis catus	45310.0	0
scf7180000024241	355738	0.4341	0	51.1646	Eukaryota	47179.0	0	Chordata	47179.0	0	Carnivora	47179.0	0	Felidae	47179.0	0	Felis	47179.0	0	Felis catus	47179.0	0
scf7180000018051	24792	0.3777	0	43.0015	Eukaryota	20639.0	0	Chordata	20639.0	0	Carnivora	20639.0	0	Felidae	20639.0	0	Felis	18583.0	1	Felis catus	18583.0	1
scf7180000021389	38546	0.3484	0	23.9946	Eukaryota	10618.0	0	Chordata	10618.0	0	Carnivora	4861.0	2	Felidae	4861.0	2	Felis	4013.0	4	Felis catus	4013.0	4
scf7180000022210	15085	0.4325	0	30.7054	Eukaryota	17494.0	0	Chordata	17494.0	0	Carnivora	17494.0	0	Felidae	17494.0	0	Felis	15741.0	1	Felis catus	15741.0	1
scf7180000019341	317194	0.38	0	50.6166	Eukaryota	45999.0	0	Chordata	45999.0	0	Carnivora	45999.0	0	Felidae	45999.0	0	Felis	45999.0	0	Felis catus	45999.0	0
scf7180000017884	1462275	0.3632	0	49.8107	Eukaryota	47009.0	0	Chordata	47009.0	0	Carnivora	47009.0	0	Felidae	47009.0	0	Felis	47009.0	0	Felis catus	47009.0	0
scf7180000019093	42133	0.3676	0	24.325	Eukaryota	42369.0	0	Chordata	42369.0	0	Carnivora	42369.0	0	Felidae	42369.0	0	Felis	42369.0	0	Felis catus	42369.0	0
scf7180000024260	470885	0.5218	0	50.6904	Eukaryota	90188.0	0	Chordata	90188.0	0	Carnivora	90188.0	0	Felidae	62952.0	1	Panthera	53648.0	2	Panthera pardus	53648.0	2
scf7180000017623	1797590	0.4732	0	52.7816	Eukaryota	81403.0	0	Chordata	81403.0	0	Carnivora	81403.0	0	Felidae	48612.0	1	Lynx	48612.0	1	Lynx canadensis	48612.0	1
scf7180000020285	178506	0.3785	0	23.7506	Eukaryota	45382.0	0	Chordata	45382.0	0	Carnivora	45382.0	0	Felidae	45382.0	0	Felis	45382.0	0	Felis catus	45382.0	0
scf7180000023146	42185	0.4342	0	138.7475	Eukaryota	5743.0	0	Chordata	5743.0	0	Carnivora	5743.0	0	Felidae	5743.0	0	Felis	5292.0	1	Felis catus	5292.0	1
scf7180000018264	91481	0.367	0	47.0315	Eukaryota	29066.0	0	Chordata	29066.0	0	Carnivora	29066.0	0	Felidae	29066.0	0	Felis	29066.0	0	Felis catus	29066.0	0
scf7180000018221	1467801	0.354	0	49.0166	Eukaryota	47076.0	0	Chordata	47076.0	0	Carnivora	47076.0	0	Felidae	47076.0	0	Felis	47076.0	0	Felis catus	47076.0	0
scf7180000019768	164746	0.4188	0	47.3141	Eukaryota	36414.0	0	Chordata	36414.0	0	Carnivora	36414.0	0	Felidae	36414.0	0	Felis	36414.0	0	Felis catus	36414.0	0
scf7180000018010	23084	0.5269	0	475.3203	Eukaryota	2192.0	0	Chordata	2192.0	0	Carnivora	2192.0	0	Felidae	2192.0	0	Felis	1818.0	2	Felis catus	1818.0	2
scf7180000018664	268016	0.5365	0	47.8823	Eukaryota	15786.0	0	Chordata	15786.0	0	Carnivora	15786.0	0	Felidae	15786.0	0	Panthera	15786.0	0	Panthera pardus	15786.0	0
scf7180000023363	19861	0.5086	0	385.5266	no-hit	0.0	0	no-hit	0.0	0	no-hit	0.0	0	no-hit	0.0	0	no-hit	0.0	0	no-hit	0.0	0
scf7180000023910	604122	0.4005	0	49.2008	Eukaryota	45335.0	0	Chordata	45335.0	0	Carnivora	45335.0	0	Felidae	45335.0	0	Felis	45335.0	0	Felis catus	45335.0	0
scf7180000023469	37519	0.6727	0	287.1789	Eukaryota	2579.0	0	Chordata	2579.0	0	Rodentia	1046.0	3	Caviidae	783.0	4	Cavia	783.0	4	Cavia porcellus	783.0	4
scf7180000018894	515371	0.4287	0	49.5584	Eukaryota	57187.0	1	Chordata	57187.0	1	Carnivora	39180.0	3	Felidae	23577.0	4	Canis	15603.0	5	Canis lupus	15603.0	5
scf7180000020332	23091	0.4752	0	441.333	Eukaryota	24577.0	0	Chordata	24577.0	0	Carnivora	24577.0	0	Felidae	24577.0	0	Felis	22085.0	1	Felis catus	22085.0	1
scf7180000020864	12452	0.4083	0	42.0876	Eukaryota	4855.0	0	Chordata	4855.0	0	Carnivora	3973.0	2	Felidae	3973.0	2	Felis	2320.0	4	Felis catus	2320.0	4
scf7180000023471	18767	0.4816	0	116.0139	no-hit	0.0	0	no-hit	0.0	0	no-hit	0.0	0	no-hit	0.0	0	no-hit	0.0	0	no-hit	0.0	0
scf7180000018519	196835	0.4337	0	52.2122	Eukaryota	35811.0	0	Chordata	35811.0	0	Carnivora	35811.0	0	Felidae	35811.0	0	Felis	32281.0	1	Felis catus	32281.0	1
scf7180000021877	34298	0.367	0	25.0182	Eukaryota	14010.0	0	Chordata	14010.0	0	Carnivora	14010.0	0	Felidae	14010.0	0	Felis	12510.0	1	Felis catus	12510.0	1
scf7180000021210	48714	0.3956	0	28.9951	Eukaryota	45476.0	0	Chordata	45476.0	0	Carnivora	45476.0	0	Felidae	45476.0	0	Felis	45476.0	0	Felis catus	45476.0	0
scf7180000023812	1576473	0.4192	0	51.533	Eukaryota	81041.0	0	Chordata	81041.0	0	Carnivora	81041.0	0	Felidae	32485.0	5	Lynx	16248.0	7	Lynx canadensis	16248.0	7
scf7180000019214	408506	0.4387	0	51.3411	Eukaryota	33270.0	0	Chordata	33270.0	0	Carnivora	33270.0	0	Felidae	29386.0	1	Felis	8768.0	6	Felis catus	8768.0	7
scf7180000019978	209951	0.5255	0	50.9421	Eukaryota	11165.0	0	Chordata	11165.0	0	Carnivora	11165.0	0	Felidae	8916.0	1	Felis	6623.0	2	Felis catus	6623.0	2
scf7180000023990	580676	0.4049	0	50.098	Eukaryota	45913.0	0	Chordata	45913.0	0	Carnivora	45913.0	0	Felidae	45913.0	0	Felis	45913.0	0	Felis catus	45913.0	0
scf7180000017523	2591125	0.3738	0	50.0569	Eukaryota	47677.0	0	Chordata	47677.0	0	Carnivora	47677.0	0	Felidae	47677.0	0	Felis	47677.0	0	Felis catus	47677.0	0
scf7180000021344	53547	0.5388	0	47.8013	Eukaryota	5891.0	1	Chordata	5891.0	1	Primates	3074.0	4	Hominidae	3074.0	4	Homo	1574.0	5	Homo sapiens	1574.0	5
scf7180000018389	792480	0.3512	0	49.4813	Eukaryota	47547.0	0	Chordata	47547.0	0	Carnivora	47547.0	0	Felidae	47547.0	0	Felis	47547.0	0	Felis catus	47547.0	0
scf7180000020594	48988	0.4212	0	46.6621	Eukaryota	37317.0	0	Chordata	37317.0	0	Carnivora	37317.0	0	Felidae	37317.0	0	Acinonyx	18785.0	2	Acinonyx jubatus	18785.0	3
scf7180000019538	331113	0.4055	0	52.2971	Eukaryota	14702.0	0	Chordata	14702.0	0	Carnivora	14702.0	0	Felidae	14702.0	0	Felis	12053.0	2	Felis catus	12053.0	2
scf7180000020400	97171	0.3807	0	25.1659	Eukaryota	19981.0	0	Chordata	19981.0	0	Carnivora	19981.0	0	Felidae	19981.0	0	Felis	18344.0	1	Felis catus	18344.0	1
scf7180000018273	1114061	0.5144	0	52.2148	Eukaryota	46900.0	0	Chordata	46900.0	0	Carnivora	46900.0	0	Felidae	46900.0	0	Felis	46900.0	0	Felis catus	46900.0	0
scf7180000022615	7649	0.6139	0	199.3665	Eukaryota	2027.0	0	Chordata	2027.0	0	Carnivora	2027.0	0	Felidae	1594.0	2	Felis	621.0	4	Felis catus	621.0	6
scf7180000019899	193632	0.4	0	47.055	Eukaryota	46597.0	0	Chordata	46597.0	0	Carnivora	46597.0	0	Felidae	46597.0	0	Felis	46597.0	0	Felis catus	46597.0	0
scf7180000023418	31826	0.5099	0	101.6476	Eukaryota	6998.0	0	Chordata	6998.0	0	Carnivora	6998.0	0	Felidae	6998.0	0	Felis	6560.0	1	Felis catus	6560.0	1
scf7180000019547	313849	0.5384	0	46.8089	Eukaryota	18993.0	0	Chordata	18993.0	0	Carnivora	18993.0	0	Felidae	13511.0	2	Felis	13511.0	2	Felis catus	13511.0	2
scf7180000022020	21536	0.4102	0	24.513	Eukaryota	24220.0	0	Chordata	24220.0	0	Carnivora	24220.0	0	Felidae	24220.0	0	Felis	24220.0	0	Felis catus	24220.0	0
scf7180000023860	2033022	0.4297	0	51.5953	Eukaryota	50053.0	0	Chordata	50053.0	0	Carnivora	50053.0	0	Felidae	50053.0	0	Lynx	24580.0	2	Lynx canadensis	24580.0	2
scf7180000020736	83163	0.383	0	25.478	Eukaryota	23182.0	0	Chordata	23182.0	0	Carnivora	23182.0	0	Felidae	18669.0	1	Panthera	9322.0	5	Panthera pardus	6998.0	6
scf7180000020122	200302	0.4439	0	48.5803	Eukaryota	50379.0	0	Chordata	50379.0	0	Carnivora	50379.0	0	Felidae	50379.0	0	Panthera	25210.0	2	Panthera pardus	25210.0	2
scf7180000023924	778945	0.3733	0	50.0798	Eukaryota	47676.0	0	Chordata	47676.0	0	Carnivora	47676.0	0	Felidae	47676.0	0	Felis	42883.0	1	Felis catus	42883.0	1
scf7180000022960	21150	0.3949	0	210.5774	Eukaryota	7002.0	0	Chordata	7002.0	0	Carnivora	7002.0	0	Felidae	7002.0	0	Felis	7002.0	0	Felis catus	7002.0	0
scf7180000019845	236468	0.3551	0	49.4083	Eukaryota	30028.0	0	Chordata	30028.0	0	Carnivora	30028.0	0	Felidae	30028.0	0	Felis	27003.0	1	Felis catus	27003.0	1
scf7180000022262	21022	0.3623	0	23.5936	Eukaryota	7975.0	0	Chordata	7975.0	0	Carnivora	7975.0	0	Felidae	5548.0	1	Felis	5548.0	1	Felis catus	5548.0	1
scf7180000022858	676473	0.4886	0	58.0012	Eukaryota	53694.0	0	Chordata	53694.0	0	Carnivora	53694.0	0	Ursidae	53694.0	0	Ursus	32250.0	1	Ursus arctos	26870.0	2
scf7180000018877	647093	0.3951	0	51.5282	Eukaryota	47139.0	0	Chordata	47139.0	0	Carnivora	47139.0	0	Felidae	47139.0	0	Felis	47139.0	0	Felis catus	47139.0	0
scf7180000018801	1308801	0.3965	100	50.7598	Eukaryota	38491.0	0	Chordata	38491.0	0	Carnivora	38491.0	0	Felidae	38491.0	0	Felis	34668.0	1	Felis catus	34668.0	1
scf7180000020483	97496	0.5358	0	49.3174	Eukaryota	6200.0	0	Chordata	6200.0	0	Carnivora	6200.0	0	Herpestidae	2729.0	2	Suricata	2729.0	2	Suricata suricatta	2729.0	2
scf7180000023756	3351750	0.3797	0	49.6322	Eukaryota	46780.0	0	Chordata	46780.0	0	Carnivora	46780.0	0	Felidae	46780.0	0	Felis	41797.0	1	Felis catus	41797.0	1
scf7180000018753	877537	0.4565	0	50.9006	Eukaryota	44881.0	0	Chordata	44881.0	0	Carnivora	44881.0	0	Felidae	41872.0	1	Acinonyx	13348.0	4	Acinonyx jubatus	13348.0	5
scf7180000023053	232420	0.5421	0	57.5834	Eukaryota	9270.0	0	Chordata	9270.0	0	Apterygiformes	8326.0	1	Apterygidae	8326.0	1	Apteryx	8326.0	1	Apteryx mantelli	8326.0	1
scf7180000023578	26447	0.4629	0	301.0497	no-hit	0.0	0	no-hit	0.0	0	no-hit	0.0	0	no-hit	0.0	0	no-hit	0.0	0	no-hit	0.0	0
scf7180000018915	593894	0.3753	0	51.6718	Eukaryota	74935.0	0	Chordata	74935.0	0	Carnivora	74935.0	0	Herpestidae	44240.0	1	Suricata	44240.0	4	Suricata suricatta	44240.0	4
scf7180000017655	2838666	0.3819	0	49.947	Eukaryota	43983.0	0	Chordata	43983.0	0	Carnivora	43983.0	0	Felidae	43983.0	0	Felis	39419.0	1	Felis catus	39419.0	1
scf7180000018469	164078	0.3743	0	50.976	Eukaryota	46403.0	0	Chordata	46403.0	0	Carnivora	46403.0	0	Felidae	46403.0	0	Felis	46403.0	0	Felis catus	46403.0	0
scf7180000019576	187313	0.3523	0	46.3936	Eukaryota	45861.0	0	Chordata	45861.0	0	Carnivora	45861.0	0	Felidae	45861.0	0	Felis	45861.0	0	Felis catus	45861.0	0
scf7180000018393	1117674	0.424	0	52.2664	Eukaryota	45972.0	0	Chordata	45972.0	0	Carnivora	45972.0	0	Felidae	45972.0	0	Felis	45972.0	0	Felis catus	45972.0	0
scf7180000020354	254233	0.3885	0	51.5705	Eukaryota	46991.0	0	Chordata	46991.0	0	Carnivora	46991.0	0	Felidae	46991.0	0	Felis	46991.0	0	Felis catus	46991.0	0
scf7180000020028	6736	0.5338	0	162.8242	Eukaryota	12009.0	0	Chordata	12009.0	0	Carnivora	12009.0	0	Felidae	12009.0	0	Felis	12009.0	0	Felis catus	12009.0	0
scf7180000019037	912986	0.4138	0	52.8229	Eukaryota	83196.0	0	Chordata	83196.0	0	Carnivora	83196.0	0	Felidae	33730.0	3	Suricata	26079.0	5	Suricata suricatta	26079.0	5
scf7180000018079	972422	0.4548	0	52.0316	Eukaryota	56981.0	0	Chordata	56981.0	0	Carnivora	56981.0	0	Felidae	56981.0	0	Felis	36689.0	1	Felis catus	36689.0	1
scf7180000019543	254073	0.3995	0	51.3492	Eukaryota	88423.0	0	Chordata	88423.0	0	Carnivora	88423.0	0	Felidae	77825.0	1	Panthera	29128.0	4	Felis catus	29097.0	5
scf7180000024085	297857	0.5721	0	48.1642	Eukaryota	29134.0	0	Chordata	29134.0	0	Carnivora	29134.0	0	Felidae	23272.0	1	Felis	23272.0	1	Felis catus	23272.0	1
scf7180000018960	508464	0.3732	0	50.778	Eukaryota	47400.0	0	Chordata	47400.0	0	Carnivora	47400.0	0	Felidae	47400.0	0	Felis	37039.0	2	Felis catus	37039.0	2
scf7180000020906	71227	0.3645	0	23.9064	Eukaryota	29900.0	0	Chordata	29900.0	0	Carnivora	29900.0	0	Felidae	29900.0	0	Felis	26863.0	1	Felis catus	26863.0	1
scf7180000019879	27566	0.4241	0	24.7533	Eukaryota	5709.0	0	Chordata	5709.0	0	Carnivora	5709.0	0	Felidae	5709.0	0	Felis	5709.0	0	Felis catus	5709.0	0
scf7180000022622	6530	0.6513	0	43.909	no-hit	0.0	0	no-hit	0.0	0	no-hit	0.0	0	no-hit	0.0	0	no-hit	0.0	0	no-hit	0.0	0
scf7180000018844	558216	0.3469	0	47.915	Eukaryota	45526.0	0	Chordata	45526.0	0	Carnivora	45526.0	0	Felidae	45526.0	0	Felis	45526.0	0	Felis catus	45526.0	0
scf7180000022184	28985	0.4225	0	25.3432	Eukaryota	5618.0	0	Chordata	5618.0	0	Carnivora	3778.0	1	Delphinidae	1840.0	3	Globicephala	1840.0	5	Globicephala melas	1840.0	5
scf7180000021237	77919	0.4576	0	24.1322	Eukaryota	11399.0	0	Chordata	11399.0	0	Primates	8254.0	1	Hominidae	8254.0	3	Homo	5476.0	4	Homo sapiens	5476.0	4
scf7180000024129	193955	0.4418	0	51.1928	Eukaryota	11989.0	0	Chordata	11989.0	0	Carnivora	11989.0	0	Felidae	11989.0	0	Felis	9785.0	1	Felis catus	9785.0	2
scf7180000022505	7492	0.5039	0	56.7374	Eukaryota	2817.0	0	Chordata	2817.0	0	Carnivora	2817.0	0	Felidae	2817.0	0	Felis	1678.0	1	Felis catus	1678.0	1
scf7180000021813	13600	0.5212	0	98.0617	no-hit	0.0	0	no-hit	0.0	0	no-hit	0.0	0	no-hit	0.0	0	no-hit	0.0	0	no-hit	0.0	0
scf7180000017842	595214	0.3902	0	52.2166	Eukaryota	45430.0	0	Chordata	45430.0	0	Carnivora	45430.0	0	Felidae	45430.0	0	Felis	45430.0	0	Felis catus	45430.0	0
scf7180000019390	381817	0.3589	0	50.7836	Eukaryota	38538.0	0	Chordata	38538.0	0	Primates	25147.0	2	Hominidae	25147.0	3	Homo	25147.0	3	Homo sapiens	25147.0	3
scf7180000022005	18406	0.4628	0	352.945	no-hit	0.0	0	no-hit	0.0	0	no-hit	0.0	0	no-hit	0.0	0	no-hit	0.0	0	no-hit	0.0	0
scf7180000017873	46603	0.4134	0	24.5782	Eukaryota	5743.0	1	Chordata	5743.0	1	Carnivora	3832.0	3	Felidae	3832.0	3	Felis	3832.0	3	Felis catus	3832.0	3
scf7180000018496	187054	0.4415	0	51.7332	Eukaryota	13047.0	0	Chordata	13047.0	0	Carnivora	13047.0	0	Felidae	13047.0	0	Felis	13047.0	0	Felis catus	13047.0	0
scf7180000018542	663958	0.4573	0	52.995	Eukaryota	38708.0	0	Chordata	38708.0	0	Carnivora	38708.0	0	Felidae	32271.0	2	Panthera	15088.0	5	Panthera tigris	9118.0	6
scf7180000019032	454904	0.4844	0	47.9003	Eukaryota	29955.0	0	Chordata	29955.0	0	Carnivora	29955.0	0	Felidae	24307.0	1	Felis	24307.0	1	Felis catus	24307.0	1
scf7180000019073	4165772	0.411	100	50.3504	Eukaryota	47409.0	0	Chordata	47409.0	0	Carnivora	47409.0	0	Felidae	47409.0	0	Felis	47409.0	0	Felis catus	47409.0	0
scf7180000022417	13330	0.3672	0	23.515	Eukaryota	4632.0	0	Chordata	4632.0	0	Carnivora	4632.0	0	Felidae	3260.0	1	Felis	3260.0	1	Felis catus	3260.0	1
scf7180000017627	2131931	0.438	0	51.5598	Eukaryota	47145.0	0	Chordata	47145.0	0	Carnivora	47145.0	0	Felidae	47145.0	0	Felis	47145.0	0	Felis catus	47145.0	0
scf7180000022436	20578	0.6061	0	43.8394	Eukaryota	5509.0	0	Chordata	5509.0	0	Carnivora	5509.0	0	Felidae	4241.0	2	Panthera	1766.0	4	Panthera pardus	1766.0	4
scf7180000017749	79981	0.403	0	45.0088	Eukaryota	35952.0	0	Chordata	35952.0	0	Carnivora	35952.0	0	Felidae	35952.0	0	Felis	35952.0	0	Felis catus	35952.0	0
scf7180000019273	341516	0.4394	0	49.1159	Eukaryota	52204.0	0	Chordata	52204.0	0	Carnivora	52204.0	0	Felidae	23516.0	4	Felis	6394.0	9	Felis catus	6394.0	9
scf7180000019516	150658	0.3915	0	25.5985	Eukaryota	27042.0	0	Chordata	27042.0	0	Carnivora	27042.0	0	Felidae	27042.0	0	Felis	18911.0	2	Felis catus	18911.0	2
scf7180000021763	45615	0.3926	0	25.0319	Eukaryota	19942.0	0	Chordata	19942.0	0	Carnivora	19942.0	0	Felidae	6304.0	5	Acinonyx	2117.0	9	Acinonyx jubatus	2117.0	9
scf7180000018807	743748	0.3926	0	50.3538	Eukaryota	29837.0	0	Chordata	29837.0	0	Carnivora	29837.0	0	Felidae	29837.0	0	Felis	26839.0	1	Felis catus	26839.0	1
scf7180000022692	5586	0.6459	0	50.8419	Eukaryota	2084.0	0	Chordata	2084.0	0	Carnivora	2084.0	0	Felidae	2084.0	0	Felis	2084.0	0	Felis catus	2084.0	0
scf7180000022794	13418	0.3679	0	27.2158	Eukaryota	13384.0	0	Chordata	13384.0	0	Carnivora	11527.0	1	Felidae	6979.0	2	Felis	5051.0	3	Felis catus	5051.0	3
scf7180000023903	1039718	0.4591	0	51.7102	Eukaryota	76254.0	0	Chordata	76254.0	0	Carnivora	76254.0	0	Felidae	62436.0	1	Acinonyx	31264.0	2	Acinonyx jubatus	31264.0	2
scf7180000018843	569523	0.4178	0	50.845	Eukaryota	31575.0	0	Chordata	31575.0	0	Carnivora	31575.0	0	Felidae	16150.0	1	Suricata	15425.0	2	Suricata suricatta	15425.0	3
scf7180000022144	74527	0.4372	0	24.6561	Eukaryota	8331.0	0	Chordata	8331.0	0	Carnivora	4583.0	2	Felidae	3875.0	3	Felis	3875.0	4	Felis catus	3875.0	4
scf7180000022701	12545	0.4007	0	24.1085	Eukaryota	31067.0	0	Chordata	31067.0	0	Carnivora	31067.0	0	Felidae	31067.0	0	Felis	27944.0	1	Felis catus	27944.0	1
scf7180000021789	29444	0.4071	0	26.7721	Eukaryota	8462.0	0	Chordata	8462.0	0	Artiodactyla	8462.0	0	Bovidae	7538.0	1	Ovis	7538.0	1	Ovis canadensis	7538.0	1
scf7180000019983	550183	0.4753	0	49.7104	Eukaryota	40474.0	0	Chordata	40474.0	0	Carnivora	40474.0	0	Felidae	40474.0	0	Lynx	20960.0	1	Lynx canadensis	20960.0	2
scf7180000018593	975131	0.5185	100	51.5285	Eukaryota	23078.0	0	Chordata	23078.0	0	Carnivora	23078.0	0	Otariidae	16100.0	1	Zalophus	9200.0	2	Zalophus californianus	9200.0	2
scf7180000019554	317087	0.3682	0	49.1385	Eukaryota	45266.0	0	Chordata	45266.0	0	Carnivora	45266.0	0	Felidae	45266.0	0	Felis	45266.0	0	Felis catus	45266.0	0
scf7180000018837	844977	0.4026	0	51.6015	Eukaryota	47551.0	0	Chordata	47551.0	0	Carnivora	47551.0	0	Felidae	47551.0	0	Felis	47551.0	0	Felis catus	47551.0	0
scf7180000020361	212915	0.5281	0	48.5933	Eukaryota	20257.0	0	Chordata	20257.0	0	Carnivora	20257.0	0	Felidae	20257.0	0	Felis	20257.0	0	Felis catus	20257.0	0
scf7180000023676	157620	0.493	0	534.3911	Eukaryota	15167.0	0	Chordata	15167.0	0	Carnivora	15167.0	0	Felidae	15167.0	0	Felis	15167.0	0	Felis catus	15167.0	0
scf7180000023879	804016	0.3622	0	49.9664	Eukaryota	46972.0	0	Chordata	46972.0	0	Carnivora	46972.0	0	Felidae	46972.0	0	Felis	46972.0	0	Felis catus	46972.0	0
scf7180000019593	266329	0.3737	0	48.3636	Eukaryota	42162.0	0	Chordata	42162.0	0	Carnivora	42162.0	0	Felidae	42162.0	0	Felis	42162.0	0	Felis catus	42162.0	0
scf7180000020584	108472	0.3732	0	25.2558	Eukaryota	41910.0	0	Chordata	41910.0	0	Carnivora	41910.0	0	Felidae	41910.0	0	Felis	41910.0	0	Felis catus	41910.0	0
scf7180000018544	59906	0.4155	0	52.1035	Eukaryota	37218.0	0	Chordata	37218.0	0	Carnivora	37218.0	0	Felidae	37218.0	0	Felis	37218.0	0	Felis catus	37218.0	0
scf7180000022719	16928	0.528	0	26.0685	Eukaryota	12643.0	0	Chordata	12643.0	0	Carnivora	12643.0	0	Felidae	3952.0	4	Neomonachus	2435.0	8	Neomonachus schauinslandi	2435.0	8
scf7180000023870	1066766	0.4322	0	52.0515	Eukaryota	45587.0	0	Chordata	45587.0	0	Carnivora	45587.0	0	Felidae	45587.0	0	Felis	45587.0	0	Felis catus	45587.0	0
scf7180000019950	1476330	0.4673	0	52.7309	Eukaryota	40186.0	0	Chordata	40186.0	0	Carnivora	40186.0	0	Felidae	22741.0	3	Felis	11266.0	7	Felis catus	11266.0	7
scf7180000021090	20058	0.519	0	81.1541	no-hit	0.0	0	no-hit	0.0	0	no-hit	0.0	0	no-hit	0.0	0	no-hit	0.0	0	no-hit	0.0	0
scf7180000023653	40733	0.3882	0	427.6471	Eukaryota	6143.0	0	Chordata	6143.0	0	Carnivora	6143.0	0	Felidae	6143.0	0	Felis	6143.0	0	Felis catus	6143.0	0
scf7180000020135	129953	0.443	0	25.9376	Eukaryota	21976.0	0	Chordata	21976.0	0	Carnivora	21976.0	0	Felidae	21976.0	0	Felis	19765.0	1	Felis catus	19765.0	1
scf7180000023947	963517	0.4129	0	50.8306	Eukaryota	44648.0	0	Chordata	44648.0	0	Carnivora	44648.0	0	Felidae	27602.0	2	Panthera	13802.0	4	Panthera pardus	9220.0	5
scf7180000020645	115437	0.4611	0	50.7839	Eukaryota	28001.0	0	Chordata	28001.0	0	Carnivora	28001.0	0	Felidae	28001.0	0	Felis	13559.0	3	Felis catus	13559.0	3
scf7180000017968	1608973	0.3719	0	50.0785	Eukaryota	47495.0	0	Chordata	47495.0	0	Carnivora	47495.0	0	Felidae	47495.0	0	Felis	47495.0	0	Felis catus	47495.0	0
scf7180000024061	298264	0.5876	0	50.9073	Eukaryota	25654.0	0	Chordata	25654.0	0	Carnivora	25654.0	0	Otariidae	25654.0	0	Callorhinus	12845.0	2	Callorhinus ursinus	12845.0	2
scf7180000020407	115467	0.3848	0	24.4117	Eukaryota	42803.0	0	Chordata	42803.0	0	Carnivora	42803.0	0	Felidae	42803.0	0	Felis	42803.0	0	Felis catus	42803.0	0
scf7180000019261	415573	0.4975	0	52.6805	Eukaryota	39778.0	0	Chordata	39778.0	0	Carnivora	39778.0	0	Felidae	14079.0	5	Suricata	9469.0	8	Suricata suricatta	9469.0	8
scf7180000022099	72647	0.403	0	25.6655	Eukaryota	43579.0	0	Chordata	43579.0	0	Carnivora	43579.0	0	Felidae	43579.0	0	Felis	43579.0	0	Felis catus	43579.0	0
scf7180000023804	2378379	0.417	0	51.9745	Eukaryota	64400.0	0	Chordata	64400.0	0	Carnivora	64400.0	0	Felidae	39076.0	3	Panthera	13071.0	8	Suricata suricatta	6647.0	9
scf7180000024179	118879	0.4603	0	51.6505	Eukaryota	14495.0	0	Chordata	14495.0	0	Carnivora	14495.0	0	Felidae	14495.0	0	Felis	10912.0	1	Felis catus	10912.0	1
scf7180000018694	1955875	0.4163	0	51.1722	Eukaryota	47642.0	0	Chordata	47642.0	0	Carnivora	47642.0	0	Felidae	47642.0	0	Felis	47642.0	0	Felis catus	47642.0	0
scf7180000017651	2138670	0.3895	0	50.837	Eukaryota	63965.0	0	Chordata	63965.0	0	Carnivora	38781.0	2	Ursidae	21164.0	5	Ailuropoda	21164.0	5	Ailuropoda melanoleuca	21164.0	5
scf7180000024183	59073	0.4005	0	25.4125	Eukaryota	16995.0	0	Chordata	16995.0	0	Primates	14701.0	1	Hominidae	7422.0	3	Chlorocebus	4434.0	5	Chlorocebus sabaeus	4434.0	5
scf7180000021875	91102	0.3672	0	26.1238	Eukaryota	45579.0	0	Chordata	45579.0	0	Carnivora	45579.0	0	Felidae	45579.0	0	Felis	45579.0	0	Felis catus	45579.0	0
scf7180000017661	3170902	0.4056	0	50.3343	Eukaryota	55700.0	0	Chordata	55700.0	0	Carnivora	55700.0	0	Felidae	55700.0	0	Felis	31613.0	2	Felis catus	31613.0	2
scf7180000021776	12245	0.5205	0	313.1057	no-hit	0.0	0	no-hit	0.0	0	no-hit	0.0	0	no-hit	0.0	0	no-hit	0.0	0	no-hit	0.0	0
scf7180000022122	28038	0.3749	0	23.3347	Eukaryota	33184.0	0	Chordata	33184.0	0	Carnivora	33184.0	0	Felidae	33184.0	0	Felis	29887.0	1	Felis catus	29887.0	1
scf7180000020683	98483	0.3863	0	25.2415	Eukaryota	28367.0	0	Chordata	28367.0	0	Carnivora	28367.0	0	Felidae	28367.0	0	Felis	25491.0	1	Felis catus	25491.0	1
scf7180000018872	511825	0.3694	0	50.0006	Eukaryota	45868.0	0	Chordata	45868.0	0	Carnivora	45868.0	0	Felidae	45868.0	0	Felis	45868.0	0	Felis catus	45868.0	0
scf7180000021689	1020707	0.5041	0	51.8631	Eukaryota	112804.0	0	Chordata	112804.0	0	Carnivora	112804.0	0	Felidae	61632.0	2	Felis	24728.0	5	Felis catus	24728.0	5
scf7180000020862	84717	0.4014	0	51.3461	Eukaryota	12031.0	0	Chordata	12031.0	0	Carnivora	12031.0	0	Felidae	12031.0	0	Felis	10850.0	1	Felis catus	10850.0	1
scf7180000021413	56225	0.4551	0	27.4371	Eukaryota	13755.0	0	Chordata	13755.0	0	Carnivora	13755.0	0	Felidae	13755.0	0	Felis	12377.0	1	Felis catus	12377.0	1
scf7180000021556	117017	0.5058	100	47.8453	Eukaryota	28347.0	0	Chordata	28347.0	0	Carnivora	20672.0	2	Felidae	9385.0	7	Panthera	3168.0	9	Panthera pardus	3168.0	9
scf7180000020946	11492	0.3804	0	33.8661	Eukaryota	2480.0	0	Chordata	2480.0	0	Carnivora	2480.0	0	Felidae	2480.0	0	Felis	2201.0	1	Felis catus	2201.0	1
scf7180000019243	12477	0.4526	0	26.0153	Eukaryota	12461.0	0	Chordata	12461.0	0	Carnivora	12461.0	0	Felidae	12461.0	0	Felis	11227.0	1	Felis catus	11227.0	1
scf7180000021279	61710	0.3857	0	25.3633	Eukaryota	42574.0	0	Chordata	42574.0	0	Carnivora	42574.0	0	Felidae	42574.0	0	Felis	42574.0	0	Felis catus	42574.0	0
scf7180000023681	102215	0.4074	0	775.1664	Eukaryota	30362.0	0	Chordata	30362.0	0	Carnivora	30362.0	0	Felidae	30362.0	0	Felis	30362.0	0	Felis catus	30362.0	0
scf7180000021001	74854	0.3834	0	25.9503	Eukaryota	11746.0	0	Chordata	11746.0	0	Carnivora	9962.0	1	Felidae	9962.0	1	Felis	8975.0	2	Felis catus	8975.0	2
scf7180000020873	79073	0.4364	0	26.8427	Eukaryota	46420.0	0	Chordata	46420.0	0	Carnivora	46420.0	0	Felidae	46420.0	0	Felis	46420.0	0	Felis catus	46420.0	0
scf7180000017640	1935070	0.4349	0	52.309	Eukaryota	95805.0	0	Chordata	95805.0	0	Carnivora	95805.0	0	Felidae	95805.0	0	Panthera	47750.0	2	Panthera pardus	47750.0	2
scf7180000020173	135815	0.3796	0	50.6366	Eukaryota	29887.0	0	Chordata	29887.0	0	Carnivora	29887.0	0	Felidae	29887.0	0	Felis	29887.0	0	Felis catus	29887.0	0
scf7180000022330	13924	0.456	0	138.6528	Eukaryota	5552.0	0	Chordata	5552.0	0	Carnivora	5552.0	0	Felidae	5552.0	0	Felis	5552.0	0	Felis catus	5552.0	0
scf7180000017642	537239	0.4237	0	50.8797	Eukaryota	43128.0	0	Chordata	43128.0	0	Carnivora	43128.0	0	Felidae	43128.0	0	Felis	43128.0	0	Felis catus	43128.0	0
scf7180000020425	16545	0.445	0	57.2407	Eukaryota	3401.0	0	Chordata	3401.0	0	Carnivora	3401.0	0	Felidae	2577.0	1	Felis	1941.0	2	Felis catus	1941.0	2
scf7180000023899	1664876	0.3818	0	49.1667	Eukaryota	45776.0	0	Chordata	45776.0	0	Carnivora	45776.0	0	Felidae	45776.0	0	Felis	45776.0	0	Felis catus	45776.0	0
scf7180000022106	19416	0.3706	0	206.7066	Eukaryota	12382.0	0	Chordata	12382.0	0	Carnivora	12382.0	0	Felidae	12382.0	0	Felis	11159.0	1	Felis catus	11159.0	1
scf7180000017858	19985	0.4007	0	32.4155	Eukaryota	19058.0	0	Chordata	19058.0	0	Carnivora	19058.0	0	Felidae	19058.0	0	Felis	17141.0	1	Felis catus	17141.0	1
scf7180000018558	8113	0.4307	0	23.0322	Eukaryota	5818.0	0	Chordata	5818.0	0	Carnivora	5818.0	0	Felidae	5818.0	0	Felis	5818.0	0	Felis catus	5818.0	0
scf7180000021828	61947	0.4807	0	54.1763	Eukaryota	8382.0	0	Chordata	8382.0	0	Carnivora	8382.0	0	Felidae	8382.0	0	Felis	6716.0	1	Felis catus	6716.0	1
scf7180000020843	90122	0.4144	0	23.2731	Eukaryota	7155.0	0	Chordata	7155.0	0	Primates	3238.0	2	Hominidae	3238.0	2	Felis	2579.0	3	Felis catus	2579.0	3
scf7180000017748	1810933	0.3747	0	49.8723	Eukaryota	54150.0	0	Chordata	54150.0	0	Carnivora	54150.0	0	Felidae	54150.0	0	Panthera	54150.0	0	Panthera pardus	54150.0	0
scf7180000021007	71840	0.3882	0	25.1149	Eukaryota	28740.0	0	Chordata	28740.0	0	Carnivora	28740.0	0	Felidae	28740.0	0	Felis	25796.0	1	Felis catus	25796.0	1
scf7180000020517	24094	0.6199	0	28.1354	Eukaryota	6406.0	0	Chordata	6406.0	0	Carnivora	6406.0	0	Felidae	6406.0	0	Acinonyx	3847.0	3	Acinonyx jubatus	3847.0	3
scf7180000019400	74338	0.4154	0	26.3568	Eukaryota	46065.0	0	Chordata	46065.0	0	Carnivora	46065.0	0	Herpestidae	23235.0	1	Suricata	23235.0	1	Suricata suricatta	23235.0	1
scf7180000021963	43014	0.3915	0	45.3664	Eukaryota	35689.0	0	Chordata	35689.0	0	Carnivora	35689.0	0	Felidae	35689.0	0	Felis	32110.0	1	Felis catus	32110.0	1
scf7180000021606	52294	0.3939	0	25.3205	Eukaryota	31891.0	0	Chordata	31891.0	0	Carnivora	31891.0	0	Felidae	31891.0	0	Felis	28622.0	1	Felis catus	28622.0	1
scf7180000019555	269515	0.619	0	49.7084	Eukaryota	22347.0	0	Chordata	22347.0	0	Carnivora	22347.0	0	Felidae	22347.0	0	Panthera	13453.0	3	Panthera pardus	13453.0	3
scf7180000024178	45697	0.4535	0	46.4968	Eukaryota	22827.0	0	Chordata	22827.0	0	Carnivora	22827.0	0	Canidae	20400.0	1	Canis	18100.0	2	Canis lupus	18100.0	2
scf7180000018508	507884	0.3653	0	47.773	Eukaryota	39715.0	0	Chordata	39715.0	0	Carnivora	39715.0	0	Felidae	39715.0	0	Felis	39715.0	0	Felis catus	39715.0	0
scf7180000023271	21197	0.3723	0	149.4417	Eukaryota	44355.0	0	Chordata	44355.0	0	Carnivora	44355.0	0	Felidae	44355.0	0	Felis	44355.0	0	Felis catus	44355.0	0
scf7180000019183	530494	0.3642	0	48.3579	Eukaryota	20769.0	0	Chordata	20769.0	0	Carnivora	20769.0	0	Felidae	20769.0	0	Felis	18682.0	1	Felis catus	18682.0	1
scf7180000021196	78902	0.4343	0	25.5458	Eukaryota	20931.0	0	Chordata	20931.0	0	Carnivora	20931.0	0	Felidae	15030.0	2	Felis	4316.0	5	Felis catus	4316.0	6
scf7180000019087	387618	0.4094	0	49.8895	Eukaryota	42512.0	0	Chordata	42512.0	0	Carnivora	42512.0	0	Felidae	42512.0	0	Felis	42512.0	0	Felis catus	42512.0	0
scf7180000023840	403674	0.4376	0	52.1779	Eukaryota	57613.0	0	Chordata	57613.0	0	Carnivora	57613.0	0	Felidae	57613.0	0	Felis	57613.0	0	Felis catus	57613.0	0
scf7180000019977	152649	0.3702	0	28.7927	Eukaryota	47182.0	0	Chordata	47182.0	0	Carnivora	47182.0	0	Felidae	47182.0	0	Felis	47182.0	0	Felis catus	47182.0	0
scf7180000018243	72719	0.3932	0	24.9304	Eukaryota	46504.0	0	Chordata	46504.0	0	Carnivora	46504.0	0	Felidae	46504.0	0	Felis	46504.0	0	Felis catus	46504.0	0
scf7180000023197	64876	0.3871	0	300.7498	Eukaryota	46128.0	0	Chordata	46128.0	0	Carnivora	46128.0	0	Felidae	46128.0	0	Felis	46128.0	0	Felis catus	46128.0	0
scf7180000017529	2083815	0.3755	0	50.7341	Eukaryota	47101.0	0	Chordata	47101.0	0	Carnivora	47101.0	0	Felidae	47101.0	0	Felis	47101.0	0	Felis catus	47101.0	0
scf7180000019370	665068	0.4116	0	49.6901	Eukaryota	46456.0	0	Chordata	46456.0	0	Carnivora	46456.0	0	Felidae	46456.0	0	Felis	46456.0	0	Felis catus	46456.0	0
scf7180000021580	35579	0.394	0	24.2252	Eukaryota	14308.0	0	Chordata	14308.0	0	Carnivora	14308.0	0	Felidae	14308.0	0	Felis	12847.0	1	Felis catus	12847.0	1
scf7180000020727	97139	0.3869	0	29.5209	Eukaryota	49365.0	0	Chordata	49365.0	0	Carnivora	49365.0	0	Felidae	49365.0	0	Felis	44399.0	1	Felis catus	44399.0	1
scf7180000021318	5545	0.4575	0	23.7678	Eukaryota	6960.0	0	Chordata	6960.0	0	Carnivora	6211.0	1	Felidae	6053.0	2	Felis	4184.0	5	Felis catus	4184.0	5
scf7180000019357	24883	0.55	0	266.2114	Eukaryota	7162.0	0	Chordata	7162.0	0	Carnivora	7162.0	0	Felidae	6239.0	2	Felis	2589.0	4	Felis catus	2589.0	4
scf7180000022333	22775	0.4177	0	22.8534	Eukaryota	10652.0	0	Chordata	10652.0	0	Artiodactyla	9143.0	1	Bovidae	9143.0	1	Ovis	9143.0	1	Ovis canadensis	9143.0	1
scf7180000019610	3453220	0.4023	0	50.4107	Eukaryota	47137.0	0	Chordata	47137.0	0	Carnivora	47137.0	0	Felidae	37253.0	1	Felis	37253.0	1	Felis catus	37253.0	1
scf7180000019389	57324	0.5264	0	317.5726	Eukaryota	12423.0	0	Chordata	12423.0	0	Carnivora	12423.0	0	Felidae	12423.0	0	Felis	12423.0	0	Felis catus	12423.0	0
scf7180000018971	643537	0.4603	0	51.5234	Eukaryota	36493.0	0	Chordata	36493.0	0	Carnivora	36493.0	0	Felidae	30240.0	1	Felis	30240.0	1	Felis catus	30240.0	1
scf7180000018513	713164	0.3873	0	49.6397	Eukaryota	47576.0	0	Chordata	47576.0	0	Carnivora	47576.0	0	Felidae	47576.0	0	Felis	47576.0	0	Felis catus	47576.0	0
scf7180000017507	3869470	0.3754	0	50.8143	Eukaryota	61000.0	0	Chordata	61000.0	0	Carnivora	61000.0	0	Felidae	61000.0	0	Felis	61000.0	0	Felis catus	61000.0	0
scf7180000022222	17172	0.6438	0	50.5818	Eukaryota	3202.0	0	Chordata	3202.0	0	Carnivora	3202.0	0	Felidae	2950.0	1	Felis	2232.0	3	Felis catus	2232.0	3
scf7180000017698	3049275	0.3609	0	50.1103	Eukaryota	47904.0	0	Chordata	47904.0	0	Carnivora	47904.0	0	Felidae	47904.0	0	Felis	47904.0	0	Felis catus	47904.0	0
scf7180000020470	123433	0.421	0	53.4172	Eukaryota	18228.0	0	Chordata	18228.0	0	Primates	9141.0	1	Hominidae	9141.0	1	Felis	9087.0	2	Felis catus	9087.0	2
scf7180000021636	59198	0.4444	0	24.7025	Eukaryota	6828.0	0	Chordata	6828.0	0	Primates	4483.0	3	Hominidae	4483.0	3	Pan	2157.0	5	Pan troglodytes	2157.0	5
scf7180000018017	3672147	0.3628	0	49.6029	Eukaryota	46821.0	0	Chordata	46821.0	0	Carnivora	46821.0	0	Felidae	46821.0	0	Felis	46821.0	0	Felis catus	46821.0	0
scf7180000021610	38495	0.3638	0	24.0682	Eukaryota	32973.0	0	Chordata	32973.0	0	Carnivora	32973.0	0	Felidae	32973.0	0	Felis	32973.0	0	Felis catus	32973.0	0
scf7180000020861	67953	0.4054	0	25.9342	Eukaryota	20750.0	0	Chordata	20750.0	0	Carnivora	8495.0	2	Felidae	8495.0	2	Felis	7216.0	3	Felis catus	7216.0	3
scf7180000018097	78301	0.3864	0	49.5794	Eukaryota	38114.0	0	Chordata	38114.0	0	Carnivora	38114.0	0	Felidae	24799.0	2	Acinonyx	12435.0	5	Acinonyx jubatus	12435.0	5
scf7180000022136	31420	0.3862	0	24.1038	Eukaryota	36803.0	0	Chordata	36803.0	0	Carnivora	36803.0	0	Felidae	36803.0	0	Felis	33105.0	1	Felis catus	33105.0	1
scf7180000021263	73890	0.403	0	27.3992	Eukaryota	51235.0	0	Chordata	51235.0	0	Carnivora	51235.0	0	Felidae	30216.0	2	Lynx	16318.0	5	Lynx canadensis	16318.0	5
scf7180000021622	8145	0.6268	0	33.3187	Eukaryota	4225.0	0	Chordata	4225.0	0	Crocodylia	843.0	7	unresolved	427.0	9	unresolved	427.0	9	unresolved	427.0	9
scf7180000023262	17343	0.4263	0	384.6817	Eukaryota	131834.0	0	Chordata	131834.0	0	Carnivora	131834.0	0	Hyaenidae	131834.0	0	Proteles	79231.0	1	Proteles cristata	79231.0	1
scf7180000017758	1654680	0.3978	0	49.7283	Eukaryota	45647.0	0	Chordata	45647.0	0	Carnivora	45647.0	0	Felidae	45647.0	0	Felis	45647.0	0	Felis catus	45647.0	0
scf7180000018897	529764	0.4926	0	50.1207	Eukaryota	10012.0	0	Chordata	10012.0	0	Carnivora	10012.0	0	Felidae	10012.0	0	Felis	9016.0	1	Felis catus	9016.0	1
scf7180000024141	178149	0.4229	0	49.8575	Eukaryota	6586.0	0	Chordata	6586.0	0	Carnivora	6586.0	0	Felidae	6586.0	0	Felis	5939.0	1	Felis catus	5939.0	1
scf7180000020979	8557	0.596	0	27.7809	no-hit	0.0	0	no-hit	0.0	0	no-hit	0.0	0	no-hit	0.0	0	no-hit	0.0	0	no-hit	0.0	0
scf7180000023999	590764	0.3555	0	51.2036	Eukaryota	46090.0	0	Chordata	46090.0	0	Carnivora	46090.0	0	Felidae	46090.0	0	Felis	46090.0	0	Felis catus	46090.0	0
scf7180000019023	484568	0.364	0	49.599	Eukaryota	46506.0	0	Chordata	46506.0	0	Carnivora	46506.0	0	Felidae	46506.0	0	Felis	41885.0	1	Felis catus	41885.0	1
scf7180000021540	71123	0.4343	0	26.8731	Eukaryota	44492.0	0	Chordata	44492.0	0	Carnivora	44492.0	0	Felidae	38870.0	1	Felis	34600.0	2	Felis catus	34600.0	2
scf7180000019713	200972	0.4478	0	26.9452	Eukaryota	12235.0	0	Chordata	12235.0	0	Carnivora	10979.0	1	Felidae	8536.0	3	Felis	8536.0	3	Felis catus	8536.0	3
scf7180000021205	56464	0.4143	0	38.4632	Eukaryota	36661.0	0	Chordata	36661.0	0	Carnivora	36661.0	0	Felidae	36661.0	0	Felis	36661.0	0	Felis catus	36661.0	0
scf7180000018357	850857	0.3978	0	51.2139	Eukaryota	74058.0	0	Chordata	74058.0	0	Carnivora	74058.0	0	Felidae	24260.0	4	Suricata	15441.0	8	Suricata suricatta	15441.0	8
scf7180000021134	76183	0.3787	0	51.5458	Eukaryota	16378.0	0	Chordata	16378.0	0	Carnivora	16378.0	0	Felidae	11800.0	1	Panthera	7000.0	4	Panthera pardus	4752.0	5
scf7180000023207	25945	0.5383	0	288.0202	Eukaryota	22118.0	0	Chordata	22118.0	0	Carnivora	22118.0	0	Felidae	22118.0	0	Felis	19885.0	1	Felis catus	19885.0	1
scf7180000017660	1978249	0.5011	0	52.0661	Eukaryota	40741.0	0	Chordata	40741.0	0	Carnivora	40741.0	0	Canidae	20135.0	3	Canis	12040.0	4	Canis lupus	12040.0	4
scf7180000018520	959425	0.4165	0	52.4295	Eukaryota	46939.0	0	Chordata	46939.0	0	Carnivora	46939.0	0	Felidae	46939.0	0	Felis	42322.0	1	Felis catus	42322.0	1
scf7180000018531	726640	0.4335	0	51.2255	Eukaryota	40109.0	0	Chordata	40109.0	0	Carnivora	40109.0	0	Felidae	40109.0	0	Felis	35383.0	1	Felis catus	35383.0	1
scf7180000019265	325138	0.4594	0	55.3013	Eukaryota	36051.0	0	Chordata	36051.0	0	Carnivora	26183.0	1	Felidae	26183.0	2	Lynx	7854.0	5	Lynx canadensis	7854.0	6
scf7180000021357	39509	0.3836	0	23.6165	Eukaryota	33381.0	0	Chordata	33381.0	0	Carnivora	33381.0	0	Felidae	33381.0	0	Felis	24109.0	3	Felis catus	24109.0	3
scf7180000024224	33977	0.4159	0	26.0558	Eukaryota	5367.0	0	Chordata	5367.0	0	Primates	2075.0	3	Hominidae	2075.0	3	Felis	1950.0	4	Felis catus	1950.0	4
scf7180000017448	272749	0.4174	0	49.9647	Eukaryota	44902.0	0	Chordata	44902.0	0	Carnivora	44902.0	0	Felidae	35358.0	1	Felis	30973.0	2	Felis catus	30973.0	2
scf7180000022865	150351	0.4569	0	574.2728	Eukaryota	31868.0	0	Chordata	31868.0	0	Carnivora	31868.0	0	Felidae	31868.0	0	Felis	31868.0	0	Felis catus	31868.0	0
scf7180000024006	573033	0.5117	0	51.2609	Eukaryota	44011.0	0	Chordata	44011.0	0	Carnivora	44011.0	0	Felidae	44011.0	0	Felis	44011.0	0	Felis catus	44011.0	0
scf7180000022509	14405	0.3741	0	22.6192	Eukaryota	26748.0	0	Chordata	26748.0	0	Carnivora	26748.0	0	Felidae	26748.0	0	Felis	20359.0	1	Felis catus	20359.0	1
scf7180000020118	130749	0.4567	0	24.7414	Eukaryota	28462.0	0	Chordata	28462.0	0	Carnivora	28462.0	0	Felidae	8932.0	5	Panthera	8932.0	5	Panthera pardus	8932.0	5
scf7180000018396	745820	0.4923	0	52.8328	Eukaryota	46996.0	0	Chordata	46996.0	0	Carnivora	46996.0	0	Felidae	46996.0	0	Felis	46996.0	0	Felis catus	46996.0	0
scf7180000020610	6235	0.4223	0	56.6247	Eukaryota	2126.0	0	Chordata	2126.0	0	Carnivora	2126.0	0	Felidae	2126.0	0	Felis	1503.0	1	Felis catus	1503.0	1
scf7180000019571	433114	0.5661	0	49.0558	Eukaryota	10796.0	0	Chordata	10796.0	0	Primates	5246.0	4	Hominidae	4627.0	6	Homo	4627.0	6	Homo sapiens	4627.0	6
scf7180000018468	105833	0.3702	0	50.5703	Eukaryota	36950.0	0	Chordata	36950.0	0	Carnivora	36950.0	0	Felidae	36950.0	0	Felis	36950.0	0	Felis catus	36950.0	0
scf7180000020810	72562	0.5378	0	50.0268	Eukaryota	5077.0	0	Chordata	5077.0	0	Carnivora	5077.0	0	Felidae	5077.0	0	Felis	4552.0	1	Felis catus	4552.0	1
scf7180000018103	1465102	0.3595	0	49.6709	Eukaryota	50997.0	0	Chordata	50997.0	0	Carnivora	50997.0	0	Felidae	50997.0	0	Felis	50997.0	0	Felis catus	50997.0	0
scf7180000018244	675589	0.3559	0	49.4548	Eukaryota	46678.0	0	Chordata	46678.0	0	Carnivora	46678.0	0	Felidae	46678.0	0	Felis	46678.0	0	Felis catus	46678.0	0
scf7180000019567	284252	0.4371	0	47.6162	Eukaryota	38686.0	0	Chordata	38686.0	0	Carnivora	38686.0	0	Felidae	38686.0	0	Panthera	20410.0	1	Panthera tigris	20410.0	1
scf7180000022426	21104	0.3636	0	25.4428	Eukaryota	8893.0	0	Chordata	8893.0	0	Primates	4481.0	3	Hominidae	4481.0	3	Homo	4481.0	3	Homo sapiens	4481.0	3
scf7180000020905	65534	0.3823	0	25.3808	Eukaryota	19195.0	0	Chordata	19195.0	0	Carnivora	19195.0	0	Felidae	19195.0	0	Felis	19195.0	0	Felis catus	19195.0	0
scf7180000017803	1610790	0.3464	0	48.4916	Eukaryota	44981.0	0	Chordata	44981.0	0	Carnivora	44981.0	0	Felidae	44981.0	0	Felis	44981.0	0	Felis catus	44981.0	0
scf7180000023300	44126	0.4041	0	130.8663	Eukaryota	12954.0	0	Chordata	12954.0	0	Carnivora	12954.0	0	Felidae	12954.0	0	Felis	10392.0	1	Felis catus	10392.0	1
scf7180000022260	78423	0.4269	0	1014.5293	no-hit	0.0	0	no-hit	0.0	0	no-hit	0.0	0	no-hit	0.0	0	no-hit	0.0	0	no-hit	0.0	0
scf7180000019443	276729	0.423	0	24.8433	Eukaryota	21968.0	0	Chordata	21968.0	0	Carnivora	21968.0	0	Felidae	21968.0	0	Felis	19759.0	1	Felis catus	19759.0	1
scf7180000023507	45530	0.4862	0	631.9142	no-hit	0.0	0	no-hit	0.0	0	no-hit	0.0	0	no-hit	0.0	0	no-hit	0.0	0	no-hit	0.0	0
scf7180000023749	18789	0.4314	0	493.7233	no-hit	0.0	0	no-hit	0.0	0	no-hit	0.0	0	no-hit	0.0	0	no-hit	0.0	0	no-hit	0.0	0
scf7180000018203	506035	0.372	0	49.1067	Eukaryota	47259.0	0	Chordata	47259.0	0	Carnivora	47259.0	0	Felidae	47259.0	0	Felis	47259.0	0	Felis catus	47259.0	0
scf7180000020986	17014	0.5219	0	259.6	no-hit	0.0	0	no-hit	0.0	0	no-hit	0.0	0	no-hit	0.0	0	no-hit	0.0	0	no-hit	0.0	0
scf7180000021934	9191	0.3751	0	24.4777	Eukaryota	4128.0	0	Chordata	4128.0	0	Carnivora	1812.0	3	Hominidae	1397.0	4	Felis	1112.0	5	Felis catus	1112.0	5
scf7180000019368	426715	0.3682	0	50.6441	Eukaryota	47054.0	0	Chordata	47054.0	0	Carnivora	47054.0	0	Felidae	47054.0	0	Felis	47054.0	0	Felis catus	47054.0	0
scf7180000021049	111566	0.3926	0	49.6665	Eukaryota	17779.0	0	Chordata	17779.0	0	Carnivora	17779.0	0	Felidae	17779.0	0	Felis	15806.0	1	Felis catus	15806.0	1
scf7180000021668	14785	0.5213	0	231.4689	no-hit	0.0	0	no-hit	0.0	0	no-hit	0.0	0	no-hit	0.0	0	no-hit	0.0	0	no-hit	0.0	0
scf7180000019033	100703	0.4595	0	41.6395	Eukaryota	17173.0	0	Chordata	17173.0	0	Carnivora	16297.0	1	Felidae	16297.0	1	Lynx	7131.0	4	Lynx canadensis	7131.0	4
scf7180000021010	31540	0.3962	0	25.2676	Eukaryota	45788.0	0	Chordata	45788.0	0	Carnivora	45788.0	0	Felidae	45788.0	0	Felis	45788.0	0	Felis catus	45788.0	0
scf7180000020264	25652	0.6981	0	140.7537	no-hit	0.0	0	no-hit	0.0	0	no-hit	0.0	0	no-hit	0.0	0	no-hit	0.0	0	no-hit	0.0	0
scf7180000020787	83430	0.4135	0	25.5003	Eukaryota	15744.0	0	Chordata	15744.0	0	Artiodactyla	9721.0	1	Suidae	5027.0	5	Sus	5027.0	7	Sus scrofa	5027.0	7
scf7180000018410	758205	0.3486	0	47.4498	Eukaryota	44981.0	0	Chordata	44981.0	0	Carnivora	44981.0	0	Felidae	44981.0	0	Felis	40685.0	1	Felis catus	40685.0	1
scf7180000024170	137713	0.3857	0	25.9695	Eukaryota	18037.0	0	Chordata	18037.0	0	Carnivora	18037.0	0	Felidae	18037.0	0	Felis	14432.0	1	Felis catus	14432.0	1
scf7180000020696	109158	0.4862	0	49.7033	Eukaryota	9044.0	0	Chordata	9044.0	0	Carnivora	9044.0	0	Felidae	9044.0	0	Felis	8211.0	1	Felis catus	8211.0	1
scf7180000018281	6641	0.435	0	22.7894	Eukaryota	2548.0	0	Chordata	2548.0	0	Carnivora	1988.0	2	Felidae	1988.0	2	Felis	1242.0	3	Felis catus	1242.0	3
scf7180000019895	221108	0.5787	0	51.466	Eukaryota	29237.0	0	Chordata	29237.0	0	Carnivora	26527.0	1	Felidae	14985.0	4	Panthera	5936.0	7	Panthera pardus	5936.0	8
scf7180000020564	114859	0.3702	0	24.2996	Eukaryota	33655.0	0	Chordata	33655.0	0	Carnivora	33655.0	0	Felidae	33655.0	0	Felis	33655.0	0	Felis catus	33655.0	0
scf7180000018662	819201	0.3702	0	48.5136	Eukaryota	47421.0	0	Chordata	47421.0	0	Carnivora	47421.0	0	Felidae	47421.0	0	Felis	47421.0	0	Felis catus	47421.0	0
scf7180000019623	276857	0.4015	0	53.4803	Eukaryota	45747.0	0	Chordata	45747.0	0	Carnivora	45747.0	0	Felidae	45747.0	0	Felis	41167.0	1	Felis catus	41167.0	1
scf7180000019189	415117	0.4013	0	50.6898	Eukaryota	20588.0	0	Chordata	20588.0	0	Carnivora	20588.0	0	Felidae	20588.0	0	Felis	18569.0	1	Felis catus	18569.0	1
scf7180000021558	1975545	0.4181	0	51.296	Eukaryota	92035.0	0	Chordata	92035.0	0	Carnivora	92035.0	0	Felidae	92035.0	0	Panthera	36952.0	2	Panthera pardus	36952.0	2
scf7180000024096	169420	0.3748	0	49.3563	Eukaryota	16426.0	0	Chordata	16426.0	0	Carnivora	16426.0	0	Felidae	16426.0	0	Felis	13163.0	1	Felis catus	13163.0	1
scf7180000021485	26580	0.4452	0	26.3932	Eukaryota	7593.0	0	Chordata	7593.0	0	Primates	4125.0	5	Hominidae	4125.0	5	Homo	2070.0	6	Homo sapiens	2070.0	6
scf7180000019731	193056	0.5259	0	46.8801	Eukaryota	39981.0	0	Chordata	39981.0	0	Carnivora	21684.0	2	Felidae	13594.0	4	Felis	8498.0	6	Felis catus	8498.0	7
scf7180000018682	618833	0.4254	0	50.7874	Eukaryota	44190.0	0	Chordata	44190.0	0	Carnivora	44190.0	0	Felidae	44190.0	0	Felis	39820.0	1	Felis catus	39820.0	1
scf7180000018718	618654	0.432	0	52.9498	Eukaryota	29701.0	0	Chordata	29701.0	0	Carnivora	29701.0	0	Felidae	26360.0	1	Panthera	11464.0	3	Felis catus	9658.0	4
scf7180000022974	59936	0.5524	0	182.6745	Eukaryota	13715.0	0	Chordata	13715.0	0	Carnivora	13715.0	0	Felidae	13715.0	0	Felis	13715.0	0	Felis catus	13715.0	0
scf7180000020496	20970	0.5159	0	234.8627	Eukaryota	12236.0	0	Chordata	12236.0	0	Carnivora	12236.0	0	Felidae	12236.0	0	Felis	11024.0	1	Felis catus	11024.0	1
scf7180000020242	141273	0.4674	0	52.7911	Eukaryota	25584.0	0	Chordata	25584.0	0	Carnivora	25584.0	0	Felidae	9101.0	4	Canis	3800.0	8	Canis lupus	3800.0	8
scf7180000018784	218878	0.3471	0	43.3695	Eukaryota	46546.0	0	Chordata	46546.0	0	Carnivora	46546.0	0	Felidae	46546.0	0	Felis	46546.0	0	Felis catus	46546.0	0
scf7180000019181	419114	0.41	0	50.6558	Eukaryota	54503.0	0	Chordata	54503.0	0	Carnivora	54503.0	0	Felidae	54503.0	0	Panthera	22240.0	3	Panthera pardus	22240.0	3
scf7180000020318	186781	0.491	0	51.5974	Eukaryota	17300.0	0	Chordata	17300.0	0	Carnivora	17300.0	0	Herpestidae	9210.0	1	Suricata	9210.0	5	Suricata suricatta	9210.0	5
scf7180000017928	2136956	0.479	0	51.7455	Eukaryota	51126.0	0	Chordata	51126.0	0	Carnivora	51126.0	0	Felidae	51126.0	0	Panthera	51126.0	0	Panthera pardus	35776.0	1
scf7180000020624	81946	0.4504	0	71.4122	Eukaryota	35505.0	0	Chordata	35505.0	0	Carnivora	35505.0	0	Felidae	32400.0	1	Felis	25762.0	3	Felis catus	25762.0	3
scf7180000021468	38181	0.3898	0	24.6745	Eukaryota	41949.0	0	Chordata	41949.0	0	Carnivora	41949.0	0	Felidae	41949.0	0	Felis	41949.0	0	Felis catus	41949.0	0
scf7180000019871	194627	0.4243	0	51.3231	Eukaryota	23747.0	0	Chordata	23747.0	0	Carnivora	23747.0	0	Felidae	23747.0	0	Felis	21349.0	1	Felis catus	21349.0	1
scf7180000017697	2115090	0.3754	0	50.7904	Eukaryota	52708.0	0	Chordata	52708.0	0	Carnivora	52708.0	0	Felidae	32060.0	1	Acinonyx	32060.0	1	Acinonyx jubatus	32060.0	1
scf7180000018419	57743	0.4072	0	26.1843	Eukaryota	36064.0	0	Chordata	36064.0	0	Carnivora	36064.0	0	Felidae	24399.0	2	Felis	14270.0	5	Felis catus	14270.0	6
scf7180000022899	634865	0.3579	0	50.1043	Eukaryota	47526.0	0	Chordata	47526.0	0	Carnivora	47526.0	0	Felidae	47526.0	0	Felis	47526.0	0	Felis catus	47526.0	0
scf7180000022605	13442	0.3427	0	23.1994	Eukaryota	4577.0	0	Chordata	4577.0	0	Primates	2033.0	2	Hominidae	2033.0	2	Homo	2033.0	2	Homo sapiens	2033.0	2
scf7180000019621	296364	0.3922	100	52.5425	Eukaryota	47453.0	0	Chordata	47453.0	0	Carnivora	47453.0	0	Felidae	47453.0	0	Felis	47453.0	0	Felis catus	47453.0	0
scf7180000024142	149189	0.4216	0	25.6142	Eukaryota	43943.0	0	Chordata	43943.0	0	Carnivora	43943.0	0	Felidae	43943.0	0	Felis	39584.0	1	Felis catus	39584.0	1
scf7180000021380	40613	0.5951	0	49.2063	Eukaryota	3954.0	0	Chordata	3954.0	0	Carnivora	3954.0	0	Felidae	1233.0	3	Zalophus	1089.0	6	Zalophus californianus	1089.0	6
scf7180000018537	989013	0.4006	0	50.8014	Eukaryota	46082.0	0	Chordata	46082.0	0	Carnivora	46082.0	0	Felidae	46082.0	0	Felis	46082.0	0	Felis catus	46082.0	0
scf7180000022323	19673	0.3684	0	24.2553	Eukaryota	6299.0	0	Chordata	6299.0	0	Primates	3410.0	3	Hominidae	3410.0	4	Homo	2276.0	6	Homo sapiens	2276.0	6
scf7180000024181	73478	0.5262	0	43.4968	Eukaryota	6703.0	0	Chordata	6703.0	0	Passeriformes	2916.0	3	Corvidae	2916.0	3	Aphelocoma	2916.0	3	Sus scrofa	2062.0	5
scf7180000020859	123785	0.4092	0	26.3702	Eukaryota	16844.0	0	Chordata	16844.0	0	Carnivora	9190.0	2	Felidae	7474.0	3	Equus	5868.0	5	Equus caballus	5868.0	6
scf7180000020430	113672	0.4331	0	25.2566	Eukaryota	15805.0	0	Chordata	15805.0	0	Primates	12271.0	3	Hominidae	11469.0	4	Homo	7645.0	5	Homo sapiens	7645.0	5
scf7180000024122	156882	0.3838	0	48.9577	Eukaryota	47480.0	0	Chordata	47480.0	0	Carnivora	47480.0	0	Felidae	47480.0	0	Felis	47480.0	0	Felis catus	47480.0	0
scf7180000019231	77277	0.428	0	24.7811	Eukaryota	4585.0	0	Chordata	4585.0	0	Primates	3494.0	2	Hominidae	3494.0	2	Homo	3019.0	3	Homo sapiens	3019.0	3
scf7180000019000	754797	0.3446	0	48.1098	Eukaryota	45742.0	0	Chordata	45742.0	0	Carnivora	45742.0	0	Felidae	45742.0	0	Felis	45742.0	0	Felis catus	45742.0	0
scf7180000020300	19321	0.5165	0	28.3352	Eukaryota	2693.0	0	Chordata	2693.0	0	Carnivora	2693.0	0	Felidae	2693.0	0	Felis	1935.0	1	Felis catus	1935.0	1
scf7180000023951	533997	0.3793	0	251.0183	Eukaryota	45273.0	0	Chordata	45273.0	0	Carnivora	45273.0	0	Felidae	45273.0	0	Felis	45273.0	0	Felis catus	45273.0	0
scf7180000023965	417229	0.5768	0	48.6578	Eukaryota	13954.0	0	Chordata	13954.0	0	Carnivora	9175.0	2	Felidae	9175.0	2	Felis	4017.0	5	Felis catus	4017.0	5
scf7180000020951	57637	0.396	0	26.941	Eukaryota	10344.0	0	Chordata	10344.0	0	Carnivora	10344.0	0	Otariidae	4811.0	3	Zalophus	2904.0	5	Zalophus californianus	2904.0	6
scf7180000019771	239047	0.5364	0	50.1264	Eukaryota	16031.0	0	Chordata	16031.0	0	Carnivora	16031.0	0	Felidae	16031.0	0	Felis	6410.0	2	Felis catus	6410.0	2
scf7180000021284	81700	0.3928	0	26.0463	Eukaryota	29245.0	0	Chordata	29245.0	0	Carnivora	29245.0	0	Felidae	29245.0	0	Felis	26247.0	1	Felis catus	26247.0	1
scf7180000019721	194426	0.631	0	53.3359	Eukaryota	33250.0	0	Chordata	33250.0	0	Carnivora	33250.0	0	Felidae	33250.0	0	Felis	20082.0	2	Felis catus	20082.0	2
scf7180000019085	31682	0.5474	0	141.6574	Eukaryota	6405.0	0	Chordata	6405.0	0	Carnivora	6405.0	0	Felidae	6166.0	1	Felis	1836.0	6	Felis catus	1836.0	6
scf7180000020917	63121	0.4153	0	50.8651	Eukaryota	30276.0	0	Chordata	30276.0	0	Carnivora	30276.0	0	Felidae	20353.0	2	Panthera	11265.0	4	Panthera pardus	11265.0	4
scf7180000018940	118593	0.3503	0	46.9542	Eukaryota	34284.0	0	Chordata	34284.0	0	Carnivora	34284.0	0	Felidae	34284.0	0	Felis	34284.0	0	Felis catus	34284.0	0
scf7180000019553	324178	0.3947	0	52.0302	Eukaryota	47015.0	0	Chordata	47015.0	0	Carnivora	47015.0	0	Felidae	47015.0	0	Felis	47015.0	0	Felis catus	47015.0	0
scf7180000019074	353751	0.3759	0	50.6093	Eukaryota	26532.0	0	Chordata	26532.0	0	Carnivora	14000.0	2	Hominidae	7314.0	5	Homo	7314.0	7	Homo sapiens	7314.0	7
scf7180000018521	226515	0.3856	0	51.1182	Eukaryota	46015.0	0	Chordata	46015.0	0	Carnivora	46015.0	0	Felidae	46015.0	0	Felis	46015.0	0	Felis catus	46015.0	0
scf7180000019545	341517	0.6327	100	51.1683	Eukaryota	24290.0	0	Chordata	24290.0	0	Carnivora	24290.0	0	Felidae	19545.0	2	Acinonyx	11975.0	5	Acinonyx jubatus	11975.0	5
scf7180000020870	85314	0.4127	0	24.898	Eukaryota	30928.0	0	Chordata	30928.0	0	Carnivora	30928.0	0	Felidae	24638.0	1	Felis	18354.0	2	Felis catus	18354.0	2
scf7180000019259	381048	0.4764	0	51.0527	Eukaryota	25583.0	0	Chordata	25583.0	0	Carnivora	13593.0	3	Delphinidae	7378.0	5	Odobenus	4634.0	8	Odobenus rosmarus	4634.0	8
scf7180000018724	218854	0.3674	0	49.3566	Eukaryota	48445.0	0	Chordata	48445.0	0	Carnivora	48445.0	0	Felidae	48445.0	0	Felis	43652.0	1	Felis catus	43652.0	1
scf7180000019164	1210790	0.3959	0	50.34	Eukaryota	69720.0	0	Chordata	69720.0	0	Carnivora	69720.0	0	Felidae	69720.0	0	Felis	27880.0	2	Felis catus	27880.0	2
scf7180000019433	276887	0.5504	0	46.3371	Eukaryota	18953.0	0	Chordata	18953.0	0	Carnivora	18953.0	0	Felidae	18953.0	0	Felis	17065.0	1	Felis catus	17065.0	1
scf7180000018573	1423404	0.4753	0	50.4864	Eukaryota	45220.0	0	Chordata	45220.0	0	Carnivora	45220.0	0	Felidae	45220.0	0	Felis	45220.0	0	Felis catus	45220.0	0
scf7180000024285	79142	0.6455	0	51.4293	Eukaryota	12387.0	0	Chordata	12387.0	0	Carnivora	12387.0	0	Felidae	9826.0	1	Acinonyx	3678.0	5	Acinonyx jubatus	3678.0	5
scf7180000017872	1407510	0.4212	0	54.2532	Eukaryota	53473.0	0	Chordata	53473.0	0	Carnivora	53473.0	0	Felidae	53473.0	0	Panthera	48150.0	1	Panthera pardus	48150.0	1
scf7180000022324	12245	0.5232	0	398.0572	no-hit	0.0	0	no-hit	0.0	0	no-hit	0.0	0	no-hit	0.0	0	no-hit	0.0	0	no-hit	0.0	0
scf7180000018210	15588	0.3489	0	23.5542	Eukaryota	9467.0	0	Chordata	9467.0	0	Carnivora	9467.0	0	Felidae	9467.0	0	Felis	8526.0	1	Felis catus	8526.0	1
scf7180000022575	30900	0.4861	0	1218.8436	Eukaryota	2323.0	0	Chordata	2323.0	0	Carnivora	1555.0	1	Felidae	1555.0	3	Felis	1555.0	3	Felis catus	1555.0	3
scf7180000019485	292906	0.3469	0	47.5051	Eukaryota	47505.0	0	Chordata	47505.0	0	Carnivora	47505.0	0	Felidae	47505.0	0	Felis	47505.0	0	Felis catus	47505.0	0
scf7180000023554	39140	0.5	0	5792.696	Eukaryota	17951.0	0	Chordata	17951.0	0	Carnivora	17951.0	0	Felidae	14462.0	1	Acinonyx	3554.0	5	Acinonyx jubatus	3554.0	5
scf7180000018885	492110	0.5405	0	50.3705	Eukaryota	34657.0	0	Chordata	34657.0	0	Perissodactyla	19872.0	2	Equidae	19872.0	3	Equus	19872.0	3	Equus caballus	19872.0	3
scf7180000020771	132424	0.4354	0	50.1297	Eukaryota	14827.0	1	Chordata	14827.0	1	Primates	7483.0	3	Hominidae	6229.0	5	Homo	6229.0	6	Homo sapiens	6229.0	6
scf7180000022270	10170	0.5218	0	266.966	no-hit	0.0	0	no-hit	0.0	0	no-hit	0.0	0	no-hit	0.0	0	no-hit	0.0	0	no-hit	0.0	0
scf7180000023662	100919	0.3953	0	373.5486	Eukaryota	46120.0	0	Chordata	46120.0	0	Carnivora	46120.0	0	Felidae	46120.0	0	Felis	46120.0	0	Felis catus	46120.0	0
scf7180000019364	453051	0.6465	0	50.4081	Eukaryota	42000.0	0	Chordata	42000.0	0	Carnivora	42000.0	0	Felidae	42000.0	0	Acinonyx	18144.0	3	Acinonyx jubatus	18144.0	3
scf7180000024281	219707	0.4979	0	27.012	Eukaryota	15780.0	0	Chordata	15780.0	0	Carnivora	15780.0	0	Felidae	13793.0	2	Felis	6500.0	4	Felis catus	6500.0	4
scf7180000019154	611139	0.4096	0	51.817	Eukaryota	73321.0	0	Chordata	73321.0	0	Carnivora	73321.0	0	Ursidae	41165.0	1	Ursus	34576.0	3	Ursus maritimus	20754.0	4
scf7180000024120	260260	0.4353	0	50.7818	Eukaryota	13469.0	0	Chordata	13469.0	0	Carnivora	13469.0	0	Felidae	13469.0	0	Felis	13469.0	0	Felis catus	13469.0	0
scf7180000019159	378972	0.4454	0	51.8176	Eukaryota	47875.0	0	Chordata	47875.0	0	Carnivora	47875.0	0	Felidae	33567.0	1	Lynx	19549.0	3	Lynx canadensis	19549.0	4
scf7180000023020	25749	0.4023	0	248.0259	Eukaryota	6555.0	0	Chordata	6555.0	0	Carnivora	6555.0	0	Felidae	6555.0	0	Felis	6555.0	0	Felis catus	6555.0	0
scf7180000018963	626132	0.4531	0	49.8325	Eukaryota	46129.0	0	Chordata	46129.0	0	Carnivora	46129.0	0	Felidae	46129.0	0	Felis	41558.0	1	Felis catus	41558.0	1
scf7180000017969	54737	0.3938	0	25.0698	Eukaryota	46385.0	0	Chordata	46385.0	0	Carnivora	46385.0	0	Felidae	46385.0	0	Panthera	23325.0	1	Panthera pardus	23325.0	1
scf7180000021274	59533	0.4119	0	26.3532	Eukaryota	42174.0	0	Chordata	42174.0	0	Carnivora	42174.0	0	Felidae	42174.0	0	Felis	38020.0	1	Felis catus	38020.0	1
scf7180000019600	140129	0.4394	0	48.5496	Eukaryota	51893.0	0	Chordata	51893.0	0	Carnivora	39947.0	2	Felidae	35677.0	3	Lynx	11972.0	6	Lynx canadensis	11972.0	7
scf7180000024280	329869	0.4667	0	52.2089	Eukaryota	51425.0	0	Chordata	51425.0	0	Carnivora	51425.0	0	Felidae	45838.0	1	Felis	20332.0	3	Felis catus	20332.0	3
scf7180000024112	1235015	0.3986	0	50.6317	Eukaryota	51788.0	0	Chordata	51788.0	0	Carnivora	51788.0	0	Felidae	51788.0	0	Felis	51788.0	0	Felis catus	51788.0	0
scf7180000022265	39823	0.3523	0	24.375	Eukaryota	9114.0	0	Chordata	9114.0	0	Carnivora	4580.0	2	Felidae	3630.0	3	Felis	3630.0	3	Felis catus	3630.0	3
scf7180000017794	795365	0.3863	0	50.9956	Eukaryota	45411.0	0	Chordata	45411.0	0	Carnivora	45411.0	0	Felidae	45411.0	0	Felis	45411.0	0	Felis catus	45411.0	0
scf7180000018802	333877	0.4997	0	50.0596	Eukaryota	26796.0	0	Chordata	26796.0	0	Carnivora	26796.0	0	Felidae	26796.0	0	Panthera	21440.0	1	unresolved	10720.0	2
scf7180000017886	1254791	0.4562	0	51.6605	Eukaryota	55850.0	0	Chordata	55850.0	0	Carnivora	55850.0	0	Herpestidae	29120.0	1	Suricata	29120.0	1	Suricata suricatta	29120.0	1
scf7180000018344	487342	0.3891	0	48.2723	Eukaryota	47376.0	0	Chordata	47376.0	0	Carnivora	47376.0	0	Felidae	47376.0	0	Felis	47376.0	0	Felis catus	47376.0	0
scf7180000018692	700308	0.3472	0	48.5183	Eukaryota	53611.0	0	Chordata	53611.0	0	Carnivora	53611.0	0	Mustelidae	11785.0	4	Canis	10614.0	7	Canis lupus	10614.0	7
scf7180000024144	55911	0.4663	0	39.6272	Eukaryota	18449.0	0	Chordata	18449.0	0	Carnivora	18449.0	0	Otariidae	6884.0	3	Suricata	4994.0	6	Suricata suricatta	4994.0	7
scf7180000023996	529448	0.469	0	53.0547	Eukaryota	22319.0	0	Chordata	22319.0	0	Carnivora	22319.0	0	Felidae	20141.0	1	Acinonyx	5736.0	5	Acinonyx jubatus	5736.0	6
scf7180000021784	18460	0.6178	0	33.6789	Eukaryota	2440.0	0	Chordata	2440.0	0	Carnivora	2440.0	0	Felidae	2186.0	1	Neofelis	977.0	3	Neofelis nebulosa	977.0	4
scf7180000021825	52242	0.4016	0	25.168	Eukaryota	45730.0	0	Chordata	45730.0	0	Carnivora	45730.0	0	Felidae	45730.0	0	Felis	45730.0	0	Felis catus	45730.0	0
scf7180000021474	55909	0.581	0	52.2516	Eukaryota	23352.0	0	Chordata	23352.0	0	Carnivora	23352.0	0	Felidae	18777.0	2	Panthera	9383.0	6	Panthera pardus	7045.0	7
scf7180000020200	197767	0.3958	0	24.5786	Eukaryota	17600.0	0	Chordata	17600.0	0	Carnivora	17600.0	0	Felidae	17600.0	0	Felis	14005.0	1	Felis catus	14005.0	1
scf7180000022015	33016	0.3887	0	27.8787	Eukaryota	45380.0	0	Chordata	45380.0	0	Carnivora	45380.0	0	Felidae	45380.0	0	Felis	45380.0	0	Felis catus	45380.0	0
scf7180000018515	1403116	0.5085	0	50.6747	Eukaryota	40508.0	0	Chordata	40508.0	0	Carnivora	25851.0	1	Felidae	22259.0	3	Felis	10865.0	8	Felis catus	10865.0	8
scf7180000019137	391147	0.344	0	48.3707	Eukaryota	33682.0	0	Chordata	33682.0	0	Carnivora	33682.0	0	Felidae	33682.0	0	Felis	30505.0	1	Felis catus	30505.0	1
scf7180000023427	39403	0.526	0	165.487	Eukaryota	3725.0	0	Chordata	3725.0	0	Carnivora	3725.0	0	Felidae	3481.0	1	Felis	2840.0	2	Felis catus	2840.0	2
scf7180000019834	142247	0.3917	0	46.0241	Eukaryota	21682.0	0	Chordata	21682.0	0	Carnivora	21682.0	0	Felidae	21682.0	0	Felis	21682.0	0	Felis catus	21682.0	0
scf7180000024007	557715	0.3908	0	50.5072	Eukaryota	75394.0	0	Chordata	75394.0	0	Carnivora	75394.0	0	Felidae	61472.0	2	Felis	30924.0	3	Felis catus	30924.0	3
scf7180000022391	12055	0.368	0	43.4737	Eukaryota	7999.0	0	Chordata	7999.0	0	Carnivora	7999.0	0	Felidae	7999.0	0	Felis	7999.0	0	Felis catus	7999.0	0
scf7180000020745	79030	0.3892	0	24.9345	Eukaryota	48198.0	0	Chordata	48198.0	0	Carnivora	48198.0	0	Felidae	48198.0	0	Felis	37434.0	2	Felis catus	37434.0	2
scf7180000020826	176839	0.5673	0	51.0385	Eukaryota	17871.0	0	Chordata	17871.0	0	Carnivora	17871.0	0	Felidae	17871.0	0	Felis	14310.0	1	Felis catus	14310.0	1
scf7180000024238	67024	0.4126	0	56.6067	Eukaryota	41018.0	0	Chordata	41018.0	0	Carnivora	41018.0	0	Felidae	41018.0	0	Felis	36896.0	1	Felis catus	36896.0	1
scf7180000021791	29816	0.3671	0	23.4291	Eukaryota	19202.0	0	Chordata	19202.0	0	Carnivora	19202.0	0	Felidae	19202.0	0	Felis	15334.0	1	Felis catus	15334.0	1
scf7180000022518	22075	0.3701	0	25.6298	Eukaryota	7845.0	0	Chordata	7845.0	0	Carnivora	6568.0	1	Felidae	6568.0	1	Felis	3949.0	5	Felis catus	3949.0	6
scf7180000019101	33691	0.4531	0	30.1337	Eukaryota	21039.0	0	Chordata	21039.0	0	Carnivora	21039.0	0	Felidae	21039.0	0	Felis	18935.0	1	Felis catus	18935.0	1
scf7180000020018	2363582	0.3874	100	51.705	Eukaryota	50290.0	0	Chordata	50290.0	0	Carnivora	50290.0	0	Felidae	50290.0	0	Panthera	50290.0	0	Panthera pardus	50290.0	0
scf7180000022192	35111	0.4881	0	2887.2817	Eukaryota	2234.0	0	Chordata	2234.0	0	Carnivora	1758.0	1	Felidae	1552.0	3	Felis	1552.0	3	Felis catus	1552.0	3
scf7180000018466	663100	0.3452	0	48.4307	Eukaryota	36082.0	0	Chordata	36082.0	0	Carnivora	36082.0	0	Felidae	36082.0	0	Felis	36082.0	0	Felis catus	36082.0	0
scf7180000018319	450535	0.4249	0	52.2431	Eukaryota	49948.0	0	Chordata	49948.0	0	Carnivora	49948.0	0	Felidae	49948.0	0	Felis	29319.0	3	Felis catus	29319.0	3
scf7180000022228	27991	0.3996	0	24.6383	Eukaryota	35714.0	0	Chordata	35714.0	0	Carnivora	35714.0	0	Felidae	35714.0	0	Felis	35714.0	0	Felis catus	35714.0	0
scf7180000022093	42711	0.406	0	2388.8541	no-hit	0.0	0	no-hit	0.0	0	no-hit	0.0	0	no-hit	0.0	0	no-hit	0.0	0	no-hit	0.0	0
scf7180000018167	72818	0.3785	0	50.8535	Eukaryota	45136.0	0	Chordata	45136.0	0	Carnivora	45136.0	0	Felidae	45136.0	0	Felis	40613.0	1	Felis catus	40613.0	1
scf7180000020874	97576	0.4291	0	336.3112	Eukaryota	2200.0	0	Chordata	2200.0	0	Carnivora	2200.0	0	Felidae	2200.0	0	Felis	1770.0	2	Felis catus	1770.0	2
scf7180000021998	52550	0.4131	0	23.5464	Eukaryota	4987.0	0	Chordata	4987.0	0	Carnivora	2085.0	2	Felidae	2085.0	2	Pan	1346.0	5	Pan troglodytes	1346.0	6
scf7180000018072	47608	0.4029	0	44.3263	Eukaryota	9939.0	0	Chordata	9939.0	0	Carnivora	9939.0	0	Felidae	9939.0	0	Felis	9166.0	1	Felis catus	9166.0	1
scf7180000018096	1122530	0.3535	0	48.5179	Eukaryota	44741.0	0	Chordata	44741.0	0	Carnivora	44741.0	0	Felidae	44741.0	0	Felis	40323.0	1	Felis catus	40323.0	1
scf7180000020740	61609	0.5722	0	44.4566	Eukaryota	9157.0	0	Chordata	9157.0	0	Carnivora	9157.0	0	Felidae	6315.0	1	Felis	6315.0	1	Felis catus	6315.0	1
scf7180000017548	1310174	0.4079	0	49.2888	Eukaryota	47667.0	0	Chordata	47667.0	0	Carnivora	47667.0	0	Felidae	47667.0	0	Felis	47667.0	0	Felis catus	47667.0	0
scf7180000021562	71003	0.4196	0	25.3796	Eukaryota	43947.0	0	Chordata	43947.0	0	Carnivora	43947.0	0	Felidae	43947.0	0	Felis	43947.0	0	Felis catus	43947.0	0
scf7180000021047	86841	0.3763	0	24.7794	Eukaryota	40777.0	0	Chordata	40777.0	0	Carnivora	40777.0	0	Felidae	40777.0	0	Felis	40777.0	0	Felis catus	40777.0	0
scf7180000024131	233156	0.382	0	25.533	Eukaryota	45979.0	0	Chordata	45979.0	0	Carnivora	45979.0	0	Felidae	45979.0	0	Felis	45979.0	0	Felis catus	45979.0	0
scf7180000017700	285853	0.3816	0	50.6327	Eukaryota	23158.0	0	Chordata	23158.0	0	Carnivora	23158.0	0	Felidae	23158.0	0	Felis	20825.0	1	Felis catus	20825.0	1
scf7180000019947	159300	0.6071	0	53.0247	Eukaryota	7722.0	0	Chordata	7722.0	0	Carnivora	7722.0	0	Felidae	6990.0	1	Acinonyx	5422.0	3	Acinonyx jubatus	5422.0	3
scf7180000019699	73894	0.3748	0	22.4809	Eukaryota	18618.0	0	Chordata	18618.0	0	Carnivora	18618.0	0	Felidae	18618.0	0	Felis	16562.0	1	Felis catus	16562.0	1
scf7180000022675	8861	0.6428	0	51.2395	no-hit	0.0	0	no-hit	0.0	0	no-hit	0.0	0	no-hit	0.0	0	no-hit	0.0	0	no-hit	0.0	0
scf7180000018862	2481386	0.526	0	51.8127	Eukaryota	48289.0	0	Chordata	48289.0	0	Carnivora	48289.0	0	Felidae	38261.0	2	Acinonyx	20309.0	3	Acinonyx jubatus	20309.0	3
scf7180000018921	394523	0.4086	0	50.7954	Eukaryota	47155.0	0	Chordata	47155.0	0	Carnivora	47155.0	0	Felidae	47155.0	0	Felis	47155.0	0	Felis catus	47155.0	0
scf7180000023774	3273761	0.3953	0	51.1254	Eukaryota	56959.0	1	Chordata	56959.0	1	Carnivora	39037.0	2	Felidae	39037.0	2	Panthera	27895.0	4	Panthera pardus	22316.0	5
scf7180000021723	45321	0.4106	0	26.1226	Eukaryota	45624.0	0	Chordata	45624.0	0	Carnivora	45624.0	0	Felidae	45624.0	0	Felis	45624.0	0	Felis catus	45624.0	0
scf7180000018608	678871	0.3747	0	52.9059	Eukaryota	45616.0	0	Chordata	45616.0	0	Carnivora	45616.0	0	Felidae	45616.0	0	Felis	45616.0	0	Felis catus	45616.0	0
scf7180000020269	114323	0.642	0	50.9649	Eukaryota	15040.0	0	Chordata	15040.0	0	Carnivora	15040.0	0	Felidae	15040.0	0	Felis	15040.0	0	Felis catus	15040.0	0
scf7180000021398	12014	0.3617	0	25.8745	Eukaryota	45984.0	0	Chordata	45984.0	0	Carnivora	45984.0	0	Felidae	45984.0	0	Felis	45984.0	0	Felis catus	45984.0	0
scf7180000022648	5563	0.3786	0	32.3664	Eukaryota	2034.0	0	Chordata	2034.0	0	Carnivora	2034.0	0	Felidae	2034.0	0	Felis	1219.0	3	Felis catus	1219.0	3
scf7180000022069	15561	0.6556	0	54.1246	Eukaryota	2616.0	0	Chordata	2616.0	0	Carnivora	2616.0	0	Felidae	2616.0	0	Felis	1553.0	1	Felis catus	1553.0	1
scf7180000020301	117915	0.4135	0	24.585	Eukaryota	19821.0	0	Chordata	19821.0	0	Primates	9978.0	2	Hominidae	9978.0	2	Pan	6024.0	3	Pan troglodytes	6024.0	3
scf7180000020573	113139	0.4681	0	50.6647	Eukaryota	17368.0	0	Chordata	17368.0	0	Carnivora	17368.0	0	Felidae	17368.0	0	Felis	13897.0	1	Felis catus	13897.0	1
scf7180000017769	3870749	0.3924	0	50.3558	Eukaryota	60085.0	0	Chordata	60085.0	0	Carnivora	54583.0	1	Felidae	26183.0	3	Canis	21919.0	5	Canis lupus	21919.0	6
scf7180000022598	15033	0.4019	0	23.9545	Eukaryota	14310.0	0	Chordata	14310.0	0	Carnivora	14310.0	0	Felidae	14310.0	0	Felis	12854.0	1	Felis catus	12854.0	1
scf7180000019264	315510	0.4264	0	53.0078	Eukaryota	31411.0	0	Chordata	31411.0	0	Carnivora	31411.0	0	Felidae	24590.0	2	Acinonyx	8818.0	6	Acinonyx jubatus	8818.0	6
scf7180000022258	25793	0.3517	0	22.4727	Eukaryota	37617.0	0	Chordata	37617.0	0	Carnivora	37617.0	0	Felidae	37617.0	0	Felis	33823.0	1	Felis catus	33823.0	1
scf7180000019319	31175	0.4293	0	140.5911	Eukaryota	5209.0	0	Chordata	5209.0	0	Carnivora	4285.0	1	Felidae	2893.0	2	Felis	2893.0	2	Felis catus	2893.0	2
scf7180000017849	1469037	0.4133	0	51.283	Eukaryota	49658.0	0	Chordata	49658.0	0	Carnivora	49658.0	0	Herpestidae	44847.0	1	Suricata	44847.0	1	Suricata suricatta	44847.0	1
scf7180000023735	218230	0.4668	0	53.0169	Eukaryota	36129.0	0	Chordata	36129.0	0	Carnivora	36129.0	0	Felidae	36129.0	0	Felis	36129.0	0	Felis catus	36129.0	0
scf7180000018953	142559	0.4006	0	49.4451	Eukaryota	45974.0	0	Chordata	45974.0	0	Carnivora	45974.0	0	Felidae	45974.0	0	Felis	45974.0	0	Felis catus	45974.0	0
scf7180000017492	3095458	0.3775	0	50.5366	Eukaryota	48005.0	0	Chordata	48005.0	0	Carnivora	48005.0	0	Felidae	48005.0	0	Felis	48005.0	0	Felis catus	48005.0	0
scf7180000020312	20416	0.4994	0	27.0276	Eukaryota	3286.0	0	Chordata	3286.0	0	Carnivora	3286.0	0	Felidae	3016.0	1	Felis	1647.0	5	Felis catus	1647.0	5
scf7180000020869	138850	0.3627	0	25.9725	Eukaryota	46186.0	0	Chordata	46186.0	0	Carnivora	46186.0	0	Felidae	46186.0	0	Felis	46186.0	0	Felis catus	46186.0	0
scf7180000024138	199102	0.4632	0	51.5133	Eukaryota	16290.0	0	Chordata	16290.0	0	Carnivora	16290.0	0	Felidae	14871.0	1	Panthera	7635.0	5	Panthera pardus	6240.0	6
scf7180000023923	854839	0.3406	0	48.0328	Eukaryota	46638.0	0	Chordata	46638.0	0	Carnivora	46638.0	0	Felidae	46638.0	0	Felis	46638.0	0	Felis catus	46638.0	0
scf7180000017998	924545	0.3512	0	48.0246	Eukaryota	45309.0	0	Chordata	45309.0	0	Carnivora	45309.0	0	Felidae	45309.0	0	Felis	45309.0	0	Felis catus	45309.0	0
scf7180000018702	695464	0.4823	0	51.102	Eukaryota	17646.0	0	Chordata	17646.0	0	Carnivora	17646.0	0	Felidae	17646.0	0	Felis	15882.0	1	Felis catus	15882.0	1
scf7180000018889	525983	0.3449	0	48.5393	Eukaryota	46309.0	0	Chordata	46309.0	0	Carnivora	46309.0	0	Felidae	46309.0	0	Felis	46309.0	0	Felis catus	46309.0	0
scf7180000024107	112472	0.4374	0	49.7615	Eukaryota	10225.0	0	Chordata	10225.0	0	Carnivora	10225.0	0	Felidae	10225.0	0	Felis	9198.0	1	Felis catus	9198.0	1
scf7180000019327	297545	0.5118	0	51.3236	Eukaryota	14230.0	0	Chordata	14230.0	0	Carnivora	14230.0	0	Felidae	14230.0	0	Felis	9090.0	2	Felis catus	9090.0	2
scf7180000018287	1852828	0.426	0	51.0482	Eukaryota	44631.0	0	Chordata	44631.0	0	Carnivora	44631.0	0	Felidae	44631.0	0	Felis	44631.0	0	Felis catus	44631.0	0
scf7180000020134	153314	0.4726	0	52.0108	Eukaryota	75080.0	0	Chordata	75080.0	0	Carnivora	75080.0	0	Canidae	35583.0	2	Canis	28512.0	5	Canis lupus	28512.0	5
scf7180000017923	55475	0.4327	0	56.8809	Eukaryota	14091.0	0	Chordata	14091.0	0	Carnivora	12700.0	1	Felidae	8358.0	3	Panthera	4173.0	6	Suricata suricatta	2908.0	7
scf7180000021769	15300	0.3793	0	24.3938	Eukaryota	3368.0	1	Chordata	3368.0	1	Primates	3368.0	1	Hominidae	3368.0	1	Homo	2989.0	2	Homo sapiens	2989.0	2
scf7180000022420	14341	0.6512	0	49.5305	Eukaryota	2593.0	0	Chordata	2593.0	0	Carnivora	2593.0	0	Felidae	2593.0	0	Felis	1820.0	1	Felis catus	1820.0	1
scf7180000022060	57123	0.5296	0	51.2884	Eukaryota	3762.0	0	Chordata	3762.0	0	Primates	1425.0	3	Hominidae	1425.0	3	Homo	1425.0	4	Homo sapiens	1425.0	4
scf7180000018355	16300	0.4025	0	22.2823	Eukaryota	6803.0	0	Chordata	6803.0	0	Carnivora	6803.0	0	Felidae	6803.0	0	Felis	6803.0	0	Felis catus	6803.0	0
scf7180000021377	39490	0.4758	0	46.6572	Eukaryota	11285.0	0	Chordata	11285.0	0	Carnivora	11285.0	0	Felidae	10112.0	1	Lynx	4524.0	3	Lynx canadensis	4524.0	3
scf7180000019612	273264	0.5134	0	51.1516	Eukaryota	20820.0	1	Chordata	20820.0	1	Artiodactyla	11312.0	4	Monodontidae	6792.0	5	Monodon	4529.0	7	Monodon monoceros	4529.0	7
scf7180000019992	190400	0.4187	0	25.4991	Eukaryota	24911.0	0	Chordata	24911.0	0	Carnivora	24911.0	0	Felidae	21695.0	1	Felis	19248.0	2	Felis catus	19248.0	2
scf7180000019328	469708	0.459	0	52.8095	Eukaryota	32989.0	0	Chordata	32989.0	0	Carnivora	32989.0	0	Felidae	32989.0	0	Felis	32989.0	0	Felis catus	32989.0	0
scf7180000019536	105553	0.3743	0	25.327	Eukaryota	23604.0	0	Chordata	23604.0	0	Carnivora	23604.0	0	Felidae	23604.0	0	Felis	18841.0	1	Felis catus	18841.0	1
scf7180000023285	76960	0.4175	0	74.656	Eukaryota	45507.0	0	Chordata	45507.0	0	Carnivora	45507.0	0	Felidae	45507.0	0	Felis	45507.0	0	Felis catus	45507.0	0
scf7180000017874	10624	0.4133	0	38.0424	Eukaryota	43349.0	0	Chordata	43349.0	0	Carnivora	43349.0	0	Felidae	43349.0	0	Felis	43349.0	0	Felis catus	43349.0	0
scf7180000022485	13754	0.5523	0	47.9105	Eukaryota	2501.0	0	Chordata	2501.0	0	Carnivora	2501.0	0	Felidae	2251.0	1	Felis	2251.0	1	Felis catus	2251.0	1
scf7180000021665	54152	0.4977	0	48.5538	Eukaryota	9176.0	0	Chordata	9176.0	0	Carnivora	9176.0	0	Felidae	8503.0	1	Felis	8503.0	1	Felis catus	8503.0	1
scf7180000020744	51009	0.4039	0	49.0176	Eukaryota	7570.0	0	Chordata	7570.0	0	Carnivora	7570.0	0	Felidae	7570.0	0	Felis	7570.0	0	Felis catus	7570.0	0
scf7180000018474	93663	0.3857	0	50.823	Eukaryota	36997.0	0	Chordata	36997.0	0	Carnivora	36997.0	0	Felidae	36997.0	0	Felis	33490.0	1	Felis catus	33490.0	1
scf7180000020700	109414	0.3866	0	49.3992	Eukaryota	46787.0	0	Chordata	46787.0	0	Carnivora	46787.0	0	Felidae	46787.0	0	Felis	42131.0	1	Felis catus	42131.0	1
scf7180000018187	1154125	0.416	0	50.8435	Eukaryota	46260.0	0	Chordata	46260.0	0	Carnivora	46260.0	0	Felidae	46260.0	0	Felis	46260.0	0	Felis catus	46260.0	0
scf7180000018949	497661	0.3477	0	47.982	Eukaryota	42332.0	0	Chordata	42332.0	0	Carnivora	42332.0	0	Felidae	42332.0	0	Felis	38106.0	1	Felis catus	38106.0	1
scf7180000023894	236171	0.3905	0	47.735	Eukaryota	46840.0	0	Chordata	46840.0	0	Carnivora	46840.0	0	Felidae	46840.0	0	Felis	46840.0	0	Felis catus	46840.0	0
scf7180000024132	212983	0.551	0	51.7339	Eukaryota	15408.0	0	Chordata	15408.0	0	Carnivora	15408.0	0	Felidae	15408.0	0	Felis	15408.0	0	Felis catus	15408.0	0
scf7180000018421	119964	0.3598	0	45.5274	Eukaryota	44567.0	0	Chordata	44567.0	0	Carnivora	44567.0	0	Felidae	44567.0	0	Felis	44567.0	0	Felis catus	44567.0	0
scf7180000021050	81294	0.5988	0	63.6721	Eukaryota	4894.0	0	Chordata	4894.0	0	Primates	3454.0	1	Hominidae	1824.0	3	Homo	1824.0	3	Homo sapiens	1824.0	3
scf7180000022667	9288	0.3925	0	23.7158	Eukaryota	4631.0	0	Chordata	4631.0	0	Carnivora	4631.0	0	Felidae	4631.0	0	Felis	4631.0	0	Felis catus	4631.0	0
scf7180000019004	361868	0.4662	0	52.7047	Eukaryota	28119.0	0	Chordata	28119.0	0	Carnivora	28119.0	0	Felidae	28119.0	0	Felis	25304.0	1	Felis catus	25304.0	1
scf7180000020898	62909	0.3762	0	23.1568	Eukaryota	32884.0	0	Chordata	32884.0	0	Carnivora	32884.0	0	Felidae	32884.0	0	Felis	32884.0	0	Felis catus	32884.0	0
scf7180000017980	1349300	0.4491	0	51.6342	Eukaryota	59277.0	0	Chordata	59277.0	0	Carnivora	59277.0	0	Felidae	30749.0	3	Canis	11604.0	7	Canis lupus	11604.0	7
scf7180000018006	1293091	0.3995	0	51.9601	Eukaryota	59841.0	0	Chordata	59841.0	0	Carnivora	59841.0	0	Felidae	59841.0	0	Felis	49054.0	1	Felis catus	49054.0	1
scf7180000017959	407856	0.454	0	51.3268	Eukaryota	46055.0	0	Chordata	46055.0	0	Carnivora	46055.0	0	Felidae	46055.0	0	Felis	41508.0	1	Felis catus	41508.0	1
scf7180000021856	30325	0.4649	0	160.7691	Eukaryota	2297.0	0	Chordata	2297.0	0	Carnivora	2297.0	0	Felidae	2297.0	0	Felis	1859.0	1	Felis catus	1859.0	1
scf7180000021741	9914	0.5231	0	35.7366	no-hit	0.0	0	no-hit	0.0	0	no-hit	0.0	0	no-hit	0.0	0	no-hit	0.0	0	no-hit	0.0	0
scf7180000019675	250484	0.4151	0	53.8511	Eukaryota	46406.0	0	Chordata	46406.0	0	Carnivora	46406.0	0	Felidae	46406.0	0	Felis	46406.0	0	Felis catus	46406.0	0
scf7180000021403	34142	0.4909	0	243.7313	Eukaryota	3282.0	0	Chordata	3282.0	0	Carnivora	2349.0	1	Felidae	1874.0	2	Homo	933.0	4	Homo sapiens	933.0	4
scf7180000018310	23436	0.4178	0	27.5789	Eukaryota	16023.0	0	Chordata	16023.0	0	Carnivora	16023.0	0	Felidae	16023.0	0	Felis	12816.0	1	Felis catus	12816.0	1
scf7180000024046	341923	0.5534	0	50.7954	Eukaryota	60072.0	0	Chordata	60072.0	0	Carnivora	60072.0	0	Felidae	60072.0	0	Lynx	30327.0	1	Lynx canadensis	30327.0	1
scf7180000018349	752942	0.3892	0	51.3846	Eukaryota	47081.0	0	Chordata	47081.0	0	Carnivora	47081.0	0	Felidae	47081.0	0	Felis	47081.0	0	Felis catus	47081.0	0
scf7180000019241	37976	0.3962	0	41.029	Eukaryota	18073.0	0	Chordata	18073.0	0	Carnivora	18073.0	0	Felidae	18073.0	0	Felis	18073.0	0	Felis catus	18073.0	0
scf7180000020253	143348	0.541	0	49.2127	Eukaryota	7649.0	1	Chordata	7649.0	1	Carnivora	5344.0	2	Felidae	5344.0	3	Felis	2698.0	4	Felis catus	2698.0	4
scf7180000018288	1090570	0.4159	0	57.0791	Eukaryota	118910.0	0	Chordata	118910.0	0	Carnivora	118910.0	0	Felidae	118910.0	0	Lynx	56593.0	3	Lynx canadensis	56593.0	3
scf7180000023094	12823	0.5113	0	351.6745	Eukaryota	21685.0	0	Chordata	21685.0	0	Carnivora	21685.0	0	Felidae	21685.0	0	Felis	19481.0	1	Felis catus	19481.0	1
scf7180000017814	1649496	0.3694	0	49.8573	Eukaryota	45320.0	0	Chordata	45320.0	0	Carnivora	45320.0	0	Felidae	45320.0	0	Felis	45320.0	0	Felis catus	45320.0	0
scf7180000021985	21944	0.3889	0	25.1287	Eukaryota	15910.0	0	Chordata	15910.0	0	Carnivora	15910.0	0	Felidae	15910.0	0	Felis	14288.0	1	Felis catus	14288.0	1
scf7180000018073	1805534	0.3942	0	51.0092	Eukaryota	30272.0	0	Chordata	30272.0	0	Carnivora	30272.0	0	Felidae	30272.0	0	Felis	30272.0	0	Felis catus	30272.0	0
scf7180000021837	43312	0.3626	0	23.6743	Eukaryota	34091.0	0	Chordata	34091.0	0	Carnivora	34091.0	0	Felidae	34091.0	0	Felis	34091.0	0	Felis catus	34091.0	0
scf7180000017856	2781099	0.383	0	49.8669	Eukaryota	52722.0	0	Chordata	52722.0	0	Carnivora	52722.0	0	Felidae	47407.0	1	Acinonyx	31548.0	3	Acinonyx jubatus	31548.0	3
scf7180000023837	1614864	0.531	0	50.1612	Eukaryota	28517.0	0	Chordata	28517.0	0	Carnivora	28517.0	0	Felidae	28517.0	0	Felis	25645.0	1	Felis catus	25645.0	1
scf7180000018219	961526	0.4443	0	52.0272	Eukaryota	32351.0	0	Chordata	32351.0	0	Carnivora	32351.0	0	Felidae	25964.0	2	Acinonyx	9794.0	5	Acinonyx jubatus	9794.0	5
scf7180000022897	69478	0.3553	0	504.86	Eukaryota	12692.0	0	Chordata	12692.0	0	Carnivora	12692.0	0	Felidae	12692.0	0	Felis	7650.0	1	Felis catus	7650.0	1
scf7180000022806	3868	0.3976	0	25.1144	Eukaryota	3863.0	0	Chordata	3863.0	0	Carnivora	3004.0	1	Felidae	3004.0	1	Felis	2627.0	2	Felis catus	2627.0	2
scf7180000018467	78606	0.3979	0	50.0955	Eukaryota	44942.0	0	Chordata	44942.0	0	Carnivora	44942.0	0	Felidae	44942.0	0	Felis	40513.0	1	Felis catus	40513.0	1
scf7180000024199	88021	0.4723	0	53.3173	Eukaryota	24424.0	0	Chordata	24424.0	0	Carnivora	24424.0	0	Felidae	24424.0	0	Felis	19116.0	1	Felis catus	19116.0	1
scf7180000021568	54263	0.4279	0	25.4713	Eukaryota	47410.0	0	Chordata	47410.0	0	Carnivora	42704.0	1	Felidae	32932.0	2	Lynx	14151.0	4	Lynx canadensis	14151.0	4
scf7180000022400	30108	0.5664	0	52.7333	Eukaryota	22273.0	0	Chordata	22273.0	0	Carnivora	22273.0	0	Felidae	14744.0	3	Lynx	5124.0	6	Lynx canadensis	5124.0	6
scf7180000020849	137618	0.3641	0	49.698	Eukaryota	45373.0	0	Chordata	45373.0	0	Carnivora	45373.0	0	Felidae	45373.0	0	Felis	45373.0	0	Felis catus	45373.0	0
scf7180000019179	183189	0.3723	100	25.0324	Eukaryota	46221.0	0	Chordata	46221.0	0	Carnivora	46221.0	0	Felidae	46221.0	0	Felis	46221.0	0	Felis catus	46221.0	0
scf7180000019110	514191	0.3714	0	50.6904	Eukaryota	47247.0	0	Chordata	47247.0	0	Carnivora	47247.0	0	Felidae	47247.0	0	Felis	42584.0	1	Felis catus	42584.0	1
scf7180000022807	3747	0.4406	0	24.7035	Eukaryota	15649.0	0	Chordata	15649.0	0	Carnivora	15649.0	0	Felidae	15649.0	0	Felis	15649.0	0	Felis catus	15649.0	0
scf7180000022307	13247	0.6469	0	54.9475	Eukaryota	2760.0	0	Chordata	2760.0	0	Artiodactyla	2492.0	1	Physeteridae	1683.0	2	Physeter	1683.0	3	Physeter catodon	1683.0	4
scf7180000023581	20997	0.4756	0	412.4777	no-hit	0.0	0	no-hit	0.0	0	no-hit	0.0	0	no-hit	0.0	0	no-hit	0.0	0	no-hit	0.0	0
scf7180000021477	53578	0.4139	0	25.3073	Eukaryota	10974.0	0	Chordata	10974.0	0	Artiodactyla	5591.0	2	Delphinidae	3553.0	5	Pseudorca	3553.0	5	Pseudorca crassidens	3553.0	5
scf7180000021086	61700	0.4148	0	25.3374	Eukaryota	9502.0	0	Chordata	9502.0	0	Artiodactyla	3639.0	3	Felidae	3539.0	4	Felis	2814.0	5	Felis catus	2814.0	5
scf7180000023284	48515	0.3897	0	146.2588	Eukaryota	14705.0	0	Chordata	14705.0	0	Carnivora	14705.0	0	Felidae	14705.0	0	Felis	11768.0	1	Felis catus	11768.0	1
scf7180000020026	189353	0.4336	0	50.0783	Eukaryota	30892.0	0	Chordata	30892.0	0	Primates	17243.0	2	Hominidae	10178.0	4	Homo	10178.0	5	Homo sapiens	10178.0	5
scf7180000022098	4483	0.5206	0	36.6581	no-hit	0.0	0	no-hit	0.0	0	no-hit	0.0	0	no-hit	0.0	0	no-hit	0.0	0	no-hit	0.0	0
scf7180000023849	323123	0.5371	0	52.2043	Eukaryota	21203.0	0	Chordata	21203.0	0	Carnivora	16329.0	1	Felidae	10591.0	4	Felis	6473.0	6	Panthera pardus	4118.0	7
scf7180000019837	339650	0.4595	0	25.7972	Eukaryota	32163.0	0	Chordata	32163.0	0	Carnivora	32163.0	0	Felidae	16777.0	3	Felis	11535.0	7	Felis catus	11535.0	7
scf7180000018345	551425	0.4885	0	49.0508	Eukaryota	37078.0	0	Chordata	37078.0	0	Carnivora	37078.0	0	Felidae	30666.0	1	Acinonyx	11541.0	4	Acinonyx jubatus	11541.0	4
scf7180000019194	4932	0.382	0	24.1124	Eukaryota	11802.0	0	Chordata	11802.0	0	Carnivora	11802.0	0	Felidae	11802.0	0	Felis	9441.0	1	Felis catus	9441.0	1
scf7180000017767	2319926	0.3728	0	50.1521	Eukaryota	56026.0	0	Chordata	56026.0	0	Carnivora	56026.0	0	Felidae	33619.0	3	Suricata	12355.0	7	Suricata suricatta	12355.0	8
scf7180000021832	41640	0.3619	0	24.827	Eukaryota	59677.0	0	Chordata	59677.0	0	Carnivora	59677.0	0	Felidae	43045.0	2	Felis	22023.0	4	Felis catus	22023.0	4
scf7180000018001	2528617	0.396	0	50.7416	Eukaryota	70978.0	0	Chordata	70978.0	0	Carnivora	70978.0	0	Felidae	44210.0	2	Felis	15124.0	5	Felis catus	15124.0	5
scf7180000024246	1036456	0.4824	0	51.0694	Eukaryota	46206.0	0	Chordata	46206.0	0	Carnivora	46206.0	0	Felidae	37568.0	1	Panthera	13737.0	5	Lynx canadensis	9702.0	6
scf7180000021266	77519	0.4048	0	24.584	Eukaryota	30002.0	0	Chordata	30002.0	0	Carnivora	30002.0	0	Canidae	30002.0	0	Canis	30002.0	0	Canis lupus	30002.0	0
scf7180000020533	180228	0.3993	0	51.2516	Eukaryota	15332.0	0	Chordata	15332.0	0	Apterygiformes	13651.0	1	Apterygidae	13651.0	1	Apteryx	13651.0	1	Apteryx mantelli	13651.0	1
scf7180000020109	30928	0.4109	0	286.5167	Eukaryota	8913.0	0	Chordata	8913.0	0	Carnivora	8913.0	0	Felidae	8913.0	0	Felis	7032.0	1	Felis catus	7032.0	1
scf7180000018655	7488	0.472	0	25.1199	Eukaryota	11120.0	0	Chordata	11120.0	0	Carnivora	11120.0	0	Felidae	11120.0	0	Felis	11120.0	0	Felis catus	11120.0	0
scf7180000020475	97613	0.5582	0	47.06	Eukaryota	27293.0	1	Chordata	27293.0	1	Primates	11659.0	3	Hominidae	11659.0	5	Homo	8881.0	7	Homo sapiens	8881.0	7
scf7180000020277	181373	0.4111	100	47.069	Eukaryota	26020.0	0	Chordata	26020.0	0	Carnivora	26020.0	0	Felidae	26020.0	0	Felis	23366.0	1	Felis catus	23366.0	1
scf7180000018211	1031184	0.4723	0	51.5961	Eukaryota	28690.0	0	Chordata	28690.0	0	Carnivora	28690.0	0	Felidae	28690.0	0	Felis	25794.0	1	Felis catus	25794.0	1
scf7180000022285	42274	0.3694	0	22.8359	Eukaryota	25083.0	0	Chordata	25083.0	0	Carnivora	25083.0	0	Felidae	25083.0	0	Felis	25083.0	0	Felis catus	25083.0	0
scf7180000019626	4125	0.3862	0	27.1797	Eukaryota	2096.0	1	Chordata	2096.0	1	Carnivora	1285.0	2	Felidae	1033.0	3	Felis	1033.0	4	Felis catus	1033.0	4
scf7180000017710	1676063	0.4476	0	50.5605	Eukaryota	80288.0	0	Chordata	80288.0	0	Carnivora	80288.0	0	Felidae	80288.0	0	Acinonyx	38087.0	2	Acinonyx jubatus	38087.0	2
scf7180000019349	298093	0.4915	0	50.9997	Eukaryota	18215.0	0	Chordata	18215.0	0	Carnivora	18215.0	0	Felidae	18215.0	0	Felis	12785.0	3	Felis catus	12785.0	3
scf7180000021577	26473	0.4315	0	187.4576	Eukaryota	2288.0	0	Chordata	2288.0	0	Carnivora	2288.0	0	Felidae	2288.0	0	Felis	1643.0	2	Felis catus	1643.0	2
scf7180000022785	8763	0.3822	0	22.0864	Eukaryota	15806.0	0	Chordata	15806.0	0	Carnivora	15806.0	0	Felidae	15806.0	0	Felis	14252.0	1	Felis catus	14252.0	1
scf7180000017446	4096778	0.3861	0	51.0061	Eukaryota	65915.0	0	Chordata	65915.0	0	Carnivora	65915.0	0	Felidae	65915.0	0	Panthera	29752.0	3	Panthera pardus	29752.0	3
scf7180000018936	13874	0.3685	0	24.8139	Eukaryota	11169.0	0	Chordata	11169.0	0	Carnivora	11169.0	0	Felidae	11169.0	0	Felis	9903.0	1	Felis catus	9903.0	1
scf7180000020907	76687	0.5755	0	50.3615	Eukaryota	13099.0	0	Chordata	13099.0	0	Carnivora	13099.0	0	Felidae	13099.0	0	Felis	11828.0	1	Felis catus	11828.0	1
scf7180000020995	77921	0.403	0	57.9111	Eukaryota	38828.0	0	Chordata	38828.0	0	Carnivora	38828.0	0	Felidae	38828.0	0	Felis	34979.0	1	Felis catus	34979.0	1
scf7180000020279	58503	0.4151	0	62.6432	Eukaryota	13551.0	0	Chordata	13551.0	0	Carnivora	13551.0	0	Felidae	13551.0	0	Felis	12226.0	1	Felis catus	12226.0	1
scf7180000020468	124034	0.5682	0	26.9698	Eukaryota	31286.0	0	Chordata	31286.0	0	Carnivora	31286.0	0	Felidae	18918.0	1	Felis	12676.0	2	Felis catus	12676.0	2
scf7180000017762	30631	0.3691	0	47.4253	Eukaryota	21703.0	0	Chordata	21703.0	0	Carnivora	21703.0	0	Felidae	21703.0	0	Felis	19555.0	1	Felis catus	19555.0	1
scf7180000021803	45458	0.4648	0	26.9613	Eukaryota	13748.0	0	Chordata	13748.0	0	Primates	10025.0	3	Hominidae	7149.0	4	Homo	7149.0	5	Homo sapiens	7149.0	5
scf7180000024171	93421	0.3836	0	51.1348	Eukaryota	10650.0	0	Chordata	10650.0	0	Carnivora	10650.0	0	Felidae	10650.0	0	Felis	4272.0	2	Felis catus	4272.0	2
scf7180000022655	17473	0.5146	0	28.2937	Eukaryota	17033.0	0	Chordata	17033.0	0	Carnivora	12400.0	3	Felidae	9099.0	5	Felis	2534.0	8	Felis catus	2534.0	8
scf7180000019985	155710	0.3687	0	48.5036	Eukaryota	44696.0	0	Chordata	44696.0	0	Carnivora	44696.0	0	Felidae	44696.0	0	Felis	44696.0	0	Felis catus	44696.0	0
scf7180000018432	181123	0.3823	0	49.5061	Eukaryota	29700.0	0	Chordata	29700.0	0	Carnivora	29700.0	0	Felidae	29700.0	0	Acinonyx	14820.0	2	Acinonyx jubatus	14820.0	2
scf7180000022225	255492	0.5611	0	52.0012	Eukaryota	20811.0	0	Chordata	20811.0	0	Carnivora	20811.0	0	Felidae	20811.0	0	Lynx	14378.0	1	Lynx canadensis	14378.0	1
scf7180000017585	1991287	0.4321	0	51.7769	Eukaryota	51902.0	0	Chordata	51902.0	0	Carnivora	51902.0	0	Felidae	26818.0	4	Panthera	10697.0	7	Lynx canadensis	5398.0	9
scf7180000018848	3083677	0.3593	0	48.9879	Eukaryota	47003.0	0	Chordata	47003.0	0	Carnivora	47003.0	0	Phocidae	18679.0	2	Zalophus	13978.0	4	Zalophus californianus	13978.0	4
scf7180000018732	677648	0.4369	0	51.3009	Eukaryota	22977.0	0	Chordata	22977.0	0	Carnivora	22977.0	0	Felidae	22977.0	0	Felis	22977.0	0	Felis catus	22977.0	0
scf7180000020128	89581	0.4285	0	48.9449	Eukaryota	13632.0	0	Chordata	13632.0	0	Carnivora	13632.0	0	Felidae	13632.0	0	Felis	10934.0	1	Felis catus	10934.0	1
scf7180000017745	2106719	0.4187	0	51.3462	Eukaryota	46622.0	0	Chordata	46622.0	0	Carnivora	46622.0	0	Felidae	46622.0	0	Felis	46622.0	0	Felis catus	46622.0	0
scf7180000019687	238985	0.3737	0	25.4348	Eukaryota	51541.0	0	Chordata	51541.0	0	Carnivora	51541.0	0	Felidae	26881.0	4	Panthera	10849.0	8	Panthera pardus	5432.0	9
scf7180000024257	3204198	0.4122	0	52.5559	Eukaryota	44703.0	0	Chordata	44703.0	0	Carnivora	44703.0	0	Felidae	44703.0	0	Felis	35721.0	2	Felis catus	35721.0	2
scf7180000019530	374484	0.3751	0	50.5864	Eukaryota	46379.0	0	Chordata	46379.0	0	Carnivora	46379.0	0	Felidae	46379.0	0	Felis	46379.0	0	Felis catus	46379.0	0
scf7180000020793	119361	0.3798	0	27.979	Eukaryota	22970.0	0	Chordata	22970.0	0	Carnivora	22970.0	0	Felidae	22970.0	0	Felis	16095.0	1	Felis catus	16095.0	1
scf7180000018408	14525	0.4927	0	39.9403	Eukaryota	13957.0	0	Chordata	13957.0	0	Carnivora	13957.0	0	Felidae	13957.0	0	Felis	9856.0	1	Felis catus	9856.0	1
scf7180000021584	39995	0.4487	0	47.2964	Eukaryota	39220.0	0	Chordata	39220.0	0	Carnivora	39220.0	0	Felidae	30444.0	1	Panthera	12827.0	4	Suricata suricatta	8776.0	5
scf7180000022251	10392	0.3685	0	23.054	Eukaryota	2428.0	0	Chordata	2428.0	0	Carnivora	2428.0	0	Felidae	2163.0	1	Felis	1935.0	2	Felis catus	1935.0	2
scf7180000020927	95757	0.3927	0	49.2684	Eukaryota	7044.0	0	Chordata	7044.0	0	Carnivora	4673.0	1	Felidae	4673.0	1	Felis	4673.0	1	Felis catus	4673.0	1
scf7180000020631	124985	0.4662	0	53.6985	Eukaryota	17796.0	0	Chordata	17796.0	0	Carnivora	10639.0	2	Felidae	7161.0	4	Equus	5393.0	7	Equus caballus	5393.0	7
scf7180000019826	275249	0.3867	0	52.6162	Eukaryota	48521.0	0	Chordata	48521.0	0	Carnivora	48521.0	0	Felidae	48521.0	0	Panthera	22834.0	2	Lynx canadensis	22420.0	3
scf7180000021457	46423	0.3792	0	25.6331	Eukaryota	29462.0	0	Chordata	29462.0	0	Carnivora	29462.0	0	Felidae	29462.0	0	Felis	26453.0	1	Felis catus	26453.0	1
scf7180000020259	120408	0.3946	0	49.9761	Eukaryota	6794.0	0	Chordata	6794.0	0	Primates	3349.0	2	Hominidae	3349.0	3	Homo	3349.0	3	Homo sapiens	3349.0	3
scf7180000018085	1257586	0.424	0	51.7992	Eukaryota	44063.0	0	Chordata	44063.0	0	Carnivora	35436.0	1	Felidae	31007.0	3	Acinonyx	16792.0	4	Acinonyx jubatus	16792.0	4
scf7180000020543	77622	0.4254	0	44.6453	Eukaryota	13852.0	0	Chordata	13852.0	0	Carnivora	13852.0	0	Felidae	13852.0	0	Leopardus	5476.0	5	Felis catus	1533.0	9
scf7180000020531	107026	0.4165	0	25.4606	Eukaryota	9566.0	0	Chordata	9566.0	0	Carnivora	7988.0	1	Felidae	7988.0	1	Felis	7988.0	1	Felis catus	7988.0	1
scf7180000019044	890077	0.4893	0	49.4462	Eukaryota	32630.0	0	Chordata	32630.0	0	Artiodactyla	25294.0	2	Delphinidae	19314.0	3	Lagenorhynchus	6574.0	6	Lagenorhynchus obliquidens	6574.0	6
scf7180000023781	2235489	0.3999	0	51.5537	Eukaryota	52240.0	0	Chordata	52240.0	0	Carnivora	52240.0	0	Felidae	29640.0	3	Felis	18430.0	5	Felis catus	18430.0	5
scf7180000023994	642721	0.3542	0	49.4449	Eukaryota	22196.0	0	Chordata	22196.0	0	Carnivora	22196.0	0	Herpestidae	13620.0	1	Suricata	13620.0	2	Suricata suricatta	13620.0	2
scf7180000022579	17324	0.5249	0	49.6452	Eukaryota	2180.0	0	Chordata	2180.0	0	Carnivora	2180.0	0	Felidae	1954.0	1	Felis	1954.0	1	Felis catus	1954.0	1
scf7180000017990	1208474	0.4573	0	47.5951	Eukaryota	36236.0	0	Chordata	36236.0	0	Carnivora	36236.0	0	Felidae	28774.0	1	Acinonyx	7750.0	4	Acinonyx jubatus	7750.0	5
scf7180000019671	242963	0.5235	0	51.3747	Eukaryota	17074.0	0	Chordata	17074.0	0	Carnivora	17074.0	0	Felidae	10298.0	1	Suricata	6776.0	2	Suricata suricatta	6776.0	2
scf7180000020372	977988	0.368	0	49.9982	Eukaryota	47438.0	0	Chordata	47438.0	0	Carnivora	47438.0	0	Felidae	47438.0	0	Felis	47438.0	0	Felis catus	47438.0	0
scf7180000022068	10385	0.5198	0	148.2838	no-hit	0.0	0	no-hit	0.0	0	no-hit	0.0	0	no-hit	0.0	0	no-hit	0.0	0	no-hit	0.0	0
scf7180000020386	18785	0.4259	0	422.4251	Eukaryota	197378.0	0	Chordata	197378.0	0	Carnivora	197378.0	0	Hyaenidae	197378.0	0	Proteles	121338.0	1	Proteles cristata	121338.0	1
scf7180000021958	21920	0.4296	0	26.6522	Eukaryota	41683.0	0	Chordata	41683.0	0	Carnivora	41683.0	0	Felidae	41683.0	0	Felis	41683.0	0	Felis catus	41683.0	0
scf7180000018512	953672	0.4515	0	53.0123	Eukaryota	41450.0	0	Chordata	41450.0	0	Carnivora	41450.0	0	Felidae	41450.0	0	Felis	37331.0	1	Felis catus	37331.0	1
scf7180000020291	122846	0.4471	0	25.6561	Eukaryota	37065.0	0	Chordata	37065.0	0	Carnivora	37065.0	0	Ursidae	18525.0	3	Ursus	9675.0	4	Ursus arctos	9675.0	4
scf7180000018476	29584	0.382	0	61.4811	Eukaryota	13647.0	0	Chordata	13647.0	0	Carnivora	13647.0	0	Felidae	10904.0	2	Panthera	6753.0	4	Panthera pardus	4085.0	5
scf7180000022637	15234	0.3736	0	26.1323	Eukaryota	5710.0	0	Chordata	5710.0	0	Primates	4134.0	2	Hominidae	4134.0	2	Homo	3759.0	3	Homo sapiens	3759.0	3
scf7180000020072	33283	0.4596	0	247.3745	Eukaryota	23845.0	0	Chordata	23845.0	0	Carnivora	23845.0	0	Felidae	23845.0	0	Felis	21442.0	1	Felis catus	21442.0	1
scf7180000021920	5669	0.5209	0	84.9148	no-hit	0.0	0	no-hit	0.0	0	no-hit	0.0	0	no-hit	0.0	0	no-hit	0.0	0	no-hit	0.0	0
scf7180000023909	639121	0.3754	0	49.0217	Eukaryota	46498.0	0	Chordata	46498.0	0	Carnivora	46498.0	0	Felidae	46498.0	0	Felis	46498.0	0	Felis catus	46498.0	0
scf7180000021509	54580	0.4529	0	25.9174	Eukaryota	8229.0	0	Chordata	8229.0	0	Carnivora	8229.0	0	Felidae	8229.0	0	Felis	6608.0	1	Felis catus	6608.0	1
scf7180000018045	1039060	0.3954	0	50.6737	Eukaryota	46530.0	0	Chordata	46530.0	0	Carnivora	46530.0	0	Felidae	46530.0	0	Felis	41340.0	1	Felis catus	41340.0	1
scf7180000021595	35016	0.4826	0	49.0845	Eukaryota	3903.0	1	Chordata	3903.0	1	Carnivora	1563.0	3	Felidae	1563.0	4	undef	1473.0	8	eukaryotic synthetic construct	1473.0	8
scf7180000020013	190116	0.4184	0	50.3434	Eukaryota	6769.0	0	Chordata	6769.0	0	Primates	3203.0	3	Hominidae	3203.0	3	Homo	2510.0	4	Homo sapiens	2510.0	4
scf7180000020582	60308	0.5106	0	48.2658	Eukaryota	4061.0	0	Chordata	4061.0	0	Carnivora	4061.0	0	Felidae	3700.0	1	Felis	2151.0	3	Felis catus	2151.0	3
scf7180000023526	17498	0.4628	0	239.7461	no-hit	0.0	0	no-hit	0.0	0	no-hit	0.0	0	no-hit	0.0	0	no-hit	0.0	0	no-hit	0.0	0
scf7180000017509	204610	0.3852	0	50.2736	Eukaryota	45081.0	0	Chordata	45081.0	0	Carnivora	45081.0	0	Felidae	45081.0	0	Felis	45081.0	0	Felis catus	45081.0	0
scf7180000018252	26356	0.3592	0	31.3456	Eukaryota	19338.0	0	Chordata	19338.0	0	Carnivora	19338.0	0	Felidae	19338.0	0	Felis	17328.0	1	Felis catus	17328.0	1
scf7180000021035	41462	0.5335	0	134.6186	Eukaryota	19785.0	0	Chordata	19785.0	0	Carnivora	19785.0	0	Felidae	19785.0	0	Felis	19785.0	0	Felis catus	19785.0	0
scf7180000019094	407503	0.4066	0	50.0663	Eukaryota	29604.0	0	Chordata	29604.0	0	Carnivora	29604.0	0	Felidae	29604.0	0	Felis	26543.0	1	Felis catus	26543.0	1
scf7180000022440	11190	0.4371	0	21.5205	Eukaryota	3392.0	0	Chordata	3392.0	0	Carnivora	2153.0	2	Felidae	1894.0	3	Felis	831.0	5	Felis catus	831.0	5
scf7180000018360	834847	0.4674	0	51.406	Eukaryota	53730.0	0	Chordata	53730.0	0	Carnivora	53730.0	0	Felidae	48398.0	1	Acinonyx	26870.0	2	Acinonyx jubatus	26870.0	2
scf7180000022123	36503	0.4245	100	27.1443	Eukaryota	11769.0	0	Chordata	11769.0	0	Carnivora	11769.0	0	Felidae	11769.0	0	Felis	9424.0	1	Felis catus	9424.0	1
scf7180000021124	57110	0.3889	0	26.4204	Eukaryota	17150.0	0	Chordata	17150.0	0	Carnivora	17150.0	0	Felidae	17150.0	0	Felis	15438.0	1	Felis catus	15438.0	1
scf7180000018568	706542	0.4486	0	53.0472	Eukaryota	43951.0	0	Chordata	43951.0	0	Carnivora	35801.0	1	Felidae	27798.0	2	Panthera	8846.0	5	Panthera pardus	8846.0	5
scf7180000019888	529518	0.6161	0	51.0019	Eukaryota	22699.0	0	Chordata	22699.0	0	Carnivora	22699.0	0	Felidae	17690.0	1	Felis	6319.0	4	Felis catus	6319.0	4
scf7180000021138	53045	0.473	0	47.5701	Eukaryota	5686.0	0	Chordata	5686.0	0	Carnivora	5686.0	0	Felidae	5686.0	0	Felis	5686.0	0	Felis catus	5686.0	0
scf7180000022557	18123	0.3549	0	70.3174	Eukaryota	2559.0	0	Chordata	2559.0	0	Carnivora	2154.0	1	Felidae	1906.0	2	Felis	1678.0	3	Felis catus	1678.0	3
scf7180000017835	979283	0.3493	0	48.736	Eukaryota	47732.0	0	Chordata	47732.0	0	Carnivora	47732.0	0	Felidae	47732.0	0	Felis	47732.0	0	Felis catus	47732.0	0
scf7180000021902	28111	0.3583	0	25.0614	Eukaryota	14206.0	0	Chordata	14206.0	0	Carnivora	14206.0	0	Phocidae	4365.0	4	Neomonachus	2906.0	7	Neomonachus schauinslandi	2906.0	7
scf7180000020872	62000	0.3775	0	25.5341	Eukaryota	43111.0	0	Chordata	43111.0	0	Carnivora	43111.0	0	Felidae	43111.0	0	Felis	43111.0	0	Felis catus	43111.0	0
scf7180000020353	107589	0.5598	0	49.133	Eukaryota	14369.0	0	Chordata	14369.0	0	Carnivora	7212.0	1	Felidae	7212.0	1	Eptesicus	5764.0	5	Eptesicus fuscus	5764.0	5
scf7180000023280	45746	0.5195	0	219.5614	Eukaryota	4591.0	0	Chordata	4591.0	0	Carnivora	4591.0	0	Felidae	4591.0	0	Felis	4319.0	1	Felis catus	4319.0	1
scf7180000022280	23952	0.3701	0	50.5493	Eukaryota	6362.0	0	Chordata	6362.0	0	Primates	2784.0	2	Hominidae	2784.0	3	Homo	2784.0	4	Homo sapiens	2784.0	4
scf7180000017819	1482206	0.4405	0	52.7437	Eukaryota	46764.0	0	Chordata	46764.0	0	Carnivora	46764.0	0	Felidae	46764.0	0	Felis	32823.0	1	Felis catus	32823.0	1
scf7180000021742	29878	0.3858	0	23.7656	Eukaryota	34652.0	0	Chordata	34652.0	0	Carnivora	34652.0	0	Felidae	34652.0	0	Felis	34652.0	0	Felis catus	34652.0	0
scf7180000018991	1080828	0.4362	0	52.3652	Eukaryota	47159.0	0	Chordata	47159.0	0	Carnivora	47159.0	0	Felidae	47159.0	0	Felis	47159.0	0	Felis catus	47159.0	0
scf7180000020848	71365	0.4048	0	51.1866	Eukaryota	23203.0	0	Chordata	23203.0	0	Perissodactyla	13039.0	1	Equidae	13039.0	1	Equus	13039.0	4	Equus przewalskii	8652.0	6
scf7180000017497	3865597	0.3561	0	49.6901	Eukaryota	47038.0	0	Chordata	47038.0	0	Carnivora	47038.0	0	Felidae	47038.0	0	Felis	47038.0	0	Felis catus	47038.0	0
scf7180000020585	154909	0.4958	0	26.8764	Eukaryota	35893.0	0	Chordata	35893.0	0	Carnivora	35893.0	0	Felidae	35893.0	0	Felis	35893.0	0	Felis catus	35893.0	0
scf7180000017961	271390	0.3681	0	48.8114	Eukaryota	45928.0	0	Chordata	45928.0	0	Carnivora	45928.0	0	Felidae	45928.0	0	Felis	45928.0	0	Felis catus	45928.0	0
scf7180000019930	185701	0.4002	0	25.8665	Eukaryota	45654.0	0	Chordata	45654.0	0	Carnivora	45654.0	0	Felidae	45654.0	0	Felis	41146.0	1	Felis catus	41146.0	1
scf7180000023908	177707	0.3545	0	49.1911	Eukaryota	47470.0	0	Chordata	47470.0	0	Carnivora	47470.0	0	Felidae	47470.0	0	Felis	47470.0	0	Felis catus	47470.0	0
scf7180000017985	1255180	0.4438	0	51.6684	Eukaryota	45895.0	0	Chordata	45895.0	0	Carnivora	45895.0	0	Felidae	40428.0	1	Felis	40428.0	1	Felis catus	40428.0	1
scf7180000019263	21207	0.4382	0	33.3311	Eukaryota	23284.0	0	Chordata	23284.0	0	Carnivora	23284.0	0	Felidae	23284.0	0	Felis	23284.0	0	Felis catus	23284.0	0
scf7180000023601	39997	0.4316	0	444.5569	no-hit	0.0	0	no-hit	0.0	0	no-hit	0.0	0	no-hit	0.0	0	no-hit	0.0	0	no-hit	0.0	0
scf7180000023865	1023733	0.3827	0	50.5321	Eukaryota	47058.0	0	Chordata	47058.0	0	Carnivora	47058.0	0	Felidae	47058.0	0	Felis	47058.0	0	Felis catus	47058.0	0
scf7180000020619	29119	0.3929	0	50.2023	Eukaryota	7881.0	0	Chordata	7881.0	0	Carnivora	7881.0	0	Felidae	7881.0	0	Felis	7105.0	1	Felis catus	7105.0	1
scf7180000022336	22125	0.4367	0	26.5507	Eukaryota	23099.0	0	Chordata	23099.0	0	Carnivora	23099.0	0	Canidae	8554.0	3	Lynx	7614.0	5	Lynx canadensis	7614.0	5
scf7180000021224	13294	0.4047	0	20.0694	Eukaryota	21292.0	0	Chordata	21292.0	0	Carnivora	21292.0	0	Felidae	21292.0	0	Felis	21292.0	0	Felis catus	21292.0	0
scf7180000019416	275403	0.5047	0	49.5011	Eukaryota	48123.0	0	Chordata	48123.0	0	Carnivora	48123.0	0	Felidae	48123.0	0	Panthera	32886.0	2	Panthera pardus	32886.0	2
scf7180000023136	28527	0.3903	0	401.5203	Eukaryota	6229.0	0	Chordata	6229.0	0	Carnivora	6229.0	0	Felidae	6229.0	0	Felis	6229.0	0	Felis catus	6229.0	0
scf7180000020424	111020	0.4145	0	47.259	Eukaryota	45998.0	0	Chordata	45998.0	0	Carnivora	45998.0	0	Felidae	45998.0	0	Felis	45998.0	0	Felis catus	45998.0	0
scf7180000020278	653795	0.3967	0	50.542	Eukaryota	33063.0	0	Chordata	33063.0	0	Carnivora	33063.0	0	Felidae	33063.0	0	Felis	33063.0	0	Felis catus	33063.0	0
scf7180000021638	34551	0.5671	0	50.5868	Eukaryota	2998.0	0	Chordata	2998.0	0	Carnivora	2685.0	1	Canidae	1776.0	3	Canis	1480.0	4	Canis lupus	1480.0	5
scf7180000020896	157402	0.4694	0	47.6725	Eukaryota	22275.0	0	Chordata	22275.0	0	Carnivora	22275.0	0	Felidae	22275.0	0	Felis	20060.0	1	Felis catus	20060.0	1
scf7180000019115	483306	0.3437	0	47.4589	Eukaryota	45962.0	0	Chordata	45962.0	0	Carnivora	45962.0	0	Felidae	45962.0	0	Felis	45962.0	0	Felis catus	45962.0	0
scf7180000022382	14817	0.4821	0	24.3956	Eukaryota	7061.0	0	Chordata	7061.0	0	Primates	3604.0	2	Hominidae	3604.0	4	Homo	1808.0	5	Homo sapiens	1808.0	5
scf7180000019728	232415	0.3879	0	24.6502	Eukaryota	16587.0	0	Chordata	16587.0	0	Carnivora	16587.0	0	Felidae	14490.0	1	Felis	10253.0	3	Felis catus	10253.0	3
scf7180000022288	18090	0.4397	0	27.0345	Eukaryota	3873.0	0	Chordata	3873.0	0	Carnivora	2400.0	1	Canidae	1956.0	2	Homo	1473.0	3	Homo sapiens	1473.0	3
scf7180000023824	1802253	0.3934	0	50.8121	Eukaryota	47110.0	0	Chordata	47110.0	0	Carnivora	47110.0	0	Felidae	47110.0	0	Felis	47110.0	0	Felis catus	47110.0	0
scf7180000019769	187023	0.4245	0	52.2228	Eukaryota	53627.0	0	Chordata	53627.0	0	Carnivora	53627.0	0	Felidae	43257.0	2	Lynx	16284.0	5	Lynx canadensis	16284.0	5
scf7180000021887	33546	0.5129	0	50.1472	Eukaryota	4888.0	0	Chordata	4888.0	0	Carnivora	4888.0	0	Felidae	4553.0	1	Panthera	1411.0	5	Lynx canadensis	998.0	6
scf7180000017863	30223	0.3819	0	50.3789	Eukaryota	8244.0	0	Chordata	8244.0	0	Carnivora	8244.0	0	Felidae	8244.0	0	Panthera	7422.0	1	Panthera pardus	6576.0	2
scf7180000017431	2964028	0.3804	0	52.1472	Eukaryota	62015.0	0	Chordata	62015.0	0	Carnivora	62015.0	0	Ursidae	23487.0	3	Ursus	23487.0	4	Ursus arctos	17756.0	5
scf7180000024261	347269	0.3864	100	48.2303	Eukaryota	45463.0	0	Chordata	45463.0	0	Carnivora	45463.0	0	Felidae	45463.0	0	Felis	45463.0	0	Felis catus	45463.0	0
scf7180000018759	28065	0.409	0	40.7557	Eukaryota	46233.0	0	Chordata	46233.0	0	Carnivora	46233.0	0	Felidae	46233.0	0	Felis	46233.0	0	Felis catus	46233.0	0
scf7180000020915	79657	0.3768	0	25.9904	Eukaryota	47232.0	0	Chordata	47232.0	0	Carnivora	47232.0	0	Felidae	47232.0	0	Felis	47232.0	0	Felis catus	47232.0	0
scf7180000018117	207292	0.3637	0	47.8895	Eukaryota	44285.0	0	Chordata	44285.0	0	Carnivora	44285.0	0	Felidae	44285.0	0	Felis	44285.0	0	Felis catus	44285.0	0
scf7180000024047	395093	0.5269	0	52.3327	Eukaryota	33918.0	0	Chordata	33918.0	0	Carnivora	33918.0	0	Felidae	33918.0	0	Felis	33918.0	0	Felis catus	33918.0	0
scf7180000021600	33952	0.3652	0	23.5929	Eukaryota	40938.0	0	Chordata	40938.0	0	Carnivora	40938.0	0	Felidae	40938.0	0	Felis	40938.0	0	Felis catus	40938.0	0
scf7180000020491	99872	0.6472	0	51.5578	Eukaryota	94201.0	0	Chordata	94201.0	0	Carnivora	60187.0	3	Felidae	33079.0	4	Canis	20048.0	7	Canis lupus	20048.0	7
scf7180000020339	113550	0.398	0	51.2562	Eukaryota	42538.0	0	Chordata	42538.0	0	Carnivora	42538.0	0	Felidae	42538.0	0	Felis	42538.0	0	Felis catus	42538.0	0
scf7180000018069	252601	0.4011	0	49.801	Eukaryota	46852.0	0	Chordata	46852.0	0	Carnivora	46852.0	0	Felidae	46852.0	0	Felis	46852.0	0	Felis catus	46852.0	0
scf7180000023802	2799608	0.4073	0	51.1958	Eukaryota	51291.0	0	Chordata	51291.0	0	Carnivora	51291.0	0	Felidae	39951.0	1	Felis	28477.0	2	Felis catus	28477.0	2
scf7180000018704	698215	0.4031	0	51.7751	Eukaryota	48554.0	0	Chordata	48554.0	0	Carnivora	48554.0	0	Felidae	48554.0	0	Panthera	38892.0	1	Panthera pardus	34027.0	2
scf7180000023757	4322580	0.362	0	49.3905	Eukaryota	46966.0	0	Chordata	46966.0	0	Carnivora	46966.0	0	Felidae	46966.0	0	Felis	32617.0	1	Felis catus	32617.0	1
scf7180000021534	39123	0.4147	0	24.4726	Eukaryota	30312.0	0	Chordata	30312.0	0	Carnivora	30312.0	0	Felidae	30312.0	0	Felis	27215.0	1	Felis catus	27215.0	1
scf7180000020586	25655	0.4606	0	1399.5096	Eukaryota	22916.0	0	Chordata	22916.0	0	Carnivora	22916.0	0	Felidae	22916.0	0	Felis	22916.0	0	Felis catus	22916.0	0
scf7180000022921	31195	0.5779	0	239.4483	Eukaryota	3645.0	0	Chordata	3645.0	0	Carnivora	3645.0	0	Felidae	2427.0	1	Felis	1861.0	2	Felis catus	1861.0	2
scf7180000020670	78298	0.5704	0	45.6633	Eukaryota	18074.0	0	Chordata	18074.0	0	Carnivora	18074.0	0	Felidae	14246.0	1	Panthera	10718.0	2	Panthera pardus	10718.0	2
scf7180000020309	124210	0.3871	0	46.4199	Eukaryota	27959.0	0	Chordata	27959.0	0	Carnivora	27959.0	0	Felidae	27959.0	0	Panthera	11270.0	2	Panthera pardus	8466.0	3
scf7180000020406	111484	0.393	0	25.4204	Eukaryota	80275.0	0	Chordata	80275.0	0	Carnivora	80275.0	0	Felidae	80275.0	0	Lynx	40050.0	2	Lynx canadensis	40050.0	2
scf7180000018436	92461	0.4016	0	50.8948	Eukaryota	33819.0	0	Chordata	33819.0	0	Carnivora	33819.0	0	Felidae	33819.0	0	Felis	30465.0	1	Felis catus	30465.0	1
scf7180000023106	15170	0.5013	0	259.766	Eukaryota	5984.0	0	Chordata	5984.0	0	Carnivora	5984.0	0	Phocidae	2440.0	2	Leptonychotes	1830.0	4	Leptonychotes weddellii	1830.0	4
scf7180000018037	1849665	0.3988	0	51.2777	Eukaryota	48611.0	0	Chordata	48611.0	0	Carnivora	48611.0	0	Felidae	48611.0	0	Felis	29041.0	2	Felis catus	29041.0	2
scf7180000021879	44024	0.3562	0	24.7587	Eukaryota	26412.0	0	Chordata	26412.0	0	Carnivora	26412.0	0	Felidae	26412.0	0	Felis	23758.0	1	Felis catus	23758.0	1
scf7180000022322	14545	0.3704	0	26.8512	Eukaryota	22042.0	0	Chordata	22042.0	0	Carnivora	22042.0	0	Felidae	22042.0	0	Felis	19814.0	1	Felis catus	19814.0	1
scf7180000019053	824068	0.5054	0	52.4233	Eukaryota	33658.0	0	Chordata	33658.0	0	Carnivora	33658.0	0	Felidae	21240.0	1	Canis	12418.0	4	Canis lupus	12418.0	4
scf7180000020708	85345	0.4357	0	25.2978	Eukaryota	44674.0	0	Chordata	44674.0	0	Carnivora	44674.0	0	Felidae	44674.0	0	Felis	44674.0	0	Felis catus	44674.0	0
scf7180000022169	2716	0.4091	0	433.758	no-hit	0.0	0	no-hit	0.0	0	no-hit	0.0	0	no-hit	0.0	0	no-hit	0.0	0	no-hit	0.0	0
scf7180000019371	183302	0.4017	0	46.9011	Eukaryota	38011.0	0	Chordata	38011.0	0	Carnivora	38011.0	0	Felidae	38011.0	0	Felis	34230.0	1	Felis catus	34230.0	1
scf7180000017579	3833756	0.4528	100	50.5951	Eukaryota	46719.0	0	Chordata	46719.0	0	Carnivora	46719.0	0	Felidae	46719.0	0	Felis	46719.0	0	Felis catus	46719.0	0
scf7180000020844	63754	0.3998	0	23.7718	Eukaryota	44661.0	0	Chordata	44661.0	0	Carnivora	44661.0	0	Felidae	44661.0	0	Felis	44661.0	0	Felis catus	44661.0	0
scf7180000023364	28127	0.5109	0	435.9161	no-hit	0.0	0	no-hit	0.0	0	no-hit	0.0	0	no-hit	0.0	0	no-hit	0.0	0	no-hit	0.0	0
scf7180000021109	103186	0.4145	0	27.4323	Eukaryota	69600.0	0	Chordata	69600.0	0	Carnivora	69600.0	0	Felidae	55498.0	1	Acinonyx	41628.0	2	Acinonyx jubatus	41628.0	2
scf7180000019761	225827	0.5041	0	51.0273	Eukaryota	6472.0	1	Chordata	6472.0	1	Artiodactyla	3037.0	4	Hominidae	2157.0	5	Homo	2157.0	6	Homo sapiens	2157.0	6
scf7180000019751	17531	0.6624	0	276.8832	Eukaryota	2542.0	0	Chordata	2542.0	0	Carnivora	2299.0	1	Felidae	2299.0	1	Felis	1673.0	3	Felis catus	1673.0	3
scf7180000021987	43407	0.3816	0	27.0008	Eukaryota	8775.0	0	Chordata	8775.0	0	Carnivora	8775.0	0	Felidae	7888.0	1	Felis	7888.0	1	Felis catus	7888.0	1
scf7180000020719	171825	0.4362	100	25.448	Eukaryota	13169.0	0	Chordata	13169.0	0	Carnivora	6240.0	3	Felidae	6240.0	3	Felis	6240.0	3	Felis catus	6240.0	3
scf7180000020270	160974	0.5096	0	50.4907	Eukaryota	19509.0	0	Chordata	19509.0	0	Carnivora	17874.0	1	Felidae	13238.0	2	Suricata	4636.0	5	Suricata suricatta	4636.0	6
scf7180000019160	391604	0.3481	0	47.3334	Eukaryota	32221.0	0	Chordata	32221.0	0	Carnivora	32221.0	0	Felidae	32221.0	0	Felis	29018.0	1	Felis catus	29018.0	1
scf7180000023298	27022	0.3838	0	227.8784	Eukaryota	25357.0	0	Chordata	25357.0	0	Carnivora	25357.0	0	Felidae	25357.0	0	Felis	22808.0	1	Felis catus	22808.0	1
scf7180000021829	30660	0.3776	0	23.6963	Eukaryota	18124.0	0	Chordata	18124.0	0	Carnivora	18124.0	0	Felidae	18124.0	0	Felis	14499.0	1	Felis catus	14499.0	1
scf7180000020082	245348	0.3877	0	49.6708	Eukaryota	47464.0	0	Chordata	47464.0	0	Carnivora	47464.0	0	Felidae	47464.0	0	Felis	47464.0	0	Felis catus	47464.0	0
scf7180000017909	1597114	0.4539	0	52.8941	Eukaryota	64282.0	0	Chordata	64282.0	0	Carnivora	64282.0	0	Felidae	52552.0	1	Felis	21970.0	4	Felis catus	21970.0	5
scf7180000021378	38855	0.3449	0	47.3815	Eukaryota	5734.0	0	Chordata	5734.0	0	Rodentia	1980.0	4	Muridae	1980.0	4	Mus	1980.0	4	Mus musculus	1980.0	4
scf7180000020220	9810	0.5083	0	24.0811	Eukaryota	16721.0	1	Chordata	16721.0	1	Carnivora	14284.0	3	Felidae	14284.0	3	Lynx	11160.0	6	Lynx canadensis	11160.0	6
scf7180000024145	206188	0.4624	0	51.1042	Eukaryota	19170.0	0	Chordata	19170.0	0	Carnivora	19170.0	0	Felidae	19170.0	0	Lynx	19170.0	0	Lynx canadensis	19170.0	0
scf7180000018091	1223426	0.3895	0	48.9874	Eukaryota	50687.0	0	Chordata	50687.0	0	Carnivora	50687.0	0	Felidae	50687.0	0	Felis	37595.0	2	Felis catus	37595.0	2
scf7180000021850	7659	0.5526	0	262.0549	Eukaryota	2012.0	0	Chordata	2012.0	0	Carnivora	2012.0	0	Felidae	2012.0	0	Felis	1279.0	2	Felis catus	1279.0	2
scf7180000023245	29303	0.3888	0	295.8091	Eukaryota	6888.0	0	Chordata	6888.0	0	Carnivora	6888.0	0	Felidae	6888.0	0	Felis	6888.0	0	Felis catus	6888.0	0
scf7180000020314	132447	0.4213	0	49.7332	Eukaryota	7198.0	0	Chordata	7198.0	0	Carnivora	6442.0	1	Felidae	6442.0	1	Felis	5730.0	2	Felis catus	5730.0	2
scf7180000017580	2101507	0.4087	0	51.4937	Eukaryota	45824.0	0	Chordata	45824.0	0	Carnivora	45824.0	0	Felidae	45824.0	0	Felis	45824.0	0	Felis catus	45824.0	0
scf7180000021444	61799	0.5462	0	25.3168	Eukaryota	32558.0	0	Chordata	32558.0	0	Artiodactyla	20205.0	1	Suidae	20205.0	1	Sus	20205.0	2	Sus scrofa	20205.0	2
scf7180000018379	915405	0.3649	0	50.4103	Eukaryota	50463.0	0	Chordata	50463.0	0	Carnivora	50463.0	0	Felidae	50463.0	0	Felis	50463.0	0	Felis catus	50463.0	0
scf7180000018614	28318	0.3729	0	47.1694	Eukaryota	43510.0	0	Chordata	43510.0	0	Carnivora	43510.0	0	Felidae	43510.0	0	Felis	39212.0	1	Felis catus	39212.0	1
scf7180000021806	16853	0.4038	0	22.5278	Eukaryota	14668.0	0	Chordata	14668.0	0	Carnivora	14668.0	0	Felidae	14668.0	0	Felis	11747.0	1	Felis catus	11747.0	1
scf7180000022044	23032	0.3829	0	26.5529	Eukaryota	35899.0	0	Chordata	35899.0	0	Carnivora	35899.0	0	Felidae	35899.0	0	Felis	35899.0	0	Felis catus	35899.0	0
scf7180000020199	103293	0.4902	0	49.5591	Eukaryota	14984.0	0	Chordata	14984.0	0	Carnivora	14984.0	0	Felidae	14984.0	0	Felis	13318.0	1	Felis catus	13318.0	1
scf7180000022712	12491	0.4058	0	25.2728	Eukaryota	9492.0	0	Chordata	9492.0	0	Primates	5411.0	3	Hominidae	5411.0	3	Homo	3606.0	4	Homo sapiens	3606.0	4
scf7180000021257	45532	0.3961	0	25.9907	Eukaryota	45792.0	0	Chordata	45792.0	0	Carnivora	45792.0	0	Felidae	45792.0	0	Felis	41267.0	1	Felis catus	41267.0	1
scf7180000022234	17856	0.3869	0	24.7483	Eukaryota	19800.0	0	Chordata	19800.0	0	Carnivora	19800.0	0	Felidae	19800.0	0	Felis	17801.0	1	Felis catus	17801.0	1
scf7180000018721	599896	0.4645	100	50.343	Eukaryota	27542.0	0	Chordata	27542.0	0	Carnivora	27542.0	0	Felidae	16790.0	3	Felis	5628.0	6	Felis catus	5628.0	7
scf7180000018470	4214	0.4089	0	27.7509	Eukaryota	7500.0	0	Chordata	7500.0	0	Carnivora	7500.0	0	Felidae	7500.0	0	Felis	6559.0	1	Felis catus	6559.0	1
scf7180000018643	1122161	0.4314	0	50.6486	Eukaryota	47892.0	0	Chordata	47892.0	0	Carnivora	47892.0	0	Felidae	47892.0	0	Felis	42965.0	1	Felis catus	42965.0	1
scf7180000023858	713747	0.4325	0	52.4963	Eukaryota	31836.0	0	Chordata	31836.0	0	Carnivora	31836.0	0	Felidae	31836.0	0	Panthera	19161.0	2	Panthera pardus	15960.0	3
scf7180000020394	67385	0.3998	0	44.4162	Eukaryota	46002.0	0	Chordata	46002.0	0	Carnivora	46002.0	0	Felidae	46002.0	0	Felis	41468.0	1	Felis catus	41468.0	1
scf7180000021797	16457	0.5557	0	52.7494	Eukaryota	2785.0	0	Chordata	2785.0	0	Carnivora	1477.0	2	Felidae	1477.0	2	Felis	1477.0	3	Felis catus	1477.0	3
scf7180000023716	13105	0.4069	0	263.0401	Eukaryota	14520.0	0	Chordata	14520.0	0	Carnivora	14520.0	0	Felidae	14520.0	0	Felis	11628.0	1	Felis catus	11628.0	1
scf7180000021898	33997	0.3862	0	24.8975	Eukaryota	44132.0	0	Chordata	44132.0	0	Carnivora	44132.0	0	Felidae	44132.0	0	Felis	39790.0	1	Felis catus	39790.0	1
scf7180000024244	200278	0.3991	0	49.5636	Eukaryota	39573.0	0	Chordata	39573.0	0	Carnivora	39573.0	0	Felidae	39573.0	0	Felis	35626.0	1	Felis catus	35626.0	1
scf7180000023369	69284	0.4273	0	98.1823	Eukaryota	2306.0	0	Chordata	2306.0	0	Carnivora	2306.0	0	Felidae	2306.0	0	Felis	1634.0	2	Felis catus	1634.0	2
scf7180000019901	160512	0.4804	0	50.3646	Eukaryota	15315.0	0	Chordata	15315.0	0	Carnivora	13222.0	1	Felidae	8382.0	5	Mustela	2542.0	8	Mustela putorius	2542.0	8
scf7180000018257	136363	0.4419	0	52.5276	Eukaryota	46262.0	0	Chordata	46262.0	0	Carnivora	46262.0	0	Felidae	46262.0	0	Felis	46262.0	0	Felis catus	46262.0	0
scf7180000020461	940276	0.4372	0	49.3165	Eukaryota	37534.0	0	Chordata	37534.0	0	Carnivora	37534.0	0	Felidae	37534.0	0	Felis	33823.0	1	Felis catus	33823.0	1
scf7180000020217	12165	0.3577	0	21.2809	Eukaryota	24001.0	0	Chordata	24001.0	0	Carnivora	24001.0	0	Felidae	24001.0	0	Felis	24001.0	0	Felis catus	24001.0	0
scf7180000020601	17374	0.4254	0	419.5729	Eukaryota	201644.0	0	Chordata	201644.0	0	Carnivora	201644.0	0	Hyaenidae	201644.0	0	Proteles	123739.0	1	Proteles cristata	123739.0	1
scf7180000017704	10217545	0.4197	0	51.0186	Eukaryota	70003.0	0	Chordata	70003.0	0	Carnivora	70003.0	0	Felidae	70003.0	0	Felis	56568.0	2	Felis catus	56568.0	2
scf7180000019388	148182	0.4372	0	44.0797	Eukaryota	13865.0	0	Chordata	13865.0	0	Carnivora	13865.0	0	Felidae	13865.0	0	Felis	12489.0	1	Felis catus	12489.0	1
scf7180000020155	209400	0.5904	0	48.2773	Eukaryota	31840.0	0	Chordata	31840.0	0	Carnivora	31840.0	0	Felidae	31840.0	0	Lynx	31840.0	0	Lynx canadensis	31840.0	0
scf7180000020037	114410	0.4321	0	48.4557	Eukaryota	22086.0	0	Chordata	22086.0	0	Carnivora	22086.0	0	Felidae	22086.0	0	Felis	15272.0	2	Felis catus	15272.0	2
scf7180000017484	155211	0.4275	0	50.9574	Eukaryota	47223.0	0	Chordata	47223.0	0	Carnivora	47223.0	0	Felidae	47223.0	0	Felis	47223.0	0	Felis catus	47223.0	0
scf7180000021203	84747	0.6242	0	52.3238	Eukaryota	5067.0	0	Chordata	5067.0	0	Carnivora	5067.0	0	Otariidae	2970.0	2	Zalophus	2491.0	3	Zalophus californianus	2491.0	3
scf7180000017709	23120	0.4334	0	34.6196	Eukaryota	27739.0	0	Chordata	27739.0	0	Carnivora	27739.0	0	Felidae	27739.0	0	Felis	24917.0	1	Felis catus	24917.0	1
scf7180000022815	14309	0.6423	0	28.2021	Eukaryota	20452.0	0	Chordata	20452.0	0	Primates	16430.0	2	Hominidae	16430.0	2	Homo	13975.0	3	Homo sapiens	13975.0	3
scf7180000019510	135008	0.3623	0	43.4726	Eukaryota	45823.0	0	Chordata	45823.0	0	Carnivora	45823.0	0	Felidae	45823.0	0	Felis	45823.0	0	Felis catus	45823.0	0
scf7180000020444	184212	0.3787	0	24.8569	Eukaryota	45298.0	0	Chordata	45298.0	0	Carnivora	45298.0	0	Felidae	45298.0	0	Felis	45298.0	0	Felis catus	45298.0	0
scf7180000017611	2936649	0.3605	0	49.1853	Eukaryota	46555.0	0	Chordata	46555.0	0	Carnivora	46555.0	0	Felidae	46555.0	0	Felis	46555.0	0	Felis catus	46555.0	0
scf7180000023855	1949502	0.4273	0	51.2599	Eukaryota	30192.0	0	Chordata	30192.0	0	Carnivora	30192.0	0	Felidae	30192.0	0	Lynx	30192.0	0	Lynx canadensis	30192.0	0
scf7180000021296	72234	0.3994	0	25.3462	Eukaryota	32690.0	0	Chordata	32690.0	0	Carnivora	32690.0	0	Felidae	22850.0	1	Panthera	13180.0	3	Suricata suricatta	9840.0	4
scf7180000018812	498261	0.3673	0	49.5798	Eukaryota	37372.0	0	Chordata	37372.0	0	Carnivora	37372.0	0	Felidae	37372.0	0	Felis	37372.0	0	Felis catus	37372.0	0
scf7180000019134	1607420	0.4496	0	51.7865	Eukaryota	88188.0	0	Chordata	88188.0	0	Carnivora	53504.0	1	Felidae	35148.0	2	Felis	35148.0	2	Felis catus	35148.0	2
scf7180000022982	36268	0.5325	0	691.8771	Eukaryota	12122.0	0	Chordata	12122.0	0	Carnivora	12122.0	0	Felidae	12122.0	0	Felis	12122.0	0	Felis catus	12122.0	0
scf7180000023816	1717503	0.4293	0	51.2159	Eukaryota	52490.0	0	Chordata	52490.0	0	Carnivora	52490.0	0	Felidae	52490.0	0	Felis	52490.0	0	Felis catus	52490.0	0
scf7180000018415	2939148	0.3977	100	50.6448	Eukaryota	96071.0	0	Chordata	96071.0	0	Carnivora	96071.0	0	Felidae	41727.0	4	Panthera	25084.0	7	Panthera pardus	16740.0	8
scf7180000017545	2701704	0.4095	0	51.6024	Eukaryota	45307.0	0	Chordata	45307.0	0	Carnivora	45307.0	0	Felidae	45307.0	0	Felis	45307.0	0	Felis catus	45307.0	0
scf7180000024190	102932	0.3711	0	23.6792	Eukaryota	42317.0	0	Chordata	42317.0	0	Carnivora	42317.0	0	Felidae	42317.0	0	Felis	42317.0	0	Felis catus	42317.0	0
scf7180000018882	475052	0.4403	0	50.7467	Eukaryota	46512.0	0	Chordata	46512.0	0	Carnivora	46512.0	0	Felidae	46512.0	0	Felis	46512.0	0	Felis catus	46512.0	0
scf7180000022970	32175	0.536	0	285.4122	Eukaryota	2452.0	0	Chordata	2452.0	0	Carnivora	2452.0	0	Felidae	2224.0	1	Felis	1010.0	5	Felis catus	1010.0	5
scf7180000018557	105785	0.4653	0	48.2372	Eukaryota	31743.0	0	Chordata	31743.0	0	Carnivora	31743.0	0	Felidae	31743.0	0	Felis	28522.0	1	Felis catus	28522.0	1
scf7180000021526	55430	0.3542	0	22.9481	Eukaryota	42901.0	0	Chordata	42901.0	0	Carnivora	42901.0	0	Felidae	42901.0	0	Felis	42901.0	0	Felis catus	42901.0	0
scf7180000023013	50297	0.4094	0	463.9914	Eukaryota	6583.0	0	Chordata	6583.0	0	Carnivora	6583.0	0	Felidae	6583.0	0	Felis	6583.0	0	Felis catus	6583.0	0
scf7180000019506	573961	0.456	0	53.167	Eukaryota	23530.0	0	Chordata	23530.0	0	Carnivora	23530.0	0	Felidae	23530.0	0	Felis	9605.0	3	Felis catus	9605.0	3
scf7180000021261	59968	0.3839	0	31.711	Eukaryota	47360.0	0	Chordata	47360.0	0	Carnivora	47360.0	0	Felidae	47360.0	0	Felis	47360.0	0	Felis catus	47360.0	0
scf7180000018676	512683	0.3749	0	48.8363	Eukaryota	39760.0	0	Chordata	39760.0	0	Carnivora	39760.0	0	Felidae	33826.0	1	Felis	33826.0	1	Felis catus	33826.0	1
scf7180000017792	79055	0.601	0	47.5788	Eukaryota	14947.0	0	Chordata	14947.0	0	Carnivora	14947.0	0	Felidae	14947.0	0	Felis	14947.0	0	Felis catus	14947.0	0
scf7180000018560	32835	0.3947	0	26.7133	Eukaryota	31370.0	0	Chordata	31370.0	0	Carnivora	31370.0	0	Felidae	31370.0	0	Felis	28273.0	1	Felis catus	28273.0	1
scf7180000019827	271815	0.4104	100	45.3882	Eukaryota	27600.0	0	Chordata	27600.0	0	Carnivora	27600.0	0	Felidae	27600.0	0	Felis	21933.0	2	Felis catus	21933.0	2
scf7180000019083	605897	0.4103	0	49.1956	Eukaryota	47239.0	0	Chordata	47239.0	0	Carnivora	47239.0	0	Felidae	47239.0	0	Felis	47239.0	0	Felis catus	47239.0	0
scf7180000019773	22111	0.385	0	24.8885	Eukaryota	24842.0	0	Chordata	24842.0	0	Carnivora	24842.0	0	Felidae	24842.0	0	Felis	22954.0	1	Felis catus	22954.0	1
scf7180000022672	17697	0.3848	0	22.8799	Eukaryota	40461.0	0	Chordata	40461.0	0	Carnivora	40461.0	0	Felidae	40461.0	0	Felis	40461.0	0	Felis catus	40461.0	0
scf7180000021176	46168	0.3618	0	23.223	Eukaryota	37282.0	0	Chordata	37282.0	0	Carnivora	37282.0	0	Felidae	37282.0	0	Felis	37282.0	0	Felis catus	37282.0	0
scf7180000021561	35109	0.3575	0	25.0994	Eukaryota	59952.0	0	Chordata	59952.0	0	Carnivora	59952.0	0	Felidae	59952.0	0	Panthera	47992.0	1	Panthera pardus	47992.0	1
scf7180000017888	1607486	0.3535	0	49.4216	Eukaryota	46249.0	0	Chordata	46249.0	0	Carnivora	46249.0	0	Felidae	46249.0	0	Felis	46249.0	0	Felis catus	46249.0	0
scf7180000021618	40040	0.3689	0	27.7167	Eukaryota	19531.0	0	Chordata	19531.0	0	Carnivora	19531.0	0	Felidae	19531.0	0	Felis	17508.0	1	Felis catus	17508.0	1
scf7180000018228	640058	0.4106	0	52.9227	Eukaryota	31869.0	0	Chordata	31869.0	0	Carnivora	29383.0	1	Felidae	20627.0	5	Felis	14055.0	8	Felis catus	14055.0	8
scf7180000018745	602406	0.401	0	51.1828	Eukaryota	43705.0	0	Chordata	43705.0	0	Carnivora	43705.0	0	Felidae	24745.0	2	Acinonyx	19792.0	4	Acinonyx jubatus	19792.0	4
scf7180000023008	83426	0.5052	0	389.5472	Eukaryota	21794.0	0	Chordata	21794.0	0	Carnivora	21794.0	0	Felidae	21794.0	0	Felis	21794.0	0	Felis catus	21794.0	0
scf7180000022248	19756	0.6249	0	51.4638	Eukaryota	3027.0	0	Chordata	3027.0	0	Carnivora	3027.0	0	Felidae	2768.0	1	Felis	2268.0	2	Felis catus	2268.0	2
scf7180000018214	74988	0.3662	0	44.0814	Eukaryota	46034.0	0	Chordata	46034.0	0	Carnivora	46034.0	0	Felidae	46034.0	0	Felis	46034.0	0	Felis catus	46034.0	0
scf7180000017944	351046	0.3867	0	49.3696	Eukaryota	32480.0	0	Chordata	32480.0	0	Carnivora	24227.0	2	Felidae	18080.0	4	Panthera	7992.0	8	Acinonyx jubatus	4043.0	9
scf7180000022597	14804	0.6558	0	44.6461	Eukaryota	4354.0	0	Chordata	4354.0	0	Primates	1940.0	4	Hominidae	1577.0	5	Homo	1577.0	5	Homo sapiens	1577.0	5
scf7180000020675	54004	0.6077	0	49.0306	Eukaryota	42380.0	0	Chordata	42380.0	0	Carnivora	42380.0	0	Otariidae	20603.0	2	Callorhinus	12343.0	6	Callorhinus ursinus	12343.0	6
scf7180000022564	29814	0.3864	0	332.4161	Eukaryota	9977.0	0	Chordata	9977.0	0	Apterygiformes	8924.0	1	Apterygidae	8924.0	1	Apteryx	8924.0	1	Apteryx mantelli	8924.0	1
scf7180000019131	385424	0.3956	0	51.9477	Eukaryota	73149.0	0	Chordata	73149.0	0	Carnivora	73149.0	0	Felidae	73149.0	0	Acinonyx	69957.0	1	Acinonyx jubatus	69957.0	1
scf7180000024020	452214	0.4821	0	50.85	Eukaryota	46499.0	0	Chordata	46499.0	0	Carnivora	46499.0	0	Felidae	46499.0	0	Felis	46499.0	0	Felis catus	46499.0	0
scf7180000017927	740082	0.3676	0	47.7013	Eukaryota	45481.0	0	Chordata	45481.0	0	Carnivora	45481.0	0	Felidae	45481.0	0	Felis	45481.0	0	Felis catus	45481.0	0
scf7180000017527	1328143	0.3738	0	50.1709	Eukaryota	47115.0	0	Chordata	47115.0	0	Carnivora	47115.0	0	Felidae	47115.0	0	Felis	47115.0	0	Felis catus	47115.0	0
scf7180000018368	1702409	0.3753	0	50.3966	Eukaryota	51414.0	0	Chordata	51414.0	0	Carnivora	51414.0	0	Felidae	51414.0	0	Felis	51414.0	0	Felis catus	51414.0	0
scf7180000020737	48775	0.4305	0	167.7881	Eukaryota	2349.0	0	Chordata	2349.0	0	Carnivora	2349.0	0	Felidae	2349.0	0	Felis	1690.0	2	Felis catus	1690.0	2
scf7180000019359	8160	0.4211	0	23.7488	Eukaryota	2336.0	0	Chordata	2336.0	0	Carnivora	2336.0	0	Felidae	1836.0	2	Felis	925.0	4	Felis catus	925.0	6
scf7180000017427	2184763	0.4154	0	51.2836	Eukaryota	46736.0	0	Chordata	46736.0	0	Carnivora	46736.0	0	Felidae	46736.0	0	Felis	46736.0	0	Felis catus	46736.0	0
scf7180000019281	50752	0.526	0	201.4036	Eukaryota	12347.0	0	Chordata	12347.0	0	Carnivora	12347.0	0	Felidae	12347.0	0	Felis	12347.0	0	Felis catus	12347.0	0
scf7180000017943	1176852	0.409	100	51.6735	Eukaryota	27800.0	0	Chordata	27800.0	0	Carnivora	27800.0	0	Felidae	22815.0	1	Felis	20281.0	2	Felis catus	20281.0	2
scf7180000024268	3129060	0.3704	0	49.6096	Eukaryota	75091.0	0	Chordata	75091.0	0	Carnivora	75091.0	0	Felidae	60247.0	1	Acinonyx	30083.0	3	Acinonyx jubatus	30083.0	3
scf7180000021167	86582	0.4088	0	26.4628	Eukaryota	43228.0	0	Chordata	43228.0	0	Carnivora	43228.0	0	Felidae	43228.0	0	Felis	38869.0	1	Felis catus	38869.0	1
scf7180000022219	14291	0.6403	0	52.5613	Eukaryota	2980.0	0	Chordata	2980.0	0	Carnivora	2980.0	0	Felidae	2980.0	0	Felis	2980.0	0	Felis catus	2980.0	0
scf7180000022520	13816	0.423	0	24.1478	Eukaryota	10707.0	0	Chordata	10707.0	0	Carnivora	10707.0	0	Felidae	10707.0	0	Felis	10707.0	0	Felis catus	10707.0	0
scf7180000019987	192384	0.4483	0	51.1991	Eukaryota	10223.0	0	Chordata	10223.0	0	Primates	4415.0	2	Hominidae	4415.0	4	Homo	4415.0	5	Homo sapiens	4415.0	5
scf7180000019233	48012	0.4343	0	71.1119	Eukaryota	3279.0	0	Chordata	3279.0	0	Perissodactyla	1691.0	2	Equidae	1691.0	2	Equus	1691.0	3	Equus caballus	1404.0	4
scf7180000023773	2589175	0.3996	0	50.8897	Eukaryota	48390.0	0	Chordata	48390.0	0	Carnivora	48390.0	0	Felidae	48390.0	0	Panthera	48390.0	0	Panthera pardus	48390.0	0
scf7180000022043	20344	0.5447	0	50.4265	Eukaryota	13237.0	0	Chordata	13237.0	0	Carnivora	13237.0	0	Felidae	10728.0	2	Panthera	5205.0	4	Panthera pardus	5205.0	4
scf7180000018911	527977	0.4203	0	51.1587	Eukaryota	26099.0	0	Chordata	26099.0	0	Carnivora	26099.0	0	Felidae	26099.0	0	Felis	20030.0	1	Felis catus	20030.0	1
scf7180000019099	17819	0.3866	0	31.1472	Eukaryota	43956.0	0	Chordata	43956.0	0	Carnivora	43956.0	0	Felidae	43956.0	0	Felis	39621.0	1	Felis catus	39621.0	1
scf7180000020387	111007	0.4822	0	48.7405	Eukaryota	9854.0	0	Chordata	9854.0	0	Carnivora	9854.0	0	Canidae	5256.0	3	Vulpes	5256.0	4	Vulpes vulpes	5256.0	4
scf7180000021230	58955	0.5375	0	49.1426	Eukaryota	4897.0	0	Chordata	4897.0	0	Rodentia	1308.0	5	Muridae	1308.0	6	Mus	1308.0	7	Mus musculus	1308.0	7
scf7180000018958	518931	0.3794	0	25.5752	Eukaryota	46161.0	0	Chordata	46161.0	0	Carnivora	29531.0	3	Felidae	18533.0	5	Vulpes	7158.0	8	Vulpes vulpes	7158.0	8
scf7180000022650	12043	0.4191	0	25.4731	Eukaryota	15642.0	0	Chordata	15642.0	0	Carnivora	15642.0	0	Felidae	15642.0	0	Panthera	9330.0	1	Panthera pardus	9330.0	1
scf7180000022014	35055	0.3638	0	24.7356	Eukaryota	39046.0	0	Chordata	39046.0	0	Carnivora	39046.0	0	Felidae	39046.0	0	Felis	35166.0	1	Felis catus	35166.0	1
scf7180000024055	93288	0.3697	0	21.6767	Eukaryota	22537.0	0	Chordata	22537.0	0	Carnivora	22537.0	0	Felidae	22537.0	0	Felis	17760.0	1	Felis catus	17760.0	1
scf7180000018453	683256	0.5313	0	50.3015	Eukaryota	30354.0	0	Chordata	30354.0	0	Artiodactyla	23834.0	1	Bovidae	23834.0	1	Bos	14869.0	5	Bos mutus	5981.0	8
scf7180000021381	49044	0.4605	0	26.5468	Eukaryota	86734.0	0	Chordata	86734.0	0	Carnivora	86734.0	0	Felidae	53462.0	1	Lynx	35592.0	2	Lynx canadensis	35592.0	2
scf7180000022326	29188	0.4343	0	33.693	Eukaryota	24956.0	0	Chordata	24956.0	0	Carnivora	24956.0	0	Felidae	24956.0	0	Felis	22409.0	1	Felis catus	22409.0	1
scf7180000022137	22852	0.3614	0	23.3883	Eukaryota	7894.0	0	Chordata	7894.0	0	Carnivora	7894.0	0	Felidae	7894.0	0	Felis	7894.0	0	Felis catus	7894.0	0
scf7180000019693	215240	0.4657	0	50.6976	Eukaryota	40672.0	0	Chordata	40672.0	0	Carnivora	40672.0	0	Felidae	24312.0	1	Lynx	24312.0	1	Lynx canadensis	24312.0	1
scf7180000019162	398439	0.3528	0	48.4103	Eukaryota	24904.0	0	Chordata	24904.0	0	Carnivora	24904.0	0	Felidae	24904.0	0	Felis	19704.0	1	Felis catus	19704.0	1
scf7180000019880	237798	0.3576	0	49.3869	Eukaryota	10784.0	0	Chordata	10784.0	0	Carnivora	9467.0	1	Felidae	9467.0	1	Felis	7388.0	2	Felis catus	7388.0	2
scf7180000019427	389641	0.5197	0	50.5496	Eukaryota	19099.0	0	Chordata	19099.0	0	Carnivora	19099.0	0	Felidae	19099.0	0	Felis	15299.0	1	Felis catus	15299.0	1
scf7180000022862	68230	0.6539	0	74.0932	Eukaryota	11778.0	0	Chordata	11778.0	0	Carnivora	11778.0	0	Felidae	7380.0	2	Felis	7380.0	2	Felis catus	7380.0	2
scf7180000021812	65993	0.3597	100	23.6143	Eukaryota	25192.0	0	Chordata	25192.0	0	Carnivora	25192.0	0	Felidae	25192.0	0	Felis	22615.0	1	Felis catus	22615.0	1
scf7180000018461	70992	0.3981	0	44.5197	Eukaryota	47186.0	0	Chordata	47186.0	0	Carnivora	47186.0	0	Felidae	47186.0	0	Felis	47186.0	0	Felis catus	47186.0	0
scf7180000020222	93155	0.5134	0	47.9332	Eukaryota	19494.0	0	Chordata	19494.0	0	Carnivora	19494.0	0	Felidae	19494.0	0	Felis	17575.0	1	Felis catus	17575.0	1
scf7180000019174	341332	0.3823	0	49.675	Eukaryota	62869.0	0	Chordata	62869.0	0	Carnivora	62869.0	0	Felidae	23488.0	5	Suricata	7890.0	9	Suricata suricatta	7890.0	9
scf7180000023695	951942	0.442	0	53.5604	Eukaryota	39998.0	0	Chordata	39998.0	0	Carnivora	39998.0	0	Felidae	23730.0	1	Suricata	16268.0	2	Suricata suricatta	16268.0	2
scf7180000020479	86491	0.6181	0	46.6602	Eukaryota	9217.0	0	Chordata	9217.0	0	Carnivora	9217.0	0	Felidae	7805.0	2	Felis	5810.0	3	Felis catus	5810.0	3
scf7180000019270	246267	0.3654	0	49.8734	Eukaryota	36343.0	0	Chordata	36343.0	0	Carnivora	36343.0	0	Otariidae	34344.0	1	Zalophus	34344.0	1	Zalophus californianus	34344.0	1
scf7180000019222	4043811	0.3627	100	48.9667	Eukaryota	50941.0	0	Chordata	50941.0	0	Carnivora	50941.0	0	Felidae	42293.0	1	Felis	42293.0	1	Felis catus	42293.0	1
scf7180000023475	21039	0.4832	0	142.4235	no-hit	0.0	0	no-hit	0.0	0	no-hit	0.0	0	no-hit	0.0	0	no-hit	0.0	0	no-hit	0.0	0
scf7180000020087	148678	0.5782	0	50.6554	Eukaryota	6020.0	1	Chordata	6020.0	1	Carnivora	2506.0	4	Felidae	2506.0	4	Felis	1390.0	7	Felis catus	1390.0	7
scf7180000021706	31544	0.3593	0	22.0985	Eukaryota	40536.0	0	Chordata	40536.0	0	Carnivora	40536.0	0	Felidae	40536.0	0	Felis	40536.0	0	Felis catus	40536.0	0
scf7180000020168	229955	0.3971	0	24.1841	Eukaryota	9444.0	0	Chordata	9444.0	0	Carnivora	9444.0	0	Felidae	9444.0	0	Felis	9444.0	0	Felis catus	9444.0	0
scf7180000021072	69784	0.3979	100	25.2864	Eukaryota	30319.0	0	Chordata	30319.0	0	Carnivora	30319.0	0	Felidae	30319.0	0	Felis	27271.0	1	Felis catus	27271.0	1
scf7180000018215	1064613	0.3751	0	50.7873	Eukaryota	39201.0	0	Chordata	39201.0	0	Carnivora	39201.0	0	Felidae	35232.0	1	Felis	31328.0	2	Felis catus	31328.0	2
scf7180000024218	42187	0.4432	0	24.6371	Eukaryota	15577.0	0	Chordata	15577.0	0	Primates	11980.0	3	Hominidae	9390.0	5	Homo	9390.0	5	Homo sapiens	9390.0	5
scf7180000019599	342201	0.5036	0	51.8061	Eukaryota	31377.0	0	Chordata	31377.0	0	Carnivora	31377.0	0	Felidae	31377.0	0	Puma	11992.0	3	Puma concolor	11992.0	3
scf7180000022853	28558	0.4885	0	476.8555	no-hit	0.0	0	no-hit	0.0	0	no-hit	0.0	0	no-hit	0.0	0	no-hit	0.0	0	no-hit	0.0	0
scf7180000017675	1801277	0.4436	0	51.9488	Eukaryota	49665.0	0	Chordata	49665.0	0	Carnivora	49665.0	0	Felidae	49665.0	0	Felis	49665.0	0	Felis catus	49665.0	0
scf7180000023466	23268	0.4874	0	274.9455	Eukaryota	9292.0	0	Chordata	9292.0	0	Carnivora	9292.0	0	Felidae	9292.0	0	Felis	9292.0	0	Felis catus	9292.0	0
scf7180000022180	37234	0.4424	0	33.9666	Eukaryota	6092.0	0	Chordata	6092.0	0	Carnivora	6092.0	0	Felidae	6092.0	0	Felis	2823.0	2	Felis catus	2823.0	2
scf7180000018731	1197692	0.4391	0	50.8724	Eukaryota	46098.0	0	Chordata	46098.0	0	Carnivora	46098.0	0	Felidae	46098.0	0	Felis	46098.0	0	Felis catus	46098.0	0
scf7180000021280	51374	0.3839	0	25.2536	Eukaryota	32496.0	0	Chordata	32496.0	0	Carnivora	32496.0	0	Felidae	32496.0	0	Felis	29223.0	1	Felis catus	29223.0	1
scf7180000023934	128975	0.3591	0	50.3985	Eukaryota	31469.0	0	Chordata	31469.0	0	Carnivora	31469.0	0	Felidae	31469.0	0	Felis	28264.0	1	Felis catus	28264.0	1
scf7180000021929	13854	0.5213	0	219.137	no-hit	0.0	0	no-hit	0.0	0	no-hit	0.0	0	no-hit	0.0	0	no-hit	0.0	0	no-hit	0.0	0
scf7180000018739	1442463	0.3547	0	49.8507	Eukaryota	62941.0	0	Chordata	62941.0	0	Artiodactyla	47609.0	1	Monodontidae	24118.0	5	Delphinapterus	24118.0	5	Delphinapterus leucas	24118.0	5
scf7180000020933	54828	0.3719	0	25.9739	Eukaryota	39246.0	0	Chordata	39246.0	0	Carnivora	39246.0	0	Felidae	39246.0	0	Felis	39246.0	0	Felis catus	39246.0	0
scf7180000023731	7652	0.6373	0	92.8276	Eukaryota	2454.0	0	Chordata	2454.0	0	Carnivora	2217.0	1	Felidae	1993.0	2	Felis	1366.0	4	Felis catus	1366.0	4
scf7180000022141	23459	0.4571	0	46.0042	Eukaryota	6228.0	0	Chordata	6228.0	0	Carnivora	6228.0	0	Felidae	6228.0	0	Felis	5607.0	1	Felis catus	5607.0	1
scf7180000020044	86546	0.6519	0	46.8479	Eukaryota	9851.0	0	Chordata	9851.0	0	Carnivora	9851.0	0	Felidae	5887.0	1	Suricata	3964.0	5	Suricata suricatta	3964.0	5
scf7180000020021	146532	0.3594	0	47.9237	Eukaryota	46027.0	0	Chordata	46027.0	0	Carnivora	46027.0	0	Felidae	46027.0	0	Felis	46027.0	0	Felis catus	46027.0	0
scf7180000020194	298018	0.5497	0	48.2154	Eukaryota	15169.0	0	Chordata	15169.0	0	Primates	7934.0	2	Hominidae	4186.0	4	Felis	3597.0	7	Felis catus	3597.0	7
scf7180000018778	2680074	0.4307	0	51.0792	Eukaryota	112720.0	0	Chordata	112720.0	0	Carnivora	112720.0	0	Felidae	51505.0	2	Zalophus	49599.0	3	Zalophus californianus	49599.0	3
scf7180000017905	1352522	0.4334	0	51.4843	Eukaryota	55343.0	0	Chordata	55343.0	0	Carnivora	55343.0	0	Felidae	55343.0	0	Felis	41307.0	2	Felis catus	41307.0	2
scf7180000020729	92364	0.5098	0	49.7693	Eukaryota	46704.0	0	Chordata	46704.0	0	Carnivora	46704.0	0	Felidae	46704.0	0	Felis	46704.0	0	Felis catus	46704.0	0
scf7180000019605	246706	0.529	0	47.8675	Eukaryota	16118.0	0	Chordata	16118.0	0	Carnivora	14546.0	1	Felidae	14546.0	1	Felis	14546.0	1	Felis catus	14546.0	1
scf7180000017526	1290611	0.3571	0	48.2714	Eukaryota	46828.0	0	Chordata	46828.0	0	Carnivora	46828.0	0	Felidae	46828.0	0	Felis	46828.0	0	Felis catus	46828.0	0
scf7180000017844	3105628	0.3615	100	49.2861	Eukaryota	47028.0	0	Chordata	47028.0	0	Carnivora	47028.0	0	Felidae	42649.0	1	Felis	42649.0	1	Felis catus	42649.0	1
scf7180000019931	20987	0.6606	0	38.6335	Eukaryota	11209.0	0	Chordata	11209.0	0	Carnivora	11209.0	0	Felidae	11209.0	0	Panthera	4604.0	3	Panthera pardus	4604.0	3
scf7180000023366	27552	0.6965	0	113.1083	no-hit	0.0	0	no-hit	0.0	0	no-hit	0.0	0	no-hit	0.0	0	no-hit	0.0	0	no-hit	0.0	0
scf7180000019818	196706	0.4781	0	48.7166	Eukaryota	13558.0	0	Chordata	13558.0	0	Artiodactyla	5147.0	2	Bovidae	4005.0	4	Homo	3858.0	5	Homo sapiens	3858.0	5
scf7180000021544	51778	0.3682	0	28.2544	Eukaryota	42672.0	0	Chordata	42672.0	0	Carnivora	42672.0	0	Felidae	42672.0	0	Felis	42672.0	0	Felis catus	42672.0	0
scf7180000017524	1787209	0.3409	0	47.1832	Eukaryota	31996.0	0	Chordata	31996.0	0	Carnivora	31996.0	0	Felidae	31996.0	0	Felis	28749.0	1	Felis catus	28749.0	1
scf7180000019035	379930	0.3902	0	51.2068	Eukaryota	13124.0	0	Chordata	13124.0	0	Carnivora	13124.0	0	Felidae	13124.0	0	Felis	11773.0	1	Felis catus	11773.0	1
scf7180000023817	1874823	0.3768	0	51.4388	Eukaryota	296732.0	0	Chordata	296732.0	0	Carnivora	201038.0	1	Felidae	172069.0	2	Puma	143405.0	3	Puma concolor	143405.0	3
scf7180000022825	342911	0.3987	0	53.0243	Eukaryota	46515.0	0	Chordata	46515.0	0	Carnivora	46515.0	0	Felidae	46515.0	0	Felis	46515.0	0	Felis catus	46515.0	0
scf7180000018604	23225	0.4262	0	50.0269	Eukaryota	20173.0	0	Chordata	20173.0	0	Carnivora	20173.0	0	Felidae	20173.0	0	Felis	18141.0	1	Felis catus	18141.0	1
scf7180000017941	1434136	0.3965	0	51.0176	Eukaryota	45834.0	0	Chordata	45834.0	0	Carnivora	45834.0	0	Felidae	45834.0	0	Felis	45834.0	0	Felis catus	45834.0	0
scf7180000020450	42189	0.5105	0	49.0929	Eukaryota	10853.0	0	Chordata	10853.0	0	Carnivora	10156.0	1	Felidae	9465.0	2	Panthera	4755.0	3	Panthera pardus	4755.0	3
scf7180000024186	85719	0.6041	0	50.7011	Eukaryota	15770.0	0	Chordata	15770.0	0	Carnivora	15770.0	0	Felidae	15770.0	0	Lynx	7900.0	1	Lynx canadensis	7900.0	1
scf7180000023967	739870	0.4193	0	49.799	Eukaryota	101292.0	0	Chordata	101292.0	0	Carnivora	101292.0	0	Felidae	101292.0	0	Panthera	60900.0	1	Panthera pardus	60900.0	1
scf7180000017764	1908829	0.4325	0	52.5095	Eukaryota	44195.0	0	Chordata	44195.0	0	Carnivora	44195.0	0	Felidae	31324.0	1	Suricata	12871.0	5	Suricata suricatta	12871.0	5
scf7180000017920	1466746	0.3618	0	49.1718	Eukaryota	46639.0	0	Chordata	46639.0	0	Carnivora	46639.0	0	Felidae	46639.0	0	Felis	41900.0	1	Felis catus	41900.0	1
scf7180000019496	334496	0.4258	0	49.7816	Eukaryota	24511.0	0	Chordata	24511.0	0	Carnivora	24511.0	0	Felidae	24511.0	0	Felis	10392.0	4	Felis catus	10392.0	5
scf7180000021161	55977	0.3701	0	26.0509	Eukaryota	45372.0	0	Chordata	45372.0	0	Carnivora	45372.0	0	Felidae	45372.0	0	Felis	45372.0	0	Felis catus	45372.0	0
scf7180000018570	670164	0.3596	0	49.0624	Eukaryota	30555.0	0	Chordata	30555.0	0	Artiodactyla	18113.0	1	Bovidae	18113.0	3	Bos	9647.0	7	Suricata suricatta	4148.0	9
scf7180000020136	268853	0.4672	0	25.3984	Eukaryota	36362.0	0	Chordata	36362.0	0	Carnivora	36362.0	0	Felidae	36362.0	0	Felis	32735.0	1	Felis catus	32735.0	1
scf7180000017983	1919985	0.4036	0	51.2566	Eukaryota	47823.0	0	Chordata	47823.0	0	Carnivora	47823.0	0	Felidae	47823.0	0	Felis	47823.0	0	Felis catus	47823.0	0
scf7180000020308	110522	0.4091	0	50.5163	Eukaryota	49332.0	0	Chordata	49332.0	0	Carnivora	49332.0	0	Phocidae	14838.0	3	Neomonachus	14838.0	4	Neomonachus schauinslandi	14838.0	4
scf7180000022042	20847	0.4713	0	46.1824	Eukaryota	2265.0	0	Chordata	2265.0	0	Carnivora	2265.0	0	Felidae	2032.0	1	Felis	1582.0	2	Felis catus	1582.0	2
scf7180000021855	29858	0.4951	0	27.9178	Eukaryota	5672.0	0	Chordata	5127.0	1	Primates	3507.0	3	Hominidae	3507.0	4	Homo	2712.0	5	Homo sapiens	2712.0	5
scf7180000017932	83313	0.4075	0	46.2076	Eukaryota	43848.0	0	Chordata	43848.0	0	Carnivora	43848.0	0	Felidae	43848.0	0	Felis	43848.0	0	Felis catus	43848.0	0
scf7180000018772	493052	0.476	0	50.1089	Eukaryota	46351.0	0	Chordata	46351.0	0	Carnivora	46351.0	0	Felidae	46351.0	0	Felis	46351.0	0	Felis catus	46351.0	0
scf7180000023375	14833	0.504	0	173.5968	Eukaryota	7090.0	0	Chordata	7090.0	0	Carnivora	7090.0	0	Felidae	7090.0	0	Felis	7090.0	0	Felis catus	7090.0	0
scf7180000022375	33992	0.3748	0	18.7159	Eukaryota	19993.0	0	Chordata	19993.0	0	Carnivora	19993.0	0	Felidae	19993.0	0	Felis	17978.0	1	Felis catus	17978.0	1
scf7180000019382	224201	0.6125	0	50.6776	Eukaryota	28129.0	0	Chordata	28129.0	0	Carnivora	28129.0	0	Felidae	28129.0	0	Felis	25587.0	1	Felis catus	25587.0	1
scf7180000021744	64818	0.4206	0	26.5432	Eukaryota	45851.0	0	Chordata	45851.0	0	Carnivora	45851.0	0	Felidae	45851.0	0	Felis	45851.0	0	Felis catus	45851.0	0
scf7180000021110	91170	0.3993	0	27.3259	Eukaryota	36942.0	0	Chordata	36942.0	0	Carnivora	36942.0	0	Felidae	36942.0	0	Felis	36942.0	0	Felis catus	36942.0	0
scf7180000018701	32302	0.3828	0	24.9206	Eukaryota	24515.0	0	Chordata	24515.0	0	Carnivora	24515.0	0	Felidae	24515.0	0	Felis	22053.0	1	Felis catus	22053.0	1
scf7180000024062	482459	0.4403	0	50.4837	Eukaryota	25371.0	0	Chordata	25371.0	0	Carnivora	25371.0	0	Felidae	25371.0	0	Felis	20515.0	1	Felis catus	20515.0	1
scf7180000019512	170004	0.401	0	24.6356	Eukaryota	16889.0	0	Chordata	16889.0	0	Carnivora	16889.0	0	Felidae	14412.0	1	Felis	9201.0	4	Felis catus	9201.0	4
scf7180000024263	86804	0.61	0	50.9556	Eukaryota	3666.0	0	Chordata	3666.0	0	Carnivora	3066.0	1	Felidae	1935.0	2	Felis	1137.0	4	Felis catus	1137.0	5
scf7180000021590	34711	0.3837	0	25.5119	Eukaryota	5204.0	0	Chordata	5204.0	0	Carnivora	1853.0	2	Hominidae	1810.0	3	Sus	1541.0	5	Sus scrofa	1541.0	5
scf7180000019984	173611	0.4287	0	26.6941	Eukaryota	13881.0	0	Chordata	13881.0	0	Primates	7662.0	3	Hominidae	7662.0	3	Homo	7662.0	4	Homo sapiens	7662.0	4
scf7180000019395	301825	0.6084	0	51.0136	Eukaryota	21836.0	0	Chordata	21836.0	0	Carnivora	19893.0	1	Phocidae	7123.0	5	Neomonachus	4748.0	8	Neomonachus schauinslandi	4748.0	8
scf7180000023665	64633	0.3861	0	270.9974	Eukaryota	7156.0	0	Chordata	7156.0	0	Carnivora	7156.0	0	Felidae	7156.0	0	Felis	6455.0	1	Felis catus	6455.0	1
scf7180000022383	11809	0.49	0	26.1875	Eukaryota	14492.0	0	Chordata	14492.0	0	Primates	9442.0	3	Hominidae	9442.0	4	Homo	5009.0	6	Homo sapiens	5009.0	6
scf7180000019269	278369	0.3604	0	48.6501	Eukaryota	48280.0	0	Chordata	48280.0	0	Carnivora	48280.0	0	Felidae	48280.0	0	Felis	48280.0	0	Felis catus	48280.0	0
scf7180000022774	7313	0.3497	0	22.6244	Eukaryota	2260.0	0	Chordata	2260.0	0	Carnivora	1886.0	1	Felidae	1886.0	1	Felis	1456.0	2	Felis catus	1456.0	2
scf7180000022980	40435	0.5686	0	95.7609	Eukaryota	6267.0	0	Chordata	6267.0	0	Carnivora	6267.0	0	Felidae	3596.0	3	Ursus	894.0	9	Ursus arctos	894.0	9
scf7180000018722	691428	0.3998	0	51.0187	Eukaryota	47220.0	0	Chordata	47220.0	0	Carnivora	47220.0	0	Felidae	47220.0	0	Felis	47220.0	0	Felis catus	47220.0	0
scf7180000024193	122244	0.4119	0	25.0293	Eukaryota	7746.0	0	Chordata	7746.0	0	Carnivora	6807.0	1	Felidae	5979.0	2	Felis	5979.0	2	Felis catus	5979.0	2
scf7180000022765	4959	0.4543	0	26.8509	Eukaryota	5267.0	0	Chordata	5267.0	0	Carnivora	5267.0	0	Felidae	5267.0	0	Felis	3693.0	1	Felis catus	3693.0	1
scf7180000020634	81664	0.3925	0	24.7258	Eukaryota	41968.0	0	Chordata	41968.0	0	Carnivora	41968.0	0	Felidae	41968.0	0	Felis	37805.0	1	Felis catus	37805.0	1
scf7180000018381	1495243	0.4176	0	51.9126	Eukaryota	46769.0	0	Chordata	46769.0	0	Carnivora	46769.0	0	Felidae	46769.0	0	Felis	46769.0	0	Felis catus	46769.0	0
scf7180000020304	57712	0.4035	0	42.9985	Eukaryota	31411.0	0	Chordata	31411.0	0	Carnivora	31411.0	0	Felidae	31411.0	0	Felis	28321.0	1	Felis catus	28321.0	1
scf7180000019150	150708	0.3588	0	132.4541	Eukaryota	46598.0	0	Chordata	46598.0	0	Carnivora	46598.0	0	Felidae	46598.0	0	Felis	46598.0	0	Felis catus	46598.0	0
scf7180000017823	896812	0.3747	0	49.6078	Eukaryota	55599.0	0	Chordata	55599.0	0	Carnivora	55599.0	0	Felidae	55599.0	0	Felis	55599.0	0	Felis catus	55599.0	0
scf7180000018642	627185	0.3757	0	50.4801	Eukaryota	25866.0	0	Chordata	25866.0	0	Carnivora	25866.0	0	Felidae	25866.0	0	Felis	23241.0	1	Felis catus	23241.0	1
scf7180000019760	50706	0.3967	0	51.3703	Eukaryota	45953.0	0	Chordata	45953.0	0	Carnivora	45953.0	0	Felidae	45953.0	0	Felis	45953.0	0	Felis catus	45953.0	0
scf7180000022143	15829	0.4103	0	49.7136	Eukaryota	2880.0	0	Chordata	2880.0	0	Carnivora	2880.0	0	Felidae	2880.0	0	Felis	2318.0	1	Felis catus	2318.0	1
scf7180000023233	16133	0.4305	0	134.6254	Eukaryota	4232.0	0	Chordata	4232.0	0	Carnivora	3897.0	1	Felidae	2271.0	2	Felis	2271.0	2	Felis catus	2271.0	2
scf7180000018886	460565	0.3886	0	49.4081	Eukaryota	43449.0	0	Chordata	43449.0	0	Carnivora	43449.0	0	Felidae	43449.0	0	Felis	39164.0	1	Felis catus	39164.0	1
scf7180000022496	11360	0.3704	0	39.9351	Eukaryota	9012.0	0	Chordata	9012.0	0	Carnivora	9012.0	0	Felidae	9012.0	0	Felis	7109.0	1	Felis catus	7109.0	1
scf7180000018658	563904	0.3911	0	50.2784	Eukaryota	24845.0	0	Chordata	24845.0	0	Carnivora	24845.0	0	Otariidae	14954.0	1	Zalophus	9964.0	3	Zalophus californianus	9964.0	3
scf7180000021745	58131	0.3898	0	25.1559	Eukaryota	42086.0	0	Chordata	42086.0	0	Carnivora	42086.0	0	Felidae	25763.0	3	Lynx	10242.0	6	Lynx canadensis	10242.0	6
scf7180000018954	134124	0.5357	0	43.9861	Eukaryota	12921.0	0	Chordata	12921.0	0	Carnivora	8349.0	1	Felidae	8349.0	1	Felis	8349.0	1	Felis catus	8349.0	1
scf7180000024001	1441014	0.4477	0	51.4714	Eukaryota	56727.0	0	Chordata	56727.0	0	Carnivora	56727.0	0	Felidae	39856.0	1	Panthera	17132.0	5	Felis catus	11420.0	6
scf7180000022121	11302	0.4207	0	24.3512	Eukaryota	7106.0	0	Chordata	7106.0	0	Carnivora	4998.0	1	Felidae	4998.0	1	Felis	4998.0	1	Felis catus	4998.0	1
scf7180000023982	544153	0.3981	0	50.3749	Eukaryota	47483.0	0	Chordata	47483.0	0	Carnivora	47483.0	0	Mustelidae	20396.0	3	Mustela	20396.0	4	Mustela putorius	20396.0	4
scf7180000017648	1400214	0.4009	100	50.109	Eukaryota	51215.0	0	Chordata	51215.0	0	Carnivora	51215.0	0	Felidae	51215.0	0	Felis	19688.0	3	Felis catus	19688.0	3
scf7180000023431	20253	0.4709	0	210.4209	Eukaryota	11836.0	0	Chordata	11836.0	0	Carnivora	11836.0	0	Felidae	11836.0	0	Felis	11836.0	0	Felis catus	11836.0	0
scf7180000018149	1075338	0.3793	0	71.9442	Eukaryota	45989.0	0	Chordata	45989.0	0	Carnivora	45989.0	0	Felidae	45989.0	0	Felis	45989.0	0	Felis catus	45989.0	0
scf7180000024037	285833	0.4441	0	26.8371	Eukaryota	24422.0	0	Chordata	24422.0	0	Carnivora	24422.0	0	Felidae	14802.0	2	Acinonyx	7449.0	3	Acinonyx jubatus	7449.0	3
scf7180000021857	32142	0.3579	0	23.1581	Eukaryota	6852.0	0	Chordata	6852.0	0	Carnivora	4372.0	2	Felidae	4372.0	2	Felis	3836.0	3	Felis catus	3836.0	3
scf7180000020671	115688	0.3544	0	24.947	Eukaryota	42163.0	0	Chordata	42163.0	0	Carnivora	42163.0	0	Felidae	42163.0	0	Felis	38026.0	1	Felis catus	38026.0	1
scf7180000018391	946927	0.4205	0	50.6908	Eukaryota	82982.0	0	Chordata	82982.0	0	Carnivora	82982.0	0	Felidae	64537.0	2	Felis	24434.0	4	Felis catus	24434.0	4
scf7180000023105	41590	0.5152	0	169.9423	Eukaryota	15407.0	0	Chordata	15407.0	0	Carnivora	15407.0	0	Felidae	15407.0	0	Felis	15407.0	0	Felis catus	15407.0	0
scf7180000018156	922249	0.3624	0	48.033	Eukaryota	46499.0	0	Chordata	46499.0	0	Carnivora	46499.0	0	Felidae	46499.0	0	Felis	46499.0	0	Felis catus	46499.0	0
scf7180000018192	945861	0.3507	0	48.9927	Eukaryota	40040.0	0	Chordata	40040.0	0	Carnivora	40040.0	0	Felidae	40040.0	0	Panthera	40040.0	0	Panthera pardus	40040.0	0
scf7180000022515	14035	0.471	0	24.2031	Eukaryota	2789.0	0	Chordata	2789.0	0	Carnivora	2789.0	0	Felidae	2789.0	0	Felis	1962.0	2	Felis catus	1962.0	2
scf7180000021988	32571	0.354	0	24.5552	Eukaryota	18082.0	0	Chordata	18082.0	0	Carnivora	18082.0	0	Felidae	18082.0	0	Felis	14526.0	1	Felis catus	14526.0	1
scf7180000022278	23757	0.432	0	24.5757	Eukaryota	6926.0	0	Chordata	6926.0	0	Carnivora	6926.0	0	Felidae	6926.0	0	Felis	6926.0	0	Felis catus	6926.0	0
scf7180000018026	59481	0.481	0	124.6807	Eukaryota	15408.0	0	Chordata	15408.0	0	Carnivora	15408.0	0	Felidae	15408.0	0	Felis	13847.0	1	Felis catus	13847.0	1
scf7180000023351	50621	0.4168	0	424.1838	Eukaryota	6039.0	0	Chordata	6039.0	0	Carnivora	6039.0	0	Phocidae	2464.0	2	Leptonychotes	1848.0	4	Leptonychotes weddellii	1848.0	4
scf7180000018587	1771019	0.4869	0	52.7278	Eukaryota	51871.0	0	Chordata	51871.0	0	Carnivora	51871.0	0	Felidae	51871.0	0	Felis	39079.0	1	Felis catus	39079.0	1
scf7180000022431	6845	0.5005	0	3399.9679	no-hit	0.0	0	no-hit	0.0	0	no-hit	0.0	0	no-hit	0.0	0	no-hit	0.0	0	no-hit	0.0	0
scf7180000019663	348992	0.3535	0	49.4644	Eukaryota	48005.0	0	Chordata	48005.0	0	Carnivora	48005.0	0	Felidae	48005.0	0	Felis	48005.0	0	Felis catus	48005.0	0
scf7180000023702	78816	0.405	0	408.1839	Eukaryota	11808.0	0	Chordata	11808.0	0	Carnivora	11808.0	0	Felidae	11808.0	0	Felis	11808.0	0	Felis catus	11808.0	0
scf7180000018826	475956	0.3536	0	45.5567	Eukaryota	45449.0	0	Chordata	45449.0	0	Carnivora	45449.0	0	Felidae	45449.0	0	Felis	45449.0	0	Felis catus	45449.0	0
scf7180000021121	57758	0.4108	0	27.1502	Eukaryota	9330.0	0	Chordata	9330.0	0	Primates	9330.0	0	Cercopithecidae	9330.0	0	Macaca	9330.0	0	Macaca mulatta	9330.0	0
scf7180000024191	69311	0.604	0	43.8104	Eukaryota	15703.0	0	Chordata	15703.0	0	Carnivora	15703.0	0	Felidae	13913.0	1	Panthera	6256.0	3	Panthera pardus	6256.0	3
scf7180000018839	595646	0.3475	0	47.7742	Eukaryota	45598.0	0	Chordata	45598.0	0	Carnivora	45598.0	0	Felidae	45598.0	0	Felis	45598.0	0	Felis catus	45598.0	0
scf7180000018239	1038251	0.4918	0	50.7075	Eukaryota	46916.0	0	Chordata	46916.0	0	Carnivora	46916.0	0	Felidae	46916.0	0	Felis	46916.0	0	Felis catus	46916.0	0
scf7180000017859	173528	0.3952	0	25.3269	Eukaryota	44450.0	0	Chordata	44450.0	0	Carnivora	28081.0	2	Canidae	17825.0	6	Canis	9646.0	7	Canis lupus	9646.0	7
scf7180000022595	8678	0.3932	0	26.0246	Eukaryota	9976.0	0	Chordata	9490.0	1	Primates	4580.0	4	Hominidae	4580.0	4	Homo	3060.0	5	Homo sapiens	3060.0	5
scf7180000022614	15239	0.3949	0	22.8917	Eukaryota	30024.0	0	Chordata	30024.0	0	Carnivora	30024.0	0	Felidae	30024.0	0	Felis	27010.0	1	Felis catus	27010.0	1
scf7180000023829	481551	0.4494	0	52.0535	Eukaryota	41955.0	0	Chordata	41955.0	0	Carnivora	41955.0	0	Felidae	41955.0	0	Panthera	25237.0	2	Panthera pardus	21035.0	3
scf7180000018126	580801	0.3725	0	46.4022	Eukaryota	46553.0	0	Chordata	46553.0	0	Carnivora	46553.0	0	Felidae	46553.0	0	Felis	46553.0	0	Felis catus	46553.0	0
scf7180000021995	16848	0.3299	0	25.1199	Eukaryota	18332.0	0	Chordata	18332.0	0	Primates	10082.0	1	Hominidae	10082.0	1	Ceratotherium	8250.0	2	Ceratotherium simum	8250.0	2
scf7180000021993	24578	0.3841	0	24.7618	Eukaryota	16049.0	0	Chordata	16049.0	0	Carnivora	16049.0	0	Felidae	16049.0	0	Felis	14412.0	1	Felis catus	14412.0	1
scf7180000018488	1551580	0.402	0	50.9887	Eukaryota	44464.0	0	Chordata	44464.0	0	Carnivora	44464.0	0	Felidae	44464.0	0	Panthera	39897.0	1	Panthera pardus	39897.0	1
scf7180000021550	15866	0.4152	0	27.4078	Eukaryota	4668.0	0	Chordata	4668.0	0	Carnivora	3760.0	1	Felidae	2734.0	2	Acinonyx	1161.0	6	Acinonyx jubatus	1161.0	6
scf7180000021200	60352	0.4323	0	25.3251	Eukaryota	33762.0	0	Chordata	33762.0	0	Carnivora	33762.0	0	Felidae	33762.0	0	Felis	30428.0	1	Felis catus	30428.0	1
scf7180000018969	83684	0.3808	0	46.5469	Eukaryota	15617.0	0	Chordata	15617.0	0	Carnivora	15617.0	0	Felidae	15617.0	0	Felis	15617.0	0	Felis catus	15617.0	0
scf7180000022849	27081	0.4526	0	322.7306	Eukaryota	12325.0	0	Chordata	12325.0	0	Carnivora	12325.0	0	Felidae	12325.0	0	Felis	11109.0	1	Felis catus	11109.0	1
scf7180000022151	22654	0.3874	0	25.4719	Eukaryota	10385.0	0	Chordata	10385.0	0	Primates	7089.0	3	Hominidae	7089.0	4	Homo	4263.0	5	Homo sapiens	4263.0	5
scf7180000021102	79117	0.4239	0	24.4378	Eukaryota	45879.0	0	Chordata	45879.0	0	Carnivora	45879.0	0	Felidae	45879.0	0	Felis	45879.0	0	Felis catus	45879.0	0
scf7180000020909	106922	0.3929	0	25.5872	Eukaryota	43960.0	0	Chordata	43960.0	0	Carnivora	43960.0	0	Felidae	43960.0	0	Felis	43960.0	0	Felis catus	43960.0	0
scf7180000017831	2567473	0.4606	0	53.359	Eukaryota	51461.0	0	Chordata	51461.0	0	Carnivora	51461.0	0	Felidae	46199.0	1	Panthera	30761.0	4	Panthera pardus	25625.0	5
scf7180000018552	86300	0.4214	0	46.124	Eukaryota	41078.0	0	Chordata	41078.0	0	Carnivora	41078.0	0	Felidae	41078.0	0	Felis	37009.0	1	Felis catus	37009.0	1
scf7180000021145	89160	0.3868	0	24.6692	Eukaryota	42961.0	0	Chordata	42961.0	0	Carnivora	42961.0	0	Felidae	42961.0	0	Felis	42961.0	0	Felis catus	42961.0	0
scf7180000020538	79872	0.3891	0	24.5152	Eukaryota	16254.0	0	Chordata	16254.0	0	Carnivora	14220.0	1	Felidae	14220.0	1	Felis	12679.0	2	Felis catus	12679.0	2
scf7180000022710	10504	0.4048	0	23.5975	Eukaryota	5376.0	0	Chordata	5376.0	0	Primates	2972.0	3	Hominidae	2247.0	4	Homo	2247.0	5	Homo sapiens	2247.0	5
scf7180000023888	1046732	0.4032	0	50.1333	Eukaryota	39295.0	0	Chordata	39295.0	0	Carnivora	39295.0	0	Felidae	39295.0	0	Felis	35427.0	1	Felis catus	35427.0	1
scf7180000022944	58912	0.4929	0	370.5169	Eukaryota	7381.0	0	Chordata	7381.0	0	Carnivora	7381.0	0	Otariidae	5263.0	1	Eumetopias	2980.0	2	Eumetopias jubatus	2980.0	2
scf7180000020294	199178	0.3695	0	24.5878	Eukaryota	44050.0	0	Chordata	44050.0	0	Carnivora	44050.0	0	Felidae	44050.0	0	Felis	44050.0	0	Felis catus	44050.0	0
scf7180000017890	753233	0.3653	0	50.0071	Eukaryota	47845.0	0	Chordata	47845.0	0	Carnivora	47845.0	0	Felidae	47845.0	0	Felis	47845.0	0	Felis catus	47845.0	0
scf7180000021353	81750	0.3624	0	25.2704	Eukaryota	39842.0	0	Chordata	39842.0	0	Carnivora	39842.0	0	Felidae	39842.0	0	Felis	39842.0	0	Felis catus	39842.0	0
scf7180000021252	37693	0.6066	0	53.9966	Eukaryota	2712.0	0	Chordata	2712.0	0	Carnivora	2712.0	0	Felidae	2013.0	2	Felis	1504.0	3	Felis catus	1504.0	3
scf7180000018983	546463	0.3893	0	50.107	Eukaryota	57648.0	0	Chordata	57648.0	0	Carnivora	57648.0	0	Felidae	36733.0	1	Mustela	20915.0	5	Mustela putorius	20915.0	5
scf7180000020305	137697	0.4256	0	25.4917	Eukaryota	11268.0	0	Chordata	11268.0	0	Primates	7448.0	2	Hominidae	7448.0	2	Pan	5015.0	3	Pan troglodytes	5015.0	3
scf7180000024160	149097	0.3746	0	24.2871	Eukaryota	44995.0	0	Chordata	44995.0	0	Carnivora	44995.0	0	Felidae	44995.0	0	Felis	44995.0	0	Felis catus	44995.0	0
scf7180000019360	470177	0.3767	0	48.9231	Eukaryota	44582.0	0	Chordata	44582.0	0	Carnivora	44582.0	0	Felidae	44582.0	0	Felis	44582.0	0	Felis catus	44582.0	0
scf7180000021738	62646	0.4525	0	26.7919	Eukaryota	31790.0	0	Chordata	31790.0	0	Carnivora	31790.0	0	Felidae	31790.0	0	Felis	28578.0	1	Felis catus	28578.0	1
scf7180000020967	28043	0.4319	0	88.7594	Eukaryota	2370.0	0	Chordata	2370.0	0	Carnivora	2370.0	0	Felidae	2370.0	0	Felis	1698.0	2	Felis catus	1698.0	2
scf7180000018302	35925	0.4813	0	44.2911	Eukaryota	31777.0	0	Chordata	31777.0	0	Carnivora	31777.0	0	Felidae	31777.0	0	Felis	31777.0	0	Felis catus	31777.0	0
scf7180000019789	210996	0.4273	0	52.1162	Eukaryota	18187.0	0	Chordata	18187.0	0	Carnivora	18187.0	0	Felidae	14501.0	1	Felis	10893.0	3	Felis catus	10893.0	3
scf7180000023365	23863	0.6991	0	183.1	no-hit	0.0	0	no-hit	0.0	0	no-hit	0.0	0	no-hit	0.0	0	no-hit	0.0	0	no-hit	0.0	0
scf7180000017657	2262031	0.4428	100	51.7189	Eukaryota	47510.0	0	Chordata	47510.0	0	Carnivora	47510.0	0	Felidae	47510.0	0	Felis	42607.0	1	Felis catus	42607.0	1
scf7180000020233	25908	0.3866	0	326.7483	Eukaryota	3716.0	0	Chordata	3716.0	0	Primates	2547.0	2	Hominidae	2170.0	4	Homo	2170.0	5	Homo sapiens	2170.0	5
scf7180000020327	101666	0.4476	0	46.9087	Eukaryota	46949.0	0	Chordata	46949.0	0	Carnivora	46949.0	0	Felidae	37412.0	2	Lynx	18720.0	4	Lynx canadensis	18720.0	4
scf7180000018194	1215156	0.4137	0	51.2162	Eukaryota	45096.0	0	Chordata	45096.0	0	Carnivora	45096.0	0	Felidae	45096.0	0	Felis	39760.0	1	Felis catus	39760.0	1
scf7180000019714	185724	0.4112	0	50.2959	Eukaryota	40540.0	0	Chordata	40540.0	0	Carnivora	40540.0	0	Mustelidae	40540.0	0	Enhydra	40540.0	0	Enhydra lutris	40540.0	0
scf7180000020833	58696	0.5489	0	48.7712	Eukaryota	5396.0	0	Chordata	5396.0	0	Carnivora	5396.0	0	Felidae	3076.0	1	Suricata	2320.0	2	Suricata suricatta	2320.0	2
scf7180000017521	39518	0.3837	0	24.5067	Eukaryota	39947.0	0	Chordata	39947.0	0	Carnivora	39947.0	0	Felidae	39947.0	0	Felis	39947.0	0	Felis catus	39947.0	0
scf7180000024203	71762	0.3446	0	23.5247	Eukaryota	37753.0	0	Chordata	37753.0	0	Carnivora	37753.0	0	Felidae	23085.0	2	Panthera	19273.0	3	Panthera pardus	15374.0	5
scf7180000020852	94623	0.3783	0	26.8297	Eukaryota	47373.0	0	Chordata	47373.0	0	Carnivora	47373.0	0	Felidae	47373.0	0	Felis	47373.0	0	Felis catus	47373.0	0
scf7180000021507	50871	0.6181	0	44.0422	Eukaryota	4225.0	0	Chordata	4225.0	0	Crocodylia	843.0	7	unresolved	427.0	9	unresolved	427.0	9	unresolved	427.0	9
scf7180000019232	300397	0.4404	0	50.0515	Eukaryota	13270.0	0	Chordata	13270.0	0	Carnivora	13270.0	0	Felidae	13270.0	0	Felis	10601.0	1	Felis catus	10601.0	1
scf7180000021587	5239	0.6064	0	145.4796	no-hit	0.0	0	no-hit	0.0	0	no-hit	0.0	0	no-hit	0.0	0	no-hit	0.0	0	no-hit	0.0	0
scf7180000018804	15245	0.5863	0	36.2601	Eukaryota	11778.0	0	Chordata	11778.0	0	Carnivora	11778.0	0	Felidae	7380.0	2	Felis	7380.0	2	Felis catus	7380.0	2
scf7180000021013	57575	0.354	0	25.6245	Eukaryota	21273.0	0	Chordata	21273.0	0	Carnivora	21273.0	0	Felidae	21273.0	0	Felis	19132.0	1	Felis catus	19132.0	1
scf7180000020776	52636	0.4409	0	70.4273	Eukaryota	31274.0	0	Chordata	31274.0	0	Carnivora	31274.0	0	Felidae	31274.0	0	Felis	28171.0	1	Felis catus	28171.0	1
scf7180000024114	190551	0.604	0	51.4059	Eukaryota	10556.0	0	Chordata	10556.0	0	Carnivora	10556.0	0	Felidae	6493.0	1	Suricata	4063.0	5	Suricata suricatta	4063.0	6
scf7180000020621	93708	0.3888	0	48.7108	Eukaryota	51568.0	0	Chordata	51568.0	0	Primates	31783.0	1	Hominidae	27020.0	4	Pan	27020.0	4	Pan troglodytes	27020.0	4
scf7180000017498	2981175	0.4047	0	51.4459	Eukaryota	49930.0	0	Chordata	49930.0	0	Carnivora	49930.0	0	Felidae	49930.0	0	Felis	49930.0	0	Felis catus	49930.0	0
scf7180000020549	69841	0.5066	0	48.6925	Eukaryota	44693.0	0	Chordata	44693.0	0	Carnivora	44693.0	0	Felidae	44693.0	0	Felis	44693.0	0	Felis catus	44693.0	0
scf7180000017632	176535	0.3505	0	47.1497	Eukaryota	27804.0	0	Chordata	27804.0	0	Carnivora	27804.0	0	Felidae	27804.0	0	Felis	25061.0	1	Felis catus	25061.0	1
scf7180000017626	651192	0.3491	0	46.5929	Eukaryota	46411.0	0	Chordata	46411.0	0	Carnivora	46411.0	0	Felidae	46411.0	0	Felis	46411.0	0	Felis catus	46411.0	0
scf7180000022665	8232	0.6279	0	126.1238	Eukaryota	398.0	0	Chordata	398.0	0	Carnivora	398.0	0	Felidae	398.0	0	Panthera	398.0	0	Panthera pardus	398.0	0
scf7180000017951	151939	0.3923	0	44.3735	Eukaryota	41292.0	0	Chordata	41292.0	0	Carnivora	41292.0	0	Felidae	41292.0	0	Felis	41292.0	0	Felis catus	41292.0	0
scf7180000018711	446567	0.4917	0	51.3342	Eukaryota	46956.0	1	Chordata	46956.0	1	Carnivora	36074.0	2	Felidae	21137.0	5	Homo	10882.0	8	Homo sapiens	10882.0	8
scf7180000021494	38480	0.3541	0	23.2897	Eukaryota	19099.0	0	Chordata	19099.0	0	Carnivora	19099.0	0	Felidae	19099.0	0	Felis	19099.0	0	Felis catus	19099.0	0
scf7180000021096	70940	0.4461	0	26.0301	Eukaryota	7085.0	0	Chordata	7085.0	0	Carnivora	3963.0	1	Herpestidae	3394.0	2	Suricata	3394.0	3	Suricata suricatta	3394.0	3
scf7180000023793	3008591	0.455	0	52.4452	Eukaryota	47675.0	0	Chordata	47675.0	0	Carnivora	47675.0	0	Felidae	47675.0	0	Felis	47675.0	0	Felis catus	47675.0	0
scf7180000018787	575637	0.5442	0	51.3214	Eukaryota	42364.0	0	Chordata	42364.0	0	Carnivora	42364.0	0	Herpestidae	33432.0	1	Suricata	33432.0	1	Suricata suricatta	33432.0	1
scf7180000021912	32008	0.5615	0	54.2618	Eukaryota	3664.0	0	Chordata	3664.0	0	Carnivora	2665.0	1	Felidae	1074.0	5	Homo	999.0	6	Homo sapiens	999.0	6
scf7180000019283	341706	0.4815	0	53.3833	Eukaryota	14198.0	0	Chordata	14198.0	0	Carnivora	8714.0	1	Hominidae	5484.0	2	Homo	5484.0	2	Homo sapiens	5484.0	2
scf7180000023321	20516	0.421	0	618.1639	Eukaryota	13477.0	0	Chordata	13477.0	0	Carnivora	13477.0	0	Felidae	13477.0	0	Felis	12145.0	1	Felis catus	12145.0	1
scf7180000022127	21171	0.3412	0	24.2751	Eukaryota	8255.0	0	Chordata	8255.0	0	Carnivora	8255.0	0	Felidae	5748.0	2	Felis	5748.0	2	Felis catus	5748.0	2
scf7180000020623	93521	0.3677	0	48.8968	Eukaryota	20080.0	0	Chordata	20080.0	0	Carnivora	20080.0	0	Felidae	20080.0	0	Felis	20080.0	0	Felis catus	20080.0	0
scf7180000018500	19863	0.391	0	35.8667	Eukaryota	47654.0	0	Chordata	47654.0	0	Carnivora	47654.0	0	Felidae	47654.0	0	Felis	47654.0	0	Felis catus	47654.0	0
scf7180000019812	259796	0.3495	0	48.397	Eukaryota	43318.0	0	Chordata	43318.0	0	Carnivora	43318.0	0	Felidae	43318.0	0	Felis	39022.0	1	Felis catus	39022.0	1
scf7180000021682	48840	0.3706	0	49.4184	Eukaryota	5187.0	0	Chordata	5187.0	0	Carnivora	4043.0	1	Felidae	3097.0	2	Felis	3097.0	2	Felis catus	3097.0	2
scf7180000017600	2378078	0.3956	0	50.8981	Eukaryota	46494.0	0	Chordata	46494.0	0	Carnivora	46494.0	0	Felidae	46494.0	0	Felis	46494.0	0	Felis catus	46494.0	0
scf7180000018591	620299	0.5571	0	50.4128	Eukaryota	40835.0	0	Chordata	40835.0	0	Carnivora	40835.0	0	Felidae	40835.0	0	Panthera	20425.0	1	Panthera pardus	20425.0	1
scf7180000022198	5468	0.5216	0	118.4302	no-hit	0.0	0	no-hit	0.0	0	no-hit	0.0	0	no-hit	0.0	0	no-hit	0.0	0	no-hit	0.0	0
scf7180000020954	92322	0.3607	0	25.103	Eukaryota	35567.0	0	Chordata	35567.0	0	Carnivora	35567.0	0	Felidae	35567.0	0	Felis	35567.0	0	Felis catus	35567.0	0
scf7180000020477	216918	0.3944	0	25.4459	Eukaryota	126431.0	0	Chordata	126431.0	0	Carnivora	126431.0	0	Felidae	63921.0	2	Ursus	24774.0	8	Lynx canadensis	12839.0	9
scf7180000020520	132329	0.3746	0	24.7817	Eukaryota	38782.0	0	Chordata	38782.0	0	Carnivora	38782.0	0	Felidae	38782.0	0	Felis	34946.0	1	Felis catus	34946.0	1
scf7180000019406	27219	0.4273	0	26.1191	Eukaryota	13492.0	0	Chordata	13492.0	0	Primates	5749.0	3	Hominidae	5749.0	3	Mus	5452.0	4	Mus musculus	5452.0	4
scf7180000018631	655193	0.4654	0	50.7403	Eukaryota	59655.0	0	Chordata	59655.0	0	Carnivora	59655.0	0	Felidae	59655.0	0	Acinonyx	59655.0	0	Acinonyx jubatus	59655.0	0
scf7180000018254	914731	0.3846	0	49.6203	Eukaryota	36042.0	0	Chordata	36042.0	0	Carnivora	36042.0	0	Felidae	20906.0	1	Felis	20906.0	1	Felis catus	20906.0	1
scf7180000017997	1218459	0.3836	0	48.3641	Eukaryota	47022.0	0	Chordata	47022.0	0	Carnivora	47022.0	0	Felidae	47022.0	0	Felis	47022.0	0	Felis catus	47022.0	0
scf7180000019952	321633	0.4537	0	49.1692	Eukaryota	38792.0	0	Chordata	38792.0	0	Carnivora	38792.0	0	Felidae	38792.0	0	Felis	38792.0	0	Felis catus	38792.0	0
scf7180000023147	38597	0.5832	0	182.0753	Eukaryota	4020.0	0	Chordata	4020.0	0	Carnivora	4020.0	0	Felidae	2534.0	2	Felis	2242.0	3	Felis catus	2242.0	3
scf7180000021805	27896	0.6026	0	53.6853	Eukaryota	4069.0	0	Chordata	4069.0	0	Carnivora	4069.0	0	Felidae	3081.0	3	Panthera	1133.0	7	Panthera pardus	902.0	8
scf7180000017799	305539	0.4019	0	53.1184	Eukaryota	47846.0	0	Chordata	47846.0	0	Carnivora	47846.0	0	Felidae	47846.0	0	Felis	47846.0	0	Felis catus	47846.0	0
scf7180000022428	21428	0.4246	0	25.1967	Eukaryota	7308.0	0	Chordata	7308.0	0	Carnivora	7308.0	0	Mustelidae	2007.0	4	Felis	1724.0	7	Felis catus	1724.0	7
scf7180000022763	9356	0.5147	0	51.822	Eukaryota	3152.0	0	Chordata	3152.0	0	Carnivora	3152.0	0	Felidae	2909.0	1	Felis	2633.0	2	Felis catus	2633.0	2
scf7180000021113	17995	0.4054	0	23.2231	Eukaryota	10377.0	0	Chordata	10377.0	0	Carnivora	10377.0	0	Felidae	10377.0	0	Felis	10377.0	0	Felis catus	10377.0	0
scf7180000021521	53535	0.4612	0	25.9748	Eukaryota	46217.0	0	Chordata	46217.0	0	Carnivora	46217.0	0	Felidae	40296.0	1	Acinonyx	31104.0	2	Acinonyx jubatus	31104.0	2
scf7180000021796	55783	0.6335	0	46.9811	Eukaryota	9287.0	0	Chordata	9287.0	0	Carnivora	9287.0	0	Felidae	4804.0	3	Acinonyx	4804.0	5	Acinonyx jubatus	4804.0	5
scf7180000019753	16470	0.6054	0	173.1729	Eukaryota	2388.0	0	Chordata	2388.0	0	Carnivora	1945.0	1	Felidae	1710.0	3	Felis	1094.0	5	Felis catus	1094.0	5
scf7180000020049	143669	0.6273	0	43.7891	Eukaryota	15378.0	0	Chordata	15378.0	0	Carnivora	13484.0	1	Felidae	13484.0	2	Panthera	4212.0	6	Panthera pardus	4212.0	6
scf7180000018683	558840	0.4258	0	49.4288	Eukaryota	48277.0	0	Chordata	48277.0	0	Carnivora	44217.0	1	Herpestidae	44217.0	1	Suricata	44217.0	1	Suricata suricatta	44217.0	1
scf7180000021884	31134	0.3644	0	25.5216	Eukaryota	7026.0	0	Chordata	7026.0	0	Carnivora	2526.0	2	Hominidae	2155.0	4	Homo	2155.0	4	Homo sapiens	2155.0	4
scf7180000018822	600165	0.354	0	48.374	Eukaryota	44156.0	0	Chordata	44156.0	0	Carnivora	44156.0	0	Felidae	44156.0	0	Felis	39792.0	1	Felis catus	39792.0	1
scf7180000021153	83096	0.6069	0	46.1809	Eukaryota	11948.0	0	Chordata	11948.0	0	Carnivora	11948.0	0	Felidae	5091.0	4	Mustela	2299.0	8	Mustela putorius	2299.0	8
scf7180000022632	16129	0.4223	0	25.0351	Eukaryota	5632.0	0	Chordata	5632.0	0	Carnivora	3531.0	1	Felidae	3531.0	1	Felis	3531.0	2	Felis catus	3531.0	2
scf7180000021004	100110	0.4678	0	28.1651	Eukaryota	44280.0	0	Chordata	44280.0	0	Carnivora	44280.0	0	Felidae	44280.0	0	Felis	35334.0	2	Felis catus	35334.0	2
scf7180000019552	331620	0.5104	0	52.8516	Eukaryota	26761.0	0	Chordata	26761.0	0	Carnivora	26761.0	0	Felidae	26761.0	0	Acinonyx	16146.0	2	Acinonyx jubatus	16146.0	2
scf7180000017472	3328613	0.3784	0	50.2979	Eukaryota	47266.0	0	Chordata	47266.0	0	Carnivora	47266.0	0	Felidae	47266.0	0	Felis	47266.0	0	Felis catus	47266.0	0
scf7180000019602	13043	0.3866	0	23.596	Eukaryota	11406.0	0	Chordata	11406.0	0	Carnivora	11406.0	0	Felidae	4948.0	2	Suricata	4138.0	4	Suricata suricatta	4138.0	4
scf7180000017830	1614564	0.3687	0	49.3908	Eukaryota	45877.0	0	Chordata	45877.0	0	Carnivora	45877.0	0	Felidae	45877.0	0	Felis	45877.0	0	Felis catus	45877.0	0
scf7180000020749	48964	0.4511	0	55.2451	Eukaryota	14550.0	0	Chordata	14550.0	0	Carnivora	14550.0	0	Felidae	14550.0	0	Felis	13111.0	1	Felis catus	13111.0	1
scf7180000019198	430938	0.3664	0	49.2455	Eukaryota	30172.0	0	Chordata	30172.0	0	Carnivora	30172.0	0	Canidae	21406.0	1	Canis	21406.0	1	Canis lupus	21406.0	1
scf7180000022647	11960	0.3855	0	23.6736	Eukaryota	11156.0	0	Chordata	11156.0	0	Carnivora	8636.0	1	Phocidae	4330.0	4	Neomonachus	2167.0	7	Neomonachus schauinslandi	2167.0	7
scf7180000020482	23350	0.3771	0	24.9776	Eukaryota	18475.0	0	Chordata	18475.0	0	Carnivora	18475.0	0	Felidae	18475.0	0	Felis	16611.0	1	Felis catus	16611.0	1
scf7180000018303	918646	0.4166	0	51.3548	Eukaryota	42650.0	0	Chordata	42650.0	0	Carnivora	42650.0	0	Felidae	42650.0	0	Felis	42650.0	0	Felis catus	42650.0	0
scf7180000023544	19281	0.4958	0	246.5987	Eukaryota	3699.0	0	Chordata	3699.0	0	Carnivora	3699.0	0	Felidae	3699.0	0	unresolved	1104.0	4	unresolved	1104.0	4
scf7180000017776	22419	0.6686	0	1419.1319	Eukaryota	636.0	0	Chordata	495.0	1	Carnivora	495.0	1	Felidae	356.0	2	Felis	356.0	2	Felis catus	356.0	2
scf7180000022782	3727	0.3944	0	24.6036	Eukaryota	1651.0	0	Chordata	1651.0	0	Carnivora	1651.0	0	Felidae	1325.0	1	Felis	1151.0	3	Felis catus	1151.0	3
scf7180000021437	76085	0.5025	0	49.2555	Eukaryota	12628.0	0	Chordata	12628.0	0	Primates	12628.0	0	Hominidae	7611.0	2	Homo	3845.0	5	Homo sapiens	3845.0	5
scf7180000018549	524754	0.3951	0	68.0297	Eukaryota	45054.0	0	Chordata	45054.0	0	Carnivora	45054.0	0	Felidae	45054.0	0	Felis	45054.0	0	Felis catus	45054.0	0
scf7180000023176	12425	0.5129	0	213.2061	Eukaryota	2854.0	0	Chordata	2854.0	0	Carnivora	2854.0	0	Felidae	2600.0	1	Felis	988.0	3	Felis catus	988.0	3
scf7180000023627	47818	0.4018	0	375.86	Eukaryota	12161.0	0	Chordata	12161.0	0	Carnivora	12161.0	0	Felidae	12161.0	0	Felis	12161.0	0	Felis catus	12161.0	0
scf7180000019287	434904	0.4307	0	52.3595	Eukaryota	40157.0	0	Chordata	40157.0	0	Carnivora	28281.0	1	Phocidae	14690.0	3	Leptonychotes	14690.0	4	Leptonychotes weddellii	14690.0	4
scf7180000017667	1856774	0.446	0	52.7789	Eukaryota	48120.0	0	Chordata	48120.0	0	Carnivora	43237.0	1	Mustelidae	14630.0	6	Mustela	14630.0	6	Mustela putorius	14630.0	6
scf7180000021178	68121	0.3918	0	25.6704	Eukaryota	70959.0	0	Chordata	70959.0	0	Perissodactyla	48834.0	2	Equidae	48834.0	2	Equus	48834.0	2	Equus caballus	48834.0	2
scf7180000022120	34418	0.4193	0	26.0527	Eukaryota	20777.0	0	Chordata	20777.0	0	Carnivora	20777.0	0	Felidae	20777.0	0	Felis	20777.0	0	Felis catus	20777.0	0
scf7180000021641	30300	0.4367	0	25.8402	Eukaryota	5616.0	0	Chordata	5616.0	0	Carnivora	3352.0	2	Felidae	3352.0	2	Felis	2770.0	4	Felis catus	2770.0	4
scf7180000021589	41879	0.3761	0	24.6439	Eukaryota	37303.0	0	Chordata	37303.0	0	Carnivora	37303.0	0	Felidae	37303.0	0	Felis	33609.0	1	Felis catus	33609.0	1
scf7180000022631	9535	0.5227	0	155.273	Eukaryota	2303.0	0	Chordata	2303.0	0	Carnivora	2303.0	0	Felidae	1822.0	2	Felis	986.0	4	Felis catus	986.0	4
scf7180000019407	309355	0.6212	0	48.8758	Eukaryota	14613.0	0	Chordata	14613.0	0	Carnivora	14613.0	0	Felidae	9548.0	4	Felis	3711.0	8	Felis catus	3711.0	8
scf7180000022729	23235	0.4007	0	27.94	Eukaryota	38886.0	0	Chordata	38886.0	0	Carnivora	38886.0	0	Felidae	38886.0	0	Felis	35054.0	1	Felis catus	35054.0	1
scf7180000020281	86046	0.5791	0	50.7601	Eukaryota	8160.0	0	Chordata	8160.0	0	Carnivora	8160.0	0	Felidae	8160.0	0	Felis	7363.0	1	Felis catus	7363.0	1
scf7180000024005	422974	0.4354	0	52.7444	Eukaryota	51928.0	0	Chordata	51928.0	0	Carnivora	51928.0	0	Felidae	51928.0	0	Lynx	31236.0	1	Lynx canadensis	31236.0	1
scf7180000020672	100237	0.4037	0	48.2232	Eukaryota	28559.0	0	Chordata	28559.0	0	Carnivora	28559.0	0	Felidae	28559.0	0	Felis	25663.0	1	Felis catus	25663.0	1
scf7180000024283	1846948	0.3955	100	52.0112	Eukaryota	35899.0	0	Chordata	35899.0	0	Carnivora	35899.0	0	Felidae	25156.0	1	Acinonyx	17960.0	2	Acinonyx jubatus	17960.0	2
scf7180000021707	35228	0.3809	0	46.274	Eukaryota	35559.0	0	Chordata	35559.0	0	Carnivora	35559.0	0	Felidae	35559.0	0	Felis	35559.0	0	Felis catus	35559.0	0
scf7180000019379	415179	0.4195	0	50.5976	Eukaryota	35858.0	0	Chordata	35858.0	0	Carnivora	35858.0	0	Felidae	35858.0	0	Felis	35858.0	0	Felis catus	35858.0	0
scf7180000023611	22210	0.4252	0	408.6044	Eukaryota	237156.0	0	Chordata	237156.0	0	Carnivora	237156.0	0	Hyaenidae	237156.0	0	Proteles	142792.0	2	Proteles cristata	142792.0	2
scf7180000021080	50634	0.4468	0	25.2292	Eukaryota	7858.0	0	Chordata	7858.0	0	Primates	3232.0	4	Hominidae	3232.0	5	Homo	3232.0	6	Homo sapiens	3232.0	6
scf7180000022599	23431	0.6695	0	49.7086	Eukaryota	326.0	0	Chordata	326.0	0	Carnivora	326.0	0	Felidae	326.0	0	Acinonyx	176.0	1	Acinonyx jubatus	176.0	1
scf7180000018773	446739	0.528	0	49.3392	Eukaryota	6722.0	1	Chordata	6722.0	1	Carnivora	5098.0	2	Felidae	5098.0	2	Felis	5098.0	2	Felis catus	5098.0	2
scf7180000024042	434726	0.4191	0	48.4663	Eukaryota	44743.0	0	Chordata	44743.0	0	Carnivora	44743.0	0	Felidae	44743.0	0	Felis	44743.0	0	Felis catus	44743.0	0
scf7180000017733	1675958	0.3714	0	50.8054	Eukaryota	45846.0	0	Chordata	45846.0	0	Carnivora	45846.0	0	Felidae	45846.0	0	Felis	45846.0	0	Felis catus	45846.0	0
scf7180000021842	21945	0.3677	0	24.417	Eukaryota	38117.0	0	Chordata	38117.0	0	Carnivora	38117.0	0	Felidae	38117.0	0	Felis	38117.0	0	Felis catus	38117.0	0
scf7180000021055	82563	0.5314	0	53.8023	Eukaryota	3098.0	0	Chordata	3098.0	0	Carnivora	2423.0	1	Bovidae	675.0	5	Odobenus	614.0	7	Odobenus rosmarus	614.0	7
scf7180000019745	185291	0.4396	0	52.1606	Eukaryota	28962.0	0	Chordata	28962.0	0	Carnivora	28962.0	0	Felidae	28962.0	0	Felis	26020.0	1	Felis catus	26020.0	1
scf7180000022808	9977	0.3637	0	22.1028	Eukaryota	25469.0	0	Chordata	25469.0	0	Carnivora	25469.0	0	Felidae	25469.0	0	Felis	22972.0	1	Felis catus	22972.0	1
scf7180000018606	329104	0.5101	0	49.9252	Eukaryota	19294.0	0	Chordata	19294.0	0	Carnivora	19294.0	0	Felidae	19294.0	0	Felis	17449.0	1	Felis catus	17449.0	1
scf7180000020493	183735	0.3743	0	24.5086	Eukaryota	42686.0	0	Chordata	42686.0	0	Carnivora	42686.0	0	Felidae	42686.0	0	Felis	42686.0	0	Felis catus	42686.0	0
scf7180000020714	107473	0.3992	0	24.6569	Eukaryota	45699.0	0	Chordata	45699.0	0	Carnivora	45699.0	0	Felidae	45699.0	0	Felis	45699.0	0	Felis catus	45699.0	0
scf7180000019218	67820	0.398	0	36.7305	Eukaryota	46057.0	0	Chordata	46057.0	0	Carnivora	46057.0	0	Felidae	46057.0	0	Felis	46057.0	0	Felis catus	46057.0	0
scf7180000018533	229163	0.445	0	50.6393	Eukaryota	20305.0	0	Chordata	20305.0	0	Carnivora	20305.0	0	Felidae	14235.0	2	Suricata	4396.0	5	Suricata suricatta	4396.0	6
scf7180000023488	97112	0.3875	0	369.1585	Eukaryota	23029.0	0	Chordata	23029.0	0	Carnivora	23029.0	0	Felidae	23029.0	0	Felis	20733.0	1	Felis catus	20733.0	1
scf7180000020695	121137	0.3814	0	49.0011	Eukaryota	7300.0	0	Chordata	7300.0	0	Carnivora	5156.0	2	Felidae	5156.0	2	Felis	3873.0	3	Felis catus	3873.0	3
scf7180000022684	17278	0.4004	0	25.8054	Eukaryota	18728.0	0	Chordata	18728.0	0	Carnivora	18728.0	0	Felidae	18728.0	0	Felis	16870.0	1	Felis catus	16870.0	1
scf7180000019872	156909	0.5142	0	47.338	Eukaryota	9430.0	0	Chordata	9430.0	0	Carnivora	9430.0	0	Felidae	9430.0	0	Felis	4720.0	1	Felis catus	4720.0	1
scf7180000020723	136584	0.5177	0	48.0103	Eukaryota	11610.0	0	Chordata	11610.0	0	Carnivora	11610.0	0	Felidae	11610.0	0	Felis	10389.0	1	Felis catus	10389.0	1
scf7180000019435	323293	0.4683	0	50.4398	Eukaryota	45467.0	0	Chordata	45467.0	0	Carnivora	45467.0	0	Felidae	45467.0	0	Felis	45467.0	0	Felis catus	45467.0	0
scf7180000022021	18834	0.4546	0	22.2214	Eukaryota	8045.0	0	Chordata	8045.0	0	Carnivora	8045.0	0	Felidae	8045.0	0	Felis	7164.0	1	Felis catus	7164.0	1
scf7180000022494	29232	0.4019	0	24.5829	Eukaryota	5281.0	0	Chordata	5281.0	0	Carnivora	5281.0	0	Felidae	5281.0	0	Felis	5281.0	0	Felis catus	5281.0	0
scf7180000024106	240719	0.6035	0	51.0779	Eukaryota	14767.0	0	Chordata	14767.0	0	Carnivora	13392.0	1	Felidae	10491.0	3	Lynx	7497.0	4	Lynx canadensis	7497.0	4
scf7180000020446	64063	0.384	0	25.3068	Eukaryota	38170.0	0	Chordata	38170.0	0	Carnivora	38170.0	0	Felidae	38170.0	0	Felis	38170.0	0	Felis catus	38170.0	0
scf7180000020928	14695	0.5219	0	56.5058	no-hit	0.0	0	no-hit	0.0	0	no-hit	0.0	0	no-hit	0.0	0	no-hit	0.0	0	no-hit	0.0	0
scf7180000020170	111067	0.3843	0	27.1214	Eukaryota	40048.0	0	Chordata	40048.0	0	Carnivora	40048.0	0	Felidae	40048.0	0	Felis	36048.0	1	Felis catus	36048.0	1
scf7180000022700	12173	0.481	0	24.337	Eukaryota	4548.0	0	Chordata	4548.0	0	Artiodactyla	2542.0	3	Hominidae	1284.0	6	Homo	1284.0	8	Homo sapiens	1284.0	8
scf7180000020899	97893	0.4189	0	25.9524	Eukaryota	26205.0	0	Chordata	26205.0	0	Carnivora	26205.0	0	Felidae	26205.0	0	Felis	20944.0	1	Felis catus	20944.0	1
scf7180000017965	524944	0.3538	0	49.6143	Eukaryota	47029.0	0	Chordata	47029.0	0	Carnivora	47029.0	0	Felidae	47029.0	0	Felis	47029.0	0	Felis catus	47029.0	0
scf7180000022168	18763	0.4046	0	27.6147	Eukaryota	10251.0	0	Chordata	10251.0	0	Primates	5887.0	2	Hominidae	5887.0	2	Homo	4400.0	4	Homo sapiens	4400.0	4
scf7180000023317	187843	0.4488	0	151.3221	Eukaryota	44848.0	0	Chordata	44848.0	0	Carnivora	44848.0	0	Felidae	42866.0	1	Acinonyx	17292.0	3	Acinonyx jubatus	17292.0	3
scf7180000021287	78249	0.4041	0	25.0141	Eukaryota	41301.0	0	Chordata	41301.0	0	Carnivora	41301.0	0	Felidae	41301.0	0	Felis	33769.0	1	Felis catus	33769.0	1
scf7180000024182	104149	0.3846	0	23.9562	Eukaryota	44172.0	0	Chordata	44172.0	0	Carnivora	44172.0	0	Felidae	44172.0	0	Felis	39810.0	1	Felis catus	39810.0	1
scf7180000021709	33070	0.4068	0	28.1886	Eukaryota	45919.0	0	Chordata	45919.0	0	Carnivora	45919.0	0	Felidae	45919.0	0	Felis	45919.0	0	Felis catus	45919.0	0
scf7180000023893	792137	0.3902	0	49.9752	Eukaryota	46430.0	0	Chordata	46430.0	0	Carnivora	46430.0	0	Felidae	46430.0	0	Felis	46430.0	0	Felis catus	46430.0	0
scf7180000018304	1247196	0.3877	0	51.2102	Eukaryota	47211.0	0	Chordata	47211.0	0	Carnivora	47211.0	0	Felidae	47211.0	0	Felis	32747.0	3	Felis catus	32747.0	3
scf7180000020894	69511	0.6368	0	43.9015	Eukaryota	4189.0	0	Chordata	4189.0	0	Carnivora	4189.0	0	Felidae	4189.0	0	Felis	3340.0	1	Felis catus	3340.0	1
scf7180000017493	1733809	0.3651	0	50.1903	Eukaryota	46541.0	0	Chordata	46541.0	0	Carnivora	46541.0	0	Felidae	46541.0	0	Felis	46541.0	0	Felis catus	46541.0	0
scf7180000020578	69355	0.4102	0	46.9319	Eukaryota	8956.0	0	Chordata	8956.0	0	Primates	4063.0	2	Hominidae	4063.0	4	Homo	4063.0	7	Homo sapiens	4063.0	7
scf7180000017515	21837	0.3509	0	25.1385	Eukaryota	7587.0	0	Chordata	7587.0	0	Apterygiformes	6053.0	2	Apterygidae	6053.0	2	Apteryx	6053.0	2	Apteryx mantelli	6053.0	2
scf7180000023929	1170892	0.4509	0	52.4307	Eukaryota	47275.0	0	Chordata	47275.0	0	Carnivora	47275.0	0	Felidae	38087.0	2	Panthera	9604.0	6	Panthera pardus	9604.0	6
scf7180000023464	51682	0.4197	0	294.1501	Eukaryota	9392.0	0	Chordata	9392.0	0	Carnivora	9392.0	0	Felidae	9392.0	0	Felis	7465.0	1	Felis catus	7465.0	1
scf7180000020323	2305895	0.4476	0	51.9079	Eukaryota	144860.0	0	Chordata	144860.0	0	Carnivora	144860.0	0	Felidae	144860.0	0	Lynx	144860.0	0	Lynx canadensis	144860.0	0
scf7180000019672	235906	0.3566	0	49.303	Eukaryota	45883.0	0	Chordata	45883.0	0	Carnivora	45883.0	0	Felidae	45883.0	0	Felis	45883.0	0	Felis catus	45883.0	0
scf7180000022702	4867	0.5194	0	70.5319	no-hit	0.0	0	no-hit	0.0	0	no-hit	0.0	0	no-hit	0.0	0	no-hit	0.0	0	no-hit	0.0	0
scf7180000020527	142398	0.4196	0	26.2613	Eukaryota	11209.0	0	Chordata	11209.0	0	Apterygiformes	7681.0	3	Apterygidae	7681.0	3	Apteryx	7681.0	3	Apteryx mantelli	7681.0	3
scf7180000019698	452480	0.4874	0	50.0582	Eukaryota	16731.0	0	Chordata	16731.0	0	Carnivora	16731.0	0	Felidae	13136.0	2	Felis	7116.0	4	Felis catus	7116.0	4
scf7180000018198	993662	0.5152	0	52.2708	Eukaryota	35390.0	0	Chordata	35390.0	0	Carnivora	32619.0	1	Felidae	32619.0	1	Lynx	14084.0	4	Lynx canadensis	14084.0	4
scf7180000018571	627307	0.4819	0	50.7861	Eukaryota	43135.0	0	Chordata	43135.0	0	Carnivora	43135.0	0	Felidae	43135.0	0	Panthera	17321.0	3	Panthera pardus	13005.0	4
scf7180000022784	12328	0.3625	0	24.3221	Eukaryota	21369.0	0	Chordata	21369.0	0	Carnivora	21369.0	0	Felidae	21369.0	0	Felis	19258.0	1	Felis catus	19258.0	1
scf7180000017666	1531446	0.4476	0	60.7663	Eukaryota	45516.0	0	Chordata	45516.0	0	Carnivora	45516.0	0	Felidae	22761.0	1	Suricata	22755.0	2	Suricata suricatta	22755.0	2
scf7180000023985	542211	0.4954	0	51.4708	Eukaryota	25745.0	0	Chordata	25745.0	0	Carnivora	25745.0	0	Felidae	6280.0	5	Panthera	6280.0	7	Suricata suricatta	6004.0	8
scf7180000020012	185772	0.4775	0	51.2888	Eukaryota	9547.0	0	Chordata	9547.0	0	Carnivora	9547.0	0	Felidae	4494.0	2	Acinonyx	2672.0	4	Acinonyx jubatus	2672.0	6
scf7180000023712	38314	0.5468	0	210.0761	Eukaryota	12577.0	0	Chordata	12577.0	0	Carnivora	12577.0	0	Felidae	12577.0	0	Felis	12577.0	0	Felis catus	12577.0	0
scf7180000022392	7392	0.63	0	58.5763	Eukaryota	3203.0	0	Chordata	3203.0	0	Carnivora	1681.0	2	Hominidae	588.0	8	Homo	588.0	8	Homo sapiens	588.0	8
scf7180000021950	32096	0.4505	0	27.3553	Eukaryota	6460.0	0	Chordata	6460.0	0	Primates	4909.0	3	Hominidae	4909.0	3	Pan	3371.0	4	Pan troglodytes	3371.0	4
scf7180000020244	166162	0.4418	0	24.2095	Eukaryota	21198.0	0	Chordata	21198.0	0	Carnivora	21198.0	0	Canidae	7407.0	4	Canis	5539.0	8	Canis lupus	5539.0	8
scf7180000022131	26308	0.4516	0	23.7591	Eukaryota	3602.0	0	Chordata	3602.0	0	Carnivora	2074.0	3	Felidae	1491.0	4	Felis	1491.0	4	Felis catus	1491.0	4
scf7180000021983	29019	0.3846	0	23.2495	Eukaryota	32972.0	0	Chordata	32972.0	0	Carnivora	32972.0	0	Felidae	32972.0	0	Felis	32972.0	0	Felis catus	32972.0	0
scf7180000020653	75985	0.4169	0	1019.437	Eukaryota	13555.0	0	Chordata	13555.0	0	Carnivora	13555.0	0	Felidae	13555.0	0	Felis	13555.0	0	Felis catus	13555.0	0
scf7180000018888	474220	0.5292	0	51.962	Eukaryota	19603.0	0	Chordata	19603.0	0	Carnivora	14421.0	1	Felidae	14421.0	1	Felis	12631.0	2	Felis catus	12631.0	2
scf7180000023889	226671	0.503	0	51.5279	Eukaryota	18774.0	1	Chordata	18774.0	1	Carnivora	11832.0	2	Hominidae	6942.0	3	Homo	6942.0	5	Homo sapiens	6942.0	5
scf7180000018413	1008811	0.3936	100	51.364	Eukaryota	48441.0	0	Chordata	48441.0	0	Carnivora	48441.0	0	Felidae	41809.0	1	Felis	41809.0	1	Felis catus	41809.0	1
scf7180000022294	22132	0.4303	0	27.2916	Eukaryota	29634.0	0	Chordata	29634.0	0	Carnivora	19594.0	2	Felidae	16960.0	5	Felis	9996.0	6	Felis catus	9996.0	6
scf7180000019544	277661	0.6162	0	49.6499	Eukaryota	13170.0	0	Chordata	13170.0	0	Carnivora	13170.0	0	Felidae	13170.0	0	Felis	9289.0	1	Felis catus	9289.0	1
scf7180000022034	22849	0.4557	0	27.1826	Eukaryota	4192.0	0	Chordata	4192.0	0	Primates	1416.0	6	Hominidae	1416.0	6	Homo	1416.0	6	Homo sapiens	1416.0	6
scf7180000022654	14048	0.3921	0	48.4494	Eukaryota	2739.0	1	Chordata	2739.0	1	Primates	1841.0	2	Hominidae	1841.0	3	Homo	1841.0	4	Homo sapiens	1841.0	4
scf7180000018707	492488	0.4767	0	53.3353	Eukaryota	52361.0	0	Chordata	52361.0	0	Carnivora	52361.0	0	Felidae	52361.0	0	Felis	26310.0	2	Felis catus	26310.0	2
scf7180000019976	228696	0.5667	0	48.1806	Eukaryota	13144.0	0	Chordata	13144.0	0	Carnivora	13144.0	0	Felidae	13144.0	0	Felis	13144.0	0	Felis catus	13144.0	0
scf7180000021915	21713	0.4261	0	198.6144	Eukaryota	12999.0	0	Chordata	12999.0	0	Carnivora	12999.0	0	Felidae	12999.0	0	Felis	11719.0	1	Felis catus	11719.0	1
scf7180000020509	119860	0.5258	0	52.0434	Eukaryota	26432.0	0	Chordata	26432.0	0	Carnivora	26432.0	0	Felidae	23076.0	1	Panthera	7669.0	5	Acinonyx jubatus	5128.0	6
scf7180000019271	386992	0.3846	0	50.7661	Eukaryota	77178.0	0	Chordata	77178.0	0	Carnivora	77178.0	0	Felidae	61594.0	1	Panthera	30822.0	2	Panthera pardus	30822.0	2
scf7180000020676	125666	0.391	0	50.8472	Eukaryota	46511.0	0	Chordata	46511.0	0	Carnivora	46511.0	0	Felidae	46511.0	0	Felis	46511.0	0	Felis catus	46511.0	0
scf7180000020728	94497	0.3676	0	23.3571	Eukaryota	45183.0	0	Chordata	45183.0	0	Carnivora	45183.0	0	Felidae	45183.0	0	Felis	45183.0	0	Felis catus	45183.0	0
scf7180000020235	133899	0.4407	0	48.1496	Eukaryota	12647.0	1	Chordata	12647.0	1	Carnivora	8019.0	2	Hominidae	4628.0	3	Suricata	3879.0	6	Suricata suricatta	3879.0	7
scf7180000018250	1212801	0.4133	0	52.851	Eukaryota	90957.0	0	Chordata	90957.0	0	Carnivora	90957.0	0	Felidae	81551.0	1	Felis	46370.0	3	Felis catus	46370.0	3
scf7180000023591	10399	0.7211	0	479.6195	Eukaryota	2544.0	0	Chordata	2544.0	0	Carnivora	2544.0	0	Felidae	2314.0	1	Panthera	1164.0	3	Panthera pardus	1164.0	3
scf7180000020205	129294	0.4428	0	49.8922	Eukaryota	18707.0	1	Chordata	18707.0	1	Primates	9116.0	3	Hominidae	7182.0	4	Homo	7182.0	5	Homo sapiens	7182.0	5
scf7180000020031	153270	0.5288	0	48.8091	Eukaryota	10360.0	0	Chordata	10360.0	0	Carnivora	5897.0	1	Felidae	5897.0	2	Felis	5897.0	3	Felis catus	5897.0	3
scf7180000020888	23481	0.3812	0	216.7353	Eukaryota	6451.0	0	Chordata	6451.0	0	Carnivora	6451.0	0	Felidae	6451.0	0	Felis	5804.0	1	Felis catus	5804.0	1
scf7180000017592	603623	0.3812	0	51.5491	Eukaryota	46635.0	0	Chordata	46635.0	0	Carnivora	46635.0	0	Felidae	46635.0	0	Felis	46635.0	0	Felis catus	46635.0	0
scf7180000017847	4851842	0.403	0	50.6371	Eukaryota	49611.0	0	Chordata	49611.0	0	Carnivora	49611.0	0	Felidae	49611.0	0	Felis	42593.0	1	Felis catus	42593.0	1
scf7180000020663	62207	0.4354	0	211.9961	Eukaryota	22544.0	0	Chordata	22544.0	0	Carnivora	22544.0	0	Felidae	22544.0	0	Felis	20322.0	1	Felis catus	20322.0	1
scf7180000017531	3501263	0.3985	0	50.68	Eukaryota	56308.0	0	Chordata	56308.0	0	Carnivora	56308.0	0	Felidae	28779.0	2	Panthera	17304.0	6	Panthera pardus	17304.0	6
scf7180000020775	22740	0.5207	0	180.0123	no-hit	0.0	0	no-hit	0.0	0	no-hit	0.0	0	no-hit	0.0	0	no-hit	0.0	0	no-hit	0.0	0
scf7180000023505	13686	0.4326	0	381.0383	Eukaryota	2294.0	0	Chordata	2294.0	0	Carnivora	2294.0	0	Felidae	2294.0	0	Felis	1622.0	2	Felis catus	1622.0	2
scf7180000021821	40069	0.4816	0	24.7998	Eukaryota	20964.0	0	Chordata	20964.0	0	Chiroptera	13150.0	2	Pteropodidae	13150.0	2	Pteropus	13150.0	3	Pteropus vampyrus	7089.0	4
scf7180000024233	116822	0.458	0	51.5049	Eukaryota	9183.0	0	Chordata	9183.0	0	Carnivora	9183.0	0	Felidae	9183.0	0	Felis	9183.0	0	Felis catus	9183.0	0
scf7180000019002	581696	0.4919	100	47.7963	Eukaryota	29004.0	0	Chordata	29004.0	0	Carnivora	29004.0	0	Felidae	20286.0	3	Felis	5844.0	7	Felis catus	5844.0	7
scf7180000020651	128176	0.4585	0	52.1106	Eukaryota	46673.0	0	Chordata	46673.0	0	Carnivora	46673.0	0	Felidae	46673.0	0	Felis	46673.0	0	Felis catus	46673.0	0
scf7180000021453	29867	0.5977	0	48.0833	Eukaryota	15090.0	0	Chordata	15090.0	0	Carnivora	15090.0	0	Felidae	10389.0	1	Felis	9186.0	2	Felis catus	9186.0	2
scf7180000023468	21640	0.6692	0	223.794	Eukaryota	2553.0	0	Chordata	2553.0	0	Rodentia	1040.0	3	Cercopithecidae	1000.0	4	Macaca	1000.0	4	Cavia porcellus	783.0	5
scf7180000018451	436218	0.3637	0	47.9374	Eukaryota	46567.0	0	Chordata	46567.0	0	Carnivora	46567.0	0	Felidae	46567.0	0	Felis	41924.0	1	Felis catus	41924.0	1
scf7180000022812	14474	0.7229	0	318.6821	Eukaryota	2451.0	0	Chordata	2451.0	0	Carnivora	2451.0	0	Felidae	1789.0	1	Panthera	1132.0	2	Panthera pardus	1132.0	2
scf7180000017684	2912771	0.4745	0	53.5633	Eukaryota	107198.0	0	Chordata	107198.0	0	Carnivora	107198.0	0	Felidae	96681.0	1	Panthera	42977.0	5	Panthera pardus	32205.0	6
scf7180000019419	286407	0.5144	0	51.37	Eukaryota	29106.0	0	Chordata	29106.0	0	Carnivora	29106.0	0	Felidae	25768.0	1	Acinonyx	20055.0	3	Acinonyx jubatus	20055.0	3
scf7180000022709	11412	0.4409	0	2162.8245	Eukaryota	6141.0	0	Chordata	6141.0	0	Artiodactyla	6141.0	0	Bovidae	6141.0	0	Ovis	6141.0	0	Ovis canadensis	6141.0	0
scf7180000021149	60045	0.4401	0	24.5086	Eukaryota	12234.0	0	Chordata	12234.0	0	Carnivora	12234.0	0	Felidae	8809.0	1	Felis	8809.0	1	Felis catus	8809.0	1
scf7180000022983	20974	0.5095	0	140.4046	Eukaryota	16434.0	0	Chordata	16434.0	0	Carnivora	16434.0	0	Felidae	16434.0	0	Felis	16434.0	0	Felis catus	16434.0	0
scf7180000022289	18320	0.3777	0	25.101	Eukaryota	22650.0	0	Chordata	22650.0	0	Carnivora	22650.0	0	Felidae	22650.0	0	Felis	20594.0	1	Felis catus	20594.0	1
scf7180000021994	22792	0.4108	0	25.7683	Eukaryota	45925.0	0	Chordata	45925.0	0	Carnivora	45925.0	0	Felidae	45925.0	0	Felis	45925.0	0	Felis catus	45925.0	0
scf7180000024044	235935	0.5116	0	49.4014	Eukaryota	30512.0	0	Chordata	30512.0	0	Carnivora	30512.0	0	Felidae	30512.0	0	Felis	27557.0	1	Felis catus	27557.0	1
scf7180000019963	186402	0.4913	0	25.6709	Eukaryota	37468.0	0	Chordata	37468.0	0	Carnivora	37468.0	0	Felidae	34853.0	1	Felis	15472.0	3	Felis catus	15472.0	3
scf7180000021317	18149	0.3974	0	396.6992	Eukaryota	6437.0	0	Chordata	6437.0	0	Carnivora	6437.0	0	Felidae	6437.0	0	Felis	6437.0	0	Felis catus	6437.0	0
scf7180000020204	62716	0.4	0	48.8337	Eukaryota	13339.0	0	Chordata	13339.0	0	Carnivora	13339.0	0	Felidae	13339.0	0	Felis	12009.0	1	Felis catus	12009.0	1
scf7180000024147	134698	0.4396	0	24.8695	Eukaryota	10355.0	0	Chordata	10355.0	0	Artiodactyla	4128.0	4	Canidae	3139.0	5	Canis	2102.0	7	Canis lupus	2102.0	7
scf7180000017537	2725435	0.4861	0	50.1083	Eukaryota	38476.0	0	Chordata	38476.0	0	Carnivora	38476.0	0	Canidae	30544.0	1	Canis	30544.0	2	Canis lupus	30544.0	2
scf7180000022742	13771	0.4101	0	312.2336	no-hit	0.0	0	no-hit	0.0	0	no-hit	0.0	0	no-hit	0.0	0	no-hit	0.0	0	no-hit	0.0	0
scf7180000021392	52665	0.5624	0	50.8012	Eukaryota	6943.0	0	Chordata	6943.0	0	Carnivora	3250.0	2	Hominidae	2629.0	4	Pan	2102.0	6	Canis lupus	2073.0	7
scf7180000023671	31093	0.6082	0	325.0505	Eukaryota	2987.0	0	Chordata	2987.0	0	Carnivora	2987.0	0	Felidae	2432.0	2	Panthera	1651.0	3	Panthera pardus	1324.0	4
scf7180000018440	961050	0.4248	100	52.1297	Eukaryota	73739.0	0	Chordata	73739.0	0	Carnivora	73739.0	0	Phocidae	29364.0	3	Callorhinus	22002.0	5	Callorhinus ursinus	22002.0	5
scf7180000019934	168184	0.4737	0	27.7762	Eukaryota	35655.0	0	Chordata	35655.0	0	Carnivora	35655.0	0	Felidae	32079.0	1	Acinonyx	28520.0	2	Acinonyx jubatus	28520.0	2
scf7180000022415	361617	0.475	0	47.2649	Eukaryota	41401.0	0	Chordata	41401.0	0	Carnivora	41401.0	0	Felidae	37281.0	1	Acinonyx	20744.0	2	Acinonyx jubatus	20744.0	2
scf7180000022866	24129	0.489	0	122.3639	Eukaryota	4345.0	0	Chordata	4345.0	0	Artiodactyla	2867.0	1	Bovidae	2867.0	2	Ovis	2867.0	2	Ovis canadensis	2144.0	3
scf7180000019907	184294	0.3709	0	25.7812	Eukaryota	46905.0	0	Chordata	46905.0	0	Carnivora	34712.0	1	Felidae	34712.0	1	Felis	34712.0	1	Felis catus	34712.0	1
scf7180000018605	345149	0.3503	0	45.8855	Eukaryota	45179.0	0	Chordata	45179.0	0	Carnivora	45179.0	0	Felidae	45179.0	0	Felis	45179.0	0	Felis catus	45179.0	0
scf7180000019345	392470	0.3848	0	51.6514	Eukaryota	31227.0	0	Chordata	31227.0	0	Carnivora	31227.0	0	Canidae	11756.0	3	Mustela	9354.0	4	Mustela putorius	9354.0	5
scf7180000017652	1275946	0.3542	0	48.1929	Eukaryota	26880.0	0	Chordata	26880.0	0	Carnivora	26880.0	0	Felidae	26880.0	0	Felis	24143.0	1	Felis catus	24143.0	1
scf7180000021029	73149	0.3613	0	26.0375	Eukaryota	32565.0	0	Chordata	32565.0	0	Carnivora	32565.0	0	Felidae	32565.0	0	Felis	32565.0	0	Felis catus	32565.0	0
scf7180000023392	37401	0.5228	0	187.2557	Eukaryota	4612.0	0	Chordata	4612.0	0	Carnivora	4612.0	0	Felidae	4612.0	0	Felis	4340.0	1	Felis catus	4340.0	1
scf7180000020697	102869	0.3707	0	23.5313	Eukaryota	42765.0	0	Chordata	42765.0	0	Carnivora	42765.0	0	Felidae	42765.0	0	Felis	38526.0	1	Felis catus	38526.0	1
scf7180000018043	320537	0.3755	0	47.5136	Eukaryota	47296.0	0	Chordata	47296.0	0	Carnivora	47296.0	0	Felidae	47296.0	0	Felis	47296.0	0	Felis catus	47296.0	0
scf7180000023407	29459	0.4262	0	436.4912	Eukaryota	256970.0	0	Chordata	256970.0	0	Carnivora	256970.0	0	Hyaenidae	256970.0	0	Proteles	155516.0	1	Proteles cristata	155516.0	1
scf7180000019566	264565	0.394	0	50.325	Eukaryota	26243.0	0	Chordata	26243.0	0	Carnivora	21975.0	1	Felidae	21975.0	1	Panthera	7476.0	4	Panthera pardus	7476.0	4
scf7180000024148	172681	0.4034	0	25.4203	Eukaryota	44036.0	0	Chordata	44036.0	0	Carnivora	44036.0	0	Felidae	31678.0	2	Panthera	10594.0	5	Panthera pardus	10594.0	6
scf7180000023974	484271	0.5219	0	53.072	Eukaryota	27143.0	0	Chordata	27143.0	0	Carnivora	27143.0	0	Felidae	27143.0	0	Felis	24441.0	1	Felis catus	24441.0	1
scf7180000024174	72119	0.383	0	24.2181	Eukaryota	32148.0	0	Chordata	32148.0	0	Carnivora	32148.0	0	Felidae	32148.0	0	Felis	32148.0	0	Felis catus	32148.0	0
scf7180000020881	79110	0.5051	0	49.0677	Eukaryota	4135.0	0	Chordata	4135.0	0	Carnivora	3741.0	1	Canidae	2557.0	2	Canis	2557.0	2	Canis lupus	2557.0	2
scf7180000023917	1381266	0.3902	0	51.9365	Eukaryota	48674.0	0	Chordata	48674.0	0	Carnivora	48674.0	0	Felidae	48674.0	0	Felis	39066.0	2	Felis catus	39066.0	2
scf7180000018567	1924453	0.4017	0	49.9099	Eukaryota	67267.0	0	Chordata	67267.0	0	Carnivora	67267.0	0	Ursidae	44185.0	1	Ursus	44185.0	1	Ursus arctos	44185.0	1
scf7180000019833	315101	0.3676	0	24.4865	Eukaryota	37077.0	0	Chordata	37077.0	0	Carnivora	37077.0	0	Felidae	37077.0	0	Felis	37077.0	0	Felis catus	37077.0	0
scf7180000018530	64863	0.4521	0	486.9128	Eukaryota	42605.0	0	Chordata	42605.0	0	Carnivora	42605.0	0	Felidae	42605.0	0	Felis	38376.0	1	Felis catus	38376.0	1
scf7180000024200	76937	0.6324	0	50.3941	Eukaryota	5419.0	0	Chordata	5419.0	0	Carnivora	4875.0	1	Felidae	3755.0	2	Acinonyx	3261.0	3	Acinonyx jubatus	3261.0	3
scf7180000022109	35495	0.3817	0	24.7183	Eukaryota	41807.0	0	Chordata	41807.0	0	Carnivora	41807.0	0	Felidae	41807.0	0	Felis	37683.0	1	Felis catus	37683.0	1
scf7180000019489	297099	0.3585	0	49.4126	Eukaryota	45929.0	0	Chordata	45929.0	0	Carnivora	45929.0	0	Felidae	45929.0	0	Felis	45929.0	0	Felis catus	45929.0	0
scf7180000021136	29425	0.5821	0	42.4593	Eukaryota	2850.0	0	Chordata	2850.0	0	Carnivora	2128.0	1	Felidae	1865.0	2	Felis	1865.0	2	Felis catus	1865.0	2
scf7180000021785	31190	0.6893	0	49.6264	Eukaryota	7995.0	1	Chordata	7995.0	1	Carnivora	4307.0	2	Hominidae	3688.0	3	Homo	3688.0	6	Homo sapiens	3688.0	6
scf7180000023748	12154	0.432	0	421.5333	no-hit	0.0	0	no-hit	0.0	0	no-hit	0.0	0	no-hit	0.0	0	no-hit	0.0	0	no-hit	0.0	0
scf7180000021190	14885	0.5234	0	69.951	no-hit	0.0	0	no-hit	0.0	0	no-hit	0.0	0	no-hit	0.0	0	no-hit	0.0	0	no-hit	0.0	0
scf7180000020735	79064	0.3863	0	25.6688	Eukaryota	23758.0	0	Chordata	23758.0	0	Primates	9923.0	3	Hominidae	9923.0	3	Rousettus	6692.0	4	Rousettus aegyptiacus	6692.0	4
scf7180000024039	909529	0.4498	0	52.0609	Eukaryota	46754.0	0	Chordata	46754.0	0	Carnivora	46754.0	0	Felidae	46754.0	0	Felis	46754.0	0	Felis catus	46754.0	0
scf7180000024033	311040	0.443	0	51.2842	Eukaryota	41089.0	0	Chordata	41089.0	0	Carnivora	41089.0	0	Felidae	28885.0	2	Suricata	8348.0	6	Suricata suricatta	8348.0	7
scf7180000019670	17308	0.423	0	26.6544	Eukaryota	13901.0	0	Chordata	13901.0	0	Carnivora	13901.0	0	Felidae	13901.0	0	Felis	11112.0	1	Felis catus	11112.0	1
scf7180000018343	773145	0.4077	0	50.7501	Eukaryota	46712.0	0	Chordata	46712.0	0	Carnivora	46712.0	0	Felidae	46712.0	0	Felis	46712.0	0	Felis catus	46712.0	0
scf7180000017741	2339019	0.4056	0	51.6882	Eukaryota	85825.0	0	Chordata	85825.0	0	Carnivora	85825.0	0	Felidae	59752.0	1	Acinonyx	51168.0	2	Acinonyx jubatus	51168.0	2
scf7180000023850	798385	0.4384	0	52.8414	Eukaryota	50800.0	0	Chordata	50800.0	0	Carnivora	50800.0	0	Felidae	50800.0	0	Felis	50800.0	0	Felis catus	50800.0	0
scf7180000022957	38131	0.4252	0	200.9783	Eukaryota	6705.0	0	Chordata	6705.0	0	Carnivora	6705.0	0	Felidae	6705.0	0	Felis	6705.0	0	Felis catus	6705.0	0
scf7180000018032	3344260	0.4347	0	52.2631	Eukaryota	60878.0	0	Chordata	60878.0	0	Carnivora	60878.0	0	Felidae	43317.0	2	Felis	24888.0	3	Felis catus	24888.0	3
scf7180000023189	35846	0.3911	0	167.768	Eukaryota	6814.0	0	Chordata	6814.0	0	Carnivora	6814.0	0	Felidae	6814.0	0	Felis	6110.0	1	Felis catus	6110.0	1
scf7180000022572	19079	0.6362	0	37.7687	Eukaryota	4114.0	0	Chordata	4114.0	0	Passeriformes	3120.0	1	Corvidae	3120.0	1	Aphelocoma	3120.0	1	Aphelocoma californica	1560.0	4
scf7180000018438	575981	0.471	0	51.237	Eukaryota	33624.0	0	Chordata	33624.0	0	Carnivora	33624.0	0	Felidae	33624.0	0	Felis	13586.0	2	Felis catus	13586.0	2
scf7180000022715	20717	0.3683	0	24.7175	Eukaryota	17662.0	0	Chordata	17662.0	0	Carnivora	17662.0	0	Felidae	17662.0	0	Felis	17662.0	0	Felis catus	17662.0	0
scf7180000021117	85441	0.3463	0	49.5655	Eukaryota	36382.0	0	Chordata	36382.0	0	Carnivora	36382.0	0	Felidae	36382.0	0	Felis	36382.0	0	Felis catus	36382.0	0
scf7180000024035	453454	0.3978	0	49.1461	Eukaryota	47721.0	0	Chordata	47721.0	0	Carnivora	47721.0	0	Felidae	47721.0	0	Felis	42901.0	1	Felis catus	42901.0	1
scf7180000022009	48827	0.3818	0	28.6821	Eukaryota	15023.0	0	Chordata	15023.0	0	Carnivora	15023.0	0	Felidae	15023.0	0	Felis	12056.0	1	Felis catus	12056.0	1
scf7180000022624	12094	0.4187	0	22.163	Eukaryota	2826.0	0	Chordata	2826.0	0	Carnivora	1172.0	2	Felidae	1172.0	2	Felis	1172.0	3	Felis catus	1172.0	3
scf7180000020465	99568	0.3943	0	24.9951	Eukaryota	5777.0	0	Chordata	5777.0	0	Primates	2254.0	2	Hominidae	2254.0	4	Sus	1576.0	5	Sus scrofa	1576.0	5
scf7180000017613	437271	0.419	0	53.0835	Eukaryota	44958.0	0	Chordata	44958.0	0	Carnivora	44958.0	0	Felidae	44958.0	0	Acinonyx	25208.0	1	Acinonyx jubatus	25208.0	1
scf7180000019923	698796	0.4827	0	50.2743	Eukaryota	41477.0	0	Chordata	41477.0	0	Carnivora	41477.0	0	Felidae	32973.0	1	Acinonyx	12417.0	4	Acinonyx jubatus	12417.0	5
scf7180000024166	121572	0.5106	0	52.6022	Eukaryota	38075.0	0	Chordata	38075.0	0	Carnivora	38075.0	0	Felidae	38075.0	0	Felis	19115.0	1	Felis catus	19115.0	1
scf7180000019970	25608	0.362	0	133.6502	Eukaryota	7309.0	0	Chordata	7309.0	0	Artiodactyla	7309.0	0	Bovidae	7309.0	0	Ovis	7309.0	0	Ovis canadensis	7309.0	0
scf7180000017903	1262683	0.436	0	53.8611	Eukaryota	47453.0	0	Chordata	47453.0	0	Carnivora	47453.0	0	Felidae	47453.0	0	Felis	47453.0	0	Felis catus	47453.0	0
scf7180000023857	1477263	0.385	0	50.7378	Eukaryota	65599.0	0	Chordata	65599.0	0	Carnivora	37315.0	1	Felidae	37315.0	1	Felis	31100.0	2	Felis catus	31100.0	2
scf7180000017956	207859	0.4555	0	50.1915	Eukaryota	33457.0	0	Chordata	33457.0	0	Carnivora	33457.0	0	Felidae	33457.0	0	Felis	30046.0	1	Felis catus	30046.0	1
scf7180000020841	72601	0.4086	0	49.5311	Eukaryota	44503.0	0	Chordata	44503.0	0	Carnivora	44503.0	0	Felidae	44503.0	0	Felis	44503.0	0	Felis catus	44503.0	0
scf7180000021126	39606	0.4518	0	24.4148	Eukaryota	8202.0	0	Chordata	8202.0	0	Primates	4577.0	3	Hominidae	3461.0	4	Pan	2306.0	6	Pan troglodytes	2306.0	6
scf7180000024050	434689	0.4329	0	52.2385	Eukaryota	83595.0	0	Chordata	83595.0	0	Carnivora	83595.0	0	Felidae	83595.0	0	Panthera	83595.0	0	Panthera pardus	83595.0	0
scf7180000022471	19748	0.4363	0	25.1407	Eukaryota	9759.0	0	Chordata	9759.0	0	Carnivora	9759.0	0	Felidae	9759.0	0	Felis	8772.0	1	Felis catus	8772.0	1
scf7180000023770	3071863	0.4424	0	51.761	Eukaryota	48499.0	0	Chordata	48499.0	0	Carnivora	48499.0	0	Felidae	48499.0	0	Felis	28108.0	3	Felis catus	28108.0	3
scf7180000019743	355319	0.397	0	50.4605	Eukaryota	47058.0	0	Chordata	47058.0	0	Carnivora	47058.0	0	Felidae	47058.0	0	Felis	47058.0	0	Felis catus	47058.0	0
scf7180000023657	34463	0.3956	0	304.9064	Eukaryota	6746.0	0	Chordata	6746.0	0	Carnivora	6746.0	0	Felidae	6746.0	0	Felis	6746.0	0	Felis catus	6746.0	0
scf7180000021931	18971	0.4277	0	76.8088	Eukaryota	2263.0	0	Chordata	2263.0	0	Carnivora	2263.0	0	Felidae	2263.0	0	Felis	1622.0	1	Felis catus	1622.0	1
scf7180000017810	1401507	0.4489	0	51.2512	Eukaryota	47441.0	0	Chordata	47441.0	0	Carnivora	47441.0	0	Felidae	47441.0	0	Felis	47441.0	0	Felis catus	47441.0	0
scf7180000022407	28427	0.37	0	23.4943	Eukaryota	3575.0	0	Chordata	3575.0	0	Carnivora	1780.0	2	Felidae	1515.0	3	Sus	1444.0	4	Sus scrofa	1444.0	4
scf7180000020298	28798	0.6981	0	141.2293	no-hit	0.0	0	no-hit	0.0	0	no-hit	0.0	0	no-hit	0.0	0	no-hit	0.0	0	no-hit	0.0	0
scf7180000017753	113522	0.3702	0	47.9256	Eukaryota	40596.0	0	Chordata	40596.0	0	Carnivora	40596.0	0	Felidae	40596.0	0	Felis	40596.0	0	Felis catus	40596.0	0
scf7180000022086	28505	0.6396	0	52.8553	Eukaryota	6991.0	0	Chordata	6991.0	0	Carnivora	6991.0	0	Felidae	4072.0	3	Acinonyx	1848.0	6	Acinonyx jubatus	1848.0	6
scf7180000018781	572718	0.3525	0	48.405	Eukaryota	32794.0	0	Chordata	32794.0	0	Carnivora	32794.0	0	Felidae	32794.0	0	Felis	29442.0	1	Felis catus	29442.0	1
scf7180000022017	35025	0.3758	0	24.5342	Eukaryota	35849.0	0	Chordata	35849.0	0	Carnivora	35849.0	0	Felidae	35849.0	0	Felis	35849.0	0	Felis catus	35849.0	0
scf7180000018697	646366	0.5991	0	57.1766	Eukaryota	21561.0	0	Chordata	21561.0	0	Carnivora	21561.0	0	Felidae	9624.0	3	Zalophus	5886.0	4	Zalophus californianus	5886.0	4
scf7180000022696	6424	0.398	0	23.3859	Eukaryota	13780.0	0	Chordata	13780.0	0	Carnivora	13780.0	0	Felidae	13780.0	0	Felis	12409.0	1	Felis catus	12409.0	1
scf7180000020124	223407	0.4283	0	25.9764	Eukaryota	22465.0	0	Chordata	22465.0	0	Carnivora	22465.0	0	Felidae	22465.0	0	Felis	20182.0	1	Felis catus	20182.0	1
scf7180000018346	262713	0.4232	0	51.3727	Eukaryota	62740.0	0	Chordata	62740.0	0	Carnivora	62740.0	0	Felidae	56381.0	1	Panthera	25068.0	4	Panthera pardus	18828.0	5
scf7180000019727	286601	0.3824	0	50.9254	Eukaryota	44655.0	0	Chordata	44655.0	0	Carnivora	44655.0	0	Felidae	44655.0	0	Felis	40204.0	1	Felis catus	40204.0	1
scf7180000019945	43089	0.5776	0	109.9576	Eukaryota	2738.0	0	Chordata	2738.0	0	Carnivora	2738.0	0	Felidae	2738.0	0	Felis	1640.0	1	Felis catus	1640.0	1
scf7180000023577	17194	0.4626	0	336.8504	no-hit	0.0	0	no-hit	0.0	0	no-hit	0.0	0	no-hit	0.0	0	no-hit	0.0	0	no-hit	0.0	0
scf7180000021861	45632	0.5723	0	47.9678	Eukaryota	4941.0	0	Chordata	4941.0	0	Carnivora	4941.0	0	Felidae	4941.0	0	Felis	4941.0	0	Felis catus	4941.0	0
scf7180000018832	49524	0.3656	0	48.9207	Eukaryota	45307.0	0	Chordata	45307.0	0	Carnivora	45307.0	0	Felidae	45307.0	0	Felis	45307.0	0	Felis catus	45307.0	0
scf7180000020480	173292	0.3894	0	50.7878	Eukaryota	43586.0	0	Chordata	43586.0	0	Carnivora	43586.0	0	Felidae	43586.0	0	Felis	43586.0	0	Felis catus	43586.0	0
scf7180000022623	34150	0.5888	0	45.7091	Eukaryota	20841.0	0	Chordata	20841.0	0	Carnivora	20841.0	0	Felidae	18425.0	1	Acinonyx	8216.0	3	Acinonyx jubatus	8216.0	3
scf7180000018218	1562134	0.5138	0	51.8869	Eukaryota	56960.0	0	Chordata	56960.0	0	Carnivora	56960.0	0	Felidae	35673.0	2	Ursus	15717.0	5	Ursus arctos	15717.0	6
scf7180000020077	78745	0.5051	0	46.6047	Eukaryota	7670.0	0	Chordata	7670.0	0	Carnivora	7670.0	0	Felidae	7670.0	0	Felis	5279.0	1	Felis catus	5279.0	1
scf7180000022722	12612	0.4319	0	26.3451	Eukaryota	2917.0	0	Chordata	2584.0	1	Carnivora	1818.0	3	Felidae	1563.0	4	Felis	1563.0	4	Felis catus	1563.0	4
scf7180000024161	132745	0.3776	0	29.0883	Eukaryota	48154.0	0	Chordata	48154.0	0	Carnivora	48154.0	0	Felidae	48154.0	0	Felis	48154.0	0	Felis catus	48154.0	0
scf7180000023455	30861	0.3369	0	279.7165	Eukaryota	3478.0	1	Chordata	3478.0	1	Carnivora	2434.0	2	Felidae	1740.0	4	Felis	1472.0	5	Felis catus	1472.0	5
scf7180000021778	26511	0.383	0	30.6909	Eukaryota	46105.0	0	Chordata	46105.0	0	Carnivora	46105.0	0	Felidae	46105.0	0	Felis	46105.0	0	Felis catus	46105.0	0
scf7180000022422	16298	0.4119	0	27.0382	Eukaryota	10152.0	0	Chordata	10152.0	0	Carnivora	10152.0	0	Felidae	10152.0	0	Felis	10152.0	0	Felis catus	10152.0	0
scf7180000019038	56046	0.4423	0	43.0755	Eukaryota	43498.0	0	Chordata	43498.0	0	Carnivora	43498.0	0	Felidae	43498.0	0	Felis	43498.0	0	Felis catus	43498.0	0
scf7180000019842	220664	0.5408	0	52.1001	Eukaryota	21608.0	0	Chordata	21608.0	0	Carnivora	21608.0	0	Mustelidae	6114.0	4	Mustela	4584.0	6	Mustela putorius	4584.0	6
scf7180000022286	17212	0.4287	0	26.3789	Eukaryota	23535.0	0	Chordata	23535.0	0	Carnivora	23535.0	0	Felidae	9803.0	4	Panthera	4917.0	8	Ailuropoda melanoleuca	2660.0	9
scf7180000022079	35896	0.4243	0	44.4269	Eukaryota	12112.0	0	Chordata	12112.0	0	Carnivora	12112.0	0	Felidae	5674.0	2	Suricata	5335.0	3	Suricata suricatta	5335.0	3
scf7180000023754	27342	0.5522	0	126.7538	Eukaryota	2172.0	0	Chordata	2172.0	0	Carnivora	2172.0	0	Felidae	1931.0	1	Felis	1931.0	1	Felis catus	1931.0	1
scf7180000019402	326830	0.4184	0	52.7739	Eukaryota	21708.0	0	Chordata	21708.0	0	Carnivora	21708.0	0	Felidae	21708.0	0	Panthera	13032.0	1	Panthera pardus	13032.0	1
scf7180000021005	121505	0.3597	0	24.2761	Eukaryota	39223.0	0	Chordata	39223.0	0	Carnivora	39223.0	0	Felidae	39223.0	0	Felis	35346.0	1	Felis catus	35346.0	1
scf7180000017461	1429517	0.3601	0	48.2722	Eukaryota	45804.0	0	Chordata	45804.0	0	Carnivora	45804.0	0	Felidae	45804.0	0	Felis	45804.0	0	Felis catus	45804.0	0
scf7180000021750	45798	0.4543	0	25.5803	Eukaryota	3903.0	0	Chordata	3903.0	0	Carnivora	1328.0	3	Felidae	1328.0	3	Homo	1264.0	6	Homo sapiens	1264.0	6
scf7180000021555	62053	0.581	0	45.6143	Eukaryota	4134.0	0	Chordata	4134.0	0	Carnivora	4134.0	0	Felidae	2926.0	1	Panthera	1770.0	3	Panthera pardus	1483.0	4
scf7180000019129	370911	0.4564	0	50.1779	Eukaryota	33120.0	0	Chordata	33120.0	0	Carnivora	33120.0	0	Herpestidae	33120.0	0	Suricata	33120.0	0	Suricata suricatta	33120.0	0
scf7180000017989	368598	0.3915	0	48.7262	Eukaryota	34033.0	0	Chordata	34033.0	0	Carnivora	34033.0	0	Felidae	34033.0	0	Felis	34033.0	0	Felis catus	34033.0	0
scf7180000017840	1681422	0.425	0	50.5328	Eukaryota	112164.0	0	Chordata	112164.0	0	Primates	72509.0	1	Hominidae	72509.0	2	Pan	42095.0	4	Pan troglodytes	42095.0	4
scf7180000020284	127992	0.4588	0	51.2545	Eukaryota	33633.0	0	Chordata	33633.0	0	Carnivora	33633.0	0	Felidae	33633.0	0	Felis	30192.0	1	Felis catus	30192.0	1
scf7180000019677	151240	0.472	0	46.7919	Eukaryota	28439.0	0	Chordata	28439.0	0	Carnivora	17252.0	1	Otariidae	8657.0	4	Zalophus	5781.0	6	Zalophus californianus	5781.0	7
scf7180000020451	100750	0.3939	0	24.4967	Eukaryota	41995.0	0	Chordata	41995.0	0	Carnivora	41995.0	0	Felidae	41995.0	0	Felis	41995.0	0	Felis catus	41995.0	0
scf7180000021065	1213065	0.3623	0	50.3618	Eukaryota	47960.0	0	Chordata	47960.0	0	Carnivora	47960.0	0	Felidae	47960.0	0	Felis	47960.0	0	Felis catus	47960.0	0
scf7180000018657	592603	0.3952	0	48.3743	Eukaryota	36758.0	0	Chordata	36758.0	0	Carnivora	36758.0	0	Herpestidae	14916.0	2	Suricata	14916.0	2	Suricata suricatta	14916.0	2
scf7180000019815	225303	0.4523	0	51.4074	Eukaryota	13940.0	1	Chordata	13940.0	1	Primates	9879.0	2	Hominidae	5143.0	4	Homo	5143.0	4	Homo sapiens	5143.0	4
scf7180000024029	332163	0.4181	0	54.1317	Eukaryota	43787.0	0	Chordata	43787.0	0	Carnivora	43787.0	0	Felidae	43787.0	0	Felis	39415.0	1	Felis catus	39415.0	1
scf7180000017787	1862097	0.5249	100	52.8463	Eukaryota	45124.0	0	Chordata	45124.0	0	Primates	23554.0	3	Cercopithecidae	12968.0	4	Pan	10586.0	8	Pan troglodytes	10586.0	8
scf7180000021681	33551	0.4351	0	25.9108	Eukaryota	4134.0	0	Chordata	4134.0	0	Primates	2356.0	3	Hominidae	2356.0	3	Pan	2017.0	5	Pan troglodytes	2017.0	5
scf7180000022792	16487	0.5025	0	26.1128	Eukaryota	3413.0	0	Chordata	3413.0	0	Carnivora	2265.0	2	Felidae	2265.0	2	Felis	1095.0	4	Felis catus	1095.0	4
scf7180000023872	771280	0.4419	0	50.9556	Eukaryota	40649.0	0	Chordata	40649.0	0	Carnivora	40649.0	0	Felidae	40649.0	0	Felis	36512.0	1	Felis catus	36512.0	1
scf7180000018849	544389	0.4437	0	51.6499	Eukaryota	42846.0	0	Chordata	42846.0	0	Carnivora	42846.0	0	Felidae	39158.0	1	Panthera	20751.0	5	Panthera tigris	11742.0	6
scf7180000017817	1464461	0.4351	0	51.2804	Eukaryota	120692.0	0	Chordata	120692.0	0	Carnivora	120692.0	0	Felidae	120692.0	0	Acinonyx	108666.0	1	Acinonyx jubatus	108666.0	1
scf7180000024094	575381	0.4383	0	48.7006	Eukaryota	33681.0	0	Chordata	33681.0	0	Carnivora	33681.0	0	Felidae	33681.0	0	Felis	16657.0	2	Felis catus	16657.0	2
scf7180000022492	9032	0.3499	0	25.032	Eukaryota	3835.0	0	Chordata	3835.0	0	Artiodactyla	2032.0	2	Hominidae	1063.0	6	Pan	708.0	8	Pan troglodytes	708.0	8
scf7180000018027	1283669	0.3644	0	49.1702	Eukaryota	57667.0	0	Chordata	57667.0	0	Carnivora	23729.0	2	Pteropodidae	22628.0	5	Rousettus	22628.0	5	Rousettus aegyptiacus	22628.0	5
scf7180000019869	205147	0.4453	0	51.6742	Eukaryota	24120.0	0	Chordata	24120.0	0	Carnivora	24120.0	0	Felidae	24120.0	0	Felis	14472.0	1	Felis catus	14472.0	1
scf7180000021911	52001	0.457	0	153.3382	Eukaryota	4921.0	0	Chordata	4921.0	0	Carnivora	4627.0	1	Felidae	3610.0	3	Felis	3138.0	5	Felis catus	3138.0	5
scf7180000020056	3177583	0.3912	0	50.9401	Eukaryota	50051.0	0	Chordata	50051.0	0	Carnivora	50051.0	0	Felidae	45340.0	1	Felis	38237.0	2	Felis catus	38237.0	2
scf7180000017759	1848458	0.38	0	50.3969	Eukaryota	48095.0	0	Chordata	48095.0	0	Carnivora	48095.0	0	Felidae	48095.0	0	Felis	48095.0	0	Felis catus	48095.0	0
scf7180000022465	54816	0.4372	0	54.4561	Eukaryota	15525.0	0	Chordata	15525.0	0	Carnivora	8655.0	2	Felidae	6503.0	3	Acinonyx	6503.0	5	Acinonyx jubatus	6503.0	5
scf7180000019712	116549	0.3903	0	25.7852	Eukaryota	44942.0	0	Chordata	44942.0	0	Carnivora	44942.0	0	Felidae	44942.0	0	Felis	44942.0	0	Felis catus	44942.0	0
scf7180000018620	2245126	0.5181	0	52.3835	Eukaryota	31450.0	0	Chordata	31450.0	0	Carnivora	31450.0	0	Felidae	31450.0	0	Acinonyx	10703.0	3	Acinonyx jubatus	10703.0	3
scf7180000023359	32224	0.3877	0	228.9142	Eukaryota	44081.0	0	Chordata	44081.0	0	Carnivora	44081.0	0	Felidae	44081.0	0	Felis	44081.0	0	Felis catus	44081.0	0
scf7180000022071	19245	0.4326	0	25.2384	Eukaryota	4359.0	0	Chordata	4359.0	0	Primates	2023.0	2	Hominidae	2023.0	2	Homo	1205.0	5	Homo sapiens	1205.0	5
scf7180000022938	43832	0.3832	0	337.1636	Eukaryota	7482.0	0	Chordata	7482.0	0	Carnivora	7482.0	0	Felidae	7482.0	0	Felis	7482.0	0	Felis catus	7482.0	0
scf7180000020838	42666	0.6109	0	44.9679	Eukaryota	25285.0	0	Chordata	25285.0	0	Carnivora	25285.0	0	Felidae	25285.0	0	Felis	22723.0	1	Felis catus	22723.0	1
scf7180000021339	74442	0.3875	0	49.154	Eukaryota	23668.0	0	Chordata	23668.0	0	Carnivora	23668.0	0	Felidae	19052.0	2	Panthera	9503.0	6	Panthera pardus	7124.0	7
scf7180000019440	336562	0.3685	0	50.7485	Eukaryota	44891.0	0	Chordata	44891.0	0	Carnivora	44891.0	0	Felidae	44891.0	0	Felis	44891.0	0	Felis catus	44891.0	0
scf7180000019631	262216	0.4229	0	25.6845	Eukaryota	44696.0	0	Chordata	44696.0	0	Carnivora	44696.0	0	Felidae	44696.0	0	Felis	40269.0	1	Felis catus	40269.0	1
scf7180000019141	11436	0.4122	0	27.6368	Eukaryota	33739.0	0	Chordata	33739.0	0	Carnivora	14973.0	3	Felidae	11493.0	6	Equus	6655.0	8	Panthera pardus	3904.0	9
scf7180000018761	13637	0.4153	0	37.16	Eukaryota	28217.0	0	Chordata	28217.0	0	Carnivora	28217.0	0	Felidae	14715.0	4	Lynx	2953.0	9	Lynx canadensis	2953.0	9
scf7180000022990	29348	0.5515	0	169.1149	Eukaryota	6580.0	0	Chordata	6580.0	0	Carnivora	6580.0	0	Felidae	6334.0	1	Felis	2578.0	3	Felis catus	2578.0	3
scf7180000022138	14296	0.4312	0	258.7589	Eukaryota	2340.0	0	Chordata	2340.0	0	Carnivora	2340.0	0	Felidae	2340.0	0	Felis	1890.0	1	Felis catus	1890.0	1
scf7180000021727	80613	0.4732	0	27.6916	Eukaryota	28617.0	0	Chordata	28617.0	0	Carnivora	26144.0	1	Felidae	10992.0	6	Canis	5658.0	8	Canis lupus	5658.0	8
scf7180000019528	274880	0.4342	0	50.9337	Eukaryota	15708.0	0	Chordata	15708.0	0	Carnivora	15708.0	0	Felidae	15708.0	0	Acinonyx	8556.0	2	Acinonyx jubatus	8556.0	2
scf7180000017807	156927	0.3904	0	47.8239	Eukaryota	22746.0	0	Chordata	22746.0	0	Carnivora	22746.0	0	Felidae	22746.0	0	Felis	20467.0	1	Felis catus	20467.0	1
scf7180000023580	29976	0.4757	0	482.6303	no-hit	0.0	0	no-hit	0.0	0	no-hit	0.0	0	no-hit	0.0	0	no-hit	0.0	0	no-hit	0.0	0
scf7180000018477	716763	0.4295	0	48.2425	Eukaryota	34922.0	0	Chordata	34922.0	0	Carnivora	34922.0	0	Felidae	34922.0	0	Panthera	28006.0	1	Panthera pardus	17590.0	2
scf7180000021882	32113	0.3817	0	24.1655	Eukaryota	38554.0	0	Chordata	38554.0	0	Carnivora	38554.0	0	Felidae	38554.0	0	Felis	34722.0	1	Felis catus	34722.0	1
scf7180000019635	330969	0.5041	0	52.9948	Eukaryota	21017.0	1	Chordata	21017.0	1	Carnivora	16826.0	3	Felidae	9931.0	5	Zalophus	4588.0	8	Zalophus californianus	4588.0	8
scf7180000019680	140681	0.387	0	48.8262	Eukaryota	15946.0	0	Chordata	15946.0	0	Carnivora	15946.0	0	Felidae	15946.0	0	Felis	14361.0	1	Felis catus	14361.0	1
scf7180000023458	203311	0.3885	0	539.48	Eukaryota	48198.0	0	Chordata	48198.0	0	Carnivora	48198.0	0	Felidae	48198.0	0	Felis	48198.0	0	Felis catus	48198.0	0
scf7180000018268	299400	0.3788	0	50.1339	Eukaryota	107278.0	0	Chordata	107278.0	0	Carnivora	107278.0	0	Felidae	107278.0	0	Panthera	98506.0	1	Panthera pardus	98506.0	1
scf7180000022489	14374	0.3732	0	23.5375	Eukaryota	20671.0	0	Chordata	20671.0	0	Carnivora	20671.0	0	Felidae	20671.0	0	Felis	18595.0	1	Felis catus	18595.0	1
scf7180000021675	40817	0.6124	0	48.4116	Eukaryota	9673.0	0	Chordata	9673.0	0	Carnivora	9673.0	0	Felidae	7300.0	2	Panthera	3084.0	5	Lynx canadensis	1751.0	6
scf7180000023768	2771805	0.4345	0	50.9152	Eukaryota	52860.0	0	Chordata	52860.0	0	Carnivora	52860.0	0	Felidae	29961.0	2	Panthera	19561.0	5	Panthera pardus	12726.0	6
scf7180000020526	30059	0.4388	0	353.531	Eukaryota	45969.0	0	Chordata	45969.0	0	Carnivora	45969.0	0	Felidae	45969.0	0	Felis	45969.0	0	Felis catus	45969.0	0
scf7180000021961	16604	0.4181	0	46.9237	Eukaryota	26106.0	1	Chordata	26106.0	1	Primates	20020.0	3	Hominidae	20020.0	3	Homo	11460.0	4	Homo sapiens	11460.0	4
scf7180000018003	1243113	0.4253	0	51.3948	Eukaryota	44851.0	0	Chordata	44851.0	0	Carnivora	44851.0	0	Felidae	38393.0	1	Felis	34136.0	2	Felis catus	34136.0	2
scf7180000021827	29047	0.5425	0	50.9744	Eukaryota	3514.0	1	Chordata	3514.0	1	Rodentia	1908.0	3	Muridae	1908.0	3	Mus	1908.0	4	Mus musculus	1908.0	4
scf7180000022161	26493	0.4874	0	768.098	Eukaryota	17850.0	0	Chordata	17850.0	0	Carnivora	17850.0	0	Felidae	14338.0	1	Acinonyx	3526.0	5	Acinonyx jubatus	3526.0	5
scf7180000019225	416028	0.3465	0	48.4869	Eukaryota	58753.0	0	Chordata	58753.0	0	Carnivora	58753.0	0	Felidae	30434.0	3	Panthera	12159.0	7	unresolved	6115.0	9
scf7180000020331	220781	0.5992	0	51.716	Eukaryota	21788.0	0	Chordata	21788.0	0	Carnivora	21788.0	0	Felidae	21788.0	0	Lynx	13212.0	2	Lynx canadensis	13212.0	2
scf7180000019882	172136	0.4422	0	51.6386	Eukaryota	23013.0	0	Chordata	23013.0	0	Carnivora	23013.0	0	Felidae	23013.0	0	Panthera	16086.0	1	Panthera pardus	16086.0	1
scf7180000019132	39966	0.4674	0	39.7323	Eukaryota	6382.0	0	Chordata	6382.0	0	Carnivora	4039.0	2	Felidae	3281.0	3	Homo	1630.0	5	Homo sapiens	1630.0	5
scf7180000020743	48376	0.3707	0	22.007	Eukaryota	45389.0	0	Chordata	45389.0	0	Carnivora	45389.0	0	Felidae	45389.0	0	Felis	45389.0	0	Felis catus	45389.0	0
scf7180000020596	94008	0.397	0	24.6805	Eukaryota	11025.0	0	Chordata	11025.0	0	Carnivora	9375.0	1	Felidae	8342.0	2	Panthera	4154.0	5	Panthera tigris	2088.0	6
scf7180000020273	75941	0.5656	0	48.5797	Eukaryota	9839.0	0	Chordata	9839.0	0	Carnivora	7957.0	1	Otariidae	2924.0	5	Zalophus	2924.0	7	Zalophus californianus	2924.0	7
scf7180000023766	3160036	0.3984	0	50.873	Eukaryota	49469.0	0	Chordata	49469.0	0	Carnivora	49469.0	0	Felidae	37535.0	1	Felis	37535.0	1	Felis catus	37535.0	1
scf7180000021415	45045	0.3969	0	47.8896	Eukaryota	16453.0	0	Chordata	16453.0	0	Carnivora	16453.0	0	Felidae	16453.0	0	Felis	13297.0	1	Felis catus	13297.0	1
scf7180000019228	513945	0.425	0	53.3799	Eukaryota	51837.0	0	Chordata	51837.0	0	Carnivora	51837.0	0	Ursidae	25941.0	2	Canis	20902.0	3	Canis lupus	20902.0	4
scf7180000020365	113171	0.3575	0	24.7692	Eukaryota	16874.0	0	Chordata	16874.0	0	Carnivora	8539.0	2	Felidae	8539.0	2	Felis	7032.0	4	Felis catus	7032.0	4
scf7180000023221	21798	0.5445	0	154.8362	Eukaryota	3340.0	0	Chordata	3340.0	0	Carnivora	3340.0	0	Felidae	3340.0	0	Acinonyx	1836.0	1	Acinonyx jubatus	1836.0	1
scf7180000018860	803017	0.3852	0	49.5361	Eukaryota	37742.0	0	Chordata	37742.0	0	Carnivora	37742.0	0	Felidae	30296.0	1	Acinonyx	11420.0	3	Acinonyx jubatus	11420.0	3
scf7180000020079	226342	0.6257	0	48.9862	Eukaryota	15033.0	0	Chordata	15033.0	0	Carnivora	8536.0	2	Otariidae	3497.0	5	Acinonyx	3474.0	7	Acinonyx jubatus	3474.0	7
scf7180000017599	49635	0.3941	0	27.1556	Eukaryota	24241.0	0	Chordata	24241.0	0	Carnivora	24241.0	0	Felidae	24241.0	0	Felis	21799.0	1	Felis catus	21799.0	1
scf7180000018325	1318877	0.5026	0	50.7826	Eukaryota	39804.0	0	Chordata	39804.0	0	Carnivora	39804.0	0	Felidae	39804.0	0	Felis	39804.0	0	Felis catus	39804.0	0
scf7180000022764	3177	0.5212	0	34.9005	no-hit	0.0	0	no-hit	0.0	0	no-hit	0.0	0	no-hit	0.0	0	no-hit	0.0	0	no-hit	0.0	0
scf7180000020644	136156	0.3666	0	49.1946	Eukaryota	18916.0	0	Chordata	18916.0	0	Carnivora	15806.0	1	Felidae	12283.0	3	Panthera	4131.0	6	Felis catus	4096.0	7
scf7180000024034	749567	0.3834	100	49.7452	Eukaryota	47042.0	0	Chordata	47042.0	0	Carnivora	47042.0	0	Felidae	47042.0	0	Felis	47042.0	0	Felis catus	47042.0	0
scf7180000019334	80413	0.4071	0	49.8392	Eukaryota	47527.0	0	Chordata	47527.0	0	Carnivora	47527.0	0	Felidae	47527.0	0	Felis	47527.0	0	Felis catus	47527.0	0
scf7180000019919	237786	0.463	0	51.4888	Eukaryota	49054.0	0	Chordata	49054.0	0	Carnivora	49054.0	0	Felidae	42627.0	1	Lynx	12500.0	4	Lynx canadensis	12500.0	5
scf7180000018277	862965	0.3587	0	48.8257	Eukaryota	45980.0	0	Chordata	45980.0	0	Carnivora	45980.0	0	Felidae	45980.0	0	Felis	45980.0	0	Felis catus	45980.0	0
scf7180000020210	168387	0.4353	0	50.3153	Eukaryota	32239.0	0	Chordata	32239.0	0	Carnivora	32239.0	0	Felidae	32239.0	0	Felis	28964.0	1	Felis catus	28964.0	1
scf7180000022271	13399	0.4267	0	23.9388	Eukaryota	4176.0	0	Chordata	4176.0	0	Carnivora	3549.0	1	Felidae	2390.0	2	Felis	2390.0	2	Felis catus	2390.0	2
scf7180000022223	18845	0.3863	0	24.1784	Eukaryota	23548.0	0	Chordata	23548.0	0	Carnivora	23548.0	0	Felidae	23548.0	0	Felis	21147.0	1	Felis catus	21147.0	1
scf7180000024273	1110040	0.4904	0	52.0061	Eukaryota	40667.0	0	Chordata	40667.0	0	Carnivora	27412.0	1	Otariidae	7226.0	6	Zalophus	7226.0	7	Zalophus californianus	7226.0	7
scf7180000022687	13609	0.5205	0	43.7926	Eukaryota	2400.0	0	Chordata	2400.0	0	Carnivora	2400.0	0	Felidae	2150.0	1	Felis	1457.0	3	Felis catus	1233.0	5
scf7180000023021	65535	0.3876	0	233.4106	Eukaryota	7010.0	0	Chordata	7010.0	0	Carnivora	7010.0	0	Felidae	7010.0	0	Felis	7010.0	0	Felis catus	7010.0	0
scf7180000020440	132711	0.4158	0	26.4867	Eukaryota	47246.0	0	Chordata	47246.0	0	Carnivora	47246.0	0	Felidae	39068.0	1	Felis	18548.0	4	Felis catus	18548.0	5
scf7180000017902	1434109	0.3495	0	48.4408	Eukaryota	47152.0	0	Chordata	47152.0	0	Carnivora	47152.0	0	Felidae	47152.0	0	Felis	47152.0	0	Felis catus	47152.0	0
scf7180000019572	392573	0.3745	0	48.3438	Eukaryota	44041.0	0	Chordata	44041.0	0	Carnivora	44041.0	0	Felidae	44041.0	0	Felis	39588.0	1	Felis catus	39588.0	1
scf7180000020686	90861	0.4239	0	50.9998	Eukaryota	28166.0	0	Chordata	28166.0	0	Carnivora	28166.0	0	Felidae	28166.0	0	Felis	25298.0	1	Felis catus	25298.0	1
scf7180000021295	49739	0.5071	0	50.9012	Eukaryota	42240.0	0	Chordata	42240.0	0	Carnivora	42240.0	0	Felidae	42240.0	0	Felis	38047.0	1	Felis catus	38047.0	1
scf7180000017919	1422044	0.3767	0	51.3582	Eukaryota	47922.0	0	Chordata	47922.0	0	Carnivora	47922.0	0	Felidae	47922.0	0	Felis	47922.0	0	Felis catus	47922.0	0
scf7180000020759	8506	0.5225	0	286.7051	no-hit	0.0	0	no-hit	0.0	0	no-hit	0.0	0	no-hit	0.0	0	no-hit	0.0	0	no-hit	0.0	0
scf7180000020640	28970	0.602	0	46.9749	Eukaryota	2743.0	0	Chordata	2743.0	0	Carnivora	2743.0	0	Felidae	2491.0	1	Felis	1279.0	4	Felis catus	1279.0	4
scf7180000018166	1060051	0.4832	0	51.8407	Eukaryota	55213.0	0	Chordata	55213.0	0	Carnivora	40379.0	1	Herpestidae	20748.0	4	Suricata	20748.0	7	Suricata suricatta	20748.0	7
scf7180000017851	1432925	0.407	0	51.3701	Eukaryota	47163.0	0	Chordata	47163.0	0	Carnivora	47163.0	0	Felidae	47163.0	0	Felis	47163.0	0	Felis catus	47163.0	0
scf7180000019786	285474	0.3906	0	51.2483	Eukaryota	44896.0	0	Chordata	44896.0	0	Carnivora	44896.0	0	Felidae	44896.0	0	Felis	39793.0	1	Felis catus	39793.0	1
scf7180000020746	76909	0.3878	0	25.4323	Eukaryota	47049.0	0	Chordata	47049.0	0	Carnivora	47049.0	0	Felidae	47049.0	0	Felis	42602.0	1	Felis catus	42602.0	1
scf7180000020505	99957	0.6038	0	48.1886	Eukaryota	3770.0	0	Chordata	3770.0	0	Carnivora	2179.0	1	Felidae	2179.0	1	Homo	1591.0	3	Homo sapiens	1591.0	4
scf7180000018076	1033474	0.4281	0	51.0781	Eukaryota	34357.0	0	Chordata	34357.0	0	Carnivora	34357.0	0	Felidae	34357.0	0	Felis	34357.0	0	Felis catus	34357.0	0
scf7180000024053	614177	0.4222	0	51.0268	Eukaryota	47934.0	0	Chordata	47934.0	0	Carnivora	43974.0	1	Felidae	33982.0	2	Lynx	19708.0	3	Lynx canadensis	19708.0	3
scf7180000020158	102907	0.3741	0	25.799	Eukaryota	66112.0	1	Chordata	66112.0	1	Carnivora	47694.0	2	Felidae	24241.0	3	Homo	18418.0	6	Homo sapiens	18418.0	6
scf7180000022311	24458	0.3539	0	24.0738	Eukaryota	4095.0	0	Chordata	4095.0	0	Carnivora	3502.0	1	Felidae	1935.0	3	Felis	1935.0	3	Felis catus	1935.0	3
scf7180000019005	1036290	0.3958	0	50.028	Eukaryota	47344.0	0	Chordata	47344.0	0	Carnivora	47344.0	0	Felidae	47344.0	0	Felis	47344.0	0	Felis catus	47344.0	0
scf7180000019409	195425	0.3985	0	49.2936	Eukaryota	25045.0	0	Chordata	25045.0	0	Carnivora	25045.0	0	Felidae	25045.0	0	Felis	22581.0	1	Felis catus	22581.0	1
scf7180000024196	64599	0.5873	0	49.2301	Eukaryota	9063.0	0	Chordata	9063.0	0	Carnivora	9063.0	0	Felidae	7623.0	2	Acinonyx	2600.0	5	Acinonyx jubatus	2600.0	6
scf7180000017949	387953	0.3707	0	47.1348	Eukaryota	45291.0	0	Chordata	45291.0	0	Carnivora	45291.0	0	Felidae	45291.0	0	Felis	45291.0	0	Felis catus	45291.0	0
scf7180000023490	50554	0.4329	0	216.3483	Eukaryota	28200.0	0	Chordata	28200.0	0	Carnivora	28200.0	0	Felidae	28200.0	0	Felis	28200.0	0	Felis catus	28200.0	0
scf7180000021694	70665	0.3971	0	40.2251	Eukaryota	31785.0	0	Chordata	31785.0	0	Carnivora	31785.0	0	Felidae	31785.0	0	Felis	31785.0	0	Felis catus	31785.0	0
scf7180000023864	374038	0.3996	0	50.435	Eukaryota	44562.0	0	Chordata	44562.0	0	Carnivora	44562.0	0	Felidae	44562.0	0	Felis	44562.0	0	Felis catus	44562.0	0
scf7180000021710	44240	0.4158	0	25.3931	Eukaryota	50922.0	0	Chordata	50922.0	0	Carnivora	31354.0	2	Canidae	10132.0	8	Canis	10132.0	8	Canis lupus	10132.0	8
scf7180000021781	66831	0.5203	0	45.338	Eukaryota	6813.0	0	Chordata	6813.0	0	Carnivora	6813.0	0	Felidae	6813.0	0	Felis	4068.0	1	Felis catus	4068.0	1
scf7180000020478	189280	0.5602	0	47.7545	Eukaryota	13921.0	0	Chordata	13921.0	0	Carnivora	10233.0	1	Felidae	7679.0	2	Felis	7679.0	2	Felis catus	7679.0	2
scf7180000022297	12019	0.5589	0	26.0697	Eukaryota	2960.0	0	Chordata	2960.0	0	Carnivora	2960.0	0	Felidae	2960.0	0	Felis	1751.0	1	Felis catus	1751.0	1
scf7180000022090	14531	0.4971	0	26.8685	Eukaryota	2920.0	0	Chordata	2920.0	0	Carnivora	2920.0	0	Felidae	2044.0	1	Suricata	876.0	4	Suricata suricatta	876.0	4
scf7180000018548	1467901	0.4253	0	94.4967	Eukaryota	61854.0	0	Chordata	61854.0	0	Carnivora	61854.0	0	Otariidae	29900.0	2	Callorhinus	29900.0	3	Callorhinus ursinus	29900.0	3
scf7180000021839	48317	0.382	0	23.86	Eukaryota	41308.0	0	Chordata	41308.0	0	Carnivora	41308.0	0	Felidae	41308.0	0	Felis	37221.0	1	Felis catus	37221.0	1
scf7180000022940	49635	0.3958	0	432.1964	Eukaryota	7061.0	0	Chordata	7061.0	0	Carnivora	7061.0	0	Felidae	4982.0	1	Felis	4982.0	1	Felis catus	4982.0	1
scf7180000018884	572555	0.4292	0	50.6653	Eukaryota	28585.0	0	Chordata	28585.0	0	Carnivora	28585.0	0	Felidae	28585.0	0	Felis	25713.0	1	Felis catus	25713.0	1
scf7180000017942	2016347	0.4109	0	50.8726	Eukaryota	47962.0	0	Chordata	47962.0	0	Carnivora	47962.0	0	Felidae	47962.0	0	Felis	47962.0	0	Felis catus	47962.0	0
scf7180000020280	178392	0.4116	0	51.2511	Eukaryota	43116.0	0	Chordata	43116.0	0	Carnivora	43116.0	0	Felidae	43116.0	0	Panthera	13058.0	3	Panthera pardus	13058.0	3
scf7180000019204	382455	0.3959	0	51.2496	Eukaryota	45672.0	0	Chordata	45672.0	0	Carnivora	45672.0	0	Felidae	45672.0	0	Felis	45672.0	0	Felis catus	45672.0	0
scf7180000022933	32739	0.3986	0	197.9396	Eukaryota	6949.0	0	Chordata	6949.0	0	Carnivora	6949.0	0	Felidae	6949.0	0	Felis	6273.0	1	Felis catus	6273.0	1
scf7180000018944	34632	0.5723	0	40.6921	Eukaryota	10792.0	0	Chordata	10792.0	0	Carnivora	10792.0	0	Felidae	10792.0	0	Felis	8627.0	1	Felis catus	8627.0	1
scf7180000020156	142812	0.4159	0	50.4051	Eukaryota	17396.0	0	Chordata	17396.0	0	Carnivora	17396.0	0	Felidae	17396.0	0	Panthera	7088.0	4	unresolved	3544.0	5
scf7180000022484	13740	0.4435	0	26.596	Eukaryota	8441.0	0	Chordata	8441.0	0	Primates	5187.0	3	Hominidae	5187.0	3	Homo	3436.0	4	Homo sapiens	3436.0	4
scf7180000024019	550367	0.3998	0	49.0842	Eukaryota	185705.0	0	Chordata	185705.0	0	Carnivora	185705.0	0	Felidae	145851.0	1	Acinonyx	91143.0	2	Acinonyx jubatus	91143.0	2
scf7180000020034	145228	0.3778	0	25.1505	Eukaryota	39817.0	0	Chordata	39817.0	0	Carnivora	39817.0	0	Felidae	39817.0	0	Felis	39817.0	0	Felis catus	39817.0	0
scf7180000018951	42001	0.4531	0	26.4138	Eukaryota	11197.0	0	Chordata	11197.0	0	Carnivora	11197.0	0	Felidae	11197.0	0	Felis	10325.0	1	Felis catus	10325.0	1
scf7180000020783	58656	0.3831	0	26.4519	Eukaryota	24181.0	0	Chordata	24181.0	0	Carnivora	24181.0	0	Felidae	24181.0	0	Felis	21752.0	1	Felis catus	21752.0	1
scf7180000022331	15254	0.4308	0	46.931	Eukaryota	2517.0	0	Chordata	2517.0	0	Carnivora	2517.0	0	Felidae	2267.0	1	Felis	1775.0	2	Felis catus	1775.0	2
scf7180000022698	13989	0.5384	0	47.203	Eukaryota	2130.0	1	Chordata	2130.0	1	Carnivora	982.0	3	Felidae	982.0	3	Felis	667.0	6	Felis catus	667.0	6
scf7180000022613	6998	0.393	0	25.7117	Eukaryota	8536.0	0	Chordata	8101.0	1	Primates	3620.0	4	Hominidae	3620.0	4	Sus	3332.0	5	Sus scrofa	3332.0	5
scf7180000021962	25335	0.3981	0	26.9868	Eukaryota	10189.0	0	Chordata	10189.0	0	Carnivora	10189.0	0	Felidae	10189.0	0	Felis	8172.0	1	Felis catus	8172.0	1
scf7180000020324	139855	0.5171	0	49.9976	Eukaryota	21146.0	0	Chordata	21146.0	0	Carnivora	21146.0	0	Felidae	9928.0	4	Ursus	4079.0	8	Felis catus	3317.0	9
scf7180000019638	312567	0.3841	0	24.1414	Eukaryota	24257.0	0	Chordata	24257.0	0	Carnivora	24257.0	0	Felidae	24257.0	0	Felis	24257.0	0	Felis catus	24257.0	0
scf7180000021364	50293	0.4119	0	25.9859	Eukaryota	23022.0	0	Chordata	23022.0	0	Carnivora	23022.0	0	Felidae	23022.0	0	Felis	20532.0	1	Felis catus	20532.0	1
scf7180000018946	456613	0.5014	0	49.5254	Eukaryota	19503.0	0	Chordata	19503.0	0	Carnivora	19503.0	0	Felidae	19503.0	0	Felis	7781.0	3	Felis catus	7781.0	4
scf7180000017680	1901712	0.4336	0	50.3429	Eukaryota	35706.0	0	Chordata	35706.0	0	Carnivora	35706.0	0	Felidae	35706.0	0	Felis	32114.0	1	Felis catus	32114.0	1
scf7180000018743	118055	0.5155	0	48.9439	Eukaryota	11767.0	0	Chordata	11767.0	0	Carnivora	11767.0	0	Felidae	10152.0	1	Felis	5894.0	3	Felis catus	5894.0	4
scf7180000021435	85539	0.5528	0	46.7282	Eukaryota	9596.0	0	Chordata	9596.0	0	Carnivora	9596.0	0	Felidae	9596.0	0	Felis	9596.0	0	Felis catus	9596.0	0
scf7180000018994	964839	0.3482	0	48.8764	Eukaryota	95300.0	0	Chordata	95300.0	0	Carnivora	95300.0	0	Felidae	77740.0	1	Panthera	45066.0	3	Panthera pardus	45066.0	3
scf7180000022656	15662	0.4947	0	51.8161	Eukaryota	2858.0	0	Chordata	2858.0	0	Carnivora	2858.0	0	Felidae	2858.0	0	Felis	2571.0	1	Felis catus	2571.0	1
scf7180000021053	67532	0.5415	0	25.4233	Eukaryota	21302.0	0	Chordata	21302.0	0	Carnivora	8717.0	2	Hominidae	7741.0	3	Pan	5164.0	5	Pan troglodytes	5164.0	5
scf7180000019793	112640	0.3791	0	45.9992	Eukaryota	27658.0	0	Chordata	27658.0	0	Carnivora	27658.0	0	Felidae	24908.0	1	Felis	24908.0	1	Felis catus	24908.0	1
scf7180000021253	54438	0.4063	0	24.6733	Eukaryota	8181.0	0	Chordata	8181.0	0	Carnivora	5202.0	1	Felidae	5202.0	1	Felis	4622.0	2	Felis catus	4622.0	2
scf7180000020910	104603	0.3573	0	24.697	Eukaryota	43209.0	0	Chordata	43209.0	0	Carnivora	43209.0	0	Felidae	43209.0	0	Felis	43209.0	0	Felis catus	43209.0	0
scf7180000019890	263984	0.458	0	24.8262	Eukaryota	43641.0	0	Chordata	43641.0	0	Carnivora	23886.0	2	Hominidae	12850.0	5	Homo	12850.0	7	Homo sapiens	12850.0	7
scf7180000017926	1452623	0.4492	0	52.7427	Eukaryota	117815.0	0	Chordata	117815.0	0	Carnivora	112618.0	1	Felidae	93932.0	2	Panthera	47893.0	6	Panthera pardus	40546.0	8
scf7180000019746	187306	0.5795	0	51.6774	Eukaryota	19952.0	0	Chordata	19952.0	0	Carnivora	19952.0	0	Felidae	18642.0	1	Lynx	6326.0	5	Lynx canadensis	6326.0	5
scf7180000020145	46716	0.5721	0	164.9213	Eukaryota	3808.0	0	Chordata	3808.0	0	Carnivora	2980.0	1	Felidae	1950.0	2	Acinonyx	1116.0	4	Acinonyx jubatus	1116.0	4
scf7180000019938	11048	0.5511	0	154.6297	Eukaryota	2989.0	0	Chordata	2989.0	0	Carnivora	2710.0	1	Felidae	2259.0	2	unresolved	849.0	5	unresolved	849.0	5
scf7180000018945	8373	0.4001	0	33.2243	Eukaryota	41557.0	0	Chordata	41557.0	0	Carnivora	41557.0	0	Felidae	41557.0	0	Felis	41557.0	0	Felis catus	41557.0	0
scf7180000019067	11600	0.3722	0	20.0131	Eukaryota	21209.0	0	Chordata	21209.0	0	Carnivora	21209.0	0	Felidae	21209.0	0	Felis	18815.0	1	Felis catus	18815.0	1
scf7180000017934	1079165	0.378	0	51.9157	Eukaryota	98836.0	0	Chordata	98836.0	0	Carnivora	98836.0	0	Felidae	98836.0	0	Neofelis	52337.0	1	Neofelis nebulosa	52337.0	1
scf7180000024124	145501	0.4899	0	50.0085	Eukaryota	20512.0	0	Chordata	20512.0	0	Carnivora	20512.0	0	Felidae	20512.0	0	Panthera	12356.0	1	Panthera pardus	10300.0	2
scf7180000021883	888435	0.4244	100	50.8955	Eukaryota	36336.0	0	Chordata	36336.0	0	Carnivora	36336.0	0	Felidae	36336.0	0	Felis	24307.0	4	Felis catus	24307.0	4
scf7180000021406	119680	0.372	0	23.877	Eukaryota	43241.0	0	Chordata	43241.0	0	Carnivora	43241.0	0	Felidae	43241.0	0	Felis	43241.0	0	Felis catus	43241.0	0
scf7180000019644	275885	0.586	0	51.3318	Eukaryota	8135.0	0	Chordata	8135.0	0	Carnivora	3908.0	3	Felidae	3908.0	3	Homo	2706.0	4	Homo sapiens	2706.0	4
scf7180000021557	41318	0.5885	0	53.9704	Eukaryota	2628.0	0	Chordata	2628.0	0	Carnivora	2628.0	0	Felidae	2628.0	0	Felis	1602.0	1	Felis catus	1602.0	1
scf7180000022130	15618	0.5409	0	46.3602	Eukaryota	2717.0	0	Chordata	2717.0	0	Carnivora	2329.0	1	Felidae	2070.0	2	Leopardus	1040.0	3	Felis catus	1030.0	6
scf7180000020535	5760	0.4962	0	22.988	Eukaryota	2589.0	0	Chordata	2589.0	0	Carnivora	2293.0	1	Felidae	2293.0	1	Felis	1531.0	3	Felis catus	1279.0	4
scf7180000022081	39632	0.3751	0	23.5682	Eukaryota	7454.0	0	Chordata	7454.0	0	Carnivora	5816.0	3	Felidae	4611.0	5	Felis	2436.0	6	Felis catus	2436.0	6
scf7180000018342	8106	0.5263	0	22.8078	Eukaryota	7988.0	0	Chordata	7988.0	0	Carnivora	7988.0	0	Felidae	7988.0	0	Acinonyx	4576.0	2	Acinonyx jubatus	4576.0	2
scf7180000020851	117179	0.3843	0	24.7689	Eukaryota	43773.0	0	Chordata	43773.0	0	Carnivora	43773.0	0	Felidae	43773.0	0	Felis	43773.0	0	Felis catus	43773.0	0
scf7180000021549	47994	0.4542	0	46.3213	Eukaryota	28764.0	0	Chordata	28764.0	0	Carnivora	28764.0	0	Felidae	28764.0	0	Felis	28764.0	0	Felis catus	28764.0	0
scf7180000018499	735401	0.3913	0	50.6255	Eukaryota	45846.0	0	Chordata	45846.0	0	Carnivora	45846.0	0	Felidae	45846.0	0	Felis	45846.0	0	Felis catus	45846.0	0
[truncated: 3,670 more rows]
