# Supplementary material for: High-quality carnivoran genomes from roadkill samples enable comparative species delineation in aardwolf and bat-eared fox
Source: eLife. 2021 Feb 18;10:e63167. doi: 10.7554/eLife.63167 (PMC7963486; doi:10.7554/eLife.63167)
Supplement: Supplementary file 11. [file elife-63167-supp11.xlsx]

## Sheet: Table S5 - Blobtools results Ot
Contigs name	length	GC	N	bam0	superkingdom.t.	superkingdom.s.	superkingdom.c.	phylum.t.	phylum.s.	phylum.c.	order.t.	order.s.	order.c.	family.t.	family.s.	family.c.	genus.t.	genus.s.	genus.c	species.t.	species.s.	species.c.
scf7180000052649	5588	0.5104	0	98.094	Eukaryota	7866.0	0	Chordata	7866.0	0	Carnivora	7866.0	0	Canidae	7866.0	0	Canis	6251.0	1	Canis lupus	5162.0	2
scf7180000045803	160177	0.5209	0	56.7306	Eukaryota	30832.0	0	Chordata	30832.0	0	Carnivora	20790.0	1	Canidae	15792.0	2	Canis	11588.0	4	Canis lupus	11588.0	4
scf7180000042293	774332	0.3674	0	59.0354	Eukaryota	41722.0	0	Chordata	41722.0	0	Carnivora	41722.0	0	Canidae	41722.0	0	Canis	41722.0	0	Canis lupus	41722.0	0
scf7180000051360	2695	0.4505	0	561.424	no-hit	0.0	0	no-hit	0.0	0	no-hit	0.0	0	no-hit	0.0	0	no-hit	0.0	0	no-hit	0.0	0
scf7180000044612	96519	0.3763	0	58.5429	Eukaryota	61940.0	0	Chordata	61940.0	0	Carnivora	61940.0	0	Canidae	61940.0	0	Canis	61940.0	0	Canis lupus	61940.0	0
scf7180000045736	172290	0.4424	0	58.5426	Eukaryota	40370.0	0	Chordata	40370.0	0	Carnivora	40370.0	0	Canidae	40370.0	0	Canis	40370.0	0	Canis lupus	40370.0	0
scf7180000041819	797790	0.4822	0	59.4729	Eukaryota	122794.0	0	Chordata	122794.0	0	Carnivora	122794.0	0	Canidae	122794.0	0	Canis	122794.0	0	Canis lupus	122794.0	0
scf7180000041440	152689	0.3624	0	56.9334	Eukaryota	19383.0	0	Chordata	19383.0	0	Carnivora	17430.0	1	Canidae	17430.0	1	Canis	17430.0	1	Canis lupus	17430.0	1
scf7180000054322	40679	0.445	0	616.2034	Eukaryota	73991.0	0	Chordata	52502.0	2	Gadiformes	47903.0	4	Gadidae	47903.0	4	Gadus	47903.0	4	Gadus morhua	47903.0	4
scf7180000051699	9099	0.4497	0	1611.4698	no-hit	0.0	0	no-hit	0.0	0	no-hit	0.0	0	no-hit	0.0	0	no-hit	0.0	0	no-hit	0.0	0
scf7180000051945	6388	0.44	0	570.561	Eukaryota	11985.0	0	Chordata	11399.0	1	Gadiformes	4864.0	6	Gadidae	4864.0	6	Gadus	4864.0	6	Gadus morhua	4864.0	6
scf7180000049347	25489	0.4345	0	136.6632	Eukaryota	12040.0	0	Chordata	10471.0	2	Synbranchiformes	3748.0	6	Mastacembelidae	3748.0	6	Mastacembelus	3748.0	7	Mastacembelus armatus	3748.0	7
scf7180000050473	19576	0.4432	0	273.3977	no-hit	0.0	0	no-hit	0.0	0	no-hit	0.0	0	no-hit	0.0	0	no-hit	0.0	0	no-hit	0.0	0
scf7180000043676	3615	0.4415	0	52.9794	Eukaryota	987.0	0	Chordata	987.0	0	Syngnathiformes	767.0	1	Syngnathidae	767.0	1	Syngnathus	767.0	1	Syngnathus acus	767.0	1
scf7180000051192	2842	0.4514	0	239.754	no-hit	0.0	0	no-hit	0.0	0	no-hit	0.0	0	no-hit	0.0	0	no-hit	0.0	0	no-hit	0.0	0
scf7180000048756	41459	0.4353	0	122.9914	Eukaryota	27711.0	0	Chordata	19372.0	2	Gadiformes	6787.0	6	Gadidae	6787.0	6	Gadus	6787.0	7	Gadus morhua	6787.0	8
scf7180000040866	105305	0.4231	0	59.2827	Eukaryota	33747.0	0	Chordata	33747.0	0	Carnivora	33747.0	0	Canidae	33747.0	0	Canis	33747.0	0	Canis lupus	33747.0	0
scf7180000052688	18477	0.4437	0	58.6501	Eukaryota	24213.0	0	Chordata	24213.0	0	Carnivora	20079.0	1	Felidae	12803.0	3	Zalophus	4888.0	5	Zalophus californianus	4888.0	5
scf7180000042822	612949	0.4106	0	59.1118	Eukaryota	17205.0	0	Chordata	17205.0	0	Carnivora	15428.0	1	Canidae	15428.0	1	Canis	15428.0	1	Canis lupus	15428.0	1
scf7180000049084	4718	0.4487	0	210.1655	Eukaryota	1202.0	0	Chordata	1202.0	0	Tetraodontiformes	952.0	1	Tetraodontidae	952.0	1	Takifugu	952.0	1	Takifugu rubripes	952.0	1
scf7180000045678	195035	0.5218	0	56.9615	Eukaryota	72011.0	0	Chordata	72011.0	0	Carnivora	72011.0	0	Canidae	72011.0	0	Canis	72011.0	0	Canis lupus	72011.0	0
scf7180000051070	22834	0.4473	0	41.9888	Eukaryota	9788.0	0	Chordata	8979.0	1	Carnivora	8979.0	1	Canidae	8979.0	1	Canis	4565.0	2	Canis lupus	4565.0	2
scf7180000041332	6475	0.348	0	35.0239	Eukaryota	3379.0	0	Chordata	3379.0	0	Carnivora	3379.0	0	Canidae	3379.0	0	Canis	3379.0	0	Canis lupus	3379.0	0
scf7180000050133	3154	0.455	0	700.0062	no-hit	0.0	0	no-hit	0.0	0	no-hit	0.0	0	no-hit	0.0	0	no-hit	0.0	0	no-hit	0.0	0
scf7180000051130	4853	0.434	0	81.4756	no-hit	0.0	0	no-hit	0.0	0	no-hit	0.0	0	no-hit	0.0	0	no-hit	0.0	0	no-hit	0.0	0
scf7180000043045	15567	0.4395	0	87.7674	Eukaryota	1041.0	0	Platyhelminthes	728.0	1	Polystomatidea	728.0	1	Polystomatidae	728.0	1	Protopolystoma	728.0	1	Protopolystoma xenopodis	728.0	1
scf7180000055007	69838	0.3807	0	64.3969	Eukaryota	74215.0	0	Chordata	74215.0	0	Carnivora	74215.0	0	Canidae	74215.0	0	Canis	74215.0	0	Canis lupus	74215.0	0
scf7180000046152	127840	0.4462	0	57.7918	Eukaryota	6016.0	0	Chordata	6016.0	0	Primates	3059.0	3	Hominidae	3059.0	3	Homo	2453.0	5	Homo sapiens	2453.0	5
scf7180000054944	32529	0.4025	0	833.2832	Eukaryota	89820.0	0	Chordata	89820.0	0	Carnivora	89820.0	0	Canidae	89820.0	0	Canis	89820.0	0	Canis lupus	89820.0	0
scf7180000043725	448867	0.377	0	59.5412	Eukaryota	53169.0	0	Chordata	53169.0	0	Carnivora	53169.0	0	Canidae	53169.0	0	Canis	53169.0	0	Canis lupus	53169.0	0
scf7180000047433	75873	0.4526	0	59.5233	Eukaryota	25724.0	0	Chordata	25724.0	0	Carnivora	25724.0	0	Canidae	15240.0	1	Canis	15240.0	1	Canis lupus	15240.0	1
scf7180000052509	3178	0.4487	0	297.8833	no-hit	0.0	0	no-hit	0.0	0	no-hit	0.0	0	no-hit	0.0	0	no-hit	0.0	0	no-hit	0.0	0
scf7180000048715	39033	0.4075	0	59.5795	Eukaryota	6184.0	0	Chordata	6184.0	0	Primates	2935.0	4	Hominidae	2319.0	5	Homo	2319.0	5	Homo sapiens	2319.0	5
scf7180000047876	1776	0.4291	0	67.5453	Eukaryota	335.0	0	Chordata	335.0	0	Kurtiformes	335.0	0	Apogonidae	335.0	0	Sphaeramia	335.0	0	Sphaeramia orbicularis	335.0	0
scf7180000040613	284341	0.4107	0	62.3239	Eukaryota	93570.0	0	Chordata	93570.0	0	Carnivora	93570.0	0	Canidae	93570.0	0	Canis	93570.0	0	Canis lupus	93570.0	0
scf7180000048314	5337	0.5183	0	203.0012	Eukaryota	15534.0	0	Chordata	15534.0	0	Carnivora	15534.0	0	Canidae	15534.0	0	Canis	15534.0	0	Canis lupus	15534.0	0
scf7180000049665	48087	0.4432	0	57.8857	Eukaryota	26802.0	0	Chordata	26802.0	0	Carnivora	26802.0	0	Otariidae	15318.0	1	Zalophus	15318.0	2	Zalophus californianus	15318.0	2
scf7180000051669	31489	0.5226	0	3150.6261	Eukaryota	34992.0	0	Chordata	34992.0	0	Carnivora	34992.0	0	Canidae	34992.0	0	Canis	34992.0	0	Canis lupus	34992.0	0
scf7180000048505	11527	0.4808	0	603.0479	Eukaryota	63060.0	0	Chordata	63060.0	0	Carnivora	63060.0	0	Canidae	63060.0	0	Canis	63060.0	0	Canis lupus	63060.0	0
scf7180000050656	5937	0.4418	0	97.8283	no-hit	0.0	0	no-hit	0.0	0	no-hit	0.0	0	no-hit	0.0	0	no-hit	0.0	0	no-hit	0.0	0
scf7180000043893	54907	0.4025	0	55.0606	Eukaryota	63003.0	0	Chordata	63003.0	0	Carnivora	63003.0	0	Canidae	63003.0	0	Canis	63003.0	0	Canis lupus	63003.0	0
scf7180000045356	169837	0.4651	0	59.4862	Eukaryota	59044.0	0	Chordata	59044.0	0	Carnivora	59044.0	0	Canidae	59044.0	0	Canis	59044.0	0	Canis lupus	59044.0	0
scf7180000050595	6212	0.4363	0	104.1794	Eukaryota	6428.0	0	Chordata	5260.0	1	Tetraodontiformes	4484.0	2	Tetraodontidae	4484.0	2	Takifugu	4484.0	2	Takifugu rubripes	4484.0	2
scf7180000044867	23710	0.369	0	48.5974	Eukaryota	4737.0	0	Chordata	4737.0	0	Carnivora	2485.0	2	Canidae	2485.0	2	Canis	2485.0	3	Canis lupus	2485.0	3
scf7180000051202	27484	0.4137	0	58.9903	Eukaryota	18197.0	0	Chordata	18197.0	0	Primates	10953.0	2	Hominidae	8312.0	4	Homo	8312.0	4	Homo sapiens	8312.0	4
scf7180000055962	14584	0.443	0	86.4301	Eukaryota	466.0	0	unresolved	233.0	1	unresolved	233.0	1	unresolved	233.0	1	unresolved	233.0	1	unresolved	233.0	1
scf7180000046759	2245	0.4463	0	142.5114	no-hit	0.0	0	no-hit	0.0	0	no-hit	0.0	0	no-hit	0.0	0	no-hit	0.0	0	no-hit	0.0	0
scf7180000049217	8261	0.4381	0	188.1155	Eukaryota	6805.0	0	Chordata	5649.0	1	Tetraodontiformes	3099.0	2	Tetraodontidae	3099.0	2	Takifugu	3099.0	3	Takifugu rubripes	3099.0	3
scf7180000047225	76643	0.3922	0	57.6233	Eukaryota	6673.0	0	Chordata	6673.0	0	Primates	4193.0	2	Hominidae	2480.0	4	Homo	2480.0	4	Homo sapiens	2480.0	4
scf7180000052425	2045	0.4357	0	28.3122	Eukaryota	4633.0	0	Chordata	4633.0	0	Tetraodontiformes	4633.0	0	Tetraodontidae	4633.0	0	Takifugu	4633.0	0	Takifugu rubripes	4633.0	0
scf7180000044120	118492	0.4378	0	55.1941	Eukaryota	11769.0	1	Chordata	11769.0	1	Carnivora	7317.0	2	Canidae	6548.0	3	Canis	5667.0	4	Canis lupus	5667.0	4
scf7180000050074	10926	0.4619	0	70.4846	Eukaryota	32038.0	0	Chordata	32038.0	0	Carnivora	32038.0	0	Canidae	32038.0	0	Canis	32038.0	0	Canis lupus	32038.0	0
scf7180000052458	4002	0.452	0	895.6779	Eukaryota	459.0	0	Platyhelminthes	459.0	0	Polystomatidea	459.0	0	Polystomatidae	459.0	0	Protopolystoma	459.0	0	Protopolystoma xenopodis	459.0	0
scf7180000056491	237047	0.3933	0	60.5622	Eukaryota	55674.0	0	Chordata	55674.0	0	Carnivora	36254.0	2	Canidae	36254.0	2	Canis	36254.0	3	Canis lupus	36254.0	3
scf7180000053728	2610	0.508	0	30.608	Eukaryota	6655.0	0	Chordata	6655.0	0	Carnivora	6655.0	0	Canidae	6655.0	0	Canis	4848.0	1	Canis lupus	3888.0	2
scf7180000045050	249934	0.3852	0	59.6837	Eukaryota	60550.0	0	Chordata	60550.0	0	Carnivora	60550.0	0	Canidae	60550.0	0	Canis	60550.0	0	Canis lupus	60550.0	0
scf7180000056175	2743569	0.3639	0	60.9344	Eukaryota	93840.0	0	Chordata	93840.0	0	Carnivora	93840.0	0	Canidae	93840.0	0	Canis	93840.0	0	Canis lupus	93840.0	0
scf7180000047711	95095	0.3379	0	60.0093	Eukaryota	13898.0	0	Chordata	13898.0	0	Carnivora	13898.0	0	Canidae	13898.0	0	Canis	13898.0	0	Canis lupus	13898.0	0
scf7180000042249	468380	0.3641	0	60.7688	Eukaryota	91361.0	0	Chordata	91361.0	0	Carnivora	91361.0	0	Canidae	91361.0	0	Canis	91361.0	0	Canis lupus	91361.0	0
scf7180000049514	44759	0.3578	0	60.309	Eukaryota	15587.0	0	Chordata	15587.0	0	Primates	9551.0	6	Hominidae	9551.0	6	Homo	9551.0	6	Homo sapiens	9551.0	6
scf7180000054670	43920	0.4458	0	152.5966	Eukaryota	96296.0	0	Chordata	96296.0	0	Carnivora	96296.0	0	Canidae	96296.0	0	Canis	96296.0	0	Canis lupus	96296.0	0
scf7180000045454	12845	0.4434	0	334.5052	Eukaryota	93882.0	0	Chordata	93882.0	0	Carnivora	93882.0	0	Canidae	93882.0	0	Canis	93882.0	0	Canis lupus	93882.0	0
scf7180000055738	7280	0.4438	0	656.4785	no-hit	0.0	0	no-hit	0.0	0	no-hit	0.0	0	no-hit	0.0	0	no-hit	0.0	0	no-hit	0.0	0
scf7180000054432	20343	0.4318	0	357.1074	Eukaryota	26193.0	0	Chordata	26193.0	0	Carnivora	26193.0	0	Canidae	26193.0	0	Canis	26193.0	0	Canis lupus	26193.0	0
scf7180000046933	80129	0.3894	0	60.2961	Eukaryota	8784.0	0	Chordata	8784.0	0	Carnivora	7496.0	1	Felidae	6674.0	2	Felis	5813.0	3	Felis catus	5813.0	3
scf7180000052257	7838	0.4468	0	671.0125	Eukaryota	5688.0	0	Chordata	2975.0	2	Tetraodontiformes	2064.0	4	Tetraodontidae	2064.0	4	Takifugu	2064.0	4	Takifugu rubripes	2064.0	4
scf7180000046038	178430	0.3956	0	60.7034	Eukaryota	80618.0	0	Chordata	80618.0	0	Carnivora	80618.0	0	Canidae	80618.0	0	Canis	80618.0	0	Canis lupus	80618.0	0
scf7180000055095	16491	0.4625	0	156.9813	Eukaryota	9390.0	0	Chordata	9390.0	0	Carnivora	9390.0	0	Canidae	9390.0	0	Canis	5675.0	1	Canis lupus	5675.0	1
scf7180000049139	7572	0.4414	0	57.3909	Eukaryota	9276.0	0	Chordata	9276.0	0	Carnivora	9276.0	0	Canidae	9276.0	0	Canis	9276.0	0	Canis lupus	9276.0	0
scf7180000042028	142110	0.4199	0	55.0118	Eukaryota	134983.0	0	Chordata	134983.0	0	Carnivora	134983.0	0	Canidae	134983.0	0	Canis	134983.0	0	Canis lupus	134983.0	0
scf7180000046526	92836	0.5216	0	55.7878	Eukaryota	14078.0	0	Chordata	14078.0	0	Carnivora	14078.0	0	Canidae	14078.0	0	Canis	9508.0	1	Canis lupus	9508.0	1
scf7180000051442	5540	0.4542	0	2116.4554	Eukaryota	4952.0	0	Chordata	4952.0	0	Kurtiformes	2286.0	2	Apogonidae	2286.0	2	Sphaeramia	2286.0	2	Sphaeramia orbicularis	2286.0	2
scf7180000046955	19256	0.4871	0	1238.6977	Eukaryota	80529.0	0	Chordata	80529.0	0	Carnivora	80529.0	0	Canidae	80529.0	0	Canis	80529.0	0	Canis lupus	80529.0	0
scf7180000051526	4987	0.4562	0	74.6164	no-hit	0.0	0	no-hit	0.0	0	no-hit	0.0	0	no-hit	0.0	0	no-hit	0.0	0	no-hit	0.0	0
scf7180000048688	4943	0.4457	0	251.716	Eukaryota	1057.0	0	Echinodermata	481.0	2	Forcipulatida	481.0	2	Asteriidae	481.0	2	Asterias	481.0	2	Asterias rubens	481.0	2
scf7180000041714	939748	0.4026	0	59.7081	Eukaryota	93454.0	0	Chordata	93454.0	0	Carnivora	93454.0	0	Canidae	93454.0	0	Canis	93454.0	0	Canis lupus	93454.0	0
scf7180000056369	573852	0.4574	0	59.1285	Eukaryota	33583.0	0	Chordata	33583.0	0	Carnivora	33583.0	0	Canidae	33583.0	0	Canis	23588.0	1	Canis lupus	23588.0	1
scf7180000045911	72720	0.3883	0	63.3226	Eukaryota	80615.0	0	Chordata	80615.0	0	Carnivora	80615.0	0	Canidae	80615.0	0	Canis	80615.0	0	Canis lupus	80615.0	0
scf7180000052199	9019	0.4468	0	842.9026	no-hit	0.0	0	no-hit	0.0	0	no-hit	0.0	0	no-hit	0.0	0	no-hit	0.0	0	no-hit	0.0	0
scf7180000056273	1569792	0.3665	0	60.1465	Eukaryota	117356.0	0	Chordata	117356.0	0	Carnivora	117356.0	0	Canidae	117356.0	0	Canis	103942.0	1	Canis lupus	103942.0	1
scf7180000048479	22802	0.4411	0	107.1137	no-hit	0.0	0	no-hit	0.0	0	no-hit	0.0	0	no-hit	0.0	0	no-hit	0.0	0	no-hit	0.0	0
scf7180000054052	11880	0.5105	0	244.0748	Eukaryota	43645.0	0	Chordata	43645.0	0	Carnivora	43645.0	0	Canidae	43645.0	0	Canis	43645.0	0	Canis lupus	43645.0	0
scf7180000051047	6711	0.4509	0	1240.5043	Eukaryota	2071.0	0	Platyhelminthes	826.0	2	Polystomatidea	826.0	2	Polystomatidae	826.0	2	Protopolystoma	826.0	2	Protopolystoma xenopodis	826.0	2
scf7180000047351	2703494	0.3834	0	59.969	Eukaryota	74059.0	0	Chordata	74059.0	0	Carnivora	74059.0	0	Canidae	74059.0	0	Canis	74059.0	0	Canis lupus	74059.0	0
scf7180000053423	6096	0.5033	0	72.2899	Eukaryota	8317.0	0	Chordata	8317.0	0	Carnivora	8317.0	0	Canidae	8317.0	0	Canis	6758.0	1	Canis lupus	5629.0	2
scf7180000050284	12714	0.4417	0	29.841	Eukaryota	501.0	0	Chordata	501.0	0	Columbiformes	501.0	0	Columbidae	501.0	0	Streptopelia	501.0	0	Streptopelia turtur	501.0	0
scf7180000053202	2416	0.4553	0	286.1752	no-hit	0.0	0	no-hit	0.0	0	no-hit	0.0	0	no-hit	0.0	0	no-hit	0.0	0	no-hit	0.0	0
scf7180000046360	131410	0.4199	0	59.2238	Eukaryota	13191.0	0	Chordata	13191.0	0	Carnivora	13191.0	0	Canidae	13191.0	0	Canis	13191.0	0	Canis lupus	13191.0	0
scf7180000041864	270569	0.4379	0	59.8041	Eukaryota	23376.0	0	Chordata	23376.0	0	Carnivora	23376.0	0	Canidae	23376.0	0	Canis	23376.0	0	Canis lupus	23376.0	0
scf7180000040937	791976	0.4198	0	59.7422	Eukaryota	61398.0	0	Chordata	61398.0	0	Carnivora	61398.0	0	Canidae	61398.0	0	Canis	51126.0	1	Canis lupus	51126.0	1
scf7180000044236	159435	0.3978	0	58.8863	Eukaryota	80862.0	0	Chordata	80862.0	0	Carnivora	80862.0	0	Canidae	80862.0	0	Canis	80862.0	0	Canis lupus	80862.0	0
scf7180000052434	4173	0.4443	0	94.0975	Eukaryota	1141.0	0	Chordata	760.0	1	Tetraodontiformes	760.0	1	Tetraodontidae	760.0	1	Takifugu	760.0	1	Takifugu rubripes	760.0	1
scf7180000042793	113932	0.4394	0	59.6655	Eukaryota	37134.0	0	Chordata	37134.0	0	Carnivora	37134.0	0	Canidae	37134.0	0	Canis	37134.0	0	Canis lupus	37134.0	0
scf7180000041021	624615	0.4355	0	59.4186	Eukaryota	69286.0	0	Chordata	69286.0	0	Carnivora	69286.0	0	Canidae	69286.0	0	Canis	57149.0	1	Canis lupus	57149.0	1
scf7180000045159	216851	0.4131	0	60.8783	Eukaryota	18732.0	0	Chordata	18732.0	0	Carnivora	18732.0	0	Canidae	18732.0	0	Canis	18732.0	0	Canis lupus	18732.0	0
scf7180000052048	22750	0.586	0	555.1565	Eukaryota	18591.0	0	Chordata	18591.0	0	Carnivora	16773.0	1	Felidae	7248.0	4	Acinonyx	5436.0	6	Acinonyx jubatus	5436.0	6
scf7180000042728	3541	0.4002	0	289.9436	Eukaryota	2892.0	0	Chordata	2892.0	0	Carnivora	2892.0	0	Canidae	2892.0	0	Canis	2892.0	0	Canis lupus	2892.0	0
scf7180000044253	3641	0.4444	0	254.6077	Eukaryota	6303.0	0	Chordata	6049.0	1	Kurtiformes	4698.0	2	Apogonidae	4698.0	2	Sphaeramia	4698.0	2	Sphaeramia orbicularis	4698.0	2
scf7180000043917	28759	0.4025	0	228.3547	Eukaryota	90181.0	0	Chordata	90181.0	0	Carnivora	90181.0	0	Canidae	90181.0	0	Canis	90181.0	0	Canis lupus	90181.0	0
scf7180000044489	98387	0.4229	0	57.8334	Eukaryota	11687.0	0	Chordata	11687.0	0	Primates	5076.0	2	Hominidae	5076.0	3	Homo	5076.0	5	Homo sapiens	5076.0	5
scf7180000046765	11453	0.4432	0	145.593	Eukaryota	7740.0	0	Chordata	7740.0	0	Tetraodontiformes	4056.0	3	Tetraodontidae	4056.0	3	Takifugu	4056.0	3	Takifugu rubripes	4056.0	3
scf7180000045137	261934	0.4424	0	58.3855	Eukaryota	40137.0	0	Chordata	40137.0	0	Carnivora	40137.0	0	Herpestidae	20478.0	2	Suricata	20478.0	3	Suricata suricatta	20478.0	3
scf7180000051389	10866	0.446	0	60.3727	Eukaryota	1330.0	0	Platyhelminthes	1015.0	1	Polystomatidea	1015.0	2	Polystomatidae	1015.0	2	Protopolystoma	1015.0	2	Protopolystoma xenopodis	1015.0	2
scf7180000045801	9807	0.4225	0	161.1537	Eukaryota	44855.0	0	Chordata	44855.0	0	Carnivora	44855.0	0	Canidae	44855.0	0	Canis	44855.0	0	Canis lupus	44855.0	0
scf7180000047119	85491	0.4167	0	56.2434	Eukaryota	6839.0	0	Chordata	6839.0	0	Primates	3521.0	2	Hominidae	2636.0	3	Homo	2636.0	4	Homo sapiens	2636.0	4
scf7180000049124	26385	0.4489	0	119.7881	Eukaryota	9172.0	0	Chordata	9172.0	0	Carnivora	8403.0	1	Canidae	8403.0	1	Canis	6351.0	2	Canis lupus	6351.0	2
scf7180000047379	83064	0.4045	0	62.127	Eukaryota	15040.0	0	Chordata	15040.0	0	Perissodactyla	5752.0	2	Equidae	5752.0	3	Equus	5752.0	3	Equus przewalskii	5752.0	3
scf7180000041691	1230393	0.3777	0	60.17	Eukaryota	86232.0	0	Chordata	86232.0	0	Carnivora	86232.0	0	Canidae	86232.0	0	Canis	86232.0	0	Canis lupus	86232.0	0
scf7180000049493	7252	0.4359	0	50.5401	Eukaryota	278.0	0	Platyhelminthes	278.0	0	Polystomatidea	278.0	0	Polystomatidae	278.0	0	Protopolystoma	278.0	0	Protopolystoma xenopodis	278.0	0
scf7180000056125	16130	0.4435	0	1021.8356	Eukaryota	1525.0	0	Platyhelminthes	580.0	2	Polystomatidea	580.0	2	Polystomatidae	580.0	2	Protopolystoma	580.0	2	Protopolystoma xenopodis	580.0	2
scf7180000046699	90576	0.5056	0	57.7544	Eukaryota	22663.0	0	Chordata	22663.0	0	Carnivora	22663.0	0	Canidae	22663.0	0	Canis	15058.0	1	Canis lupus	15058.0	1
scf7180000051319	19850	0.5042	0	1138.8044	Eukaryota	9525.0	0	Chordata	9525.0	0	Carnivora	9525.0	0	Canidae	9525.0	0	Canis	8281.0	1	Canis lupus	6993.0	2
scf7180000048912	12891	0.4327	0	124.0936	Eukaryota	2588.0	0	Chordata	2588.0	0	Carnivora	2588.0	0	Canidae	2588.0	0	Canis	2588.0	0	Canis lupus	2588.0	0
scf7180000044536	211552	0.4523	0	59.1355	Eukaryota	54868.0	0	Chordata	54868.0	0	Carnivora	54868.0	0	Canidae	54868.0	0	Canis	54868.0	0	Canis lupus	54868.0	0
scf7180000041690	282193	0.3663	0	60.5174	Eukaryota	81362.0	0	Chordata	81362.0	0	Carnivora	81362.0	0	Canidae	81362.0	0	Canis	81362.0	0	Canis lupus	81362.0	0
scf7180000055813	11815	0.4409	0	578.3161	no-hit	0.0	0	no-hit	0.0	0	no-hit	0.0	0	no-hit	0.0	0	no-hit	0.0	0	no-hit	0.0	0
scf7180000040924	119247	0.3664	0	57.8582	Eukaryota	11509.0	0	Chordata	11509.0	0	Primates	5882.0	2	Hominidae	5882.0	2	Homo	5198.0	3	Homo sapiens	5198.0	3
scf7180000042153	624082	0.3543	100	59.2726	Eukaryota	23253.0	0	Chordata	23253.0	0	Carnivora	23253.0	0	Canidae	23253.0	0	Canis	23253.0	0	Canis lupus	23253.0	0
scf7180000045516	210403	0.414	0	60.007	Eukaryota	62217.0	0	Chordata	62217.0	0	Carnivora	62217.0	0	Canidae	58394.0	1	Canis	47722.0	2	Canis lupus	47722.0	2
scf7180000056492	104910	0.4024	0	60.6245	Eukaryota	53356.0	0	Chordata	53356.0	0	Carnivora	53356.0	0	Canidae	53356.0	0	Canis	53356.0	0	Canis lupus	53356.0	0
scf7180000054660	23431	0.4353	0	221.3758	Eukaryota	1239.0	0	Platyhelminthes	673.0	1	Polystomatidea	673.0	1	Polystomatidae	673.0	1	Protopolystoma	673.0	1	Protopolystoma xenopodis	673.0	1
scf7180000050044	9510	0.5002	0	98.0948	Eukaryota	7665.0	0	Chordata	7665.0	0	Carnivora	7665.0	0	Canidae	7665.0	0	Canis	5680.0	1	Canis lupus	4540.0	2
scf7180000042618	129383	0.4064	0	56.6732	Eukaryota	39634.0	0	Chordata	39634.0	0	Carnivora	39634.0	0	Canidae	39634.0	0	Canis	39634.0	0	Canis lupus	39634.0	0
scf7180000045964	29740	0.4252	0	51.1205	Eukaryota	5936.0	0	Chordata	5936.0	0	Carnivora	5936.0	0	Otariidae	2971.0	1	Callorhinus	2383.0	3	Callorhinus ursinus	2383.0	3
scf7180000054815	22378	0.3878	0	173.593	Eukaryota	5842.0	0	Chordata	5014.0	1	Carnivora	3542.0	2	Canidae	2764.0	3	Canis	2764.0	3	Canis lupus	2764.0	3
scf7180000040813	1676055	0.4098	0	60.8035	Eukaryota	97267.0	0	Chordata	97267.0	0	Carnivora	97267.0	0	Canidae	97267.0	0	Canis	65278.0	1	Canis lupus	65278.0	1
scf7180000049194	26332	0.3938	0	180.4835	Eukaryota	74331.0	0	Chordata	74331.0	0	Carnivora	74331.0	0	Canidae	74331.0	0	Canis	74331.0	0	Canis lupus	74331.0	0
scf7180000047981	65206	0.3453	0	58.4798	Eukaryota	55319.0	0	Chordata	55319.0	0	Carnivora	55319.0	0	Canidae	55319.0	0	Canis	55319.0	0	Canis lupus	55319.0	0
scf7180000042270	109261	0.4745	0	57.8174	Eukaryota	50021.0	0	Chordata	50021.0	0	Carnivora	50021.0	0	Canidae	50021.0	0	Canis	42191.0	1	Canis lupus	42191.0	1
scf7180000042704	685084	0.4001	0	59.8417	Eukaryota	64934.0	0	Chordata	64934.0	0	Carnivora	64934.0	0	Canidae	39109.0	1	Canis	39109.0	4	Canis lupus	39109.0	4
scf7180000054639	26244	0.5081	0	323.1754	Eukaryota	4968.0	0	Chordata	4968.0	0	Carnivora	4244.0	1	Canidae	3907.0	3	Canis	3360.0	4	Canis lupus	3360.0	4
scf7180000043122	553804	0.3942	0	58.9701	Eukaryota	37750.0	0	Chordata	37750.0	0	Carnivora	21761.0	2	Canidae	18436.0	5	Canis	14319.0	7	Canis lupus	14319.0	7
scf7180000049442	28415	0.5061	0	799.052	Eukaryota	9958.0	0	Chordata	9958.0	0	Carnivora	9958.0	0	Canidae	9958.0	0	Canis	7932.0	2	Canis lupus	6622.0	3
scf7180000044953	163840	0.4677	0	59.1534	Eukaryota	54663.0	0	Chordata	54663.0	0	Carnivora	54663.0	0	Canidae	54663.0	0	Canis	54663.0	0	Canis lupus	54663.0	0
scf7180000040539	2429456	0.3986	0	60.5078	Eukaryota	59989.0	0	Chordata	59989.0	0	Carnivora	59989.0	0	Canidae	59989.0	0	Canis	51991.0	1	Canis lupus	51991.0	1
scf7180000055557	8483	0.4399	0	153.5602	Eukaryota	718.0	0	Platyhelminthes	518.0	1	Polystomatidea	518.0	1	Polystomatidae	518.0	1	Protopolystoma	518.0	1	Protopolystoma xenopodis	518.0	1
scf7180000045738	140624	0.4224	0	58.4271	Eukaryota	27676.0	0	Chordata	27676.0	0	Carnivora	27676.0	0	Canidae	27676.0	0	Canis	27676.0	0	Canis lupus	27676.0	0
scf7180000055251	65155	0.4441	0	139.6862	Eukaryota	9552.0	0	Chordata	9552.0	0	Carnivora	9552.0	0	Canidae	9552.0	0	Canis	5678.0	1	Canis lupus	5678.0	1
scf7180000054363	767058	0.4183	0	58.6617	Eukaryota	92013.0	0	Chordata	92013.0	0	Carnivora	92013.0	0	Canidae	92013.0	0	Canis	92013.0	0	Canis lupus	92013.0	0
scf7180000045538	528791	0.454	0	58.6846	Eukaryota	95815.0	0	Chordata	95815.0	0	Carnivora	95815.0	0	Canidae	95815.0	0	Canis	95815.0	0	Canis lupus	95815.0	0
scf7180000048899	2797	0.453	0	20.0025	Eukaryota	23823.0	0	Chordata	23823.0	0	Carnivora	23823.0	0	Canidae	23823.0	0	Canis	23823.0	0	Canis lupus	23823.0	0
scf7180000050550	30643	0.5027	0	383.3764	Eukaryota	9174.0	0	Chordata	9174.0	0	Carnivora	9174.0	0	Canidae	9174.0	0	Canis	7958.0	1	Canis lupus	6698.0	2
scf7180000052619	4829	0.4413	0	1461.7796	Eukaryota	1991.0	0	Platyhelminthes	791.0	2	Polystomatidea	791.0	2	Polystomatidae	791.0	2	Protopolystoma	791.0	2	Protopolystoma xenopodis	791.0	2
scf7180000048736	21170	0.5058	0	661.6138	Eukaryota	9275.0	0	Chordata	9275.0	0	Carnivora	9275.0	0	Canidae	9275.0	0	Canis	7537.0	1	Canis lupus	6315.0	2
scf7180000051431	5419	0.4388	0	73.1818	Eukaryota	557.0	0	Platyhelminthes	557.0	0	Polystomatidea	368.0	1	Polystomatidae	368.0	1	Protopolystoma	368.0	1	Protopolystoma xenopodis	368.0	1
scf7180000043974	374428	0.3975	0	59.658	Eukaryota	33288.0	0	Chordata	33288.0	0	Carnivora	33288.0	0	Canidae	33288.0	0	Canis	33288.0	0	Canis lupus	33288.0	0
scf7180000042931	74220	0.35	0	56.058	Eukaryota	25915.0	0	Chordata	25915.0	0	Carnivora	25915.0	0	Phocidae	5242.0	5	Odobenus	5127.0	8	Odobenus rosmarus	5127.0	8
scf7180000044354	317173	0.4998	0	57.3447	Eukaryota	28332.0	0	Chordata	28332.0	0	Carnivora	28332.0	0	Canidae	28332.0	0	Canis	19644.0	1	Canis lupus	19644.0	1
scf7180000048493	47474	0.3276	0	58.4194	Eukaryota	38789.0	0	Chordata	38789.0	0	Carnivora	38789.0	0	Canidae	38789.0	0	Canis	38789.0	0	Canis lupus	38789.0	0
scf7180000056287	983555	0.3938	0	61.606	Eukaryota	98355.0	0	Chordata	98355.0	0	Carnivora	98355.0	0	Canidae	98355.0	0	Canis	98355.0	0	Canis lupus	98355.0	0
scf7180000050474	8998	0.446	0	82.681	Eukaryota	5811.0	0	Echinodermata	2063.0	2	Forcipulatida	2063.0	4	Asteriidae	2063.0	4	Asterias	2063.0	4	Asterias rubens	2063.0	4
scf7180000054383	372228	0.4227	0	60.3637	Eukaryota	44794.0	0	Chordata	44794.0	0	Carnivora	44794.0	0	Canidae	44794.0	0	Canis	26850.0	1	Canis lupus	26850.0	1
scf7180000053339	4568	0.442	0	1742.9992	Eukaryota	2470.0	0	Platyhelminthes	1074.0	2	Polystomatidea	1074.0	2	Polystomatidae	1074.0	2	Protopolystoma	1074.0	2	Protopolystoma xenopodis	1074.0	2
scf7180000049806	4455	0.4496	0	181.4517	no-hit	0.0	0	no-hit	0.0	0	no-hit	0.0	0	no-hit	0.0	0	no-hit	0.0	0	no-hit	0.0	0
scf7180000048980	7221	0.454	0	54.7031	no-hit	0.0	0	no-hit	0.0	0	no-hit	0.0	0	no-hit	0.0	0	no-hit	0.0	0	no-hit	0.0	0
scf7180000046181	180374	0.4404	0	55.6996	Eukaryota	33243.0	0	Chordata	33243.0	0	Carnivora	27624.0	2	Canidae	8450.0	6	Canis	8450.0	7	Canis lupus	8450.0	8
scf7180000055612	12489	0.4398	0	279.3869	Eukaryota	6847.0	0	Chordata	4955.0	2	Kurtiformes	4744.0	3	Apogonidae	4744.0	3	Sphaeramia	4744.0	3	Sphaeramia orbicularis	4744.0	3
scf7180000041806	38200	0.4724	0	61.3386	Eukaryota	15299.0	0	Chordata	15299.0	0	Carnivora	15299.0	0	Canidae	15299.0	0	Canis	15299.0	0	Canis lupus	15299.0	0
scf7180000048603	31286	0.4386	0	140.7594	Eukaryota	3515.0	0	Platyhelminthes	2799.0	1	Polystomatidea	2799.0	2	Polystomatidae	2799.0	2	Protopolystoma	2799.0	2	Protopolystoma xenopodis	2799.0	2
scf7180000050971	19469	0.3381	0	55.9624	Eukaryota	5273.0	0	Chordata	5273.0	0	Carnivora	2250.0	2	Canidae	2250.0	2	Canis	2250.0	3	Canis lupus	2250.0	3
scf7180000052306	2494	0.4539	0	325.6899	Eukaryota	1904.0	0	Chordata	1532.0	1	Columbiformes	948.0	2	Columbidae	948.0	2	Streptopelia	948.0	2	Streptopelia turtur	948.0	2
scf7180000051589	6134	0.4405	0	1849.4823	no-hit	0.0	0	no-hit	0.0	0	no-hit	0.0	0	no-hit	0.0	0	no-hit	0.0	0	no-hit	0.0	0
scf7180000047595	97153	0.4138	0	70.9022	Eukaryota	53683.0	0	Chordata	53683.0	0	Carnivora	53683.0	0	Canidae	53683.0	0	Canis	53683.0	0	Canis lupus	53683.0	0
scf7180000052679	14227	0.5215	0	58.2276	Eukaryota	11398.0	0	Chordata	11398.0	0	Carnivora	11398.0	0	Canidae	11063.0	1	Canis	11063.0	1	Canis lupus	11063.0	1
scf7180000048341	2593	0.447	0	259.8166	no-hit	0.0	0	no-hit	0.0	0	no-hit	0.0	0	no-hit	0.0	0	no-hit	0.0	0	no-hit	0.0	0
scf7180000041804	349862	0.4231	0	58.8589	Eukaryota	77749.0	0	Chordata	77749.0	0	Carnivora	77749.0	0	Canidae	77749.0	0	Canis	77749.0	0	Canis lupus	77749.0	0
scf7180000049717	16826	0.4588	0	226.0166	Eukaryota	1200.0	0	Chordata	1200.0	0	Syngnathiformes	821.0	1	Syngnathidae	821.0	1	Syngnathus	821.0	1	Syngnathus acus	821.0	1
scf7180000048443	54835	0.368	0	59.4537	Eukaryota	69471.0	0	Chordata	69471.0	0	Carnivora	69471.0	0	Canidae	69471.0	0	Canis	69471.0	0	Canis lupus	69471.0	0
scf7180000041418	877605	0.4169	0	59.8643	Eukaryota	56525.0	0	Chordata	56525.0	0	Carnivora	56525.0	0	Canidae	56525.0	0	Canis	38813.0	1	Canis lupus	38813.0	1
scf7180000050729	6463	0.4425	0	68.7486	no-hit	0.0	0	no-hit	0.0	0	no-hit	0.0	0	no-hit	0.0	0	no-hit	0.0	0	no-hit	0.0	0
scf7180000054729	24069	0.4689	0	203.8369	Eukaryota	85825.0	0	Chordata	85825.0	0	Carnivora	85825.0	0	Canidae	85825.0	0	Canis	85825.0	0	Canis lupus	85825.0	0
scf7180000055248	10134	0.4417	0	130.8023	Eukaryota	3090.0	0	Echinodermata	1875.0	2	Forcipulatida	1875.0	3	Asteriidae	1875.0	3	Asterias	1875.0	3	Asterias rubens	1875.0	3
scf7180000040645	126756	0.5551	0	55.5998	Eukaryota	23440.0	0	Chordata	23440.0	0	Carnivora	23440.0	0	Canidae	23440.0	0	Canis	21151.0	1	Canis lupus	21151.0	1
scf7180000044360	49060	0.369	0	51.1207	Eukaryota	6115.0	0	Chordata	6115.0	0	Carnivora	4925.0	2	Canidae	4925.0	2	Canis	4925.0	2	Canis lupus	4925.0	2
scf7180000045203	204174	0.4595	0	60.2554	Eukaryota	80372.0	0	Chordata	80372.0	0	Carnivora	80372.0	0	Canidae	80372.0	0	Canis	80372.0	0	Canis lupus	80372.0	0
scf7180000052251	14233	0.4519	0	80.7456	Eukaryota	55143.0	0	Chordata	55143.0	0	Carnivora	55143.0	0	Canidae	55143.0	0	Canis	55143.0	0	Canis lupus	55143.0	0
scf7180000040611	236869	0.3883	0	59.1703	Eukaryota	42875.0	0	Chordata	42875.0	0	Carnivora	42875.0	0	Canidae	42875.0	0	Canis	42875.0	0	Canis lupus	42875.0	0
scf7180000056579	89855	0.3866	0	60.4332	Eukaryota	7491.0	0	Chordata	7491.0	0	Primates	5391.0	1	Hominidae	4115.0	3	Homo	4115.0	3	Homo sapiens	4115.0	3
scf7180000042351	715664	0.3557	0	60.5802	Eukaryota	87714.0	0	Chordata	87714.0	0	Carnivora	87714.0	0	Canidae	87714.0	0	Canis	87714.0	0	Canis lupus	87714.0	0
scf7180000044347	319600	0.3647	0	60.8777	Eukaryota	29771.0	0	Chordata	29771.0	0	Carnivora	29771.0	0	Canidae	29771.0	0	Vulpes	22434.0	1	Vulpes vulpes	22434.0	1
scf7180000045731	218745	0.3567	0	58.8231	Eukaryota	88212.0	0	Chordata	88212.0	0	Carnivora	88212.0	0	Canidae	88212.0	0	Canis	88212.0	0	Canis lupus	88212.0	0
scf7180000043839	256014	0.3421	0	58.9138	Eukaryota	91655.0	0	Chordata	91655.0	0	Carnivora	91655.0	0	Canidae	91655.0	0	Canis	91655.0	0	Canis lupus	91655.0	0
scf7180000056460	157830	0.343	0	64.2598	Eukaryota	90003.0	0	Chordata	90003.0	0	Carnivora	90003.0	0	Canidae	90003.0	0	Canis	90003.0	0	Canis lupus	90003.0	0
scf7180000043977	3210	0.4333	0	46.896	Eukaryota	20213.0	0	Chordata	20213.0	0	Carnivora	20213.0	0	Canidae	20213.0	0	Canis	20213.0	0	Canis lupus	20213.0	0
scf7180000044423	318504	0.3757	0	60.9054	Eukaryota	89629.0	0	Chordata	89629.0	0	Carnivora	89629.0	0	Canidae	89629.0	0	Canis	89629.0	0	Canis lupus	89629.0	0
scf7180000046987	102867	0.4421	0	55.4399	Eukaryota	77581.0	0	Chordata	77581.0	0	Carnivora	77581.0	0	Canidae	77581.0	0	Canis	77581.0	0	Canis lupus	77581.0	0
scf7180000040684	1587697	0.4389	0	58.8343	Eukaryota	163887.0	0	Chordata	163887.0	0	Carnivora	163887.0	0	Canidae	163887.0	0	Canis	163887.0	0	Canis lupus	163887.0	0
scf7180000052601	4647	0.4407	0	116.4737	Eukaryota	1556.0	0	Chordata	1275.0	1	Columbiformes	907.0	2	Columbidae	907.0	2	Streptopelia	907.0	2	Streptopelia turtur	907.0	2
scf7180000046551	54930	0.4086	0	50.9967	Eukaryota	12624.0	0	Chordata	12624.0	0	Carnivora	12624.0	0	Canidae	12624.0	0	Canis	12624.0	0	Canis lupus	12624.0	0
scf7180000055356	28182	0.5386	0	622.5075	Eukaryota	15984.0	0	Chordata	15984.0	0	Carnivora	15984.0	0	Canidae	15984.0	0	Canis	15984.0	0	Canis lupus	15984.0	0
scf7180000044973	250998	0.3571	0	60.3643	Eukaryota	25317.0	0	Chordata	25317.0	0	Carnivora	25317.0	0	Canidae	25317.0	0	Canis	25317.0	0	Canis lupus	25317.0	0
scf7180000044785	207294	0.395	0	59.5588	Eukaryota	36539.0	0	Chordata	36539.0	0	Carnivora	36539.0	0	Canidae	36539.0	0	Canis	36539.0	0	Canis lupus	36539.0	0
scf7180000048830	44195	0.4546	0	85.9435	Eukaryota	87490.0	0	Chordata	87490.0	0	Carnivora	87490.0	0	Canidae	87490.0	0	Canis	87490.0	0	Canis lupus	87490.0	0
scf7180000051848	2153	0.4552	0	246.9835	no-hit	0.0	0	no-hit	0.0	0	no-hit	0.0	0	no-hit	0.0	0	no-hit	0.0	0	no-hit	0.0	0
scf7180000052463	3547	0.4452	0	258.4573	Eukaryota	16835.0	0	Chordata	12387.0	2	Gadiformes	8265.0	5	Gadidae	8265.0	5	Gadus	8265.0	5	Gadus morhua	8265.0	5
scf7180000049369	6950	0.4393	0	98.7705	no-hit	0.0	0	no-hit	0.0	0	no-hit	0.0	0	no-hit	0.0	0	no-hit	0.0	0	no-hit	0.0	0
scf7180000052852	7137	0.4377	0	101.8522	Eukaryota	3379.0	0	Chordata	3379.0	0	Kurtiformes	3379.0	0	Apogonidae	3379.0	0	Sphaeramia	3379.0	0	Sphaeramia orbicularis	3379.0	0
scf7180000055358	23352	0.4396	0	177.1337	Eukaryota	326.0	0	Platyhelminthes	326.0	0	Polystomatidea	326.0	0	Polystomatidae	326.0	0	Protopolystoma	326.0	0	Protopolystoma xenopodis	326.0	0
scf7180000043333	466181	0.4231	0	58.9291	Eukaryota	32276.0	0	Chordata	32276.0	0	Carnivora	32276.0	0	Canidae	13278.0	3	Canis	13278.0	3	Canis lupus	13278.0	3
scf7180000049947	4825	0.4311	0	78.8474	no-hit	0.0	0	no-hit	0.0	0	no-hit	0.0	0	no-hit	0.0	0	no-hit	0.0	0	no-hit	0.0	0
scf7180000041756	120764	0.3693	0	54.6631	Eukaryota	6347.0	1	Chordata	6347.0	1	Primates	2963.0	3	Hominidae	2963.0	3	Homo	2963.0	4	Homo sapiens	2963.0	4
scf7180000053916	3194	0.449	0	560.5197	Eukaryota	2496.0	0	Echinodermata	926.0	3	Forcipulatida	926.0	3	Asteriidae	926.0	3	Asterias	926.0	3	Asterias rubens	926.0	3
scf7180000046904	10010	0.4354	0	239.2914	no-hit	0.0	0	no-hit	0.0	0	no-hit	0.0	0	no-hit	0.0	0	no-hit	0.0	0	no-hit	0.0	0
scf7180000043842	113502	0.4046	0	83.1938	Eukaryota	49215.0	0	Chordata	49215.0	0	Carnivora	49215.0	0	Canidae	43908.0	2	Canis	35395.0	3	Canis lupus	35395.0	3
scf7180000052482	18394	0.3421	0	57.6981	Eukaryota	2974.0	1	Chordata	2974.0	1	Carnivora	1797.0	2	Canidae	1797.0	2	Canis	1797.0	3	Canis lupus	1797.0	3
scf7180000050844	29170	0.5177	0	59.769	Eukaryota	6211.0	0	Chordata	6211.0	0	Carnivora	6211.0	0	Canidae	5712.0	1	Canis	5712.0	1	Canis lupus	5712.0	1
scf7180000046374	40927	0.3939	0	54.384	Eukaryota	34588.0	0	Chordata	34588.0	0	Carnivora	34588.0	0	Canidae	34588.0	0	Canis	34588.0	0	Canis lupus	34588.0	0
scf7180000050538	4806	0.4476	0	239.2641	Eukaryota	2683.0	0	Chordata	2253.0	1	Tetraodontiformes	1719.0	3	Tetraodontidae	1719.0	3	Takifugu	1719.0	3	Takifugu rubripes	1719.0	3
scf7180000051159	4611	0.4407	0	145.7131	no-hit	0.0	0	no-hit	0.0	0	no-hit	0.0	0	no-hit	0.0	0	no-hit	0.0	0	no-hit	0.0	0
scf7180000053530	2078	0.449	0	197.8558	no-hit	0.0	0	no-hit	0.0	0	no-hit	0.0	0	no-hit	0.0	0	no-hit	0.0	0	no-hit	0.0	0
scf7180000052771	29612	0.3764	0	59.9445	Eukaryota	20122.0	0	Chordata	20122.0	0	Carnivora	20122.0	0	Canidae	20122.0	0	Canis	17440.0	1	Canis lupus	17440.0	1
scf7180000046262	33398	0.4422	0	128.0599	Eukaryota	92386.0	0	Chordata	92386.0	0	Carnivora	92386.0	0	Canidae	92386.0	0	Canis	92386.0	0	Canis lupus	92386.0	0
scf7180000048844	2214	0.4476	0	181.0008	no-hit	0.0	0	no-hit	0.0	0	no-hit	0.0	0	no-hit	0.0	0	no-hit	0.0	0	no-hit	0.0	0
scf7180000043266	528395	0.5487	0	57.1062	Eukaryota	59955.0	0	Chordata	59955.0	0	Carnivora	59955.0	0	Canidae	59955.0	0	Canis	59955.0	0	Canis lupus	59955.0	0
scf7180000050034	4070	0.4437	0	790.7239	no-hit	0.0	0	no-hit	0.0	0	no-hit	0.0	0	no-hit	0.0	0	no-hit	0.0	0	no-hit	0.0	0
scf7180000050492	8048	0.4459	0	51.5392	Eukaryota	14850.0	0	Chordata	12483.0	3	Gadiformes	10045.0	5	Gadidae	10045.0	5	Gadus	10045.0	5	Gadus morhua	10045.0	5
scf7180000048104	23002	0.4637	0	56.0551	Eukaryota	9650.0	0	Chordata	9650.0	0	Carnivora	9650.0	0	Canidae	9650.0	0	Canis	7844.0	1	Canis lupus	6563.0	2
scf7180000044366	3358	0.436	0	187.608	Eukaryota	764.0	0	Chordata	764.0	0	Kurtiformes	764.0	0	Apogonidae	764.0	0	Sphaeramia	764.0	0	Sphaeramia orbicularis	764.0	0
scf7180000040903	33051	0.3582	0	56.1479	Eukaryota	93045.0	0	Chordata	93045.0	0	Carnivora	93045.0	0	Canidae	93045.0	0	Canis	93045.0	0	Canis lupus	93045.0	0
scf7180000041851	46808	0.4369	0	109.1367	Eukaryota	65548.0	0	Chordata	65548.0	0	Carnivora	65548.0	0	Canidae	65548.0	0	Canis	65548.0	0	Canis lupus	65548.0	0
scf7180000040483	3619195	0.4076	0	60.2561	Eukaryota	99065.0	0	Chordata	99065.0	0	Carnivora	99065.0	0	Canidae	99065.0	0	Canis	99065.0	0	Canis lupus	99065.0	0
scf7180000041754	280962	0.3832	0	59.2201	Eukaryota	34976.0	0	Chordata	34976.0	0	Carnivora	34976.0	0	Canidae	34976.0	0	Canis	34976.0	0	Canis lupus	34976.0	0
scf7180000053548	6345	0.5039	0	151.394	Eukaryota	8567.0	0	Chordata	8567.0	0	Carnivora	8567.0	0	Canidae	8567.0	0	Canis	6923.0	1	Canis lupus	5732.0	2
scf7180000055447	19884	0.4459	0	55.7629	Eukaryota	2410.0	0	Chordata	1513.0	1	Tetraodontiformes	1283.0	2	Tetraodontidae	1283.0	2	Takifugu	1283.0	2	Takifugu rubripes	1283.0	2
scf7180000047804	24506	0.4377	0	95.1952	Eukaryota	11531.0	0	Chordata	6438.0	2	Strigeidida	3711.0	6	Schistosomatidae	3711.0	6	Schistosoma	3711.0	6	Schistosoma mansoni	3711.0	6
scf7180000046482	11681	0.4434	0	82.3359	Eukaryota	13349.0	0	Chordata	13349.0	0	Kurtiformes	6240.0	2	Apogonidae	6240.0	2	Sphaeramia	6240.0	2	Sphaeramia orbicularis	6240.0	2
scf7180000043995	21899	0.3286	0	40.8525	Eukaryota	3270.0	0	Chordata	3270.0	0	Carnivora	3270.0	0	Canidae	3270.0	0	Canis	2943.0	1	Canis lupus	2943.0	1
scf7180000044362	214278	0.4362	0	59.4652	Eukaryota	44845.0	0	Chordata	44845.0	0	Carnivora	44845.0	0	Canidae	44845.0	0	Canis	44845.0	0	Canis lupus	44845.0	0
scf7180000041845	896661	0.3974	0	59.9369	Eukaryota	83737.0	0	Chordata	83737.0	0	Carnivora	83737.0	0	Canidae	83737.0	0	Canis	83737.0	0	Canis lupus	83737.0	0
scf7180000049533	4099	0.436	0	80.6873	Eukaryota	362.0	0	Chordata	362.0	0	Beloniformes	362.0	0	Adrianichthyidae	362.0	0	Oryzias	362.0	0	Oryzias latipes	362.0	0
scf7180000049619	5464	0.4286	0	111.9642	no-hit	0.0	0	no-hit	0.0	0	no-hit	0.0	0	no-hit	0.0	0	no-hit	0.0	0	no-hit	0.0	0
scf7180000047517	3762	0.4508	0	362.8319	Eukaryota	791.0	0	Chordata	791.0	0	Salmoniformes	791.0	0	Salmonidae	791.0	0	Coregonus	791.0	0	Coregonus sp. 'balchen'	791.0	0
scf7180000042122	805253	0.4266	0	59.6906	Eukaryota	91714.0	0	Chordata	91714.0	0	Carnivora	91714.0	0	Canidae	91714.0	0	Canis	91714.0	0	Canis lupus	91714.0	0
scf7180000050710	4179	0.4503	0	296.3646	Eukaryota	299.0	0	Chordata	299.0	0	Salmoniformes	299.0	0	Salmonidae	299.0	0	Salmo	152.0	1	Salmo trutta	152.0	1
scf7180000052730	3142	0.4478	0	139.6332	Eukaryota	354.0	0	Platyhelminthes	354.0	0	Polystomatidea	354.0	0	Polystomatidae	354.0	0	Protopolystoma	354.0	0	Protopolystoma xenopodis	354.0	0
scf7180000042573	624076	0.4126	0	59.2124	Eukaryota	95405.0	0	Chordata	95405.0	0	Carnivora	95405.0	0	Canidae	95405.0	0	Canis	95405.0	0	Canis lupus	95405.0	0
scf7180000046835	28505	0.439	0	752.9707	Eukaryota	55500.0	0	Chordata	55500.0	0	Carnivora	55500.0	0	Canidae	55500.0	0	Canis	55500.0	0	Canis lupus	55500.0	0
scf7180000055045	22619	0.3956	0	668.3826	Eukaryota	80268.0	0	Chordata	80268.0	0	Carnivora	80268.0	0	Canidae	80268.0	0	Canis	80268.0	0	Canis lupus	80268.0	0
scf7180000040994	21838	0.4378	0	188.157	Eukaryota	239.0	0	Platyhelminthes	239.0	0	Polystomatidea	239.0	0	Polystomatidae	239.0	0	Protopolystoma	239.0	0	Protopolystoma xenopodis	239.0	0
scf7180000053437	3993	0.4533	0	997.3394	Eukaryota	641.0	0	Chordata	641.0	0	Salmoniformes	641.0	0	Salmonidae	641.0	0	Salmo	641.0	0	Salmo trutta	641.0	0
scf7180000041098	1227713	0.4103	0	59.8796	Eukaryota	89989.0	0	Chordata	89989.0	0	Carnivora	89989.0	0	Canidae	89989.0	0	Canis	89989.0	0	Canis lupus	89989.0	0
scf7180000042656	686672	0.3966	0	59.2212	Eukaryota	74949.0	0	Chordata	74949.0	0	Carnivora	74949.0	0	Canidae	40183.0	1	Canis	28667.0	4	Canis lupus	28667.0	4
scf7180000041937	848310	0.3778	0	59.9177	Eukaryota	50119.0	0	Chordata	50119.0	0	Carnivora	50119.0	0	Canidae	45886.0	1	Canis	39132.0	2	Canis lupus	39132.0	2
scf7180000046499	108666	0.4398	0	59.4402	Eukaryota	8112.0	0	Chordata	8112.0	0	Carnivora	5301.0	1	Canidae	5301.0	2	Canis	5301.0	2	Canis lupus	5301.0	2
scf7180000052150	9589	0.4514	0	1970.9159	Eukaryota	1915.0	0	Echinodermata	889.0	2	Forcipulatida	889.0	2	Asteriidae	889.0	2	Asterias	889.0	2	Asterias rubens	889.0	2
scf7180000045712	3853	0.4487	0	166.2072	Eukaryota	15504.0	0	Chordata	11215.0	2	Gadiformes	7450.0	6	Gadidae	7450.0	6	Gadus	7450.0	6	Gadus morhua	7450.0	6
scf7180000047863	3310	0.4444	0	72.9554	no-hit	0.0	0	no-hit	0.0	0	no-hit	0.0	0	no-hit	0.0	0	no-hit	0.0	0	no-hit	0.0	0
scf7180000053867	1903	0.444	0	159.7818	Eukaryota	656.0	0	Platyhelminthes	656.0	0	Polystomatidea	656.0	0	Polystomatidae	656.0	0	Protopolystoma	656.0	0	Protopolystoma xenopodis	656.0	0
scf7180000054936	17620	0.4447	0	139.0955	Eukaryota	1050.0	0	Chordata	1050.0	0	Carnivora	1050.0	0	Canidae	1050.0	0	Canis	738.0	1	Canis lupus	738.0	1
scf7180000046811	46640	0.438	0	81.2428	Eukaryota	56958.0	0	Chordata	56958.0	0	Carnivora	56958.0	0	Canidae	56958.0	0	Canis	56958.0	0	Canis lupus	56958.0	0
scf7180000045828	87639	0.4625	0	62.0979	Eukaryota	15695.0	0	Chordata	15695.0	0	Carnivora	15695.0	0	Canidae	15695.0	0	Canis	15695.0	0	Canis lupus	15695.0	0
scf7180000051348	9481	0.5055	0	312.6815	Eukaryota	8989.0	0	Chordata	8989.0	0	Carnivora	8989.0	0	Canidae	8989.0	0	Canis	7810.0	1	Canis lupus	6577.0	2
scf7180000053153	2238	0.4446	0	168.7696	Eukaryota	1221.0	0	Streptophyta	457.0	2	Fabales	457.0	2	Fabaceae	457.0	2	Cicer	457.0	2	Cicer arietinum	457.0	2
scf7180000042262	724491	0.3654	0	61.0954	Eukaryota	46570.0	0	Chordata	46570.0	0	Carnivora	46570.0	0	Canidae	46570.0	0	Canis	27779.0	1	Canis lupus	27779.0	1
scf7180000044600	317826	0.4291	0	59.3638	Eukaryota	29598.0	0	Chordata	29598.0	0	Carnivora	29598.0	0	Canidae	29598.0	0	Canis	29598.0	0	Canis lupus	29598.0	0
scf7180000047052	28123	0.441	0	229.7946	Eukaryota	3540.0	0	Chordata	3540.0	0	Kurtiformes	3540.0	0	Apogonidae	3540.0	0	Sphaeramia	3540.0	0	Sphaeramia orbicularis	3540.0	0
scf7180000048444	38268	0.3692	0	61.3962	Eukaryota	8333.0	1	Chordata	8333.0	1	Carnivora	6195.0	4	Ursidae	4046.0	6	Ursus	4046.0	6	Ursus arctos	4046.0	6
scf7180000045798	36595	0.386	0	52.1574	Eukaryota	6006.0	0	Chordata	6006.0	0	Carnivora	3170.0	1	Hominidae	2836.0	3	Canis	1939.0	4	Canis lupus	1939.0	4
scf7180000041007	1616640	0.4062	0	60.2276	Eukaryota	100347.0	0	Chordata	100347.0	0	Carnivora	100347.0	0	Canidae	100347.0	0	Canis	100347.0	0	Canis lupus	100347.0	0
scf7180000048738	77651	0.4142	0	58.085	Eukaryota	10194.0	0	Chordata	10194.0	0	Carnivora	4958.0	3	Ursidae	2974.0	5	Ursus	2974.0	6	Canis lupus	1984.0	8
scf7180000042271	718865	0.3365	0	58.5865	Eukaryota	91175.0	0	Chordata	91175.0	0	Carnivora	91175.0	0	Canidae	91175.0	0	Canis	91175.0	0	Canis lupus	91175.0	0
scf7180000055589	5586	0.4456	0	99.9226	no-hit	0.0	0	no-hit	0.0	0	no-hit	0.0	0	no-hit	0.0	0	no-hit	0.0	0	no-hit	0.0	0
scf7180000052707	4673	0.4376	0	225.3311	Eukaryota	623.0	0	Chordata	345.0	1	Polystomatidea	278.0	2	Polystomatidae	278.0	2	Protopolystoma	278.0	2	Protopolystoma xenopodis	278.0	2
scf7180000046815	98879	0.4161	0	55.4035	Eukaryota	14656.0	0	Chordata	14656.0	0	Carnivora	14656.0	0	Canidae	6214.0	2	Canis	4714.0	5	Canis lupus	4714.0	5
scf7180000041762	110636	0.3458	0	59.8895	Eukaryota	71302.0	0	Chordata	71302.0	0	Carnivora	71302.0	0	Canidae	71302.0	0	Canis	71302.0	0	Canis lupus	71302.0	0
scf7180000046437	100397	0.3544	0	60.7422	Eukaryota	35504.0	0	Chordata	35504.0	0	Carnivora	35504.0	0	Canidae	25765.0	2	Canis	18459.0	3	Canis lupus	18459.0	3
scf7180000045581	197827	0.328	0	58.716	Eukaryota	20989.0	0	Chordata	20989.0	0	Carnivora	20989.0	0	Felidae	20989.0	0	Felis	20989.0	0	Felis catus	20989.0	0
scf7180000047548	68152	0.459	0	59.7625	Eukaryota	33645.0	0	Chordata	33645.0	0	Rodentia	15313.0	3	Muridae	15313.0	3	Mus	15313.0	4	Mus musculus	15313.0	4
scf7180000041787	198883	0.476	0	58.7771	Eukaryota	16965.0	1	Chordata	16965.0	1	Carnivora	14033.0	3	Canidae	10884.0	4	Canis	9931.0	5	Canis lupus	9931.0	5
scf7180000043107	252393	0.3968	0	63.3	Eukaryota	37396.0	0	Chordata	37396.0	0	Carnivora	37396.0	0	Canidae	37396.0	0	Canis	37396.0	0	Canis lupus	37396.0	0
scf7180000055171	37911	0.4459	0	149.0225	Eukaryota	761.0	0	Chordata	761.0	0	Kurtiformes	454.0	1	Apogonidae	454.0	1	Sphaeramia	454.0	1	Sphaeramia orbicularis	454.0	1
scf7180000043088	560785	0.4122	0	59.0829	Eukaryota	91726.0	0	Chordata	91726.0	0	Carnivora	91726.0	0	Canidae	91726.0	0	Canis	91726.0	0	Canis lupus	91726.0	0
scf7180000045015	304896	0.4597	0	59.7707	Eukaryota	80098.0	0	Chordata	80098.0	0	Carnivora	80098.0	0	Canidae	80098.0	0	Canis	80098.0	0	Canis lupus	80098.0	0
scf7180000053857	4266	0.4543	0	489.205	Eukaryota	1964.0	0	Chordata	1655.0	1	Gonorynchiformes	902.0	3	Chanidae	902.0	3	Chanos	902.0	3	Chanos chanos	902.0	3
scf7180000041067	208506	0.4304	0	58.168	Eukaryota	24381.0	0	Chordata	24381.0	0	Carnivora	24381.0	0	Canidae	16456.0	3	Vulpes	12431.0	4	Vulpes vulpes	12431.0	4
scf7180000041515	1008408	0.3874	0	58.8994	Eukaryota	46825.0	0	Chordata	46825.0	0	Carnivora	46825.0	0	Canidae	46825.0	0	Canis	46825.0	0	Canis lupus	46825.0	0
scf7180000047033	107904	0.3955	0	59.1992	Eukaryota	32499.0	0	Chordata	32499.0	0	Carnivora	32499.0	0	Canidae	32499.0	0	Canis	32499.0	0	Canis lupus	32499.0	0
scf7180000050374	34774	0.3651	0	61.1221	Eukaryota	12473.0	0	Chordata	12473.0	0	Carnivora	12473.0	0	Canidae	4895.0	2	Odobenus	3525.0	4	Odobenus rosmarus	3525.0	4
scf7180000045968	150993	0.4001	0	57.8159	Eukaryota	93347.0	0	Chordata	93347.0	0	Carnivora	93347.0	0	Canidae	40196.0	2	Canis	30078.0	4	Canis lupus	30078.0	5
scf7180000045663	50409	0.3835	0	57.7023	Eukaryota	32417.0	0	Chordata	32417.0	0	Carnivora	32417.0	0	Canidae	32417.0	0	Canis	32417.0	0	Canis lupus	32417.0	0
scf7180000054954	22149	0.391	0	527.1444	Eukaryota	36058.0	0	Chordata	36058.0	0	Carnivora	36058.0	0	Canidae	36058.0	0	Canis	36058.0	0	Canis lupus	36058.0	0
scf7180000045115	22563	0.4101	0	53.3976	Eukaryota	4608.0	1	Chordata	4608.0	1	Primates	2226.0	4	Hominidae	2226.0	5	Homo	2226.0	6	Homo sapiens	2226.0	6
scf7180000054038	4390	0.4599	0	72.1972	no-hit	0.0	0	no-hit	0.0	0	no-hit	0.0	0	no-hit	0.0	0	no-hit	0.0	0	no-hit	0.0	0
scf7180000056555	106415	0.4219	0	56.554	Eukaryota	34329.0	0	Chordata	34329.0	0	Carnivora	34329.0	0	Canidae	34329.0	0	Canis	34329.0	0	Canis lupus	34329.0	0
scf7180000046388	12578	0.422	0	65.9338	Eukaryota	1687.0	0	Chordata	1687.0	0	Carnivora	1687.0	0	Canidae	1687.0	0	Canis	1687.0	0	Canis lupus	1687.0	0
scf7180000042870	782297	0.4985	0	59.0659	Eukaryota	65639.0	0	Chordata	65639.0	0	Carnivora	65639.0	0	Canidae	65639.0	0	Canis	61201.0	1	Canis lupus	61201.0	1
scf7180000044534	317520	0.6099	0	55.2217	Eukaryota	71183.0	0	Chordata	71183.0	0	Carnivora	71183.0	0	Canidae	71183.0	0	Canis	52304.0	1	Canis lupus	52304.0	1
scf7180000050316	20035	0.4559	0	2622.2337	Eukaryota	44569.0	0	Chordata	44569.0	0	Carnivora	44569.0	0	Canidae	44569.0	0	Canis	44569.0	0	Canis lupus	44569.0	0
scf7180000046521	43533	0.4472	0	250.7168	Eukaryota	3304.0	0	Chordata	2018.0	1	Polystomatidea	1286.0	3	Polystomatidae	1286.0	3	Protopolystoma	1286.0	3	Protopolystoma xenopodis	1286.0	3
scf7180000051392	7456	0.4476	0	1243.7136	no-hit	0.0	0	no-hit	0.0	0	no-hit	0.0	0	no-hit	0.0	0	no-hit	0.0	0	no-hit	0.0	0
scf7180000048412	48710	0.4389	0	236.8593	Eukaryota	629.0	0	Chordata	629.0	0	Kurtiformes	425.0	1	Apogonidae	425.0	1	Sphaeramia	425.0	1	Sphaeramia orbicularis	425.0	1
scf7180000048866	15643	0.4467	0	113.3578	Eukaryota	12924.0	0	Platyhelminthes	12737.0	1	Strigeidida	11287.0	2	Schistosomatidae	11287.0	2	Schistosoma	11287.0	2	Schistosoma mansoni	11287.0	2
scf7180000043315	48540	0.367	0	56.6942	Eukaryota	69389.0	0	Chordata	69389.0	0	Carnivora	69389.0	0	Canidae	69389.0	0	Canis	69389.0	0	Canis lupus	69389.0	0
scf7180000056548	229454	0.3875	0	60.2897	Eukaryota	22585.0	0	Chordata	22585.0	0	Carnivora	22585.0	0	Canidae	21026.0	1	Canis	18577.0	2	Canis lupus	18577.0	2
scf7180000048455	26386	0.443	0	148.9158	Eukaryota	6294.0	0	Chordata	4647.0	1	Polystomatidea	1647.0	5	Polystomatidae	1647.0	5	Protopolystoma	1647.0	5	Protopolystoma xenopodis	1647.0	5
scf7180000048065	47782	0.4595	0	118.9176	Eukaryota	14121.0	0	Chordata	14121.0	0	Carnivora	14121.0	0	Canidae	14121.0	0	Canis	8319.0	1	Canis lupus	8319.0	1
scf7180000046753	43419	0.4396	0	126.3453	Eukaryota	9545.0	0	Chordata	8343.0	1	Kurtiformes	3984.0	3	Apogonidae	3984.0	3	Sphaeramia	3984.0	3	Sphaeramia orbicularis	3984.0	4
scf7180000054809	23449	0.4539	0	196.6089	no-hit	0.0	0	no-hit	0.0	0	no-hit	0.0	0	no-hit	0.0	0	no-hit	0.0	0	no-hit	0.0	0
scf7180000053690	2078	0.4533	0	610.1599	no-hit	0.0	0	no-hit	0.0	0	no-hit	0.0	0	no-hit	0.0	0	no-hit	0.0	0	no-hit	0.0	0
scf7180000049034	48092	0.4702	0	56.4026	Eukaryota	40256.0	0	Chordata	40256.0	0	Carnivora	40256.0	0	Otariidae	15119.0	2	Zalophus	15119.0	4	Zalophus californianus	15119.0	4
scf7180000044486	12354	0.4088	0	39.0411	Eukaryota	21531.0	0	Chordata	21531.0	0	Carnivora	21531.0	0	Canidae	18683.0	2	Canis	17598.0	4	Canis lupus	17598.0	4
scf7180000050117	12817	0.4477	0	2147.5345	Eukaryota	2654.0	0	Platyhelminthes	960.0	3	Polystomatidea	960.0	3	Polystomatidae	960.0	3	Protopolystoma	960.0	3	Protopolystoma xenopodis	960.0	3
scf7180000040674	1819777	0.4285	0	59.5658	Eukaryota	92150.0	0	Chordata	92150.0	0	Carnivora	92150.0	0	Canidae	92150.0	0	Canis	92150.0	0	Canis lupus	92150.0	0
scf7180000045268	235111	0.3549	0	60.2851	Eukaryota	19458.0	0	Chordata	19458.0	0	Carnivora	9021.0	2	Hominidae	8231.0	3	Homo	8231.0	3	Homo sapiens	8231.0	3
scf7180000041881	20412	0.4454	0	392.3476	Eukaryota	92390.0	0	Chordata	92390.0	0	Carnivora	92390.0	0	Canidae	92390.0	0	Canis	92390.0	0	Canis lupus	92390.0	0
scf7180000052226	10347	0.5028	0	1357.3486	Eukaryota	8874.0	0	Chordata	8874.0	0	Carnivora	8874.0	0	Canidae	8874.0	0	Canis	7697.0	1	Canis lupus	6521.0	2
scf7180000042496	24999	0.4153	0	52.4881	Eukaryota	13705.0	0	Chordata	13705.0	0	Carnivora	10790.0	1	Canidae	10790.0	1	Canis	10790.0	1	Canis lupus	10790.0	1
scf7180000047171	89000	0.5093	0	57.7114	Eukaryota	12088.0	0	Chordata	12088.0	0	Carnivora	10737.0	1	Canidae	10737.0	2	Canis	10737.0	2	Canis lupus	10737.0	2
scf7180000050925	3672	0.4493	0	563.0261	no-hit	0.0	0	no-hit	0.0	0	no-hit	0.0	0	no-hit	0.0	0	no-hit	0.0	0	no-hit	0.0	0
scf7180000050156	4409	0.4507	0	182.7841	no-hit	0.0	0	no-hit	0.0	0	no-hit	0.0	0	no-hit	0.0	0	no-hit	0.0	0	no-hit	0.0	0
scf7180000044717	29773	0.6615	0	48.4331	Eukaryota	4856.0	0	Chordata	4856.0	0	Carnivora	4856.0	0	Canidae	4856.0	0	Canis	4368.0	1	Canis lupus	4368.0	1
scf7180000046986	126011	0.3777	0	59.1387	Eukaryota	5218.0	0	Chordata	5218.0	0	Carnivora	5218.0	0	Canidae	5218.0	0	Canis	5218.0	0	Canis lupus	5218.0	0
scf7180000049133	12670	0.4422	0	75.7241	Eukaryota	9335.0	0	Chordata	7401.0	1	Tetraodontiformes	4260.0	3	Tetraodontidae	4260.0	3	Takifugu	4260.0	3	Takifugu rubripes	4260.0	3
scf7180000042286	700693	0.428	0	59.8769	Eukaryota	34232.0	0	Chordata	34232.0	0	Carnivora	34232.0	0	Canidae	34232.0	0	Canis	20582.0	1	Canis lupus	20582.0	1
scf7180000044983	248860	0.3957	0	57.7167	Eukaryota	46080.0	0	Chordata	46080.0	0	Carnivora	46080.0	0	Canidae	46080.0	0	Canis	40072.0	1	Canis lupus	40072.0	1
scf7180000055339	11432	0.4401	0	299.4829	Eukaryota	19646.0	0	Chordata	11930.0	1	Strigeidida	7716.0	5	Schistosomatidae	7716.0	5	Schistosoma	7716.0	5	Schistosoma mansoni	7716.0	6
scf7180000051483	20548	0.4413	0	58.4313	Eukaryota	4247.0	0	Chordata	4028.0	1	Salmoniformes	4028.0	1	Salmonidae	4028.0	1	Salmo	3506.0	2	Salmo trutta	3506.0	2
scf7180000050891	16424	0.5359	0	3724.1958	Eukaryota	33372.0	0	Chordata	33372.0	0	Carnivora	33372.0	0	Canidae	33372.0	0	Canis	33372.0	0	Canis lupus	33372.0	0
scf7180000053755	2436	0.4241	0	356.0906	no-hit	0.0	0	no-hit	0.0	0	no-hit	0.0	0	no-hit	0.0	0	no-hit	0.0	0	no-hit	0.0	0
scf7180000041749	245849	0.4157	0	63.9751	Eukaryota	91203.0	0	Chordata	91203.0	0	Carnivora	91203.0	0	Canidae	91203.0	0	Canis	91203.0	0	Canis lupus	91203.0	0
scf7180000055001	23009	0.4444	0	159.7283	Eukaryota	91504.0	0	Chordata	91504.0	0	Carnivora	91504.0	0	Canidae	91504.0	0	Canis	91504.0	0	Canis lupus	91504.0	0
scf7180000055904	9475	0.4421	0	267.18	Eukaryota	721.0	0	Chordata	721.0	0	Tetraodontiformes	534.0	1	Tetraodontidae	534.0	1	Takifugu	534.0	1	Takifugu rubripes	534.0	1
scf7180000041651	775806	0.3545	0	60.2738	Eukaryota	40607.0	0	Chordata	40607.0	0	Carnivora	40607.0	0	Canidae	40607.0	0	Canis	37761.0	1	Canis lupus	37761.0	1
scf7180000045225	71091	0.3798	0	65.1103	Eukaryota	115755.0	0	Chordata	115755.0	0	Carnivora	115755.0	0	Canidae	115755.0	0	Canis	115755.0	0	Canis lupus	115755.0	0
scf7180000044823	4329	0.4019	0	24.2546	Eukaryota	1976.0	0	Chordata	1976.0	0	Carnivora	1976.0	0	Canidae	1976.0	0	Canis	1789.0	1	Canis lupus	1789.0	1
scf7180000055484	23654	0.378	0	93.5581	Eukaryota	7404.0	0	Chordata	7404.0	0	Carnivora	7404.0	0	Canidae	7404.0	0	Canis	7404.0	0	Canis lupus	7404.0	0
scf7180000041559	901685	0.4973	0	59.2258	Eukaryota	127122.0	0	Chordata	127122.0	0	Carnivora	127122.0	0	Canidae	127122.0	0	Canis	92206.0	1	Canis lupus	92206.0	1
scf7180000042105	564892	0.4051	0	59.8558	Eukaryota	52809.0	0	Chordata	52809.0	0	Carnivora	52809.0	0	Canidae	52809.0	0	Canis	52809.0	0	Canis lupus	52809.0	0
scf7180000048683	2249	0.4526	0	202.4239	Eukaryota	3780.0	0	Chordata	3780.0	0	Carnivora	2159.0	2	Canidae	2159.0	2	Canis	2159.0	2	Canis lupus	2159.0	2
scf7180000050200	33637	0.6236	0	53.4175	Eukaryota	6211.0	0	Chordata	6211.0	0	Carnivora	6211.0	0	Canidae	6211.0	0	Canis	6211.0	0	Canis lupus	6211.0	0
scf7180000053020	6613	0.453	0	1420.7911	Eukaryota	1566.0	0	Chordata	1566.0	0	Columbiformes	568.0	3	Columbidae	568.0	3	Streptopelia	568.0	3	Streptopelia turtur	568.0	3
scf7180000048597	23193	0.4392	0	175.7002	Eukaryota	4215.0	0	Chordata	3057.0	2	Salmoniformes	3057.0	2	Salmonidae	3057.0	2	Salmo	2667.0	3	Salmo trutta	2667.0	3
scf7180000051643	17246	0.4407	0	54.8848	Eukaryota	450.0	0	Chordata	450.0	0	Tetraodontiformes	278.0	1	Tetraodontidae	278.0	1	Takifugu	278.0	1	Takifugu rubripes	278.0	1
scf7180000053502	1541	0.4588	0	98.616	no-hit	0.0	0	no-hit	0.0	0	no-hit	0.0	0	no-hit	0.0	0	no-hit	0.0	0	no-hit	0.0	0
scf7180000046278	209123	0.3367	0	60.0402	Eukaryota	33998.0	0	Chordata	33998.0	0	Carnivora	33998.0	0	Otariidae	13424.0	3	Zalophus	10068.0	5	Zalophus californianus	10068.0	6
scf7180000047813	5574	0.4433	0	164.8888	no-hit	0.0	0	no-hit	0.0	0	no-hit	0.0	0	no-hit	0.0	0	no-hit	0.0	0	no-hit	0.0	0
scf7180000044037	255617	0.4625	0	56.9942	Eukaryota	26036.0	0	Chordata	26036.0	0	Carnivora	26036.0	0	Canidae	26036.0	0	Canis	15742.0	1	Canis lupus	15742.0	1
scf7180000040985	1499298	0.3958	0	59.3596	Eukaryota	69172.0	0	Chordata	69172.0	0	Carnivora	69172.0	0	Canidae	69172.0	0	Canis	69172.0	0	Canis lupus	69172.0	0
scf7180000044535	12146	0.3198	0	29.2976	Eukaryota	1730.0	0	Chordata	1730.0	0	Carnivora	1730.0	0	Canidae	1730.0	0	Canis	1730.0	0	Canis lupus	1730.0	0
scf7180000042300	691604	0.3785	0	59.7497	Eukaryota	78519.0	0	Chordata	78519.0	0	Carnivora	78519.0	0	Canidae	78519.0	0	Canis	67706.0	1	Canis lupus	67706.0	1
scf7180000042952	340494	0.3646	0	58.758	Eukaryota	94327.0	0	Chordata	94327.0	0	Carnivora	94327.0	0	Canidae	94327.0	0	Canis	94327.0	0	Canis lupus	94327.0	0
scf7180000051922	10337	0.4457	0	252.7163	Eukaryota	43049.0	0	Chordata	33732.0	1	Gadiformes	25896.0	4	Gadidae	25896.0	4	Gadus	25896.0	4	Gadus morhua	25896.0	4
scf7180000049273	3676	0.4483	0	608.7799	no-hit	0.0	0	no-hit	0.0	0	no-hit	0.0	0	no-hit	0.0	0	no-hit	0.0	0	no-hit	0.0	0
scf7180000043448	457023	0.4437	0	60.5873	Eukaryota	79785.0	0	Chordata	79785.0	0	Carnivora	79785.0	0	Canidae	79785.0	0	Canis	79785.0	0	Canis lupus	79785.0	0
scf7180000049221	23108	0.4543	0	311.7706	Eukaryota	11503.0	0	Chordata	11503.0	0	Tetraodontiformes	4798.0	3	Tetraodontidae	4798.0	3	Takifugu	4798.0	3	Takifugu rubripes	4085.0	4
scf7180000051467	14357	0.4089	0	58.9872	Eukaryota	3747.0	0	Chordata	3747.0	0	Carnivora	3747.0	0	Canidae	3747.0	0	Canis	3747.0	0	Canis lupus	3747.0	0
scf7180000041466	305403	0.3483	0	58.4641	Eukaryota	92989.0	0	Chordata	92989.0	0	Carnivora	92989.0	0	Canidae	92989.0	0	Canis	92989.0	0	Canis lupus	92989.0	0
scf7180000045721	48210	0.4428	0	112.1458	Eukaryota	2759.0	0	Chordata	2208.0	1	Kurtiformes	990.0	3	Apogonidae	990.0	3	Sphaeramia	990.0	3	Sphaeramia orbicularis	990.0	3
scf7180000041755	421476	0.5304	0	59.3278	Eukaryota	71000.0	0	Chordata	71000.0	0	Carnivora	71000.0	0	Canidae	71000.0	0	Canis	71000.0	0	Canis lupus	71000.0	0
scf7180000052087	6386	0.4541	0	1521.008	no-hit	0.0	0	no-hit	0.0	0	no-hit	0.0	0	no-hit	0.0	0	no-hit	0.0	0	no-hit	0.0	0
scf7180000043662	569933	0.3949	0	58.826	Eukaryota	56012.0	0	Chordata	56012.0	0	Carnivora	56012.0	0	Canidae	56012.0	0	Canis	56012.0	0	Canis lupus	56012.0	0
scf7180000049360	11595	0.4423	0	60.1789	Eukaryota	20686.0	0	Chordata	12829.0	1	Strigeidida	7857.0	5	Schistosomatidae	7857.0	5	Schistosoma	7857.0	5	Schistosoma mansoni	7857.0	6
scf7180000045146	28161	0.4102	0	54.2179	Eukaryota	85942.0	0	Chordata	85942.0	0	Carnivora	85942.0	0	Canidae	85942.0	0	Canis	85942.0	0	Canis lupus	85942.0	0
scf7180000053004	5557	0.4555	0	2518.5937	Eukaryota	3916.0	0	Platyhelminthes	2167.0	3	Polystomatidea	2167.0	3	Polystomatidae	2167.0	3	Protopolystoma	2167.0	3	Protopolystoma xenopodis	2167.0	3
scf7180000053134	7582	0.4401	0	153.5327	Eukaryota	259.0	0	Platyhelminthes	259.0	0	Polystomatidea	259.0	0	Polystomatidae	259.0	0	Protopolystoma	259.0	0	Protopolystoma xenopodis	259.0	0
scf7180000055945	18205	0.4455	0	769.1833	Eukaryota	3259.0	0	Platyhelminthes	1756.0	2	Polystomatidea	1756.0	2	Polystomatidae	1756.0	2	Protopolystoma	1756.0	2	Protopolystoma xenopodis	1756.0	2
scf7180000045569	195911	0.5461	0	95.5587	Eukaryota	91453.0	0	Chordata	91453.0	0	Carnivora	91453.0	0	Canidae	91453.0	0	Canis	91453.0	0	Canis lupus	91453.0	0
scf7180000043754	99887	0.4153	0	57.9523	Eukaryota	90246.0	0	Chordata	90246.0	0	Carnivora	90246.0	0	Canidae	90246.0	0	Canis	90246.0	0	Canis lupus	90246.0	0
scf7180000045676	187700	0.3835	0	60.3638	Eukaryota	47296.0	0	Chordata	47296.0	0	Carnivora	47296.0	0	Canidae	35454.0	1	Canis	30432.0	3	Canis lupus	30432.0	3
scf7180000046509	28896	0.4001	0	52.7847	Eukaryota	8574.0	0	Chordata	8574.0	0	Carnivora	8574.0	0	Canidae	8574.0	0	Canis	7698.0	1	Canis lupus	7698.0	1
scf7180000048275	43116	0.3647	0	55.4584	Eukaryota	78121.0	0	Chordata	78121.0	0	Carnivora	78121.0	0	Canidae	78121.0	0	Canis	78121.0	0	Canis lupus	78121.0	0
scf7180000046209	29347	0.434	0	269.8386	Eukaryota	42598.0	0	Chordata	42598.0	0	Carnivora	42598.0	0	Canidae	42598.0	0	Canis	42598.0	0	Canis lupus	42598.0	0
scf7180000048647	59314	0.3871	0	58.1316	Eukaryota	21712.0	0	Chordata	21712.0	0	Carnivora	21712.0	0	Canidae	21712.0	0	Canis	21712.0	0	Canis lupus	21712.0	0
scf7180000053866	2973	0.4649	0	109.1463	Eukaryota	3753.0	0	Chordata	3570.0	1	Salmoniformes	3182.0	2	Salmonidae	3182.0	2	Coregonus	1772.0	3	Coregonus sp. 'balchen'	1772.0	3
scf7180000043711	129523	0.369	0	59.6908	Eukaryota	84624.0	0	Chordata	84624.0	0	Carnivora	84624.0	0	Canidae	84624.0	0	Canis	84624.0	0	Canis lupus	84624.0	0
scf7180000047879	2416	0.4507	0	113.1991	no-hit	0.0	0	no-hit	0.0	0	no-hit	0.0	0	no-hit	0.0	0	no-hit	0.0	0	no-hit	0.0	0
scf7180000040478	5068101	0.4467	0	59.495	Eukaryota	93719.0	0	Chordata	93719.0	0	Carnivora	93719.0	0	Canidae	93719.0	0	Canis	63737.0	1	Canis lupus	63737.0	1
scf7180000049135	24420	0.4438	0	57.947	Eukaryota	38135.0	0	Chordata	31807.0	2	Gadiformes	25083.0	6	Gadidae	25083.0	6	Gadus	25083.0	6	Gadus morhua	25083.0	6
scf7180000043853	472812	0.3851	0	59.9725	Eukaryota	58800.0	0	Chordata	58800.0	0	Carnivora	58800.0	0	Canidae	58800.0	0	Canis	58800.0	0	Canis lupus	58800.0	0
scf7180000054208	25901	0.4787	0	204.419	Eukaryota	12176.0	0	Chordata	12176.0	0	Carnivora	10220.0	1	Canidae	10220.0	1	Canis	8809.0	2	Canis lupus	7933.0	3
scf7180000056140	2061	0.4386	0	113.6954	no-hit	0.0	0	no-hit	0.0	0	no-hit	0.0	0	no-hit	0.0	0	no-hit	0.0	0	no-hit	0.0	0
scf7180000054373	380480	0.3459	0	59.8464	Eukaryota	93635.0	0	Chordata	93635.0	0	Carnivora	93635.0	0	Canidae	93635.0	0	Canis	93635.0	0	Canis lupus	93635.0	0
scf7180000043805	38143	0.475	0	131.9476	Eukaryota	9993.0	0	Chordata	9993.0	0	Carnivora	9993.0	0	Canidae	9040.0	1	Canis	6502.0	2	Canis lupus	6502.0	2
scf7180000041289	123149	0.3764	0	57.1618	Eukaryota	91854.0	0	Chordata	91854.0	0	Carnivora	91854.0	0	Canidae	91854.0	0	Canis	91854.0	0	Canis lupus	91854.0	0
scf7180000044008	92342	0.4192	0	57.0965	Eukaryota	45633.0	0	Chordata	45633.0	0	Carnivora	45633.0	0	Canidae	45633.0	0	Canis	30132.0	1	Canis lupus	30132.0	1
scf7180000055255	22183	0.5161	0	620.1278	Eukaryota	15562.0	0	Chordata	15562.0	0	Carnivora	15562.0	0	Canidae	15562.0	0	Canis	15562.0	0	Canis lupus	15562.0	0
scf7180000051200	17637	0.4158	0	57.3049	Eukaryota	9600.0	0	Chordata	9600.0	0	Carnivora	9600.0	0	Canidae	9600.0	0	Canis	9600.0	0	Canis lupus	9600.0	0
scf7180000053124	4122	0.4391	0	159.1484	no-hit	0.0	0	no-hit	0.0	0	no-hit	0.0	0	no-hit	0.0	0	no-hit	0.0	0	no-hit	0.0	0
scf7180000054943	23933	0.4129	0	557.697	Eukaryota	92407.0	0	Chordata	92407.0	0	Carnivora	92407.0	0	Canidae	92407.0	0	Canis	92407.0	0	Canis lupus	92407.0	0
scf7180000045080	281458	0.3811	0	61.4382	Eukaryota	91057.0	0	Chordata	91057.0	0	Carnivora	91057.0	0	Canidae	91057.0	0	Canis	91057.0	0	Canis lupus	91057.0	0
scf7180000054497	51318	0.5207	0	323.9161	Eukaryota	33345.0	0	Chordata	33345.0	0	Carnivora	33345.0	0	Canidae	33345.0	0	Canis	33345.0	0	Canis lupus	33345.0	0
scf7180000047282	84685	0.4266	0	59.1555	Eukaryota	35906.0	0	Chordata	35906.0	0	Carnivora	35906.0	0	Otariidae	23456.0	1	Zalophus	10068.0	4	Zalophus californianus	10068.0	4
scf7180000049908	6958	0.4477	0	1137.2477	Eukaryota	496.0	0	Streptophyta	496.0	0	Fabales	496.0	0	Fabaceae	496.0	0	Cicer	496.0	0	Cicer arietinum	496.0	0
scf7180000048457	80510	0.3269	0	59.4225	Eukaryota	28841.0	0	Chordata	28841.0	0	Carnivora	28841.0	0	Canidae	28841.0	0	Canis	25947.0	1	Canis lupus	25947.0	1
scf7180000049844	3069	0.4529	0	501.528	Eukaryota	217.0	0	Streptophyta	217.0	0	Fabales	217.0	0	Fabaceae	217.0	0	Cicer	217.0	0	Cicer arietinum	217.0	0
scf7180000046057	4224	0.5509	0	26.798	Eukaryota	20425.0	0	Chordata	20425.0	0	Carnivora	20425.0	0	Canidae	12801.0	2	Canis	9920.0	4	Canis lupus	9920.0	5
scf7180000049692	8734	0.4452	0	1068.5652	Eukaryota	174.0	0	Euglenozoa	174.0	0	Kinetoplastida	174.0	0	Trypanosomatidae	174.0	0	Leishmania	174.0	0	Leishmania donovani	174.0	0
scf7180000041672	1004026	0.4257	0	60.2512	Eukaryota	77566.0	0	Chordata	77566.0	0	Carnivora	77566.0	0	Canidae	77566.0	0	Canis	49998.0	1	Canis lupus	49998.0	1
scf7180000041999	964404	0.352	100	59.335	Eukaryota	92776.0	0	Chordata	92776.0	0	Carnivora	92776.0	0	Canidae	92776.0	0	Canis	92776.0	0	Canis lupus	92776.0	0
scf7180000040844	1626617	0.4092	0	57.6663	Eukaryota	56980.0	0	Chordata	56980.0	0	Carnivora	56980.0	0	Canidae	56980.0	0	Canis	56980.0	0	Canis lupus	56980.0	0
scf7180000042442	357401	0.4706	0	57.3242	Eukaryota	43531.0	0	Chordata	43531.0	0	Carnivora	43531.0	0	Canidae	43531.0	0	Canis	43531.0	0	Canis lupus	43531.0	0
scf7180000044743	264677	0.3671	0	60.9122	Eukaryota	32750.0	0	Chordata	32750.0	0	Carnivora	32750.0	0	Canidae	32750.0	0	Canis	32750.0	0	Canis lupus	32750.0	0
scf7180000050071	12489	0.4493	0	1607.2092	Eukaryota	1570.0	0	Chordata	1011.0	1	Kurtiformes	756.0	2	Apogonidae	756.0	2	Sphaeramia	756.0	2	Sphaeramia orbicularis	756.0	2
scf7180000056441	416819	0.3883	0	59.9164	Eukaryota	79905.0	0	Chordata	79905.0	0	Carnivora	79905.0	0	Canidae	79905.0	0	Canis	79905.0	0	Canis lupus	79905.0	0
scf7180000048932	5330	0.4548	0	71.4013	no-hit	0.0	0	no-hit	0.0	0	no-hit	0.0	0	no-hit	0.0	0	no-hit	0.0	0	no-hit	0.0	0
scf7180000055134	15228	0.4332	0	178.7589	no-hit	0.0	0	no-hit	0.0	0	no-hit	0.0	0	no-hit	0.0	0	no-hit	0.0	0	no-hit	0.0	0
scf7180000050109	21476	0.4386	0	63.8792	Eukaryota	2345.0	0	Chordata	1925.0	1	Kurtiformes	1623.0	2	Apogonidae	1623.0	2	Sphaeramia	1623.0	2	Sphaeramia orbicularis	1623.0	2
scf7180000043479	24360	0.355	0	47.1351	Eukaryota	35093.0	0	Chordata	35093.0	0	Carnivora	35093.0	0	Canidae	35093.0	0	Canis	35093.0	0	Canis lupus	35093.0	0
scf7180000051919	3852	0.4499	0	381.2072	Eukaryota	3084.0	0	Platyhelminthes	1658.0	2	Polystomatidea	1658.0	2	Polystomatidae	1658.0	2	Protopolystoma	1658.0	2	Protopolystoma xenopodis	1658.0	2
scf7180000042569	606206	0.3368	0	59.5778	Eukaryota	59302.0	0	Chordata	59302.0	0	Carnivora	59302.0	0	Canidae	59302.0	0	Canis	59302.0	0	Canis lupus	59302.0	0
scf7180000048584	22693	0.4402	0	205.3604	Eukaryota	7881.0	0	Chordata	5901.0	1	Carnivora	4395.0	2	Canidae	4395.0	2	Canis	4395.0	2	Canis lupus	4395.0	2
scf7180000045313	58644	0.4377	0	111.5325	Eukaryota	15956.0	0	Chordata	10266.0	2	Gadiformes	4407.0	7	Gadidae	4407.0	7	Gadus	4407.0	7	Gadus morhua	4407.0	7
scf7180000050905	16119	0.5184	0	224.6618	Eukaryota	15787.0	0	Chordata	15787.0	0	Carnivora	15787.0	0	Canidae	15787.0	0	Canis	15787.0	0	Canis lupus	15787.0	0
scf7180000047068	28305	0.4361	0	266.6396	Eukaryota	24109.0	0	Chordata	19421.0	2	Gadiformes	6791.0	6	Gadidae	6791.0	6	Gadus	6791.0	7	Gadus morhua	6791.0	7
scf7180000045877	164727	0.4538	0	62.2296	Eukaryota	78860.0	0	Chordata	78860.0	0	Carnivora	78860.0	0	Canidae	78860.0	0	Canis	70175.0	1	Canis lupus	70175.0	1
scf7180000052853	13397	0.4353	0	52.4631	Eukaryota	12717.0	0	Chordata	9674.0	2	Chordata-undef	3446.0	7	Ambassidae	3446.0	7	Parambassis	3446.0	7	Parambassis ranga	3446.0	7
scf7180000045771	195523	0.3787	0	58.5967	Eukaryota	32247.0	0	Chordata	32247.0	0	Carnivora	32247.0	0	Canidae	32247.0	0	Canis	29028.0	1	Canis lupus	29028.0	1
scf7180000048016	15123	0.4376	0	446.2662	no-hit	0.0	0	no-hit	0.0	0	no-hit	0.0	0	no-hit	0.0	0	no-hit	0.0	0	no-hit	0.0	0
scf7180000043549	1034091	0.4595	0	58.5415	Eukaryota	87907.0	0	Chordata	87907.0	0	Carnivora	87907.0	0	Canidae	87907.0	0	Canis	79216.0	1	Canis lupus	79216.0	1
scf7180000043749	418902	0.3896	0	58.5655	Eukaryota	66733.0	0	Chordata	66733.0	0	Carnivora	40477.0	1	Suidae	26256.0	3	Sus	26256.0	4	Sus scrofa	26256.0	4
scf7180000049352	17566	0.4411	0	344.2489	Eukaryota	1343.0	0	Chordata	715.0	2	Fabales	487.0	4	Fabaceae	487.0	4	Cicer	487.0	4	Cicer arietinum	487.0	4
scf7180000040703	1867329	0.3987	0	58.7843	Eukaryota	50612.0	0	Chordata	50612.0	0	Carnivora	50612.0	0	Canidae	50612.0	0	Canis	50612.0	0	Canis lupus	50612.0	0
scf7180000049452	4769	0.455	0	487.9974	Eukaryota	1915.0	0	Platyhelminthes	1005.0	2	Polystomatidea	1005.0	2	Polystomatidae	1005.0	2	Protopolystoma	1005.0	2	Protopolystoma xenopodis	1005.0	2
scf7180000045135	238825	0.3974	0	59.8657	Eukaryota	105520.0	0	Chordata	105520.0	0	Carnivora	105520.0	0	Canidae	67109.0	3	Vulpes	45713.0	4	Vulpes vulpes	45713.0	4
scf7180000042037	153018	0.3624	0	59.6977	Eukaryota	42724.0	0	Chordata	42724.0	0	Carnivora	42724.0	0	Canidae	42724.0	0	Canis	42724.0	0	Canis lupus	42724.0	0
scf7180000049204	46063	0.4447	0	79.4076	no-hit	0.0	0	no-hit	0.0	0	no-hit	0.0	0	no-hit	0.0	0	no-hit	0.0	0	no-hit	0.0	0
scf7180000050347	30360	0.4492	0	56.8091	Eukaryota	81972.0	0	Chordata	81972.0	0	Carnivora	81972.0	0	Canidae	81972.0	0	Canis	81972.0	0	Canis lupus	81972.0	0
scf7180000043051	486134	0.4043	0	59.1833	Eukaryota	46543.0	0	Chordata	46543.0	0	Carnivora	46543.0	0	Canidae	46543.0	0	Canis	40421.0	1	Canis lupus	40421.0	1
scf7180000045576	30878	0.4907	0	47.5342	Eukaryota	13648.0	0	Chordata	13648.0	0	Carnivora	10679.0	1	Canidae	8572.0	3	Canis	4748.0	4	Canis lupus	4748.0	4
scf7180000048512	10190	0.4393	0	64.4161	Eukaryota	11326.0	0	Chordata	11326.0	0	Carnivora	11326.0	0	Otariidae	4288.0	3	Canis	2585.0	5	Canis lupus	2585.0	5
scf7180000046196	157561	0.3411	0	59.5594	Eukaryota	56063.0	0	Chordata	56063.0	0	Carnivora	56063.0	0	Canidae	56063.0	0	Canis	56063.0	0	Canis lupus	56063.0	0
scf7180000050683	35938	0.3562	0	68.1608	Eukaryota	67991.0	0	Chordata	67991.0	0	Carnivora	67991.0	0	Canidae	67991.0	0	Canis	67991.0	0	Canis lupus	67991.0	0
scf7180000048108	38530	0.4428	0	149.4751	Eukaryota	39640.0	0	Chordata	31011.0	2	Gadiformes	23263.0	5	Gadidae	23263.0	5	Gadus	23263.0	5	Gadus morhua	23263.0	5
scf7180000045925	157924	0.3778	0	60.6064	Eukaryota	28629.0	0	Chordata	28629.0	0	Carnivora	28629.0	0	Canidae	28629.0	0	Canis	28629.0	0	Canis lupus	28629.0	0
scf7180000050357	24374	0.4458	0	61.1738	Eukaryota	55505.0	0	Chordata	55505.0	0	Carnivora	55505.0	0	Canidae	47527.0	1	Canis	31643.0	4	Canis lupus	31643.0	4
scf7180000051892	6829	0.4561	0	589.7487	Eukaryota	2218.0	0	Platyhelminthes	1232.0	2	Polystomatidea	1232.0	2	Polystomatidae	1232.0	2	Protopolystoma	1232.0	2	Protopolystoma xenopodis	1232.0	2
scf7180000051109	17868	0.4345	0	121.1671	Eukaryota	2490.0	0	Chordata	1498.0	1	Polystomatidea	853.0	4	Polystomatidae	853.0	4	Protopolystoma	853.0	5	Protopolystoma xenopodis	853.0	5
scf7180000042323	576182	0.464	0	58.7126	Eukaryota	44780.0	0	Chordata	44780.0	0	Carnivora	44780.0	0	Canidae	44780.0	0	Canis	40384.0	1	Canis lupus	40384.0	1
scf7180000044323	75369	0.3907	0	68.1627	Eukaryota	77604.0	0	Chordata	77604.0	0	Carnivora	77604.0	0	Canidae	77604.0	0	Canis	77604.0	0	Canis lupus	77604.0	0
scf7180000042459	25620	0.3955	0	55.2836	Eukaryota	92258.0	0	Chordata	92258.0	0	Carnivora	92258.0	0	Canidae	92258.0	0	Canis	92258.0	0	Canis lupus	92258.0	0
scf7180000041334	1475675	0.3669	100	59.2589	Eukaryota	124104.0	0	Chordata	124104.0	0	Carnivora	124104.0	0	Canidae	124104.0	0	Canis	124104.0	0	Canis lupus	124104.0	0
scf7180000041658	368001	0.4092	0	59.7361	Eukaryota	62774.0	0	Chordata	62774.0	0	Carnivora	62774.0	0	Canidae	62774.0	0	Canis	62774.0	0	Canis lupus	62774.0	0
scf7180000052594	3751	0.4441	0	777.116	no-hit	0.0	0	no-hit	0.0	0	no-hit	0.0	0	no-hit	0.0	0	no-hit	0.0	0	no-hit	0.0	0
scf7180000041155	1324525	0.3948	0	60.9642	Eukaryota	109648.0	0	Chordata	109648.0	0	Carnivora	109648.0	0	Canidae	109648.0	0	Canis	109648.0	0	Canis lupus	109648.0	0
scf7180000042224	201762	0.3618	0	59.0889	Eukaryota	55444.0	0	Chordata	55444.0	0	Carnivora	55444.0	0	Canidae	55444.0	0	Canis	55444.0	0	Canis lupus	55444.0	0
scf7180000048380	10842	0.4535	0	804.1029	Eukaryota	182.0	0	Streptophyta	182.0	0	Fabales	182.0	0	Fabaceae	182.0	0	Cicer	182.0	0	Cicer arietinum	182.0	0
scf7180000056444	273100	0.4286	0	60.7082	Eukaryota	56554.0	0	Chordata	56554.0	0	Carnivora	56554.0	0	Canidae	56554.0	0	Canis	56554.0	0	Canis lupus	56554.0	0
scf7180000052350	5386	0.4543	0	776.4507	Eukaryota	2542.0	0	Chordata	2542.0	0	Carnivora	2542.0	0	Canidae	2542.0	0	Canis	2542.0	0	Canis lupus	2542.0	0
scf7180000056589	323361	0.3603	0	60.7941	Eukaryota	93549.0	0	Chordata	93549.0	0	Carnivora	93549.0	0	Canidae	93549.0	0	Canis	65510.0	1	Canis lupus	65510.0	1
scf7180000045748	162652	0.3847	0	60.7749	Eukaryota	11719.0	0	Chordata	11719.0	0	Carnivora	11719.0	0	Canidae	11719.0	0	Canis	11719.0	0	Canis lupus	11719.0	0
scf7180000042198	78109	0.4136	0	162.4959	Eukaryota	133990.0	0	Chordata	133990.0	0	Carnivora	133990.0	0	Canidae	133990.0	0	Canis	133990.0	0	Canis lupus	133990.0	0
scf7180000048766	41639	0.395	0	61.3502	Eukaryota	65647.0	0	Chordata	65647.0	0	Carnivora	65647.0	0	Canidae	22876.0	3	Leptonychotes	18294.0	6	Leptonychotes weddellii	18294.0	6
scf7180000056407	495417	0.3561	0	59.9282	Eukaryota	91534.0	0	Chordata	91534.0	0	Carnivora	91534.0	0	Canidae	91534.0	0	Canis	91534.0	0	Canis lupus	91534.0	0
scf7180000046133	133031	0.5429	0	59.0587	Eukaryota	16490.0	0	Chordata	16490.0	0	Carnivora	16490.0	0	Canidae	16490.0	0	Canis	9810.0	1	Canis lupus	9810.0	1
scf7180000041567	1319221	0.4908	100	58.8536	Eukaryota	156544.0	0	Chordata	156544.0	0	Carnivora	156544.0	0	Canidae	156544.0	0	Canis	156544.0	0	Canis lupus	156544.0	0
scf7180000052872	8637	0.4387	0	105.5394	Eukaryota	7597.0	0	Chordata	7597.0	0	Carnivora	7597.0	0	Canidae	7597.0	0	Canis	7597.0	0	Canis lupus	7597.0	0
scf7180000041276	1539792	0.3652	100	59.1808	Eukaryota	92924.0	0	Chordata	92924.0	0	Carnivora	92924.0	0	Canidae	92924.0	0	Canis	92924.0	0	Canis lupus	92924.0	0
scf7180000050136	37525	0.4551	0	59.6022	Eukaryota	33655.0	1	Chordata	30986.0	2	Tetraodontiformes	11263.0	5	Tetraodontidae	11263.0	5	Takifugu	11263.0	5	Takifugu rubripes	11263.0	5
scf7180000048827	24821	0.4525	0	1111.8892	Eukaryota	3551.0	0	Platyhelminthes	1937.0	3	Polystomatidea	1937.0	3	Polystomatidae	1937.0	3	Protopolystoma	1937.0	3	Protopolystoma xenopodis	1937.0	3
scf7180000052887	5966	0.4309	0	48.9817	Eukaryota	10000.0	0	Chordata	9663.0	1	Kurtiformes	4016.0	3	Apogonidae	4016.0	3	Sphaeramia	4016.0	4	Sphaeramia orbicularis	4016.0	4
scf7180000051248	4702	0.4462	0	811.5072	no-hit	0.0	0	no-hit	0.0	0	no-hit	0.0	0	no-hit	0.0	0	no-hit	0.0	0	no-hit	0.0	0
scf7180000044802	297793	0.408	0	61.0434	Eukaryota	89004.0	0	Chordata	89004.0	0	Carnivora	89004.0	0	Canidae	89004.0	0	Canis	89004.0	0	Canis lupus	89004.0	0
scf7180000056191	1499030	0.4659	0	58.4614	Eukaryota	86669.0	0	Chordata	86669.0	0	Carnivora	86669.0	0	Canidae	86669.0	0	Canis	78111.0	1	Canis lupus	78111.0	1
scf7180000043685	746305	0.462	0	57.9829	Eukaryota	87141.0	0	Chordata	87141.0	0	Carnivora	87141.0	0	Canidae	87141.0	0	Canis	87141.0	0	Canis lupus	87141.0	0
scf7180000043085	102018	0.3728	0	58.8984	Eukaryota	26165.0	0	Chordata	26165.0	0	Carnivora	26165.0	0	Felidae	12933.0	3	Leptonychotes	5253.0	7	Leptonychotes weddellii	5253.0	8
scf7180000051720	8922	0.4378	0	128.432	no-hit	0.0	0	no-hit	0.0	0	no-hit	0.0	0	no-hit	0.0	0	no-hit	0.0	0	no-hit	0.0	0
scf7180000051981	8560	0.4464	0	169.8409	Eukaryota	13272.0	0	Platyhelminthes	6738.0	3	Strigeidida	6738.0	7	Schistosomatidae	6738.0	7	Schistosoma	6738.0	7	Schistosoma mansoni	6738.0	7
scf7180000054864	27869	0.3992	0	330.8398	Eukaryota	69879.0	0	Chordata	69879.0	0	Carnivora	69879.0	0	Canidae	69879.0	0	Canis	69879.0	0	Canis lupus	69879.0	0
scf7180000045611	90845	0.437	0	200.4262	Eukaryota	4061.0	0	Platyhelminthes	2271.0	1	Polystomatidea	2271.0	2	Polystomatidae	2271.0	2	Protopolystoma	2271.0	2	Protopolystoma xenopodis	2271.0	2
scf7180000049314	652551	0.3978	0	60.9297	Eukaryota	107629.0	0	Chordata	107629.0	0	Carnivora	107629.0	0	Canidae	107629.0	0	Canis	92597.0	1	Canis lupus	92597.0	1
scf7180000052166	5885	0.4464	0	1158.6002	no-hit	0.0	0	no-hit	0.0	0	no-hit	0.0	0	no-hit	0.0	0	no-hit	0.0	0	no-hit	0.0	0
scf7180000050112	14918	0.4541	0	3173.7595	Eukaryota	3829.0	0	Chordata	2720.0	1	Gonorynchiformes	1146.0	3	Chanidae	1146.0	3	Chanos	1146.0	3	Chanos chanos	1146.0	3
scf7180000048399	60040	0.4996	0	224.9343	Eukaryota	8445.0	0	Chordata	8445.0	0	Carnivora	8445.0	0	Canidae	8445.0	0	Canis	6352.0	1	Canis lupus	5231.0	2
scf7180000041943	797359	0.3744	0	104.7683	Eukaryota	91165.0	0	Chordata	91165.0	0	Carnivora	91165.0	0	Canidae	91165.0	0	Canis	91165.0	0	Canis lupus	91165.0	0
scf7180000046746	87302	0.3962	0	59.2079	Eukaryota	7910.0	0	Chordata	7910.0	0	Carnivora	5911.0	1	Canidae	5911.0	1	Canis	5911.0	2	Canis lupus	5911.0	2
scf7180000041854	282739	0.373	0	59.3743	Eukaryota	55566.0	0	Chordata	55566.0	0	Carnivora	55566.0	0	Canidae	55566.0	0	Canis	55566.0	0	Canis lupus	55566.0	0
scf7180000043859	374821	0.4273	100	58.8638	Eukaryota	92983.0	0	Chordata	92983.0	0	Carnivora	92983.0	0	Canidae	92983.0	0	Canis	92983.0	0	Canis lupus	92983.0	0
scf7180000045545	29034	0.375	100	39.45	Eukaryota	78531.0	0	Chordata	78531.0	0	Carnivora	78531.0	0	Canidae	78531.0	0	Canis	78531.0	0	Canis lupus	78531.0	0
scf7180000055448	28682	0.4422	0	134.0646	Eukaryota	25790.0	0	Chordata	22444.0	3	Gadiformes	18473.0	6	Gadidae	18473.0	6	Gadus	18473.0	6	Gadus morhua	18473.0	6
scf7180000041484	529407	0.3647	0	59.9467	Eukaryota	90810.0	0	Chordata	90810.0	0	Carnivora	90810.0	0	Canidae	90810.0	0	Canis	90810.0	0	Canis lupus	90810.0	0
scf7180000050956	6227	0.4468	0	995.4895	no-hit	0.0	0	no-hit	0.0	0	no-hit	0.0	0	no-hit	0.0	0	no-hit	0.0	0	no-hit	0.0	0
scf7180000041018	1423377	0.3962	0	59.558	Eukaryota	59439.0	0	Chordata	59439.0	0	Carnivora	59439.0	0	Canidae	59439.0	0	Canis	59439.0	0	Canis lupus	59439.0	0
scf7180000040669	2039414	0.3981	0	60.0049	Eukaryota	93153.0	0	Chordata	93153.0	0	Carnivora	93153.0	0	Canidae	93153.0	0	Canis	93153.0	0	Canis lupus	93153.0	0
scf7180000041722	319934	0.4148	0	59.3895	Eukaryota	59342.0	0	Chordata	59342.0	0	Carnivora	59342.0	0	Canidae	59342.0	0	Canis	59342.0	0	Canis lupus	59342.0	0
scf7180000044947	160008	0.351	0	58.834	Eukaryota	89458.0	0	Chordata	89458.0	0	Carnivora	89458.0	0	Canidae	89458.0	0	Canis	89458.0	0	Canis lupus	89458.0	0
scf7180000041617	458824	0.4285	0	62.2029	Eukaryota	102917.0	0	Chordata	102917.0	0	Carnivora	102917.0	0	Canidae	102917.0	0	Canis	102917.0	0	Canis lupus	102917.0	0
scf7180000041923	589352	0.3466	0	58.9368	Eukaryota	89656.0	0	Chordata	89656.0	0	Carnivora	89656.0	0	Canidae	89656.0	0	Canis	89656.0	0	Canis lupus	89656.0	0
scf7180000054592	142259	0.3954	0	93.6652	Eukaryota	67025.0	0	Chordata	67025.0	0	Carnivora	67025.0	0	Canidae	67025.0	0	Canis	67025.0	0	Canis lupus	67025.0	0
scf7180000049470	3227	0.4465	0	491.5274	no-hit	0.0	0	no-hit	0.0	0	no-hit	0.0	0	no-hit	0.0	0	no-hit	0.0	0	no-hit	0.0	0
scf7180000046756	40672	0.4342	0	227.4124	Eukaryota	803.0	0	Platyhelminthes	803.0	0	Polystomatidea	803.0	0	Polystomatidae	803.0	0	Protopolystoma	803.0	0	Protopolystoma xenopodis	803.0	0
scf7180000044492	319372	0.4621	0	59.0801	Eukaryota	92712.0	0	Chordata	92712.0	0	Carnivora	92712.0	0	Canidae	92712.0	0	Canis	92712.0	0	Canis lupus	92712.0	0
scf7180000046930	121799	0.3575	0	57.712	Eukaryota	37527.0	0	Chordata	37527.0	0	Carnivora	37527.0	0	Canidae	37527.0	0	Canis	37527.0	0	Canis lupus	37527.0	0
scf7180000045052	16888	0.4447	0	112.8978	no-hit	0.0	0	no-hit	0.0	0	no-hit	0.0	0	no-hit	0.0	0	no-hit	0.0	0	no-hit	0.0	0
scf7180000042477	340639	0.4111	0	63.9738	Eukaryota	91845.0	0	Chordata	91845.0	0	Carnivora	91845.0	0	Canidae	91845.0	0	Canis	91845.0	0	Canis lupus	91845.0	0
scf7180000048004	4563	0.613	0	26.1187	no-hit	0.0	0	no-hit	0.0	0	no-hit	0.0	0	no-hit	0.0	0	no-hit	0.0	0	no-hit	0.0	0
scf7180000042166	122708	0.4409	0	59.3977	Eukaryota	55600.0	0	Chordata	55600.0	0	Carnivora	55600.0	0	Canidae	55600.0	0	Canis	35770.0	1	Canis lupus	35770.0	1
scf7180000056377	204226	0.4373	0	58.7181	Eukaryota	13991.0	0	Chordata	13991.0	0	Carnivora	13991.0	0	Canidae	13991.0	0	Canis	13991.0	0	Canis lupus	13991.0	0
scf7180000047441	24883	0.4355	0	217.0279	Eukaryota	440.0	0	Chordata	440.0	0	Tetraodontiformes	440.0	0	Tetraodontidae	440.0	0	Takifugu	440.0	0	Takifugu rubripes	440.0	0
scf7180000042519	326269	0.3621	0	58.7827	Eukaryota	85925.0	0	Chordata	85925.0	0	Carnivora	85925.0	0	Canidae	85925.0	0	Canis	85925.0	0	Canis lupus	85925.0	0
scf7180000052571	3321	0.4399	0	232.4019	Eukaryota	2481.0	0	Platyhelminthes	1193.0	3	Polystomatidea	1193.0	3	Polystomatidae	1193.0	3	Protopolystoma	1193.0	3	Protopolystoma xenopodis	1193.0	3
scf7180000047135	6305	0.453	0	43.0464	Eukaryota	8950.0	0	Chordata	8950.0	0	Carnivora	8950.0	0	Canidae	8950.0	0	Canis	5456.0	1	Canis lupus	5456.0	1
scf7180000052131	7881	0.4392	0	54.0346	Eukaryota	1117.0	0	Platyhelminthes	869.0	1	Polystomatidea	869.0	1	Polystomatidae	869.0	1	Protopolystoma	869.0	1	Protopolystoma xenopodis	869.0	1
scf7180000047693	53439	0.3937	0	60.812	Eukaryota	90079.0	0	Chordata	90079.0	0	Carnivora	90079.0	0	Canidae	90079.0	0	Canis	90079.0	0	Canis lupus	90079.0	0
scf7180000043880	466360	0.3591	0	59.7643	Eukaryota	62676.0	0	Chordata	62676.0	0	Carnivora	62676.0	0	Canidae	45060.0	3	Canis	45060.0	3	Canis lupus	45060.0	3
scf7180000042437	636538	0.4401	0	60.936	Eukaryota	45325.0	1	Chordata	45325.0	1	Carnivora	31744.0	3	Canidae	26456.0	4	Canis	20343.0	5	Canis lupus	20343.0	5
scf7180000046690	126662	0.3885	0	58.9878	Eukaryota	59585.0	0	Chordata	59585.0	0	Carnivora	47946.0	1	Canidae	25834.0	4	Canis	20262.0	5	Canis lupus	20262.0	6
scf7180000044388	456222	0.4343	0	58.8893	Eukaryota	37802.0	0	Chordata	37802.0	0	Carnivora	37802.0	0	Canidae	37802.0	0	Canis	37802.0	0	Canis lupus	37802.0	0
scf7180000052271	2080	0.4361	0	539.2017	Eukaryota	351.0	0	Platyhelminthes	351.0	0	Polystomatidea	351.0	0	Polystomatidae	351.0	0	Protopolystoma	351.0	0	Protopolystoma xenopodis	351.0	0
scf7180000041291	9438	0.4339	0	39.1099	Eukaryota	30261.0	0	Chordata	30261.0	0	Carnivora	30261.0	0	Canidae	30261.0	0	Canis	30261.0	0	Canis lupus	30261.0	0
scf7180000042313	289797	0.3996	0	58.6201	Eukaryota	16956.0	1	Chordata	16956.0	1	Primates	7747.0	3	Hominidae	7747.0	3	Homo	5283.0	7	Homo sapiens	5283.0	7
scf7180000054726	24183	0.4459	0	252.6158	Eukaryota	19647.0	0	Chordata	19647.0	0	Carnivora	19647.0	0	Canidae	11177.0	1	Canis	9040.0	3	Canis lupus	9040.0	3
scf7180000042601	260018	0.3933	0	60.5615	Eukaryota	31966.0	0	Chordata	31966.0	0	Carnivora	31966.0	0	Canidae	17999.0	4	Canis	10633.0	6	Canis lupus	10633.0	6
scf7180000045558	157213	0.6387	0	52.8462	Eukaryota	22673.0	0	Chordata	22673.0	0	Carnivora	22673.0	0	Canidae	22673.0	0	Canis	12812.0	1	Canis lupus	12812.0	1
scf7180000056457	303913	0.5602	0	55.2843	Eukaryota	16461.0	0	Chordata	16461.0	0	Carnivora	16461.0	0	Canidae	16461.0	0	Canis	16461.0	0	Canis lupus	16461.0	0
scf7180000049424	4243	0.4476	0	197.356	no-hit	0.0	0	no-hit	0.0	0	no-hit	0.0	0	no-hit	0.0	0	no-hit	0.0	0	no-hit	0.0	0
scf7180000052343	10182	0.5173	0	393.2149	Eukaryota	15759.0	0	Chordata	15759.0	0	Carnivora	15759.0	0	Canidae	15759.0	0	Canis	15759.0	0	Canis lupus	15759.0	0
scf7180000042736	68115	0.4118	0	60.0643	Eukaryota	87410.0	0	Chordata	87410.0	0	Carnivora	87410.0	0	Canidae	87410.0	0	Canis	87410.0	0	Canis lupus	87410.0	0
scf7180000045503	214126	0.3702	0	60.9366	Eukaryota	54483.0	0	Chordata	54483.0	0	Carnivora	54483.0	0	Canidae	54483.0	0	Canis	54483.0	0	Canis lupus	54483.0	0
scf7180000053354	3726	0.4369	0	452.134	no-hit	0.0	0	no-hit	0.0	0	no-hit	0.0	0	no-hit	0.0	0	no-hit	0.0	0	no-hit	0.0	0
scf7180000044370	4802	0.444	0	75.7298	Eukaryota	515.0	0	Chordata	515.0	0	Kurtiformes	348.0	1	Apogonidae	348.0	1	Sphaeramia	348.0	1	Sphaeramia orbicularis	348.0	1
scf7180000041439	41954	0.4285	0	102.1266	Eukaryota	2757.0	1	Chordata	2757.0	1	Carnivora	2757.0	1	Canidae	2757.0	1	Canis	2757.0	1	Canis lupus	2757.0	1
scf7180000048406	11991	0.44	0	216.2733	Eukaryota	1649.0	0	Chordata	1065.0	1	Kurtiformes	898.0	2	Apogonidae	898.0	2	Sphaeramia	898.0	2	Sphaeramia orbicularis	898.0	2
scf7180000040722	117895	0.3885	0	68.4354	Eukaryota	19538.0	0	Chordata	19538.0	0	Carnivora	17637.0	1	Canidae	15309.0	2	Canis	12444.0	4	Canis lupus	12444.0	4
scf7180000043249	260066	0.3596	0	58.8934	Eukaryota	84867.0	0	Chordata	84867.0	0	Carnivora	84867.0	0	Canidae	84867.0	0	Canis	84867.0	0	Canis lupus	84867.0	0
scf7180000048403	6918	0.4351	0	202.5924	Eukaryota	594.0	0	Platyhelminthes	594.0	0	Polystomatidea	594.0	0	Polystomatidae	594.0	0	Protopolystoma	594.0	0	Protopolystoma xenopodis	594.0	0
scf7180000048220	37572	0.4463	0	145.8134	Eukaryota	42048.0	0	Chordata	21837.0	2	Cyclophyllidea	10994.0	9	Hymenolepididae	10994.0	9	Hymenolepis	10994.0	9	Hymenolepis microstoma	10994.0	9
scf7180000041213	1222923	0.4438	0	59.2777	Eukaryota	111272.0	0	Chordata	111272.0	0	Carnivora	111272.0	0	Canidae	111272.0	0	Canis	111272.0	0	Canis lupus	111272.0	0
scf7180000051695	5109	0.4339	0	173.2749	no-hit	0.0	0	no-hit	0.0	0	no-hit	0.0	0	no-hit	0.0	0	no-hit	0.0	0	no-hit	0.0	0
scf7180000048133	15903	0.4348	0	75.3917	Eukaryota	9594.0	0	Chordata	9594.0	0	Tetraodontiformes	4554.0	3	Tetraodontidae	4554.0	3	Takifugu	4554.0	4	Takifugu rubripes	4554.0	4
scf7180000055139	4586	0.4389	0	374.2691	no-hit	0.0	0	no-hit	0.0	0	no-hit	0.0	0	no-hit	0.0	0	no-hit	0.0	0	no-hit	0.0	0
scf7180000045887	3185	0.444	0	532.6095	Eukaryota	4983.0	0	Chordata	4983.0	0	Carnivora	4983.0	0	Canidae	4983.0	0	Canis	4983.0	0	Canis lupus	4983.0	0
scf7180000045926	182853	0.3995	0	61.1613	Eukaryota	45185.0	0	Chordata	45185.0	0	Carnivora	45185.0	0	Otariidae	12705.0	3	Zalophus	12705.0	4	Zalophus californianus	12705.0	5
scf7180000042299	713443	0.4023	0	60.3103	Eukaryota	89266.0	0	Chordata	89266.0	0	Carnivora	89266.0	0	Canidae	89266.0	0	Canis	89266.0	0	Canis lupus	89266.0	0
scf7180000044278	115115	0.3922	0	83.0611	Eukaryota	94088.0	0	Chordata	94088.0	0	Carnivora	94088.0	0	Canidae	94088.0	0	Canis	94088.0	0	Canis lupus	94088.0	0
scf7180000049437	5897	0.4328	0	197.0279	no-hit	0.0	0	no-hit	0.0	0	no-hit	0.0	0	no-hit	0.0	0	no-hit	0.0	0	no-hit	0.0	0
scf7180000050842	25331	0.5019	0	358.0347	Eukaryota	9471.0	0	Chordata	9471.0	0	Carnivora	9471.0	0	Canidae	9471.0	0	Canis	8265.0	1	Canis lupus	6978.0	2
scf7180000054834	4232	0.4362	0	325.3647	Eukaryota	2561.0	0	Chordata	2561.0	0	Carnivora	2561.0	0	Canidae	2561.0	0	Canis	2561.0	0	Canis lupus	2561.0	0
scf7180000056611	438005	0.3802	0	60.5594	Eukaryota	68753.0	0	Chordata	68753.0	0	Carnivora	68753.0	0	Canidae	68753.0	0	Canis	51047.0	1	Canis lupus	51047.0	1
scf7180000054547	26072	0.4412	0	311.0749	Eukaryota	3027.0	0	Platyhelminthes	1641.0	2	Polystomatidea	1641.0	2	Polystomatidae	1641.0	2	Protopolystoma	1641.0	2	Protopolystoma xenopodis	1641.0	2
scf7180000051555	11127	0.4418	0	1512.1619	Eukaryota	470.0	0	Chordata	470.0	0	Kurtiformes	470.0	0	Apogonidae	470.0	0	Sphaeramia	470.0	0	Sphaeramia orbicularis	470.0	0
scf7180000048081	51511	0.5324	0	57.7257	Eukaryota	14184.0	0	Chordata	14184.0	0	Carnivora	12436.0	1	Canidae	7399.0	5	Canis	4603.0	7	Canis lupus	4603.0	7
scf7180000041892	333563	0.4117	0	59.4718	Eukaryota	107430.0	0	Chordata	107430.0	0	Carnivora	107430.0	0	Canidae	57884.0	2	Canis	45010.0	5	Canis lupus	45010.0	6
scf7180000043909	399560	0.3389	0	58.6077	Eukaryota	89752.0	0	Chordata	89752.0	0	Carnivora	89752.0	0	Canidae	89752.0	0	Canis	89752.0	0	Canis lupus	89752.0	0
scf7180000050687	19201	0.4474	0	57.9497	Eukaryota	1376.0	0	Platyhelminthes	712.0	2	Polystomatidea	712.0	3	Polystomatidae	712.0	3	Protopolystoma	712.0	3	Protopolystoma xenopodis	712.0	3
scf7180000049827	7367	0.4372	0	153.1743	no-hit	0.0	0	no-hit	0.0	0	no-hit	0.0	0	no-hit	0.0	0	no-hit	0.0	0	no-hit	0.0	0
scf7180000044722	95697	0.461	0	56.4218	Eukaryota	23654.0	0	Chordata	23654.0	0	Carnivora	23654.0	0	Canidae	23654.0	0	Canis	23654.0	0	Canis lupus	23654.0	0
scf7180000042327	706921	0.478	0	59.8513	Eukaryota	179203.0	0	Chordata	179203.0	0	Carnivora	179203.0	0	Canidae	174817.0	1	Canis	174817.0	1	Canis lupus	174817.0	1
scf7180000045143	68716	0.4166	0	57.9049	Eukaryota	61361.0	0	Chordata	61361.0	0	Carnivora	61361.0	0	Canidae	61361.0	0	Canis	52286.0	1	Canis lupus	52286.0	1
scf7180000052960	5663	0.4478	0	1769.1424	no-hit	0.0	0	no-hit	0.0	0	no-hit	0.0	0	no-hit	0.0	0	no-hit	0.0	0	no-hit	0.0	0
scf7180000048482	76210	0.4074	0	60.1854	Eukaryota	49583.0	0	Chordata	49583.0	0	Carnivora	49583.0	0	Canidae	49583.0	0	Canis	49583.0	0	Canis lupus	49583.0	0
scf7180000050454	9646	0.4494	0	1602.0294	Eukaryota	3376.0	0	Platyhelminthes	1892.0	2	Polystomatidea	1892.0	2	Polystomatidae	1892.0	2	Protopolystoma	1892.0	2	Protopolystoma xenopodis	1892.0	2
scf7180000041157	365486	0.3451	0	58.8137	Eukaryota	76073.0	0	Chordata	76073.0	0	Carnivora	76073.0	0	Canidae	76073.0	0	Canis	76073.0	0	Canis lupus	76073.0	0
scf7180000049305	30562	0.4223	0	58.9539	Eukaryota	5605.0	0	Chordata	5605.0	0	Carnivora	3673.0	1	Otariidae	2236.0	2	Homo	1932.0	4	Homo sapiens	1932.0	4
scf7180000052374	14319	0.6464	0	334.3726	Eukaryota	34370.0	0	Chordata	34370.0	0	Artiodactyla	24033.0	2	Bovidae	24033.0	2	Ovis	15654.0	3	Ovis aries	15654.0	3
scf7180000044445	15726	0.4119	0	54.299	Eukaryota	26820.0	0	Chordata	26820.0	0	Carnivora	22175.0	2	Canidae	18468.0	3	Canis	18468.0	6	Canis lupus	18468.0	6
scf7180000047383	85806	0.375	0	61.6185	Eukaryota	9989.0	0	Chordata	9989.0	0	Carnivora	9989.0	0	Canidae	7112.0	2	Canis	6090.0	3	Canis lupus	6090.0	4
scf7180000053800	3554	0.5059	0	26.7247	Eukaryota	5802.0	0	Chordata	5802.0	0	Carnivora	5802.0	0	Canidae	5802.0	0	Canis	3864.0	1	Canis lupus	3136.0	2
scf7180000044719	217252	0.3721	0	60.1371	Eukaryota	22024.0	0	Chordata	22024.0	0	Carnivora	22024.0	0	Canidae	22024.0	0	Canis	22024.0	0	Canis lupus	22024.0	0
scf7180000043813	113426	0.3494	0	54.951	Eukaryota	85679.0	0	Chordata	85679.0	0	Carnivora	85679.0	0	Canidae	85679.0	0	Canis	85679.0	0	Canis lupus	85679.0	0
scf7180000050519	2990	0.4331	0	86.6378	Eukaryota	139.0	0	Chordata	139.0	0	Salmoniformes	139.0	0	Salmonidae	139.0	0	Coregonus	139.0	0	Coregonus sp. 'balchen'	139.0	0
scf7180000043850	34135	0.5346	0	50.2865	Eukaryota	34981.0	0	Chordata	34981.0	0	Carnivora	34981.0	0	Canidae	34981.0	0	Canis	34981.0	0	Canis lupus	34981.0	0
scf7180000042426	54569	0.3862	0	62.0062	Eukaryota	92162.0	0	Chordata	92162.0	0	Carnivora	92162.0	0	Canidae	92162.0	0	Canis	92162.0	0	Canis lupus	92162.0	0
scf7180000051553	10950	0.4509	0	1368.01	no-hit	0.0	0	no-hit	0.0	0	no-hit	0.0	0	no-hit	0.0	0	no-hit	0.0	0	no-hit	0.0	0
scf7180000047392	20207	0.4392	0	310.2475	no-hit	0.0	0	no-hit	0.0	0	no-hit	0.0	0	no-hit	0.0	0	no-hit	0.0	0	no-hit	0.0	0
scf7180000043659	399433	0.4517	0	57.7159	Eukaryota	80187.0	0	Chordata	80187.0	0	Carnivora	80187.0	0	Canidae	80187.0	0	Canis	64965.0	1	Canis lupus	64965.0	1
scf7180000052721	5689	0.4959	0	82.0814	Eukaryota	8198.0	0	Chordata	8198.0	0	Carnivora	8198.0	0	Canidae	8198.0	0	Canis	6708.0	1	Canis lupus	5732.0	2
scf7180000051626	21942	0.5035	0	418.5938	Eukaryota	9288.0	0	Chordata	9288.0	0	Carnivora	9288.0	0	Canidae	9288.0	0	Canis	7523.0	1	Canis lupus	6235.0	2
scf7180000051152	17781	0.4347	0	61.4434	Eukaryota	3387.0	0	Chordata	3387.0	0	Carnivora	1510.0	2	Canidae	1510.0	3	Canis	1510.0	3	Canis lupus	1510.0	3
scf7180000046464	119534	0.4392	0	80.6044	Eukaryota	91677.0	0	Chordata	91677.0	0	Carnivora	91677.0	0	Canidae	91677.0	0	Canis	91677.0	0	Canis lupus	91677.0	0
scf7180000049606	9004	0.4499	0	184.1669	Eukaryota	571.0	0	Chordata	571.0	0	Kurtiformes	571.0	0	Apogonidae	571.0	0	Sphaeramia	571.0	0	Sphaeramia orbicularis	571.0	0
scf7180000053325	3179	0.4281	0	108.9494	no-hit	0.0	0	no-hit	0.0	0	no-hit	0.0	0	no-hit	0.0	0	no-hit	0.0	0	no-hit	0.0	0
scf7180000052006	9722	0.4425	0	88.7289	Eukaryota	7422.0	0	Chordata	6995.0	1	Tetraodontiformes	5037.0	2	Tetraodontidae	5037.0	2	Takifugu	5037.0	2	Takifugu rubripes	4392.0	3
scf7180000049406	11683	0.4418	0	573.3126	Eukaryota	4594.0	0	Platyhelminthes	2477.0	3	Polystomatidea	2477.0	3	Polystomatidae	2477.0	3	Protopolystoma	2477.0	3	Protopolystoma xenopodis	2477.0	3
scf7180000053222	1738	0.454	0	188.7254	no-hit	0.0	0	no-hit	0.0	0	no-hit	0.0	0	no-hit	0.0	0	no-hit	0.0	0	no-hit	0.0	0
scf7180000045409	31790	0.4436	0	1037.4586	Eukaryota	3713.0	0	Chordata	1969.0	1	Polystomatidea	1744.0	2	Polystomatidae	1744.0	2	Protopolystoma	1744.0	2	Protopolystoma xenopodis	1744.0	2
scf7180000043014	566799	0.4038	0	60.3672	Eukaryota	94986.0	0	Chordata	94986.0	0	Carnivora	94986.0	0	Canidae	94986.0	0	Canis	94986.0	0	Canis lupus	94986.0	0
scf7180000046606	120292	0.3487	0	58.8493	Eukaryota	12954.0	0	Chordata	12954.0	0	Carnivora	11006.0	1	Canidae	11006.0	1	Canis	11006.0	2	Canis lupus	11006.0	2
scf7180000041282	145330	0.4843	0	57.0956	Eukaryota	32180.0	0	Chordata	32180.0	0	Carnivora	32180.0	0	Canidae	32180.0	0	Canis	29832.0	1	Canis lupus	29832.0	1
scf7180000046318	5179	0.4931	0	32.7848	Eukaryota	3294.0	0	Chordata	3294.0	0	Carnivora	2848.0	1	Canidae	2848.0	1	Canis	2848.0	1	Canis lupus	2848.0	1
scf7180000041479	1017698	0.4007	0	60.6625	Eukaryota	195141.0	0	Chordata	195141.0	0	Carnivora	195141.0	0	Canidae	195141.0	0	Canis	195141.0	0	Canis lupus	195141.0	0
scf7180000042954	285968	0.3687	0	60.6526	Eukaryota	26108.0	0	Chordata	26108.0	0	Carnivora	26108.0	0	Canidae	26108.0	0	Canis	23070.0	1	Canis lupus	23070.0	1
scf7180000044070	344914	0.4304	0	59.9171	Eukaryota	72388.0	0	Chordata	72388.0	0	Carnivora	72388.0	0	Canidae	66881.0	1	Canis	66881.0	1	Canis lupus	66881.0	1
scf7180000042605	14852	0.3861	0	39.4041	Eukaryota	4468.0	0	Chordata	4468.0	0	Carnivora	4468.0	0	Canidae	4468.0	0	Canis	4468.0	0	Canis lupus	4468.0	0
scf7180000043841	393922	0.4222	0	59.2688	Eukaryota	25872.0	0	Chordata	25872.0	0	Carnivora	25872.0	0	Canidae	25872.0	0	Canis	25872.0	0	Canis lupus	25872.0	0
scf7180000054879	17975	0.4222	0	231.8003	Eukaryota	63957.0	0	Chordata	63957.0	0	Carnivora	63957.0	0	Canidae	63957.0	0	Canis	63957.0	0	Canis lupus	63957.0	0
scf7180000045904	44365	0.4443	0	72.6428	Eukaryota	81706.0	0	Platyhelminthes	46512.0	1	Strigeidida	34401.0	4	Schistosomatidae	34401.0	4	Schistosoma	34401.0	4	Schistosoma mansoni	34401.0	4
scf7180000044353	65414	0.5091	0	57.8046	Eukaryota	36924.0	0	Chordata	36924.0	0	Carnivora	36924.0	0	Canidae	36924.0	0	Canis	31726.0	1	Canis lupus	31726.0	1
scf7180000046533	42203	0.4428	0	106.2132	Eukaryota	15265.0	0	Chordata	12225.0	3	Gadiformes	6464.0	7	Gadidae	6464.0	7	Gadus	6464.0	7	Gadus morhua	6464.0	7
scf7180000052110	3905	0.4551	0	445.5359	Eukaryota	747.0	0	Streptophyta	484.0	1	Fabales	484.0	1	Fabaceae	484.0	1	Cicer	484.0	1	Cicer arietinum	484.0	1
scf7180000056304	264315	0.3587	0	58.4325	Eukaryota	54204.0	0	Chordata	54204.0	0	Carnivora	54204.0	0	Canidae	54204.0	0	Canis	54204.0	0	Canis lupus	54204.0	0
scf7180000044005	41005	0.3965	0	54.4995	Eukaryota	94900.0	0	Chordata	94900.0	0	Carnivora	94900.0	0	Canidae	94900.0	0	Canis	94900.0	0	Canis lupus	94900.0	0
scf7180000042818	583377	0.4121	0	60.8195	Eukaryota	61816.0	0	Chordata	61816.0	0	Carnivora	52867.0	1	Canidae	39692.0	2	Canis	25014.0	4	Canis lupus	25014.0	5
scf7180000056545	204819	0.3802	0	59.8306	Eukaryota	11457.0	0	Chordata	11457.0	0	Carnivora	11457.0	0	Canidae	11457.0	0	Canis	8906.0	1	Canis lupus	8906.0	1
scf7180000056610	594025	0.3458	0	59.889	Eukaryota	119776.0	0	Chordata	119776.0	0	Carnivora	46893.0	2	Bovidae	41279.0	4	Ovis	41279.0	4	Rousettus aegyptiacus	31604.0	5
scf7180000046688	90214	0.3372	0	60.1971	Eukaryota	43568.0	0	Chordata	43568.0	0	Carnivora	43568.0	0	Canidae	31689.0	2	Canis	25449.0	3	Canis lupus	25449.0	3
scf7180000053498	14148	0.4167	0	51.4716	Eukaryota	8726.0	0	Chordata	8726.0	0	Primates	3697.0	4	Hominidae	2838.0	5	Homo	2838.0	6	Homo sapiens	2838.0	6
scf7180000048185	52861	0.4479	0	93.2922	Eukaryota	11013.0	0	Chordata	10185.0	1	Carnivora	9387.0	2	Canidae	9387.0	2	Canis	8419.0	3	Canis lupus	7739.0	4
scf7180000047357	64068	0.4428	0	215.8532	Eukaryota	96793.0	0	Platyhelminthes	51052.0	1	Strigeidida	37680.0	4	Schistosomatidae	37680.0	4	Schistosoma	37680.0	4	Schistosoma mansoni	37680.0	4
scf7180000045099	230565	0.4294	0	60.5398	Eukaryota	72043.0	0	Chordata	72043.0	0	Carnivora	72043.0	0	Canidae	72043.0	0	Canis	72043.0	0	Canis lupus	72043.0	0
scf7180000054787	20607	0.3983	0	93.2994	Eukaryota	89700.0	0	Chordata	89700.0	0	Carnivora	89700.0	0	Canidae	89700.0	0	Canis	89700.0	0	Canis lupus	89700.0	0
scf7180000045492	126714	0.3599	0	57.5353	Eukaryota	91520.0	0	Chordata	91520.0	0	Carnivora	91520.0	0	Canidae	91520.0	0	Canis	91520.0	0	Canis lupus	91520.0	0
scf7180000048696	26001	0.4446	0	250.7905	Eukaryota	20797.0	0	Chordata	11420.0	3	Gadiformes	7836.0	6	Gadidae	7836.0	6	Gadus	7836.0	6	Gadus morhua	7836.0	6
scf7180000040637	222576	0.3579	0	57.9316	Eukaryota	16234.0	0	Chordata	16234.0	0	Carnivora	16234.0	0	Otariidae	11302.0	1	Canis	4932.0	3	Canis lupus	4932.0	3
scf7180000053158	3647	0.4513	0	310.699	Eukaryota	1626.0	0	Echinodermata	584.0	3	Forcipulatida	584.0	3	Asteriidae	584.0	3	Asterias	584.0	3	Asterias rubens	584.0	3
scf7180000048145	96473	0.3445	0	60.2661	Eukaryota	8338.0	0	Chordata	8338.0	0	Carnivora	8338.0	0	Canidae	3340.0	2	Canis	3340.0	3	Canis lupus	3340.0	3
scf7180000050804	5698	0.4456	0	104.0096	Eukaryota	1018.0	0	Chordata	1018.0	0	Salmoniformes	1018.0	0	Salmonidae	1018.0	0	Salmo	1018.0	0	Salmo trutta	1018.0	0
scf7180000056572	151455	0.5283	0	58.6764	Eukaryota	62405.0	0	Chordata	62405.0	0	Carnivora	62405.0	0	Canidae	62405.0	0	Canis	57511.0	1	Canis lupus	57511.0	1
scf7180000041961	839563	0.4499	0	60.6997	Eukaryota	66958.0	0	Chordata	66958.0	0	Carnivora	66958.0	0	Canidae	21585.0	4	Canis	14427.0	8	Canis lupus	14427.0	8
scf7180000051628	6039	0.4338	0	63.4494	no-hit	0.0	0	no-hit	0.0	0	no-hit	0.0	0	no-hit	0.0	0	no-hit	0.0	0	no-hit	0.0	0
scf7180000045449	250600	0.3722	0	60.0677	Eukaryota	22199.0	0	Chordata	22199.0	0	Carnivora	19774.0	1	Phocidae	8772.0	3	Leptonychotes	8772.0	3	Leptonychotes weddellii	8772.0	3
scf7180000048701	5974	0.4381	0	66.5137	no-hit	0.0	0	no-hit	0.0	0	no-hit	0.0	0	no-hit	0.0	0	no-hit	0.0	0	no-hit	0.0	0
scf7180000047065	7739	0.455	0	26.6304	Eukaryota	4035.0	0	Chordata	4035.0	0	Carnivora	4035.0	0	Canidae	4035.0	0	Canis	4035.0	0	Canis lupus	4035.0	0
scf7180000041826	559468	0.3527	0	60.0703	Eukaryota	91663.0	0	Chordata	91663.0	0	Carnivora	91663.0	0	Canidae	91663.0	0	Canis	91663.0	0	Canis lupus	91663.0	0
scf7180000054467	161556	0.4621	0	67.5076	Eukaryota	82220.0	0	Chordata	82220.0	0	Carnivora	82220.0	0	Canidae	82220.0	0	Canis	82220.0	0	Canis lupus	82220.0	0
scf7180000044248	313499	0.4248	0	59.4656	Eukaryota	55724.0	0	Chordata	55724.0	0	Carnivora	55724.0	0	Mustelidae	39568.0	1	Mustela	39568.0	1	Mustela putorius	39568.0	1
scf7180000044628	226307	0.4572	0	59.6626	Eukaryota	57845.0	0	Chordata	57845.0	0	Carnivora	57845.0	0	Canidae	43465.0	2	Canis	32386.0	3	Canis lupus	32386.0	3
scf7180000045972	4330	0.4178	0	29.8379	Eukaryota	31543.0	0	Chordata	31543.0	0	Carnivora	31543.0	0	Canidae	31543.0	0	Canis	31543.0	0	Canis lupus	31543.0	0
scf7180000051469	16660	0.3924	0	58.2054	Eukaryota	11801.0	0	Chordata	11801.0	0	Carnivora	11801.0	0	Canidae	11801.0	0	Canis	11801.0	0	Canis lupus	11801.0	0
scf7180000043477	543233	0.3966	0	60.6431	Eukaryota	75704.0	0	Chordata	75704.0	0	Carnivora	75704.0	0	Canidae	48371.0	2	Canis	29089.0	3	Canis lupus	29089.0	4
scf7180000047489	20633	0.4441	0	53.7828	Eukaryota	4814.0	0	Chordata	3369.0	1	Kurtiformes	1790.0	3	Apogonidae	1790.0	3	Sphaeramia	1790.0	4	Sphaeramia orbicularis	1790.0	4
scf7180000042901	7525	0.4918	0	54.7927	Eukaryota	31691.0	0	Chordata	31691.0	0	Carnivora	31691.0	0	Canidae	31691.0	0	Canis	31691.0	0	Canis lupus	31691.0	0
scf7180000040540	2539794	0.3839	0	59.8817	Eukaryota	167920.0	0	Chordata	167920.0	0	Carnivora	167920.0	0	Canidae	167920.0	0	Canis	167920.0	0	Canis lupus	167920.0	0
scf7180000050664	12371	0.4461	0	74.2729	no-hit	0.0	0	no-hit	0.0	0	no-hit	0.0	0	no-hit	0.0	0	no-hit	0.0	0	no-hit	0.0	0
scf7180000047589	23044	0.4515	0	1685.178	no-hit	0.0	0	no-hit	0.0	0	no-hit	0.0	0	no-hit	0.0	0	no-hit	0.0	0	no-hit	0.0	0
scf7180000042336	276018	0.3382	0	58.153	Eukaryota	50075.0	0	Chordata	50075.0	0	Carnivora	50075.0	0	Canidae	50075.0	0	Canis	50075.0	0	Canis lupus	50075.0	0
scf7180000048202	76090	0.4356	0	62.216	Eukaryota	70803.0	0	Chordata	70803.0	0	Carnivora	70803.0	0	Canidae	70803.0	0	Canis	70803.0	0	Canis lupus	70803.0	0
scf7180000043412	458687	0.4529	0	57.5284	Eukaryota	64415.0	0	Chordata	64415.0	0	Carnivora	64415.0	0	Canidae	40746.0	2	Canis	33745.0	4	Canis lupus	33745.0	4
scf7180000045856	89071	0.3875	0	56.6326	Eukaryota	58589.0	0	Chordata	58589.0	0	Carnivora	58589.0	0	Canidae	58589.0	0	Canis	58589.0	0	Canis lupus	58589.0	0
scf7180000043520	446640	0.3516	0	61.6098	Eukaryota	52032.0	0	Chordata	52032.0	0	Carnivora	42042.0	1	Canidae	42042.0	1	Canis	42042.0	1	Canis lupus	42042.0	1
scf7180000047947	12058	0.4426	0	62.2706	Eukaryota	9543.0	0	Chordata	8090.0	1	Kurtiformes	3893.0	3	Apogonidae	3893.0	3	Sphaeramia	3893.0	3	Sphaeramia orbicularis	3893.0	3
scf7180000048302	13734	0.6625	0	409.8992	Eukaryota	66958.0	0	Chordata	66958.0	0	Artiodactyla	27700.0	3	Bovidae	27700.0	3	Ovis	27700.0	4	Ovis aries	27700.0	4
scf7180000051105	4829	0.4543	0	105.8331	no-hit	0.0	0	no-hit	0.0	0	no-hit	0.0	0	no-hit	0.0	0	no-hit	0.0	0	no-hit	0.0	0
scf7180000045830	155411	0.4079	0	59.9522	Eukaryota	63393.0	0	Chordata	63393.0	0	Carnivora	63393.0	0	Canidae	63393.0	0	Canis	63393.0	0	Canis lupus	63393.0	0
scf7180000043785	401167	0.3564	0	59.1477	Eukaryota	50814.0	0	Chordata	50814.0	0	Carnivora	50814.0	0	Canidae	50814.0	0	Canis	50814.0	0	Canis lupus	50814.0	0
scf7180000051851	2802	0.4465	0	541.9815	no-hit	0.0	0	no-hit	0.0	0	no-hit	0.0	0	no-hit	0.0	0	no-hit	0.0	0	no-hit	0.0	0
scf7180000051901	4496	0.4448	0	258.2502	Eukaryota	1421.0	0	Platyhelminthes	1421.0	0	Polystomatidea	1085.0	2	Polystomatidae	1085.0	2	Protopolystoma	1085.0	2	Protopolystoma xenopodis	1085.0	2
scf7180000041032	665380	0.3888	0	60.3492	Eukaryota	93722.0	0	Chordata	93722.0	0	Carnivora	93722.0	0	Canidae	93722.0	0	Canis	93722.0	0	Canis lupus	93722.0	0
scf7180000046475	18394	0.3753	0	49.6202	Eukaryota	3838.0	1	Chordata	3838.0	1	Carnivora	2693.0	2	Canidae	2693.0	3	Canis	1956.0	4	Canis lupus	1956.0	4
scf7180000047615	8524	0.4503	0	159.553	Eukaryota	2217.0	0	Chordata	1500.0	2	Kurtiformes	1269.0	3	Apogonidae	1269.0	3	Sphaeramia	1269.0	3	Sphaeramia orbicularis	1269.0	3
scf7180000046741	15811	0.4344	0	241.3653	no-hit	0.0	0	no-hit	0.0	0	no-hit	0.0	0	no-hit	0.0	0	no-hit	0.0	0	no-hit	0.0	0
scf7180000045314	15022	0.4317	0	383.7704	Eukaryota	89893.0	0	Chordata	89893.0	0	Carnivora	89893.0	0	Canidae	89893.0	0	Canis	89893.0	0	Canis lupus	89893.0	0
scf7180000042020	4640	0.4011	0	26.9471	Eukaryota	3366.0	0	Chordata	3366.0	0	Carnivora	3366.0	0	Canidae	3366.0	0	Canis	3366.0	0	Canis lupus	3366.0	0
scf7180000055641	13661	0.4372	0	292.2762	no-hit	0.0	0	no-hit	0.0	0	no-hit	0.0	0	no-hit	0.0	0	no-hit	0.0	0	no-hit	0.0	0
scf7180000055588	17547	0.4436	0	107.4862	Eukaryota	1348.0	0	Platyhelminthes	873.0	1	Polystomatidea	873.0	1	Polystomatidae	873.0	1	Protopolystoma	873.0	1	Protopolystoma xenopodis	873.0	1
scf7180000047599	100802	0.4168	0	59.3598	Eukaryota	9464.0	1	Chordata	9464.0	1	Primates	6234.0	3	Hominidae	4987.0	4	Homo	4987.0	6	Homo sapiens	4987.0	6
scf7180000051771	17654	0.4457	0	57.3382	no-hit	0.0	0	no-hit	0.0	0	no-hit	0.0	0	no-hit	0.0	0	no-hit	0.0	0	no-hit	0.0	0
scf7180000040730	1837418	0.3589	0	59.7063	Eukaryota	94641.0	0	Chordata	94641.0	0	Carnivora	94641.0	0	Canidae	94641.0	0	Canis	94641.0	0	Canis lupus	94641.0	0
scf7180000054541	68833	0.4236	0	141.3028	Eukaryota	116859.0	0	Chordata	116859.0	0	Carnivora	116859.0	0	Canidae	92530.0	2	Canis	92530.0	2	Canis lupus	92530.0	2
scf7180000041481	1043299	0.439	0	60.8768	Eukaryota	44126.0	0	Chordata	44126.0	0	Carnivora	44126.0	0	Canidae	44126.0	0	Canis	38851.0	1	Canis lupus	38851.0	1
scf7180000043006	550973	0.4199	0	60.2748	Eukaryota	47091.0	0	Chordata	47091.0	0	Carnivora	26977.0	1	Canidae	26977.0	2	Canis	18594.0	4	Canis lupus	18594.0	4
scf7180000040969	281245	0.4147	0	58.5855	Eukaryota	53283.0	0	Chordata	53283.0	0	Carnivora	53283.0	0	Canidae	53283.0	0	Canis	53283.0	0	Canis lupus	53283.0	0
scf7180000050597	32930	0.4533	0	65.8566	Eukaryota	30300.0	0	Chordata	30300.0	0	Carnivora	30300.0	0	Canidae	30300.0	0	Canis	30300.0	0	Canis lupus	30300.0	0
scf7180000042161	754319	0.372	0	58.8905	Eukaryota	57417.0	0	Chordata	57417.0	0	Carnivora	57417.0	0	Canidae	57417.0	0	Canis	57417.0	0	Canis lupus	57417.0	0
scf7180000050367	10594	0.4531	0	892.0093	Eukaryota	20115.0	0	Chordata	19487.0	1	Gadiformes	12991.0	6	Gadidae	12991.0	6	Gadus	12991.0	6	Gadus morhua	12991.0	6
scf7180000045983	162744	0.6776	0	54.2465	Eukaryota	32217.0	0	Chordata	32217.0	0	Carnivora	32217.0	0	Canidae	32217.0	0	Canis	24376.0	1	Canis lupus	24376.0	1
scf7180000055831	12584	0.4361	0	66.0884	Eukaryota	3252.0	0	Platyhelminthes	2020.0	1	Polystomatidea	2020.0	3	Polystomatidae	2020.0	3	Protopolystoma	2020.0	3	Protopolystoma xenopodis	2020.0	3
scf7180000043450	133320	0.5354	0	54.7293	Eukaryota	35760.0	0	Chordata	35760.0	0	Carnivora	35760.0	0	Canidae	35760.0	0	Canis	35760.0	0	Canis lupus	35760.0	0
scf7180000045417	221165	0.3951	0	59.1184	Eukaryota	95123.0	0	Chordata	95123.0	0	Carnivora	95123.0	0	Canidae	95123.0	0	Canis	95123.0	0	Canis lupus	95123.0	0
scf7180000050023	17105	0.4427	0	174.4244	Eukaryota	3148.0	0	Chordata	3148.0	0	Carnivora	3148.0	0	Canidae	3148.0	0	Canis	3148.0	0	Canis lupus	3148.0	0
scf7180000050078	7409	0.4478	0	1775.4637	Eukaryota	1179.0	0	Echinodermata	688.0	2	Forcipulatida	688.0	2	Asteriidae	688.0	2	Asterias	688.0	2	Asterias rubens	688.0	2
scf7180000045271	262762	0.463	100	58.8151	Eukaryota	41333.0	0	Chordata	41333.0	0	Carnivora	41333.0	0	Canidae	41333.0	0	Canis	41333.0	0	Canis lupus	41333.0	0
scf7180000045496	208012	0.339	0	58.9335	Eukaryota	71056.0	0	Chordata	71056.0	0	Carnivora	71056.0	0	Canidae	71056.0	0	Canis	71056.0	0	Canis lupus	71056.0	0
scf7180000040728	1947400	0.3715	0	61.1768	Eukaryota	130102.0	0	Chordata	130102.0	0	Carnivora	130102.0	0	Canidae	130102.0	0	Vulpes	84210.0	1	Vulpes vulpes	84210.0	1
scf7180000047448	176604	0.4465	0	58.4365	Eukaryota	11550.0	0	Chordata	11550.0	0	Carnivora	11550.0	0	Canidae	11550.0	0	Canis	11550.0	0	Canis lupus	11550.0	0
scf7180000048648	5661	0.4393	0	58.7685	Eukaryota	11268.0	0	Chordata	11268.0	0	Carnivora	11268.0	0	Otariidae	4264.0	3	Canis	2574.0	5	Canis lupus	2574.0	5
scf7180000042042	19751	0.4389	0	59.4387	Eukaryota	49767.0	0	Chordata	49767.0	0	Carnivora	49767.0	0	Canidae	49767.0	0	Canis	49767.0	0	Canis lupus	49767.0	0
scf7180000042812	77704	0.4192	0	58.1877	Eukaryota	75187.0	0	Chordata	75187.0	0	Carnivora	75187.0	0	Canidae	75187.0	0	Canis	75187.0	0	Canis lupus	75187.0	0
scf7180000044442	302104	0.385	0	75.6801	Eukaryota	89328.0	0	Chordata	89328.0	0	Carnivora	89328.0	0	Canidae	89328.0	0	Canis	89328.0	0	Canis lupus	89328.0	0
scf7180000041133	183872	0.4705	0	72.0018	Eukaryota	115246.0	0	Chordata	115246.0	0	Carnivora	115246.0	0	Canidae	115246.0	0	Canis	115246.0	0	Canis lupus	115246.0	0
scf7180000042516	688181	0.4562	0	59.3922	Eukaryota	41818.0	0	Chordata	41818.0	0	Carnivora	33554.0	1	Canidae	33554.0	1	Canis	33554.0	1	Canis lupus	33554.0	1
scf7180000046493	10902	0.4329	0	78.1585	Eukaryota	3115.0	0	Platyhelminthes	1187.0	3	Polystomatidea	1187.0	3	Polystomatidae	1187.0	3	Protopolystoma	1187.0	3	Protopolystoma xenopodis	1187.0	3
scf7180000046429	7801	0.4571	0	149.0057	Eukaryota	3412.0	0	Chordata	3412.0	0	Carnivora	1942.0	2	Canidae	1942.0	2	Canis	1942.0	2	Canis lupus	1942.0	2
scf7180000051310	6655	0.5077	0	124.9477	Eukaryota	7910.0	0	Chordata	7910.0	0	Carnivora	7910.0	0	Canidae	7910.0	0	Canis	6469.0	1	Canis lupus	5417.0	2
scf7180000052190	3533	0.4464	0	355.4152	no-hit	0.0	0	no-hit	0.0	0	no-hit	0.0	0	no-hit	0.0	0	no-hit	0.0	0	no-hit	0.0	0
scf7180000048511	3860	0.435	0	93.4021	no-hit	0.0	0	no-hit	0.0	0	no-hit	0.0	0	no-hit	0.0	0	no-hit	0.0	0	no-hit	0.0	0
scf7180000056466	548057	0.4257	0	60.0001	Eukaryota	80265.0	0	Chordata	80265.0	0	Carnivora	80265.0	0	Canidae	80265.0	0	Canis	80265.0	0	Canis lupus	80265.0	0
scf7180000046247	61850	0.5377	0	68.3908	Eukaryota	23858.0	0	Chordata	23858.0	0	Carnivora	22471.0	1	Canidae	22471.0	1	Canis	22471.0	1	Canis lupus	22471.0	1
scf7180000051586	1410	0.4369	0	449.199	no-hit	0.0	0	no-hit	0.0	0	no-hit	0.0	0	no-hit	0.0	0	no-hit	0.0	0	no-hit	0.0	0
scf7180000047704	4824	0.4442	0	107.7499	no-hit	0.0	0	no-hit	0.0	0	no-hit	0.0	0	no-hit	0.0	0	no-hit	0.0	0	no-hit	0.0	0
scf7180000043276	172144	0.3567	0	56.0013	Eukaryota	92041.0	0	Chordata	92041.0	0	Carnivora	92041.0	0	Canidae	92041.0	0	Canis	92041.0	0	Canis lupus	92041.0	0
scf7180000049216	52220	0.4411	0	65.0196	Eukaryota	10057.0	0	Chordata	7944.0	1	Tetraodontiformes	4845.0	4	Tetraodontidae	4845.0	4	Takifugu	4845.0	4	Takifugu rubripes	4845.0	4
scf7180000040720	9086	0.3903	0	31.3888	Eukaryota	2356.0	1	Chordata	2356.0	1	Primates	1254.0	2	Hominidae	1254.0	3	Canis	708.0	4	Canis lupus	708.0	4
scf7180000048051	10632	0.4402	0	62.0318	Eukaryota	3587.0	0	Chordata	3195.0	1	Kurtiformes	2862.0	2	Apogonidae	2862.0	2	Sphaeramia	2862.0	2	Sphaeramia orbicularis	2862.0	2
scf7180000056398	1027455	0.4097	0	59.9898	Eukaryota	75776.0	0	Chordata	75776.0	0	Carnivora	75776.0	0	Canidae	75776.0	0	Canis	70184.0	1	Canis lupus	70184.0	1
scf7180000045822	13968	0.4466	0	163.4839	Eukaryota	38273.0	0	Chordata	26851.0	1	Cyclophyllidea	7649.0	8	Hymenolepididae	7649.0	8	Hymenolepis	7649.0	8	Hymenolepis microstoma	7649.0	8
scf7180000043835	302992	0.4151	0	59.4013	Eukaryota	55479.0	0	Chordata	55479.0	0	Carnivora	55479.0	0	Canidae	55479.0	0	Canis	55479.0	0	Canis lupus	55479.0	0
scf7180000054452	16038	0.4431	0	166.3072	no-hit	0.0	0	no-hit	0.0	0	no-hit	0.0	0	no-hit	0.0	0	no-hit	0.0	0	no-hit	0.0	0
scf7180000043587	423168	0.4779	0	58.1329	Eukaryota	39507.0	0	Chordata	39507.0	0	Carnivora	28404.0	3	Canidae	28404.0	3	Canis	28404.0	3	Canis lupus	28404.0	3
scf7180000044714	70590	0.3941	0	88.4074	Eukaryota	47683.0	0	Chordata	47683.0	0	Carnivora	47683.0	0	Canidae	47683.0	0	Canis	47683.0	0	Canis lupus	47683.0	0
scf7180000051011	11931	0.503	0	734.1218	Eukaryota	9196.0	0	Chordata	9196.0	0	Carnivora	9196.0	0	Canidae	9196.0	0	Canis	7464.0	1	Canis lupus	6236.0	2
scf7180000056541	174741	0.3672	0	59.787	Eukaryota	59066.0	0	Chordata	59066.0	0	Carnivora	59066.0	0	Canidae	59066.0	0	Canis	59066.0	0	Canis lupus	59066.0	0
scf7180000048582	41620	0.454	0	56.8797	Eukaryota	3304.0	0	Chordata	3304.0	0	Carnivora	2105.0	2	Canidae	2105.0	2	Canis	2105.0	3	Canis lupus	2105.0	3
scf7180000041898	889545	0.4652	0	58.322	Eukaryota	54648.0	0	Chordata	54648.0	0	Carnivora	54648.0	0	Canidae	54648.0	0	Canis	54648.0	0	Canis lupus	54648.0	0
scf7180000056409	547395	0.491	0	58.7568	Eukaryota	96558.0	0	Chordata	96558.0	0	Carnivora	96558.0	0	Canidae	96558.0	0	Canis	96558.0	0	Canis lupus	96558.0	0
scf7180000044410	10794	0.4493	0	253.1062	Eukaryota	7381.0	0	Chordata	6563.0	1	Kurtiformes	5239.0	2	Apogonidae	5239.0	2	Sphaeramia	5239.0	2	Sphaeramia orbicularis	5239.0	2
scf7180000046335	129604	0.3602	0	59.8513	Eukaryota	62653.0	0	Chordata	62653.0	0	Carnivora	62653.0	0	Canidae	62653.0	0	Canis	62653.0	0	Canis lupus	62653.0	0
scf7180000040933	609218	0.3852	0	60.9143	Eukaryota	60422.0	0	Chordata	60422.0	0	Carnivora	60422.0	0	Canidae	60422.0	0	Canis	36234.0	1	Canis lupus	36234.0	1
scf7180000042287	556625	0.3941	0	60.3386	Eukaryota	51859.0	0	Chordata	51859.0	0	Carnivora	51859.0	0	Canidae	51859.0	0	Canis	51859.0	0	Canis lupus	51859.0	0
scf7180000045745	190263	0.4214	0	59.0275	Eukaryota	47112.0	0	Chordata	47112.0	0	Carnivora	47112.0	0	Canidae	47112.0	0	Canis	42275.0	1	Canis lupus	42275.0	1
scf7180000055039	16832	0.4755	0	266.6106	Eukaryota	9447.0	0	Chordata	9447.0	0	Carnivora	9447.0	0	Canidae	9447.0	0	Canis	5691.0	1	Canis lupus	5691.0	1
scf7180000041685	74749	0.3975	0	57.9589	Eukaryota	15825.0	1	Chordata	15825.0	1	Carnivora	14116.0	2	Canidae	14116.0	2	Canis	14116.0	2	Canis lupus	14116.0	2
scf7180000052588	14707	0.3778	0	60.954	Eukaryota	3532.0	1	Chordata	3532.0	1	Carnivora	1313.0	4	Canidae	1313.0	4	Canis	1313.0	4	Canis lupus	1313.0	4
scf7180000042894	617733	0.3649	0	58.6561	Eukaryota	66246.0	0	Chordata	66246.0	0	Carnivora	66246.0	0	Canidae	66246.0	0	Canis	66246.0	0	Canis lupus	66246.0	0
scf7180000053791	3452	0.5041	0	303.4872	Eukaryota	6249.0	0	Chordata	6249.0	0	Carnivora	6249.0	0	Canidae	6249.0	0	Canis	3915.0	1	Canis lupus	2911.0	2
scf7180000051410	8885	0.4506	0	1631.334	Eukaryota	17598.0	0	Chordata	15294.0	2	Gadiformes	9592.0	7	Gadidae	9592.0	7	Gadus	9592.0	7	Gadus morhua	9592.0	7
scf7180000051875	7540	0.4497	0	1771.6739	Eukaryota	1645.0	0	Chordata	1340.0	2	Salmoniformes	1060.0	4	Salmonidae	1060.0	4	Salmo	810.0	5	Salmo trutta	810.0	5
scf7180000054679	142354	0.44	0	148.3548	Eukaryota	72870.0	0	Platyhelminthes	47103.0	1	Strigeidida	35369.0	5	Schistosomatidae	35369.0	5	Schistosoma	35369.0	5	Schistosoma mansoni	35369.0	5
scf7180000052094	3167	0.4373	0	253.4393	no-hit	0.0	0	no-hit	0.0	0	no-hit	0.0	0	no-hit	0.0	0	no-hit	0.0	0	no-hit	0.0	0
scf7180000056479	330377	0.4061	0	60.104	Eukaryota	77724.0	0	Chordata	77724.0	0	Carnivora	77724.0	0	Canidae	77724.0	0	Canis	77724.0	0	Canis lupus	77724.0	0
scf7180000042201	683473	0.3985	0	59.8809	Eukaryota	67646.0	0	Chordata	67646.0	0	Carnivora	67646.0	0	Canidae	67646.0	0	Canis	57978.0	1	Canis lupus	57978.0	1
scf7180000049478	5532	0.4349	0	257.2781	no-hit	0.0	0	no-hit	0.0	0	no-hit	0.0	0	no-hit	0.0	0	no-hit	0.0	0	no-hit	0.0	0
scf7180000043827	340883	0.3933	0	62.2928	Eukaryota	94157.0	0	Chordata	94157.0	0	Carnivora	94157.0	0	Canidae	94157.0	0	Canis	94157.0	0	Canis lupus	94157.0	0
scf7180000048895	11187	0.4403	0	86.3904	no-hit	0.0	0	no-hit	0.0	0	no-hit	0.0	0	no-hit	0.0	0	no-hit	0.0	0	no-hit	0.0	0
scf7180000053944	6385	0.5045	0	56.9749	Eukaryota	6753.0	0	Chordata	6753.0	0	Carnivora	6753.0	0	Canidae	6753.0	0	Canis	6276.0	1	Canis lupus	6276.0	1
scf7180000049456	4755	0.437	0	107.5622	Eukaryota	2707.0	0	Chordata	1536.0	1	Salmoniformes	1536.0	1	Salmonidae	1536.0	1	Protopolystoma	1171.0	2	Protopolystoma xenopodis	1171.0	2
scf7180000049150	6969	0.4391	0	99.6961	Eukaryota	19127.0	1	Chordata	16914.0	2	Gadiformes	6834.0	6	Gadidae	6834.0	6	Gadus	6834.0	6	Gadus morhua	6834.0	6
scf7180000043341	292851	0.3629	0	58.1234	Eukaryota	79941.0	0	Chordata	79941.0	0	Carnivora	79941.0	0	Canidae	79941.0	0	Canis	79941.0	0	Canis lupus	79941.0	0
scf7180000050211	15042	0.4556	0	986.3442	Eukaryota	33117.0	0	Chordata	33117.0	0	Carnivora	33117.0	0	Canidae	33117.0	0	Canis	33117.0	0	Canis lupus	33117.0	0
scf7180000041394	1125386	0.3911	0	60.205	Eukaryota	101802.0	0	Chordata	101802.0	0	Carnivora	101802.0	0	Canidae	101802.0	0	Canis	101802.0	0	Canis lupus	101802.0	0
scf7180000040558	109335	0.4584	0	57.0333	Eukaryota	42119.0	0	Chordata	42119.0	0	Carnivora	42119.0	0	Canidae	14404.0	4	Canis	9617.0	8	Canis lupus	9617.0	8
scf7180000052189	5849	0.4491	0	675.1476	no-hit	0.0	0	no-hit	0.0	0	no-hit	0.0	0	no-hit	0.0	0	no-hit	0.0	0	no-hit	0.0	0
scf7180000053203	3713	0.5009	0	60.9371	Eukaryota	5721.0	0	Chordata	5721.0	0	Carnivora	5721.0	0	Canidae	5721.0	0	Canis	4996.0	1	Canis lupus	4996.0	1
scf7180000048834	13535	0.4454	0	1680.8429	Eukaryota	565.0	0	Platyhelminthes	235.0	2	Polystomatidea	235.0	2	Polystomatidae	235.0	2	Protopolystoma	235.0	2	Protopolystoma xenopodis	235.0	2
scf7180000047185	5635	0.3681	0	37.3818	Eukaryota	12517.0	0	Chordata	12517.0	0	Carnivora	12517.0	0	Canidae	12517.0	0	Canis	12517.0	0	Canis lupus	12517.0	0
scf7180000043220	66890	0.3934	0	59.4681	Eukaryota	92807.0	0	Chordata	92807.0	0	Carnivora	92807.0	0	Canidae	92807.0	0	Canis	92807.0	0	Canis lupus	92807.0	0
scf7180000041710	26297	0.4269	0	52.1683	Eukaryota	41031.0	0	Chordata	41031.0	0	Carnivora	41031.0	0	Canidae	41031.0	0	Canis	41031.0	0	Canis lupus	41031.0	0
scf7180000053096	3206	0.4451	0	345.8481	Eukaryota	2821.0	0	Platyhelminthes	1380.0	3	Polystomatidea	1380.0	3	Polystomatidae	1380.0	3	Protopolystoma	1380.0	3	Protopolystoma xenopodis	1380.0	3
scf7180000045837	208646	0.4556	0	60.5248	Eukaryota	60250.0	0	Chordata	60250.0	0	Carnivora	60250.0	0	Canidae	60250.0	0	Canis	60250.0	0	Canis lupus	60250.0	0
scf7180000049808	30541	0.4539	0	56.6897	Eukaryota	31143.0	0	Chordata	31143.0	0	Carnivora	31143.0	0	Canidae	31143.0	0	Canis	31143.0	0	Canis lupus	31143.0	0
scf7180000045802	170200	0.5504	0	57.715	Eukaryota	35610.0	0	Chordata	35610.0	0	Carnivora	35610.0	0	Canidae	35610.0	0	Canis	32725.0	1	Canis lupus	32725.0	1
scf7180000049012	12753	0.3829	0	91.8813	Eukaryota	55582.0	0	Chordata	55582.0	0	Carnivora	55582.0	0	Canidae	55582.0	0	Canis	55582.0	0	Canis lupus	55582.0	0
scf7180000040930	636201	0.3821	0	58.4708	Eukaryota	41731.0	0	Chordata	41731.0	0	Carnivora	41731.0	0	Canidae	34981.0	1	Canis	34981.0	1	Canis lupus	34981.0	1
scf7180000055745	6029	0.4404	0	230.8469	Eukaryota	974.0	0	Platyhelminthes	568.0	1	Polystomatidea	568.0	1	Polystomatidae	568.0	1	Protopolystoma	568.0	2	Protopolystoma xenopodis	568.0	2
scf7180000048608	4139	0.4501	0	753.1485	Eukaryota	1184.0	0	Platyhelminthes	419.0	2	Polystomatidea	419.0	2	Polystomatidae	419.0	2	Protopolystoma	419.0	2	Protopolystoma xenopodis	419.0	2
scf7180000044512	239033	0.3947	0	59.7853	Eukaryota	17646.0	0	Chordata	17646.0	0	Carnivora	17646.0	0	Canidae	17646.0	0	Canis	17646.0	0	Canis lupus	17646.0	0
scf7180000042441	687727	0.3997	0	60.9604	Eukaryota	57455.0	0	Chordata	57455.0	0	Carnivora	57455.0	0	Canidae	52899.0	1	Canis	41031.0	2	Canis lupus	41031.0	2
scf7180000055459	29399	0.3456	0	139.8631	Eukaryota	7040.0	1	Chordata	7040.0	1	Carnivora	3559.0	3	Canidae	3559.0	3	Vulpes	2228.0	5	Vulpes vulpes	2228.0	5
scf7180000054750	23962	0.4346	0	134.8601	Eukaryota	23727.0	0	Chordata	23727.0	0	Carnivora	23727.0	0	Canidae	23727.0	0	Canis	23727.0	0	Canis lupus	23727.0	0
scf7180000044961	20545	0.4102	0	389.5417	Eukaryota	91122.0	0	Chordata	91122.0	0	Carnivora	91122.0	0	Canidae	91122.0	0	Canis	91122.0	0	Canis lupus	91122.0	0
scf7180000046230	38389	0.4434	0	147.6076	Eukaryota	6466.0	0	Chordata	4635.0	1	Tetraodontiformes	2645.0	4	Tetraodontidae	2645.0	4	Takifugu	2645.0	4	Takifugu rubripes	2645.0	4
scf7180000045044	269184	0.3389	0	59.6715	Eukaryota	57189.0	0	Chordata	57189.0	0	Carnivora	43843.0	1	Canidae	26437.0	3	Canis	26437.0	3	Canis lupus	26437.0	3
scf7180000055391	15165	0.4196	0	138.2939	Eukaryota	6049.0	0	Chordata	6049.0	0	Carnivora	6049.0	0	Felidae	1971.0	5	Felis	1971.0	7	Felis catus	1971.0	7
scf7180000052969	4643	0.4491	0	1091.0885	Eukaryota	1374.0	0	Echinodermata	817.0	2	Forcipulatida	817.0	2	Asteriidae	817.0	2	Asterias	817.0	2	Asterias rubens	817.0	2
scf7180000046316	5547	0.4584	0	85.6135	Eukaryota	1931.0	0	Chordata	1313.0	1	Tetraodontiformes	1100.0	2	Tetraodontidae	1100.0	2	Takifugu	1100.0	2	Takifugu rubripes	1100.0	2
scf7180000049568	8941	0.383	0	99.6372	Eukaryota	68547.0	0	Chordata	68547.0	0	Carnivora	68547.0	0	Canidae	68547.0	0	Canis	68547.0	0	Canis lupus	68547.0	0
scf7180000045045	76008	0.3896	0	58.6336	Eukaryota	8703.0	0	Chordata	8703.0	0	Carnivora	8703.0	0	Canidae	8703.0	0	Canis	8703.0	0	Canis lupus	8703.0	0
scf7180000046468	138580	0.4068	0	66.4074	Eukaryota	50094.0	0	Chordata	50094.0	0	Carnivora	50094.0	0	Canidae	50094.0	0	Canis	50094.0	0	Canis lupus	50094.0	0
scf7180000051825	17658	0.3705	0	30.9173	Eukaryota	19139.0	0	Chordata	19139.0	0	Carnivora	19139.0	0	Canidae	19139.0	0	Canis	19139.0	0	Canis lupus	19139.0	0
scf7180000053829	3027	0.4536	0	366.0417	no-hit	0.0	0	no-hit	0.0	0	no-hit	0.0	0	no-hit	0.0	0	no-hit	0.0	0	no-hit	0.0	0
scf7180000047604	26751	0.4467	0	164.4857	Eukaryota	4652.0	0	Chordata	3675.0	1	Kurtiformes	1802.0	5	Apogonidae	1802.0	5	Sphaeramia	1802.0	5	Sphaeramia orbicularis	1802.0	5
scf7180000054935	20773	0.4453	0	301.2807	Eukaryota	7031.0	0	Chordata	7031.0	0	Tetraodontiformes	4741.0	2	Tetraodontidae	4741.0	2	Takifugu	4741.0	2	Takifugu rubripes	4098.0	3
scf7180000045432	6262	0.4487	0	46.8326	Eukaryota	7221.0	0	Chordata	7221.0	0	Carnivora	5813.0	1	Canidae	5813.0	1	Canis	5813.0	1	Canis lupus	5813.0	1
scf7180000052911	6050	0.4506	0	1009.2802	Eukaryota	2212.0	0	Platyhelminthes	1427.0	1	Polystomatidea	1427.0	1	Polystomatidae	1427.0	1	Protopolystoma	1427.0	1	Protopolystoma xenopodis	1427.0	1
scf7180000050135	4400	0.4377	0	58.8743	Eukaryota	244.0	0	Chordata	244.0	0	Kurtiformes	244.0	0	Apogonidae	244.0	0	Sphaeramia	244.0	0	Sphaeramia orbicularis	244.0	0
scf7180000042074	86190	0.4385	0	56.6281	Eukaryota	84489.0	0	Chordata	84489.0	0	Carnivora	84489.0	0	Canidae	82082.0	1	Canis	82082.0	1	Canis lupus	82082.0	1
scf7180000048368	6429	0.4365	0	215.3912	Eukaryota	3138.0	0	Chordata	3138.0	0	Carnivora	3138.0	0	Canidae	3138.0	0	Canis	3138.0	0	Canis lupus	3138.0	0
scf7180000049165	9706	0.436	0	102.5751	no-hit	0.0	0	no-hit	0.0	0	no-hit	0.0	0	no-hit	0.0	0	no-hit	0.0	0	no-hit	0.0	0
scf7180000050976	19977	0.5034	0	495.6933	Eukaryota	9322.0	0	Chordata	9322.0	0	Carnivora	9322.0	0	Canidae	9322.0	0	Canis	8120.0	1	Canis lupus	6868.0	2
scf7180000043608	75899	0.3438	0	59.1344	Eukaryota	93527.0	0	Chordata	93527.0	0	Carnivora	93527.0	0	Canidae	93527.0	0	Canis	93527.0	0	Canis lupus	93527.0	0
scf7180000042638	491471	0.3791	0	58.6115	Eukaryota	25763.0	0	Chordata	25763.0	0	Carnivora	25763.0	0	Canidae	25763.0	0	Canis	25763.0	0	Canis lupus	25763.0	0
scf7180000047927	28934	0.4168	0	57.4595	Eukaryota	33068.0	0	Chordata	33068.0	0	Carnivora	33068.0	0	Canidae	33068.0	0	Canis	33068.0	0	Canis lupus	33068.0	0
scf7180000043727	3532	0.4499	0	35.069	Eukaryota	34584.0	0	Chordata	34584.0	0	Carnivora	34584.0	0	Canidae	34584.0	0	Canis	34584.0	0	Canis lupus	34584.0	0
scf7180000049762	5559	0.4402	0	102.1867	Eukaryota	664.0	0	Chordata	664.0	0	Kurtiformes	664.0	0	Apogonidae	664.0	0	Sphaeramia	664.0	0	Sphaeramia orbicularis	664.0	0
scf7180000054411	28549	0.4436	0	243.2053	Eukaryota	4627.0	0	Chordata	3597.0	1	Kurtiformes	3177.0	2	Apogonidae	3177.0	2	Sphaeramia	3177.0	2	Sphaeramia orbicularis	3177.0	2
scf7180000046107	11022	0.4416	0	43.9481	Eukaryota	88477.0	0	Chordata	88477.0	0	Carnivora	88477.0	0	Canidae	88477.0	0	Canis	88477.0	0	Canis lupus	88477.0	0
scf7180000041677	1104405	0.3822	100	60.4753	Eukaryota	131824.0	0	Chordata	131824.0	0	Carnivora	131824.0	0	Canidae	131824.0	0	Canis	109349.0	1	Canis lupus	109349.0	1
scf7180000047862	55176	0.488	0	60.3218	Eukaryota	26081.0	0	Chordata	26081.0	0	Carnivora	26081.0	0	Canidae	26081.0	0	Canis	17073.0	1	Canis lupus	17073.0	1
scf7180000044814	279315	0.3824	0	60.3286	Eukaryota	50757.0	0	Chordata	50757.0	0	Carnivora	29735.0	2	Canidae	29735.0	2	Canis	29735.0	2	Canis lupus	29735.0	2
scf7180000047683	67893	0.5788	0	58.283	Eukaryota	3161.0	0	Chordata	3161.0	0	Carnivora	3161.0	0	Canidae	3161.0	0	Canis	3161.0	0	Canis lupus	3161.0	0
scf7180000048627	46696	0.4471	0	236.4704	Eukaryota	8675.0	0	Chordata	6312.0	2	Tetraodontiformes	4911.0	4	Tetraodontidae	4911.0	4	Takifugu	4911.0	4	Takifugu rubripes	4911.0	4
scf7180000047163	85014	0.5183	0	57.5768	Eukaryota	11958.0	0	Chordata	11958.0	0	Carnivora	11958.0	0	Canidae	11958.0	0	Canis	11958.0	0	Canis lupus	11958.0	0
scf7180000041299	403866	0.3818	0	60.0485	Eukaryota	86176.0	0	Chordata	86176.0	0	Carnivora	86176.0	0	Canidae	86176.0	0	Canis	86176.0	0	Canis lupus	86176.0	0
scf7180000049284	36282	0.372	0	59.7723	Eukaryota	5036.0	0	Chordata	5036.0	0	Primates	2808.0	2	Hominidae	2808.0	3	Homo	1990.0	4	Homo sapiens	1990.0	4
scf7180000042342	517757	0.3895	0	58.1337	Eukaryota	91958.0	0	Chordata	91958.0	0	Carnivora	91958.0	0	Canidae	91958.0	0	Canis	91958.0	0	Canis lupus	91958.0	0
scf7180000043089	281728	0.5321	0	59.0771	Eukaryota	55017.0	0	Chordata	55017.0	0	Carnivora	55017.0	0	Canidae	28255.0	2	Panthera	23301.0	3	Panthera pardus	23301.0	3
scf7180000041343	1140675	0.394	0	59.2296	Eukaryota	107945.0	0	Chordata	107945.0	0	Carnivora	107945.0	0	Canidae	107945.0	0	Canis	107945.0	0	Canis lupus	107945.0	0
scf7180000046176	125774	0.3516	0	58.8187	Eukaryota	86021.0	0	Chordata	86021.0	0	Carnivora	86021.0	0	Canidae	86021.0	0	Canis	86021.0	0	Canis lupus	86021.0	0
scf7180000044027	377753	0.4989	0	56.5697	Eukaryota	30164.0	0	Chordata	30164.0	0	Carnivora	30164.0	0	Canidae	30164.0	0	Canis	27026.0	1	Canis lupus	27026.0	1
scf7180000052108	10375	0.4376	0	349.8835	Eukaryota	1966.0	0	Platyhelminthes	755.0	2	Polystomatidea	755.0	2	Polystomatidae	755.0	2	Protopolystoma	755.0	2	Protopolystoma xenopodis	755.0	2
scf7180000043746	32064	0.4206	0	64.1821	Eukaryota	8021.0	0	Chordata	8021.0	0	Carnivora	8021.0	0	Canidae	8021.0	0	Canis	8021.0	0	Canis lupus	8021.0	0
scf7180000051770	10850	0.4377	0	246.5236	Eukaryota	58264.0	0	Chordata	58264.0	0	Carnivora	58264.0	0	Canidae	58264.0	0	Canis	58264.0	0	Canis lupus	58264.0	0
scf7180000049623	19924	0.4448	0	167.2074	Eukaryota	5786.0	0	Chordata	4225.0	2	Blenniiformes	2030.0	7	Gobiesocidae	2030.0	7	Gouania	2030.0	7	Gouania willdenowi	2030.0	7
scf7180000042507	339342	0.4265	0	63.7402	Eukaryota	95026.0	0	Chordata	95026.0	0	Carnivora	95026.0	0	Canidae	95026.0	0	Canis	95026.0	0	Canis lupus	95026.0	0
scf7180000053272	2813	0.4486	0	361.9278	no-hit	0.0	0	no-hit	0.0	0	no-hit	0.0	0	no-hit	0.0	0	no-hit	0.0	0	no-hit	0.0	0
scf7180000043382	247438	0.4055	0	60.1165	Eukaryota	106188.0	0	Chordata	106188.0	0	Carnivora	106188.0	0	Canidae	106188.0	0	Canis	106188.0	0	Canis lupus	106188.0	0
scf7180000053044	13632	0.4448	0	90.7575	no-hit	0.0	0	no-hit	0.0	0	no-hit	0.0	0	no-hit	0.0	0	no-hit	0.0	0	no-hit	0.0	0
scf7180000041589	536317	0.4177	0	59.5887	Eukaryota	56668.0	0	Chordata	56668.0	0	Carnivora	51923.0	1	Canidae	43390.0	2	Canis	33295.0	4	Canis lupus	33295.0	4
scf7180000043648	34516	0.4327	0	60.418	Eukaryota	87277.0	0	Chordata	87277.0	0	Carnivora	87277.0	0	Canidae	87277.0	0	Canis	87277.0	0	Canis lupus	87277.0	0
scf7180000052801	2270	0.452	0	518.8884	no-hit	0.0	0	no-hit	0.0	0	no-hit	0.0	0	no-hit	0.0	0	no-hit	0.0	0	no-hit	0.0	0
scf7180000054922	25008	0.3852	0	307.0631	Eukaryota	13897.0	0	Chordata	13897.0	0	Carnivora	13897.0	0	Canidae	13897.0	0	Canis	13897.0	0	Canis lupus	13897.0	0
scf7180000051733	29882	0.5097	0	48.4132	Eukaryota	26341.0	0	Chordata	26341.0	0	Carnivora	26341.0	0	Canidae	26341.0	0	Canis	23724.0	1	Canis lupus	23724.0	1
scf7180000049739	19687	0.4458	0	56.9487	Eukaryota	24217.0	0	Platyhelminthes	12970.0	2	Cyclophyllidea	7699.0	8	Hymenolepididae	7699.0	8	Hymenolepis	7699.0	8	Hymenolepis microstoma	7699.0	8
scf7180000043639	481457	0.4766	0	58.093	Eukaryota	33777.0	0	Chordata	33777.0	0	Carnivora	33777.0	0	Canidae	15372.0	2	Canis	11534.0	5	Canis lupus	11534.0	5
scf7180000051544	19952	0.6097	0	59.4659	Eukaryota	15239.0	0	Chordata	15239.0	0	Carnivora	15239.0	0	Canidae	15239.0	0	Canis	14003.0	1	Canis lupus	14003.0	1
scf7180000043812	430036	0.4241	0	60.1259	Eukaryota	37747.0	0	Chordata	37747.0	0	Carnivora	37747.0	0	Canidae	37747.0	0	Canis	34775.0	1	Canis lupus	34775.0	1
scf7180000046337	53351	0.4388	0	134.5207	Eukaryota	9685.0	0	Chordata	7445.0	1	Kurtiformes	2586.0	4	Apogonidae	2586.0	4	Sphaeramia	2586.0	4	Sphaeramia orbicularis	2586.0	4
scf7180000052818	9466	0.4394	0	558.7155	no-hit	0.0	0	no-hit	0.0	0	no-hit	0.0	0	no-hit	0.0	0	no-hit	0.0	0	no-hit	0.0	0
scf7180000047084	9782	0.4386	0	80.5367	Eukaryota	4067.0	1	Chordata	2458.0	2	Polystomatidea	1609.0	6	Polystomatidae	1609.0	6	Protopolystoma	1609.0	6	Protopolystoma xenopodis	1609.0	6
scf7180000048560	71292	0.402	0	62.4466	Eukaryota	34164.0	0	Chordata	34164.0	0	Carnivora	34164.0	0	Canidae	22565.0	3	Canis	18821.0	4	Canis lupus	18821.0	5
scf7180000045102	272976	0.3911	0	59.1428	Eukaryota	61021.0	0	Chordata	61021.0	0	Carnivora	61021.0	0	Canidae	61021.0	0	Canis	51745.0	1	Canis lupus	51745.0	1
scf7180000043130	233714	0.4272	0	60.0275	Eukaryota	32359.0	0	Chordata	32359.0	0	Carnivora	32359.0	0	Canidae	29363.0	1	Canis	25399.0	2	Canis lupus	25399.0	2
scf7180000042467	115152	0.3409	0	57.804	Eukaryota	83040.0	0	Chordata	83040.0	0	Carnivora	83040.0	0	Canidae	83040.0	0	Canis	83040.0	0	Canis lupus	83040.0	0
scf7180000050928	29360	0.5039	0	724.786	Eukaryota	9587.0	0	Chordata	9587.0	0	Carnivora	9587.0	0	Canidae	9587.0	0	Canis	7774.0	1	Canis lupus	6464.0	2
scf7180000042673	87504	0.3423	0	60.4392	Eukaryota	93271.0	0	Chordata	93271.0	0	Carnivora	93271.0	0	Canidae	93271.0	0	Canis	93271.0	0	Canis lupus	93271.0	0
scf7180000042424	339428	0.3448	0	58.8371	Eukaryota	85704.0	0	Chordata	85704.0	0	Carnivora	85704.0	0	Canidae	85704.0	0	Canis	85704.0	0	Canis lupus	85704.0	0
scf7180000053085	3658	0.4497	0	712.3628	no-hit	0.0	0	no-hit	0.0	0	no-hit	0.0	0	no-hit	0.0	0	no-hit	0.0	0	no-hit	0.0	0
scf7180000042030	675756	0.3943	0	59.369	Eukaryota	50768.0	0	Chordata	50768.0	0	Carnivora	50768.0	0	Canidae	50768.0	0	Canis	50768.0	0	Canis lupus	50768.0	0
scf7180000043092	472369	0.3714	0	58.9154	Eukaryota	40779.0	0	Chordata	40779.0	0	Carnivora	40779.0	0	Canidae	40779.0	0	Canis	40779.0	0	Canis lupus	40779.0	0
scf7180000053711	3478	0.4948	0	254.1203	Eukaryota	5182.0	0	Chordata	5182.0	0	Carnivora	5182.0	0	Canidae	5182.0	0	Canis	4478.0	1	Canis lupus	4478.0	1
scf7180000056234	1262501	0.3493	0	59.1829	Eukaryota	94082.0	0	Chordata	94082.0	0	Carnivora	94082.0	0	Canidae	94082.0	0	Canis	94082.0	0	Canis lupus	94082.0	0
scf7180000050027	7862	0.4359	0	134.9579	Eukaryota	4156.0	0	Chordata	2458.0	1	Polystomatidea	1100.0	6	Polystomatidae	1100.0	6	Protopolystoma	1100.0	6	Protopolystoma xenopodis	1100.0	6
scf7180000047625	18314	0.4356	0	157.3542	Eukaryota	2367.0	0	Chordata	1650.0	1	Tetraodontiformes	880.0	4	Tetraodontidae	880.0	4	Takifugu	880.0	4	Takifugu rubripes	880.0	4
scf7180000042529	687292	0.4785	0	58.1495	Eukaryota	42816.0	0	Chordata	42816.0	0	Carnivora	42816.0	0	Canidae	39366.0	1	Canis	39366.0	1	Canis lupus	39366.0	1
scf7180000052945	2880	0.4524	0	660.0321	no-hit	0.0	0	no-hit	0.0	0	no-hit	0.0	0	no-hit	0.0	0	no-hit	0.0	0	no-hit	0.0	0
scf7180000041259	1113931	0.3779	0	60.261	Eukaryota	63729.0	0	Chordata	63729.0	0	Carnivora	63729.0	0	Canidae	51645.0	2	Canis	45068.0	3	Canis lupus	45068.0	3
scf7180000051686	2987	0.4412	0	575.7552	Eukaryota	1428.0	0	Chordata	1428.0	0	Columbiformes	462.0	3	Columbidae	462.0	3	Streptopelia	462.0	3	Streptopelia turtur	462.0	3
scf7180000055190	18937	0.5191	0	1155.3709	Eukaryota	16134.0	0	Chordata	16134.0	0	Carnivora	16134.0	0	Canidae	16134.0	0	Canis	16134.0	0	Canis lupus	16134.0	0
scf7180000045884	155721	0.4628	0	61.5875	Eukaryota	17214.0	0	Chordata	17214.0	0	Carnivora	6351.0	3	Canidae	6351.0	4	Homo	5162.0	5	Homo sapiens	5162.0	5
scf7180000041873	899579	0.3634	0	60.1498	Eukaryota	82577.0	0	Chordata	82577.0	0	Carnivora	82577.0	0	Canidae	82577.0	0	Canis	82577.0	0	Canis lupus	82577.0	0
scf7180000042047	911440	0.4943	0	59.396	Eukaryota	74730.0	0	Chordata	74730.0	0	Carnivora	74730.0	0	Canidae	74730.0	0	Canis	74730.0	0	Canis lupus	74730.0	0
scf7180000048477	69942	0.4443	0	59.6449	Eukaryota	56384.0	0	Chordata	56384.0	0	Carnivora	56384.0	0	Canidae	56384.0	0	Vulpes	34124.0	1	Vulpes vulpes	34124.0	1
scf7180000040619	2032426	0.4362	0	60.0711	Eukaryota	89981.0	0	Chordata	89981.0	0	Carnivora	89981.0	0	Canidae	89981.0	0	Canis	89981.0	0	Canis lupus	89981.0	0
scf7180000055298	24076	0.4389	0	324.2511	Eukaryota	1513.0	0	Platyhelminthes	913.0	1	Polystomatidea	913.0	3	Polystomatidae	913.0	3	Protopolystoma	913.0	3	Protopolystoma xenopodis	913.0	3
scf7180000045337	3851	0.4536	0	188.8962	no-hit	0.0	0	no-hit	0.0	0	no-hit	0.0	0	no-hit	0.0	0	no-hit	0.0	0	no-hit	0.0	0
scf7180000045286	54794	0.4454	0	100.1902	Eukaryota	67488.0	0	Chordata	67488.0	0	Carnivora	67488.0	0	Canidae	67488.0	0	Canis	67488.0	0	Canis lupus	67488.0	0
scf7180000047018	99169	0.3682	0	60.7361	Eukaryota	7191.0	0	Chordata	7191.0	0	Carnivora	6437.0	1	Felidae	5616.0	2	Felis	5616.0	2	Felis catus	5616.0	2
scf7180000042358	768813	0.3736	0	59.2367	Eukaryota	57440.0	0	Chordata	57440.0	0	Carnivora	57440.0	0	Canidae	57440.0	0	Canis	57440.0	0	Canis lupus	57440.0	0
scf7180000041750	895872	0.3713	0	60.9588	Eukaryota	59707.0	0	Chordata	59707.0	0	Carnivora	59707.0	0	Canidae	59707.0	0	Canis	59707.0	0	Canis lupus	59707.0	0
scf7180000054288	22826	0.4255	0	433.0602	Eukaryota	8191.0	0	Chordata	8191.0	0	Primates	4863.0	2	Hominidae	3692.0	3	Homo	3692.0	4	Homo sapiens	3692.0	4
scf7180000056583	33614	0.3875	0	74.3944	Eukaryota	61907.0	0	Chordata	61907.0	0	Carnivora	61907.0	0	Canidae	61907.0	0	Canis	61907.0	0	Canis lupus	61907.0	0
scf7180000056557	125908	0.5342	0	57.0449	Eukaryota	19602.0	0	Chordata	19602.0	0	Carnivora	19602.0	0	Canidae	19602.0	0	Canis	19602.0	0	Canis lupus	19602.0	0
scf7180000050391	3763	0.4459	0	389.1514	no-hit	0.0	0	no-hit	0.0	0	no-hit	0.0	0	no-hit	0.0	0	no-hit	0.0	0	no-hit	0.0	0
scf7180000041168	1195133	0.4583	0	58.4406	Eukaryota	90746.0	0	Chordata	90746.0	0	Carnivora	90746.0	0	Canidae	90746.0	0	Canis	90746.0	0	Canis lupus	90746.0	0
scf7180000044669	257233	0.3544	0	59.1581	Eukaryota	19911.0	0	Chordata	19911.0	0	Carnivora	19911.0	0	Canidae	19911.0	0	Canis	19911.0	0	Canis lupus	19911.0	0
scf7180000051028	4305	0.5094	0	58.1486	Eukaryota	7965.0	0	Chordata	7965.0	0	Carnivora	7965.0	0	Canidae	7965.0	0	Canis	6358.0	1	Canis lupus	5181.0	2
scf7180000055919	16328	0.4331	0	172.6287	Eukaryota	14883.0	0	Chordata	8242.0	2	Gadiformes	4471.0	6	Gadidae	4471.0	6	Gadus	4471.0	6	Gadus morhua	4471.0	6
scf7180000054728	249604	0.3657	0	59.7658	Eukaryota	89017.0	0	Chordata	89017.0	0	Carnivora	89017.0	0	Canidae	89017.0	0	Canis	89017.0	0	Canis lupus	89017.0	0
scf7180000054450	14334	0.4399	0	109.7948	Eukaryota	7295.0	0	Platyhelminthes	2783.0	2	Polystomatidea	2783.0	4	Polystomatidae	2783.0	4	Protopolystoma	2783.0	4	Protopolystoma xenopodis	2783.0	4
scf7180000045493	5878	0.4388	0	103.9455	no-hit	0.0	0	no-hit	0.0	0	no-hit	0.0	0	no-hit	0.0	0	no-hit	0.0	0	no-hit	0.0	0
scf7180000043226	39267	0.557	0	141.7624	Eukaryota	83823.0	0	Chordata	83823.0	0	Carnivora	83823.0	0	Canidae	83823.0	0	Canis	83823.0	0	Canis lupus	83823.0	0
scf7180000053787	2678	0.4473	0	296.9964	no-hit	0.0	0	no-hit	0.0	0	no-hit	0.0	0	no-hit	0.0	0	no-hit	0.0	0	no-hit	0.0	0
scf7180000051477	9219	0.4443	0	68.5475	Eukaryota	337.0	0	Chordata	337.0	0	Tetraodontiformes	337.0	0	Tetraodontidae	337.0	0	Takifugu	337.0	0	Takifugu rubripes	337.0	0
scf7180000049994	7333	0.4346	0	256.7404	Eukaryota	1416.0	1	Chordata	1229.0	2	Columbiformes	1042.0	3	Columbidae	1042.0	3	Streptopelia	1042.0	3	Streptopelia turtur	1042.0	3
scf7180000056000	5828	0.4384	0	297.2995	no-hit	0.0	0	no-hit	0.0	0	no-hit	0.0	0	no-hit	0.0	0	no-hit	0.0	0	no-hit	0.0	0
scf7180000042536	286782	0.4115	0	60.1751	Eukaryota	20499.0	0	Chordata	20499.0	0	Carnivora	20499.0	0	Canidae	20499.0	0	Canis	20499.0	0	Canis lupus	20499.0	0
scf7180000041957	834972	0.4372	0	61.3387	Eukaryota	56848.0	0	Chordata	56848.0	0	Carnivora	56848.0	0	Canidae	56848.0	0	Canis	56848.0	0	Canis lupus	56848.0	0
scf7180000041764	5406	0.4145	0	28.5922	Eukaryota	6572.0	0	Chordata	6572.0	0	Carnivora	6572.0	0	Canidae	6572.0	0	Canis	6263.0	1	Canis lupus	6263.0	1
scf7180000040883	782447	0.6327	0	55.1234	Eukaryota	68021.0	0	Chordata	68021.0	0	Carnivora	68021.0	0	Canidae	68021.0	0	Canis	48211.0	1	Canis lupus	48211.0	1
scf7180000044545	671654	0.346	100	59.503	Eukaryota	75653.0	1	Chordata	75653.0	1	Primates	27463.0	4	Bovidae	22750.0	5	unresolved	19826.0	6	unresolved	19826.0	7
scf7180000046368	5367	0.4399	0	145.9393	Eukaryota	390.0	0	Platyhelminthes	390.0	0	Polystomatidea	390.0	0	Polystomatidae	390.0	0	Protopolystoma	390.0	0	Protopolystoma xenopodis	390.0	0
scf7180000047734	34382	0.445	0	217.0552	Eukaryota	3074.0	0	Chordata	3074.0	0	Carnivora	3074.0	0	Canidae	3074.0	0	Canis	3074.0	0	Canis lupus	3074.0	0
scf7180000041676	869360	0.4878	0	59.7284	Eukaryota	56238.0	0	Chordata	56238.0	0	Carnivora	56238.0	0	Canidae	56238.0	0	Canis	41869.0	1	Canis lupus	41869.0	1
scf7180000040881	829585	0.4175	0	59.1647	Eukaryota	90244.0	0	Chordata	90244.0	0	Carnivora	90244.0	0	Canidae	90244.0	0	Canis	90244.0	0	Canis lupus	90244.0	0
scf7180000043308	498520	0.3846	0	59.2665	Eukaryota	35299.0	0	Chordata	35299.0	0	Carnivora	35299.0	0	Canidae	35299.0	0	Canis	35299.0	0	Canis lupus	35299.0	0
scf7180000041743	284947	0.3736	0	57.8285	Eukaryota	93312.0	0	Chordata	93312.0	0	Carnivora	93312.0	0	Canidae	93312.0	0	Canis	93312.0	0	Canis lupus	93312.0	0
scf7180000051356	7921	0.445	0	331.079	no-hit	0.0	0	no-hit	0.0	0	no-hit	0.0	0	no-hit	0.0	0	no-hit	0.0	0	no-hit	0.0	0
scf7180000056577	81779	0.4213	0	59.8416	Eukaryota	28265.0	0	Chordata	28265.0	0	Carnivora	28265.0	0	Canidae	11781.0	3	Canis	7823.0	6	Canis lupus	7823.0	6
scf7180000042392	228834	0.3985	0	60.0835	Eukaryota	39742.0	1	Chordata	39742.0	1	Carnivora	33373.0	3	Canidae	33373.0	3	Canis	30109.0	4	Canis lupus	30109.0	4
scf7180000042598	19566	0.4279	0	50.8506	Eukaryota	55806.0	0	Chordata	55806.0	0	Carnivora	55806.0	0	Canidae	55806.0	0	Canis	55806.0	0	Canis lupus	55806.0	0
scf7180000046760	106326	0.3549	0	58.0722	Eukaryota	27087.0	0	Chordata	27087.0	0	Carnivora	27087.0	0	Canidae	24388.0	1	Canis	24388.0	1	Canis lupus	24388.0	1
scf7180000050187	2974	0.4475	0	480.7996	Eukaryota	1197.0	0	Platyhelminthes	709.0	1	Polystomatidea	709.0	1	Polystomatidae	709.0	1	Protopolystoma	709.0	1	Protopolystoma xenopodis	709.0	1
scf7180000041042	102823	0.3669	0	59.8532	Eukaryota	69965.0	0	Chordata	69965.0	0	Carnivora	69965.0	0	Canidae	69965.0	0	Canis	69965.0	0	Canis lupus	69965.0	0
scf7180000056196	1454336	0.3869	0	60.964	Eukaryota	86980.0	0	Chordata	86980.0	0	Carnivora	86980.0	0	Canidae	86980.0	0	Canis	86980.0	0	Canis lupus	86980.0	0
scf7180000044187	5576	0.4437	0	222.534	Eukaryota	13034.0	0	Chordata	13034.0	0	Carnivora	13034.0	0	Canidae	13034.0	0	Canis	13034.0	0	Canis lupus	13034.0	0
scf7180000045447	29160	0.4341	0	49.4111	Eukaryota	2778.0	0	Chordata	2778.0	0	Carnivora	2778.0	0	Canidae	2778.0	0	Canis	2526.0	1	Canis lupus	2526.0	1
scf7180000043664	397286	0.3817	0	59.8545	Eukaryota	67506.0	0	Chordata	67506.0	0	Carnivora	67506.0	0	Canidae	67506.0	0	Vulpes	40734.0	1	Vulpes vulpes	40734.0	1
scf7180000044588	35707	0.4886	0	50.6378	Eukaryota	23125.0	0	Chordata	23125.0	0	Carnivora	23125.0	0	Canidae	23125.0	0	Canis	19858.0	1	Canis lupus	19858.0	1
scf7180000049142	14500	0.4458	0	150.7829	no-hit	0.0	0	no-hit	0.0	0	no-hit	0.0	0	no-hit	0.0	0	no-hit	0.0	0	no-hit	0.0	0
scf7180000046302	19889	0.4381	0	68.4791	Eukaryota	46097.0	0	Chordata	31791.0	2	Gadiformes	25613.0	5	Gadidae	25613.0	5	Gadus	25613.0	5	Gadus morhua	25613.0	5
scf7180000043956	182602	0.5309	0	55.9577	Eukaryota	27178.0	0	Chordata	27178.0	0	Carnivora	27178.0	0	Canidae	27178.0	0	Canis	27178.0	0	Canis lupus	27178.0	0
scf7180000046798	17238	0.4434	0	130.5694	Eukaryota	91663.0	0	Chordata	91663.0	0	Carnivora	91663.0	0	Canidae	91663.0	0	Canis	91663.0	0	Canis lupus	91663.0	0
scf7180000053393	18967	0.505	0	123.3247	Eukaryota	8809.0	0	Chordata	8809.0	0	Carnivora	8809.0	0	Canidae	8809.0	0	Canis	7048.0	1	Canis lupus	5830.0	2
scf7180000053209	5723	0.4529	0	519.9358	no-hit	0.0	0	no-hit	0.0	0	no-hit	0.0	0	no-hit	0.0	0	no-hit	0.0	0	no-hit	0.0	0
scf7180000047499	96698	0.576	0	56.9033	Eukaryota	33023.0	0	Chordata	33023.0	0	Carnivora	33023.0	0	Canidae	31113.0	1	Canis	17344.0	2	Canis lupus	17344.0	2
scf7180000043039	509369	0.4308	0	59.053	Eukaryota	153515.0	0	Chordata	153515.0	0	Carnivora	153515.0	0	Canidae	153515.0	0	Canis	121463.0	1	Canis lupus	121463.0	1
scf7180000041587	453061	0.3838	0	59.2982	Eukaryota	36368.0	0	Chordata	36368.0	0	Carnivora	36368.0	0	Canidae	36368.0	0	Canis	36368.0	0	Canis lupus	36368.0	0
scf7180000050616	8717	0.4511	0	561.7956	no-hit	0.0	0	no-hit	0.0	0	no-hit	0.0	0	no-hit	0.0	0	no-hit	0.0	0	no-hit	0.0	0
scf7180000044815	8192	0.4023	0	29.2237	Eukaryota	3310.0	0	Chordata	3310.0	0	Carnivora	3310.0	0	Canidae	3310.0	0	Canis	3310.0	0	Canis lupus	3310.0	0
scf7180000044271	12418	0.4146	0	45.8493	Eukaryota	30758.0	0	Chordata	30758.0	0	Carnivora	30758.0	0	Canidae	30758.0	0	Canis	30758.0	0	Canis lupus	30758.0	0
scf7180000047312	37024	0.4401	0	101.9112	no-hit	0.0	0	no-hit	0.0	0	no-hit	0.0	0	no-hit	0.0	0	no-hit	0.0	0	no-hit	0.0	0
scf7180000044805	37236	0.4377	0	177.497	Eukaryota	28491.0	0	Chordata	28491.0	0	Gadiformes	18623.0	5	Gadidae	18623.0	5	Gadus	18623.0	5	Gadus morhua	18623.0	5
scf7180000052560	3815	0.4495	0	200.0575	Eukaryota	1491.0	0	Echinodermata	797.0	2	Forcipulatida	797.0	2	Asteriidae	797.0	2	Asterias	797.0	2	Asterias rubens	797.0	2
scf7180000041503	477327	0.3848	0	58.9015	Eukaryota	55407.0	0	Chordata	55407.0	0	Carnivora	55407.0	0	Canidae	55407.0	0	Canis	55407.0	0	Canis lupus	55407.0	0
scf7180000041802	31486	0.415	0	57.947	Eukaryota	81273.0	0	Chordata	81273.0	0	Carnivora	81273.0	0	Canidae	81273.0	0	Canis	81273.0	0	Canis lupus	81273.0	0
scf7180000042600	36400	0.4364	0	55.1712	Eukaryota	57719.0	0	Chordata	57719.0	0	Carnivora	57719.0	0	Canidae	57719.0	0	Canis	57719.0	0	Canis lupus	57719.0	0
scf7180000056420	405694	0.4242	0	61.1483	Eukaryota	88056.0	0	Chordata	88056.0	0	Carnivora	88056.0	0	Canidae	88056.0	0	Canis	67598.0	1	Canis lupus	67598.0	1
scf7180000054957	23208	0.4454	0	239.6208	Eukaryota	2058.0	0	Chordata	2058.0	0	Anabantiformes	976.0	3	Anabantidae	976.0	3	Anabas	976.0	3	Anabas testudineus	976.0	3
scf7180000044411	370124	0.3433	0	59.4385	Eukaryota	22675.0	0	Chordata	22675.0	0	Carnivora	22675.0	0	Canidae	22675.0	0	Canis	22675.0	0	Canis lupus	22675.0	0
scf7180000041902	543076	0.4737	0	57.8264	Eukaryota	37072.0	0	Chordata	37072.0	0	Carnivora	37072.0	0	Canidae	37072.0	0	Canis	37072.0	0	Canis lupus	37072.0	0
scf7180000050295	9812	0.4409	0	70.5044	no-hit	0.0	0	no-hit	0.0	0	no-hit	0.0	0	no-hit	0.0	0	no-hit	0.0	0	no-hit	0.0	0
scf7180000040598	2136866	0.4093	0	59.9941	Eukaryota	64832.0	0	Chordata	64832.0	0	Carnivora	64832.0	0	Canidae	64832.0	0	Canis	52283.0	1	Canis lupus	52283.0	1
scf7180000051594	35140	0.4247	0	54.1319	Eukaryota	39073.0	0	Chordata	39073.0	0	Carnivora	39073.0	0	Canidae	39073.0	0	Canis	39073.0	0	Canis lupus	39073.0	0
scf7180000045817	162869	0.4011	0	59.4981	Eukaryota	57557.0	0	Chordata	57557.0	0	Carnivora	57557.0	0	Canidae	57557.0	0	Canis	57557.0	0	Canis lupus	57557.0	0
scf7180000050459	10388	0.4396	0	197.2176	Eukaryota	4700.0	0	Chordata	4259.0	2	Kurtiformes	2444.0	4	Apogonidae	2444.0	4	Sphaeramia	2444.0	4	Sphaeramia orbicularis	2444.0	4
scf7180000046872	17490	0.493	0	158.5485	Eukaryota	90725.0	0	Chordata	90725.0	0	Carnivora	90725.0	0	Canidae	90725.0	0	Canis	90725.0	0	Canis lupus	90725.0	0
scf7180000053973	5376	0.3093	0	62.6585	Eukaryota	143.0	0	Chordata	143.0	0	Carnivora	143.0	0	Canidae	143.0	0	Canis	143.0	0	Canis lupus	143.0	0
scf7180000051554	3489	0.4494	0	397.0767	no-hit	0.0	0	no-hit	0.0	0	no-hit	0.0	0	no-hit	0.0	0	no-hit	0.0	0	no-hit	0.0	0
scf7180000044466	282423	0.5219	0	60.2111	Eukaryota	43530.0	0	Chordata	43530.0	0	Carnivora	43530.0	0	Canidae	43530.0	0	Canis	34780.0	1	Canis lupus	34780.0	1
scf7180000041183	1265344	0.3756	0	59.7498	Eukaryota	93211.0	0	Chordata	93211.0	0	Carnivora	93211.0	0	Canidae	93211.0	0	Canis	93211.0	0	Canis lupus	93211.0	0
scf7180000045436	722299	0.3818	0	61.0398	Eukaryota	94993.0	0	Chordata	94993.0	0	Carnivora	94993.0	0	Canidae	94993.0	0	Canis	94993.0	0	Canis lupus	94993.0	0
scf7180000041932	119309	0.3871	0	58.8238	Eukaryota	24325.0	0	Chordata	24325.0	0	Carnivora	21734.0	1	Canidae	21734.0	1	Canis	15420.0	2	Canis lupus	15420.0	2
scf7180000051914	2655	0.4554	0	889.0537	no-hit	0.0	0	no-hit	0.0	0	no-hit	0.0	0	no-hit	0.0	0	no-hit	0.0	0	no-hit	0.0	0
scf7180000056606	2199252	0.3625	0	60.3855	Eukaryota	92312.0	0	Chordata	92312.0	0	Carnivora	92312.0	0	Canidae	92312.0	0	Canis	92312.0	0	Canis lupus	92312.0	0
scf7180000045836	5920	0.5404	0	34.8349	Eukaryota	13670.0	0	Chordata	13670.0	0	Carnivora	13341.0	1	Canidae	13341.0	1	Canis	13341.0	1	Canis lupus	13341.0	1
scf7180000044571	297392	0.4899	0	59.164	Eukaryota	46637.0	0	Chordata	46637.0	0	Carnivora	46637.0	0	Canidae	24818.0	3	Canis	18507.0	6	Canis lupus	18507.0	6
scf7180000042032	100209	0.3623	0	60.3083	Eukaryota	21608.0	0	Chordata	21608.0	0	Primates	8174.0	3	Hominidae	6812.0	4	Homo	6812.0	6	Homo sapiens	6812.0	6
scf7180000055418	15458	0.4462	0	392.8605	no-hit	0.0	0	no-hit	0.0	0	no-hit	0.0	0	no-hit	0.0	0	no-hit	0.0	0	no-hit	0.0	0
scf7180000046066	159778	0.4013	0	59.3038	Eukaryota	41128.0	0	Chordata	41128.0	0	Carnivora	41128.0	0	Canidae	41128.0	0	Canis	24684.0	1	Canis lupus	24684.0	1
scf7180000046892	49006	0.4542	0	102.7523	Eukaryota	409.0	0	Platyhelminthes	409.0	0	Polystomatidea	409.0	0	Polystomatidae	409.0	0	Protopolystoma	409.0	0	Protopolystoma xenopodis	409.0	0
scf7180000055033	41683	0.4384	0	218.3851	Eukaryota	7159.0	0	Chordata	5402.0	1	Tetraodontiformes	4764.0	2	Tetraodontidae	4764.0	2	Takifugu	4764.0	2	Takifugu rubripes	4764.0	2
scf7180000049480	12460	0.4476	0	996.1797	Eukaryota	502.0	0	Streptophyta	502.0	0	Fabales	502.0	0	Fabaceae	502.0	0	Cicer	502.0	0	Cicer arietinum	502.0	0
scf7180000041090	57754	0.3601	0	57.832	Eukaryota	82151.0	0	Chordata	82151.0	0	Carnivora	82151.0	0	Canidae	82151.0	0	Canis	82151.0	0	Canis lupus	82151.0	0
scf7180000047580	80242	0.4834	0	57.7304	Eukaryota	16007.0	0	Chordata	16007.0	0	Carnivora	16007.0	0	Canidae	16007.0	0	Canis	16007.0	0	Canis lupus	16007.0	0
scf7180000040803	598600	0.4129	0	60.1973	Eukaryota	63596.0	0	Chordata	63596.0	0	Carnivora	63596.0	0	Canidae	56049.0	1	Canis	50263.0	3	Canis lupus	50263.0	3
scf7180000040845	1880481	0.4021	0	61.3066	Eukaryota	75585.0	0	Chordata	75585.0	0	Carnivora	75585.0	0	Canidae	75585.0	0	Canis	69538.0	1	Canis lupus	69538.0	1
scf7180000047030	118432	0.4281	0	59.4044	Eukaryota	18725.0	0	Chordata	18725.0	0	Primates	9853.0	4	Hominidae	9853.0	4	Pan	5481.0	5	Pan troglodytes	5481.0	5
scf7180000054768	14389	0.4454	0	326.136	Eukaryota	9032.0	0	Chordata	9032.0	0	Tetraodontiformes	5040.0	2	Tetraodontidae	5040.0	2	Takifugu	5040.0	2	Takifugu rubripes	4364.0	3
scf7180000055130	102359	0.4492	0	74.5579	Eukaryota	46306.0	0	Chordata	46306.0	0	Carnivora	46306.0	0	Canidae	46306.0	0	Canis	41968.0	1	Canis lupus	41968.0	1
scf7180000055862	6556	0.4524	0	1956.0011	Eukaryota	2878.0	0	Chordata	2303.0	1	Carnivora	2303.0	1	Canidae	2303.0	1	Canis	2303.0	1	Canis lupus	2303.0	1
scf7180000056426	346120	0.3882	0	61.159	Eukaryota	43637.0	0	Chordata	43637.0	0	Carnivora	43637.0	0	Canidae	28101.0	1	Canis	28101.0	1	Canis lupus	28101.0	1
scf7180000056346	541934	0.3832	0	59.5652	Eukaryota	28102.0	0	Chordata	28102.0	0	Carnivora	28102.0	0	Canidae	28102.0	0	Canis	28102.0	0	Canis lupus	28102.0	0
scf7180000044562	137488	0.3579	0	58.6545	Eukaryota	88395.0	0	Chordata	88395.0	0	Carnivora	88395.0	0	Canidae	88395.0	0	Canis	88395.0	0	Canis lupus	88395.0	0
scf7180000046502	59741	0.4121	0	54.6213	Eukaryota	26280.0	0	Chordata	26280.0	0	Carnivora	26280.0	0	Canidae	26280.0	0	Canis	26280.0	0	Canis lupus	26280.0	0
scf7180000042025	975346	0.4143	0	60.9545	Eukaryota	91502.0	0	Chordata	91502.0	0	Carnivora	91502.0	0	Canidae	91502.0	0	Canis	91502.0	0	Canis lupus	91502.0	0
scf7180000047778	44640	0.4406	0	112.1345	Eukaryota	5544.0	0	Chordata	5211.0	1	Synbranchiformes	2756.0	3	Mastacembelidae	2756.0	3	Mastacembelus	2756.0	3	Mastacembelus armatus	2756.0	3
scf7180000050339	8484	0.4371	0	38.0328	Eukaryota	12819.0	0	Chordata	11792.0	1	Primates	8756.0	3	Hominidae	8163.0	4	Homo	8163.0	4	Homo sapiens	8163.0	4
scf7180000044720	31966	0.4331	0	45.4767	Eukaryota	11797.0	0	Chordata	11797.0	0	Carnivora	11797.0	0	Canidae	4265.0	3	Canis	2850.0	7	Canis lupus	2850.0	8
scf7180000048447	25105	0.44	0	72.6029	Eukaryota	2928.0	0	Chordata	1591.0	1	Polystomatidea	1337.0	3	Polystomatidae	1337.0	3	Protopolystoma	1337.0	3	Protopolystoma xenopodis	1337.0	3
scf7180000054711	23895	0.4412	0	268.2766	Eukaryota	11065.0	0	Chordata	9253.0	1	Blenniiformes	5888.0	3	Gobiesocidae	5888.0	3	Gouania	5888.0	3	Gouania willdenowi	5888.0	3
scf7180000056182	2417454	0.4099	0	60.2079	Eukaryota	57843.0	0	Chordata	57843.0	0	Carnivora	57843.0	0	Canidae	57843.0	0	Canis	57843.0	0	Canis lupus	57843.0	0
scf7180000053238	6094	0.4526	0	1184.1115	Eukaryota	20786.0	0	Chordata	18791.0	1	Gadiformes	9870.0	6	Gadidae	9870.0	6	Gadus	9870.0	6	Gadus morhua	9870.0	6
scf7180000044318	61321	0.4233	0	57.9519	Eukaryota	26187.0	0	Chordata	26187.0	0	Carnivora	26187.0	0	Canidae	26187.0	0	Canis	26187.0	0	Canis lupus	26187.0	0
scf7180000045639	149278	0.3934	0	58.8732	Eukaryota	42240.0	0	Chordata	42240.0	0	Carnivora	42240.0	0	Canidae	42240.0	0	Canis	42240.0	0	Canis lupus	42240.0	0
scf7180000047672	15816	0.448	0	2737.6362	Eukaryota	4626.0	0	Platyhelminthes	2561.0	3	Polystomatidea	2561.0	3	Polystomatidae	2561.0	3	Protopolystoma	2561.0	3	Protopolystoma xenopodis	2561.0	3
scf7180000041235	1287159	0.4158	0	59.8267	Eukaryota	77055.0	0	Chordata	77055.0	0	Carnivora	77055.0	0	Canidae	77055.0	0	Canis	77055.0	0	Canis lupus	77055.0	0
scf7180000055353	33314	0.4405	0	111.4288	Eukaryota	492.0	0	Platyhelminthes	296.0	1	Polystomatidea	296.0	1	Polystomatidae	296.0	1	Protopolystoma	296.0	1	Protopolystoma xenopodis	296.0	1
scf7180000040950	1104390	0.3808	0	59.5435	Eukaryota	55539.0	0	Chordata	55539.0	0	Carnivora	55539.0	0	Canidae	55539.0	0	Canis	55539.0	0	Canis lupus	55539.0	0
scf7180000050952	18672	0.4416	0	158.2115	Eukaryota	29979.0	0	Chordata	18362.0	2	Gadiformes	15796.0	5	Gadidae	15796.0	5	Gadus	15796.0	5	Gadus morhua	15796.0	5
scf7180000050603	4671	0.4312	0	107.5467	no-hit	0.0	0	no-hit	0.0	0	no-hit	0.0	0	no-hit	0.0	0	no-hit	0.0	0	no-hit	0.0	0
scf7180000043108	86946	0.3955	0	54.2053	Eukaryota	25198.0	0	Chordata	25198.0	0	Carnivora	25198.0	0	Canidae	25198.0	0	Canis	25198.0	0	Canis lupus	25198.0	0
scf7180000054780	135402	0.439	0	233.253	Eukaryota	60982.0	0	Platyhelminthes	35388.0	3	Strigeidida	23500.0	7	Schistosomatidae	23500.0	7	Schistosoma	23500.0	7	Schistosoma mansoni	23500.0	7
scf7180000051804	2359	0.4544	0	427.2252	no-hit	0.0	0	no-hit	0.0	0	no-hit	0.0	0	no-hit	0.0	0	no-hit	0.0	0	no-hit	0.0	0
scf7180000042880	629095	0.3752	0	59.4268	Eukaryota	23455.0	0	Chordata	23455.0	0	Primates	17077.0	2	Hominidae	17077.0	2	Homo	17077.0	3	Homo sapiens	17077.0	3
scf7180000053872	2509	0.5026	0	89.0902	Eukaryota	6352.0	0	Chordata	6352.0	0	Carnivora	6352.0	0	Canidae	6352.0	0	Canis	4411.0	1	Canis lupus	3381.0	2
scf7180000049471	28647	0.4332	0	193.1129	Eukaryota	2959.0	0	Chordata	1493.0	1	Synbranchiformes	1493.0	1	Mastacembelidae	1493.0	1	Mastacembelus	1493.0	1	Mastacembelus armatus	1493.0	1
scf7180000040799	3948	0.4397	0	524.918	no-hit	0.0	0	no-hit	0.0	0	no-hit	0.0	0	no-hit	0.0	0	no-hit	0.0	0	no-hit	0.0	0
scf7180000043928	14172	0.415	0	205.7121	Eukaryota	91525.0	0	Chordata	91525.0	0	Carnivora	91525.0	0	Canidae	91525.0	0	Canis	91525.0	0	Canis lupus	91525.0	0
scf7180000049063	45472	0.4404	0	92.4772	Eukaryota	4831.0	0	Chordata	4831.0	0	Carnivora	2642.0	2	Canidae	2642.0	2	Canis	2642.0	2	Canis lupus	2642.0	2
scf7180000046155	76234	0.3815	0	57.7566	Eukaryota	82189.0	0	Chordata	82189.0	0	Carnivora	82189.0	0	Canidae	82189.0	0	Canis	82189.0	0	Canis lupus	82189.0	0
scf7180000052844	4673	0.4502	0	1151.7974	no-hit	0.0	0	no-hit	0.0	0	no-hit	0.0	0	no-hit	0.0	0	no-hit	0.0	0	no-hit	0.0	0
scf7180000044179	340811	0.4271	0	60.3365	Eukaryota	76369.0	0	Chordata	76369.0	0	Carnivora	76369.0	0	Canidae	52537.0	2	Canis	43416.0	4	Canis lupus	43416.0	4
scf7180000043432	271250	0.391	0	56.6244	Eukaryota	38359.0	0	Chordata	38359.0	0	Carnivora	38359.0	0	Canidae	38359.0	0	Canis	38359.0	0	Canis lupus	38359.0	0
scf7180000055465	6679	0.4469	0	93.6419	Eukaryota	2635.0	0	Chordata	2635.0	0	Carnivora	2635.0	0	Canidae	2635.0	0	Canis	2635.0	0	Canis lupus	2635.0	0
scf7180000040733	19804	0.3738	0	49.7205	Eukaryota	76689.0	0	Chordata	76689.0	0	Carnivora	76689.0	0	Canidae	76689.0	0	Canis	76689.0	0	Canis lupus	76689.0	0
scf7180000042257	243338	0.4224	0	57.4866	Eukaryota	61283.0	0	Chordata	61283.0	0	Carnivora	61283.0	0	Canidae	61283.0	0	Canis	61283.0	0	Canis lupus	61283.0	0
scf7180000043916	24873	0.4472	0	205.4501	Eukaryota	51448.0	0	Chordata	51448.0	0	Carnivora	51448.0	0	Canidae	51448.0	0	Canis	51448.0	0	Canis lupus	51448.0	0
scf7180000054355	33159	0.4415	0	554.1335	Eukaryota	55224.0	0	Chordata	55224.0	0	Carnivora	55224.0	0	Canidae	55224.0	0	Canis	55224.0	0	Canis lupus	55224.0	0
scf7180000050890	2669	0.4384	0	141.3698	no-hit	0.0	0	no-hit	0.0	0	no-hit	0.0	0	no-hit	0.0	0	no-hit	0.0	0	no-hit	0.0	0
scf7180000052641	2443	0.4507	0	209.3567	Eukaryota	432.0	0	Streptophyta	432.0	0	Fabales	432.0	0	Fabaceae	432.0	0	Cicer	432.0	0	Cicer arietinum	432.0	0
scf7180000042657	31511	0.3458	0	48.8874	Eukaryota	38235.0	0	Chordata	38235.0	0	Carnivora	38235.0	0	Canidae	38235.0	0	Canis	38235.0	0	Canis lupus	38235.0	0
scf7180000046546	142678	0.3904	0	57.6143	Eukaryota	16288.0	0	Chordata	16288.0	0	Carnivora	16288.0	0	Canidae	16288.0	0	Canis	16288.0	0	Canis lupus	16288.0	0
scf7180000041421	251729	0.4195	0	59.7316	Eukaryota	49158.0	0	Chordata	49158.0	0	Carnivora	49158.0	0	Canidae	49158.0	0	Canis	49158.0	0	Canis lupus	49158.0	0
scf7180000045465	67585	0.3729	0	57.1047	Eukaryota	35163.0	0	Chordata	35163.0	0	Carnivora	35163.0	0	Canidae	35163.0	0	Canis	35163.0	0	Canis lupus	35163.0	0
scf7180000041084	72699	0.407	0	58.2546	Eukaryota	67964.0	0	Chordata	67964.0	0	Carnivora	67964.0	0	Canidae	67964.0	0	Canis	67964.0	0	Canis lupus	67964.0	0
scf7180000050564	30970	0.4342	0	57.4336	Eukaryota	19981.0	0	Chordata	19981.0	0	Carnivora	14705.0	3	Canidae	7616.0	4	Vulpes	5233.0	8	Vulpes vulpes	5233.0	8
scf7180000055462	15935	0.442	0	533.9082	Eukaryota	1344.0	0	Platyhelminthes	993.0	1	Polystomatidea	993.0	1	Polystomatidae	993.0	1	Protopolystoma	993.0	1	Protopolystoma xenopodis	993.0	1
scf7180000054702	21620	0.5244	0	223.1111	Eukaryota	3487.0	0	Chordata	3487.0	0	Carnivora	3487.0	0	Canidae	3487.0	0	Canis	2764.0	1	Canis lupus	2764.0	1
scf7180000056286	969266	0.4091	0	59.5448	Eukaryota	46382.0	0	Chordata	46382.0	0	Carnivora	46382.0	0	Canidae	42394.0	1	Vulpes	22189.0	2	Vulpes vulpes	22189.0	2
scf7180000047269	12659	0.4644	0	78.0716	Eukaryota	8242.0	0	Chordata	8242.0	0	Carnivora	8242.0	0	Canidae	8242.0	0	Canis	7126.0	1	Canis lupus	6015.0	2
scf7180000052291	7876	0.4518	0	1757.3966	Eukaryota	3142.0	0	Platyhelminthes	1171.0	3	Polystomatidea	1171.0	3	Polystomatidae	1171.0	3	Protopolystoma	1171.0	4	Protopolystoma xenopodis	1171.0	4
scf7180000045957	58730	0.4399	0	180.5021	Eukaryota	70623.0	0	Chordata	70623.0	0	Carnivora	70623.0	0	Canidae	70623.0	0	Canis	70623.0	0	Canis lupus	70623.0	0
scf7180000042853	1337542	0.4116	0	59.7665	Eukaryota	47969.0	0	Chordata	47969.0	0	Carnivora	47969.0	0	Canidae	47969.0	0	Canis	47969.0	0	Canis lupus	47969.0	0
scf7180000052207	3471	0.4587	0	300.0266	Eukaryota	1317.0	0	Echinodermata	569.0	2	Forcipulatida	569.0	2	Asteriidae	569.0	2	Asterias	569.0	2	Asterias rubens	569.0	2
scf7180000052610	3814	0.4518	0	643.1083	no-hit	0.0	0	no-hit	0.0	0	no-hit	0.0	0	no-hit	0.0	0	no-hit	0.0	0	no-hit	0.0	0
scf7180000052339	9328	0.507	0	334.0599	Eukaryota	8992.0	0	Chordata	8992.0	0	Carnivora	8992.0	0	Canidae	8992.0	0	Canis	7229.0	1	Canis lupus	5941.0	2
scf7180000044483	458126	0.3723	0	61.1231	Eukaryota	111852.0	0	Chordata	111852.0	0	Carnivora	111852.0	0	Canidae	102022.0	1	Canis	65938.0	2	Canis lupus	65938.0	2
scf7180000049976	36121	0.3662	0	59.1238	Eukaryota	7263.0	0	Chordata	6703.0	1	Primates	3065.0	6	Hominidae	3065.0	6	Homo	3065.0	6	Homo sapiens	3065.0	6
scf7180000048978	19972	0.4413	0	62.2467	Eukaryota	6014.0	0	Chordata	5472.0	1	Tetraodontiformes	3235.0	4	Tetraodontidae	3235.0	4	Takifugu	3235.0	4	Takifugu rubripes	3235.0	4
scf7180000047789	6933	0.4406	0	89.3104	Eukaryota	5894.0	0	Chordata	4736.0	1	Kurtiformes	4442.0	2	Apogonidae	4442.0	2	Sphaeramia	4442.0	2	Sphaeramia orbicularis	4442.0	2
scf7180000048142	7653	0.4397	0	118.7693	no-hit	0.0	0	no-hit	0.0	0	no-hit	0.0	0	no-hit	0.0	0	no-hit	0.0	0	no-hit	0.0	0
scf7180000055313	61401	0.4421	0	186.0253	Eukaryota	7202.0	0	Chordata	7202.0	0	Carnivora	6274.0	1	Canidae	6274.0	1	Canis	6274.0	1	Canis lupus	6274.0	1
scf7180000049269	3707	0.4427	0	346.9807	Eukaryota	411.0	0	Platyhelminthes	239.0	1	Polystomatidea	239.0	1	Polystomatidae	239.0	1	Protopolystoma	239.0	1	Protopolystoma xenopodis	239.0	1
scf7180000045689	32238	0.4354	0	117.9045	Eukaryota	88358.0	0	Chordata	88358.0	0	Carnivora	88358.0	0	Canidae	88358.0	0	Canis	88358.0	0	Canis lupus	88358.0	0
scf7180000055723	22418	0.4331	0	190.1142	no-hit	0.0	0	no-hit	0.0	0	no-hit	0.0	0	no-hit	0.0	0	no-hit	0.0	0	no-hit	0.0	0
scf7180000042029	236472	0.354	0	63.9134	Eukaryota	34938.0	0	Chordata	34938.0	0	Carnivora	34938.0	0	Canidae	34938.0	0	Canis	34938.0	0	Canis lupus	34938.0	0
scf7180000045399	195262	0.3587	0	58.2	Eukaryota	64208.0	0	Chordata	64208.0	0	Carnivora	64208.0	0	Canidae	64208.0	0	Canis	64208.0	0	Canis lupus	64208.0	0
scf7180000052941	6482	0.4426	0	56.6241	Eukaryota	2907.0	0	Chordata	2907.0	0	Carnivora	2907.0	0	Canidae	2907.0	0	Canis	2907.0	0	Canis lupus	2907.0	0
scf7180000043715	565619	0.4262	0	58.447	Eukaryota	43196.0	0	Chordata	43196.0	0	Carnivora	43196.0	0	Canidae	43196.0	0	Canis	43196.0	0	Canis lupus	43196.0	0
scf7180000043596	411608	0.4511	0	58.3257	Eukaryota	66083.0	0	Chordata	66083.0	0	Carnivora	66083.0	0	Canidae	66083.0	0	Vulpes	53683.0	1	Vulpes vulpes	53683.0	1
scf7180000054585	16260	0.4689	0	214.4558	Eukaryota	15946.0	0	Chordata	15946.0	0	Carnivora	15946.0	0	Canidae	14324.0	1	Canis	14324.0	1	Canis lupus	14324.0	1
scf7180000044818	245110	0.3446	0	61.7146	Eukaryota	23014.0	1	Chordata	23014.0	1	Primates	17434.0	3	Hominidae	17434.0	4	Homo	11614.0	5	Homo sapiens	11614.0	5
scf7180000048071	7778	0.4479	0	104.1474	no-hit	0.0	0	no-hit	0.0	0	no-hit	0.0	0	no-hit	0.0	0	no-hit	0.0	0	no-hit	0.0	0
scf7180000056449	496046	0.3629	0	59.3003	Eukaryota	56538.0	0	Chordata	56538.0	0	Carnivora	56538.0	0	Canidae	56538.0	0	Canis	56538.0	0	Canis lupus	56538.0	0
scf7180000042891	599677	0.4786	0	58.6053	Eukaryota	43545.0	0	Chordata	43545.0	0	Carnivora	43545.0	0	Canidae	43545.0	0	Canis	34242.0	1	Canis lupus	34242.0	1
scf7180000048872	36286	0.4497	0	84.0513	Eukaryota	85905.0	0	Chordata	85905.0	0	Carnivora	85905.0	0	Canidae	85905.0	0	Canis	85905.0	0	Canis lupus	85905.0	0
scf7180000047014	5275	0.4351	0	62.0083	no-hit	0.0	0	no-hit	0.0	0	no-hit	0.0	0	no-hit	0.0	0	no-hit	0.0	0	no-hit	0.0	0
scf7180000043655	392971	0.3377	0	59.1536	Eukaryota	13871.0	0	Chordata	13871.0	0	Carnivora	13871.0	0	Canidae	13871.0	0	Canis	13871.0	0	Canis lupus	13871.0	0
scf7180000054154	8976	0.44	0	838.5189	no-hit	0.0	0	no-hit	0.0	0	no-hit	0.0	0	no-hit	0.0	0	no-hit	0.0	0	no-hit	0.0	0
scf7180000048080	66048	0.5551	0	57.8525	Eukaryota	17494.0	0	Chordata	17494.0	0	Carnivora	17494.0	0	Canidae	17494.0	0	Vulpes	11037.0	1	Vulpes vulpes	11037.0	1
scf7180000048533	24819	0.4414	0	76.0293	Eukaryota	26421.0	1	Chordata	26421.0	1	Gadiformes	10054.0	5	Gadidae	10054.0	5	Gadus	10054.0	5	Gadus morhua	10054.0	6
scf7180000042607	681347	0.3877	0	60.8285	Eukaryota	108541.0	0	Chordata	108541.0	0	Carnivora	108541.0	0	Canidae	108541.0	0	Canis	108541.0	0	Canis lupus	108541.0	0
scf7180000041209	1455834	0.4181	0	60.6831	Eukaryota	68793.0	0	Chordata	68793.0	0	Carnivora	68793.0	0	Canidae	59357.0	1	Canis	37660.0	3	Canis lupus	37660.0	3
scf7180000048009	11465	0.4495	0	251.9337	Eukaryota	3291.0	0	Chordata	3291.0	0	Carnivora	2500.0	1	Canidae	2500.0	1	Canis	2500.0	1	Canis lupus	2500.0	1
scf7180000046178	116012	0.4157	0	52.1515	Eukaryota	22326.0	0	Chordata	22326.0	0	Carnivora	22326.0	0	Canidae	22326.0	0	Canis	15582.0	1	Canis lupus	15582.0	1
scf7180000045329	36597	0.4831	0	55.116	Eukaryota	6574.0	0	Chordata	6574.0	0	Carnivora	6154.0	1	Mustelidae	3031.0	4	Mustela	3031.0	6	Mustela putorius	3031.0	6
scf7180000048106	73210	0.3757	0	60.0055	Eukaryota	19078.0	0	Chordata	19078.0	0	Carnivora	19078.0	0	Canidae	11963.0	3	Canis	11963.0	3	Canis lupus	11963.0	3
scf7180000045633	161753	0.5156	0	56.3066	Eukaryota	38905.0	0	Chordata	38905.0	0	Carnivora	38905.0	0	Canidae	38905.0	0	Canis	31268.0	1	Canis lupus	31268.0	1
scf7180000055405	13857	0.4295	0	117.5366	Eukaryota	3974.0	0	Echinodermata	1991.0	2	Forcipulatida	1991.0	2	Asteriidae	1991.0	2	Asterias	1991.0	2	Asterias rubens	1991.0	2
scf7180000052005	6416	0.4353	0	21.1103	Eukaryota	200.0	0	Chordata	200.0	0	Salmoniformes	200.0	0	Salmonidae	200.0	0	Coregonus	200.0	0	Coregonus sp. 'balchen'	200.0	0
scf7180000044297	60691	0.3875	0	55.5114	Eukaryota	20123.0	0	Chordata	20123.0	0	Carnivora	20123.0	0	Canidae	20123.0	0	Canis	20123.0	0	Canis lupus	20123.0	0
scf7180000053685	5155	0.4433	0	98.4588	Eukaryota	15006.0	0	Chordata	12617.0	2	Chordata-undef	6166.0	4	Ambassidae	6166.0	4	Parambassis	6166.0	4	Parambassis ranga	6166.0	4
scf7180000041192	1302102	0.354	0	59.7225	Eukaryota	198516.0	0	Chordata	198516.0	0	Carnivora	189598.0	1	Canidae	150717.0	3	Canis	140128.0	4	Canis lupus	140128.0	4
scf7180000055997	5718	0.4388	0	63.1886	Eukaryota	23228.0	0	Chordata	18754.0	1	Gadiformes	10985.0	5	Gadidae	10985.0	5	Gadus	10985.0	5	Gadus morhua	10985.0	5
scf7180000044863	257069	0.4178	0	59.2996	Eukaryota	105028.0	0	Chordata	105028.0	0	Carnivora	105028.0	0	Canidae	105028.0	0	Canis	105028.0	0	Canis lupus	105028.0	0
scf7180000050634	8265	0.4479	0	1183.7479	Eukaryota	1654.0	0	Echinodermata	933.0	2	Forcipulatida	933.0	2	Asteriidae	933.0	2	Asterias	933.0	2	Asterias rubens	933.0	2
scf7180000056204	1050047	0.402	0	60.7234	Eukaryota	92052.0	0	Chordata	92052.0	0	Carnivora	92052.0	0	Canidae	92052.0	0	Canis	92052.0	0	Canis lupus	92052.0	0
scf7180000040580	1182998	0.4433	0	59.1426	Eukaryota	130648.0	0	Chordata	130648.0	0	Carnivora	130648.0	0	Canidae	130648.0	0	Canis	130648.0	0	Canis lupus	130648.0	0
scf7180000046386	9369	0.4205	0	115.2775	Eukaryota	81894.0	0	Chordata	81894.0	0	Carnivora	81894.0	0	Canidae	81894.0	0	Canis	81894.0	0	Canis lupus	81894.0	0
scf7180000055151	27141	0.4377	0	517.7754	Eukaryota	45211.0	0	Chordata	37117.0	2	Gadiformes	25909.0	6	Gadidae	25909.0	6	Gadus	25909.0	6	Gadus morhua	25909.0	6
scf7180000053075	2737	0.4593	0	754.4611	no-hit	0.0	0	no-hit	0.0	0	no-hit	0.0	0	no-hit	0.0	0	no-hit	0.0	0	no-hit	0.0	0
scf7180000041415	588807	0.4405	0	60.7236	Eukaryota	58891.0	0	Chordata	58891.0	0	Carnivora	58891.0	0	Canidae	49915.0	1	Canis	38366.0	3	Canis lupus	38366.0	3
scf7180000045242	198295	0.4687	0	62.1685	Eukaryota	52003.0	0	Chordata	52003.0	0	Carnivora	52003.0	0	Canidae	52003.0	0	Canis	52003.0	0	Canis lupus	52003.0	0
scf7180000041629	796615	0.4189	0	60.5005	Eukaryota	102701.0	0	Chordata	102701.0	0	Carnivora	102701.0	0	Otariidae	55488.0	2	Ailuropoda	26781.0	4	Ailuropoda melanoleuca	26781.0	4
scf7180000041296	174966	0.3539	100	58.8023	Eukaryota	84722.0	0	Chordata	84722.0	0	Carnivora	84722.0	0	Canidae	84722.0	0	Canis	84722.0	0	Canis lupus	84722.0	0
scf7180000043161	461223	0.4153	0	61.9885	Eukaryota	89488.0	0	Chordata	89488.0	0	Carnivora	89488.0	0	Canidae	89488.0	0	Canis	89488.0	0	Canis lupus	89488.0	0
scf7180000055514	17099	0.4316	0	119.7073	no-hit	0.0	0	no-hit	0.0	0	no-hit	0.0	0	no-hit	0.0	0	no-hit	0.0	0	no-hit	0.0	0
scf7180000051272	21592	0.4743	0	57.3415	Eukaryota	16365.0	0	Chordata	16365.0	0	Carnivora	16365.0	0	Canidae	16365.0	0	Canis	15775.0	1	Canis lupus	15775.0	1
scf7180000049109	8765	0.5045	0	168.5999	Eukaryota	8443.0	0	Chordata	8443.0	0	Carnivora	8443.0	0	Canidae	8443.0	0	Canis	7361.0	1	Canis lupus	6229.0	2
scf7180000056568	152634	0.5278	0	56.0691	Eukaryota	46726.0	0	Chordata	46726.0	0	Carnivora	46726.0	0	Canidae	25263.0	4	Canis	19722.0	8	Canis lupus	19722.0	8
scf7180000041560	994379	0.4287	0	59.6775	Eukaryota	140303.0	0	Chordata	140303.0	0	Carnivora	140303.0	0	Canidae	140303.0	0	Canis	132155.0	1	Canis lupus	132155.0	1
scf7180000052584	2161	0.4489	0	217.7113	no-hit	0.0	0	no-hit	0.0	0	no-hit	0.0	0	no-hit	0.0	0	no-hit	0.0	0	no-hit	0.0	0
scf7180000050847	3630	0.441	0	767.3564	no-hit	0.0	0	no-hit	0.0	0	no-hit	0.0	0	no-hit	0.0	0	no-hit	0.0	0	no-hit	0.0	0
scf7180000054555	24415	0.4403	0	696.0605	Eukaryota	6701.0	0	Platyhelminthes	4636.0	1	Cyclophyllidea	4366.0	2	Hymenolepididae	4366.0	2	Hymenolepis	4366.0	2	Hymenolepis microstoma	4366.0	2
scf7180000042375	666955	0.4214	0	60.5297	Eukaryota	58625.0	0	Chordata	58625.0	0	Carnivora	58625.0	0	Canidae	58625.0	0	Vulpes	53775.0	1	Vulpes vulpes	53775.0	1
scf7180000048183	52607	0.4454	0	58.6056	Eukaryota	14805.0	0	Chordata	14805.0	0	Carnivora	13419.0	1	Canidae	5029.0	4	Canis	5029.0	7	Canis lupus	5029.0	7
scf7180000051663	13447	0.4439	0	58.0251	Eukaryota	8718.0	0	Chordata	8718.0	0	Carnivora	8718.0	0	Felidae	7859.0	1	Felis	7859.0	1	Felis catus	7859.0	1
scf7180000045732	236418	0.3905	0	61.6782	Eukaryota	68890.0	0	Chordata	68890.0	0	Carnivora	68890.0	0	Canidae	68890.0	0	Canis	68890.0	0	Canis lupus	68890.0	0
scf7180000048446	68894	0.4441	0	175.8116	Eukaryota	22150.0	0	Chordata	17978.0	1	Carnivora	14242.0	2	Canidae	14242.0	2	Canis	14242.0	2	Canis lupus	14242.0	2
scf7180000056518	244104	0.4423	0	60.42	Eukaryota	67486.0	0	Chordata	67486.0	0	Carnivora	67486.0	0	Canidae	67486.0	0	Vulpes	40590.0	1	Vulpes vulpes	40590.0	1
scf7180000049403	8042	0.4549	0	194.759	Eukaryota	475.0	0	Chordata	475.0	0	Syngnathiformes	475.0	0	Syngnathidae	475.0	0	Syngnathus	475.0	0	Syngnathus acus	475.0	0
scf7180000056603	321957	0.3708	100	58.3984	Eukaryota	107907.0	0	Chordata	107907.0	0	Carnivora	107907.0	0	Canidae	107907.0	0	Canis	107907.0	0	Canis lupus	107907.0	0
scf7180000045078	73504	0.4385	0	292.4266	Eukaryota	101416.0	0	Chordata	57671.0	1	Gadiformes	57671.0	2	Gadidae	57671.0	2	Gadus	57671.0	2	Gadus morhua	57671.0	2
scf7180000050628	4422	0.4435	0	458.265	no-hit	0.0	0	no-hit	0.0	0	no-hit	0.0	0	no-hit	0.0	0	no-hit	0.0	0	no-hit	0.0	0
scf7180000042932	617814	0.4014	0	60.6794	Eukaryota	88827.0	0	Chordata	88827.0	0	Carnivora	88827.0	0	Canidae	88827.0	0	Canis	88827.0	0	Canis lupus	88827.0	0
scf7180000056243	226473	0.3587	0	64.3441	Eukaryota	95254.0	0	Chordata	95254.0	0	Carnivora	95254.0	0	Canidae	95254.0	0	Canis	95254.0	0	Canis lupus	95254.0	0
scf7180000048907	22563	0.4394	0	285.6597	Eukaryota	68860.0	0	Chordata	43483.0	1	Gadiformes	34885.0	4	Gadidae	34885.0	4	Gadus	34885.0	4	Gadus morhua	34885.0	4
scf7180000049402	12616	0.5744	0	353.8189	Eukaryota	56140.0	0	Chordata	56140.0	0	Primates	21929.0	3	Bovidae	16695.0	4	Ovis	16695.0	5	Ovis aries	16695.0	5
scf7180000054179	208882	0.4318	0	57.456	Eukaryota	29156.0	0	Chordata	29156.0	0	Carnivora	29156.0	0	Canidae	29156.0	0	Canis	29156.0	0	Canis lupus	29156.0	0
scf7180000042452	656030	0.363	0	60.0513	Eukaryota	104534.0	0	Chordata	104534.0	0	Carnivora	104534.0	0	Canidae	104534.0	0	Canis	84912.0	1	Canis lupus	84912.0	1
scf7180000044343	10614	0.3522	0	29.9837	Eukaryota	2319.0	0	Chordata	2319.0	0	Carnivora	2319.0	0	Canidae	2319.0	0	Canis	2319.0	0	Canis lupus	2319.0	0
scf7180000052321	3214	0.4437	0	597.9994	no-hit	0.0	0	no-hit	0.0	0	no-hit	0.0	0	no-hit	0.0	0	no-hit	0.0	0	no-hit	0.0	0
scf7180000048288	48834	0.3934	0	61.1699	Eukaryota	53109.0	0	Chordata	53109.0	0	Carnivora	53109.0	0	Canidae	53109.0	0	Canis	53109.0	0	Canis lupus	53109.0	0
scf7180000052733	3121	0.5107	0	124.8146	Eukaryota	4508.0	0	Chordata	4508.0	0	Carnivora	4508.0	0	Canidae	4508.0	0	Nyctereutes	2382.0	1	Nyctereutes procyonoides	2382.0	2
scf7180000047538	100108	0.3821	0	61.3777	Eukaryota	48145.0	0	Chordata	48145.0	0	Carnivora	48145.0	0	Canidae	25973.0	6	Canis	14911.0	8	Canis lupus	14911.0	8
scf7180000053194	2204	0.446	0	1337.5725	no-hit	0.0	0	no-hit	0.0	0	no-hit	0.0	0	no-hit	0.0	0	no-hit	0.0	0	no-hit	0.0	0
scf7180000042645	606288	0.4312	0	59.855	Eukaryota	64075.0	0	Chordata	64075.0	0	Carnivora	64075.0	0	Canidae	64075.0	0	Canis	64075.0	0	Canis lupus	64075.0	0
scf7180000047794	83272	0.3848	0	57.1141	Eukaryota	30448.0	0	Chordata	30448.0	0	Carnivora	30448.0	0	Canidae	30448.0	0	Canis	30448.0	0	Canis lupus	30448.0	0
scf7180000055090	10149	0.4372	0	95.5851	Eukaryota	377.0	0	Chordata	377.0	0	Tetraodontiformes	377.0	0	Tetraodontidae	377.0	0	Takifugu	377.0	0	Takifugu rubripes	377.0	0
scf7180000054829	25072	0.4415	0	320.5034	Eukaryota	5465.0	0	Chordata	3311.0	1	Kurtiformes	2690.0	2	Apogonidae	2690.0	2	Sphaeramia	2690.0	2	Sphaeramia orbicularis	2690.0	2
scf7180000047058	20678	0.3845	0	48.525	Eukaryota	82676.0	0	Chordata	82676.0	0	Carnivora	82676.0	0	Canidae	82676.0	0	Canis	82676.0	0	Canis lupus	82676.0	0
scf7180000047936	7910	0.4067	0	25.5119	Eukaryota	1593.0	0	Chordata	1593.0	0	Carnivora	1593.0	0	Canidae	1593.0	0	Vulpes	1593.0	0	Vulpes vulpes	1593.0	0
scf7180000046942	56008	0.5425	0	56.1015	Eukaryota	10208.0	0	Chordata	10208.0	0	Carnivora	10208.0	0	Canidae	8777.0	2	Canis	5628.0	3	Canis lupus	5628.0	3
scf7180000049326	22811	0.4494	0	1872.4095	Eukaryota	239.0	0	Streptophyta	239.0	0	Fabales	239.0	0	Fabaceae	239.0	0	Cicer	239.0	0	Cicer arietinum	239.0	0
scf7180000045019	564430	0.428	0	60.6372	Eukaryota	61030.0	0	Chordata	61030.0	0	Carnivora	61030.0	0	Canidae	55549.0	1	Vulpes	55549.0	1	Vulpes vulpes	55549.0	1
scf7180000043305	479835	0.3576	0	60.5079	Eukaryota	34006.0	0	Chordata	34006.0	0	Carnivora	34006.0	0	Canidae	34006.0	0	Canis	34006.0	0	Canis lupus	34006.0	0
scf7180000043777	50233	0.3627	0	64.1518	Eukaryota	92262.0	0	Chordata	92262.0	0	Carnivora	92262.0	0	Canidae	92262.0	0	Canis	92262.0	0	Canis lupus	92262.0	0
scf7180000044397	327745	0.5773	0	57.7355	Eukaryota	31741.0	0	Chordata	31741.0	0	Carnivora	31741.0	0	Canidae	31741.0	0	Canis	25325.0	1	Canis lupus	22420.0	2
scf7180000044068	493962	0.4158	100	59.7881	Eukaryota	30101.0	0	Chordata	30101.0	0	Carnivora	30101.0	0	Canidae	30101.0	0	Canis	30101.0	0	Canis lupus	30101.0	0
scf7180000052883	11963	0.5072	0	795.4453	Eukaryota	8902.0	0	Chordata	8902.0	0	Carnivora	8902.0	0	Canidae	8902.0	0	Canis	7234.0	1	Canis lupus	6044.0	2
scf7180000053563	7661	0.5067	0	41.8808	Eukaryota	8368.0	0	Chordata	8368.0	0	Carnivora	8368.0	0	Canidae	8368.0	0	Canis	6755.0	1	Canis lupus	5597.0	2
scf7180000043131	259255	0.4182	0	58.9707	Eukaryota	39654.0	0	Chordata	39654.0	0	Carnivora	39654.0	0	Canidae	39654.0	0	Canis	39654.0	0	Canis lupus	39654.0	0
scf7180000044457	125874	0.3876	0	57.4986	Eukaryota	63468.0	0	Chordata	63468.0	0	Carnivora	63468.0	0	Canidae	63468.0	0	Canis	63468.0	0	Canis lupus	63468.0	0
scf7180000053772	2079	0.4483	0	48.0634	Eukaryota	178.0	0	Chordata	178.0	0	Osteoglossiformes	178.0	0	Osteoglossidae	178.0	0	Scleropages	178.0	0	Scleropages formosus	178.0	0
scf7180000044351	347237	0.4646	0	58.6522	Eukaryota	57189.0	0	Chordata	57189.0	0	Carnivora	57189.0	0	Canidae	40061.0	2	Vulpes	40061.0	2	Vulpes vulpes	40061.0	2
scf7180000045747	193751	0.3962	0	59.0856	Eukaryota	26712.0	0	Chordata	26712.0	0	Carnivora	26712.0	0	Canidae	26712.0	0	Canis	26712.0	0	Canis lupus	26712.0	0
scf7180000044435	14137	0.5822	0	48.4377	Eukaryota	21287.0	0	Chordata	21287.0	0	Carnivora	20875.0	1	Canidae	19979.0	2	Canis	19979.0	2	Canis lupus	19979.0	2
scf7180000040847	30141	0.3661	0	61.8062	Eukaryota	63727.0	0	Chordata	63727.0	0	Carnivora	63727.0	0	Canidae	63727.0	0	Canis	63727.0	0	Canis lupus	63727.0	0
scf7180000045374	179822	0.3792	0	60.35	Eukaryota	62397.0	0	Chordata	62397.0	0	Carnivora	62397.0	0	Canidae	62397.0	0	Canis	62397.0	0	Canis lupus	62397.0	0
scf7180000051461	35051	0.3777	0	61.8009	Eukaryota	5711.0	0	Chordata	5711.0	0	Carnivora	4900.0	1	Canidae	4272.0	2	Canis	4272.0	2	Canis lupus	4272.0	2
scf7180000050793	3039	0.4442	0	80.2317	no-hit	0.0	0	no-hit	0.0	0	no-hit	0.0	0	no-hit	0.0	0	no-hit	0.0	0	no-hit	0.0	0
scf7180000052971	3010	0.4435	0	331.4538	Eukaryota	10528.0	0	Chordata	10047.0	1	Gadiformes	4677.0	6	Gadidae	4677.0	6	Gadus	4677.0	6	Gadus morhua	4677.0	6
scf7180000044208	26309	0.3712	0	56.9415	Eukaryota	7974.0	0	Chordata	7974.0	0	Carnivora	6044.0	1	Otariidae	3352.0	2	Canis	2692.0	4	Canis lupus	2692.0	4
scf7180000056337	535861	0.4063	0	56.294	Eukaryota	38320.0	0	Chordata	38320.0	0	Carnivora	38320.0	0	Canidae	38320.0	0	Canis	33173.0	1	Canis lupus	33173.0	1
scf7180000045535	223299	0.3891	0	59.4064	Eukaryota	19916.0	0	Chordata	19916.0	0	Primates	14610.0	3	Hominidae	10883.0	4	Homo	8949.0	5	Homo sapiens	8949.0	5
scf7180000054871	21618	0.4407	0	159.1124	Eukaryota	9553.0	0	Chordata	8150.0	1	Kurtiformes	4464.0	3	Apogonidae	4464.0	3	Sphaeramia	4464.0	3	Sphaeramia orbicularis	4464.0	3
scf7180000043004	11234	0.361	0	52.0367	Eukaryota	32261.0	0	Chordata	32261.0	0	Carnivora	32261.0	0	Canidae	32261.0	0	Canis	32261.0	0	Canis lupus	32261.0	0
scf7180000041679	1718340	0.521	0	58.7198	Eukaryota	69479.0	0	Chordata	69479.0	0	Carnivora	69479.0	0	Canidae	69479.0	0	Vulpes	49047.0	1	Vulpes vulpes	49047.0	1
scf7180000045940	40011	0.4142	0	216.0126	Eukaryota	48056.0	0	Chordata	48056.0	0	Carnivora	48056.0	0	Canidae	48056.0	0	Canis	48056.0	0	Canis lupus	48056.0	0
scf7180000046323	32326	0.4392	0	124.8163	Eukaryota	10216.0	0	Chordata	10216.0	0	Tetraodontiformes	6313.0	2	Tetraodontidae	6313.0	2	Takifugu	6313.0	2	Takifugu rubripes	6313.0	2
scf7180000045371	205827	0.3869	0	60.5199	Eukaryota	27307.0	0	Chordata	27307.0	0	Carnivora	27307.0	0	Canidae	27307.0	0	Canis	27307.0	0	Canis lupus	27307.0	0
scf7180000042391	60110	0.5135	0	54.9679	Eukaryota	6497.0	0	Chordata	6497.0	0	Carnivora	2565.0	2	Canidae	2565.0	2	Canis	2565.0	3	Canis lupus	2565.0	3
scf7180000041977	115966	0.3924	0	57.9312	Eukaryota	9271.0	0	Chordata	9271.0	0	Carnivora	7510.0	1	Canidae	4173.0	3	Canis	3009.0	6	Canis lupus	3009.0	6
scf7180000042349	654934	0.4313	0	59.2665	Eukaryota	45451.0	0	Chordata	45451.0	0	Carnivora	45451.0	0	Canidae	45451.0	0	Canis	28029.0	1	Canis lupus	28029.0	1
scf7180000049901	3148	0.4527	0	353.708	no-hit	0.0	0	no-hit	0.0	0	no-hit	0.0	0	no-hit	0.0	0	no-hit	0.0	0	no-hit	0.0	0
scf7180000042482	258992	0.345	0	57.9254	Eukaryota	85586.0	0	Chordata	85586.0	0	Carnivora	85586.0	0	Canidae	85586.0	0	Canis	85586.0	0	Canis lupus	85586.0	0
scf7180000045677	184722	0.4006	0	59.2316	Eukaryota	91080.0	0	Chordata	91080.0	0	Carnivora	91080.0	0	Canidae	91080.0	0	Canis	79392.0	1	Canis lupus	79392.0	1
scf7180000051472	7356	0.4474	0	1364.0397	Eukaryota	2840.0	1	Echinodermata	1700.0	3	Forcipulatida	1700.0	3	Asteriidae	1700.0	3	Asterias	1700.0	3	Asterias rubens	1700.0	3
scf7180000049924	9774	0.4504	0	1602.6543	Eukaryota	18240.0	0	Chordata	17031.0	2	Gadiformes	11968.0	6	Gadidae	11968.0	6	Gadus	11968.0	6	Gadus morhua	11968.0	6
scf7180000047025	83609	0.3585	0	58.5817	Eukaryota	28524.0	0	Chordata	28524.0	0	Carnivora	28524.0	0	Canidae	11549.0	3	Canis	7571.0	4	Canis lupus	7571.0	5
scf7180000047194	90038	0.4621	0	62.7612	Eukaryota	57035.0	0	Chordata	57035.0	0	Carnivora	57035.0	0	Canidae	57035.0	0	Vulpes	28885.0	1	Vulpes vulpes	28885.0	1
scf7180000049463	44285	0.5078	0	329.1316	Eukaryota	9676.0	0	Chordata	9676.0	0	Carnivora	9676.0	0	Canidae	9676.0	0	Nyctereutes	5278.0	1	Nyctereutes procyonoides	5278.0	1
scf7180000046910	80313	0.3798	0	56.9195	Eukaryota	12764.0	0	Chordata	12764.0	0	Primates	10031.0	1	Hominidae	6879.0	3	Homo	6879.0	4	Homo sapiens	6879.0	4
scf7180000049798	44565	0.5026	0	625.2794	Eukaryota	9424.0	0	Chordata	9424.0	0	Carnivora	9424.0	0	Canidae	9424.0	0	Canis	8184.0	1	Canis lupus	6896.0	2
scf7180000052931	3009	0.4543	0	83.9287	Eukaryota	243.0	0	Platyhelminthes	243.0	0	Polystomatidea	243.0	0	Polystomatidae	243.0	0	Protopolystoma	243.0	0	Protopolystoma xenopodis	243.0	0
scf7180000050312	2744	0.4417	0	133.2384	no-hit	0.0	0	no-hit	0.0	0	no-hit	0.0	0	no-hit	0.0	0	no-hit	0.0	0	no-hit	0.0	0
scf7180000054486	493490	0.4407	0	91.428	Eukaryota	91896.0	0	Chordata	91896.0	0	Carnivora	91896.0	0	Canidae	91896.0	0	Canis	91896.0	0	Canis lupus	91896.0	0
scf7180000056522	212487	0.358	0	60.329	Eukaryota	31270.0	0	Chordata	31270.0	0	Carnivora	31270.0	0	Canidae	31270.0	0	Canis	31270.0	0	Canis lupus	31270.0	0
scf7180000044234	204116	0.3796	0	59.5631	Eukaryota	49409.0	0	Chordata	49409.0	0	Carnivora	49409.0	0	Canidae	49409.0	0	Canis	49409.0	0	Canis lupus	49409.0	0
scf7180000042245	2410	0.4017	0	553.7461	no-hit	0.0	0	no-hit	0.0	0	no-hit	0.0	0	no-hit	0.0	0	no-hit	0.0	0	no-hit	0.0	0
scf7180000040625	2004520	0.4244	0	59.5558	Eukaryota	75706.0	0	Chordata	75706.0	0	Carnivora	75706.0	0	Canidae	69835.0	1	Canis	55795.0	2	Canis lupus	55795.0	2
scf7180000044407	66258	0.4333	0	107.8056	Eukaryota	94475.0	0	Chordata	94475.0	0	Carnivora	94475.0	0	Canidae	94475.0	0	Canis	94475.0	0	Canis lupus	94475.0	0
scf7180000056271	429632	0.3888	0	60.359	Eukaryota	108788.0	0	Chordata	108788.0	0	Carnivora	108788.0	0	Canidae	108788.0	0	Canis	108788.0	0	Canis lupus	108788.0	0
scf7180000048174	61867	0.4382	0	76.6707	Eukaryota	92424.0	0	Chordata	92424.0	0	Carnivora	92424.0	0	Canidae	92424.0	0	Canis	92424.0	0	Canis lupus	92424.0	0
scf7180000048078	80927	0.3925	0	61.2643	Eukaryota	83374.0	0	Chordata	83374.0	0	Carnivora	83374.0	0	Canidae	83374.0	0	Canis	50045.0	1	Canis lupus	50045.0	1
scf7180000041008	79364	0.5073	0	56.0985	Eukaryota	39041.0	0	Chordata	39041.0	0	Carnivora	32996.0	1	Canidae	32996.0	1	Vulpes	18256.0	2	Vulpes vulpes	18256.0	2
scf7180000053376	2523	0.4423	0	44.3495	no-hit	0.0	0	no-hit	0.0	0	no-hit	0.0	0	no-hit	0.0	0	no-hit	0.0	0	no-hit	0.0	0
scf7180000049990	9718	0.5118	0	1421.6798	Eukaryota	8499.0	0	Chordata	8499.0	0	Carnivora	8499.0	0	Canidae	8499.0	0	Canis	6817.0	1	Canis lupus	5605.0	2
scf7180000051422	14794	0.4693	0	58.8542	Eukaryota	2576.0	1	Chordata	2576.0	1	Carnivora	2110.0	2	Canidae	2110.0	2	Canis	2110.0	2	Canis lupus	2110.0	2
scf7180000047131	19432	0.3767	0	48.0075	Eukaryota	28697.0	0	Chordata	28697.0	0	Carnivora	28697.0	0	Canidae	15484.0	3	Canis	10398.0	7	Canis lupus	10398.0	7
scf7180000045298	190415	0.4634	0	59.2325	Eukaryota	26256.0	0	Chordata	26256.0	0	Carnivora	26256.0	0	Canidae	26256.0	0	Canis	23443.0	1	Canis lupus	23443.0	1
scf7180000048179	61700	0.3835	0	73.9302	Eukaryota	92977.0	0	Chordata	92977.0	0	Carnivora	92977.0	0	Canidae	92977.0	0	Canis	92977.0	0	Canis lupus	92977.0	0
scf7180000045171	96303	0.384	0	56.7787	Eukaryota	40475.0	0	Chordata	40475.0	0	Carnivora	40475.0	0	Canidae	40475.0	0	Canis	40475.0	0	Canis lupus	40475.0	0
scf7180000043675	459502	0.4207	0	59.1743	Eukaryota	18582.0	0	Chordata	18582.0	0	Carnivora	16903.0	1	Canidae	16903.0	1	Canis	16903.0	1	Canis lupus	16903.0	1
scf7180000048060	15194	0.4398	0	80.4768	no-hit	0.0	0	no-hit	0.0	0	no-hit	0.0	0	no-hit	0.0	0	no-hit	0.0	0	no-hit	0.0	0
scf7180000055406	40738	0.4407	0	162.9572	Eukaryota	11783.0	0	Chordata	7878.0	2	Tetraodontiformes	6303.0	4	Tetraodontidae	6303.0	4	Takifugu	6303.0	4	Takifugu rubripes	6303.0	4
scf7180000052595	6847	0.4441	0	324.5979	no-hit	0.0	0	no-hit	0.0	0	no-hit	0.0	0	no-hit	0.0	0	no-hit	0.0	0	no-hit	0.0	0
scf7180000050718	14825	0.5029	0	781.1718	Eukaryota	8841.0	0	Chordata	8841.0	0	Carnivora	8841.0	0	Canidae	8841.0	0	Canis	7137.0	1	Canis lupus	5921.0	2
scf7180000045154	208117	0.3938	0	59.2907	Eukaryota	15639.0	0	Chordata	15639.0	0	Carnivora	14610.0	1	Canidae	14610.0	1	Canis	14610.0	1	Canis lupus	14610.0	1
scf7180000041877	355859	0.3471	0	58.6472	Eukaryota	84634.0	0	Chordata	84634.0	0	Carnivora	84634.0	0	Canidae	84634.0	0	Canis	84634.0	0	Canis lupus	84634.0	0
scf7180000053677	4232	0.4428	0	30.16	Eukaryota	3652.0	0	Platyhelminthes	2343.0	1	Polystomatidea	2343.0	3	Polystomatidae	2343.0	3	Protopolystoma	2343.0	3	Protopolystoma xenopodis	2343.0	3
scf7180000042172	154528	0.3826	0	58.9485	Eukaryota	11836.0	0	Chordata	11836.0	0	Carnivora	11836.0	0	Canidae	11836.0	0	Canis	11836.0	0	Canis lupus	11836.0	0
scf7180000051396	5349	0.4577	0	36.9725	Eukaryota	2938.0	0	Chordata	2596.0	1	Tetraodontiformes	2596.0	1	Tetraodontidae	2596.0	1	Takifugu	2596.0	1	Takifugu rubripes	2596.0	1
scf7180000055894	36978	0.4382	0	306.8634	Eukaryota	7913.0	0	Chordata	5010.0	1	Polystomatidea	2903.0	3	Polystomatidae	2903.0	3	Protopolystoma	2903.0	3	Protopolystoma xenopodis	2903.0	3
scf7180000050272	33006	0.44	0	86.0495	Eukaryota	8155.0	0	Chordata	5107.0	2	Tetraodontiformes	5107.0	2	Tetraodontidae	5107.0	2	Takifugu	5107.0	2	Takifugu rubripes	5107.0	2
scf7180000041150	1224808	0.4282	0	59.7289	Eukaryota	102228.0	0	Chordata	102228.0	0	Carnivora	102228.0	0	Canidae	102228.0	0	Canis	78463.0	1	Canis lupus	78463.0	1
scf7180000043732	82149	0.4424	0	56.0196	Eukaryota	56480.0	0	Chordata	56480.0	0	Carnivora	56480.0	0	Canidae	56480.0	0	Canis	56480.0	0	Canis lupus	56480.0	0
scf7180000055379	14979	0.4355	0	426.3395	Eukaryota	2849.0	0	Chordata	2849.0	0	Carnivora	2849.0	0	Canidae	2849.0	0	Canis	2849.0	0	Canis lupus	2849.0	0
scf7180000056241	83236	0.3822	0	58.8504	Eukaryota	57379.0	0	Chordata	57379.0	0	Carnivora	57379.0	0	Canidae	57379.0	0	Canis	57379.0	0	Canis lupus	57379.0	0
scf7180000042053	795995	0.4638	0	60.4883	Eukaryota	64785.0	0	Chordata	64785.0	0	Carnivora	64785.0	0	Canidae	64785.0	0	Canis	52232.0	1	Canis lupus	52232.0	1
scf7180000055337	22684	0.4519	0	284.7038	Eukaryota	12451.0	0	Chordata	12451.0	0	Carnivora	12451.0	0	Canidae	12451.0	0	Canis	10127.0	1	Canis lupus	9159.0	2
scf7180000043862	412203	0.3711	0	59.9902	Eukaryota	34067.0	0	Chordata	34067.0	0	Carnivora	34067.0	0	Canidae	34067.0	0	Canis	25869.0	1	Canis lupus	25869.0	1
scf7180000045123	179431	0.4404	0	58.5527	Eukaryota	59419.0	0	Chordata	59419.0	0	Carnivora	59419.0	0	Canidae	59419.0	0	Canis	59419.0	0	Canis lupus	59419.0	0
scf7180000044811	23368	0.4084	0	67.2761	Eukaryota	65405.0	0	Chordata	65405.0	0	Carnivora	65405.0	0	Canidae	65405.0	0	Canis	65405.0	0	Canis lupus	65405.0	0
scf7180000054560	23209	0.4077	0	922.8551	Eukaryota	88965.0	0	Chordata	88965.0	0	Carnivora	88965.0	0	Canidae	88965.0	0	Canis	88965.0	0	Canis lupus	88965.0	0
scf7180000056439	386415	0.3829	0	60.3993	Eukaryota	58737.0	0	Chordata	58737.0	0	Carnivora	50849.0	1	Canidae	29540.0	4	Canis	23750.0	6	Canis lupus	23750.0	6
scf7180000053934	4207	0.4493	0	339.4834	Eukaryota	561.0	0	Chordata	333.0	1	Tetraodontiformes	333.0	1	Tetraodontidae	333.0	1	Takifugu	333.0	1	Takifugu rubripes	333.0	1
scf7180000049683	32222	0.4399	0	57.3421	Eukaryota	11659.0	0	Chordata	11659.0	0	Carnivora	11659.0	0	Canidae	7708.0	2	Canis	6389.0	5	Canis lupus	6389.0	5
scf7180000042402	398176	0.4321	0	59.0973	Eukaryota	86997.0	0	Chordata	86997.0	0	Carnivora	86997.0	0	Canidae	86997.0	0	Canis	86997.0	0	Canis lupus	86997.0	0
scf7180000043152	72820	0.4139	0	59.9266	Eukaryota	63744.0	0	Chordata	63744.0	0	Carnivora	63744.0	0	Canidae	63744.0	0	Canis	63744.0	0	Canis lupus	63744.0	0
scf7180000042938	64383	0.4271	0	58.8878	Eukaryota	23290.0	0	Chordata	23290.0	0	Carnivora	23290.0	0	Canidae	23290.0	0	Canis	23290.0	0	Canis lupus	23290.0	0
scf7180000047361	6128	0.7244	0	32.9307	Eukaryota	50598.0	0	Chordata	50598.0	0	Carnivora	50598.0	0	Canidae	50598.0	0	Canis	50598.0	0	Canis lupus	50598.0	0
scf7180000046923	92332	0.4567	0	59.4137	Eukaryota	19579.0	0	Chordata	19579.0	0	Carnivora	18288.0	1	Canidae	11395.0	3	Canis	11395.0	3	Canis lupus	11395.0	4
scf7180000051114	13638	0.4278	0	198.8556	no-hit	0.0	0	no-hit	0.0	0	no-hit	0.0	0	no-hit	0.0	0	no-hit	0.0	0	no-hit	0.0	0
scf7180000043134	574967	0.4856	0	59.1159	Eukaryota	116963.0	0	Chordata	116963.0	0	Carnivora	116963.0	0	Canidae	107271.0	1	Canis	71463.0	2	Canis lupus	71463.0	2
scf7180000044022	58716	0.4404	0	404.9365	Eukaryota	13879.0	0	Chordata	13879.0	0	Tetraodontiformes	8132.0	3	Tetraodontidae	8132.0	3	Takifugu	8132.0	3	Takifugu rubripes	8132.0	3
scf7180000043248	4401	0.4269	0	25.5724	Eukaryota	5465.0	0	Chordata	5465.0	0	Carnivora	5465.0	0	Canidae	5465.0	0	Canis	5465.0	0	Canis lupus	5465.0	0
scf7180000045226	214524	0.3641	0	61.7127	Eukaryota	16821.0	0	Chordata	16821.0	0	Primates	6105.0	3	Hominidae	4725.0	6	Homo	4725.0	6	Homo sapiens	4725.0	6
scf7180000049746	34296	0.6434	0	55.6082	Eukaryota	21982.0	0	Chordata	21982.0	0	Carnivora	21982.0	0	Canidae	21982.0	0	Canis	15747.0	1	Canis lupus	15747.0	1
scf7180000044558	265772	0.464	0	59.7071	Eukaryota	25728.0	0	Chordata	25728.0	0	Carnivora	23753.0	1	Ursidae	19711.0	2	Ursus	19711.0	2	Ursus maritimus	11233.0	3
scf7180000044509	281339	0.4595	0	59.458	Eukaryota	68568.0	0	Chordata	68568.0	0	Carnivora	68568.0	0	Canidae	56844.0	1	Canis	56844.0	1	Canis lupus	56844.0	1
scf7180000052344	6888	0.4698	0	55.4966	Eukaryota	4758.0	0	Chordata	4758.0	0	Carnivora	4758.0	0	Canidae	4758.0	0	Canis	4758.0	0	Canis lupus	4758.0	0
scf7180000053199	9452	0.445	0	911.3824	Eukaryota	1994.0	0	Echinodermata	808.0	2	Forcipulatida	808.0	2	Asteriidae	808.0	2	Asterias	808.0	2	Asterias rubens	808.0	2
scf7180000051182	26457	0.503	0	482.7463	Eukaryota	9361.0	0	Chordata	9361.0	0	Carnivora	9361.0	0	Canidae	9361.0	0	Canis	7643.0	1	Canis lupus	6412.0	2
scf7180000040717	725488	0.4026	0	59.4648	Eukaryota	43464.0	0	Chordata	43464.0	0	Carnivora	43464.0	0	Canidae	43464.0	0	Canis	34336.0	1	Canis lupus	34336.0	1
scf7180000045445	73778	0.4414	0	77.5261	Eukaryota	89533.0	0	Chordata	89533.0	0	Carnivora	89533.0	0	Canidae	89533.0	0	Canis	89533.0	0	Canis lupus	89533.0	0
scf7180000050371	30123	0.3826	0	59.9902	Eukaryota	16818.0	0	Chordata	16818.0	0	Carnivora	16818.0	0	Canidae	16818.0	0	Canis	16818.0	0	Canis lupus	16818.0	0
scf7180000043199	527794	0.3368	0	58.0863	Eukaryota	75419.0	0	Chordata	75419.0	0	Carnivora	75419.0	0	Canidae	75419.0	0	Canis	75419.0	0	Canis lupus	75419.0	0
scf7180000053689	6786	0.4524	0	1193.0301	Eukaryota	425.0	0	Platyhelminthes	425.0	0	Polystomatidea	425.0	0	Polystomatidae	425.0	0	Protopolystoma	425.0	0	Protopolystoma xenopodis	425.0	0
scf7180000043151	435094	0.4144	0	58.4225	Eukaryota	42176.0	0	Chordata	42176.0	0	Carnivora	42176.0	0	Canidae	42176.0	0	Canis	42176.0	0	Canis lupus	42176.0	0
scf7180000048753	4785	0.4568	0	226.9634	Eukaryota	25697.0	0	Platyhelminthes	12982.0	1	Strigeidida	10398.0	4	Schistosomatidae	10398.0	4	Schistosoma	10398.0	4	Schistosoma mansoni	10398.0	4
scf7180000055159	11870	0.4486	0	168.484	Eukaryota	2929.0	0	Chordata	2929.0	0	Carnivora	2929.0	0	Canidae	2929.0	0	Canis	2929.0	0	Canis lupus	2929.0	0
scf7180000054790	14429	0.4784	0	274.2938	Eukaryota	18723.0	0	Chordata	18723.0	0	Carnivora	18723.0	0	Canidae	18723.0	0	Canis	18723.0	0	Canis lupus	18723.0	0
scf7180000048053	14728	0.4405	0	90.9032	Eukaryota	3434.0	0	Platyhelminthes	1533.0	2	Polystomatidea	1533.0	2	Polystomatidae	1533.0	2	Protopolystoma	1533.0	2	Protopolystoma xenopodis	1533.0	2
scf7180000043993	28235	0.4476	0	55.0204	Eukaryota	7473.0	0	Chordata	7473.0	0	Carnivora	7473.0	0	Felidae	5983.0	2	Lynx	2390.0	4	Lynx canadensis	2390.0	4
scf7180000042319	65396	0.399	0	52.9202	Eukaryota	90178.0	0	Chordata	90178.0	0	Carnivora	90178.0	0	Canidae	90178.0	0	Canis	90178.0	0	Canis lupus	90178.0	0
scf7180000043508	415812	0.5225	0	58.9473	Eukaryota	38703.0	0	Chordata	38703.0	0	Carnivora	38703.0	0	Canidae	38703.0	0	Canis	27909.0	1	Canis lupus	27909.0	1
scf7180000042933	589870	0.4141	0	57.5087	Eukaryota	36911.0	0	Chordata	36911.0	0	Carnivora	36911.0	0	Canidae	36911.0	0	Canis	36911.0	0	Canis lupus	36911.0	0
scf7180000055730	26967	0.4295	0	245.3674	Eukaryota	13938.0	0	Chordata	13938.0	0	Carnivora	13938.0	0	Canidae	13938.0	0	Canis	13938.0	0	Canis lupus	13938.0	0
scf7180000048565	5777	0.4464	0	513.0263	no-hit	0.0	0	no-hit	0.0	0	no-hit	0.0	0	no-hit	0.0	0	no-hit	0.0	0	no-hit	0.0	0
scf7180000056343	870764	0.4362	0	58.8248	Eukaryota	63525.0	0	Chordata	63525.0	0	Carnivora	63525.0	0	Canidae	58459.0	1	Canis	39364.0	2	Canis lupus	39364.0	2
scf7180000044728	4663	0.3841	0	44.2811	Eukaryota	3004.0	0	Chordata	3004.0	0	Carnivora	3004.0	0	Canidae	3004.0	0	Canis	3004.0	0	Canis lupus	3004.0	0
scf7180000056510	257898	0.4383	0	58.7402	Eukaryota	82392.0	0	Chordata	82392.0	0	Carnivora	82392.0	0	Canidae	82392.0	0	Canis	82392.0	0	Canis lupus	82392.0	0
scf7180000055587	20550	0.4478	0	138.1561	Eukaryota	492.0	0	Chordata	492.0	0	Beloniformes	492.0	0	Adrianichthyidae	492.0	0	Oryzias	492.0	0	Oryzias latipes	492.0	0
scf7180000052363	13366	0.4515	0	118.4473	Eukaryota	3459.0	0	Platyhelminthes	2607.0	1	Polystomatidea	2607.0	2	Polystomatidae	2607.0	2	Protopolystoma	2607.0	2	Protopolystoma xenopodis	2607.0	2
scf7180000041237	48826	0.3694	0	55.4694	Eukaryota	22803.0	0	Chordata	22803.0	0	Carnivora	22803.0	0	Canidae	22803.0	0	Canis	22803.0	0	Canis lupus	22803.0	0
scf7180000043059	389517	0.4105	0	57.9726	Eukaryota	56560.0	0	Chordata	56560.0	0	Carnivora	56560.0	0	Phocidae	17979.0	3	Leptonychotes	17979.0	3	Leptonychotes weddellii	17979.0	3
scf7180000047123	3205	0.4393	0	89.554	no-hit	0.0	0	no-hit	0.0	0	no-hit	0.0	0	no-hit	0.0	0	no-hit	0.0	0	no-hit	0.0	0
scf7180000050753	10376	0.4446	0	96.5034	Eukaryota	285.0	0	Chordata	285.0	0	Tetraodontiformes	285.0	0	Tetraodontidae	285.0	0	Takifugu	285.0	0	Takifugu rubripes	285.0	0
scf7180000056438	363507	0.3399	0	59.0057	Eukaryota	71845.0	0	Chordata	71845.0	0	Carnivora	71845.0	0	Canidae	71845.0	0	Canis	71845.0	0	Canis lupus	71845.0	0
scf7180000044518	278195	0.509	0	58.5936	Eukaryota	69303.0	0	Chordata	69303.0	0	Carnivora	69303.0	0	Canidae	69303.0	0	Canis	69303.0	0	Canis lupus	69303.0	0
scf7180000040593	629467	0.3716	0	59.7183	Eukaryota	94555.0	0	Chordata	94555.0	0	Carnivora	94555.0	0	Canidae	94555.0	0	Canis	94555.0	0	Canis lupus	94555.0	0
scf7180000049542	2451	0.43	0	64.6033	no-hit	0.0	0	no-hit	0.0	0	no-hit	0.0	0	no-hit	0.0	0	no-hit	0.0	0	no-hit	0.0	0
scf7180000055410	19258	0.4394	0	297.3698	Eukaryota	998.0	0	Platyhelminthes	998.0	0	Polystomatidea	998.0	0	Polystomatidae	998.0	0	Protopolystoma	998.0	0	Protopolystoma xenopodis	998.0	0
scf7180000042115	713214	0.3957	0	59.5551	Eukaryota	37046.0	0	Chordata	37046.0	0	Carnivora	37046.0	0	Canidae	37046.0	0	Canis	28926.0	1	Canis lupus	28926.0	1
scf7180000056181	923259	0.4011	0	59.8042	Eukaryota	77116.0	0	Chordata	77116.0	0	Carnivora	77116.0	0	Canidae	38663.0	2	Ailuropoda	30584.0	3	Ailuropoda melanoleuca	30584.0	3
scf7180000056330	796453	0.4122	0	59.6982	Eukaryota	55170.0	0	Chordata	55170.0	0	Carnivora	55170.0	0	Canidae	55170.0	0	Canis	55170.0	0	Canis lupus	55170.0	0
scf7180000042330	426167	0.4862	0	55.8743	Eukaryota	50082.0	0	Chordata	50082.0	0	Carnivora	50082.0	0	Canidae	50082.0	0	Canis	50082.0	0	Canis lupus	50082.0	0
scf7180000049482	2109	0.4457	0	356.8898	Eukaryota	789.0	0	Chordata	789.0	0	Kurtiformes	789.0	0	Apogonidae	789.0	0	Sphaeramia	789.0	0	Sphaeramia orbicularis	789.0	0
scf7180000042194	28010	0.4318	0	55.6621	Eukaryota	40162.0	0	Chordata	40162.0	0	Carnivora	40162.0	0	Canidae	40162.0	0	Canis	36226.0	1	Canis lupus	36226.0	1
scf7180000048927	4619	0.5025	0	123.1233	Eukaryota	8572.0	0	Chordata	8572.0	0	Carnivora	8572.0	0	Canidae	8572.0	0	Canis	6395.0	1	Canis lupus	5201.0	2
scf7180000041924	784677	0.475	0	59.4123	Eukaryota	64658.0	0	Chordata	64658.0	0	Carnivora	64658.0	0	Canidae	64658.0	0	Canis	55736.0	1	Canis lupus	55736.0	1
scf7180000044552	327334	0.3803	0	60.6297	Eukaryota	92603.0	0	Chordata	92603.0	0	Carnivora	92603.0	0	Canidae	92603.0	0	Canis	92603.0	0	Canis lupus	92603.0	0
scf7180000044359	281496	0.3789	0	61.3166	Eukaryota	35103.0	0	Chordata	35103.0	0	Carnivora	35103.0	0	Canidae	35103.0	0	Canis	35103.0	0	Canis lupus	35103.0	0
scf7180000044843	237178	0.6067	0	55.7398	Eukaryota	39500.0	0	Chordata	39500.0	0	Carnivora	39500.0	0	Canidae	39500.0	0	Vulpes	27319.0	1	Vulpes vulpes	27319.0	1
scf7180000044795	256941	0.5204	0	58.2278	Eukaryota	48475.0	0	Chordata	48475.0	0	Carnivora	48475.0	0	Canidae	48475.0	0	Canis	42831.0	1	Canis lupus	42831.0	1
scf7180000042729	634634	0.3843	0	58.9707	Eukaryota	66041.0	0	Chordata	66041.0	0	Carnivora	66041.0	0	Canidae	66041.0	0	Canis	66041.0	0	Canis lupus	66041.0	0
scf7180000046660	109265	0.3494	0	58.6774	Eukaryota	14268.0	0	Chordata	14268.0	0	Carnivora	14268.0	0	Otariidae	4278.0	5	Leptonychotes	1469.0	9	Leptonychotes weddellii	1469.0	9
scf7180000045413	44569	0.3667	0	55.6238	Eukaryota	54300.0	0	Chordata	54300.0	0	Carnivora	54300.0	0	Canidae	54300.0	0	Canis	54300.0	0	Canis lupus	54300.0	0
scf7180000050394	27742	0.3998	0	59.647	Eukaryota	3396.0	0	Chordata	3396.0	0	Carnivora	3396.0	0	Canidae	3045.0	1	Canis	3045.0	1	Canis lupus	3045.0	1
scf7180000049122	37379	0.4982	0	59.299	Eukaryota	14711.0	0	Chordata	14711.0	0	Carnivora	14711.0	0	Canidae	10577.0	1	Canis	10577.0	1	Canis lupus	10577.0	1
scf7180000056544	211582	0.3414	0	58.9132	Eukaryota	91260.0	0	Chordata	91260.0	0	Carnivora	91260.0	0	Canidae	91260.0	0	Canis	91260.0	0	Canis lupus	91260.0	0
scf7180000047968	53946	0.5001	0	57.86	Eukaryota	65779.0	0	Chordata	65779.0	0	Carnivora	65779.0	0	Felidae	36855.0	1	Felis	36855.0	2	Felis catus	36855.0	2
scf7180000053521	6699	0.4878	0	91.6531	Eukaryota	31725.0	0	Chordata	31725.0	0	Carnivora	31725.0	0	Canidae	31725.0	0	Canis	31725.0	0	Canis lupus	31725.0	0
scf7180000055510	3948	0.4354	0	82.2903	Eukaryota	13455.0	0	Chordata	9694.0	1	Strigeidida	3761.0	4	Schistosomatidae	3761.0	4	Schistosoma	3761.0	5	Schistosoma mansoni	3761.0	6
scf7180000047417	31973	0.4612	0	179.816	Eukaryota	1468.0	0	Platyhelminthes	856.0	1	Polystomatidea	856.0	1	Polystomatidae	856.0	1	Protopolystoma	856.0	1	Protopolystoma xenopodis	856.0	1
scf7180000048682	18936	0.4432	0	141.0682	Eukaryota	5991.0	1	Chordata	4983.0	2	Salmoniformes	3202.0	5	Salmonidae	3202.0	5	Salmo	2935.0	6	Salmo trutta	2935.0	6
scf7180000040574	2240840	0.3567	0	60.6311	Eukaryota	94499.0	0	Chordata	94499.0	0	Carnivora	94499.0	0	Canidae	94499.0	0	Canis	94499.0	0	Canis lupus	94499.0	0
scf7180000050435	24147	0.4142	0	57.1581	Eukaryota	4392.0	0	Chordata	4392.0	0	Carnivora	4392.0	0	Canidae	4392.0	0	Canis	4392.0	0	Canis lupus	4392.0	0
scf7180000046158	20062	0.4539	0	209.5869	Eukaryota	88342.0	0	Chordata	88342.0	0	Carnivora	88342.0	0	Canidae	88342.0	0	Canis	88342.0	0	Canis lupus	88342.0	0
scf7180000054933	8677	0.4385	0	144.8938	no-hit	0.0	0	no-hit	0.0	0	no-hit	0.0	0	no-hit	0.0	0	no-hit	0.0	0	no-hit	0.0	0
scf7180000043537	410383	0.4255	0	60.2334	Eukaryota	96330.0	0	Chordata	96330.0	0	Carnivora	96330.0	0	Canidae	96330.0	0	Canis	96330.0	0	Canis lupus	96330.0	0
scf7180000052414	11975	0.5061	0	581.1173	Eukaryota	9138.0	0	Chordata	9138.0	0	Carnivora	9138.0	0	Canidae	9138.0	0	Canis	7411.0	1	Canis lupus	6156.0	2
scf7180000051529	9044	0.5036	0	35.7066	Eukaryota	8141.0	0	Chordata	8141.0	0	Carnivora	8141.0	0	Canidae	8141.0	0	Canis	6108.0	1	Canis lupus	4964.0	2
scf7180000056324	785823	0.3474	0	59.5386	Eukaryota	76088.0	0	Chordata	76088.0	0	Carnivora	76088.0	0	Canidae	76088.0	0	Canis	76088.0	0	Canis lupus	76088.0	0
scf7180000047245	89817	0.472	0	59.1754	Eukaryota	41786.0	0	Chordata	41786.0	0	Carnivora	41786.0	0	Canidae	41786.0	0	Canis	36269.0	1	Canis lupus	36269.0	1
scf7180000048585	46593	0.6774	0	52.1659	Eukaryota	26466.0	0	Chordata	26466.0	0	Carnivora	26466.0	0	Canidae	22990.0	1	Canis	22990.0	2	Canis lupus	22990.0	2
scf7180000053983	5365	0.4578	0	64.9939	no-hit	0.0	0	no-hit	0.0	0	no-hit	0.0	0	no-hit	0.0	0	no-hit	0.0	0	no-hit	0.0	0
scf7180000055544	8225	0.4398	0	134.1111	Eukaryota	36493.0	0	Chordata	24584.0	2	Gadiformes	19787.0	5	Gadidae	19787.0	5	Gadus	19787.0	5	Gadus morhua	19787.0	5
scf7180000048787	21928	0.4475	0	271.0347	Eukaryota	709.0	0	Platyhelminthes	435.0	1	Polystomatidea	435.0	1	Polystomatidae	435.0	1	Protopolystoma	435.0	1	Protopolystoma xenopodis	435.0	1
scf7180000050811	14976	0.4062	0	386.3219	Eukaryota	34604.0	0	Chordata	34604.0	0	Carnivora	34604.0	0	Canidae	34604.0	0	Canis	34604.0	0	Canis lupus	34604.0	0
scf7180000041838	470162	0.3498	0	59.0165	Eukaryota	130769.0	0	Chordata	130769.0	0	Carnivora	130769.0	0	Canidae	130769.0	0	Canis	130769.0	0	Canis lupus	130769.0	0
scf7180000044609	159250	0.406	0	58.1794	Eukaryota	79743.0	0	Chordata	79743.0	0	Carnivora	79743.0	0	Canidae	79743.0	0	Canis	79743.0	0	Canis lupus	79743.0	0
scf7180000044412	22882	0.4441	0	279.9658	Eukaryota	972.0	0	Chordata	620.0	1	Salmoniformes	414.0	2	Salmonidae	414.0	2	Coregonus	414.0	2	Coregonus sp. 'balchen'	414.0	2
scf7180000056173	3445228	0.3852	0	60.4835	Eukaryota	101760.0	0	Chordata	101760.0	0	Carnivora	101760.0	0	Canidae	101760.0	0	Canis	101760.0	0	Canis lupus	101760.0	0
scf7180000044914	111316	0.3907	0	61.7093	Eukaryota	47567.0	0	Chordata	47567.0	0	Carnivora	47567.0	0	Canidae	47567.0	0	Canis	47567.0	0	Canis lupus	47567.0	0
scf7180000047212	43808	0.4598	0	56.8633	Eukaryota	38337.0	0	Chordata	38337.0	0	Carnivora	38337.0	0	Canidae	38337.0	0	Canis	38337.0	0	Canis lupus	38337.0	0
scf7180000052253	13344	0.5311	0	56.5229	Eukaryota	2002.0	0	Chordata	2002.0	0	Carnivora	1177.0	2	Canidae	1177.0	2	Canis	1177.0	2	Canis lupus	1177.0	2
scf7180000053514	1829	0.4511	0	369.2705	no-hit	0.0	0	no-hit	0.0	0	no-hit	0.0	0	no-hit	0.0	0	no-hit	0.0	0	no-hit	0.0	0
scf7180000040850	1810380	0.3693	100	59.5031	Eukaryota	68373.0	0	Chordata	68373.0	0	Carnivora	68373.0	0	Canidae	68373.0	0	Canis	68373.0	0	Canis lupus	68373.0	0
scf7180000047308	95278	0.4499	0	58.6404	Eukaryota	29300.0	0	Chordata	29300.0	0	Carnivora	21236.0	1	Canidae	9257.0	4	Canis	6121.0	6	Canis lupus	6121.0	7
scf7180000047675	5709	0.4276	0	57.5679	Eukaryota	1815.0	0	Platyhelminthes	1345.0	1	Polystomatidea	1345.0	1	Polystomatidae	1345.0	1	Protopolystoma	1345.0	1	Protopolystoma xenopodis	1345.0	1
scf7180000052259	7789	0.5066	0	346.3616	Eukaryota	9080.0	0	Chordata	9080.0	0	Carnivora	9080.0	0	Canidae	9080.0	0	Canis	7348.0	1	Canis lupus	6078.0	2
scf7180000042625	258796	0.428	0	60.4443	Eukaryota	96813.0	0	Chordata	96813.0	0	Carnivora	96813.0	0	Canidae	96813.0	0	Canis	96813.0	0	Canis lupus	96813.0	0
scf7180000054440	46279	0.4431	0	460.0808	Eukaryota	66419.0	0	Chordata	46021.0	2	Gadiformes	39425.0	5	Gadidae	39425.0	5	Gadus	39425.0	5	Gadus morhua	39425.0	5
scf7180000040767	112265	0.3842	100	56.6255	Eukaryota	61153.0	0	Chordata	61153.0	0	Carnivora	61153.0	0	Canidae	61153.0	0	Canis	61153.0	0	Canis lupus	61153.0	0
scf7180000052128	10319	0.441	0	190.8829	Eukaryota	8868.0	0	Chordata	7951.0	1	Tetraodontiformes	5003.0	2	Tetraodontidae	5003.0	2	Takifugu	4620.0	3	Takifugu rubripes	4620.0	3
scf7180000046495	23434	0.4412	0	96.3075	Eukaryota	1608.0	0	Chordata	1608.0	0	Tetraodontiformes	1002.0	1	Tetraodontidae	1002.0	1	Takifugu	1002.0	1	Takifugu rubripes	1002.0	1
scf7180000053875	4673	0.4415	0	311.0866	no-hit	0.0	0	no-hit	0.0	0	no-hit	0.0	0	no-hit	0.0	0	no-hit	0.0	0	no-hit	0.0	0
scf7180000048986	29760	0.4527	0	1289.5218	Eukaryota	7555.0	0	Chordata	4384.0	2	Salmoniformes	3367.0	4	Salmonidae	3367.0	4	Salmo	3367.0	4	Salmo trutta	3367.0	4
scf7180000045192	98382	0.476	0	60.4708	Eukaryota	37482.0	0	Chordata	37482.0	0	Carnivora	37482.0	0	Canidae	24430.0	3	Canis	21532.0	6	Canis lupus	21532.0	6
scf7180000047100	23121	0.4343	0	272.041	Eukaryota	53973.0	0	Chordata	53973.0	0	Carnivora	53973.0	0	Canidae	53973.0	0	Canis	53973.0	0	Canis lupus	53973.0	0
scf7180000050214	8335	0.3677	0	25.7252	Eukaryota	40853.0	0	Chordata	40853.0	0	Carnivora	40853.0	0	Canidae	40853.0	0	Canis	40853.0	0	Canis lupus	40853.0	0
scf7180000042449	448670	0.4198	0	60.1015	Eukaryota	32916.0	0	Chordata	32916.0	0	Carnivora	32916.0	0	Canidae	32916.0	0	Canis	32916.0	0	Canis lupus	32916.0	0
scf7180000049079	54403	0.4397	0	41.3623	Eukaryota	90648.0	0	Chordata	90648.0	0	Carnivora	90648.0	0	Canidae	90648.0	0	Canis	90648.0	0	Canis lupus	90648.0	0
scf7180000047717	7072	0.4429	0	38.249	Eukaryota	29268.0	0	Chordata	24129.0	2	Gadiformes	14558.0	6	Gadidae	14558.0	6	Gadus	14558.0	6	Gadus morhua	14558.0	6
scf7180000041766	801770	0.4031	0	59.6781	Eukaryota	53266.0	0	Chordata	53266.0	0	Carnivora	53266.0	0	Canidae	53266.0	0	Canis	53266.0	0	Canis lupus	53266.0	0
scf7180000051763	5676	0.4468	0	478.0749	no-hit	0.0	0	no-hit	0.0	0	no-hit	0.0	0	no-hit	0.0	0	no-hit	0.0	0	no-hit	0.0	0
scf7180000047723	62051	0.5026	0	58.6204	Eukaryota	12767.0	0	Chordata	12767.0	0	Carnivora	12767.0	0	Canidae	6051.0	3	Canis	4019.0	8	Canis lupus	4019.0	8
scf7180000050578	13381	0.453	0	1223.9833	Eukaryota	10029.0	0	Chordata	8222.0	2	Synbranchiformes	3407.0	7	Mastacembelidae	3407.0	7	Mastacembelus	3407.0	8	Mastacembelus armatus	3407.0	8
scf7180000044458	325080	0.3584	0	59.7606	Eukaryota	83429.0	0	Chordata	83429.0	0	Carnivora	83429.0	0	Canidae	83429.0	0	Canis	83429.0	0	Canis lupus	83429.0	0
scf7180000042350	136609	0.3799	0	57.4604	Eukaryota	51182.0	0	Chordata	51182.0	0	Carnivora	51182.0	0	Canidae	41921.0	3	Canis	41921.0	3	Canis lupus	41921.0	3
scf7180000050231	5437	0.4455	0	86.1969	Eukaryota	198.0	0	Platyhelminthes	198.0	0	Polystomatidea	198.0	0	Polystomatidae	198.0	0	Protopolystoma	198.0	0	Protopolystoma xenopodis	198.0	0
scf7180000045031	27078	0.4315	0	44.8304	Eukaryota	3659.0	0	Chordata	3659.0	0	Carnivora	2402.0	2	Canidae	2402.0	2	Canis	2402.0	2	Canis lupus	2402.0	2
scf7180000045574	7140	0.4339	0	34.6228	Eukaryota	6179.0	0	Chordata	5280.0	1	Kurtiformes	3142.0	3	Apogonidae	3142.0	3	Sphaeramia	3142.0	3	Sphaeramia orbicularis	3142.0	3
scf7180000045570	197500	0.4195	0	58.7954	Eukaryota	42149.0	0	Chordata	42149.0	0	Carnivora	42149.0	0	Canidae	42149.0	0	Canis	42149.0	0	Canis lupus	42149.0	0
scf7180000044549	232989	0.5149	0	57.4148	Eukaryota	28265.0	0	Chordata	28265.0	0	Carnivora	28265.0	0	Canidae	28265.0	0	Canis	25461.0	1	Canis lupus	25461.0	1
scf7180000047405	8209	0.4427	0	253.3234	Eukaryota	1509.0	0	Platyhelminthes	1359.0	1	Polystomatidea	1359.0	1	Polystomatidae	1359.0	1	Protopolystoma	1359.0	1	Protopolystoma xenopodis	1359.0	1
scf7180000050236	19978	0.5062	0	135.4038	Eukaryota	32856.0	0	Chordata	32856.0	0	Carnivora	32856.0	0	Canidae	32856.0	0	Canis	32856.0	0	Canis lupus	32856.0	0
scf7180000041245	222356	0.4409	0	58.4249	Eukaryota	50660.0	0	Chordata	50660.0	0	Carnivora	47033.0	1	Canidae	31076.0	4	Canis	25980.0	5	Canis lupus	25980.0	5
scf7180000052063	16301	0.4458	0	149.6641	Eukaryota	29395.0	0	Chordata	25326.0	1	Gadiformes	13566.0	5	Gadidae	13566.0	5	Gadus	13566.0	5	Gadus morhua	13566.0	5
scf7180000051745	5945	0.4486	0	61.52	Eukaryota	846.0	0	Platyhelminthes	846.0	0	Polystomatidea	846.0	0	Polystomatidae	846.0	0	Protopolystoma	846.0	0	Protopolystoma xenopodis	846.0	0
scf7180000051826	19723	0.437	0	97.303	Eukaryota	39024.0	0	Platyhelminthes	22468.0	2	Cyclophyllidea	11651.0	5	Hymenolepididae	11651.0	5	Hymenolepis	11651.0	5	Hymenolepis microstoma	11651.0	5
scf7180000055614	14213	0.443	0	241.0948	Eukaryota	17641.0	1	Chordata	15356.0	3	Gadiformes	9747.0	7	Gadidae	9747.0	7	Gadus	9747.0	7	Gadus morhua	9747.0	7
scf7180000049444	4643	0.4495	0	48.4511	Eukaryota	1724.0	0	Platyhelminthes	1030.0	1	Polystomatidea	1030.0	2	Polystomatidae	1030.0	2	Protopolystoma	1030.0	2	Protopolystoma xenopodis	1030.0	2
scf7180000041292	175742	0.3728	0	61.1736	Eukaryota	16073.0	0	Chordata	16073.0	0	Primates	8493.0	2	Hominidae	8493.0	3	Homo	8493.0	3	Homo sapiens	8493.0	3
scf7180000048845	46699	0.3619	0	54.4157	Eukaryota	59798.0	0	Chordata	59798.0	0	Carnivora	59798.0	0	Canidae	59798.0	0	Canis	59798.0	0	Canis lupus	59798.0	0
scf7180000046200	155499	0.5554	0	57.8022	Eukaryota	58533.0	0	Chordata	58533.0	0	Carnivora	58533.0	0	Canidae	54464.0	2	Canis	47640.0	3	Canis lupus	47640.0	3
scf7180000046407	74596	0.4403	0	122.2096	Eukaryota	79191.0	0	Chordata	79191.0	0	Carnivora	79191.0	0	Canidae	79191.0	0	Canis	79191.0	0	Canis lupus	79191.0	0
scf7180000056483	16582	0.4384	0	119.3437	Eukaryota	37365.0	0	Chordata	27078.0	2	Gadiformes	24903.0	5	Gadidae	24903.0	5	Gadus	24903.0	5	Gadus morhua	24903.0	5
scf7180000047582	11636	0.4377	0	79.2887	no-hit	0.0	0	no-hit	0.0	0	no-hit	0.0	0	no-hit	0.0	0	no-hit	0.0	0	no-hit	0.0	0
scf7180000046883	7102	0.3662	0	32.9395	Eukaryota	6055.0	0	Chordata	6055.0	0	Carnivora	5321.0	1	Canidae	5321.0	1	Canis	5321.0	1	Canis lupus	5321.0	1
scf7180000046346	135192	0.3574	0	59.77	Eukaryota	23635.0	0	Chordata	23635.0	0	Carnivora	23635.0	0	Canidae	23635.0	0	Canis	23635.0	0	Canis lupus	23635.0	0
scf7180000046122	37805	0.5631	0	54.6936	Eukaryota	8995.0	0	Chordata	8995.0	0	Carnivora	8995.0	0	Felidae	4487.0	2	Panthera	2103.0	5	Panthera pardus	2103.0	5
scf7180000045666	180047	0.6105	0	55.5348	Eukaryota	9417.0	0	Chordata	9417.0	0	Carnivora	9417.0	0	Canidae	7942.0	1	Canis	7942.0	2	Canis lupus	7942.0	2
scf7180000042191	738073	0.463	0	59.0034	Eukaryota	74071.0	0	Chordata	74071.0	0	Carnivora	74071.0	0	Canidae	74071.0	0	Canis	51793.0	1	Canis lupus	51793.0	1
scf7180000046638	122074	0.3493	0	60.9095	Eukaryota	90619.0	0	Chordata	90619.0	0	Carnivora	90619.0	0	Canidae	90619.0	0	Canis	90619.0	0	Canis lupus	90619.0	0
scf7180000046378	145371	0.4257	0	59.2982	Eukaryota	23232.0	0	Chordata	23232.0	0	Carnivora	23232.0	0	Felidae	8530.0	3	Mustela	4526.0	6	Mustela putorius	4526.0	6
scf7180000045834	169006	0.4526	0	56.1258	Eukaryota	91465.0	0	Chordata	91465.0	0	Carnivora	91465.0	0	Canidae	91465.0	0	Canis	91465.0	0	Canis lupus	91465.0	0
scf7180000053703	8325	0.504	0	81.9413	Eukaryota	7432.0	0	Chordata	7432.0	0	Carnivora	7432.0	0	Canidae	7432.0	0	Canis	5380.0	1	Canis lupus	4333.0	2
scf7180000051756	7784	0.4451	0	66.3415	Eukaryota	3202.0	0	Chordata	2668.0	1	Carnivora	2668.0	1	Canidae	2668.0	1	Canis	2668.0	1	Canis lupus	2668.0	1
scf7180000053722	2129	0.4528	0	270.8516	no-hit	0.0	0	no-hit	0.0	0	no-hit	0.0	0	no-hit	0.0	0	no-hit	0.0	0	no-hit	0.0	0
scf7180000053000	4160	0.4397	0	99.4583	Eukaryota	2806.0	0	Chordata	2806.0	0	Carnivora	2806.0	0	Canidae	2806.0	0	Canis	2806.0	0	Canis lupus	2806.0	0
scf7180000049473	13648	0.5188	0	398.0298	Eukaryota	15758.0	0	Chordata	15758.0	0	Carnivora	15758.0	0	Canidae	15758.0	0	Canis	15758.0	0	Canis lupus	15758.0	0
scf7180000044691	272564	0.4032	0	61.7369	Eukaryota	22578.0	0	Chordata	22578.0	0	Carnivora	22578.0	0	Canidae	22578.0	0	Canis	22578.0	0	Canis lupus	22578.0	0
scf7180000042802	570777	0.481	0	58.5904	Eukaryota	98750.0	0	Chordata	98750.0	0	Carnivora	98750.0	0	Canidae	98750.0	0	Canis	69125.0	1	Canis lupus	69125.0	1
scf7180000054554	16982	0.4337	0	427.3478	Eukaryota	384.0	0	Chordata	384.0	0	Kurtiformes	230.0	1	Apogonidae	230.0	1	Sphaeramia	230.0	1	Sphaeramia orbicularis	230.0	1
scf7180000049942	29420	0.4443	0	150.3462	Eukaryota	3227.0	0	Platyhelminthes	1629.0	1	Polystomatidea	1629.0	2	Polystomatidae	1629.0	2	Protopolystoma	1629.0	2	Protopolystoma xenopodis	1629.0	2
scf7180000044156	221598	0.4077	0	62.9637	Eukaryota	99981.0	0	Chordata	99981.0	0	Carnivora	99981.0	0	Canidae	99981.0	0	Canis	99981.0	0	Canis lupus	99981.0	0
scf7180000040982	1486522	0.4023	0	59.6964	Eukaryota	72731.0	0	Chordata	72731.0	0	Carnivora	72731.0	0	Canidae	72731.0	0	Canis	64648.0	1	Canis lupus	64648.0	1
scf7180000048474	36223	0.4378	0	109.919	Eukaryota	4610.0	0	Chordata	2902.0	1	Tetraodontiformes	1864.0	3	Tetraodontidae	1864.0	3	Takifugu	1864.0	3	Takifugu rubripes	1864.0	3
scf7180000043775	672888	0.4425	0	57.5214	Eukaryota	46120.0	0	Chordata	46120.0	0	Carnivora	46120.0	0	Canidae	46120.0	0	Canis	46120.0	0	Canis lupus	46120.0	0
scf7180000056160	6108	0.4473	0	101.203	Eukaryota	272.0	0	Chordata	272.0	0	Salmoniformes	272.0	0	Salmonidae	272.0	0	Coregonus	272.0	0	Coregonus sp. 'balchen'	272.0	0
scf7180000045386	10420	0.4012	0	28.5191	Eukaryota	15919.0	0	Chordata	15919.0	0	Carnivora	15919.0	0	Canidae	7839.0	2	Canis	7839.0	3	Canis lupus	7839.0	3
scf7180000050722	18143	0.4515	0	61.243	Eukaryota	3365.0	1	Chordata	3365.0	1	Primates	2216.0	3	Hominidae	2216.0	3	Homo	1931.0	4	Homo sapiens	1931.0	4
scf7180000046099	32956	0.4328	0	63.345	Eukaryota	8698.0	0	Chordata	8166.0	1	Chordata-undef	3308.0	4	Ambassidae	3308.0	4	Parambassis	3308.0	5	Parambassis ranga	3308.0	5
scf7180000044380	344053	0.3735	0	60.421	Eukaryota	26131.0	0	Chordata	26131.0	0	Carnivora	26131.0	0	Canidae	21291.0	1	Canis	21291.0	1	Canis lupus	21291.0	1
scf7180000051074	12744	0.4436	0	88.2299	Eukaryota	40482.0	0	Platyhelminthes	22433.0	2	Strigeidida	13679.0	7	Schistosomatidae	13679.0	7	Schistosoma	13679.0	7	Schistosoma mansoni	13679.0	7
scf7180000044873	95352	0.3847	0	57.6152	Eukaryota	12271.0	0	Chordata	12271.0	0	Carnivora	12271.0	0	Canidae	12271.0	0	Canis	12271.0	0	Canis lupus	12271.0	0
scf7180000040542	838162	0.4161	0	58.3692	Eukaryota	36335.0	0	Chordata	36335.0	0	Carnivora	32772.0	1	Canidae	30221.0	2	Canis	20234.0	3	Canis lupus	20234.0	3
scf7180000045111	267346	0.3439	0	60.9514	Eukaryota	47000.0	0	Chordata	47000.0	0	Carnivora	47000.0	0	Canidae	47000.0	0	Canis	47000.0	0	Canis lupus	47000.0	0
scf7180000048722	47636	0.3757	0	60.6926	Eukaryota	17683.0	0	Chordata	17683.0	0	Carnivora	17683.0	0	Canidae	15325.0	1	Canis	13884.0	2	Canis lupus	13884.0	2
scf7180000045457	208504	0.3692	0	74.4621	Eukaryota	94998.0	0	Chordata	94998.0	0	Carnivora	94998.0	0	Canidae	94998.0	0	Canis	94998.0	0	Canis lupus	94998.0	0
scf7180000052953	6312	0.4426	0	326.736	Eukaryota	263.0	0	Platyhelminthes	263.0	0	Polystomatidea	263.0	0	Polystomatidae	263.0	0	Protopolystoma	263.0	0	Protopolystoma xenopodis	263.0	0
scf7180000052800	2347	0.444	0	192.1977	Eukaryota	862.0	0	Platyhelminthes	862.0	0	Polystomatidea	862.0	0	Polystomatidae	862.0	0	Protopolystoma	862.0	0	Protopolystoma xenopodis	862.0	0
scf7180000048334	9438	0.4408	0	89.0829	Eukaryota	3301.0	0	Chordata	2277.0	2	Kurtiformes	1554.0	3	Apogonidae	1554.0	3	Sphaeramia	1554.0	3	Sphaeramia orbicularis	1554.0	3
scf7180000044296	344949	0.3757	0	59.8088	Eukaryota	51586.0	0	Chordata	51586.0	0	Carnivora	51586.0	0	Canidae	51586.0	0	Canis	51586.0	0	Canis lupus	51586.0	0
scf7180000051112	5861	0.4424	0	64.3108	Eukaryota	6445.0	0	Chordata	3343.0	1	Polystomatidea	3102.0	3	Polystomatidae	3102.0	3	Protopolystoma	3102.0	3	Protopolystoma xenopodis	3102.0	3
scf7180000042135	208376	0.4599	0	61.5891	Eukaryota	93162.0	0	Chordata	93162.0	0	Carnivora	93162.0	0	Canidae	93162.0	0	Canis	93162.0	0	Canis lupus	93162.0	0
scf7180000045792	154616	0.6709	0	53.7061	Eukaryota	56090.0	0	Chordata	56090.0	0	Carnivora	56090.0	0	Canidae	56090.0	0	Canis	56090.0	0	Canis lupus	56090.0	0
scf7180000046065	181339	0.3896	0	60.2003	Eukaryota	63112.0	0	Chordata	63112.0	0	Carnivora	63112.0	0	Canidae	45693.0	2	Canis	25632.0	4	Canis lupus	25632.0	4
scf7180000045240	242025	0.4216	0	59.9509	Eukaryota	61338.0	0	Chordata	61338.0	0	Carnivora	61338.0	0	Canidae	61338.0	0	Canis	61338.0	0	Canis lupus	61338.0	0
scf7180000040964	44422	0.3912	0	55.4095	Eukaryota	3993.0	0	Chordata	3993.0	0	Carnivora	2064.0	2	Canidae	2064.0	2	Canis	2064.0	2	Canis lupus	2064.0	2
scf7180000040880	1776684	0.3576	100	60.263	Eukaryota	91285.0	0	Chordata	91285.0	0	Carnivora	91285.0	0	Canidae	91285.0	0	Canis	91285.0	0	Canis lupus	91285.0	0
scf7180000042373	484462	0.4001	0	59.0639	Eukaryota	93777.0	0	Chordata	93777.0	0	Carnivora	93777.0	0	Canidae	93777.0	0	Canis	93777.0	0	Canis lupus	93777.0	0
scf7180000050732	6783	0.4426	0	97.27	Eukaryota	461.0	0	Platyhelminthes	461.0	0	Polystomatidea	461.0	0	Polystomatidae	461.0	0	Protopolystoma	461.0	0	Protopolystoma xenopodis	461.0	0
scf7180000053024	6612	0.4527	0	1029.6951	Eukaryota	2488.0	0	Chordata	2488.0	0	Carnivora	2220.0	1	Canidae	2220.0	1	Canis	1974.0	2	Canis lupus	1974.0	2
scf7180000053635	2304	0.4384	0	1455.1427	no-hit	0.0	0	no-hit	0.0	0	no-hit	0.0	0	no-hit	0.0	0	no-hit	0.0	0	no-hit	0.0	0
scf7180000046890	16143	0.3974	0	51.0748	Eukaryota	89680.0	0	Chordata	89680.0	0	Carnivora	89680.0	0	Canidae	89680.0	0	Canis	89680.0	0	Canis lupus	89680.0	0
scf7180000054107	3218	0.4198	0	161.2414	Eukaryota	141.0	0	Platyhelminthes	141.0	0	Polystomatidea	141.0	0	Polystomatidae	141.0	0	Protopolystoma	141.0	0	Protopolystoma xenopodis	141.0	0
scf7180000046072	11831	0.3711	0	48.4761	Eukaryota	79292.0	0	Chordata	79292.0	0	Carnivora	79292.0	0	Canidae	79292.0	0	Canis	79292.0	0	Canis lupus	79292.0	0
scf7180000040533	2948507	0.413	100	60.2374	Eukaryota	166229.0	0	Chordata	166229.0	0	Carnivora	166229.0	0	Canidae	166229.0	0	Canis	166229.0	0	Canis lupus	166229.0	0
scf7180000040569	2119176	0.3912	0	59.7145	Eukaryota	93777.0	0	Chordata	93777.0	0	Carnivora	93777.0	0	Canidae	93777.0	0	Canis	93777.0	0	Canis lupus	93777.0	0
scf7180000043028	62978	0.3823	0	58.9889	Eukaryota	69778.0	0	Chordata	69778.0	0	Carnivora	69778.0	0	Canidae	69778.0	0	Canis	47835.0	1	Canis lupus	47835.0	1
scf7180000048969	10386	0.4487	0	76.5797	Eukaryota	2684.0	0	Chordata	2684.0	0	Carnivora	2684.0	0	Canidae	2684.0	0	Canis	2684.0	0	Canis lupus	2684.0	0
scf7180000044385	1988	0.4502	0	466.9002	Eukaryota	1810.0	0	Platyhelminthes	672.0	3	Polystomatidea	672.0	3	Polystomatidae	672.0	3	Protopolystoma	672.0	3	Protopolystoma xenopodis	672.0	3
scf7180000054299	22775	0.4426	0	118.055	Eukaryota	2049.0	0	Chordata	1814.0	1	Kurtiformes	1369.0	3	Apogonidae	1369.0	3	Sphaeramia	1369.0	3	Sphaeramia orbicularis	1369.0	3
scf7180000050805	4855	0.4453	0	202.7878	no-hit	0.0	0	no-hit	0.0	0	no-hit	0.0	0	no-hit	0.0	0	no-hit	0.0	0	no-hit	0.0	0
scf7180000055597	25168	0.4385	0	203.6003	Eukaryota	86398.0	0	Platyhelminthes	44842.0	1	Strigeidida	32742.0	4	Schistosomatidae	32742.0	4	Schistosoma	32742.0	4	Schistosoma mansoni	32742.0	4
scf7180000042276	383520	0.4411	0	58.2868	Eukaryota	57007.0	0	Chordata	57007.0	0	Carnivora	57007.0	0	Canidae	57007.0	0	Canis	57007.0	0	Canis lupus	57007.0	0
scf7180000043102	28625	0.3871	0	63.8977	Eukaryota	48700.0	0	Chordata	48700.0	0	Carnivora	48700.0	0	Canidae	48700.0	0	Canis	48700.0	0	Canis lupus	48700.0	0
scf7180000043263	677440	0.3529	100	60.3274	Eukaryota	93768.0	0	Chordata	93768.0	0	Carnivora	93768.0	0	Canidae	93768.0	0	Canis	93768.0	0	Canis lupus	93768.0	0
scf7180000049026	7577	0.442	0	183.4439	no-hit	0.0	0	no-hit	0.0	0	no-hit	0.0	0	no-hit	0.0	0	no-hit	0.0	0	no-hit	0.0	0
scf7180000048975	12927	0.4545	0	65.4219	Eukaryota	4490.0	0	Chordata	2605.0	1	Polystomatidea	1885.0	3	Polystomatidae	1885.0	3	Protopolystoma	1885.0	3	Protopolystoma xenopodis	1885.0	3
scf7180000048669	12862	0.4429	0	116.392	no-hit	0.0	0	no-hit	0.0	0	no-hit	0.0	0	no-hit	0.0	0	no-hit	0.0	0	no-hit	0.0	0
scf7180000044664	299760	0.4321	0	59.546	Eukaryota	95574.0	0	Chordata	95574.0	0	Carnivora	95574.0	0	Canidae	95574.0	0	Canis	86067.0	1	Canis lupus	86067.0	1
scf7180000050727	50804	0.3617	0	53.7861	Eukaryota	28615.0	0	Chordata	28615.0	0	Carnivora	28615.0	0	Canidae	28615.0	0	Canis	28615.0	0	Canis lupus	28615.0	0
scf7180000044721	302911	0.3807	0	62.0514	Eukaryota	20394.0	0	Chordata	20394.0	0	Carnivora	20394.0	0	Canidae	18443.0	1	Canis	18443.0	1	Canis lupus	18443.0	1
scf7180000056252	388872	0.4394	0	57.9617	Eukaryota	35291.0	0	Chordata	35291.0	0	Carnivora	35291.0	0	Canidae	35291.0	0	Canis	30391.0	1	Canis lupus	30391.0	1
scf7180000051689	31158	0.5026	0	1231.225	Eukaryota	9680.0	0	Chordata	9680.0	0	Carnivora	9680.0	0	Canidae	9680.0	0	Canis	8991.0	1	Canis lupus	7699.0	2
scf7180000047845	68245	0.3971	0	61.2863	Eukaryota	26210.0	0	Chordata	26210.0	0	Carnivora	26210.0	0	Canidae	26210.0	0	Canis	26210.0	0	Canis lupus	26210.0	0
scf7180000040944	90050	0.4388	0	58.0672	Eukaryota	49338.0	0	Chordata	49338.0	0	Carnivora	49338.0	0	Canidae	49338.0	0	Canis	42606.0	1	Canis lupus	42606.0	1
scf7180000043701	395389	0.4566	0	58.1999	Eukaryota	34219.0	0	Chordata	34219.0	0	Carnivora	34219.0	0	Canidae	29360.0	1	Canis	29360.0	1	Canis lupus	29360.0	1
scf7180000053552	3174	0.4543	0	874.7309	no-hit	0.0	0	no-hit	0.0	0	no-hit	0.0	0	no-hit	0.0	0	no-hit	0.0	0	no-hit	0.0	0
scf7180000044881	303621	0.3881	0	59.3296	Eukaryota	17592.0	0	Chordata	17592.0	0	Carnivora	17592.0	0	Canidae	17592.0	0	Canis	17592.0	0	Canis lupus	17592.0	0
scf7180000048143	23290	0.4443	0	223.5819	Eukaryota	3068.0	0	Chordata	3068.0	0	Carnivora	3068.0	0	Canidae	3068.0	0	Canis	3068.0	0	Canis lupus	3068.0	0
scf7180000043430	447224	0.3543	0	58.8895	Eukaryota	104565.0	0	Chordata	104565.0	0	Carnivora	104565.0	0	Canidae	104565.0	0	Canis	104565.0	0	Canis lupus	104565.0	0
scf7180000044994	274619	0.338	0	59.1368	Eukaryota	24453.0	0	Chordata	24453.0	0	Carnivora	24453.0	0	Canidae	24453.0	0	Canis	24453.0	0	Canis lupus	24453.0	0
scf7180000041442	1103222	0.3702	0	59.9909	Eukaryota	52949.0	0	Chordata	52949.0	0	Carnivora	52949.0	0	Canidae	52949.0	0	Canis	52949.0	0	Canis lupus	52949.0	0
scf7180000054992	11733	0.4378	0	95.2891	no-hit	0.0	0	no-hit	0.0	0	no-hit	0.0	0	no-hit	0.0	0	no-hit	0.0	0	no-hit	0.0	0
scf7180000042228	739559	0.3719	0	60.5016	Eukaryota	49424.0	0	Chordata	49424.0	0	Carnivora	49424.0	0	Canidae	26069.0	2	Canis	21788.0	6	Canis lupus	21788.0	6
scf7180000055176	15425	0.4433	0	123.7069	Eukaryota	12223.0	0	Chordata	11879.0	1	Tetraodontiformes	11879.0	1	Tetraodontidae	11879.0	1	Takifugu	11879.0	1	Takifugu rubripes	11879.0	1
scf7180000043814	265067	0.3681	0	59.5749	Eukaryota	14839.0	0	Chordata	14839.0	0	Primates	9512.0	2	Hominidae	7155.0	4	Homo	7155.0	4	Homo sapiens	7155.0	4
scf7180000045657	7751	0.3698	0	53.4973	Eukaryota	6348.0	0	Chordata	6348.0	0	Primates	2628.0	2	Hominidae	2628.0	2	Homo	2628.0	3	Homo sapiens	2628.0	3
scf7180000048944	8003	0.4521	0	127.5078	Eukaryota	4610.0	0	Chordata	2139.0	2	Polystomatidea	1772.0	4	Polystomatidae	1772.0	4	Protopolystoma	1772.0	5	Protopolystoma xenopodis	1772.0	5
scf7180000041790	427680	0.4015	0	58.7918	Eukaryota	95766.0	0	Chordata	95766.0	0	Carnivora	95766.0	0	Canidae	95766.0	0	Canis	95766.0	0	Canis lupus	95766.0	0
scf7180000051206	18466	0.38	0	60.7283	Eukaryota	7360.0	0	Chordata	7360.0	0	Carnivora	7360.0	0	Canidae	3023.0	3	Canis	2269.0	6	Canis lupus	2269.0	6
scf7180000041758	1064549	0.3736	0	60.7816	Eukaryota	62529.0	0	Chordata	62529.0	0	Carnivora	62529.0	0	Canidae	62529.0	0	Canis	62529.0	0	Canis lupus	62529.0	0
scf7180000052753	9115	0.4286	0	60.0657	Eukaryota	5166.0	0	Chordata	5166.0	0	Carnivora	2385.0	2	Canidae	2385.0	2	Canis	1967.0	4	Canis lupus	1967.0	4
scf7180000046532	15177	0.6205	0	32.4308	Eukaryota	4614.0	0	Chordata	4614.0	0	Carnivora	4614.0	0	Canidae	3483.0	1	Canis	1986.0	2	Canis lupus	1986.0	2
scf7180000050365	17264	0.4505	0	1355.9779	Eukaryota	14330.0	0	Chordata	14330.0	0	Tetraodontiformes	9601.0	2	Tetraodontidae	9601.0	2	Takifugu	9601.0	2	Takifugu rubripes	9601.0	2
scf7180000041988	879974	0.4197	0	59.4135	Eukaryota	58881.0	0	Chordata	58881.0	0	Carnivora	49713.0	1	Canidae	44599.0	2	Canis	24197.0	4	Canis lupus	24197.0	4
scf7180000052829	5402	0.4415	0	122.209	Eukaryota	532.0	0	Platyhelminthes	532.0	0	Polystomatidea	532.0	0	Polystomatidae	532.0	0	Protopolystoma	532.0	0	Protopolystoma xenopodis	532.0	0
scf7180000056542	250090	0.3732	0	59.4707	Eukaryota	48388.0	0	Chordata	48388.0	0	Carnivora	48388.0	0	Canidae	48388.0	0	Canis	39882.0	1	Canis lupus	39882.0	1
scf7180000047436	5069	0.4549	0	37.218	Eukaryota	1192.0	0	Chordata	920.0	1	Rodentia	422.0	3	Muridae	422.0	3	Mus	422.0	3	Mus musculus	422.0	3
scf7180000045800	14925	0.4074	0	51.2154	Eukaryota	62449.0	0	Chordata	62449.0	0	Carnivora	62449.0	0	Canidae	62449.0	0	Canis	62449.0	0	Canis lupus	62449.0	0
scf7180000052603	7374	0.4471	0	409.4181	Eukaryota	158.0	0	Streptophyta	158.0	0	Fabales	158.0	0	Fabaceae	158.0	0	Cicer	158.0	0	Cicer arietinum	158.0	0
scf7180000056035	8813	0.4384	0	115.9362	Eukaryota	1486.0	0	Platyhelminthes	952.0	1	Polystomatidea	952.0	1	Polystomatidae	952.0	1	Protopolystoma	952.0	1	Protopolystoma xenopodis	952.0	1
scf7180000042934	83836	0.4407	0	67.2241	Eukaryota	95259.0	0	Chordata	95259.0	0	Carnivora	95259.0	0	Canidae	95259.0	0	Canis	95259.0	0	Canis lupus	95259.0	0
scf7180000044393	80830	0.4463	0	57.7772	Eukaryota	80536.0	0	Chordata	80536.0	0	Carnivora	80536.0	0	Canidae	80536.0	0	Canis	80536.0	0	Canis lupus	80536.0	0
scf7180000040951	401705	0.421	0	61.4416	Eukaryota	34370.0	0	Chordata	34370.0	0	Carnivora	34370.0	0	Canidae	34370.0	0	Canis	34370.0	0	Canis lupus	34370.0	0
scf7180000048343	3714	0.4467	0	54.0544	Eukaryota	261.0	0	Platyhelminthes	261.0	0	Polystomatidea	261.0	0	Polystomatidae	261.0	0	Protopolystoma	261.0	0	Protopolystoma xenopodis	261.0	0
scf7180000040671	2020234	0.4302	0	59.5509	Eukaryota	149363.0	0	Chordata	149363.0	0	Carnivora	149363.0	0	Canidae	149363.0	0	Canis	133921.0	1	Canis lupus	133921.0	1
scf7180000043347	120385	0.4035	0	76.6561	Eukaryota	66021.0	0	Chordata	66021.0	0	Carnivora	66021.0	0	Canidae	66021.0	0	Canis	66021.0	0	Canis lupus	66021.0	0
scf7180000053405	5081	0.4389	0	255.3527	no-hit	0.0	0	no-hit	0.0	0	no-hit	0.0	0	no-hit	0.0	0	no-hit	0.0	0	no-hit	0.0	0
scf7180000046259	63630	0.4436	0	193.9285	Eukaryota	58812.0	0	Chordata	42238.0	2	Gadiformes	33805.0	5	Gadidae	33805.0	5	Gadus	33805.0	5	Gadus morhua	33805.0	5
scf7180000049985	3656	0.4303	0	48.7553	Eukaryota	12845.0	0	Chordata	12845.0	0	Carnivora	12845.0	0	Canidae	12845.0	0	Canis	12845.0	0	Canis lupus	12845.0	0
scf7180000044149	87267	0.3596	0	54.978	Eukaryota	27290.0	0	Chordata	27290.0	0	Carnivora	27290.0	0	Canidae	27290.0	0	Canis	27290.0	0	Canis lupus	27290.0	0
scf7180000049116	25591	0.3776	0	57.8019	Eukaryota	23944.0	0	Chordata	23944.0	0	Carnivora	23944.0	0	Canidae	23944.0	0	Canis	23944.0	0	Canis lupus	23944.0	0
scf7180000055802	31216	0.4495	0	106.2262	Eukaryota	189.0	0	Platyhelminthes	189.0	0	Diphyllobothriidea	189.0	0	Diphyllobothriidae	189.0	0	Dibothriocephalus	189.0	0	Dibothriocephalus latus	189.0	0
scf7180000051954	6748	0.4342	0	409.4924	Eukaryota	35780.0	0	Chordata	24788.0	2	Gadiformes	20202.0	5	Gadidae	20202.0	5	Gadus	20202.0	5	Gadus morhua	20202.0	5
scf7180000056229	883850	0.4167	0	59.6	Eukaryota	93414.0	0	Chordata	93414.0	0	Carnivora	93414.0	0	Canidae	93414.0	0	Canis	93414.0	0	Canis lupus	93414.0	0
scf7180000045944	147741	0.561	0	56.1321	Eukaryota	28138.0	0	Chordata	28138.0	0	Carnivora	28138.0	0	Canidae	28138.0	0	Canis	17105.0	1	Canis lupus	17105.0	1
scf7180000044078	413377	0.3899	0	59.8403	Eukaryota	45363.0	0	Chordata	45363.0	0	Carnivora	45363.0	0	Canidae	45363.0	0	Canis	45363.0	0	Canis lupus	45363.0	0
scf7180000051435	7840	0.4457	0	399.1558	Eukaryota	169.0	0	Chordata	169.0	0	Salmoniformes	169.0	0	Salmonidae	169.0	0	Salmo	169.0	0	Salmo trutta	169.0	0
scf7180000050164	34476	0.5969	0	52.5138	Eukaryota	13302.0	0	Chordata	13302.0	0	Carnivora	13302.0	0	Canidae	13302.0	0	Canis	8077.0	1	Canis lupus	8077.0	1
scf7180000056219	126983	0.4198	0	57.312	Eukaryota	76593.0	0	Chordata	76593.0	0	Carnivora	76593.0	0	Canidae	76593.0	0	Canis	76593.0	0	Canis lupus	76593.0	0
scf7180000048617	54925	0.4531	0	61.2584	Eukaryota	6763.0	0	Chordata	6763.0	0	Carnivora	2874.0	2	Hominidae	1894.0	5	Homo	1894.0	6	Homo sapiens	1894.0	6
scf7180000052107	3249	0.4506	0	1199.0932	no-hit	0.0	0	no-hit	0.0	0	no-hit	0.0	0	no-hit	0.0	0	no-hit	0.0	0	no-hit	0.0	0
scf7180000051659	6896	0.451	0	1133.6992	Eukaryota	174.0	0	Platyhelminthes	174.0	0	Polystomatidea	174.0	0	Polystomatidae	174.0	0	Protopolystoma	174.0	0	Protopolystoma xenopodis	174.0	0
scf7180000046573	74283	0.4351	0	309.718	Eukaryota	46722.0	0	Chordata	46722.0	0	Carnivora	46722.0	0	Canidae	46722.0	0	Canis	46722.0	0	Canis lupus	46722.0	0
scf7180000049877	22829	0.5293	0	54.2572	Eukaryota	10647.0	0	Chordata	10647.0	0	Carnivora	5879.0	3	Canidae	5879.0	4	Canis	3219.0	6	Canis lupus	3219.0	6
scf7180000043158	110170	0.3394	0	63.5724	Eukaryota	90419.0	0	Chordata	90419.0	0	Carnivora	90419.0	0	Canidae	90419.0	0	Canis	90419.0	0	Canis lupus	90419.0	0
scf7180000051803	9484	0.5147	0	412.5514	Eukaryota	32618.0	0	Chordata	32618.0	0	Carnivora	32618.0	0	Canidae	32618.0	0	Canis	32618.0	0	Canis lupus	32618.0	0
scf7180000046549	4142	0.3317	0	48.8144	no-hit	0.0	0	no-hit	0.0	0	no-hit	0.0	0	no-hit	0.0	0	no-hit	0.0	0	no-hit	0.0	0
scf7180000042368	86409	0.3809	0	55.0225	Eukaryota	23386.0	0	Chordata	23386.0	0	Carnivora	23386.0	0	Canidae	23386.0	0	Canis	23386.0	0	Canis lupus	23386.0	0
scf7180000041844	834861	0.5481	0	58.2485	Eukaryota	53301.0	0	Chordata	53301.0	0	Carnivora	53301.0	0	Canidae	53301.0	0	Canis	53301.0	0	Canis lupus	53301.0	0
scf7180000041941	880231	0.3917	0	58.4639	Eukaryota	39094.0	0	Chordata	39094.0	0	Carnivora	39094.0	0	Canidae	39094.0	0	Canis	39094.0	0	Canis lupus	39094.0	0
scf7180000049738	3514	0.4368	0	42.6168	no-hit	0.0	0	no-hit	0.0	0	no-hit	0.0	0	no-hit	0.0	0	no-hit	0.0	0	no-hit	0.0	0
scf7180000044191	46237	0.4518	0	66.0098	Eukaryota	40459.0	0	Chordata	40459.0	0	Carnivora	28307.0	1	Canidae	28307.0	1	Canis	28307.0	1	Canis lupus	28307.0	1
scf7180000049462	42198	0.4461	0	71.6651	Eukaryota	937.0	0	Platyhelminthes	492.0	1	Polystomatidea	492.0	2	Polystomatidae	492.0	2	Protopolystoma	492.0	2	Protopolystoma xenopodis	492.0	2
scf7180000046027	153052	0.4747	0	58.7757	Eukaryota	33900.0	0	Chordata	33900.0	0	Carnivora	33900.0	0	Canidae	33900.0	0	Canis	33900.0	0	Canis lupus	33900.0	0
scf7180000048277	3797	0.4459	0	61.3023	no-hit	0.0	0	no-hit	0.0	0	no-hit	0.0	0	no-hit	0.0	0	no-hit	0.0	0	no-hit	0.0	0
scf7180000054692	21481	0.4406	0	201.4476	Eukaryota	1110.0	0	Streptophyta	847.0	1	Fabales	847.0	1	Fabaceae	847.0	1	Cicer	847.0	1	Cicer arietinum	847.0	1
scf7180000043313	14934	0.3903	0	191.9051	Eukaryota	82204.0	0	Chordata	82204.0	0	Carnivora	82204.0	0	Canidae	82204.0	0	Canis	82204.0	0	Canis lupus	82204.0	0
scf7180000055077	34561	0.4423	0	154.9141	Eukaryota	847.0	0	Platyhelminthes	492.0	1	Polystomatidea	492.0	1	Polystomatidae	492.0	1	Protopolystoma	492.0	1	Protopolystoma xenopodis	492.0	1
scf7180000047445	48563	0.5514	0	53.8944	Eukaryota	8748.0	0	Chordata	8748.0	0	Carnivora	8748.0	0	Canidae	7166.0	1	Canis	5526.0	2	Canis lupus	5526.0	2
scf7180000050642	12755	0.4471	0	856.1488	Eukaryota	3288.0	0	Platyhelminthes	1726.0	2	Polystomatidea	1726.0	2	Polystomatidae	1726.0	2	Protopolystoma	1726.0	2	Protopolystoma xenopodis	1726.0	2
scf7180000053336	4382	0.4169	0	21.7343	Eukaryota	15701.0	0	Chordata	15701.0	0	Carnivora	15701.0	0	Canidae	15701.0	0	Canis	15701.0	0	Canis lupus	15701.0	0
scf7180000040556	2344992	0.4017	0	59.9424	Eukaryota	88082.0	0	Chordata	88082.0	0	Carnivora	88082.0	0	Canidae	88082.0	0	Canis	88082.0	0	Canis lupus	88082.0	0
scf7180000052184	6883	0.452	0	455.5044	Eukaryota	19172.0	0	Chordata	17219.0	1	Gadiformes	9077.0	6	Gadidae	9077.0	6	Gadus	9077.0	6	Gadus morhua	9077.0	6
scf7180000055993	10638	0.4461	0	153.2126	Eukaryota	18641.0	0	Chordata	14073.0	2	Gadiformes	6606.0	7	Gadidae	6606.0	7	Gadus	6606.0	7	Gadus morhua	6606.0	7
scf7180000054011	10000	0.3767	0	63.3761	Eukaryota	3285.0	0	Chordata	2686.0	1	Carnivora	1523.0	2	Canidae	1523.0	3	Canis	1308.0	4	Canis lupus	1308.0	4
scf7180000046416	11038	0.5262	0	30.0106	Eukaryota	47398.0	0	Chordata	47398.0	0	Carnivora	47398.0	0	Canidae	47398.0	0	Canis	47398.0	0	Canis lupus	47398.0	0
scf7180000042219	682745	0.3808	0	61.6236	Eukaryota	61485.0	0	Chordata	61485.0	0	Carnivora	61485.0	0	Canidae	61485.0	0	Canis	61485.0	0	Canis lupus	61485.0	0
scf7180000045546	163230	0.3875	0	58.9584	Eukaryota	65088.0	0	Chordata	65088.0	0	Carnivora	65088.0	0	Canidae	65088.0	0	Canis	65088.0	0	Canis lupus	65088.0	0
scf7180000056442	560018	0.4259	0	59.6447	Eukaryota	61243.0	0	Chordata	61243.0	0	Carnivora	61243.0	0	Canidae	61243.0	0	Canis	61243.0	0	Canis lupus	61243.0	0
scf7180000048882	13695	0.4429	0	82.5306	Eukaryota	3410.0	0	Chordata	3410.0	0	Carnivora	1626.0	3	Canidae	1626.0	3	Canis	1626.0	3	Canis lupus	1626.0	3
scf7180000042723	3114	0.5122	0	30.9604	no-hit	0.0	0	no-hit	0.0	0	no-hit	0.0	0	no-hit	0.0	0	no-hit	0.0	0	no-hit	0.0	0
scf7180000046226	131774	0.3643	0	60.3191	Eukaryota	51711.0	0	Chordata	51711.0	0	Carnivora	51711.0	0	Canidae	51711.0	0	Canis	51711.0	0	Canis lupus	51711.0	0
scf7180000053054	4611	0.4487	0	344.8128	Eukaryota	1027.0	0	Platyhelminthes	1027.0	0	Polystomatidea	1027.0	0	Polystomatidae	1027.0	0	Protopolystoma	1027.0	0	Protopolystoma xenopodis	1027.0	0
scf7180000043633	174560	0.3753	0	58.7786	Eukaryota	107921.0	0	Chordata	107921.0	0	Carnivora	107921.0	0	Canidae	107921.0	0	Canis	107921.0	0	Canis lupus	107921.0	0
scf7180000053816	3574	0.4524	0	248.3138	no-hit	0.0	0	no-hit	0.0	0	no-hit	0.0	0	no-hit	0.0	0	no-hit	0.0	0	no-hit	0.0	0
scf7180000049091	10311	0.4418	0	1258.3008	no-hit	0.0	0	no-hit	0.0	0	no-hit	0.0	0	no-hit	0.0	0	no-hit	0.0	0	no-hit	0.0	0
scf7180000051521	10344	0.4461	0	169.6423	Eukaryota	515.0	0	Chordata	263.0	1	Kurtiformes	263.0	1	Apogonidae	263.0	1	Sphaeramia	263.0	1	Sphaeramia orbicularis	263.0	1
scf7180000050539	2611	0.455	0	457.3997	Eukaryota	2448.0	0	Platyhelminthes	1458.0	2	Polystomatidea	1458.0	2	Polystomatidae	1458.0	2	Protopolystoma	1458.0	2	Protopolystoma xenopodis	1458.0	2
scf7180000047089	82721	0.4115	0	60.6811	Eukaryota	11414.0	0	Chordata	11414.0	0	Apterygiformes	10278.0	1	Apterygidae	10278.0	1	Apteryx	10278.0	1	Apteryx mantelli	10278.0	1
scf7180000055768	4315	0.4382	0	122.6613	no-hit	0.0	0	no-hit	0.0	0	no-hit	0.0	0	no-hit	0.0	0	no-hit	0.0	0	no-hit	0.0	0
scf7180000049316	2742	0.45	0	592.0387	no-hit	0.0	0	no-hit	0.0	0	no-hit	0.0	0	no-hit	0.0	0	no-hit	0.0	0	no-hit	0.0	0
scf7180000049335	18685	0.446	0	620.0806	Eukaryota	3454.0	0	Platyhelminthes	2026.0	2	Polystomatidea	2026.0	2	Polystomatidae	2026.0	2	Protopolystoma	2026.0	2	Protopolystoma xenopodis	2026.0	2
scf7180000046299	145772	0.4717	0	59.2145	Eukaryota	27295.0	0	Chordata	27295.0	0	Carnivora	27295.0	0	Canidae	27295.0	0	Canis	27295.0	0	Canis lupus	27295.0	0
scf7180000044167	15194	0.4195	0	80.1343	Eukaryota	2559.0	0	Chordata	2559.0	0	Carnivora	2559.0	0	Canidae	2559.0	0	Canis	2559.0	0	Canis lupus	2559.0	0
scf7180000049879	3787	0.5382	0	99.5659	Eukaryota	31527.0	0	Chordata	31527.0	0	Carnivora	31527.0	0	Canidae	31527.0	0	Canis	31527.0	0	Canis lupus	31527.0	0
scf7180000044398	332354	0.4954	0	56.3794	Eukaryota	12037.0	0	Chordata	12037.0	0	Carnivora	7507.0	1	Canidae	7507.0	1	Canis	7507.0	1	Canis lupus	7507.0	1
scf7180000046249	145408	0.4056	0	59.5883	Eukaryota	15728.0	0	Chordata	15728.0	0	Carnivora	7895.0	3	Canidae	7895.0	3	Canis	7895.0	3	Canis lupus	7895.0	3
scf7180000041731	86638	0.3672	0	55.3682	Eukaryota	102637.0	0	Chordata	102637.0	0	Carnivora	102637.0	0	Canidae	102637.0	0	Canis	102637.0	0	Canis lupus	102637.0	0
scf7180000050368	8629	0.5052	0	110.4924	Eukaryota	7741.0	0	Chordata	7741.0	0	Carnivora	7741.0	0	Canidae	7741.0	0	Canis	5766.0	1	Canis lupus	4743.0	2
scf7180000044715	25551	0.4504	0	231.1827	Eukaryota	10103.0	0	Chordata	8458.0	1	Carnivora	5530.0	2	Canidae	5530.0	2	Canis	4890.0	3	Canis lupus	4265.0	4
scf7180000046918	102315	0.4152	0	60.3106	Eukaryota	8596.0	0	Chordata	8596.0	0	Carnivora	5425.0	1	Felidae	5425.0	1	Felis	5425.0	1	Felis catus	5425.0	1
scf7180000051813	4235	0.4524	0	1732.6156	no-hit	0.0	0	no-hit	0.0	0	no-hit	0.0	0	no-hit	0.0	0	no-hit	0.0	0	no-hit	0.0	0
scf7180000052928	7807	0.5043	0	102.394	Eukaryota	8513.0	0	Chordata	8513.0	0	Carnivora	8513.0	0	Canidae	8513.0	0	Canis	6908.0	1	Canis lupus	5745.0	2
scf7180000049564	8515	0.5446	0	544.6089	Eukaryota	31245.0	0	Chordata	31245.0	0	Carnivora	31245.0	0	Canidae	31245.0	0	Canis	31245.0	0	Canis lupus	31245.0	0
scf7180000045514	3162	0.3934	0	28.6799	Eukaryota	2322.0	0	Chordata	2322.0	0	Carnivora	2322.0	0	Canidae	2322.0	0	Canis	2322.0	0	Canis lupus	2322.0	0
scf7180000042054	801805	0.4187	0	60.081	Eukaryota	42024.0	0	Chordata	42024.0	0	Carnivora	42024.0	0	Canidae	42024.0	0	Canis	42024.0	0	Canis lupus	42024.0	0
scf7180000052504	3706	0.445	0	191.6176	no-hit	0.0	0	no-hit	0.0	0	no-hit	0.0	0	no-hit	0.0	0	no-hit	0.0	0	no-hit	0.0	0
scf7180000050428	26736	0.4051	0	60.8304	Eukaryota	4004.0	0	Chordata	4004.0	0	Carnivora	1847.0	2	Canidae	1847.0	2	Canis	1847.0	2	Canis lupus	1847.0	2
scf7180000053260	21064	0.4261	0	59.5509	Eukaryota	21684.0	0	Chordata	21200.0	1	Carnivora	17092.0	3	Canidae	12792.0	5	Canis	12792.0	6	Canis lupus	12792.0	6
scf7180000056576	120212	0.3413	0	57.1254	Eukaryota	55677.0	0	Chordata	55677.0	0	Carnivora	55677.0	0	Canidae	55677.0	0	Canis	55677.0	0	Canis lupus	55677.0	0
scf7180000041147	31882	0.3731	0	145.9921	Eukaryota	20889.0	0	Chordata	20889.0	0	Carnivora	20889.0	0	Canidae	20889.0	0	Canis	20889.0	0	Canis lupus	20889.0	0
scf7180000056209	427634	0.4081	0	62.8331	Eukaryota	87276.0	0	Chordata	87276.0	0	Carnivora	87276.0	0	Canidae	87276.0	0	Canis	87276.0	0	Canis lupus	87276.0	0
scf7180000042387	489786	0.351	0	60.5279	Eukaryota	92255.0	0	Chordata	92255.0	0	Carnivora	92255.0	0	Canidae	92255.0	0	Canis	92255.0	0	Canis lupus	92255.0	0
scf7180000041580	78262	0.3676	0	55.6332	Eukaryota	11849.0	0	Chordata	11849.0	0	Artiodactyla	6469.0	2	Bovidae	6469.0	2	Ovis	6469.0	2	Ovis canadensis	6469.0	2
scf7180000048424	8040	0.431	0	128.1185	no-hit	0.0	0	no-hit	0.0	0	no-hit	0.0	0	no-hit	0.0	0	no-hit	0.0	0	no-hit	0.0	0
scf7180000048815	42505	0.4434	0	163.7864	Eukaryota	2754.0	0	Chordata	2754.0	0	Carnivora	2754.0	0	Canidae	2754.0	0	Canis	2754.0	0	Canis lupus	2754.0	0
scf7180000041966	854310	0.4666	0	59.6106	Eukaryota	67478.0	0	Chordata	67478.0	0	Carnivora	67478.0	0	Canidae	67478.0	0	Canis	67478.0	0	Canis lupus	67478.0	0
scf7180000056299	659323	0.402	0	59.4972	Eukaryota	49205.0	0	Chordata	49205.0	0	Carnivora	49205.0	0	Otariidae	32728.0	2	Zalophus	32728.0	2	Zalophus californianus	32728.0	2
scf7180000053617	3163	0.4518	0	255.3641	no-hit	0.0	0	no-hit	0.0	0	no-hit	0.0	0	no-hit	0.0	0	no-hit	0.0	0	no-hit	0.0	0
scf7180000053576	4834	0.5056	0	176.4573	Eukaryota	7288.0	0	Chordata	7288.0	0	Carnivora	7288.0	0	Canidae	7288.0	0	Canis	5813.0	1	Canis lupus	4753.0	2
scf7180000044312	80711	0.4169	0	56.4615	Eukaryota	31868.0	0	Chordata	31868.0	0	Carnivora	31868.0	0	Canidae	31868.0	0	Canis	31868.0	0	Canis lupus	31868.0	0
scf7180000049308	3612	0.4485	0	359.7809	Eukaryota	734.0	0	Chordata	734.0	0	Tetraodontiformes	734.0	0	Tetraodontidae	734.0	0	Takifugu	734.0	0	Takifugu rubripes	734.0	0
scf7180000054869	26600	0.4493	0	447.8244	Eukaryota	89197.0	0	Chordata	89197.0	0	Carnivora	89197.0	0	Canidae	89197.0	0	Canis	89197.0	0	Canis lupus	89197.0	0
scf7180000051837	12708	0.4628	0	52.5125	Eukaryota	3161.0	0	Chordata	2643.0	1	Carnivora	2643.0	1	Canidae	2643.0	1	Canis	2643.0	1	Canis lupus	2643.0	1
scf7180000053032	2878	0.4375	0	150.7691	no-hit	0.0	0	no-hit	0.0	0	no-hit	0.0	0	no-hit	0.0	0	no-hit	0.0	0	no-hit	0.0	0
scf7180000049999	4533	0.4542	0	900.0856	Eukaryota	15613.0	0	Chordata	13041.0	2	Gadiformes	7261.0	7	Gadidae	7261.0	7	Gadus	7261.0	7	Gadus morhua	7261.0	7
scf7180000055449	12593	0.4414	0	133.4565	Eukaryota	2936.0	0	Chordata	2799.0	1	Columbiformes	1748.0	4	Columbidae	1748.0	4	Streptopelia	1748.0	4	Streptopelia turtur	1748.0	4
scf7180000051522	16468	0.4429	0	279.3298	Eukaryota	40212.0	0	Chordata	26677.0	2	Gadiformes	19523.0	5	Gadidae	19523.0	5	Gadus	19523.0	5	Gadus morhua	19523.0	5
scf7180000053796	2358	0.4559	0	275.9436	no-hit	0.0	0	no-hit	0.0	0	no-hit	0.0	0	no-hit	0.0	0	no-hit	0.0	0	no-hit	0.0	0
scf7180000040967	1521082	0.3601	0	60.8013	Eukaryota	112040.0	0	Chordata	112040.0	0	Carnivora	112040.0	0	Canidae	112040.0	0	Canis	112040.0	0	Canis lupus	112040.0	0
scf7180000040955	1410742	0.5006	0	59.7396	Eukaryota	97318.0	0	Chordata	97318.0	0	Carnivora	97318.0	0	Canidae	97318.0	0	Canis	87558.0	1	Canis lupus	87558.0	1
scf7180000045174	238952	0.3896	0	59.8409	Eukaryota	52328.0	0	Chordata	52328.0	0	Carnivora	52328.0	0	Canidae	27498.0	1	Felis	24830.0	2	Felis catus	24830.0	2
scf7180000054069	3959	0.4489	0	689.5547	no-hit	0.0	0	no-hit	0.0	0	no-hit	0.0	0	no-hit	0.0	0	no-hit	0.0	0	no-hit	0.0	0
scf7180000050572	9801	0.501	0	46.1043	Eukaryota	8437.0	0	Chordata	8437.0	0	Carnivora	8437.0	0	Canidae	8437.0	0	Canis	6325.0	2	Canis lupus	5183.0	3
scf7180000048372	7705	0.44	0	192.791	Eukaryota	492.0	0	Platyhelminthes	492.0	0	Polystomatidea	492.0	0	Polystomatidae	492.0	0	Protopolystoma	492.0	0	Protopolystoma xenopodis	492.0	0
scf7180000049681	6846	0.4549	0	73.3217	Eukaryota	675.0	0	Chordata	534.0	1	Tetraodontiformes	534.0	1	Tetraodontidae	534.0	1	Takifugu	534.0	1	Takifugu rubripes	534.0	1
scf7180000052281	6500	0.4528	0	880.1574	no-hit	0.0	0	no-hit	0.0	0	no-hit	0.0	0	no-hit	0.0	0	no-hit	0.0	0	no-hit	0.0	0
scf7180000054941	27366	0.4988	0	64.3081	Eukaryota	19642.0	0	Chordata	19642.0	0	Carnivora	19642.0	0	Canidae	19642.0	0	Canis	19642.0	0	Canis lupus	19642.0	0
scf7180000051258	41622	0.476	0	53.4853	Eukaryota	4768.0	0	Chordata	4768.0	0	Carnivora	2045.0	3	Hominidae	1347.0	4	Homo	1347.0	5	Homo sapiens	1347.0	5
scf7180000052925	6289	0.4368	0	63.2236	no-hit	0.0	0	no-hit	0.0	0	no-hit	0.0	0	no-hit	0.0	0	no-hit	0.0	0	no-hit	0.0	0
scf7180000043043	124084	0.3877	0	64.7724	Eukaryota	93107.0	0	Chordata	93107.0	0	Carnivora	93107.0	0	Canidae	93107.0	0	Canis	93107.0	0	Canis lupus	93107.0	0
scf7180000043822	427886	0.3687	0	60.7312	Eukaryota	77290.0	0	Chordata	77290.0	0	Carnivora	77290.0	0	Phocidae	36128.0	2	Leptonychotes	28964.0	5	Leptonychotes weddellii	28964.0	5
scf7180000055256	13543	0.519	0	452.5906	Eukaryota	15489.0	0	Chordata	15489.0	0	Carnivora	15489.0	0	Canidae	15489.0	0	Canis	15489.0	0	Canis lupus	15489.0	0
scf7180000056318	767899	0.407	0	60.2011	Eukaryota	75116.0	0	Chordata	75116.0	0	Carnivora	75116.0	0	Canidae	75116.0	0	Canis	75116.0	0	Canis lupus	75116.0	0
scf7180000051912	3418	0.4623	0	400.186	Eukaryota	2872.0	0	Chordata	2872.0	0	Carnivora	2872.0	0	Canidae	2872.0	0	Canis	2872.0	0	Canis lupus	2872.0	0
scf7180000044701	240707	0.3827	0	58.9176	Eukaryota	93267.0	0	Chordata	93267.0	0	Carnivora	93267.0	0	Canidae	93267.0	0	Canis	93267.0	0	Canis lupus	93267.0	0
scf7180000042642	332541	0.3824	0	59.4562	Eukaryota	79043.0	0	Chordata	79043.0	0	Carnivora	79043.0	0	Canidae	36219.0	3	Canis	27209.0	6	Canis lupus	27209.0	7
scf7180000056581	36245	0.4444	0	57.8769	Eukaryota	59402.0	0	Chordata	59402.0	0	Carnivora	59402.0	0	Canidae	59402.0	0	Canis	59402.0	0	Canis lupus	59402.0	0
scf7180000043966	302621	0.5482	0	56.9121	Eukaryota	52779.0	0	Chordata	52779.0	0	Carnivora	52779.0	0	Canidae	35502.0	3	Canis	35502.0	3	Canis lupus	35502.0	3
scf7180000045637	188193	0.3443	0	57.6614	Eukaryota	72642.0	0	Chordata	72642.0	0	Carnivora	72642.0	0	Canidae	72642.0	0	Canis	72642.0	0	Canis lupus	72642.0	0
scf7180000046750	90391	0.5007	0	66.3924	Eukaryota	9791.0	0	Chordata	9791.0	0	Carnivora	9791.0	0	Canidae	8490.0	1	Canis	8490.0	1	Canis lupus	8490.0	1
scf7180000052967	3476	0.5014	0	119.2541	Eukaryota	5675.0	0	Chordata	5675.0	0	Carnivora	5675.0	0	Canidae	5675.0	0	Canis	3251.0	1	Nyctereutes procyonoides	2424.0	2
scf7180000047784	56709	0.4782	0	60.9924	Eukaryota	31045.0	0	Chordata	31045.0	0	Carnivora	28121.0	1	Canidae	25216.0	2	Canis	25216.0	2	Canis lupus	25216.0	2
scf7180000043386	471235	0.4202	0	59.5224	Eukaryota	30633.0	0	Chordata	30633.0	0	Primates	21080.0	2	Hominidae	12053.0	6	Homo	12053.0	6	Homo sapiens	12053.0	6
scf7180000040700	220890	0.4251	0	59.0359	Eukaryota	36806.0	0	Chordata	36806.0	0	Carnivora	36806.0	0	Canidae	36806.0	0	Canis	36806.0	0	Canis lupus	36806.0	0
scf7180000040975	1600418	0.4068	0	59.3221	Eukaryota	104391.0	0	Chordata	104391.0	0	Carnivora	104391.0	0	Canidae	88323.0	1	Canis	51291.0	2	Canis lupus	51291.0	2
scf7180000049965	4270	0.4525	0	1119.0593	no-hit	0.0	0	no-hit	0.0	0	no-hit	0.0	0	no-hit	0.0	0	no-hit	0.0	0	no-hit	0.0	0
scf7180000054131	25449	0.4414	0	209.4761	Eukaryota	7499.0	0	Chordata	6844.0	1	Salmoniformes	3861.0	3	Salmonidae	3861.0	3	Salmo	3678.0	4	Salmo trutta	3678.0	4
scf7180000050532	19051	0.4395	0	64.5184	Eukaryota	44540.0	0	Chordata	27400.0	2	Gadiformes	14134.0	6	Gadidae	14134.0	6	Gadus	14134.0	6	Gadus morhua	14134.0	6
scf7180000054772	11656	0.5178	0	270.186	Eukaryota	15722.0	0	Chordata	15722.0	0	Carnivora	15722.0	0	Canidae	15722.0	0	Canis	15722.0	0	Canis lupus	15722.0	0
scf7180000043205	4306	0.343	0	27.2244	Eukaryota	3235.0	0	Chordata	3235.0	0	Carnivora	2322.0	1	Canidae	2322.0	1	Canis	2322.0	1	Canis lupus	2322.0	1
scf7180000052508	4462	0.4496	0	887.2897	no-hit	0.0	0	no-hit	0.0	0	no-hit	0.0	0	no-hit	0.0	0	no-hit	0.0	0	no-hit	0.0	0
scf7180000048219	10541	0.3819	0	319.9835	Eukaryota	22834.0	0	Chordata	22834.0	0	Carnivora	22834.0	0	Canidae	22834.0	0	Canis	22834.0	0	Canis lupus	22834.0	0
scf7180000041536	716605	0.3482	0	58.4531	Eukaryota	65740.0	0	Chordata	65740.0	0	Carnivora	65740.0	0	Canidae	65740.0	0	Canis	65740.0	0	Canis lupus	65740.0	0
scf7180000051948	21901	0.3385	0	58.8137	Eukaryota	7140.0	0	Chordata	7140.0	0	Carnivora	6465.0	1	Canidae	3300.0	2	Canis	3300.0	2	Canis lupus	3300.0	2
scf7180000047978	16789	0.4405	0	161.3944	Eukaryota	7646.0	0	Chordata	6812.0	1	Kurtiformes	3041.0	3	Apogonidae	3041.0	3	Sphaeramia	3041.0	3	Sphaeramia orbicularis	3041.0	3
scf7180000042841	49933	0.364	0	54.0547	Eukaryota	4796.0	0	Chordata	4352.0	1	Perissodactyla	2750.0	3	Equidae	2750.0	4	Equus	2750.0	4	Equus caballus	2750.0	4
scf7180000042703	528564	0.4487	0	58.4817	Eukaryota	74563.0	0	Chordata	74563.0	0	Carnivora	74563.0	0	Canidae	74563.0	0	Canis	43677.0	1	Canis lupus	43677.0	1
scf7180000047692	73788	0.4068	0	60.0891	Eukaryota	35344.0	0	Chordata	35344.0	0	Carnivora	35344.0	0	Canidae	35344.0	0	Canis	35344.0	0	Canis lupus	35344.0	0
scf7180000040738	1771471	0.4321	0	60.4723	Eukaryota	91487.0	0	Chordata	91487.0	0	Carnivora	91487.0	0	Canidae	91487.0	0	Canis	81502.0	1	Canis lupus	81502.0	1
scf7180000054039	2692	0.4502	0	285.6888	Eukaryota	243.0	0	Streptophyta	243.0	0	Fabales	243.0	0	Fabaceae	243.0	0	Cicer	243.0	0	Cicer arietinum	243.0	0
scf7180000041377	243953	0.3466	0	72.4223	Eukaryota	92395.0	0	Chordata	92395.0	0	Carnivora	92395.0	0	Canidae	92395.0	0	Canis	92395.0	0	Canis lupus	92395.0	0
scf7180000041460	938627	0.4462	0	59.0668	Eukaryota	88040.0	0	Chordata	88040.0	0	Carnivora	88040.0	0	Canidae	88040.0	0	Canis	88040.0	0	Canis lupus	88040.0	0
scf7180000045296	209590	0.4081	0	58.8206	Eukaryota	35487.0	0	Chordata	35487.0	0	Carnivora	35487.0	0	Otariidae	22085.0	1	Zalophus	22085.0	2	Zalophus californianus	22085.0	2
scf7180000046129	179008	0.4371	0	59.8322	Eukaryota	14896.0	0	Chordata	14896.0	0	Carnivora	12021.0	1	Canidae	11042.0	2	Canis	9245.0	3	Canis lupus	9245.0	3
scf7180000055534	24499	0.5147	0	604.1924	Eukaryota	16158.0	0	Chordata	16158.0	0	Carnivora	16158.0	0	Canidae	16158.0	0	Canis	16158.0	0	Canis lupus	16158.0	0
scf7180000040878	1647557	0.4498	0	57.9941	Eukaryota	74368.0	0	Chordata	74368.0	0	Carnivora	74368.0	0	Canidae	72039.0	1	Canis	53979.0	2	Canis lupus	53979.0	2
scf7180000052376	11867	0.5019	0	180.5979	Eukaryota	8450.0	0	Chordata	8450.0	0	Carnivora	8450.0	0	Canidae	8450.0	0	Canis	6921.0	1	Canis lupus	5849.0	2
scf7180000048337	7251	0.4499	0	1249.4842	Eukaryota	22164.0	0	Chordata	19208.0	2	Gadiformes	11503.0	7	Gadidae	11503.0	7	Gadus	11503.0	7	Gadus morhua	11503.0	7
scf7180000053545	3289	0.4542	0	1405.2088	Eukaryota	699.0	0	Platyhelminthes	699.0	0	Polystomatidea	699.0	0	Polystomatidae	699.0	0	Protopolystoma	699.0	0	Protopolystoma xenopodis	699.0	0
scf7180000051928	19906	0.5206	0	663.4735	Eukaryota	16598.0	0	Chordata	16598.0	0	Carnivora	16598.0	0	Canidae	16598.0	0	Canis	16598.0	0	Canis lupus	16598.0	0
scf7180000051989	8313	0.4975	0	70.3838	Eukaryota	8726.0	0	Chordata	8726.0	0	Carnivora	8726.0	0	Canidae	8726.0	0	Canis	7111.0	1	Canis lupus	5973.0	2
scf7180000048622	59762	0.3905	0	60.8135	Eukaryota	6990.0	0	Chordata	6990.0	0	Carnivora	4314.0	2	Canidae	4314.0	2	Canis	4314.0	2	Canis lupus	4314.0	2
scf7180000052947	2438	0.4541	0	1329.0544	no-hit	0.0	0	no-hit	0.0	0	no-hit	0.0	0	no-hit	0.0	0	no-hit	0.0	0	no-hit	0.0	0
scf7180000049172	3447	0.4444	0	45.8231	Eukaryota	5339.0	0	Chordata	5078.0	1	Kurtiformes	4797.0	2	Apogonidae	4797.0	2	Sphaeramia	4797.0	2	Sphaeramia orbicularis	4797.0	2
scf7180000050789	22919	0.4806	0	385.8536	Eukaryota	85707.0	0	Chordata	85707.0	0	Carnivora	85707.0	0	Canidae	85707.0	0	Canis	85707.0	0	Canis lupus	85707.0	0
scf7180000048415	17918	0.4396	0	325.2362	Eukaryota	1059.0	0	Chordata	796.0	1	Columbiformes	566.0	2	Columbidae	566.0	2	Streptopelia	566.0	2	Streptopelia turtur	566.0	2
scf7180000046095	16133	0.49	0	69.9297	Eukaryota	24561.0	0	Chordata	24561.0	0	Carnivora	24561.0	0	Canidae	24561.0	0	Canis	24561.0	0	Canis lupus	24561.0	0
scf7180000047493	65688	0.4889	0	59.0569	Eukaryota	19425.0	0	Chordata	19425.0	0	Carnivora	19425.0	0	Canidae	12804.0	2	Canis	8552.0	3	Canis lupus	8552.0	3
scf7180000055434	23742	0.4482	0	345.9545	Eukaryota	9349.0	0	Chordata	9349.0	0	Carnivora	9349.0	0	Canidae	9349.0	0	Canis	5551.0	1	Canis lupus	5551.0	1
scf7180000048311	10430	0.4357	0	102.0164	Eukaryota	4647.0	0	Chordata	4647.0	0	Tetraodontiformes	1581.0	5	Tetraodontidae	1581.0	5	Takifugu	1581.0	6	Takifugu rubripes	1581.0	6
scf7180000044331	35382	0.6099	0	66.9777	Eukaryota	32430.0	0	Chordata	32430.0	0	Carnivora	32430.0	0	Canidae	32430.0	0	Canis	32430.0	0	Canis lupus	32430.0	0
scf7180000046856	75271	0.4002	0	60.5128	Eukaryota	13371.0	0	Chordata	13371.0	0	Carnivora	13371.0	0	Canidae	13371.0	0	Canis	9402.0	3	Canis aureus	3942.0	6
scf7180000043643	64862	0.3823	0	58.1461	Eukaryota	61963.0	0	Chordata	61963.0	0	Carnivora	61963.0	0	Canidae	61963.0	0	Canis	61963.0	0	Canis lupus	61963.0	0
scf7180000051095	4744	0.4313	0	55.428	no-hit	0.0	0	no-hit	0.0	0	no-hit	0.0	0	no-hit	0.0	0	no-hit	0.0	0	no-hit	0.0	0
scf7180000054473	17916	0.4606	0	63.6529	Eukaryota	47206.0	0	Chordata	47206.0	0	Carnivora	47206.0	0	Canidae	47206.0	0	Canis	47206.0	0	Canis lupus	47206.0	0
scf7180000047601	82027	0.4099	0	55.4066	Eukaryota	13724.0	0	Chordata	13724.0	0	Carnivora	12538.0	1	Canidae	5219.0	4	Canis	5219.0	5	Canis lupus	5219.0	5
scf7180000050853	2046	0.4545	0	170.3627	no-hit	0.0	0	no-hit	0.0	0	no-hit	0.0	0	no-hit	0.0	0	no-hit	0.0	0	no-hit	0.0	0
scf7180000050033	8766	0.439	0	163.371	no-hit	0.0	0	no-hit	0.0	0	no-hit	0.0	0	no-hit	0.0	0	no-hit	0.0	0	no-hit	0.0	0
scf7180000045706	90544	0.3777	0	57.1828	Eukaryota	88698.0	0	Chordata	88698.0	0	Carnivora	88698.0	0	Canidae	88698.0	0	Canis	88698.0	0	Canis lupus	88698.0	0
scf7180000052274	3275	0.4388	0	112.3903	no-hit	0.0	0	no-hit	0.0	0	no-hit	0.0	0	no-hit	0.0	0	no-hit	0.0	0	no-hit	0.0	0
scf7180000044125	209167	0.372	0	60.5376	Eukaryota	18716.0	0	Chordata	18716.0	0	Primates	18716.0	0	Hominidae	16913.0	1	Homo	9220.0	2	Homo sapiens	9220.0	2
scf7180000042794	537714	0.4702	0	60.0223	Eukaryota	29013.0	0	Chordata	29013.0	0	Carnivora	29013.0	0	Canidae	29013.0	0	Canis	26023.0	1	Canis lupus	26023.0	1
scf7180000044000	359496	0.479	0	57.9022	Eukaryota	59075.0	0	Chordata	59075.0	0	Carnivora	59075.0	0	Canidae	47547.0	1	Canis	34761.0	3	Canis lupus	34761.0	3
scf7180000044709	337235	0.357	0	59.9207	Eukaryota	57721.0	0	Chordata	57721.0	0	Carnivora	57721.0	0	Canidae	57721.0	0	Canis	57721.0	0	Canis lupus	57721.0	0
scf7180000040509	2312918	0.3923	0	60.6448	Eukaryota	94150.0	0	Chordata	94150.0	0	Carnivora	94150.0	0	Canidae	94150.0	0	Canis	94150.0	0	Canis lupus	94150.0	0
scf7180000043969	345473	0.5484	0	58.2373	Eukaryota	28055.0	0	Chordata	28055.0	0	Carnivora	28055.0	0	Canidae	28055.0	0	Canis	18152.0	1	Canis lupus	18152.0	1
scf7180000041445	666017	0.5168	0	58.6525	Eukaryota	83150.0	0	Chordata	83150.0	0	Carnivora	83150.0	0	Canidae	83150.0	0	Canis	78891.0	1	Canis lupus	78891.0	1
scf7180000046827	8784	0.4323	0	47.8281	no-hit	0.0	0	no-hit	0.0	0	no-hit	0.0	0	no-hit	0.0	0	no-hit	0.0	0	no-hit	0.0	0
scf7180000054071	4145	0.4548	0	1133.3451	no-hit	0.0	0	no-hit	0.0	0	no-hit	0.0	0	no-hit	0.0	0	no-hit	0.0	0	no-hit	0.0	0
scf7180000045367	187890	0.3872	0	59.3437	Eukaryota	127187.0	0	Chordata	127187.0	0	Carnivora	127187.0	0	Canidae	127187.0	0	Canis	121272.0	1	Canis lupus	121272.0	1
scf7180000046187	170905	0.4689	0	58.0692	Eukaryota	15373.0	1	Chordata	15373.0	1	Primates	10920.0	2	Hominidae	4615.0	5	Ursus	4453.0	6	Ursus arctos	4453.0	6
scf7180000051173	4119	0.4462	0	213.1842	no-hit	0.0	0	no-hit	0.0	0	no-hit	0.0	0	no-hit	0.0	0	no-hit	0.0	0	no-hit	0.0	0
scf7180000052499	8269	0.4575	0	62.6707	Eukaryota	6502.0	0	Echinodermata	2307.0	2	Forcipulatida	2307.0	3	Asteriidae	2307.0	3	Asterias	2307.0	4	Asterias rubens	2307.0	4
scf7180000046615	9116	0.4115	0	35.4389	Eukaryota	34003.0	0	Chordata	34003.0	0	Carnivora	34003.0	0	Canidae	34003.0	0	Canis	34003.0	0	Canis lupus	34003.0	0
scf7180000050788	2998	0.449	0	395.5348	Eukaryota	1998.0	0	Platyhelminthes	777.0	2	Polystomatidea	777.0	2	Polystomatidae	777.0	2	Protopolystoma	777.0	2	Protopolystoma xenopodis	777.0	2
scf7180000049149	10745	0.4457	0	193.0505	Eukaryota	7711.0	0	Chordata	7711.0	0	Tetraodontiformes	5913.0	1	Tetraodontidae	5913.0	1	Takifugu	5913.0	1	Takifugu rubripes	5913.0	1
scf7180000050463	29210	0.4405	0	65.9765	Eukaryota	789.0	0	Chordata	789.0	0	Columbiformes	414.0	1	Columbidae	414.0	1	Streptopelia	414.0	1	Streptopelia turtur	414.0	1
scf7180000051223	25016	0.5026	0	200.0629	Eukaryota	9202.0	0	Chordata	9202.0	0	Carnivora	9202.0	0	Canidae	9202.0	0	Canis	8056.0	1	Canis lupus	6860.0	2
scf7180000051835	15305	0.4427	0	79.9101	Eukaryota	17021.0	0	Platyhelminthes	9231.0	1	Cyclophyllidea	4662.0	7	Hymenolepididae	4662.0	7	Hymenolepis	4662.0	7	Hymenolepis microstoma	4662.0	7
scf7180000047388	54278	0.4356	0	101.6772	Eukaryota	7005.0	0	Chordata	6458.0	1	Kurtiformes	3028.0	4	Apogonidae	3028.0	4	Sphaeramia	3028.0	4	Sphaeramia orbicularis	3028.0	4
scf7180000052097	10124	0.4455	0	112.0397	Eukaryota	666.0	0	Platyhelminthes	409.0	1	Polystomatidea	409.0	1	Polystomatidae	409.0	1	Protopolystoma	409.0	1	Protopolystoma xenopodis	409.0	1
scf7180000047859	98222	0.3503	0	59.0896	Eukaryota	12060.0	1	Chordata	12060.0	1	Carnivora	5274.0	3	Canidae	5274.0	3	Canis	5274.0	4	Canis lupus	5274.0	4
scf7180000051568	2912	0.4571	0	249.1373	Eukaryota	1225.0	0	Chordata	1225.0	0	Tetraodontiformes	988.0	1	Tetraodontidae	988.0	1	Takifugu	988.0	1	Takifugu rubripes	988.0	1
scf7180000056192	1681947	0.3863	0	59.8767	Eukaryota	93723.0	0	Chordata	93723.0	0	Carnivora	93723.0	0	Canidae	93723.0	0	Canis	93723.0	0	Canis lupus	93723.0	0
scf7180000041972	281767	0.3708	0	57.8079	Eukaryota	85123.0	0	Chordata	85123.0	0	Carnivora	85123.0	0	Canidae	85123.0	0	Canis	85123.0	0	Canis lupus	85123.0	0
scf7180000048350	33099	0.4453	0	129.8378	Eukaryota	10080.0	0	Chordata	6539.0	1	Polystomatidea	3541.0	3	Polystomatidae	3541.0	3	Protopolystoma	3541.0	3	Protopolystoma xenopodis	3541.0	3
scf7180000044104	3548	0.3771	0	26.1098	Eukaryota	5198.0	0	Chordata	5198.0	0	Primates	4034.0	1	Hominidae	4034.0	1	Pan	2326.0	2	Pan troglodytes	2326.0	2
scf7180000045671	156195	0.5789	0	55.3656	Eukaryota	39117.0	0	Chordata	39117.0	0	Carnivora	39117.0	0	Canidae	37628.0	1	Canis	25674.0	2	Canis lupus	25674.0	2
scf7180000045193	170563	0.3873	0	60.7823	Eukaryota	23800.0	0	Chordata	23800.0	0	Carnivora	23800.0	0	Canidae	23800.0	0	Canis	21083.0	1	Canis lupus	21083.0	1
scf7180000041959	792607	0.5345	0	58.6894	Eukaryota	61745.0	0	Chordata	61745.0	0	Carnivora	61745.0	0	Canidae	29921.0	2	Leptonychotes	21552.0	4	Leptonychotes weddellii	21552.0	4
scf7180000049539	24039	0.4398	0	559.2159	Eukaryota	2752.0	0	Chordata	2752.0	0	Carnivora	2752.0	0	Canidae	2752.0	0	Canis	2752.0	0	Canis lupus	2752.0	0
scf7180000053412	4697	0.4486	0	368.0004	Eukaryota	2264.0	0	Platyhelminthes	869.0	2	Polystomatidea	869.0	2	Polystomatidae	869.0	2	Protopolystoma	869.0	2	Protopolystoma xenopodis	869.0	2
scf7180000053708	3744	0.4479	0	133.2714	no-hit	0.0	0	no-hit	0.0	0	no-hit	0.0	0	no-hit	0.0	0	no-hit	0.0	0	no-hit	0.0	0
scf7180000048700	44857	0.668	0	55.7046	Eukaryota	38452.0	0	Chordata	38452.0	0	Carnivora	38452.0	0	Canidae	34948.0	2	Canis	33623.0	4	Canis lupus	33623.0	4
scf7180000053105	7733	0.4469	0	530.9013	Eukaryota	2831.0	0	Chordata	2831.0	0	Tetraodontiformes	2564.0	1	Tetraodontidae	2564.0	1	Takifugu	2564.0	1	Takifugu rubripes	2564.0	1
scf7180000047247	15706	0.5194	0	962.6459	Eukaryota	32403.0	0	Chordata	32403.0	0	Carnivora	32403.0	0	Canidae	32403.0	0	Canis	32403.0	0	Canis lupus	32403.0	0
scf7180000055722	9075	0.4334	0	108.1733	no-hit	0.0	0	no-hit	0.0	0	no-hit	0.0	0	no-hit	0.0	0	no-hit	0.0	0	no-hit	0.0	0
scf7180000046695	98153	0.3654	0	56.6471	Eukaryota	76240.0	0	Chordata	76240.0	0	Carnivora	76240.0	0	Canidae	76240.0	0	Canis	76240.0	0	Canis lupus	76240.0	0
scf7180000051713	7967	0.445	0	2558.8212	Eukaryota	398.0	0	Platyhelminthes	398.0	0	Polystomatidea	398.0	0	Polystomatidae	398.0	0	Protopolystoma	398.0	0	Protopolystoma xenopodis	398.0	0
scf7180000053216	6005	0.5204	0	84.3921	Eukaryota	3228.0	0	Chordata	3228.0	0	Carnivora	3228.0	0	Canidae	3228.0	0	Canis	2406.0	1	Canis lupus	2406.0	1
scf7180000041769	213730	0.3462	0	57.3446	Eukaryota	125511.0	0	Chordata	125511.0	0	Carnivora	125511.0	0	Canidae	125511.0	0	Canis	111476.0	1	Canis lupus	111476.0	1
scf7180000045814	8485	0.4354	0	227.8479	Eukaryota	577.0	0	Platyhelminthes	577.0	0	Polystomatidea	577.0	0	Polystomatidae	577.0	0	Protopolystoma	577.0	0	Protopolystoma xenopodis	577.0	0
scf7180000041230	216595	0.4049	0	59.8828	Eukaryota	64443.0	0	Chordata	64443.0	0	Carnivora	64443.0	0	Canidae	64443.0	0	Canis	64443.0	0	Canis lupus	64443.0	0
scf7180000041978	547796	0.3865	0	60.1256	Eukaryota	71347.0	0	Chordata	71347.0	0	Carnivora	71347.0	0	Canidae	71347.0	0	Canis	71347.0	0	Canis lupus	71347.0	0
scf7180000040968	8407	0.4708	0	66.3158	Eukaryota	25149.0	0	Chordata	25149.0	0	Carnivora	25149.0	0	Canidae	25149.0	0	Canis	25149.0	0	Canis lupus	25149.0	0
scf7180000044363	324601	0.4139	0	59.0659	Eukaryota	44640.0	0	Chordata	44640.0	0	Carnivora	44640.0	0	Canidae	23635.0	2	Canis	14223.0	4	Canis lupus	14223.0	4
scf7180000055626	17933	0.4434	0	112.7471	Eukaryota	4792.0	0	Platyhelminthes	3957.0	1	Cyclophyllidea	3666.0	3	Hymenolepididae	3666.0	3	Hymenolepis	3666.0	3	Hymenolepis microstoma	3666.0	3
scf7180000046867	109218	0.3714	0	59.9963	Eukaryota	7208.0	0	Chordata	7208.0	0	Carnivora	6037.0	1	Felidae	4592.0	2	Felis	3967.0	3	Felis catus	3967.0	3
scf7180000045392	229112	0.4822	0	57.7816	Eukaryota	51543.0	0	Chordata	51543.0	0	Carnivora	51543.0	0	Canidae	31799.0	2	Canis	25656.0	4	Canis lupus	25656.0	4
scf7180000047459	70892	0.4138	0	56.8451	Eukaryota	20954.0	0	Chordata	20954.0	0	Carnivora	20954.0	0	Canidae	19788.0	1	Canis	18979.0	2	Canis lupus	18979.0	2
scf7180000046117	134508	0.4335	0	59.4906	Eukaryota	11866.0	0	Chordata	11866.0	0	Carnivora	11866.0	0	Canidae	11866.0	0	Canis	11866.0	0	Canis lupus	11866.0	0
scf7180000051447	10300	0.4549	0	1049.4491	Eukaryota	17501.0	0	Chordata	14648.0	3	Gadiformes	10394.0	7	Gadidae	10394.0	7	Gadus	10394.0	7	Gadus morhua	10394.0	7
scf7180000044782	10251	0.4272	0	36.4397	Eukaryota	33013.0	0	Chordata	33013.0	0	Carnivora	33013.0	0	Canidae	33013.0	0	Canis	23128.0	1	Canis lupus	23128.0	1
scf7180000052068	5074	0.4511	0	246.9609	no-hit	0.0	0	no-hit	0.0	0	no-hit	0.0	0	no-hit	0.0	0	no-hit	0.0	0	no-hit	0.0	0
scf7180000041635	954394	0.4958	0	58.9842	Eukaryota	51088.0	0	Chordata	51088.0	0	Carnivora	51088.0	0	Canidae	51088.0	0	Canis	51088.0	0	Canis lupus	51088.0	0
scf7180000048015	51179	0.4497	0	80.6625	Eukaryota	27015.0	0	Chordata	27015.0	0	Carnivora	27015.0	0	Canidae	27015.0	0	Canis	27015.0	0	Canis lupus	27015.0	0
scf7180000050083	5154	0.4562	0	1098.3027	Eukaryota	3219.0	0	Platyhelminthes	1941.0	2	Polystomatidea	1941.0	2	Polystomatidae	1941.0	2	Protopolystoma	1941.0	2	Protopolystoma xenopodis	1941.0	2
scf7180000046880	3990	0.3862	0	32.7718	Eukaryota	3196.0	0	Chordata	3196.0	0	Carnivora	3196.0	0	Canidae	3196.0	0	Canis	3196.0	0	Canis lupus	3196.0	0
scf7180000040479	1115550	0.3809	0	61.0257	Eukaryota	92159.0	0	Chordata	92159.0	0	Carnivora	92159.0	0	Canidae	92159.0	0	Canis	83036.0	1	Canis lupus	83036.0	1
scf7180000047488	82937	0.4386	0	115.8677	Eukaryota	85071.0	0	Chordata	85071.0	0	Carnivora	85071.0	0	Canidae	85071.0	0	Canis	85071.0	0	Canis lupus	85071.0	0
scf7180000054202	23218	0.4403	0	165.6259	Eukaryota	29098.0	1	Chordata	29098.0	1	Tetraodontiformes	10078.0	5	Tetraodontidae	10078.0	5	Takifugu	10078.0	5	Takifugu rubripes	10078.0	5
scf7180000047653	18749	0.4192	0	56.4738	Eukaryota	34750.0	0	Chordata	34750.0	0	Carnivora	34750.0	0	Canidae	34750.0	0	Canis	34750.0	0	Canis lupus	34750.0	0
scf7180000043895	56320	0.3584	0	51.1449	Eukaryota	56034.0	0	Chordata	56034.0	0	Carnivora	56034.0	0	Canidae	56034.0	0	Canis	56034.0	0	Canis lupus	56034.0	0
scf7180000056211	142936	0.4178	0	160.3997	Eukaryota	46377.0	0	Chordata	46377.0	0	Carnivora	41691.0	1	Canidae	41691.0	1	Canis	41691.0	1	Canis lupus	41691.0	1
scf7180000051823	5700	0.4514	0	1084.0362	Eukaryota	2939.0	0	Platyhelminthes	1655.0	2	Polystomatidea	1655.0	2	Polystomatidae	1655.0	2	Protopolystoma	1655.0	2	Protopolystoma xenopodis	1655.0	2
scf7180000053488	5355	0.504	0	208.3202	Eukaryota	7913.0	0	Chordata	7913.0	0	Carnivora	7913.0	0	Canidae	7913.0	0	Canis	5922.0	1	Canis lupus	4835.0	2
scf7180000053764	6490	0.516	0	98.534	Eukaryota	12228.0	0	Chordata	12228.0	0	Carnivora	12228.0	0	Canidae	12228.0	0	Canis	12228.0	0	Canis lupus	12228.0	0
scf7180000045120	89987	0.4197	0	54.5843	Eukaryota	55413.0	0	Chordata	55413.0	0	Carnivora	55413.0	0	Canidae	55413.0	0	Canis	55413.0	0	Canis lupus	55413.0	0
scf7180000046135	195584	0.4027	0	58.77	Eukaryota	47526.0	0	Chordata	47526.0	0	Carnivora	47526.0	0	Canidae	47526.0	0	Canis	43551.0	1	Canis lupus	43551.0	1
scf7180000052939	2861	0.4474	0	753.5044	no-hit	0.0	0	no-hit	0.0	0	no-hit	0.0	0	no-hit	0.0	0	no-hit	0.0	0	no-hit	0.0	0
scf7180000050837	12777	0.4564	0	104.4782	Eukaryota	58971.0	0	Chordata	58971.0	0	Carnivora	58971.0	0	Canidae	58971.0	0	Canis	58971.0	0	Canis lupus	58971.0	0
scf7180000041352	1071387	0.4679	0	59.4827	Eukaryota	67466.0	0	Chordata	67466.0	0	Carnivora	67466.0	0	Canidae	67466.0	0	Canis	62202.0	1	Canis lupus	62202.0	1
scf7180000050290	8240	0.4521	0	684.2565	Eukaryota	3459.0	0	Chordata	2649.0	1	Gonorynchiformes	994.0	3	Chanidae	994.0	3	Chanos	994.0	3	Chanos chanos	994.0	3
scf7180000041019	1472992	0.3817	0	59.8921	Eukaryota	33887.0	0	Chordata	33887.0	0	Carnivora	33887.0	0	Canidae	33887.0	0	Canis	30518.0	1	Canis lupus	30518.0	1
scf7180000046225	17433	0.4451	0	107.5696	Eukaryota	88494.0	0	Chordata	88494.0	0	Carnivora	88494.0	0	Canidae	88494.0	0	Canis	88494.0	0	Canis lupus	88494.0	0
scf7180000042073	806391	0.3452	0	59.1243	Eukaryota	74932.0	0	Chordata	74932.0	0	Carnivora	74932.0	0	Canidae	74932.0	0	Canis	74932.0	0	Canis lupus	74932.0	0
scf7180000056528	267853	0.4515	0	58.0187	Eukaryota	35360.0	0	Chordata	35360.0	0	Carnivora	35360.0	0	Canidae	35360.0	0	Canis	35360.0	0	Canis lupus	35360.0	0
scf7180000049722	10327	0.4541	0	2225.1575	Eukaryota	4296.0	0	Platyhelminthes	2488.0	3	Polystomatidea	2488.0	3	Polystomatidae	2488.0	3	Protopolystoma	2488.0	3	Protopolystoma xenopodis	2488.0	3
scf7180000056005	17993	0.5499	0	438.8765	Eukaryota	5842.0	0	Chordata	5842.0	0	Carnivora	5842.0	0	Canidae	5842.0	0	Canis	5186.0	1	Canis lupus	5186.0	1
scf7180000054952	22110	0.441	0	219.3375	Eukaryota	3280.0	0	Platyhelminthes	2036.0	1	Polystomatidea	2036.0	2	Polystomatidae	2036.0	2	Protopolystoma	2036.0	2	Protopolystoma xenopodis	2036.0	2
scf7180000049662	15794	0.4238	0	54.543	Eukaryota	49469.0	0	Chordata	49469.0	0	Carnivora	49469.0	0	Canidae	31518.0	2	Vulpes	27874.0	3	Vulpes vulpes	27874.0	3
scf7180000055765	26742	0.4418	0	107.4949	Eukaryota	287.0	0	Chordata	287.0	0	Kurtiformes	287.0	0	Apogonidae	287.0	0	Sphaeramia	287.0	0	Sphaeramia orbicularis	287.0	0
scf7180000045204	249969	0.4521	0	60.2313	Eukaryota	43384.0	0	Chordata	43384.0	0	Carnivora	43384.0	0	Canidae	43384.0	0	Canis	39195.0	1	Canis lupus	39195.0	1
scf7180000047184	17297	0.4011	0	38.9116	Eukaryota	3903.0	0	Chordata	3903.0	0	Carnivora	3903.0	0	Canidae	3090.0	1	Canis	3090.0	1	Canis lupus	3090.0	1
scf7180000042995	310275	0.3986	0	59.7392	Eukaryota	90231.0	0	Chordata	90231.0	0	Carnivora	90231.0	0	Canidae	90231.0	0	Canis	90231.0	0	Canis lupus	90231.0	0
scf7180000044045	46681	0.4085	0	59.1554	Eukaryota	3708.0	0	Chordata	3708.0	0	Artiodactyla	1860.0	2	Canidae	1393.0	3	Canis	1393.0	3	Canis lupus	1393.0	3
scf7180000055485	53274	0.4488	0	64.2119	Eukaryota	81258.0	0	Chordata	81258.0	0	Carnivora	81258.0	0	Canidae	81258.0	0	Canis	81258.0	0	Canis lupus	81258.0	0
scf7180000043736	22797	0.4562	0	49.973	Eukaryota	48635.0	0	Chordata	48635.0	0	Carnivora	48635.0	0	Canidae	48635.0	0	Canis	48635.0	0	Canis lupus	48635.0	0
scf7180000054776	29629	0.4376	0	204.9275	Eukaryota	7106.0	0	Chordata	7106.0	0	Carnivora	7106.0	0	Canidae	7106.0	0	Canis	7106.0	0	Canis lupus	7106.0	0
scf7180000044547	244678	0.3662	0	58.7707	Eukaryota	84138.0	0	Chordata	84138.0	0	Carnivora	84138.0	0	Canidae	84138.0	0	Canis	84138.0	0	Canis lupus	84138.0	0
scf7180000045680	162082	0.4847	0	58.4608	Eukaryota	38533.0	0	Chordata	38533.0	0	Carnivora	38533.0	0	Canidae	38533.0	0	Canis	38533.0	0	Canis lupus	38533.0	0
scf7180000051680	6919	0.4386	0	129.432	Eukaryota	3100.0	0	Chordata	3100.0	0	Carnivora	3100.0	0	Canidae	3100.0	0	Canis	3100.0	0	Canis lupus	3100.0	0
scf7180000048877	61027	0.485	0	59.6083	Eukaryota	96754.0	0	Chordata	96754.0	0	Carnivora	96754.0	0	Canidae	87302.0	1	Canis	67099.0	2	Canis lupus	67099.0	2
scf7180000049504	15632	0.4539	0	2539.3561	Eukaryota	1562.0	0	Echinodermata	577.0	3	Forcipulatida	577.0	3	Asteriidae	577.0	3	Asterias	577.0	3	Asterias rubens	577.0	3
scf7180000047235	22056	0.3751	0	57.2147	Eukaryota	52248.0	0	Chordata	52248.0	0	Carnivora	52248.0	0	Canidae	52248.0	0	Canis	52248.0	0	Canis lupus	52248.0	0
scf7180000042283	901230	0.5022	0	56.4182	Eukaryota	71019.0	0	Chordata	71019.0	0	Carnivora	71019.0	0	Canidae	71019.0	0	Canis	60405.0	1	Canis lupus	60405.0	1
scf7180000047749	78449	0.3647	0	59.6021	Eukaryota	17380.0	0	Chordata	17380.0	0	Carnivora	17380.0	0	Canidae	17380.0	0	Canis	17380.0	0	Canis lupus	17380.0	0
scf7180000049303	8509	0.4529	0	2700.8359	Eukaryota	3330.0	0	Platyhelminthes	1642.0	3	Polystomatidea	1642.0	3	Polystomatidae	1642.0	3	Protopolystoma	1642.0	3	Protopolystoma xenopodis	1642.0	3
scf7180000043414	140222	0.4049	0	59.2386	Eukaryota	60788.0	0	Chordata	60788.0	0	Carnivora	60788.0	0	Canidae	60788.0	0	Canis	60788.0	0	Canis lupus	60788.0	0
scf7180000047785	26280	0.4409	0	259.7873	Eukaryota	3401.0	0	Chordata	2695.0	1	Carnivora	2695.0	1	Canidae	2695.0	1	Canis	2695.0	1	Canis lupus	2695.0	1
scf7180000047043	88467	0.3875	0	60.5343	Eukaryota	9338.0	0	Chordata	9338.0	0	Primates	5656.0	2	Hominidae	5656.0	3	Homo	5656.0	4	Homo sapiens	5656.0	4
scf7180000055999	3798	0.4344	0	374.9455	no-hit	0.0	0	no-hit	0.0	0	no-hit	0.0	0	no-hit	0.0	0	no-hit	0.0	0	no-hit	0.0	0
scf7180000051606	10631	0.4581	0	60.4589	Eukaryota	12528.0	0	Chordata	12528.0	0	Carnivora	12528.0	0	Canidae	12528.0	0	Canis	12528.0	0	Canis lupus	12528.0	0
scf7180000049905	15659	0.4454	0	117.2884	Eukaryota	7633.0	0	Chordata	6287.0	1	Salmoniformes	3150.0	2	Salmonidae	3150.0	2	Sphaeramia	3137.0	3	Sphaeramia orbicularis	3137.0	3
scf7180000046530	116600	0.6208	0	54.9426	Eukaryota	36632.0	0	Chordata	36632.0	0	Carnivora	36632.0	0	Canidae	36632.0	0	Canis	28074.0	1	Canis lupus	28074.0	1
scf7180000052690	3466	0.4553	0	216.7858	Eukaryota	502.0	0	Streptophyta	502.0	0	Fabales	502.0	0	Fabaceae	502.0	0	Cicer	502.0	0	Cicer arietinum	502.0	0
scf7180000041591	154146	0.3654	0	56.6004	Eukaryota	55651.0	0	Chordata	55651.0	0	Carnivora	55651.0	0	Canidae	55651.0	0	Canis	30408.0	1	Canis lupus	30408.0	1
scf7180000048213	32649	0.4425	0	79.8531	Eukaryota	6623.0	0	Chordata	5431.0	1	Kurtiformes	1651.0	4	Apogonidae	1651.0	4	Sphaeramia	1651.0	4	Sphaeramia orbicularis	1651.0	4
scf7180000056381	73215	0.3687	0	56.0225	Eukaryota	8852.0	0	Chordata	8852.0	0	Carnivora	6895.0	1	Canidae	6895.0	1	Canis	6895.0	2	Canis lupus	6895.0	2
scf7180000046394	18447	0.4357	0	594.1129	no-hit	0.0	0	no-hit	0.0	0	no-hit	0.0	0	no-hit	0.0	0	no-hit	0.0	0	no-hit	0.0	0
scf7180000044708	267894	0.4077	0	58.426	Eukaryota	63303.0	0	Chordata	63303.0	0	Carnivora	63303.0	0	Canidae	63303.0	0	Canis	63303.0	0	Canis lupus	63303.0	0
scf7180000044039	528148	0.4403	0	58.4435	Eukaryota	21602.0	0	Chordata	21602.0	0	Carnivora	21602.0	0	Canidae	21602.0	0	Canis	19066.0	1	Canis lupus	19066.0	1
scf7180000041989	181634	0.5423	0	56.854	Eukaryota	48529.0	0	Chordata	48529.0	0	Carnivora	48529.0	0	Canidae	48529.0	0	Canis	40214.0	1	Canis lupus	40214.0	1
scf7180000042096	9432	0.4078	0	44.1835	Eukaryota	3365.0	0	Chordata	3365.0	0	Carnivora	2659.0	1	Canidae	2659.0	1	Canis	2659.0	1	Canis lupus	2659.0	1
scf7180000046036	16725	0.4519	0	50.69	Eukaryota	13971.0	0	Chordata	13971.0	0	Carnivora	13971.0	0	Canidae	13971.0	0	Canis	13971.0	0	Canis lupus	13971.0	0
scf7180000043881	218754	0.4455	0	58.8486	Eukaryota	68153.0	0	Chordata	68153.0	0	Carnivora	68153.0	0	Canidae	56071.0	2	Canis	49675.0	3	Canis lupus	49675.0	4
scf7180000053416	5089	0.4496	0	1124.424	Eukaryota	3782.0	0	Platyhelminthes	2353.0	2	Polystomatidea	2353.0	2	Polystomatidae	2353.0	2	Protopolystoma	2353.0	2	Protopolystoma xenopodis	2353.0	2
scf7180000042602	625047	0.3746	0	59.6096	Eukaryota	45519.0	0	Chordata	45519.0	0	Carnivora	45519.0	0	Canidae	45519.0	0	Canis	45519.0	0	Canis lupus	45519.0	0
scf7180000051197	3738	0.4588	0	360.0796	Eukaryota	878.0	0	Chordata	449.0	2	Columbiformes	449.0	2	Columbidae	449.0	2	Streptopelia	449.0	2	Streptopelia turtur	449.0	2
scf7180000050134	2660	0.4526	0	249.0658	Eukaryota	1722.0	0	Platyhelminthes	674.0	3	Polystomatidea	674.0	3	Polystomatidae	674.0	3	Protopolystoma	674.0	3	Protopolystoma xenopodis	674.0	3
scf7180000046622	79233	0.3239	0	53.2814	Eukaryota	4814.0	1	Chordata	4814.0	1	Artiodactyla	2123.0	4	Bovidae	2123.0	4	undef	1984.0	5	eukaryotic synthetic construct	1984.0	5
scf7180000043377	42503	0.4123	0	61.8418	Eukaryota	42258.0	0	Chordata	42258.0	0	Carnivora	42258.0	0	Canidae	42258.0	0	Canis	42258.0	0	Canis lupus	42258.0	0
scf7180000053803	4261	0.5095	0	162.7813	Eukaryota	8093.0	0	Chordata	8093.0	0	Carnivora	8093.0	0	Canidae	8093.0	0	Canis	6418.0	1	Canis lupus	5174.0	2
scf7180000045216	246061	0.4134	0	59.7782	Eukaryota	135146.0	0	Chordata	135146.0	0	Carnivora	135146.0	0	Canidae	135146.0	0	Canis	80874.0	1	Canis lupus	80874.0	1
scf7180000051971	3143	0.4327	0	65.9859	Eukaryota	2147.0	0	Platyhelminthes	1644.0	1	Polystomatidea	1644.0	1	Polystomatidae	1644.0	1	Protopolystoma	1644.0	1	Protopolystoma xenopodis	1644.0	1
scf7180000049888	8504	0.4392	0	248.2842	no-hit	0.0	0	no-hit	0.0	0	no-hit	0.0	0	no-hit	0.0	0	no-hit	0.0	0	no-hit	0.0	0
scf7180000052399	6697	0.659	0	39.769	Eukaryota	13731.0	0	Chordata	13731.0	0	Carnivora	13731.0	0	Canidae	10238.0	1	Vulpes	10238.0	1	Vulpes vulpes	10238.0	1
scf7180000041319	271947	0.3547	0	62.3626	Eukaryota	59870.0	0	Chordata	59870.0	0	Carnivora	59870.0	0	Canidae	59870.0	0	Canis	59870.0	0	Canis lupus	59870.0	0
scf7180000049525	4482	0.4984	0	48.0434	Eukaryota	8042.0	0	Chordata	8042.0	0	Carnivora	8042.0	0	Canidae	8042.0	0	Canis	6484.0	1	Canis lupus	5334.0	2
scf7180000052247	1944	0.4408	0	325.0048	Eukaryota	607.0	0	Platyhelminthes	607.0	0	Polystomatidea	422.0	1	Polystomatidae	422.0	1	Protopolystoma	422.0	1	Protopolystoma xenopodis	422.0	1
scf7180000054080	9221	0.5043	0	73.2595	Eukaryota	32331.0	0	Chordata	32331.0	0	Carnivora	32331.0	0	Canidae	32331.0	0	Canis	32331.0	0	Canis lupus	32331.0	0
scf7180000046479	100121	0.5113	0	57.8142	Eukaryota	22618.0	0	Chordata	22618.0	0	Carnivora	22618.0	0	Canidae	22618.0	0	Canis	18283.0	1	Canis lupus	18283.0	1
scf7180000040570	2381792	0.3758	0	60.0806	Eukaryota	64213.0	0	Chordata	64213.0	0	Carnivora	64213.0	0	Canidae	64213.0	0	Canis	64213.0	0	Canis lupus	64213.0	0
scf7180000044077	319425	0.3429	0	58.4748	Eukaryota	25131.0	0	Chordata	25131.0	0	Carnivora	25131.0	0	Phocidae	7641.0	4	Leptonychotes	5068.0	8	Leptonychotes weddellii	5068.0	8
scf7180000056520	300146	0.3914	0	56.9527	Eukaryota	25707.0	0	Chordata	25707.0	0	Carnivora	25707.0	0	Canidae	25707.0	0	Canis	25707.0	0	Canis lupus	25707.0	0
scf7180000055627	23403	0.4412	0	281.4386	Eukaryota	7142.0	0	Chordata	7142.0	0	Carnivora	7142.0	0	Canidae	7142.0	0	Canis	7142.0	0	Canis lupus	7142.0	0
scf7180000045494	213195	0.5138	0	59.865	Eukaryota	30300.0	0	Chordata	30300.0	0	Carnivora	30300.0	0	Canidae	30300.0	0	Canis	24879.0	1	Canis lupus	24879.0	1
scf7180000047654	68527	0.4871	0	57.869	Eukaryota	66353.0	0	Chordata	66353.0	0	Carnivora	57822.0	3	Canidae	48637.0	5	Canis	48637.0	6	Canis lupus	48637.0	6
scf7180000048995	35941	0.4692	0	53.0884	Eukaryota	16924.0	0	Chordata	16924.0	0	Carnivora	15918.0	1	Canidae	15918.0	1	Canis	9339.0	2	Canis lupus	9339.0	2
scf7180000054042	3145	0.4518	0	779.3302	Eukaryota	387.0	0	Echinodermata	207.0	1	Forcipulatida	207.0	1	Asteriidae	207.0	1	Asterias	207.0	1	Asterias rubens	207.0	1
scf7180000049654	43261	0.3857	0	62.4515	Eukaryota	10696.0	0	Chordata	10696.0	0	Artiodactyla	6351.0	1	Bovidae	6351.0	1	Bison	4722.0	2	Bison bison	4722.0	2
scf7180000044420	41538	0.4355	0	53.8346	Eukaryota	4177.0	0	Chordata	4177.0	0	Carnivora	4177.0	0	Canidae	4177.0	0	Canis	4177.0	0	Canis lupus	4177.0	0
scf7180000048541	16870	0.4392	0	102.5524	Eukaryota	2744.0	0	Chordata	2522.0	1	Tetraodontiformes	1953.0	2	Tetraodontidae	1953.0	2	Takifugu	1953.0	2	Takifugu rubripes	1953.0	2
scf7180000056585	2046682	0.4599	0	60.2956	Eukaryota	105547.0	0	Chordata	105547.0	0	Carnivora	105547.0	0	Canidae	105547.0	0	Canis	84571.0	1	Canis lupus	84571.0	1
scf7180000049097	16064	0.4325	0	185.995	Eukaryota	88237.0	0	Chordata	88237.0	0	Carnivora	88237.0	0	Canidae	88237.0	0	Canis	88237.0	0	Canis lupus	88237.0	0
scf7180000042763	6915	0.333	0	37.6498	Eukaryota	5118.0	0	Chordata	5118.0	0	Carnivora	5118.0	0	Canidae	5118.0	0	Canis	5118.0	0	Canis lupus	5118.0	0
scf7180000044514	322517	0.4061	0	62.3772	Eukaryota	90319.0	0	Chordata	90319.0	0	Carnivora	90319.0	0	Canidae	90319.0	0	Canis	90319.0	0	Canis lupus	90319.0	0
scf7180000046596	213806	0.6458	0	55.8011	Eukaryota	44520.0	0	Chordata	44520.0	0	Carnivora	44520.0	0	Canidae	44520.0	0	Vulpes	28648.0	1	Vulpes vulpes	28648.0	1
scf7180000041293	30294	0.4524	0	133.94	Eukaryota	35127.0	0	Chordata	35127.0	0	Carnivora	35127.0	0	Canidae	35127.0	0	Canis	35127.0	0	Canis lupus	35127.0	0
scf7180000043848	345809	0.3693	0	60.1947	Eukaryota	20718.0	0	Chordata	20718.0	0	Carnivora	20718.0	0	Canidae	20718.0	0	Canis	18477.0	1	Canis lupus	18477.0	1
scf7180000042726	144728	0.3685	0	60.7591	Eukaryota	45944.0	0	Chordata	45944.0	0	Carnivora	45944.0	0	Canidae	45944.0	0	Canis	45944.0	0	Canis lupus	45944.0	0
scf7180000040854	19988	0.4499	0	36.9601	Eukaryota	21571.0	0	Chordata	21571.0	0	Carnivora	21571.0	0	Canidae	21571.0	0	Canis	21571.0	0	Canis lupus	21571.0	0
scf7180000047228	19239	0.4411	0	152.4464	Eukaryota	1013.0	0	Chordata	1013.0	0	Tetraodontiformes	713.0	1	Tetraodontidae	713.0	1	Takifugu	713.0	1	Takifugu rubripes	713.0	1
scf7180000044998	237946	0.4348	0	59.3022	Eukaryota	51706.0	0	Chordata	51706.0	0	Carnivora	51706.0	0	Canidae	42265.0	1	Canis	42265.0	1	Canis lupus	42265.0	1
scf7180000045838	162622	0.4065	0	60.7925	Eukaryota	36715.0	0	Chordata	36715.0	0	Carnivora	36715.0	0	Canidae	27616.0	1	Canis	20612.0	2	Canis lupus	20612.0	2
scf7180000052459	22924	0.5069	0	389.2202	Eukaryota	33449.0	0	Chordata	33449.0	0	Carnivora	33449.0	0	Canidae	33449.0	0	Canis	33449.0	0	Canis lupus	33449.0	0
scf7180000050609	2190	0.4516	0	454.3715	Eukaryota	2742.0	0	Chordata	2205.0	1	Tetraodontiformes	1259.0	2	Tetraodontidae	1259.0	2	Takifugu	1259.0	2	Takifugu rubripes	1259.0	2
scf7180000044633	173954	0.481	0	57.9041	Eukaryota	32513.0	0	Chordata	32513.0	0	Carnivora	32513.0	0	Canidae	32513.0	0	Vulpes	20532.0	1	Vulpes vulpes	20532.0	1
scf7180000045737	91608	0.3859	0	60.3548	Eukaryota	51269.0	0	Chordata	51269.0	0	Carnivora	51269.0	0	Canidae	51269.0	0	Canis	46159.0	1	Canis lupus	46159.0	1
scf7180000054932	16549	0.4416	0	346.3074	Eukaryota	1828.0	0	Chordata	1828.0	0	Tetraodontiformes	1328.0	2	Tetraodontidae	1328.0	2	Takifugu	1328.0	2	Takifugu rubripes	1328.0	2
scf7180000052056	4091	0.452	0	1775.3152	Eukaryota	3517.0	0	Platyhelminthes	1910.0	3	Polystomatidea	1910.0	3	Polystomatidae	1910.0	3	Protopolystoma	1910.0	3	Protopolystoma xenopodis	1910.0	3
scf7180000045250	210993	0.5309	0	56.4821	Eukaryota	50005.0	0	Chordata	50005.0	0	Carnivora	50005.0	0	Canidae	18488.0	4	Canis	12414.0	8	Canis lupus	12414.0	8
scf7180000046321	20950	0.4398	0	276.2037	no-hit	0.0	0	no-hit	0.0	0	no-hit	0.0	0	no-hit	0.0	0	no-hit	0.0	0	no-hit	0.0	0
scf7180000040872	1396885	0.3723	0	59.8286	Eukaryota	90335.0	0	Chordata	90335.0	0	Carnivora	90335.0	0	Canidae	90335.0	0	Canis	81607.0	1	Canis lupus	81607.0	1
scf7180000046476	27115	0.442	0	93.6698	Eukaryota	652.0	0	Streptophyta	652.0	0	Fabales	652.0	0	Fabaceae	652.0	0	Cicer	652.0	0	Cicer arietinum	652.0	0
scf7180000041253	1181536	0.4368	0	59.2035	Eukaryota	161172.0	0	Chordata	161172.0	0	Carnivora	161172.0	0	Canidae	161172.0	0	Canis	161172.0	0	Canis lupus	161172.0	0
scf7180000049940	44790	0.3439	0	59.8519	Eukaryota	6691.0	0	Chordata	6691.0	0	Primates	3369.0	4	Hominidae	2798.0	5	Homo	2798.0	5	Homo sapiens	2798.0	5
scf7180000052897	4904	0.4533	0	503.0581	Eukaryota	4490.0	0	Chordata	2323.0	2	Polystomatidea	1618.0	4	Polystomatidae	1618.0	4	Protopolystoma	1618.0	4	Protopolystoma xenopodis	1618.0	4
scf7180000051958	15311	0.4153	0	50.7825	Eukaryota	26433.0	0	Chordata	26433.0	0	Carnivora	26433.0	0	Canidae	14184.0	2	Canis	11340.0	4	Canis lupus	11340.0	4
scf7180000054831	22471	0.4413	0	326.225	Eukaryota	2640.0	0	Chordata	2640.0	0	Carnivora	2640.0	0	Canidae	2640.0	0	Canis	2640.0	0	Canis lupus	2640.0	0
scf7180000054465	25253	0.4444	0	487.3691	Eukaryota	2756.0	0	Chordata	2756.0	0	Carnivora	2308.0	1	Canidae	2308.0	1	Canis	2308.0	1	Canis lupus	2308.0	1
scf7180000050276	13239	0.454	0	47.2811	Eukaryota	10686.0	0	Chordata	5421.0	1	Strigeidida	4819.0	6	Schistosomatidae	4819.0	6	Schistosoma	4819.0	6	Schistosoma mansoni	4819.0	6
scf7180000041931	201664	0.3668	0	61.3273	Eukaryota	53834.0	0	Chordata	53834.0	0	Carnivora	53834.0	0	Canidae	53834.0	0	Canis	43160.0	1	Canis lupus	43160.0	1
scf7180000041626	1082811	0.3663	0	60.0924	Eukaryota	102700.0	0	Chordata	102700.0	0	Carnivora	102700.0	0	Canidae	102700.0	0	Canis	102700.0	0	Canis lupus	102700.0	0
scf7180000045598	12126	0.4714	0	42.5327	Eukaryota	2764.0	0	Chordata	2764.0	0	Carnivora	2468.0	1	Canidae	2468.0	1	Canis	2468.0	1	Canis lupus	2468.0	1
scf7180000041930	952825	0.5605	100	57.1337	Eukaryota	91590.0	0	Chordata	91590.0	0	Carnivora	91590.0	0	Canidae	91590.0	0	Canis	91590.0	0	Canis lupus	91590.0	0
scf7180000046136	148781	0.3787	0	59.6129	Eukaryota	51007.0	0	Chordata	51007.0	0	Carnivora	51007.0	0	Canidae	51007.0	0	Canis	51007.0	0	Canis lupus	51007.0	0
scf7180000045723	192966	0.4499	0	60.0731	Eukaryota	44134.0	0	Chordata	44134.0	0	Carnivora	44134.0	0	Canidae	44134.0	0	Canis	33118.0	1	Canis lupus	33118.0	1
scf7180000046762	66609	0.4583	0	58.2872	Eukaryota	14637.0	0	Chordata	14637.0	0	Carnivora	14637.0	0	Felidae	5754.0	3	Neomonachus	2984.0	7	Neomonachus schauinslandi	2984.0	7
scf7180000051592	35680	0.5896	0	59.3367	Eukaryota	27298.0	0	Chordata	27298.0	0	Carnivora	27298.0	0	Canidae	27298.0	0	Canis	24284.0	1	Canis lupus	24284.0	1
scf7180000055275	35817	0.4421	0	91.3346	Eukaryota	964.0	0	Platyhelminthes	773.0	1	Polystomatidea	773.0	1	Polystomatidae	773.0	1	Protopolystoma	773.0	1	Protopolystoma xenopodis	773.0	1
scf7180000040792	1815415	0.4108	0	83.3109	Eukaryota	125858.0	0	Chordata	125858.0	0	Carnivora	125858.0	0	Canidae	125858.0	0	Vulpes	102241.0	1	Vulpes vulpes	102241.0	1
scf7180000054340	15944	0.5172	0	442.023	Eukaryota	15930.0	0	Chordata	15930.0	0	Carnivora	15930.0	0	Canidae	15930.0	0	Canis	15930.0	0	Canis lupus	15930.0	0
scf7180000051762	4817	0.4536	0	1302.0354	no-hit	0.0	0	no-hit	0.0	0	no-hit	0.0	0	no-hit	0.0	0	no-hit	0.0	0	no-hit	0.0	0
scf7180000045791	181499	0.3977	0	60.6032	Eukaryota	52505.0	0	Chordata	52505.0	0	Carnivora	52505.0	0	Canidae	42638.0	1	Canis	31122.0	3	Canis lupus	31122.0	3
scf7180000054302	16881	0.4026	0	154.0405	Eukaryota	6013.0	0	Chordata	6013.0	0	Carnivora	5455.0	1	Felidae	1971.0	5	Felis	1971.0	7	Felis catus	1971.0	7
scf7180000055219	27427	0.441	0	157.9932	Eukaryota	53827.0	0	Chordata	33299.0	2	Gadiformes	15439.0	7	Gadidae	15439.0	7	Gadus	15439.0	7	Gadus morhua	15439.0	7
scf7180000048096	15668	0.5203	0	1114.2804	Eukaryota	16082.0	0	Chordata	16082.0	0	Carnivora	16082.0	0	Canidae	16082.0	0	Canis	16082.0	0	Canis lupus	16082.0	0
scf7180000053984	6343	0.4585	0	57.8239	Eukaryota	250.0	0	Chordata	250.0	0	Kurtiformes	250.0	0	Apogonidae	250.0	0	Sphaeramia	250.0	0	Sphaeramia orbicularis	250.0	0
scf7180000050776	3429	0.4369	0	138.7222	no-hit	0.0	0	no-hit	0.0	0	no-hit	0.0	0	no-hit	0.0	0	no-hit	0.0	0	no-hit	0.0	0
scf7180000051792	15359	0.4425	0	158.1571	Eukaryota	8534.0	0	Chordata	6882.0	3	Tetraodontiformes	3367.0	5	Tetraodontidae	3367.0	5	Takifugu	3367.0	5	Takifugu rubripes	3367.0	5
scf7180000052173	15308	0.5031	0	54.2517	Eukaryota	8355.0	0	Chordata	8355.0	0	Carnivora	8355.0	0	Canidae	8355.0	0	Canis	6789.0	1	Canis lupus	5614.0	2
scf7180000056364	865024	0.3697	0	61.0891	Eukaryota	59149.0	0	Chordata	59149.0	0	Carnivora	59149.0	0	Canidae	28191.0	2	Canis	15542.0	5	Canis lupus	15542.0	5
scf7180000049449	35131	0.4445	0	69.2562	Eukaryota	85535.0	0	Chordata	85535.0	0	Carnivora	85535.0	0	Canidae	85535.0	0	Canis	85535.0	0	Canis lupus	85535.0	0
scf7180000046635	18626	0.424	0	216.0287	Eukaryota	1926.0	0	Chordata	1719.0	1	Carnivora	1719.0	1	Herpestidae	756.0	3	Suricata	756.0	4	Suricata suricatta	756.0	4
scf7180000040769	11597	0.4069	0	47.5245	Eukaryota	40447.0	0	Chordata	40447.0	0	Carnivora	40447.0	0	Canidae	40447.0	0	Canis	40447.0	0	Canis lupus	40447.0	0
scf7180000043531	383679	0.3909	0	60.316	Eukaryota	65103.0	0	Chordata	65103.0	0	Carnivora	65103.0	0	Canidae	65103.0	0	Canis	45402.0	1	Canis lupus	45402.0	1
scf7180000050267	9605	0.4382	0	65.4947	Eukaryota	11104.0	0	Chordata	11104.0	0	Tetraodontiformes	11104.0	0	Tetraodontidae	11104.0	0	Takifugu	11104.0	0	Takifugu rubripes	11104.0	0
scf7180000055078	54171	0.4496	0	217.2783	Eukaryota	10788.0	0	Chordata	7863.0	2	Kurtiformes	4958.0	4	Apogonidae	4958.0	4	Sphaeramia	4958.0	4	Sphaeramia orbicularis	4958.0	4
scf7180000050601	2621	0.4456	0	246.2192	Eukaryota	1696.0	0	Chordata	1285.0	1	Carnivora	1285.0	1	Canidae	1285.0	1	Canis	1144.0	2	Canis lupus	1144.0	2
scf7180000050012	4519	0.4415	0	80.7603	Eukaryota	2060.0	0	Chordata	1494.0	1	Salmoniformes	716.0	3	Salmonidae	716.0	3	Coregonus	716.0	3	Coregonus sp. 'balchen'	716.0	3
scf7180000049035	54373	0.5298	0	58.5207	Eukaryota	17590.0	0	Chordata	17590.0	0	Carnivora	17590.0	0	Canidae	14280.0	1	Canis	14280.0	1	Canis lupus	14280.0	1
scf7180000051446	6214	0.4551	0	1355.6755	Eukaryota	135.0	0	Chordata	135.0	0	Salmoniformes	135.0	0	Salmonidae	135.0	0	Salmo	135.0	0	Salmo trutta	135.0	0
scf7180000049331	2962	0.4382	0	260.6573	no-hit	0.0	0	no-hit	0.0	0	no-hit	0.0	0	no-hit	0.0	0	no-hit	0.0	0	no-hit	0.0	0
scf7180000043982	579787	0.4066	0	59.2319	Eukaryota	62793.0	0	Chordata	62793.0	0	Carnivora	62793.0	0	Canidae	62793.0	0	Canis	51598.0	1	Canis lupus	51598.0	1
scf7180000050425	3217	0.4358	0	527.3115	Eukaryota	1292.0	0	Chordata	990.0	1	Kurtiformes	819.0	2	Apogonidae	819.0	2	Sphaeramia	819.0	2	Sphaeramia orbicularis	819.0	2
scf7180000040794	22715	0.4952	0	145.5972	Eukaryota	9469.0	0	Chordata	9469.0	0	Carnivora	9469.0	0	Canidae	9469.0	0	Canis	6971.0	1	Canis lupus	6971.0	1
scf7180000052916	5600	0.5059	0	97.6282	Eukaryota	8155.0	0	Chordata	8155.0	0	Carnivora	8155.0	0	Canidae	8155.0	0	Canis	6077.0	1	Canis lupus	4946.0	2
scf7180000045619	29061	0.4169	0	66.4267	Eukaryota	89031.0	0	Chordata	89031.0	0	Carnivora	89031.0	0	Canidae	89031.0	0	Canis	89031.0	0	Canis lupus	89031.0	0
scf7180000050953	3814	0.4491	0	531.6252	no-hit	0.0	0	no-hit	0.0	0	no-hit	0.0	0	no-hit	0.0	0	no-hit	0.0	0	no-hit	0.0	0
scf7180000054341	20486	0.4497	0	244.8356	Eukaryota	81509.0	0	Chordata	81509.0	0	Carnivora	81509.0	0	Canidae	81509.0	0	Canis	81509.0	0	Canis lupus	81509.0	0
scf7180000043445	421373	0.4939	0	59.7632	Eukaryota	28178.0	0	Chordata	28178.0	0	Carnivora	28178.0	0	Canidae	17726.0	1	Canis	13353.0	3	Canis lupus	13353.0	3
scf7180000042407	86319	0.4371	0	58.6929	Eukaryota	47437.0	0	Chordata	47437.0	0	Carnivora	47437.0	0	Canidae	47437.0	0	Canis	47437.0	0	Canis lupus	47437.0	0
scf7180000041990	98804	0.3976	0	56.6636	Eukaryota	89828.0	0	Chordata	89828.0	0	Carnivora	89828.0	0	Canidae	89828.0	0	Canis	89828.0	0	Canis lupus	89828.0	0
scf7180000044468	270665	0.5234	0	58.9306	Eukaryota	94219.0	0	Chordata	94219.0	0	Carnivora	94219.0	0	Canidae	94219.0	0	Canis	85958.0	1	Canis lupus	85958.0	1
scf7180000055530	39326	0.4437	0	152.5735	Eukaryota	34358.0	0	Platyhelminthes	21173.0	1	Strigeidida	20186.0	2	Schistosomatidae	20186.0	2	Schistosoma	20186.0	2	Schistosoma mansoni	20186.0	2
scf7180000050332	15207	0.4391	0	96.4502	Eukaryota	89063.0	0	Chordata	89063.0	0	Carnivora	89063.0	0	Canidae	89063.0	0	Canis	89063.0	0	Canis lupus	89063.0	0
scf7180000049740	8114	0.4493	0	1485.9108	Eukaryota	4341.0	0	Platyhelminthes	2183.0	3	Polystomatidea	2183.0	3	Polystomatidae	2183.0	3	Protopolystoma	2183.0	4	Protopolystoma xenopodis	2183.0	4
scf7180000048385	58328	0.6221	0	54.9854	Eukaryota	16701.0	0	Chordata	16701.0	0	Carnivora	16701.0	0	Canidae	16701.0	0	Canis	16701.0	0	Canis lupus	16701.0	0
scf7180000044181	50450	0.4433	0	56.7064	Eukaryota	8352.0	0	Chordata	8352.0	0	Carnivora	8352.0	0	Canidae	7191.0	1	Canis	6070.0	2	Canis lupus	6070.0	3
scf7180000055281	28174	0.4398	0	104.4788	Eukaryota	15146.0	0	Chordata	9491.0	2	Gadiformes	4471.0	6	Gadidae	4471.0	6	Gadus	4471.0	6	Gadus morhua	4471.0	6
scf7180000043728	434922	0.367	0	56.9905	Eukaryota	50678.0	0	Chordata	50678.0	0	Carnivora	50678.0	0	Canidae	50678.0	0	Canis	50678.0	0	Canis lupus	50678.0	0
scf7180000046561	111874	0.4617	0	58.8139	Eukaryota	18588.0	0	Chordata	18588.0	0	Carnivora	18588.0	0	Canidae	18588.0	0	Canis	18588.0	0	Canis lupus	18588.0	0
scf7180000042690	287532	0.5015	0	58.0805	Eukaryota	43784.0	0	Chordata	43784.0	0	Carnivora	43784.0	0	Canidae	43784.0	0	Canis	43784.0	0	Canis lupus	43784.0	0
scf7180000048418	6946	0.4411	0	121.6798	Eukaryota	1025.0	0	Platyhelminthes	559.0	1	Polystomatidea	559.0	2	Polystomatidae	559.0	2	Protopolystoma	559.0	2	Protopolystoma xenopodis	559.0	2
scf7180000045274	37614	0.4423	0	216.627	Eukaryota	7380.0	0	Chordata	7380.0	0	Carnivora	3052.0	3	Canidae	3052.0	3	Canis	3052.0	3	Canis lupus	3052.0	3
scf7180000054644	121933	0.4181	0	152.5449	Eukaryota	37067.0	0	Chordata	37067.0	0	Carnivora	37067.0	0	Canidae	37067.0	0	Canis	37067.0	0	Canis lupus	37067.0	0
scf7180000041682	388134	0.3952	0	58.6438	Eukaryota	63134.0	0	Chordata	63134.0	0	Carnivora	63134.0	0	Canidae	63134.0	0	Canis	63134.0	0	Canis lupus	63134.0	0
scf7180000043575	441928	0.3712	0	58.5321	Eukaryota	32010.0	0	Chordata	32010.0	0	Carnivora	32010.0	0	Canidae	32010.0	0	Canis	32010.0	0	Canis lupus	32010.0	0
scf7180000045381	197084	0.3942	0	60.364	Eukaryota	37399.0	0	Chordata	37399.0	0	Carnivora	37399.0	0	Canidae	37399.0	0	Canis	37399.0	0	Canis lupus	37399.0	0
scf7180000046276	117466	0.379	0	60.6029	Eukaryota	18986.0	0	Chordata	18986.0	0	Carnivora	18986.0	0	Canidae	6005.0	4	Canis	4010.0	8	Canis lupus	4010.0	8
scf7180000049089	16615	0.4403	0	198.4172	Eukaryota	676.0	0	Platyhelminthes	344.0	1	Polystomatidea	344.0	2	Polystomatidae	344.0	2	Protopolystoma	344.0	2	Protopolystoma xenopodis	344.0	2
scf7180000048414	61622	0.469	0	55.9185	Eukaryota	30650.0	0	Chordata	30650.0	0	Carnivora	30650.0	0	Canidae	30650.0	0	Canis	30650.0	0	Canis lupus	30650.0	0
scf7180000044937	240781	0.514	0	56.9877	Eukaryota	49232.0	0	Chordata	49232.0	0	Carnivora	49232.0	0	Canidae	39242.0	1	Canis	29385.0	3	Canis lupus	29385.0	4
scf7180000040989	1454440	0.4246	0	59.8934	Eukaryota	121842.0	0	Chordata	121842.0	0	Carnivora	121842.0	0	Canidae	121842.0	0	Canis	108889.0	1	Canis lupus	108889.0	1
scf7180000056218	567237	0.4192	0	60.5642	Eukaryota	55453.0	0	Chordata	55453.0	0	Carnivora	55453.0	0	Canidae	36048.0	2	Canis	21475.0	3	Canis lupus	21475.0	3
scf7180000041888	842252	0.3989	0	60.2122	Eukaryota	95524.0	0	Chordata	95524.0	0	Carnivora	95524.0	0	Canidae	95524.0	0	Canis	95524.0	0	Canis lupus	95524.0	0
scf7180000048991	45072	0.6523	0	54.0504	Eukaryota	31259.0	0	Chordata	31259.0	0	Carnivora	31259.0	0	Canidae	27517.0	2	Canis	24842.0	3	Canis lupus	24842.0	3
scf7180000042996	579998	0.3774	0	60.1314	Eukaryota	90080.0	0	Chordata	90080.0	0	Carnivora	90080.0	0	Canidae	90080.0	0	Canis	90080.0	0	Canis lupus	90080.0	0
scf7180000056253	224375	0.4515	0	57.4045	Eukaryota	40296.0	0	Chordata	40296.0	0	Carnivora	37125.0	1	Canidae	29113.0	3	Canis	25179.0	4	Canis lupus	25179.0	4
scf7180000048889	22808	0.4339	0	106.7033	Eukaryota	1719.0	0	Platyhelminthes	879.0	1	Polystomatidea	879.0	2	Polystomatidae	879.0	2	Protopolystoma	879.0	2	Protopolystoma xenopodis	879.0	2
scf7180000055576	24585	0.441	0	175.9395	Eukaryota	924.0	0	Platyhelminthes	924.0	0	Polystomatidea	924.0	0	Polystomatidae	924.0	0	Protopolystoma	924.0	0	Protopolystoma xenopodis	924.0	0
scf7180000053462	4575	0.5143	0	65.8935	Eukaryota	30120.0	0	Chordata	30120.0	0	Carnivora	30120.0	0	Canidae	30120.0	0	Canis	30120.0	0	Canis lupus	30120.0	0
scf7180000055784	9302	0.4366	0	449.8426	Eukaryota	1213.0	0	Platyhelminthes	1213.0	0	Polystomatidea	1213.0	0	Polystomatidae	1213.0	0	Protopolystoma	1213.0	0	Protopolystoma xenopodis	1213.0	0
scf7180000044426	314491	0.3929	0	60.5825	Eukaryota	56715.0	0	Chordata	56715.0	0	Carnivora	56715.0	0	Canidae	56715.0	0	Canis	40491.0	1	Canis lupus	40491.0	1
scf7180000042039	840592	0.376	0	60.1467	Eukaryota	88150.0	0	Chordata	88150.0	0	Carnivora	88150.0	0	Canidae	88150.0	0	Canis	88150.0	0	Canis lupus	88150.0	0
scf7180000043499	81815	0.3793	0	56.816	Eukaryota	38324.0	0	Chordata	38324.0	0	Carnivora	38324.0	0	Canidae	31838.0	1	Canis	19847.0	2	Canis lupus	19847.0	2
scf7180000056301	781219	0.3945	0	59.5061	Eukaryota	47556.0	0	Chordata	47556.0	0	Carnivora	47556.0	0	Canidae	39980.0	1	Canis	23204.0	2	Canis lupus	23204.0	2
scf7180000041808	954035	0.3873	0	60.4086	Eukaryota	28992.0	0	Chordata	28992.0	0	Carnivora	28992.0	0	Canidae	28992.0	0	Canis	25461.0	1	Canis lupus	25461.0	1
scf7180000046219	178076	0.5256	0	56.3943	Eukaryota	27328.0	0	Chordata	27328.0	0	Carnivora	27328.0	0	Canidae	27328.0	0	Canis	27328.0	0	Canis lupus	27328.0	0
scf7180000056455	316675	0.4184	0	62.1668	Eukaryota	32058.0	0	Chordata	32058.0	0	Carnivora	32058.0	0	Canidae	32058.0	0	Canis	32058.0	0	Canis lupus	32058.0	0
scf7180000040965	395158	0.3815	0	59.707	Eukaryota	44922.0	0	Chordata	44922.0	0	Carnivora	44922.0	0	Canidae	44922.0	0	Canis	44922.0	0	Canis lupus	44922.0	0
scf7180000056400	258370	0.488	0	56.5597	Eukaryota	43878.0	0	Chordata	43878.0	0	Carnivora	43878.0	0	Canidae	33510.0	1	Canis	24582.0	3	Canis lupus	24582.0	3
scf7180000048562	4194	0.432	0	102.6229	no-hit	0.0	0	no-hit	0.0	0	no-hit	0.0	0	no-hit	0.0	0	no-hit	0.0	0	no-hit	0.0	0
scf7180000047316	88539	0.4109	0	62.6129	Eukaryota	77418.0	0	Chordata	77418.0	0	Carnivora	77418.0	0	Canidae	77418.0	0	Canis	77418.0	0	Canis lupus	77418.0	0
scf7180000045021	4303	0.3667	0	56.3614	Eukaryota	3062.0	0	Chordata	3062.0	0	Carnivora	3062.0	0	Canidae	3062.0	0	Canis	3062.0	0	Canis lupus	3062.0	0
scf7180000053225	3021	0.4479	0	433.6105	no-hit	0.0	0	no-hit	0.0	0	no-hit	0.0	0	no-hit	0.0	0	no-hit	0.0	0	no-hit	0.0	0
scf7180000056484	372950	0.4071	0	58.9731	Eukaryota	53966.0	0	Chordata	53966.0	0	Carnivora	53966.0	0	Canidae	53966.0	0	Canis	48294.0	1	Canis lupus	48294.0	1
scf7180000041091	368932	0.4178	0	57.2719	Eukaryota	60864.0	0	Chordata	60864.0	0	Carnivora	60864.0	0	Canidae	60864.0	0	Canis	48324.0	1	Canis lupus	48324.0	1
scf7180000049466	5756	0.4375	0	124.1415	no-hit	0.0	0	no-hit	0.0	0	no-hit	0.0	0	no-hit	0.0	0	no-hit	0.0	0	no-hit	0.0	0
scf7180000045410	205237	0.4017	0	61.0781	Eukaryota	93761.0	0	Chordata	93761.0	0	Carnivora	93761.0	0	Canidae	93761.0	0	Canis	93761.0	0	Canis lupus	93761.0	0
scf7180000042156	773899	0.4229	0	59.0871	Eukaryota	58802.0	0	Chordata	58802.0	0	Carnivora	58802.0	0	Canidae	58802.0	0	Canis	52297.0	1	Canis lupus	52297.0	1
scf7180000050610	25704	0.4388	0	62.7666	Eukaryota	14852.0	0	Chordata	9327.0	2	Gadiformes	4455.0	6	Gadidae	4455.0	6	Gadus	4455.0	6	Gadus morhua	4455.0	6
scf7180000049624	16069	0.443	100	59.4204	Eukaryota	41617.0	0	Chordata	23658.0	2	Gadiformes	10737.0	7	Gadidae	10737.0	7	Gadus	10737.0	7	Gadus morhua	10737.0	7
scf7180000046417	22610	0.4364	0	143.5918	Eukaryota	32985.0	0	Chordata	32985.0	0	Carnivora	32985.0	0	Canidae	32985.0	0	Canis	32985.0	0	Canis lupus	32985.0	0
scf7180000045474	228120	0.3783	0	59.4645	Eukaryota	90686.0	0	Chordata	90686.0	0	Carnivora	90686.0	0	Canidae	90686.0	0	Canis	90686.0	0	Canis lupus	90686.0	0
scf7180000044414	17497	0.4434	0	91.3447	Eukaryota	16343.0	0	Chordata	13090.0	1	Tetraodontiformes	4608.0	5	Tetraodontidae	4608.0	5	Takifugu	4608.0	5	Takifugu rubripes	4608.0	5
scf7180000044447	174048	0.3639	0	60.558	Eukaryota	44861.0	0	Chordata	44861.0	0	Carnivora	44861.0	0	Canidae	44861.0	0	Canis	44861.0	0	Canis lupus	44861.0	0
scf7180000048083	16474	0.4434	0	57.4173	Eukaryota	4704.0	0	Chordata	4704.0	0	Tetraodontiformes	4704.0	0	Tetraodontidae	4704.0	0	Takifugu	4704.0	0	Takifugu rubripes	4704.0	0
scf7180000049293	51790	0.3625	0	59.9346	Eukaryota	29830.0	0	Chordata	29830.0	0	Carnivora	29830.0	0	Canidae	19775.0	3	Canis	15533.0	4	Canis lupus	15533.0	5
scf7180000047422	86132	0.4201	0	60.6542	Eukaryota	29765.0	0	Chordata	29765.0	0	Carnivora	29765.0	0	Canidae	29765.0	0	Canis	29765.0	0	Canis lupus	29765.0	0
scf7180000043593	162394	0.3896	0	58.7804	Eukaryota	32755.0	0	Chordata	32755.0	0	Carnivora	32755.0	0	Canidae	16453.0	1	Ursus	16302.0	2	Ursus arctos	16302.0	2
scf7180000046349	16411	0.4427	0	283.5981	no-hit	0.0	0	no-hit	0.0	0	no-hit	0.0	0	no-hit	0.0	0	no-hit	0.0	0	no-hit	0.0	0
scf7180000045411	125265	0.4364	0	58.0648	Eukaryota	14235.0	0	Chordata	14235.0	0	Carnivora	14235.0	0	Canidae	14235.0	0	Canis	11111.0	1	Canis lupus	11111.0	1
scf7180000056249	1090297	0.4618	0	59.3356	Eukaryota	88030.0	0	Chordata	88030.0	0	Carnivora	88030.0	0	Canidae	88030.0	0	Canis	88030.0	0	Canis lupus	88030.0	0
scf7180000054515	105040	0.4445	0	166.2395	Eukaryota	46408.0	0	Chordata	37065.0	1	Carnivora	37065.0	1	Canidae	37065.0	1	Canis	37065.0	1	Canis lupus	37065.0	1
scf7180000055838	9751	0.4439	0	112.9897	Eukaryota	3152.0	0	Chordata	3152.0	0	Carnivora	3152.0	0	Canidae	3152.0	0	Canis	3152.0	0	Canis lupus	3152.0	0
scf7180000048469	3051	0.3789	0	28.6572	Eukaryota	2592.0	0	Chordata	2592.0	0	Primates	1902.0	1	Hominidae	1902.0	1	Pan	1575.0	2	Pan troglodytes	1575.0	2
scf7180000043144	108370	0.4284	0	55.9972	Eukaryota	52143.0	0	Chordata	52143.0	0	Carnivora	52143.0	0	Canidae	52143.0	0	Canis	52143.0	0	Canis lupus	52143.0	0
scf7180000054160	76004	0.4407	0	389.4129	Eukaryota	93528.0	0	Chordata	93528.0	0	Carnivora	93528.0	0	Canidae	93528.0	0	Canis	93528.0	0	Canis lupus	93528.0	0
scf7180000052587	4434	0.4477	0	1188.7632	no-hit	0.0	0	no-hit	0.0	0	no-hit	0.0	0	no-hit	0.0	0	no-hit	0.0	0	no-hit	0.0	0
scf7180000044885	27374	0.3779	0	45.5339	Eukaryota	7721.0	0	Chordata	7721.0	0	Primates	4887.0	2	Hominidae	4887.0	2	Homo	3274.0	3	Homo sapiens	3274.0	3
scf7180000049968	9896	0.4434	0	92.0992	no-hit	0.0	0	no-hit	0.0	0	no-hit	0.0	0	no-hit	0.0	0	no-hit	0.0	0	no-hit	0.0	0
scf7180000048601	5485	0.4397	0	100.2681	Eukaryota	5301.0	0	Chordata	4447.0	2	Kurtiformes	2609.0	4	Apogonidae	2609.0	4	Sphaeramia	2609.0	4	Sphaeramia orbicularis	2609.0	4
scf7180000048079	49308	0.3558	0	58.7032	Eukaryota	10354.0	0	Chordata	10354.0	0	Carnivora	5885.0	2	Felidae	5184.0	3	Felis	4450.0	5	Felis catus	4450.0	5
scf7180000046092	112779	0.5016	0	55.7254	Eukaryota	16166.0	0	Chordata	16166.0	0	Carnivora	16166.0	0	Canidae	16166.0	0	Canis	16166.0	0	Canis lupus	16166.0	0
scf7180000041780	541541	0.3964	0	61.5406	Eukaryota	84747.0	0	Chordata	84747.0	0	Carnivora	84747.0	0	Canidae	84747.0	0	Canis	84747.0	0	Canis lupus	84747.0	0
scf7180000056467	349046	0.406	0	60.3734	Eukaryota	55673.0	0	Chordata	55673.0	0	Carnivora	55673.0	0	Canidae	55673.0	0	Canis	55673.0	0	Canis lupus	55673.0	0
scf7180000041997	116999	0.3498	0	56.8792	Eukaryota	30881.0	0	Chordata	30881.0	0	Carnivora	30881.0	0	Canidae	30881.0	0	Canis	30881.0	0	Canis lupus	30881.0	0
scf7180000056162	4731	0.446	0	158.8479	no-hit	0.0	0	no-hit	0.0	0	no-hit	0.0	0	no-hit	0.0	0	no-hit	0.0	0	no-hit	0.0	0
scf7180000042874	711047	0.4969	0	58.2766	Eukaryota	70175.0	0	Chordata	70175.0	0	Carnivora	70175.0	0	Canidae	70175.0	0	Canis	55201.0	1	Canis lupus	55201.0	1
scf7180000046980	20579	0.4472	0	52.2358	Eukaryota	73144.0	0	Chordata	62254.0	1	Carnivora	44573.0	2	Canidae	44573.0	2	Canis	44573.0	2	Canis lupus	44573.0	2
scf7180000051930	10649	0.5066	0	147.4951	Eukaryota	8396.0	0	Chordata	8396.0	0	Carnivora	8396.0	0	Canidae	8396.0	0	Canis	7272.0	1	Canis lupus	6135.0	2
scf7180000054218	29523	0.3869	0	601.7282	Eukaryota	39015.0	0	Chordata	39015.0	0	Carnivora	39015.0	0	Canidae	39015.0	0	Canis	39015.0	0	Canis lupus	39015.0	0
scf7180000042016	290388	0.3764	0	61.1641	Eukaryota	32823.0	0	Chordata	32823.0	0	Carnivora	32823.0	0	Canidae	32823.0	0	Canis	32823.0	0	Canis lupus	32823.0	0
scf7180000046522	11081	0.4447	0	82.5084	Eukaryota	3170.0	0	Chordata	3170.0	0	Carnivora	3170.0	0	Canidae	3170.0	0	Canis	3170.0	0	Canis lupus	3170.0	0
scf7180000042044	196903	0.3832	0	58.1372	Eukaryota	77180.0	0	Chordata	77180.0	0	Carnivora	77180.0	0	Canidae	77180.0	0	Canis	77180.0	0	Canis lupus	77180.0	0
scf7180000045901	9100	0.3836	0	26.222	Eukaryota	66792.0	0	Chordata	66792.0	0	Carnivora	66792.0	0	Canidae	66792.0	0	Canis	66792.0	0	Canis lupus	66792.0	0
scf7180000051032	9115	0.3954	0	32.645	Eukaryota	1964.0	0	Chordata	1964.0	0	Carnivora	1964.0	0	Canidae	1964.0	0	Canis	1964.0	0	Canis lupus	1964.0	0
scf7180000044827	149507	0.3881	0	57.9693	Eukaryota	57389.0	0	Chordata	57389.0	0	Carnivora	57389.0	0	Canidae	57389.0	0	Canis	57389.0	0	Canis lupus	57389.0	0
scf7180000043932	394982	0.394	0	59.3775	Eukaryota	80718.0	0	Chordata	80718.0	0	Carnivora	80718.0	0	Canidae	80718.0	0	Canis	63606.0	1	Canis lupus	63606.0	1
scf7180000045789	227983	0.3967	0	72.2866	Eukaryota	43652.0	0	Chordata	43652.0	0	Carnivora	43652.0	0	Canidae	43652.0	0	Canis	43652.0	0	Canis lupus	43652.0	0
scf7180000041397	155441	0.4832	0	90.2722	Eukaryota	89641.0	0	Chordata	89641.0	0	Carnivora	89641.0	0	Canidae	89641.0	0	Canis	89641.0	0	Canis lupus	89641.0	0
scf7180000050800	5012	0.4366	0	92.4158	Eukaryota	279.0	0	Platyhelminthes	279.0	0	Polystomatidea	279.0	0	Polystomatidae	279.0	0	Protopolystoma	279.0	0	Protopolystoma xenopodis	279.0	0
scf7180000055625	17925	0.4412	0	313.256	Eukaryota	11332.0	0	Platyhelminthes	10934.0	1	Cyclophyllidea	9588.0	2	Hymenolepididae	9588.0	2	Hymenolepis	9588.0	2	Hymenolepis microstoma	9588.0	2
scf7180000042339	806826	0.3952	0	60.541	Eukaryota	109820.0	0	Chordata	109820.0	0	Carnivora	109820.0	0	Canidae	109820.0	0	Canis	95212.0	1	Canis lupus	95212.0	1
scf7180000048829	55181	0.4572	0	57.6709	Eukaryota	33976.0	0	Chordata	33976.0	0	Carnivora	33976.0	0	Canidae	33976.0	0	Canis	33976.0	0	Canis lupus	33976.0	0
scf7180000041621	334165	0.543	0	53.0302	Eukaryota	33031.0	0	Chordata	33031.0	0	Carnivora	33031.0	0	Canidae	33031.0	0	Canis	30480.0	1	Canis lupus	30480.0	1
scf7180000047763	60029	0.5917	0	53.4815	Eukaryota	25758.0	1	Chordata	25758.0	1	Rodentia	6812.0	5	Muridae	6812.0	5	Mus	6812.0	6	Mus musculus	6812.0	6
scf7180000052781	4107	0.4336	0	125.4204	Eukaryota	1823.0	0	Chordata	1823.0	0	Kurtiformes	1349.0	2	Apogonidae	1349.0	2	Sphaeramia	1349.0	2	Sphaeramia orbicularis	1349.0	2
scf7180000043686	164532	0.3908	0	62.2045	Eukaryota	56459.0	0	Chordata	56459.0	0	Carnivora	56459.0	0	Canidae	56459.0	0	Canis	56459.0	0	Canis lupus	56459.0	0
scf7180000044602	303859	0.3453	0	58.4161	Eukaryota	87465.0	0	Chordata	87465.0	0	Carnivora	87465.0	0	Canidae	87465.0	0	Canis	87465.0	0	Canis lupus	87465.0	0
scf7180000049535	5327	0.4564	0	57.3974	no-hit	0.0	0	no-hit	0.0	0	no-hit	0.0	0	no-hit	0.0	0	no-hit	0.0	0	no-hit	0.0	0
scf7180000047147	95896	0.5013	0	55.6331	Eukaryota	20675.0	0	Chordata	20675.0	0	Carnivora	20675.0	0	Canidae	20675.0	0	Canis	20675.0	0	Canis lupus	20675.0	0
scf7180000046789	13398	0.4385	0	129.8662	Eukaryota	51253.0	0	Chordata	36981.0	2	Gadiformes	31730.0	5	Gadidae	31730.0	5	Gadus	31730.0	5	Gadus morhua	31730.0	5
scf7180000043027	607736	0.3585	0	61.2223	Eukaryota	45274.0	0	Chordata	45274.0	0	Carnivora	45274.0	0	Canidae	45274.0	0	Canis	45274.0	0	Canis lupus	45274.0	0
scf7180000051142	7580	0.4497	0	2187.1701	no-hit	0.0	0	no-hit	0.0	0	no-hit	0.0	0	no-hit	0.0	0	no-hit	0.0	0	no-hit	0.0	0
scf7180000049379	12314	0.4199	0	278.7507	Eukaryota	66944.0	0	Chordata	66944.0	0	Carnivora	66944.0	0	Canidae	66944.0	0	Canis	66944.0	0	Canis lupus	66944.0	0
scf7180000055254	14653	0.4913	0	259.4277	Eukaryota	37921.0	0	Chordata	37921.0	0	Carnivora	37921.0	0	Canidae	37921.0	0	Canis	37921.0	0	Canis lupus	37921.0	0
scf7180000046423	31771	0.439	0	126.3045	Eukaryota	26394.0	1	Chordata	26394.0	1	Gadiformes	10981.0	6	Gadidae	10981.0	6	Gadus	10981.0	6	Gadus morhua	10981.0	6
scf7180000044686	341713	0.3492	0	59.0757	Eukaryota	25849.0	0	Chordata	25849.0	0	Carnivora	25849.0	0	Canidae	25849.0	0	Canis	25849.0	0	Canis lupus	25849.0	0
scf7180000040915	1925740	0.3499	100	59.4826	Eukaryota	92500.0	0	Chordata	92500.0	0	Carnivora	92500.0	0	Canidae	92500.0	0	Canis	55583.0	1	Canis lupus	55583.0	1
scf7180000055013	59947	0.4392	0	182.7108	Eukaryota	5432.0	0	Chordata	3888.0	1	Tetraodontiformes	2736.0	3	Tetraodontidae	2736.0	3	Takifugu	2736.0	3	Takifugu rubripes	2736.0	3
scf7180000042840	608418	0.4518	0	58.6153	Eukaryota	53321.0	0	Chordata	53321.0	0	Carnivora	53321.0	0	Canidae	53321.0	0	Canis	53321.0	0	Canis lupus	53321.0	0
scf7180000044786	175148	0.5014	0	61.6329	Eukaryota	89614.0	0	Chordata	89614.0	0	Carnivora	89614.0	0	Canidae	89614.0	0	Canis	89614.0	0	Canis lupus	89614.0	0
scf7180000041340	102586	0.365	0	53.669	Eukaryota	88736.0	0	Chordata	88736.0	0	Carnivora	88736.0	0	Canidae	88736.0	0	Canis	88736.0	0	Canis lupus	88736.0	0
scf7180000050223	41402	0.4012	0	58.7725	Eukaryota	6918.0	0	Chordata	6918.0	0	Perissodactyla	4445.0	2	Equidae	3392.0	3	Equus	3392.0	3	Equus przewalskii	2317.0	4
scf7180000043563	83130	0.5042	0	68.5385	Eukaryota	16877.0	0	Chordata	16877.0	0	Carnivora	16877.0	0	Canidae	13262.0	2	Vulpes	6999.0	4	Vulpes vulpes	6999.0	4
scf7180000045705	32419	0.3617	0	92.5079	Eukaryota	32816.0	0	Chordata	32816.0	0	Carnivora	32816.0	0	Canidae	32816.0	0	Canis	32816.0	0	Canis lupus	32816.0	0
scf7180000044421	368147	0.3394	0	58.5094	Eukaryota	30314.0	0	Chordata	30314.0	0	Carnivora	30314.0	0	Canidae	30314.0	0	Canis	15177.0	1	Canis lupus	15177.0	1
scf7180000052400	23515	0.4364	0	145.3248	Eukaryota	4813.0	0	Chordata	3098.0	4	Columbiformes	2192.0	7	Columbidae	2192.0	7	Streptopelia	2192.0	8	Streptopelia turtur	2192.0	8
scf7180000048131	24276	0.4354	0	110.5037	Eukaryota	19170.0	0	Chordata	17133.0	2	Gadiformes	9782.0	7	Gadidae	9782.0	7	Gadus	9782.0	7	Gadus morhua	9782.0	7
scf7180000040626	2158011	0.3853	0	60.1413	Eukaryota	94985.0	0	Chordata	94985.0	0	Carnivora	94985.0	0	Canidae	94985.0	0	Canis	94985.0	0	Canis lupus	94985.0	0
scf7180000046951	73267	0.3636	0	64.322	Eukaryota	86746.0	0	Chordata	86746.0	0	Carnivora	86746.0	0	Canidae	86746.0	0	Canis	86746.0	0	Canis lupus	86746.0	0
scf7180000042199	754370	0.3958	0	60.3941	Eukaryota	74011.0	0	Chordata	74011.0	0	Carnivora	74011.0	0	Canidae	74011.0	0	Canis	74011.0	0	Canis lupus	74011.0	0
scf7180000046736	76974	0.3709	0	60.3301	Eukaryota	20898.0	0	Chordata	20898.0	0	Carnivora	20898.0	0	Canidae	20898.0	0	Canis	20898.0	0	Canis lupus	20898.0	0
scf7180000051390	4213	0.4498	0	397.3991	no-hit	0.0	0	no-hit	0.0	0	no-hit	0.0	0	no-hit	0.0	0	no-hit	0.0	0	no-hit	0.0	0
scf7180000045807	3815	0.5151	0	37.3445	Eukaryota	23815.0	0	Chordata	23815.0	0	Carnivora	23815.0	0	Canidae	23815.0	0	Canis	21624.0	1	Canis lupus	21624.0	1
scf7180000052572	3985	0.4487	0	373.0227	Eukaryota	165.0	0	Streptophyta	165.0	0	Fabales	165.0	0	Fabaceae	165.0	0	Cicer	165.0	0	Cicer arietinum	165.0	0
scf7180000040758	41685	0.3809	0	56.9471	Eukaryota	4182.0	0	Chordata	4182.0	0	Carnivora	2345.0	2	Canidae	1317.0	4	Canis	1317.0	4	Canis lupus	1317.0	4
scf7180000045515	166110	0.4164	0	58.0317	Eukaryota	56191.0	0	Chordata	56191.0	0	Carnivora	56191.0	0	Canidae	44661.0	4	Canis	35282.0	5	Canis lupus	35282.0	5
scf7180000052768	14740	0.4218	0	3446.6351	Eukaryota	103801.0	0	Chordata	103801.0	0	Carnivora	103801.0	0	Canidae	103801.0	0	Canis	87659.0	1	Canis latrans	58527.0	2
scf7180000048234	54684	0.3729	0	57.417	Eukaryota	26692.0	0	Chordata	26692.0	0	Carnivora	26692.0	0	Canidae	26692.0	0	Canis	26692.0	0	Canis lupus	26692.0	0
scf7180000046109	150551	0.4226	0	60.3086	Eukaryota	14816.0	0	Chordata	14816.0	0	Carnivora	14816.0	0	Canidae	14816.0	0	Canis	14816.0	0	Canis lupus	14816.0	0
scf7180000048568	11745	0.4393	0	86.1079	no-hit	0.0	0	no-hit	0.0	0	no-hit	0.0	0	no-hit	0.0	0	no-hit	0.0	0	no-hit	0.0	0
scf7180000048915	27063	0.4429	0	41.3841	Eukaryota	9877.0	0	Chordata	8115.0	1	Salmoniformes	4031.0	3	Salmonidae	4031.0	3	Salmo	4031.0	3	Salmo trutta	4031.0	3
scf7180000056474	207444	0.423	0	63.0757	Eukaryota	94646.0	0	Chordata	94646.0	0	Carnivora	94646.0	0	Canidae	94646.0	0	Canis	94646.0	0	Canis lupus	94646.0	0
scf7180000043808	228545	0.371	0	58.6195	Eukaryota	39152.0	0	Chordata	39152.0	0	Carnivora	39152.0	0	Canidae	18522.0	4	Vulpes	9378.0	7	Vulpes vulpes	9378.0	7
scf7180000049841	5467	0.4458	0	42.981	Eukaryota	2770.0	0	Chordata	2770.0	0	Carnivora	2770.0	0	Canidae	2770.0	0	Canis	2770.0	0	Canis lupus	2770.0	0
scf7180000042838	9736	0.4908	0	57.2234	Eukaryota	2652.0	0	Chordata	2652.0	0	Carnivora	2652.0	0	Canidae	2652.0	0	Canis	2319.0	1	Canis lupus	2319.0	1
scf7180000055377	42184	0.4413	0	120.927	Eukaryota	3095.0	0	Chordata	2771.0	1	Carnivora	2771.0	1	Canidae	2771.0	1	Canis	2771.0	1	Canis lupus	2771.0	1
scf7180000046793	100642	0.589	0	57.5705	Eukaryota	53211.0	0	Chordata	53211.0	0	Carnivora	53211.0	0	Canidae	53211.0	0	Canis	37313.0	1	Canis lupus	37313.0	1
scf7180000044607	8691	0.465	0	56.8881	Eukaryota	9200.0	0	Chordata	9200.0	0	Carnivora	9200.0	0	Canidae	9200.0	0	Canis	9200.0	0	Canis lupus	9200.0	0
scf7180000043421	397343	0.4385	0	61.1083	Eukaryota	54976.0	0	Chordata	54976.0	0	Carnivora	54976.0	0	Canidae	54976.0	0	Vulpes	29818.0	1	Vulpes vulpes	29818.0	1
scf7180000045022	266804	0.3789	0	59.7468	Eukaryota	21957.0	0	Chordata	21957.0	0	Carnivora	21957.0	0	Canidae	21957.0	0	Canis	21957.0	0	Canis lupus	21957.0	0
scf7180000048841	80595	0.4045	0	58.2734	Eukaryota	8000.0	0	Chordata	8000.0	0	Apterygiformes	7172.0	1	Apterygidae	7172.0	1	Apteryx	7172.0	1	Apteryx mantelli	7172.0	1
scf7180000052557	5035	0.4564	0	1083.6387	Eukaryota	3545.0	0	Platyhelminthes	1977.0	2	Polystomatidea	1977.0	2	Polystomatidae	1977.0	2	Protopolystoma	1977.0	2	Protopolystoma xenopodis	1977.0	2
scf7180000044787	288035	0.3888	0	59.991	Eukaryota	32579.0	0	Chordata	32579.0	0	Carnivora	32579.0	0	Canidae	32579.0	0	Canis	27655.0	1	Canis lupus	27655.0	1
scf7180000041735	900703	0.4398	0	59.1967	Eukaryota	122448.0	0	Chordata	122448.0	0	Carnivora	122448.0	0	Canidae	122448.0	0	Vulpes	83172.0	1	Vulpes vulpes	83172.0	1
scf7180000045694	198431	0.3971	0	61.6675	Eukaryota	31216.0	0	Chordata	31216.0	0	Carnivora	31216.0	0	Canidae	31216.0	0	Canis	15982.0	1	Canis lupus	15982.0	1
scf7180000053626	3414	0.4549	0	501.0378	Eukaryota	13724.0	0	Chordata	10176.0	2	Synbranchiformes	2938.0	6	Mastacembelidae	2938.0	6	Mastacembelus	2938.0	7	Mastacembelus armatus	2938.0	8
scf7180000044537	289032	0.3765	0	58.6299	Eukaryota	90576.0	0	Chordata	90576.0	0	Carnivora	90576.0	0	Canidae	90576.0	0	Canis	90576.0	0	Canis lupus	90576.0	0
scf7180000045916	9830	0.3642	0	50.9715	Eukaryota	3229.0	0	Chordata	3229.0	0	Carnivora	2492.0	1	Canidae	2492.0	1	Canis	2492.0	1	Canis lupus	2492.0	1
scf7180000043374	430117	0.3433	0	58.9984	Eukaryota	86018.0	0	Chordata	86018.0	0	Carnivora	86018.0	0	Canidae	86018.0	0	Canis	86018.0	0	Canis lupus	86018.0	0
scf7180000040641	104020	0.4233	0	60.5566	Eukaryota	54332.0	0	Chordata	54332.0	0	Carnivora	54332.0	0	Felidae	28742.0	1	Canis	12832.0	4	Canis lupus	12832.0	4
scf7180000050066	3841	0.4514	0	254.3578	no-hit	0.0	0	no-hit	0.0	0	no-hit	0.0	0	no-hit	0.0	0	no-hit	0.0	0	no-hit	0.0	0
scf7180000045453	191766	0.4414	0	61.7062	Eukaryota	112552.0	0	Chordata	112552.0	0	Carnivora	112552.0	0	Canidae	78954.0	3	Canis	72119.0	6	Canis lupus	72119.0	7
scf7180000050526	12847	0.4449	0	266.5882	Eukaryota	278.0	0	Chordata	278.0	0	Kurtiformes	278.0	0	Apogonidae	278.0	0	Sphaeramia	278.0	0	Sphaeramia orbicularis	278.0	0
scf7180000044652	212579	0.349	0	59.0898	Eukaryota	74751.0	0	Chordata	74751.0	0	Carnivora	74751.0	0	Canidae	30156.0	2	Vulpes	30156.0	2	Vulpes vulpes	30156.0	2
scf7180000043861	177329	0.3579	0	59.3011	Eukaryota	52711.0	0	Chordata	52711.0	0	Carnivora	52711.0	0	Canidae	52711.0	0	Canis	52711.0	0	Canis lupus	52711.0	0
scf7180000055146	35214	0.4461	0	167.6889	Eukaryota	4132.0	0	Chordata	3691.0	1	Columbiformes	2357.0	5	Columbidae	2357.0	5	Streptopelia	2357.0	5	Streptopelia turtur	2357.0	5
scf7180000042064	475061	0.4478	0	59.7209	Eukaryota	52177.0	1	Chordata	52177.0	1	Carnivora	47979.0	2	Canidae	47979.0	2	Canis	34831.0	3	Canis lupus	34831.0	3
scf7180000044195	89643	0.6084	0	53.801	Eukaryota	10484.0	0	Chordata	10484.0	0	Carnivora	7114.0	3	Canidae	7114.0	4	Canis	4602.0	5	Canis lupus	4602.0	5
scf7180000054168	1341089	0.3604	0	60.879	Eukaryota	90958.0	0	Chordata	90958.0	0	Carnivora	90958.0	0	Canidae	90958.0	0	Canis	90958.0	0	Canis lupus	90958.0	0
scf7180000050583	3619	0.4482	0	53.4601	Eukaryota	189.0	0	Platyhelminthes	189.0	0	Polystomatidea	189.0	0	Polystomatidae	189.0	0	Protopolystoma	189.0	0	Protopolystoma xenopodis	189.0	0
scf7180000042297	711004	0.37	0	60.0412	Eukaryota	93106.0	0	Chordata	93106.0	0	Carnivora	93106.0	0	Canidae	93106.0	0	Canis	93106.0	0	Canis lupus	93106.0	0
scf7180000043802	366551	0.4325	0	58.3095	Eukaryota	44346.0	0	Chordata	44346.0	0	Carnivora	44346.0	0	Canidae	23426.0	4	Canis	23426.0	5	Canis lupus	23426.0	5
scf7180000056339	630609	0.3602	0	60.1317	Eukaryota	90840.0	0	Chordata	90840.0	0	Carnivora	90840.0	0	Canidae	90840.0	0	Canis	90840.0	0	Canis lupus	90840.0	0
scf7180000044158	7895	0.4348	0	358.9492	Eukaryota	134.0	0	Chordata	134.0	0	Salmoniformes	134.0	0	Salmonidae	134.0	0	Coregonus	134.0	0	Coregonus sp. 'balchen'	134.0	0
scf7180000047196	21985	0.4453	0	75.7573	Eukaryota	2035.0	0	Chordata	2035.0	0	Salmoniformes	1484.0	2	Salmonidae	1484.0	2	Coregonus	929.0	3	Coregonus sp. 'balchen'	929.0	3
scf7180000044496	307383	0.3982	0	58.4613	Eukaryota	17437.0	0	Chordata	17437.0	0	Carnivora	17437.0	0	Canidae	17437.0	0	Canis	17437.0	0	Canis lupus	17437.0	0
scf7180000041413	598657	0.4486	0	58.4166	Eukaryota	101047.0	0	Chordata	101047.0	0	Carnivora	101047.0	0	Canidae	69388.0	2	Canis	69388.0	2	Canis lupus	69388.0	2
scf7180000042346	92098	0.396	0	57.7931	Eukaryota	12637.0	0	Chordata	12637.0	0	Carnivora	12637.0	0	Canidae	12637.0	0	Canis	12637.0	0	Canis lupus	12637.0	0
scf7180000044338	30267	0.3761	0	55.2384	Eukaryota	29785.0	0	Chordata	29785.0	0	Carnivora	29785.0	0	Canidae	29785.0	0	Canis	29785.0	0	Canis lupus	29785.0	0
scf7180000054451	47595	0.4414	0	154.291	Eukaryota	11267.0	0	Chordata	9316.0	1	Carnivora	6759.0	3	Canidae	6759.0	3	Canis	4296.0	5	Canis lupus	4296.0	5
scf7180000051812	3157	0.4495	0	276.9916	Eukaryota	1711.0	0	Echinodermata	763.0	2	Forcipulatida	763.0	2	Asteriidae	763.0	2	Asterias	763.0	2	Asterias rubens	763.0	2
scf7180000041358	1204649	0.3902	0	59.9593	Eukaryota	92010.0	0	Chordata	92010.0	0	Carnivora	92010.0	0	Canidae	92010.0	0	Canis	92010.0	0	Canis lupus	92010.0	0
scf7180000053196	2209	0.5079	0	20.4381	Eukaryota	5734.0	0	Chordata	5734.0	0	Carnivora	5734.0	0	Canidae	5734.0	0	Canis	4021.0	1	Canis lupus	3182.0	2
scf7180000051135	16539	0.4561	0	58.1671	Eukaryota	8108.0	0	Chordata	4923.0	2	Salmoniformes	4077.0	5	Salmonidae	4077.0	5	Salmo	4077.0	5	Salmo trutta	4077.0	5
scf7180000051217	13898	0.446	0	575.4173	Eukaryota	3392.0	0	Platyhelminthes	2088.0	2	Polystomatidea	2088.0	2	Polystomatidae	2088.0	2	Protopolystoma	2088.0	2	Protopolystoma xenopodis	2088.0	2
scf7180000044845	338873	0.5592	0	56.5818	Eukaryota	78674.0	0	Chordata	78674.0	0	Carnivora	78674.0	0	Canidae	78674.0	0	Canis	70027.0	1	Canis lupus	70027.0	1
scf7180000043104	4417	0.5196	0	23.4768	Eukaryota	3836.0	0	Chordata	3836.0	0	Primates	2033.0	2	Hominidae	1414.0	3	Homo	1414.0	3	Homo sapiens	1414.0	3
scf7180000053048	6998	0.4417	0	33.0385	no-hit	0.0	0	no-hit	0.0	0	no-hit	0.0	0	no-hit	0.0	0	no-hit	0.0	0	no-hit	0.0	0
scf7180000047040	28770	0.4387	0	177.7026	Eukaryota	1405.0	0	Chordata	835.0	2	Polystomatidea	351.0	4	Polystomatidae	351.0	4	Protopolystoma	351.0	4	Protopolystoma xenopodis	351.0	4
scf7180000046002	104272	0.4281	0	57.171	Eukaryota	7233.0	0	Chordata	7233.0	0	Carnivora	6309.0	1	Canidae	6309.0	1	Vulpes	6309.0	1	Vulpes vulpes	6309.0	1
scf7180000049312	9876	0.4417	0	1327.2936	Eukaryota	3757.0	0	Chordata	3757.0	0	Salmoniformes	3376.0	1	Salmonidae	3376.0	1	Coregonus	1692.0	2	Coregonus sp. 'balchen'	1692.0	2
scf7180000042090	1343300	0.3903	0	60.9459	Eukaryota	61871.0	0	Chordata	61871.0	0	Carnivora	61871.0	0	Canidae	38115.0	1	Zalophus	23756.0	2	Zalophus californianus	23756.0	2
scf7180000050155	38144	0.4396	0	58.6896	Eukaryota	2534.0	0	Platyhelminthes	2093.0	1	Polystomatidea	2093.0	2	Polystomatidae	2093.0	2	Protopolystoma	2093.0	2	Protopolystoma xenopodis	2093.0	2
scf7180000041348	1102732	0.4304	0	58.7674	Eukaryota	94454.0	0	Chordata	94454.0	0	Carnivora	94454.0	0	Canidae	94454.0	0	Canis	94454.0	0	Canis lupus	94454.0	0
scf7180000046347	28624	0.4456	0	219.3862	Eukaryota	2744.0	0	Chordata	2744.0	0	Carnivora	2744.0	0	Canidae	2744.0	0	Canis	2744.0	0	Canis lupus	2744.0	0
scf7180000048892	43103	0.4965	0	80.022	Eukaryota	9597.0	0	Chordata	9597.0	0	Carnivora	9597.0	0	Canidae	9597.0	0	Canis	8965.0	1	Canis lupus	7819.0	2
scf7180000044835	275130	0.3573	0	60.2967	Eukaryota	37808.0	0	Chordata	37808.0	0	Carnivora	37808.0	0	Canidae	27611.0	2	Canis	23690.0	4	Canis lupus	23690.0	4
scf7180000042491	23777	0.4109	0	858.6034	Eukaryota	88145.0	0	Chordata	88145.0	0	Carnivora	88145.0	0	Canidae	88145.0	0	Canis	88145.0	0	Canis lupus	88145.0	0
scf7180000044453	299234	0.4516	0	64.3801	Eukaryota	86474.0	0	Chordata	86474.0	0	Carnivora	86474.0	0	Canidae	86474.0	0	Canis	86474.0	0	Canis lupus	86474.0	0
scf7180000042764	561124	0.4075	0	60.1652	Eukaryota	50736.0	0	Chordata	50736.0	0	Carnivora	50736.0	0	Canidae	50736.0	0	Canis	38672.0	1	Canis lupus	38672.0	1
scf7180000048686	30332	0.5014	0	667.2869	Eukaryota	9214.0	0	Chordata	9214.0	0	Carnivora	9214.0	0	Canidae	9214.0	0	Canis	7465.0	1	Canis lupus	6199.0	2
scf7180000048660	2760	0.4518	0	78.584	no-hit	0.0	0	no-hit	0.0	0	no-hit	0.0	0	no-hit	0.0	0	no-hit	0.0	0	no-hit	0.0	0
scf7180000046326	6273	0.4398	0	88.6475	no-hit	0.0	0	no-hit	0.0	0	no-hit	0.0	0	no-hit	0.0	0	no-hit	0.0	0	no-hit	0.0	0
scf7180000055233	2870	0.4575	0	97.6498	no-hit	0.0	0	no-hit	0.0	0	no-hit	0.0	0	no-hit	0.0	0	no-hit	0.0	0	no-hit	0.0	0
scf7180000053978	5004	0.442	0	31.7472	no-hit	0.0	0	no-hit	0.0	0	no-hit	0.0	0	no-hit	0.0	0	no-hit	0.0	0	no-hit	0.0	0
scf7180000045561	194490	0.4615	0	60.2111	Eukaryota	26886.0	0	Chordata	26886.0	0	Carnivora	26886.0	0	Canidae	26886.0	0	Canis	22911.0	1	Canis lupus	22911.0	1
scf7180000041085	128087	0.415	0	60.2067	Eukaryota	9118.0	0	Chordata	9118.0	0	Carnivora	6550.0	1	Otariidae	3880.0	2	Homo	2568.0	4	Homo sapiens	2568.0	4
scf7180000042921	563794	0.3747	0	58.7673	Eukaryota	16014.0	0	Chordata	16014.0	0	Carnivora	14200.0	1	Canidae	14200.0	1	Canis	14200.0	1	Canis lupus	14200.0	1
scf7180000042778	39765	0.4591	0	53.5618	Eukaryota	11780.0	0	Chordata	11780.0	0	Carnivora	11780.0	0	Canidae	7647.0	1	Canis	7647.0	2	Canis lupus	7647.0	2
scf7180000051033	7903	0.35	0	34.7045	Eukaryota	11698.0	0	Chordata	11698.0	0	Carnivora	11698.0	0	Canidae	8088.0	1	Canis	8088.0	2	Canis lupus	8088.0	2
scf7180000052789	14518	0.4244	0	57.876	Eukaryota	3256.0	0	Chordata	3256.0	0	Carnivora	3256.0	0	Canidae	3256.0	0	Canis	3256.0	0	Canis lupus	3256.0	0
scf7180000043324	499449	0.3685	0	59.012	Eukaryota	93494.0	0	Chordata	93494.0	0	Carnivora	93494.0	0	Canidae	93494.0	0	Canis	93494.0	0	Canis lupus	93494.0	0
scf7180000040521	2606080	0.4025	0	61.924	Eukaryota	120754.0	0	Chordata	120754.0	0	Carnivora	120754.0	0	Canidae	120754.0	0	Canis	120754.0	0	Canis lupus	120754.0	0
scf7180000040870	1472792	0.4347	100	59.4325	Eukaryota	54391.0	0	Chordata	54391.0	0	Carnivora	54391.0	0	Canidae	54391.0	0	Canis	46511.0	1	Canis lupus	46511.0	1
scf7180000041636	944068	0.3574	0	61.0561	Eukaryota	93662.0	0	Chordata	93662.0	0	Carnivora	93662.0	0	Canidae	93662.0	0	Canis	93662.0	0	Canis lupus	93662.0	0
scf7180000044781	197778	0.3623	0	58.8049	Eukaryota	13866.0	0	Chordata	13866.0	0	Carnivora	13866.0	0	Canidae	13866.0	0	Canis	13866.0	0	Canis lupus	13866.0	0
scf7180000050565	28833	0.4171	0	61.1399	Eukaryota	59620.0	0	Chordata	59620.0	0	Carnivora	59620.0	0	Canidae	49481.0	2	Canis	28484.0	3	Canis lupus	28484.0	4
scf7180000048573	14555	0.4456	0	259.2705	no-hit	0.0	0	no-hit	0.0	0	no-hit	0.0	0	no-hit	0.0	0	no-hit	0.0	0	no-hit	0.0	0
scf7180000050720	10592	0.5789	0	305.029	Eukaryota	42938.0	0	Chordata	42938.0	0	Artiodactyla	30119.0	2	Bovidae	30119.0	2	Ovis	17048.0	3	Ovis aries	17048.0	3
scf7180000050868	37183	0.504	0	1165.9912	Eukaryota	9425.0	0	Chordata	9425.0	0	Carnivora	9425.0	0	Canidae	9425.0	0	Canis	8182.0	1	Canis lupus	6882.0	2
scf7180000051995	10668	0.5061	0	208.8964	Eukaryota	8807.0	0	Chordata	8807.0	0	Carnivora	8807.0	0	Canidae	8807.0	0	Canis	7091.0	1	Canis lupus	5851.0	2
scf7180000042881	15267	0.3789	0	48.4404	Eukaryota	3916.0	0	Chordata	3916.0	0	Carnivora	3916.0	0	Canidae	3916.0	0	Canis	3916.0	0	Canis lupus	3916.0	0
scf7180000041913	784089	0.3656	0	59.6671	Eukaryota	145637.0	0	Chordata	145637.0	0	Carnivora	145637.0	0	Canidae	81322.0	1	Canis	65045.0	3	Canis lupus	65045.0	3
scf7180000051292	10648	0.4423	0	242.9646	Eukaryota	206.0	0	Chordata	206.0	0	Tetraodontiformes	206.0	0	Tetraodontidae	206.0	0	Takifugu	206.0	0	Takifugu rubripes	206.0	0
scf7180000051018	13796	0.4611	0	147.0752	Eukaryota	10157.0	0	Chordata	10157.0	0	Carnivora	8884.0	1	Canidae	8884.0	1	Canis	5011.0	2	Canis lupus	5011.0	2
scf7180000049472	16922	0.4475	0	1421.0806	Eukaryota	3447.0	0	Platyhelminthes	1900.0	2	Polystomatidea	1900.0	2	Polystomatidae	1900.0	2	Protopolystoma	1900.0	2	Protopolystoma xenopodis	1900.0	2
scf7180000050803	19103	0.5159	0	921.9329	Eukaryota	17128.0	0	Chordata	17128.0	0	Carnivora	17128.0	0	Canidae	17128.0	0	Canis	17128.0	0	Canis lupus	17128.0	0
scf7180000044099	61002	0.5418	0	52.8929	Eukaryota	4559.0	0	Chordata	4559.0	0	Primates	2949.0	1	Hominidae	2064.0	2	Homo	2064.0	2	Homo sapiens	2064.0	3
scf7180000047679	61647	0.3922	0	60.3554	Eukaryota	14214.0	0	Chordata	14214.0	0	Carnivora	14214.0	0	Canidae	14214.0	0	Canis	14214.0	0	Canis lupus	14214.0	0
scf7180000042582	342289	0.4643	0	58.7577	Eukaryota	64357.0	0	Chordata	64357.0	0	Carnivora	64357.0	0	Canidae	64357.0	0	Canis	64357.0	0	Canis lupus	64357.0	0
scf7180000042746	371501	0.4472	0	59.0326	Eukaryota	58285.0	0	Chordata	58285.0	0	Carnivora	58285.0	0	Canidae	58285.0	0	Canis	58285.0	0	Canis lupus	58285.0	0
scf7180000041088	63380	0.4204	0	50.7359	Eukaryota	11102.0	0	Chordata	11102.0	0	Primates	4688.0	2	Hominidae	4688.0	3	Mus	3948.0	4	Mus musculus	3948.0	4
scf7180000052212	4470	0.451	0	782.2258	no-hit	0.0	0	no-hit	0.0	0	no-hit	0.0	0	no-hit	0.0	0	no-hit	0.0	0	no-hit	0.0	0
scf7180000044345	335057	0.3646	0	58.6043	Eukaryota	33715.0	0	Chordata	33715.0	0	Carnivora	33715.0	0	Canidae	24090.0	2	Canis	20559.0	4	Canis lupus	20559.0	4
scf7180000051250	12240	0.4528	0	908.0949	Eukaryota	424.0	0	Platyhelminthes	424.0	0	Polystomatidea	424.0	0	Polystomatidae	424.0	0	Protopolystoma	424.0	0	Protopolystoma xenopodis	424.0	0
scf7180000047932	8185	0.4468	0	453.9747	Eukaryota	267.0	0	Platyhelminthes	267.0	0	Polystomatidea	267.0	0	Polystomatidae	267.0	0	Protopolystoma	267.0	0	Protopolystoma xenopodis	267.0	0
scf7180000047890	79697	0.3756	0	61.2352	Eukaryota	25819.0	0	Chordata	25819.0	0	Carnivora	25819.0	0	Canidae	25819.0	0	Canis	25819.0	0	Canis lupus	25819.0	0
scf7180000050719	10949	0.5019	0	364.8851	Eukaryota	8232.0	0	Chordata	8232.0	0	Carnivora	8232.0	0	Canidae	8232.0	0	Canis	5909.0	1	Canis lupus	4680.0	2
scf7180000044991	100486	0.3752	0	55.2438	Eukaryota	18324.0	0	Chordata	18324.0	0	Carnivora	18324.0	0	Canidae	18324.0	0	Canis	18324.0	0	Canis lupus	18324.0	0
scf7180000050611	3140	0.4452	0	69.281	no-hit	0.0	0	no-hit	0.0	0	no-hit	0.0	0	no-hit	0.0	0	no-hit	0.0	0	no-hit	0.0	0
scf7180000053503	1803	0.4515	0	150.531	no-hit	0.0	0	no-hit	0.0	0	no-hit	0.0	0	no-hit	0.0	0	no-hit	0.0	0	no-hit	0.0	0
scf7180000051013	14180	0.437	0	34.8303	Eukaryota	7254.0	0	Chordata	2820.0	3	Forcipulatida	1967.0	5	Asteriidae	1967.0	5	Asterias	1967.0	6	Asterias rubens	1967.0	6
scf7180000049187	45733	0.4387	0	74.7544	Eukaryota	1841.0	0	Platyhelminthes	1393.0	1	Polystomatidea	1393.0	1	Polystomatidae	1393.0	1	Protopolystoma	1393.0	1	Protopolystoma xenopodis	1393.0	1
scf7180000044903	247641	0.4169	0	59.0852	Eukaryota	57954.0	0	Chordata	57954.0	0	Carnivora	57954.0	0	Otariidae	42562.0	1	Zalophus	32020.0	2	Zalophus californianus	32020.0	2
scf7180000056145	12478	0.523	0	612.4028	Eukaryota	16050.0	0	Chordata	16050.0	0	Carnivora	16050.0	0	Canidae	16050.0	0	Canis	16050.0	0	Canis lupus	16050.0	0
scf7180000049992	8531	0.4327	0	399.2795	Eukaryota	46559.0	0	Chordata	46559.0	0	Carnivora	46559.0	0	Canidae	46559.0	0	Canis	46559.0	0	Canis lupus	46559.0	0
scf7180000053119	5791	0.4462	0	231.6843	Eukaryota	1982.0	0	Platyhelminthes	1107.0	1	Polystomatidea	1107.0	2	Polystomatidae	1107.0	2	Protopolystoma	1107.0	2	Protopolystoma xenopodis	1107.0	2
scf7180000041427	253716	0.4266	0	56.5936	Eukaryota	37182.0	0	Chordata	37182.0	0	Carnivora	37182.0	0	Canidae	37182.0	0	Canis	29027.0	1	Canis lupus	29027.0	1
scf7180000056214	1366355	0.3928	0	65.106	Eukaryota	91490.0	0	Chordata	91490.0	0	Carnivora	91490.0	0	Canidae	91490.0	0	Canis	91490.0	0	Canis lupus	91490.0	0
scf7180000052561	2989	0.458	0	393.5917	Eukaryota	1406.0	0	Echinodermata	610.0	2	Forcipulatida	610.0	2	Asteriidae	610.0	2	Asterias	610.0	2	Asterias rubens	610.0	2
scf7180000050495	4225	0.4469	0	319.1905	Eukaryota	1753.0	0	Platyhelminthes	938.0	2	Polystomatidea	938.0	2	Polystomatidae	938.0	2	Protopolystoma	938.0	2	Protopolystoma xenopodis	938.0	2
scf7180000050946	24295	0.4487	0	79.2168	Eukaryota	3856.0	0	Chordata	3856.0	0	Carnivora	2513.0	1	Canidae	2513.0	1	Canis	2513.0	1	Canis lupus	2513.0	1
scf7180000045778	150305	0.4312	0	58.4415	Eukaryota	14388.0	0	Chordata	14388.0	0	Carnivora	10445.0	2	Canidae	7764.0	3	Canis	5802.0	6	Canis lupus	5802.0	6
scf7180000050581	2285	0.4363	0	1184.0773	Eukaryota	741.0	0	Chordata	741.0	0	Columbiformes	741.0	0	Columbidae	741.0	0	Streptopelia	741.0	0	Streptopelia turtur	741.0	0
scf7180000047944	76945	0.4619	0	59.9927	Eukaryota	23145.0	0	Chordata	23145.0	0	Carnivora	20185.0	2	Canidae	18210.0	3	Canis	18210.0	3	Canis lupus	18210.0	4
scf7180000047158	18297	0.4355	0	73.1788	Eukaryota	8725.0	0	Chordata	7058.0	1	Carnivora	6265.0	2	Canidae	6265.0	2	Canis	5799.0	3	Canis lupus	5799.0	3
[truncated: 9,082 more rows]
