# Supplementary material for: High-quality carnivoran genomes from roadkill samples enable comparative species delineation in aardwolf and bat-eared fox
Source: eLife. 2021 Feb 18;10:e63167. doi: 10.7554/eLife.63167 (PMC7963486; doi:10.7554/eLife.63167)
Supplement: Supplementary file 12. — The ‘OMM’ column indicates if the genome was available on OMM (yes) or not (no). The ‘Annotation’ column indicates whether the genome was already annotated (yes) or not (no). [file elife-63167-supp12.xlsx]

## Sheet: Appendix_S10_Carnivora_assembli
Species	Order	Family	Accession	AssemblyName	Database	Assembly	Busco scores					OMM	Annotation
							Complete	Fragmented	Missing	Single	Duplicated
Acinonyx jubatus	Carnivora	Felidae	GCF_001443585.1	aciJub1	NCBI	Acinonyx jubatus [aciJub1]	90.5	6	3.5	90.2	0.3	Yes	Yes
Ailuropoda melanoleuca	Carnivora	Ursidae	GCF_000004335.2	AilMel_1.0	NCBI	Ailuropoda melanoleuca [AilMel_1.0]	92.9	4.6	2.5	92.6	0.3	Yes	Yes
Ailurus fulgens	Carnivora	Ailuridae	ASM200746v1_DNAZoo_HiC	ASM200746v1_DNAZoo_HiC	DNAZoo	Ailurus fulgens [ASM200746v1_DNAZoo_HiC]	95.4	2.3	2.3	94.6	0.8	No	Yes
Arctocephalus gazella	Carnivora	Otariidae	GCA_900500725.1	ArcGazv1.4	NCBI	Arctocephalus gazella [ArcGazv1.4]	81.6	12.4	6	80.8	0.8	No	No
Callorhinus ursinus	Carnivora	Otariidae	GCF_003265705.1	ASM326570v1	NCBI	Callorhinus ursinus [ASM326570v1]	93	3.6	3.4	81.2	11.8	No	Yes
Canis lupus	Carnivora	Canidae	GCF_000002285.3	CanFam3.1	NCBI	Canis lupus [CanFam3.1]	95.3	2.4	2.3	94	1.3	Yes	Yes
Crocuta crocuta	Carnivora	Hyaenidae	GCA_008692635.1	BGI_CrCroc_1.0	NCBI	Crocuta crocuta [BGI_CrCroc_1.0]	95.5	2.5	2	95	0.5	No	No
Cryptoprocta ferox	Carnivora	Eupleridae	GCA_004023885.1	CryFer_v1_BIUU	NCBI	Cryptoprocta ferox [CryFer_v1_BIUU]	85.9	10.6	3.5	84.9	1	No	No
Enhydra lutris	Carnivora	Mustelidae	GCF_002288905.1	ASM228890v2	NCBI	Enhydra lutris [ASM228890v2]	94.2	3.5	2.3	93.2	1	Yes	Yes
Eumetopias jubatus	Carnivora	Otariidae	GCF_004028035.1	ASM402803v1	NCBI	Eumetopias jubatus [ASM402803v1]	93.4	3.7	2.9	91.2	2.2	No	Yes
Felis catus	Carnivora	Felidae	GCF_000181335.3	Felis_catus_9.0	NCBI	Felis catus [Felis_catus_9]	93.1	3.8	3.1	92.7	0.4	Yes	Yes
Gulo gulo	Carnivora	Mustelidae	GCA_900006375.2	Gulo_2.2_annotated	NCBI	Gulo gulo [Gulo_2.2]	85.4	10.6	4	85	0.4	No	Yes
Helogale parvula	Carnivora	Herpestidae	GCA_004023845.1	HelPar_v1_BIUU	NCBI	Helogale parvula [HelPar_v1_BIUU]	83.9	11.8	4.3	83.2	0.7	No	No
Hyaena hyaena	Carnivora	Hyaenidae	GCA_003009895.1	ASM300989v1	NCBI	Hyaena hyaena [ASM300989v1]	93.5	4	2.5	92.8	0.7	No	No
Leptonychotes weddellii	Carnivora	Phocidae	GCF_000349705.1	LepWed1.0	NCBI	Leptonychotes weddellii [LepWed1.0]	78.8	15.3	5.9	77.8	1	Yes	Yes
Lutra lutra	Carnivora	Mustelidae	mLutLut1_DNAZoo_HiC	mLutLut1_DNAZoo_HiC	DNAZoo	Lutra lutra [mLutLut1_DNAZoo_HiC]	95.5	2.2	2.3	94.1	1.4	No	Yes
Lycaon pictus	Carnivora	Canidae	sis2-181106_DNAZoo_HiC	sis2-181106_DNAZoo_HiC	DNAZoo	Lycaon pictus [sis2-181106_DNAZoo_HiC]	94.7	2.5	2.8	93.5	1.2	No	Yes
Lynx canadensis	Carnivora	Felidae	GCA_007474595.1	mLynCan4_v1.p	NCBI	Lynx canadensis [mLynCan4_v1.p_VGP]	94.6	2.7	2.7	94.2	0.4	No	Yes
Lynx pardinus	Carnivora	Felidae	GCA_900661375.1	LYPA1.0	NCBI	Lynx pardinus [LYPA1.0]	94.4	3.1	2.5	93.9	0.5	No	Yes
Mellivora capensis	Carnivora	Mustelidae	GCA_004024625.1	MelCap_v1_BIUU	NCBI	Mellivora capensis [MelCap_v1_BIUU]	78.2	16.1	5.7	77.7	0.5	No	No
Mirounga angustirostris	Carnivora	Phocidae	Mirounga_angustirostris_DNAZoo_HiC	Mirounga_angustirostris_DNAZoo_HiC	DNAZoo	Mirounga angustirostris [Mirounga_angustirostris_DNAZoo_HiC]	94.7	2.8	2.5	93.7	1	No	Yes
Mungos mungo	Carnivora	Herpestidae	GCA_004023785.1	MunMun_v1_BIUU	NCBI	Mungos mungo [MunMun_v1_BIUU]	87.4	9.1	3.5	86.6	0.8	No	No
Mustela putorius	Carnivora	Mustelidae	GCF_000215625.1	MusPutFur1.0	NCBI	Mustela putorius [MusPutFur1.0]	93.5	3.9	2.6	92.9	0.6	Yes	Yes
Nasua narica	Carnivora	Procyonidae	Nasua_narica_DNAZoo_HiC	Nasua_narica_DNAZoo_HiC	DNAZoo	Nasua narica [Nasua_narica_DNAZoo_HiC]	90.7	5	4.3	90.1	0.6	No	No
Neofelis nebulosa	Carnivora	Felidae	Neofelis_nebulosa_DNAZoo_HiC	Neofelis_nebulosa_DNAZoo_HiC	DNAZoo	Neofelis nebulosa [Neofelis_nebulosa_DNAZoo_HiC]	95.8	1.9	2.3	95.1	0.7	No	Yes
Neomonachus schauinslandi	Carnivora	Phocidae	GCF_002201575.1	ASM220157v1	NCBI	Neomonachus schauinslandi [ASM220157v1]	93	4.3	2.7	91.9	1.1	Yes	Yes
Neovison vison	Carnivora	Mustelidae	GCA_900108605.1	NNQGG.v01	NCBI	Neovison vison [NNQGG.v01]	94	3.8	2.2	93.4	0.6	No	No
Odobenus rosmarus	Carnivora	Odobenidae	GCF_000321225.1	Oros_1.0	NCBI	Odobenus rosmarus [Oros_1.0]	93.4	3.8	2.8	91.9	1.5	Yes	Yes
Otocyon megalotis	Carnivora	Canidae	ISEM_TS305_MaSuRCA	Otoc_meg_TS305_MaSuRCA	ISEM	Otocyon megalotis [ISEM_TS305_MaSuRCA]	92.9	4.2	2.9	91.7	1.2	No	Yes
Panthera leo	Carnivora	Felidae	GCA_008795835.1	PanLeo1.0	NCBI	Panthera leo [PanLeo1.0]	96.2	1.9	1.9	95.6	0.6	No	No
Panthera onca	Carnivora	Felidae	GCA_004023805.1	PanOnc_v1_BIUU	NCBI	Panthera onca [PanOnc_v1_BIUU]	78.4	15.7	5.9	78	0.4	No	No
Panthera pardus	Carnivora	Felidae	GCF_001857705.1	PanPar1.0	NCBI	Panthera pardus [PanPar1.0]	93.5	3.8	2.7	92.7	0.8	Yes	Yes
Panthera tigris	Carnivora	Felidae	GCF_000464555.1	PanTig1.0	NCBI	Panthera tigris [PanTig1.0]	91.5	5.3	3.2	91.2	0.3	Yes	Yes
Paradoxurus hermaphroditus	Carnivora	Viverridae	GCA_004024585.1	ParHer_v1_BIUU	NCBI	Paradoxurus hermaphroditus [ParHer_v1_BIUU]	74.8	18.4	6.8	74.2	0.6	No	No
Phoca vitulina	Carnivora	Phocidae	GSC_HSeal_1.0_DNAZoo_HiC	GSC_HSeal_1.0_DNAZoo_HiC	DNAZoo	Phoca vitulina [GSC_HSeal_1.0_DNAZoo_HiC]	95.2	2.3	2.5	94.1	1.1	No	Yes
Potos flavus	Carnivora	Procyonidae	Potos_flavus_DNAZoo_HiC	Potos_flavus_DNAZoo_HiC	DNAZoo	Potos flavus [Potos_flavus_DNAZoo_HiC]	92.7	4.4	2.9	92.2	0.5	No	Yes
Prionailurus bengalensis	Carnivora	Felidae	GCA_005406085.1	Prionailurus_bengalensis_euptilurus_v01	NCBI	Prionailurus bengalensis [Prionailurus_bengalensis_euptilurus_v01]	84.2	11	4.8	83.7	0.5	No	No
Procyon lotor	Carnivora	Procyonidae	pl-1k_DNAZoo_HiC	pl-1k_DNAZoo_HiC	DNAZoo	Procyon lotor [pl-1k_DNAZoo_HiC]	87.8	7.2	5	87.2	0.6	No	Yes
Proteles cristatus	Carnivora	Hyaenidae	ISEM_TS307_MaSuRCA	Prot_cri_TS307_MaSuRCA	ISEM	Proteles cristatus [ISEM_TS307_MaSuRCA]	92.8	3.8	3.4	92.3	0.5	No	Yes
Pteronura brasiliensis	Carnivora	Mustelidae	GCA_004024605.1	PteBra_v1_BIUU	NCBI	Pteronura brasiliensis [PteBra_v1_BIUU]	82	13.3	4.7	81.4	0.6	No	No
Puma concolor	Carnivora	Felidae	GCF_003327715.1	PumCon1.0	NCBI	Puma concolor [PumCon1]	93.4	3.4	3.2	93	0.4	No	Yes
Spilogale gracilis	Carnivora	Mephitidae	GCA_004023965.1	SpiGra_v1_BIUU	NCBI	Spilogale gracilis [SpiGra_v1_BIUU]	76.7	17.1	6.2	76.1	0.6	No	No
Suricata suricatta	Carnivora	Herpestidae	GCF_006229205.1	meerkat_22Aug2017_6uvM2_HiC	DNAZoo	Suricata suricatta [meerkat_22Aug2017_6uvM2_DNAZoo_HiC]	94.7	2.6	2.7	93.5	1.2	No	Yes
Taxidea taxus	Carnivora	Mustelidae	GCA_003697995.1	ASM369799v1	NCBI	Taxidea taxus [ASM369799v1]	58.5	28.4	13.1	57.5	1	No	No
Ursus americanus	Carnivora	Ursidae	ASM334442v1_DNAZoo_HiC	ASM334442v1_DNAZoo_HiC	DNAZoo	Ursus americanus [ASM334442v1_DNAZoo_HiC]	93.9	3.3	2.8	93.3	0.6	No	Yes
Ursus arctos	Carnivora	Ursidae	ASM358476v1_DNAZoo_HiC	ASM358476v1_DNAZoo_HiC	DNAZoo	Ursus arctos [ASM358476v1_DNAZoo_HiC]	95.7	2	2.3	94.8	0.9	No	Yes
Ursus maritimus	Carnivora	Ursidae	GCF_000687225.1	UrsMar_1.0	NCBI	Ursus maritimus [UrsMar_1]	91.8	5.5	2.7	91.4	0.4	Yes	Yes
Ursus thibetanus	Carnivora	Ursidae	GCA_009660055.1	ASM966005v1	NCBI	Ursus thibetanus [ASM966005v1]	95.8	1.8	2.4	94.4	1.4	No	No
Vulpes vulpes	Carnivora	Canidae	VulVul2.2_DNAZoo_HiC	VulVul2.2_DNAZoo_HiC	NCBI	Vulpes vulpes [VulVul2.2_DNAZoo_HiC]	94.7	2.8	2.5	93.3	1.4	No	Yes
Zalophus californianus	Carnivora	Otariidae	GCF_900631625.1	zalCal2.2	NCBI	Zalophus californianus [zalCal2.2]	93.3	3.7	3	91.8	1.5	No	Yes
