# Supplementary figures and images for: High-quality carnivoran genomes from roadkill samples enable comparative species delineation in aardwolf and bat-eared fox
Source: eLife journal article supplement (doi:10.7554/elife.63167), 2021-02-18

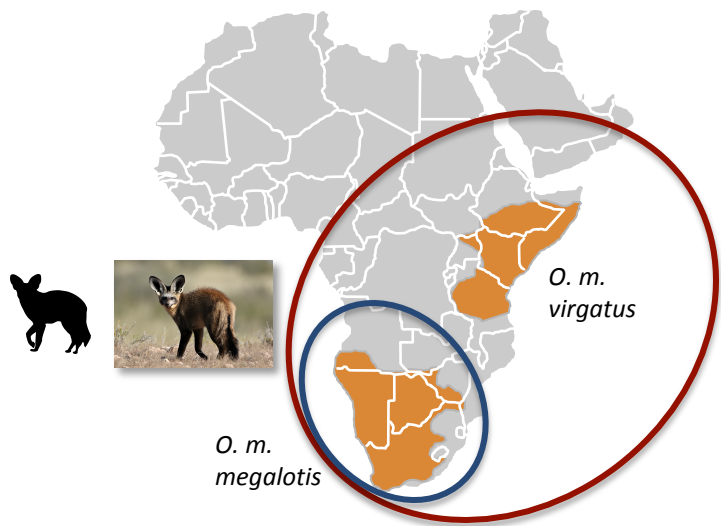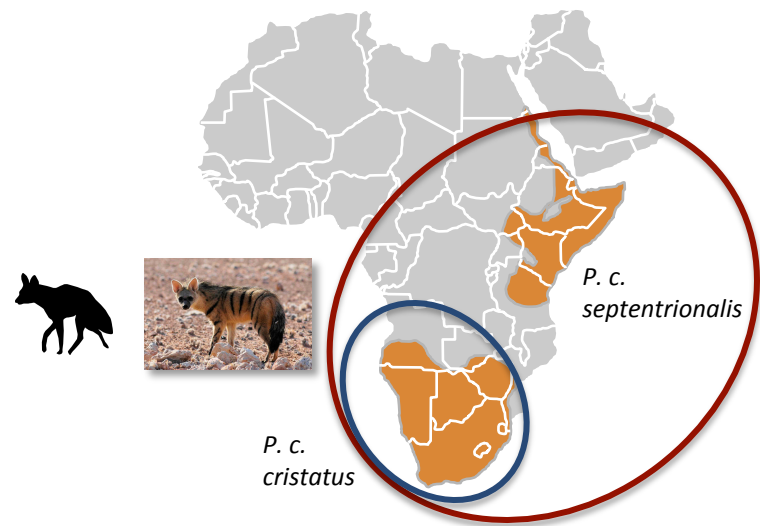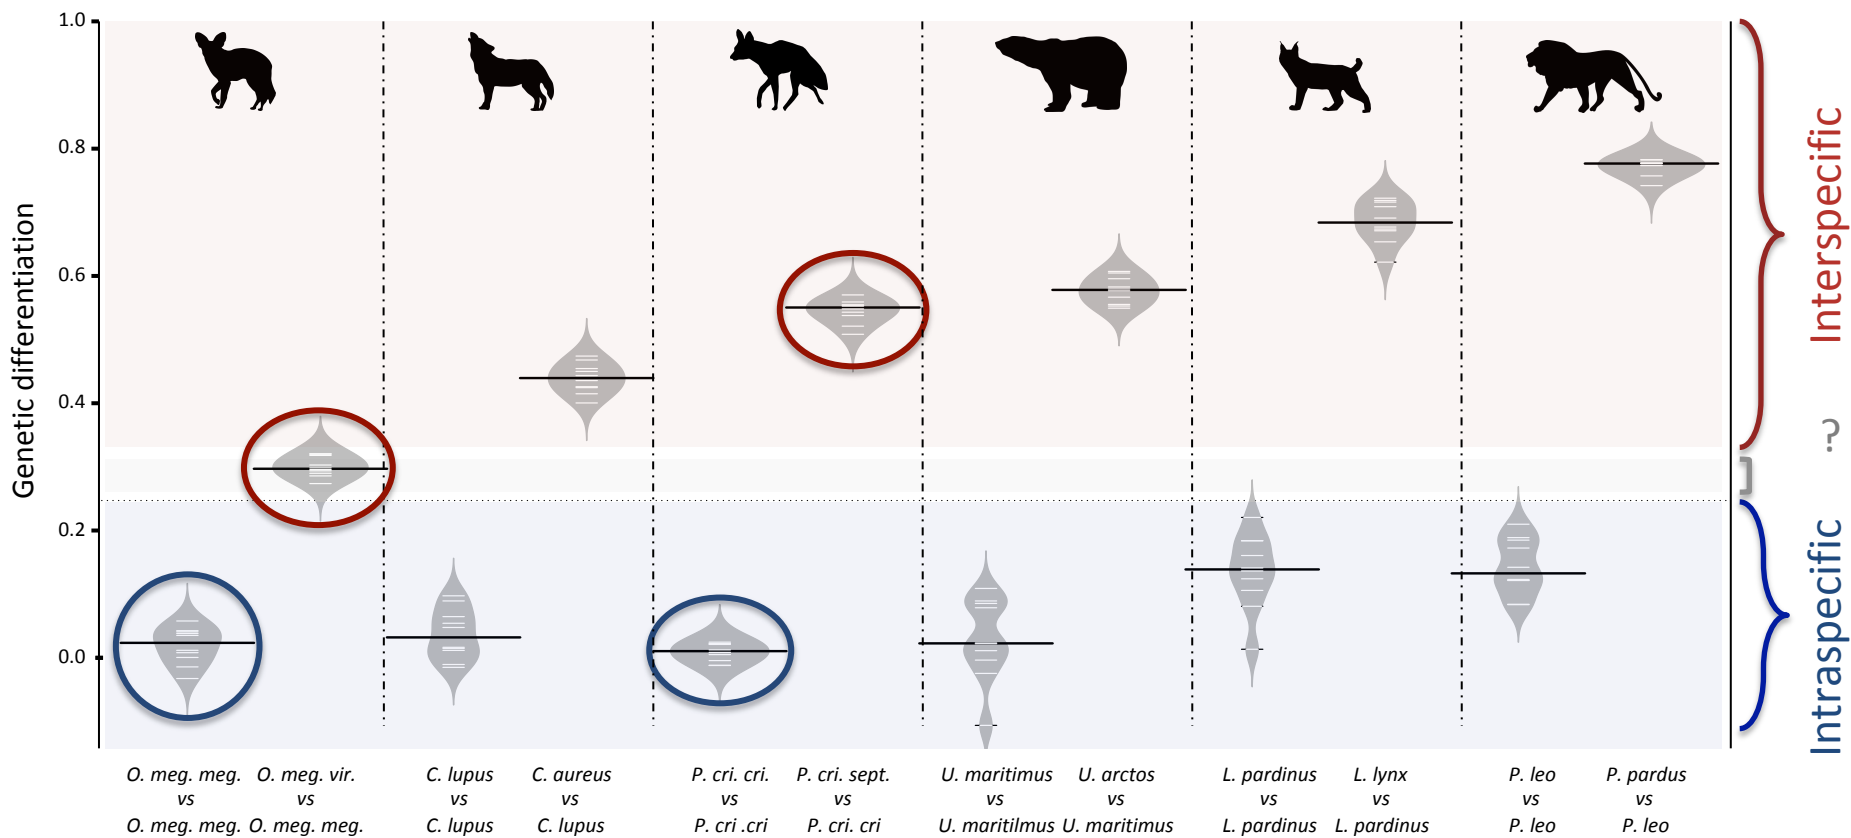

Supplement: supp [file elife-63167-supp-v1.zip]

# Genetic differentiation

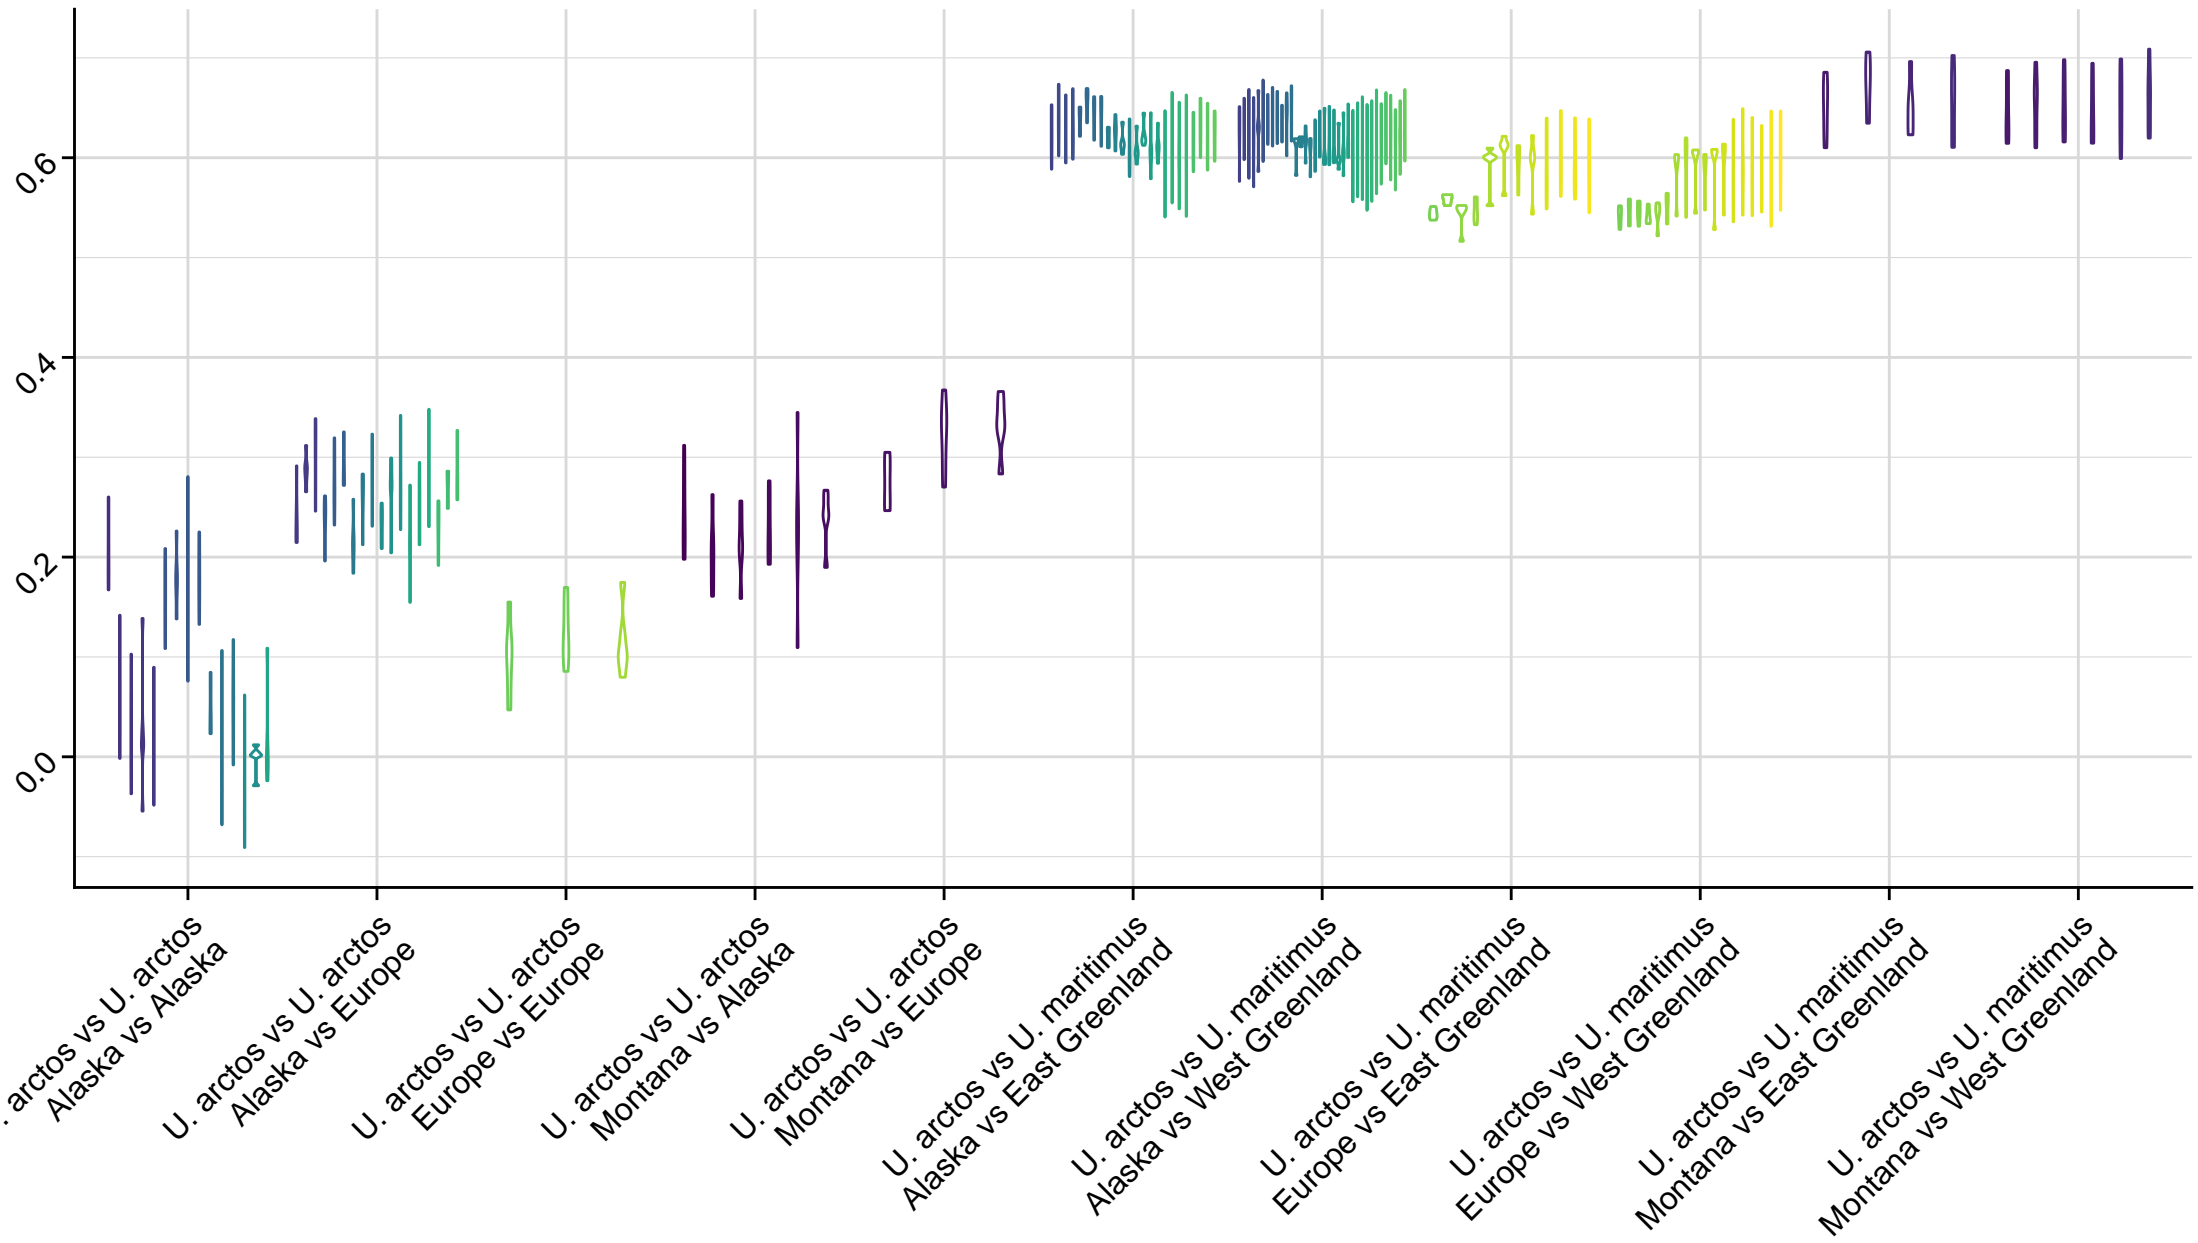

Supplement: supp [file elife-63167-supp-v1.zip]
